# Supplementary material for: Differential coexpression in human tissues and the confounding effect of mean expression levels
Source: Bioinformatics. 2018 Jul 3;35(1):55–61. doi: 10.1093/bioinformatics/bty538 (PMC6298061; doi:10.1093/bioinformatics/bty538)
Supplement: Supplementary Data [file bty538_suppl_data.zip]

Archive with 17 entries (17 files):
- blood_TSExclusiveDiseaseTerms_linkRemoval.txt
- blood_TSExclusiveFunctionTerms_linkRemoval.txt
- brain_TSExclusiveDiseaseTerms_linkRemoval.txt
- brain_TSExclusiveFunctionTerms_linkRemoval.txt
- enrichedTerms_TAN_TSN_table.tsv
- liver_TSExclusiveDiseaseTerms_linkRemoval.txt
- liver_TSExclusiveFunctionTerms_linkRemoval.txt
- lung_TSExclusiveDiseaseTerms_linkRemoval.txt
- lung_TSExclusiveFunctionTerms_linkRemoval.txt
- skeletalMuscle_TSExclusiveDiseaseTerms_linkRemoval.txt
- skeletalMuscle_TSExclusiveFunctionTerms_linkRemoval.txt
- SupplementaryText.pdf
- TSlinksTSS_blood_pureLinks_GTEx_exp.csv
- TSlinksTSS_brain_cortex_pureLinks_GTEx_exp.csv
- TSlinksTSS_liver_pureLinks_GTEx_exp.csv
- TSlinksTSS_lung_pureLinks_GTEx_exp.csv
- TSlinksTSS_muscle_pureLinks_GTEx_exp.csv
