# Supplementary material for: Differential coexpression in human tissues and the confounding effect of mean expression levels
Source: Bioinformatics. 2018 Jul 3;35(1):55–61. doi: 10.1093/bioinformatics/bty538 (PMC6298061; doi:10.1093/bioinformatics/bty538)
Supplement: Supplementary Data [file bty538_suppl_data.zip › blood_TSExclusiveDiseaseTerms_linkRemoval.txt]

DOID	Name	geneCount	linkCount(lc)	lc_minusPurLinks	lc_minusExpressionInducedLinks	1-ratioOfPureLinks	1-RatioOfExpressionInducedLinks	SigAfterPureRemoval	SigAfterExpressionInducedRemoval	log10Pvalue_plus1e-20	log10PvalueAfterPureRemoval_plus1e-20	log10PvalueAfterEIremovalplus1e-20	significantCountIn100_randomPureLinkRemoval	significantCountIn100_randomEILinkRemoval
9743	diabetic neuropathy	12	2	2	2	1.00	1.00	1	1	-5.54	-5.54	-5.54	58	74
11503	diabetic autonomic neuropathy	12	2	2	2	1.00	1.00	1	1	-5.54	-5.54	-5.54	58	74
12785	diabetic polyneuropathy	12	2	2	2	1.00	1.00	1	1	-5.54	-5.54	-5.54	58	74
