# Supplementary material for: Differential coexpression in human tissues and the confounding effect of mean expression levels
Source: Bioinformatics. 2018 Jul 3;35(1):55–61. doi: 10.1093/bioinformatics/bty538 (PMC6298061; doi:10.1093/bioinformatics/bty538)
Supplement: Supplementary Data [file bty538_suppl_data.zip › blood_TSExclusiveFunctionTerms_linkRemoval.txt]

functionID	functionName	geneCount	linkCount(lc)	lc_minusPurLinks	lc_minusExpressionInducedLinks	1-ratioOfPureLinks	1-RatioOfExpressionInducedLinks	SigAfterPureRemoval	SigAfterExpressionInducedRemoval	log10Pvalue_plus1e-20	log10PvalueAfterPureRemoval_plus1e-20	log10PvalueAfterEIremovalplus1e-20	significantCountIn100_randomPureLinkRemoval	significantCountIn100_randomEILinkRemoval
19751	polyol metabolic process	23	3	3	3	1.00	1.00	1	1	-5.40	-5.40	-5.40	42	62
42307	positive regulation of protein import into nucleus	30	4	4	4	1.00	1.00	1	1	-5.95	-5.95	-5.95	30	52
46777	protein autophosphorylation	68	11	11	11	1.00	1.00	1	1	-9.54	-9.54	-9.54	91	98
1904591	positive regulation of protein import	31	4	4	4	1.00	1.00	1	1	-5.81	-5.81	-5.81	30	52
