# Supplementary material for: Differential coexpression in human tissues and the confounding effect of mean expression levels
Source: Bioinformatics. 2018 Jul 3;35(1):55–61. doi: 10.1093/bioinformatics/bty538 (PMC6298061; doi:10.1093/bioinformatics/bty538)
Supplement: Supplementary Data [file bty538_suppl_data.zip › brain_TSExclusiveDiseaseTerms_linkRemoval.txt]

DOID	Name	geneCount	linkCount(lc)	lc_minusPurLinks	lc_minusExpressionInducedLinks	1-ratioOfPureLinks	1-RatioOfExpressionInducedLinks	SigAfterPureRemoval	SigAfterExpressionInducedRemoval	log10Pvalue_plus1e-20	log10PvalueAfterPureRemoval_plus1e-20	log10PvalueAfterEIremovalplus1e-20	significantCountIn100_randomPureLinkRemoval	significantCountIn100_randomEILinkRemoval_pureCount	significantCountIn100_randomEILinkRemoval
302	substance abuse	45	24	23	3	0.96	0.12	1	0	-11.99	-11.18	-0.25	100	45	83
303	substance-related disorder	44	17	16	3	0.94	0.18	1	0	-7	-6.31	-0.28	70	5	12
332	amyotrophic lateral sclerosis	96	146	135	54	0.92	0.37	1	1	-20	-20	-11.56	100	100	100
543	dystonia	8	3	3	1	1	0.33	1	0	-5.31	-5.31	-2.25	62	0	32
1094	attention deficit hyperactivity disorder	52	41	41	5	1	0.12	1	0	-20	-20	-0.36	100	0	100
1826	epilepsy syndrome	24	14	13	1	0.93	0.07	1	0	-12.07	-10.91	-0.52	99	48	87
2055	post-traumatic stress disorder	10	4	3	2	0.75	0.5	0	0	-5.96	-4.48	-3.1	57	23	23
2481	infantile epileptic encephalopathy	13	14	14	5	1	0.36	1	1	-20	-20	-6.09	100	100	100
3213	demyelinating disease	5	5	5	1	1	0.2	1	0	-12.07	-12.07	-3.15	100	0	98
3312	bipolar disorder	79	76	73	22	0.96	0.29	1	0	-20	-20	-2.39	100	87	100
8736	smallpox	34	12	11	10	0.92	0.83	1	0	-6.17	-5.4	-4.65	39	100	5
8869	neuromyelitis optica	5	2	2	1	1	0.5	1	0	-5.12	-5.12	-3.15	75	0	47
10595	Charcot-Marie-Tooth disease	26	11	9	7	0.82	0.64	1	0	-7.9	-5.98	-4.22	94	0	32
12849	autistic disorder	80	130	130	35	1	0.27	1	1	-20	-20	-7.26	100	99	100
50425	restless legs syndrome	5	3	3	3	1	1	1	1	-7.28	-7.28	-7.28	90	0	64
50541	Charcot-Marie-Tooth disease type 4	16	6	6	6	1	1	1	1	-6.18	-6.18	-6.18	70	0	28
50709	Ohtahara syndrome	15	17	17	4	1	0.24	1	0	-20	-20	-4.15	100	100	100
50776	non-syndromic X-linked intellectual disability	13	13	13	7	1	0.54	1	1	-20	-20	-8.92	100	100	100
