# Supplementary material for: Differential coexpression in human tissues and the confounding effect of mean expression levels
Source: Bioinformatics. 2018 Jul 3;35(1):55–61. doi: 10.1093/bioinformatics/bty538 (PMC6298061; doi:10.1093/bioinformatics/bty538)
Supplement: Supplementary Data [file bty538_suppl_data.zip › brain_TSExclusiveFunctionTerms_linkRemoval.txt]

functionID	functionName	geneCount	linkCount(lc)	lc_minusPurLinks	lc_minusExpressionInducedLinks	1-ratioOfPureLinks	1-RatioOfExpressionInducedLinks	SigAfterPureRemoval	SigAfterExpressionInducedRemoval	log10Pvalue_plus1e-20	log10PvalueAfterPureRemoval_plus1e-20	log10PvalueAfterEIremovalplus1e-20	significantCountIn100_randomPureLinkRemoval	significantCountIn100_randomEILinkRemoval_pureCount	significantCountIn100_randomEILinkRemoval
1505	regulation of neurotransmitter levels	67	135	131	56	0.97	0.41	1	1	-20.00	-20.00	-20.00	100	100	100
1508	action potential	27	30	29	20	0.97	0.67	1	1	-20.00	-20.00	-20.00	100	100	100
1558	regulation of cell growth	110	99	81	50	0.82	0.51	1	1	-20.00	-20.00	-6.00	100	100	100
1764	neuron migration	35	46	44	15	0.96	0.33	1	1	-20.00	-20.00	-8.33	100	100	100
2028	regulation of sodium ion transport	30	11	8	9	0.73	0.82	0	0	-6.54	-4.09	-4.87	44	72	6
6470	protein dephosphorylation	73	29	20	22	0.69	0.76	0	0	-6.19	-2.56	-3.25	6	24	0
6633	fatty acid biosynthetic process	27	21	19	14	0.90	0.67	1	1	-20.00	-15.95	-10.58	100	100	99
6644	phospholipid metabolic process	137	120	87	99	0.72	0.82	1	1	-20.00	-12.01	-20.00	100	100	100
6650	glycerophospholipid metabolic process	114	67	48	61	0.72	0.91	0	1	-11.49	-4.55	-9.02	97	100	6
6814	sodium ion transport	36	14	13	4	0.93	0.29	1	0	-7.17	-6.38	-0.95	58	9	7
6816	calcium ion transport	61	45	44	20	0.98	0.44	1	0	-20.00	-20.00	-4.58	100	100	97
6821	chloride transport	24	10	10	0	1.00	0.00	1	0	-7.64	-7.64	-0.17	75	3	19
6835	dicarboxylic acid transport	22	20	20	9	1.00	0.45	1	1	-20.00	-20.00	-7.34	100	100	100
6836	neurotransmitter transport	48	95	93	28	0.98	0.29	1	1	-20.00	-20.00	-13.97	100	100	100
6865	amino acid transport	40	23	23	10	1.00	0.43	1	0	-13.35	-13.35	-3.41	99	98	84
6898	receptor-mediated endocytosis	66	43	42	21	0.98	0.49	1	0	-20.00	-20.00	-4.06	100	100	97
7009	plasma membrane organization	73	69	65	38	0.94	0.55	1	1	-20.00	-20.00	-10.96	100	100	100
7264	small GTPase mediated signal transduction	89	44	40	32	0.91	0.73	1	0	-8.98	-7.17	-4.07	72	91	1
7268	chemical synaptic transmission	109	322	317	103	0.98	0.32	1	1	-20.00	-20.00	-20.00	100	100	100
7269	neurotransmitter secretion	41	75	73	27	0.97	0.36	1	1	-20.00	-20.00	-20.00	100	100	100
7272	ensheathment of neurons	42	78	75	36	0.96	0.46	1	1	-20.00	-20.00	-20.00	100	100	100
7422	peripheral nervous system development	23	9	9	4	1.00	0.44	1	0	-6.97	-6.97	-2.43	52	24	17
7601	visual perception	34	17	15	8	0.88	0.47	1	0	-10.50	-8.69	-3.28	99	90	64
7613	memory	30	14	14	1	1.00	0.07	1	0	-9.30	-9.30	-0.28	93	20	46
7626	locomotory behavior	50	22	22	7	1.00	0.32	1	0	-8.62	-8.62	-0.91	81	13	12
8286	insulin receptor signaling pathway	34	11	9	5	0.82	0.45	0	0	-5.40	-3.95	-1.57	15	0	1
8366	axon ensheathment	42	78	75	36	0.96	0.46	1	1	-20.00	-20.00	-20.00	100	100	100
8654	phospholipid biosynthetic process	87	49	34	45	0.69	0.92	0	1	-12.15	-5.18	-10.08	98	100	18
9566	fertilization	21	7	6	3	0.86	0.43	0	0	-5.58	-4.58	-1.98	23	4	6
10001	glial cell differentiation	63	81	79	42	0.98	0.52	1	1	-20.00	-20.00	-20.00	100	100	100
10506	regulation of autophagy	118	95	45	85	0.47	0.89	0	1	-20.00	-3.08	-20.00	100	100	98
10721	negative regulation of cell development	82	58	57	25	0.98	0.43	1	0	-20.00	-20.00	-2.90	100	100	97
10769	regulation of cell morphogenesis involved in differentiation	78	89	81	77	0.91	0.87	1	1	-20.00	-20.00	-20.00	100	100	100
10821	regulation of mitochondrion organization	81	51	26	38	0.51	0.75	0	1	-15.65	-3.38	-8.42	100	100	80
10822	positive regulation of mitochondrion organization	59	42	21	30	0.50	0.71	1	1	-20.00	-5.52	-10.96	100	100	99
10970	transport along microtubule	43	31	29	22	0.94	0.71	1	1	-20.00	-20.00	-11.17	100	100	99
10975	regulation of neuron projection development	137	293	279	191	0.95	0.65	1	1	-20.00	-20.00	-20.00	100	100	100
10976	positive regulation of neuron projection development	76	94	87	51	0.93	0.54	1	1	-20.00	-20.00	-20.00	100	100	100
10977	negative regulation of neuron projection development	41	22	22	10	1.00	0.45	1	0	-12.01	-12.01	-3.23	99	94	60
14013	regulation of gliogenesis	34	20	20	12	1.00	0.60	1	1	-13.40	-13.40	-6.17	100	100	89
15698	inorganic anion transport	38	13	13	1	1.00	0.08	1	0	-5.82	-5.82	-0.11	8	0	0
15849	organic acid transport	63	43	43	25	1.00	0.58	1	1	-20.00	-20.00	-6.68	100	100	96
16079	synaptic vesicle exocytosis	30	44	43	14	0.98	0.32	1	1	-20.00	-20.00	-9.30	100	100	100
16311	dephosphorylation	111	88	62	76	0.70	0.86	1	1	-20.00	-10.32	-20.00	100	100	97
17156	calcium ion regulated exocytosis	34	56	55	21	0.98	0.38	1	1	-20.00	-20.00	-14.41	100	100	100
18107	peptidyl-threonine phosphorylation	35	14	14	9	1.00	0.64	1	0	-7.49	-7.49	-3.74	53	47	9
18210	peptidyl-threonine modification	36	14	14	9	1.00	0.64	1	0	-7.17	-7.17	-3.55	53	47	9
19932	second-messenger-mediated signaling	36	13	12	6	0.92	0.46	1	0	-6.38	-5.62	-1.84	33	6	0
21537	telencephalon development	71	54	52	25	0.96	0.46	1	0	-20.00	-20.00	-4.82	100	100	100
21543	pallium development	52	31	29	16	0.94	0.52	1	0	-14.57	-13.01	-4.41	100	100	86
21549	cerebellum development	28	9	9	8	1.00	0.89	1	0	-5.40	-5.40	-4.56	20	56	0
21695	cerebellar cortex development	20	7	7	7	1.00	1.00	1	1	-5.90	-5.90	-5.90	29	100	1
21761	limbic system development	34	11	10	4	0.91	0.36	0	0	-5.40	-4.65	-1.11	9	0	2
21766	hippocampus development	27	9	8	3	0.89	0.33	0	0	-5.68	-4.81	-1.27	14	0	3
21782	glial cell development	39	32	31	18	0.97	0.56	1	1	-20.00	-20.00	-9.41	100	100	100
21885	forebrain cell migration	20	16	16	5	1.00	0.31	1	0	-20.00	-20.00	-3.88	100	100	99
21987	cerebral cortex development	35	28	27	14	0.96	0.50	1	1	-20.00	-20.00	-7.49	100	100	100
22898	regulation of transmembrane transporter activity	69	74	71	32	0.96	0.43	1	1	-20.00	-20.00	-8.84	100	100	100
23061	signal release	59	132	130	51	0.98	0.39	1	1	-20.00	-20.00	-20.00	100	100	100
30307	positive regulation of cell growth	49	29	24	7	0.83	0.24	1	0	-14.34	-10.41	-0.98	100	76	83
30308	negative regulation of cell growth	41	14	9	12	0.64	0.86	0	0	-5.74	-2.69	-4.42	11	15	0
30516	regulation of axon extension	21	8	6	8	0.75	1.00	0	1	-6.63	-4.58	-6.63	64	100	17
30534	adult behavior	40	19	18	10	0.95	0.53	1	0	-9.86	-9.05	-3.41	98	90	49
30705	cytoskeleton-dependent intracellular transport	51	37	33	27	0.89	0.73	1	1	-20.00	-20.00	-11.89	100	100	99
31345	negative regulation of cell projection organization	49	28	28	14	1.00	0.50	1	0	-13.52	-13.52	-3.94	100	99	72
31346	positive regulation of cell projection organization	100	120	111	57	0.93	0.47	1	1	-20.00	-20.00	-11.65	100	100	100
32147	activation of protein kinase activity	97	42	33	38	0.79	0.90	0	0	-6.05	-3.07	-4.62	0	65	0
32388	positive regulation of intracellular transport	94	57	35	44	0.61	0.77	0	1	-13.82	-4.18	-7.59	100	100	51
32409	regulation of transporter activity	72	84	80	40	0.95	0.48	1	1	-20.00	-20.00	-12.53	100	100	100
32868	response to insulin	79	33	24	20	0.73	0.61	0	0	-6.58	-3.02	-1.83	19	4	0
32869	cellular response to insulin stimulus	59	24	17	16	0.71	0.67	0	0	-7.19	-3.57	-3.14	38	35	1
33135	regulation of peptidyl-serine phosphorylation	41	19	16	11	0.84	0.58	1	0	-9.49	-7.17	-3.81	88	86	33
33138	positive regulation of peptidyl-serine phosphorylation	30	12	12	6	1.00	0.50	1	0	-7.42	-7.42	-2.68	65	34	19
35637	multicellular organismal signaling	35	22	22	11	1.00	0.50	1	0	-14.88	-14.88	-5.14	100	100	87
35725	sodium ion transmembrane transport	28	11	11	2	1.00	0.18	1	0	-7.19	-7.19	-0.71	70	13	20
40007	growth	127	67	61	38	0.91	0.57	1	0	-7.71	-5.80	-0.90	17	4	0
42063	gliogenesis	75	103	99	54	0.96	0.52	1	1	-20.00	-20.00	-20.00	100	100	100
42391	regulation of membrane potential	107	177	174	65	0.98	0.37	1	1	-20.00	-20.00	-13.00	100	100	100
42552	myelination	40	78	75	36	0.96	0.46	1	1	-20.00	-20.00	-20.00	100	100	100
43112	receptor metabolic process	29	16	12	13	0.75	0.81	1	1	-11.76	-7.77	-8.73	99	100	70
43266	regulation of potassium ion transport	30	16	16	4	1.00	0.25	1	0	-11.28	-11.28	-1.50	99	59	68
43406	positive regulation of MAP kinase activity	72	29	27	21	0.93	0.72	1	0	-6.44	-5.50	-3.05	10	15	0
44708	single-organism behavior	130	199	187	85	0.94	0.43	1	1	-20.00	-20.00	-13.61	100	100	100
45665	negative regulation of neuron differentiation	58	41	41	15	1.00	0.37	1	0	-20.00	-20.00	-2.87	100	100	100
45666	positive regulation of neuron differentiation	98	121	113	69	0.93	0.57	1	1	-20.00	-20.00	-20.00	100	100	100
45927	positive regulation of growth	71	32	27	9	0.84	0.28	1	0	-8.24	-5.72	-0.27	70	1	4
46330	positive regulation of JNK cascade	32	11	11	7	1.00	0.64	1	0	-5.94	-5.94	-3.00	12	2	2
46488	phosphatidylinositol metabolic process	78	36	25	32	0.69	0.89	0	1	-8.29	-3.52	-6.37	64	100	1
46942	carboxylic acid transport	63	43	43	25	1.00	0.58	1	1	-20.00	-20.00	-6.68	100	100	96
48167	regulation of synaptic plasticity	47	22	21	15	0.95	0.68	1	0	-9.65	-8.91	-4.93	96	100	32
48284	organelle fusion	56	21	20	9	0.95	0.43	1	0	-6.26	-5.69	-1.02	15	1	0
48489	synaptic vesicle transport	48	97	94	40	0.97	0.41	1	1	-20.00	-20.00	-20.00	100	100	100
48588	developmental cell growth	30	11	11	7	1.00	0.64	1	0	-6.54	-6.54	-3.36	39	35	5
48589	developmental growth	110	62	57	34	0.92	0.55	1	0	-10.63	-8.57	-1.70	90	63	3
48638	regulation of developmental growth	91	44	39	25	0.89	0.57	1	0	-8.40	-6.26	-1.77	47	23	0
48709	oligodendrocyte differentiation	27	30	30	10	1.00	0.33	1	1	-20.00	-20.00	-6.59	100	100	100
48814	regulation of dendrite morphogenesis	22	17	14	17	0.82	1.00	1	1	-20.00	-13.19	-20.00	100	100	99
50768	negative regulation of neurogenesis	78	58	57	25	0.98	0.43	1	0	-20.00	-20.00	-3.52	100	100	99
50769	positive regulation of neurogenesis	127	160	151	86	0.94	0.54	1	1	-20.00	-20.00	-15.18	100	100	100
50770	regulation of axonogenesis	53	42	38	36	0.90	0.86	1	1	-20.00	-20.00	-20.00	100	100	100
50773	regulation of dendrite development	40	35	30	29	0.86	0.83	1	1	-20.00	-20.00	-20.00	100	100	100
50806	positive regulation of synaptic transmission	34	32	32	22	1.00	0.69	1	1	-20.00	-20.00	-15.48	100	100	100
50808	synapse organization	52	63	63	34	1.00	0.54	1	1	-20.00	-20.00	-20.00	100	100	100
50905	neuromuscular process	21	9	9	3	1.00	0.33	1	0	-7.73	-7.73	-1.98	78	32	30
50953	sensory perception of light stimulus	37	17	15	8	0.88	0.47	1	0	-9.31	-7.65	-2.77	94	79	49
51588	regulation of neurotransmitter transport	22	17	17	10	1.00	0.59	1	1	-20.00	-20.00	-8.43	100	100	100
51648	vesicle localization	93	183	164	93	0.90	0.51	1	1	-20.00	-20.00	-20.00	100	100	100
51650	establishment of vesicle localization	90	183	164	93	0.90	0.51	1	1	-20.00	-20.00	-20.00	100	100	100
51668	localization within membrane	40	29	24	18	0.83	0.62	1	1	-20.00	-14.26	-9.05	100	100	99
51961	negative regulation of nervous system development	88	65	64	26	0.98	0.40	1	0	-20.00	-20.00	-2.37	100	100	98
51962	positive regulation of nervous system development	139	203	194	101	0.96	0.50	1	1	-20.00	-20.00	-20.00	100	100	100
60359	response to ammonium ion	33	19	19	3	1.00	0.16	1	0	-12.89	-12.89	-0.79	100	71	79
60401	cytosolic calcium ion transport	21	9	9	2	1.00	0.22	1	0	-7.73	-7.73	-1.28	75	19	41
61337	cardiac conduction	30	14	14	10	1.00	0.71	1	1	-9.30	-9.30	-5.68	90	100	38
70588	calcium ion transmembrane transport	46	24	24	12	1.00	0.50	1	0	-11.58	-11.58	-3.44	95	95	51
71902	positive regulation of protein serine/threonine kinase activity	95	42	40	23	0.95	0.55	1	0	-6.52	-5.74	-1.02	4	2	0
72384	organelle transport along microtubule	22	18	18	12	1.00	0.67	1	1	-20.00	-20.00	-10.74	100	100	99
72583	clathrin-dependent endocytosis	24	32	31	15	0.97	0.47	1	1	-20.00	-20.00	-13.25	100	100	100
72659	protein localization to plasma membrane	55	45	43	26	0.96	0.58	1	1	-20.00	-20.00	-9.69	100	100	100
97479	synaptic vesicle localization	48	97	94	40	0.97	0.41	1	1	-20.00	-20.00	-20.00	100	100	100
97480	establishment of synaptic vesicle localization	48	97	94	40	0.97	0.41	1	1	-20.00	-20.00	-20.00	100	100	100
98656	anion transmembrane transport	62	33	33	8	1.00	0.24	1	0	-11.85	-11.85	-0.46	100	29	48
98661	inorganic anion transmembrane transport	28	9	9	0	1.00	0.00	1	0	-5.40	-5.40	-0.11	17	0	3
98916	anterograde trans-synaptic signaling	109	322	317	103	0.98	0.32	1	1	-20.00	-20.00	-20.00	100	100	100
99003	vesicle-mediated transport in synapse	49	110	107	48	0.97	0.44	1	1	-20.00	-20.00	-20.00	100	100	100
99111	microtubule-based transport	43	31	29	22	0.94	0.71	1	1	-20.00	-20.00	-11.17	100	100	99
99504	synaptic vesicle cycle	41	80	79	31	0.99	0.39	1	1	-20.00	-20.00	-20.00	100	100	100
99531	presynaptic process involved in chemical synaptic transmission	41	75	73	27	0.97	0.36	1	1	-20.00	-20.00	-20.00	100	100	100
99536	synaptic signaling	110	322	317	103	0.98	0.32	1	1	-20.00	-20.00	-20.00	100	100	100
99537	trans-synaptic signaling	110	322	317	103	0.98	0.32	1	1	-20.00	-20.00	-20.00	100	100	100
99643	signal release from synapse	42	89	87	36	0.98	0.40	1	1	-20.00	-20.00	-20.00	100	100	100
140029	exocytic process	31	19	18	19	0.95	1.00	1	1	-13.91	-12.86	-13.91	100	100	95
1901214	regulation of neuron death	91	73	54	46	0.74	0.63	1	1	-20.00	-13.36	-9.32	100	100	99
1901216	positive regulation of neuron death	26	9	8	4	0.89	0.44	0	0	-5.98	-5.07	-1.98	18	2	2
1901379	regulation of potassium ion transmembrane transport	26	16	16	4	1.00	0.25	1	0	-13.30	-13.30	-1.98	100	80	86
1902305	regulation of sodium ion transmembrane transport	21	8	5	6	0.62	0.75	0	0	-6.63	-3.64	-4.58	65	72	15
1902476	chloride transmembrane transport	21	8	8	0	1.00	0.00	1	0	-6.63	-6.63	-0.24	56	3	14
1903076	regulation of protein localization to plasma membrane	20	8	7	4	0.88	0.50	1	0	-7.00	-5.90	-2.96	59	34	15
1903305	regulation of regulated secretory pathway	28	26	26	15	1.00	0.58	1	1	-20.00	-20.00	-11.18	100	100	100
1903729	regulation of plasma membrane organization	22	8	7	4	0.88	0.50	1	0	-6.28	-5.28	-2.59	59	34	15
1903779	regulation of cardiac conduction	21	12	11	8	0.92	0.67	1	1	-11.26	-10.05	-6.63	100	100	82
1904375	regulation of protein localization to cell periphery	22	8	7	4	0.88	0.50	1	0	-6.28	-5.28	-2.59	59	34	15
1905475	regulation of protein localization to membrane	47	25	16	17	0.64	0.68	1	1	-11.97	-5.53	-6.16	99	100	68
1905477	positive regulation of protein localization to membrane	39	16	10	10	0.62	0.62	0	0	-7.79	-3.60	-3.60	68	67	11
1990138	neuron projection extension	20	7	7	4	1.00	0.57	1	0	-5.90	-5.90	-2.96	24	15	5
1990778	protein localization to cell periphery	62	55	52	34	0.95	0.62	1	1	-20.00	-20.00	-12.53	100	100	100
