# Supplementary material for: Differential coexpression in human tissues and the confounding effect of mean expression levels
Source: Bioinformatics. 2018 Jul 3;35(1):55–61. doi: 10.1093/bioinformatics/bty538 (PMC6298061; doi:10.1093/bioinformatics/bty538)
Supplement: Supplementary Data [file bty538_suppl_data.zip › enrichedTerms_TAN_TSN_table.tsv]

functionID	functionTerm	blood_TAN	blood_TSN	brain_TAN	brainTSN	liver_TAN	liver_TSN	lung_TAN	lung_TSN	muscle_TAN	muscle_TSN
18	regulation of DNA recombination	0	0	0	0	0	0	1	1	0	0
41	transition metal ion transport	0	0	1	0	0	0	0	0	0	0
70	mitotic sister chromatid segregation	0	0	0	0	0	0	1	1	0	0
75	cell cycle checkpoint	0	0	0	0	0	0	1	1	0	0
77	DNA damage checkpoint	0	0	0	0	0	0	1	1	0	0
82	G1/S transition of mitotic cell cycle	0	0	0	0	0	0	1	1	0	0
86	G2/M transition of mitotic cell cycle	0	0	1	1	0	0	1	1	0	0
165	MAPK cascade	1	0	1	0	1	0	1	0	0	0
184	nuclear-transcribed mRNA catabolic process, nonsense-mediated decay	1	0	1	0	1	0	1	0	1	0
209	protein polyubiquitination	1	0	1	0	1	0	1	0	1	0
226	microtubule cytoskeleton organization	0	0	0	0	0	0	1	1	1	0
280	nuclear division	0	0	1	0	1	0	1	1	1	0
302	response to reactive oxygen species	0	0	0	0	0	0	1	0	0	0
375	RNA splicing, via transesterification reactions	1	0	1	0	1	0	1	0	1	0
377	RNA splicing, via transesterification reactions with bulged adenosine as nucleophile	1	0	1	0	1	0	1	0	1	0
398	mRNA splicing, via spliceosome	1	0	1	0	1	0	1	0	1	0
723	telomere maintenance	0	0	0	0	0	0	1	1	0	0
724	double-strand break repair via homologous recombination	0	0	0	0	0	0	1	0	0	0
725	recombinational repair	0	0	0	0	0	0	1	0	0	0
726	non-recombinational repair	0	0	0	0	0	0	1	0	0	0
731	DNA synthesis involved in DNA repair	0	0	0	0	0	0	1	1	0	0
819	sister chromatid segregation	0	0	1	0	1	0	1	1	1	0
956	nuclear-transcribed mRNA catabolic process	1	0	1	0	1	0	1	0	1	0
1101	response to acid chemical	0	0	0	0	1	0	1	0	1	0
1503	ossification	0	0	0	0	1	0	1	1	1	0
1505	regulation of neurotransmitter levels	0	0	1	1	0	0	0	0	0	0
1508	action potential	0	0	1	1	0	0	0	0	0	0
1510	RNA methylation	1	0	0	0	0	0	0	0	0	0
1523	retinoid metabolic process	0	0	0	0	0	1	0	0	0	0
1525	angiogenesis	0	0	0	0	0	0	1	1	1	0
1558	regulation of cell growth	0	0	1	1	0	0	0	0	0	0
1655	urogenital system development	0	0	0	0	0	1	1	1	0	0
1666	response to hypoxia	0	0	1	0	1	0	1	1	0	0
1676	long-chain fatty acid metabolic process	0	0	0	0	1	1	0	0	0	0
1704	formation of primary germ layer	0	0	0	0	0	0	1	1	0	0
1763	morphogenesis of a branching structure	0	0	0	0	0	0	1	1	0	0
1764	neuron migration	0	0	1	1	0	0	0	0	0	0
1816	cytokine production	1	0	0	0	1	0	1	1	0	0
1818	negative regulation of cytokine production	0	0	0	0	1	0	1	0	0	0
1819	positive regulation of cytokine production	1	0	0	0	1	0	1	1	0	0
1822	kidney development	0	0	0	0	0	0	0	1	0	0
1933	negative regulation of protein phosphorylation	0	0	0	0	0	0	1	0	0	0
1936	regulation of endothelial cell proliferation	0	0	0	0	0	0	1	0	0	0
1959	regulation of cytokine-mediated signaling pathway	0	0	0	0	1	0	1	0	0	0
2009	morphogenesis of an epithelium	0	0	0	0	0	0	0	1	0	0
2028	regulation of sodium ion transport	0	0	0	1	0	0	0	0	0	0
2218	activation of innate immune response	1	1	1	0	1	0	1	0	0	0
2220	innate immune response activating cell surface receptor signaling pathway	1	0	1	0	1	0	1	0	1	0
2221	pattern recognition receptor signaling pathway	1	0	0	0	1	0	1	0	0	0
2223	stimulatory C-type lectin receptor signaling pathway	1	0	1	0	1	0	1	0	1	0
2224	toll-like receptor signaling pathway	1	0	0	0	1	0	1	0	0	0
2237	response to molecule of bacterial origin	1	0	0	0	1	0	1	1	0	0
2250	adaptive immune response	1	1	0	0	1	0	1	1	0	0
2285	lymphocyte activation involved in immune response	1	0	0	0	1	0	1	0	0	0
2286	T cell activation involved in immune response	1	0	0	0	0	0	0	0	0	0
2429	immune response-activating cell surface receptor signaling pathway	1	1	1	0	1	0	1	1	1	0
2431	Fc receptor mediated stimulatory signaling pathway	1	0	0	0	1	0	1	0	0	0
2433	immune response-regulating cell surface receptor signaling pathway involved in phagocytosis	1	0	0	0	1	0	1	0	0	0
2449	lymphocyte mediated immunity	0	0	0	0	1	1	1	0	0	0
2460	adaptive immune response based on somatic recombination of immune receptors built from immunoglobulin superfamily domains	0	0	0	0	1	1	1	1	0	0
2474	antigen processing and presentation of peptide antigen via MHC class I	1	0	1	0	1	0	1	0	1	0
2478	antigen processing and presentation of exogenous peptide antigen	1	0	1	1	1	0	1	0	1	0
2479	antigen processing and presentation of exogenous peptide antigen via MHC class I, TAP-dependent	1	0	1	0	1	0	1	0	1	0
2495	antigen processing and presentation of peptide antigen via MHC class II	0	0	1	1	1	0	1	0	0	0
2504	antigen processing and presentation of peptide or polysaccharide antigen via MHC class II	0	0	1	1	1	0	1	0	0	0
2521	leukocyte differentiation	0	0	0	0	1	0	1	1	0	0
2576	platelet degranulation	0	1	0	1	1	1	1	0	0	0
2673	regulation of acute inflammatory response	0	0	0	0	1	1	1	1	0	0
2683	negative regulation of immune system process	0	0	0	0	1	0	1	1	0	0
2685	regulation of leukocyte migration	0	0	0	0	1	0	1	1	0	0
2687	positive regulation of leukocyte migration	0	0	0	0	1	0	1	1	0	0
2688	regulation of leukocyte chemotaxis	0	0	0	0	1	0	1	1	0	0
2690	positive regulation of leukocyte chemotaxis	0	0	0	0	0	0	1	1	0	0
2695	negative regulation of leukocyte activation	0	0	0	0	1	0	1	0	0	0
2696	positive regulation of leukocyte activation	1	1	0	0	1	0	1	0	1	0
2697	regulation of immune effector process	1	1	0	0	1	0	1	1	0	0
2698	negative regulation of immune effector process	0	0	0	0	1	0	1	0	0	0
2699	positive regulation of immune effector process	0	0	0	0	1	0	1	0	0	0
2700	regulation of production of molecular mediator of immune response	0	0	0	0	0	0	1	0	0	0
2702	positive regulation of production of molecular mediator of immune response	0	0	0	0	0	0	1	0	0	0
2703	regulation of leukocyte mediated immunity	1	0	0	0	1	0	1	0	0	0
2705	positive regulation of leukocyte mediated immunity	0	0	0	0	1	0	1	0	0	0
2706	regulation of lymphocyte mediated immunity	0	0	0	0	1	0	1	0	0	0
2708	positive regulation of lymphocyte mediated immunity	0	0	0	0	0	0	1	0	0	0
2709	regulation of T cell mediated immunity	0	0	0	0	0	0	1	0	0	0
2718	regulation of cytokine production involved in immune response	0	0	0	0	1	0	1	0	0	0
2757	immune response-activating signal transduction	1	1	1	0	1	0	1	1	1	0
2758	innate immune response-activating signal transduction	1	0	1	0	1	0	1	0	0	0
2764	immune response-regulating signaling pathway	1	1	1	0	1	0	1	1	1	0
2768	immune response-regulating cell surface receptor signaling pathway	1	1	1	0	1	0	1	1	1	0
2790	peptide secretion	0	0	0	0	1	0	0	0	0	0
2791	regulation of peptide secretion	0	0	0	0	1	0	1	1	0	0
2819	regulation of adaptive immune response	0	0	0	0	1	0	1	0	0	0
2821	positive regulation of adaptive immune response	0	0	0	0	0	0	1	0	0	0
2822	regulation of adaptive immune response based on somatic recombination of immune receptors built from immunoglobulin superfamily domains	0	0	0	0	1	0	1	0	0	0
2824	positive regulation of adaptive immune response based on somatic recombination of immune receptors built from immunoglobulin superfamily domains	0	0	0	0	0	0	1	0	0	0
2831	regulation of response to biotic stimulus	0	0	0	0	0	0	1	0	0	0
2920	regulation of humoral immune response	0	0	0	0	1	1	0	0	0	0
3002	regionalization	0	0	0	0	0	0	0	1	0	0
3007	heart morphogenesis	0	0	0	0	0	0	1	1	0	0
3012	muscle system process	0	0	0	0	1	0	1	1	1	1
3013	circulatory system process	0	0	0	0	0	0	1	1	0	0
3018	vascular process in circulatory system	0	0	0	0	0	0	1	0	0	0
3151	outflow tract morphogenesis	0	0	0	0	0	0	0	0	1	0
3158	endothelium development	0	0	0	0	0	0	1	1	0	0
5975	carbohydrate metabolic process	1	1	0	0	1	1	0	0	0	0
5996	monosaccharide metabolic process	1	1	0	0	1	1	1	0	0	0
6006	glucose metabolic process	0	0	0	0	1	1	0	0	1	1
6026	aminoglycan catabolic process	0	0	0	0	0	0	1	0	0	0
6029	proteoglycan metabolic process	0	0	0	0	0	0	1	0	0	0
6066	alcohol metabolic process	0	0	0	0	1	1	0	0	0	0
6081	cellular aldehyde metabolic process	1	0	1	0	1	1	1	0	0	0
6091	generation of precursor metabolites and energy	1	0	1	1	1	0	1	0	1	0
6119	oxidative phosphorylation	1	0	1	0	1	0	1	0	1	0
6120	mitochondrial electron transport, NADH to ubiquinone	1	0	1	0	1	0	1	0	1	0
6163	purine nucleotide metabolic process	1	0	1	1	1	0	1	0	1	0
6164	purine nucleotide biosynthetic process	1	0	1	1	1	0	1	0	1	0
6260	DNA replication	1	0	0	0	1	0	1	1	0	0
6261	DNA-dependent DNA replication	0	0	0	0	1	0	1	1	0	0
6282	regulation of DNA repair	0	0	0	0	0	0	1	1	0	0
6283	transcription-coupled nucleotide-excision repair	1	0	1	0	1	0	1	0	0	0
6289	nucleotide-excision repair	0	0	1	0	1	0	1	0	1	0
6301	postreplication repair	0	0	0	0	1	0	1	0	0	0
6302	double-strand break repair	0	0	0	0	0	0	1	0	0	0
6303	double-strand break repair via nonhomologous end joining	0	0	0	0	0	0	1	0	0	0
6310	DNA recombination	0	0	0	0	0	0	1	1	0	0
6323	DNA packaging	0	0	0	0	0	0	1	1	0	0
6334	nucleosome assembly	0	0	0	0	0	0	1	0	0	0
6338	chromatin remodeling	0	0	0	0	0	0	1	0	1	0
6353	DNA-templated transcription, termination	1	0	0	0	0	0	1	0	0	0
6354	DNA-templated transcription, elongation	1	0	1	0	0	0	0	0	0	0
6364	rRNA processing	1	0	1	0	1	0	1	0	1	0
6368	transcription elongation from RNA polymerase II promoter	1	0	1	0	0	0	1	0	0	0
6369	termination of RNA polymerase II transcription	1	0	0	0	0	0	1	0	0	0
6399	tRNA metabolic process	1	0	0	0	1	0	1	0	0	0
6401	RNA catabolic process	1	0	1	0	1	0	1	0	1	0
6402	mRNA catabolic process	1	0	1	0	1	0	1	0	1	0
6403	RNA localization	1	0	0	0	1	0	1	0	1	0
6405	RNA export from nucleus	1	0	0	0	1	0	1	0	1	0
6406	mRNA export from nucleus	1	0	0	0	1	0	1	0	1	0
6412	translation	1	0	1	0	1	0	1	0	1	0
6413	translational initiation	1	0	1	0	1	0	1	0	1	0
6414	translational elongation	1	0	1	0	1	0	1	0	1	0
6415	translational termination	1	0	1	0	1	0	1	0	1	0
6417	regulation of translation	1	0	1	0	1	0	1	0	1	0
6418	tRNA aminoacylation for protein translation	1	0	1	0	1	0	1	0	0	0
6457	protein folding	1	0	1	0	1	0	1	0	1	0
6470	protein dephosphorylation	0	0	0	1	0	0	0	0	0	0
6486	protein glycosylation	0	0	0	0	1	0	0	0	0	0
6487	protein N-linked glycosylation	0	0	0	0	1	0	0	0	0	0
6513	protein monoubiquitination	0	0	1	0	0	0	0	0	0	0
6520	cellular amino acid metabolic process	1	0	0	0	1	1	1	0	0	0
6521	regulation of cellular amino acid metabolic process	1	0	1	0	1	0	1	0	1	0
6575	cellular modified amino acid metabolic process	0	0	0	0	1	0	0	0	0	0
6576	cellular biogenic amine metabolic process	0	0	0	0	1	1	0	0	0	0
6605	protein targeting	1	0	1	0	1	0	1	0	1	0
6611	protein export from nucleus	1	0	0	0	1	0	1	0	1	0
6612	protein targeting to membrane	1	0	1	0	1	0	1	0	1	0
6613	cotranslational protein targeting to membrane	1	0	1	0	1	0	1	0	1	0
6626	protein targeting to mitochondrion	0	0	1	0	1	0	1	0	1	0
6631	fatty acid metabolic process	0	0	0	1	1	1	0	0	1	0
6633	fatty acid biosynthetic process	0	0	1	1	0	0	0	0	0	0
6635	fatty acid beta-oxidation	0	0	0	0	1	1	0	0	1	0
6637	acyl-CoA metabolic process	0	0	0	0	1	1	0	0	0	0
6643	membrane lipid metabolic process	1	0	0	0	0	0	1	0	0	0
6644	phospholipid metabolic process	0	0	1	1	0	0	0	0	0	0
6650	glycerophospholipid metabolic process	0	0	1	1	0	0	0	0	0	0
6664	glycolipid metabolic process	0	0	0	0	0	0	1	0	0	0
6665	sphingolipid metabolic process	1	0	0	0	0	0	1	0	0	0
6672	ceramide metabolic process	1	0	0	0	0	0	0	0	0	0
6690	icosanoid metabolic process	0	0	0	0	1	0	1	1	0	0
6694	steroid biosynthetic process	0	0	0	0	1	1	1	0	0	0
6720	isoprenoid metabolic process	0	0	0	0	1	1	0	0	0	0
6721	terpenoid metabolic process	0	0	0	0	1	1	0	0	0	0
6732	coenzyme metabolic process	1	1	1	1	1	1	1	0	0	0
6733	oxidoreduction coenzyme metabolic process	1	1	1	1	1	0	1	0	1	0
6790	sulfur compound metabolic process	0	0	0	0	1	1	0	1	0	0
6805	xenobiotic metabolic process	0	0	0	0	1	1	0	0	0	0
6814	sodium ion transport	0	0	0	1	0	0	0	0	0	0
6816	calcium ion transport	0	0	1	1	0	0	0	0	0	0
6818	hydrogen transport	1	0	1	1	1	0	1	0	1	0
6821	chloride transport	0	0	0	1	0	0	0	0	0	0
6835	dicarboxylic acid transport	0	0	1	1	0	0	0	0	0	0
6836	neurotransmitter transport	0	0	1	1	0	0	0	0	0	0
6839	mitochondrial transport	1	0	1	1	1	0	1	0	1	0
6865	amino acid transport	0	0	1	1	0	0	0	0	0	0
6869	lipid transport	0	0	0	0	1	1	0	0	0	0
6874	cellular calcium ion homeostasis	0	0	0	1	0	0	1	1	0	0
6885	regulation of pH	0	0	1	0	0	0	1	0	0	0
6888	ER to Golgi vesicle-mediated transport	0	0	1	0	1	0	1	0	1	0
6890	retrograde vesicle-mediated transport, Golgi to ER	0	0	1	0	1	0	0	0	0	0
6898	receptor-mediated endocytosis	0	0	1	1	0	0	0	0	0	0
6900	membrane budding	0	0	1	0	1	0	1	0	0	0
6901	vesicle coating	0	0	1	0	1	0	1	0	0	0
6903	vesicle targeting	0	0	0	0	1	0	1	0	0	0
6909	phagocytosis	1	0	0	0	1	0	1	0	0	0
6913	nucleocytoplasmic transport	1	0	0	0	1	0	1	0	1	0
6914	autophagy	0	0	1	0	1	0	0	0	1	0
6936	muscle contraction	0	0	0	0	0	0	1	0	1	1
6954	inflammatory response	1	0	0	0	1	0	1	1	0	0
6956	complement activation	0	0	0	0	1	1	0	0	0	0
6959	humoral immune response	0	0	0	0	1	1	1	0	0	0
6979	response to oxidative stress	0	0	0	0	0	0	1	0	0	0
6986	response to unfolded protein	0	0	0	0	1	0	1	0	0	0
6997	nucleus organization	0	0	1	0	1	0	1	0	0	0
6998	nuclear envelope organization	0	0	0	0	0	0	1	0	0	0
7005	mitochondrion organization	1	0	1	1	1	0	1	0	1	0
7006	mitochondrial membrane organization	1	0	1	1	1	0	0	0	1	0
7009	plasma membrane organization	0	0	1	1	0	0	0	0	0	0
7015	actin filament organization	0	0	0	0	1	0	1	0	1	0
7018	microtubule-based movement	0	0	1	1	0	0	0	1	0	0
7030	Golgi organization	0	0	1	0	0	0	0	0	0	0
7050	cell cycle arrest	0	0	0	0	0	0	0	0	1	0
7051	spindle organization	0	0	1	0	0	0	1	1	0	0
7052	mitotic spindle organization	0	0	0	0	0	0	1	1	0	0
7059	chromosome segregation	1	0	1	0	1	0	1	1	0	0
7062	sister chromatid cohesion	0	0	1	0	1	0	1	1	1	0
7088	regulation of mitotic nuclear division	0	0	1	0	0	0	1	1	0	0
7093	mitotic cell cycle checkpoint	0	0	0	0	0	0	1	1	0	0
7127	meiosis I	0	0	0	0	0	0	1	0	0	0
7156	homophilic cell adhesion via plasma membrane adhesion molecules	0	0	0	0	0	0	0	1	1	0
7162	negative regulation of cell adhesion	0	0	0	0	0	0	1	1	0	0
7163	establishment or maintenance of cell polarity	0	0	1	1	1	0	0	1	1	0
7178	transmembrane receptor protein serine/threonine kinase signaling pathway	0	0	0	0	0	0	1	0	1	0
7179	transforming growth factor beta receptor signaling pathway	0	0	0	0	0	0	1	0	1	0
7204	positive regulation of cytosolic calcium ion concentration	0	0	0	1	0	0	1	1	0	0
7229	integrin-mediated signaling pathway	0	0	0	0	0	0	1	0	0	0
7264	small GTPase mediated signal transduction	0	0	0	1	0	0	0	0	0	0
7268	chemical synaptic transmission	0	0	1	1	0	0	0	0	0	0
7269	neurotransmitter secretion	0	0	1	1	0	0	0	0	0	0
7272	ensheathment of neurons	0	0	1	1	0	0	0	0	0	0
7369	gastrulation	0	0	0	0	0	0	1	0	0	0
7409	axonogenesis	0	0	1	1	0	0	0	1	0	0
7411	axon guidance	0	0	1	1	0	0	0	1	0	0
7422	peripheral nervous system development	0	0	0	1	0	0	0	0	0	0
7492	endoderm development	0	0	0	0	0	0	1	1	0	0
7517	muscle organ development	0	0	0	0	0	0	1	1	0	0
7568	aging	0	0	0	0	0	0	1	0	0	0
7584	response to nutrient	0	0	0	0	0	0	1	0	0	0
7596	blood coagulation	0	0	0	0	1	0	1	0	0	0
7599	hemostasis	0	0	0	0	1	0	1	0	0	0
7601	visual perception	0	0	1	1	0	0	0	0	0	0
7611	learning or memory	1	0	1	1	0	0	0	0	0	0
7613	memory	0	0	0	1	0	0	0	0	0	0
7626	locomotory behavior	0	0	0	1	0	0	0	0	0	0
8015	blood circulation	0	0	0	0	0	0	1	1	0	0
8016	regulation of heart contraction	0	0	1	1	0	0	0	1	0	1
8033	tRNA processing	1	0	0	0	0	0	1	0	0	0
8037	cell recognition	0	0	0	0	1	0	1	0	0	0
8064	regulation of actin polymerization or depolymerization	1	0	0	0	1	0	1	0	0	0
8154	actin polymerization or depolymerization	0	0	0	0	1	0	1	0	0	0
8202	steroid metabolic process	0	0	0	0	1	1	1	0	0	0
8203	cholesterol metabolic process	0	0	0	0	1	0	1	0	0	0
8286	insulin receptor signaling pathway	0	0	0	1	0	0	0	0	0	0
8360	regulation of cell shape	0	0	0	0	0	0	1	0	0	0
8366	axon ensheathment	0	0	1	1	0	0	0	0	0	0
8380	RNA splicing	1	0	1	0	1	0	1	0	1	0
8543	fibroblast growth factor receptor signaling pathway	0	0	0	0	0	0	1	0	0	0
8544	epidermis development	0	0	0	0	0	0	0	1	0	0
8652	cellular amino acid biosynthetic process	0	0	0	0	1	1	0	0	0	0
8654	phospholipid biosynthetic process	0	0	1	1	0	0	0	0	0	0
9060	aerobic respiration	1	0	0	0	1	0	1	0	1	0
9062	fatty acid catabolic process	0	0	0	0	1	1	0	0	1	0
9063	cellular amino acid catabolic process	0	0	0	0	1	1	0	0	1	0
9066	aspartate family amino acid metabolic process	0	0	0	0	1	0	0	0	0	0
9069	serine family amino acid metabolic process	0	0	0	0	1	1	0	0	0	0
9100	glycoprotein metabolic process	0	0	0	0	1	0	0	0	0	0
9108	coenzyme biosynthetic process	0	0	0	0	1	0	0	0	0	0
9123	nucleoside monophosphate metabolic process	1	0	1	0	1	0	1	0	1	0
9124	nucleoside monophosphate biosynthetic process	1	0	1	0	1	0	1	0	1	0
9126	purine nucleoside monophosphate metabolic process	1	0	1	0	1	0	1	0	1	0
9127	purine nucleoside monophosphate biosynthetic process	1	0	1	0	1	0	1	0	1	0
9141	nucleoside triphosphate metabolic process	1	0	1	1	1	0	1	0	1	0
9142	nucleoside triphosphate biosynthetic process	1	0	1	0	1	0	1	0	1	0
9144	purine nucleoside triphosphate metabolic process	1	0	1	1	1	0	1	0	1	0
9150	purine ribonucleotide metabolic process	1	0	1	1	1	0	1	0	1	0
9152	purine ribonucleotide biosynthetic process	1	0	1	1	1	0	1	0	1	0
9156	ribonucleoside monophosphate biosynthetic process	1	0	1	0	1	0	1	0	1	0
9161	ribonucleoside monophosphate metabolic process	1	0	1	0	1	0	1	0	1	0
9163	nucleoside biosynthetic process	0	0	0	0	0	0	1	0	0	0
9165	nucleotide biosynthetic process	1	0	1	1	1	0	1	0	1	0
9167	purine ribonucleoside monophosphate metabolic process	1	0	1	0	1	0	1	0	1	0
9168	purine ribonucleoside monophosphate biosynthetic process	1	0	1	0	1	0	1	0	1	0
9199	ribonucleoside triphosphate metabolic process	1	0	1	1	1	0	1	0	1	0
9205	purine ribonucleoside triphosphate metabolic process	1	0	1	1	1	0	1	0	1	0
9259	ribonucleotide metabolic process	1	0	1	1	1	0	1	0	1	0
9260	ribonucleotide biosynthetic process	1	0	1	1	1	0	1	0	1	0
9306	protein secretion	0	0	0	0	1	0	0	0	0	0
9308	amine metabolic process	0	0	0	0	1	1	0	0	0	0
9314	response to radiation	0	0	0	0	0	0	1	0	1	0
9410	response to xenobiotic stimulus	0	0	0	0	1	1	0	0	0	0
9451	RNA modification	1	0	0	0	0	0	1	0	0	0
9566	fertilization	0	0	1	1	0	0	0	0	0	0
9612	response to mechanical stimulus	0	0	0	1	0	0	1	0	0	0
9615	response to virus	1	0	0	0	1	0	1	0	0	0
9636	response to toxic substance	0	0	0	0	1	1	0	0	0	0
9896	positive regulation of catabolic process	0	0	1	0	1	0	1	0	1	0
9913	epidermal cell differentiation	0	0	0	0	0	0	0	1	0	0
10001	glial cell differentiation	0	0	1	1	0	0	0	0	0	0
10038	response to metal ion	0	0	0	0	1	1	1	0	0	0
10212	response to ionizing radiation	0	0	0	0	0	0	1	1	0	0
10257	NADH dehydrogenase complex assembly	1	0	1	0	1	0	1	0	1	0
10389	regulation of G2/M transition of mitotic cell cycle	0	0	1	0	1	0	1	1	1	0
10466	negative regulation of peptidase activity	0	0	0	0	1	0	0	0	0	0
10498	proteasomal protein catabolic process	1	0	1	1	1	0	1	0	1	0
10506	regulation of autophagy	0	0	1	1	0	0	0	0	0	0
10517	regulation of phospholipase activity	0	0	0	0	0	0	1	0	0	0
10522	regulation of calcium ion transport into cytosol	0	0	0	0	0	0	1	0	0	0
10565	regulation of cellular ketone metabolic process	0	0	1	0	1	0	1	0	0	0
10639	negative regulation of organelle organization	0	0	0	1	0	0	1	1	0	0
10721	negative regulation of cell development	0	0	0	1	0	0	0	0	0	0
10769	regulation of cell morphogenesis involved in differentiation	0	0	1	1	0	0	0	0	0	0
10770	positive regulation of cell morphogenesis involved in differentiation	0	0	1	0	0	0	0	0	0	0
10810	regulation of cell-substrate adhesion	0	0	0	0	1	0	1	1	1	0
10811	positive regulation of cell-substrate adhesion	0	0	0	0	1	0	1	1	1	0
10821	regulation of mitochondrion organization	0	0	1	1	0	0	0	0	0	0
10822	positive regulation of mitochondrion organization	0	0	1	1	0	0	0	0	0	0
10876	lipid localization	0	0	0	0	1	1	0	0	0	0
10927	cellular component assembly involved in morphogenesis	0	0	0	0	0	0	0	0	0	1
10948	negative regulation of cell cycle process	0	0	1	0	1	0	1	1	1	0
10951	negative regulation of endopeptidase activity	0	0	0	0	1	1	0	0	0	0
10952	positive regulation of peptidase activity	0	0	0	0	0	0	1	0	0	0
10959	regulation of metal ion transport	0	0	1	1	0	0	1	1	0	0
10970	transport along microtubule	0	0	1	1	0	0	0	0	0	0
10972	negative regulation of G2/M transition of mitotic cell cycle	1	0	1	0	1	0	1	0	1	0
10975	regulation of neuron projection development	0	0	1	1	0	0	0	0	0	0
10976	positive regulation of neuron projection development	0	0	1	1	0	0	0	0	0	0
10977	negative regulation of neuron projection development	0	0	1	1	0	0	0	0	0	0
14013	regulation of gliogenesis	0	0	0	1	0	0	0	0	0	0
14066	regulation of phosphatidylinositol 3-kinase signaling	0	0	0	0	1	0	1	0	0	0
14074	response to purine-containing compound	0	0	0	0	0	0	0	1	0	0
14706	striated muscle tissue development	0	0	0	0	0	0	1	1	0	0
15672	monovalent inorganic cation transport	1	0	1	1	1	0	1	0	1	0
15698	inorganic anion transport	0	0	0	1	0	0	0	0	0	0
15711	organic anion transport	0	0	0	1	0	0	0	1	0	0
15849	organic acid transport	0	0	0	1	0	0	0	0	0	0
15850	organic hydroxy compound transport	0	0	0	0	1	0	0	1	0	0
15918	sterol transport	0	0	0	0	1	0	0	0	0	0
15931	nucleobase-containing compound transport	1	0	1	0	1	0	1	0	1	0
15980	energy derivation by oxidation of organic compounds	1	0	1	0	1	0	1	0	1	0
15992	proton transport	1	0	1	1	1	0	1	0	1	0
16042	lipid catabolic process	0	0	0	0	1	1	0	0	1	0
16050	vesicle organization	0	0	1	1	1	0	1	0	1	0
16051	carbohydrate biosynthetic process	0	0	0	0	1	1	0	0	0	0
16052	carbohydrate catabolic process	1	1	0	0	1	0	0	0	0	1
16053	organic acid biosynthetic process	0	0	1	1	1	1	0	0	0	0
16054	organic acid catabolic process	0	0	0	0	1	1	1	0	1	0
16055	Wnt signaling pathway	1	0	1	0	1	0	1	0	1	0
16064	immunoglobulin mediated immune response	0	0	0	0	1	1	1	0	0	0
16072	rRNA metabolic process	1	0	1	0	1	0	1	0	1	0
16079	synaptic vesicle exocytosis	0	0	1	1	0	0	0	0	0	0
16101	diterpenoid metabolic process	0	0	0	0	1	1	0	0	0	0
16125	sterol metabolic process	0	0	1	0	1	0	1	0	0	0
16197	endosomal transport	1	0	1	0	1	0	1	0	1	0
16236	macroautophagy	0	0	1	0	1	0	0	0	1	0
16241	regulation of macroautophagy	0	0	1	1	1	0	0	0	0	0
16311	dephosphorylation	0	0	1	1	0	0	0	0	0	0
16337	single organismal cell-cell adhesion	1	0	0	0	1	0	1	1	0	0
16458	gene silencing	0	0	0	0	0	0	1	0	1	0
16482	cytosolic transport	0	0	1	0	0	0	0	0	1	0
16525	negative regulation of angiogenesis	0	0	0	0	0	0	1	0	0	0
16569	covalent chromatin modification	1	0	0	0	0	0	1	0	1	0
16570	histone modification	0	0	0	0	0	0	1	0	1	0
16579	protein deubiquitination	0	0	1	0	1	0	1	0	1	0
16925	protein sumoylation	0	0	0	0	0	0	1	0	0	0
17015	regulation of transforming growth factor beta receptor signaling pathway	0	0	0	0	0	0	0	1	0	0
17038	protein import	0	0	0	0	0	0	1	0	0	0
17148	negative regulation of translation	0	0	0	0	0	0	0	0	1	0
17156	calcium ion regulated exocytosis	0	0	1	1	0	0	0	0	0	0
17157	regulation of exocytosis	1	0	1	1	1	0	1	0	0	0
18107	peptidyl-threonine phosphorylation	0	0	0	1	0	0	0	0	0	0
18108	peptidyl-tyrosine phosphorylation	1	0	0	0	0	0	1	0	0	0
18205	peptidyl-lysine modification	0	0	0	0	0	0	1	0	0	0
18210	peptidyl-threonine modification	0	0	0	1	0	0	0	0	0	0
18212	peptidyl-tyrosine modification	1	0	0	0	0	0	1	0	0	0
19058	viral life cycle	1	0	1	0	1	0	1	1	1	0
19080	viral gene expression	1	0	1	0	1	0	1	0	1	0
19083	viral transcription	1	0	1	0	1	0	1	0	1	0
19216	regulation of lipid metabolic process	0	0	0	0	1	1	0	0	0	0
19218	regulation of steroid metabolic process	0	0	0	0	1	0	1	0	0	0
19221	cytokine-mediated signaling pathway	1	0	1	0	1	0	1	1	0	0
19318	hexose metabolic process	1	0	0	0	1	1	0	0	0	1
19362	pyridine nucleotide metabolic process	1	1	1	1	0	0	1	0	0	1
19395	fatty acid oxidation	0	0	0	0	1	0	0	0	1	0
19439	aromatic compound catabolic process	1	0	0	0	1	1	1	0	1	0
19693	ribose phosphate metabolic process	1	0	1	1	1	0	1	0	1	0
19724	B cell mediated immunity	0	0	0	0	1	1	1	0	0	0
19751	polyol metabolic process	0	1	0	0	0	0	0	0	0	0
19827	stem cell population maintenance	0	0	0	0	0	0	0	0	1	0
19882	antigen processing and presentation	1	0	1	1	1	0	1	0	1	0
19884	antigen processing and presentation of exogenous antigen	1	0	1	1	1	0	1	0	1	0
19886	antigen processing and presentation of exogenous peptide antigen via MHC class II	0	0	1	1	1	0	1	0	0	0
19932	second-messenger-mediated signaling	0	0	0	1	0	0	0	0	0	0
21537	telencephalon development	0	0	0	1	0	0	0	0	0	0
21543	pallium development	0	0	0	1	0	0	0	0	0	0
21549	cerebellum development	0	0	0	1	0	0	0	0	0	0
21695	cerebellar cortex development	0	0	0	1	0	0	0	0	0	0
21761	limbic system development	0	0	0	1	0	0	0	0	0	0
21766	hippocampus development	0	0	0	1	0	0	0	0	0	0
21782	glial cell development	0	0	1	1	0	0	0	0	0	0
21885	forebrain cell migration	0	0	1	1	0	0	0	0	0	0
21987	cerebral cortex development	0	0	1	1	0	0	0	0	0	0
22406	membrane docking	0	0	1	1	1	0	1	0	0	0
22407	regulation of cell-cell adhesion	0	0	0	0	1	0	1	1	1	0
22408	negative regulation of cell-cell adhesion	0	0	0	0	0	0	1	0	0	0
22409	positive regulation of cell-cell adhesion	1	0	0	0	1	0	1	0	1	0
22411	cellular component disassembly	1	0	1	0	1	0	1	1	1	0
22604	regulation of cell morphogenesis	1	0	1	1	1	0	0	0	1	0
22613	ribonucleoprotein complex biogenesis	1	0	1	0	1	0	1	0	1	0
22617	extracellular matrix disassembly	0	0	0	0	1	0	1	0	1	0
22618	ribonucleoprotein complex assembly	1	0	1	0	1	0	1	0	1	0
22898	regulation of transmembrane transporter activity	0	0	1	1	0	0	0	0	0	0
22900	electron transport chain	1	0	1	0	1	0	1	0	1	0
22904	respiratory electron transport chain	1	0	1	0	1	0	1	0	1	0
23014	signal transduction by protein phosphorylation	0	0	1	0	1	0	1	0	1	0
23061	signal release	0	0	1	1	0	0	0	0	0	0
30004	cellular monovalent inorganic cation homeostasis	0	0	1	0	0	0	0	0	0	0
30031	cell projection assembly	0	0	1	1	0	0	0	1	0	0
30036	actin cytoskeleton organization	1	0	0	0	1	0	1	0	1	1
30098	lymphocyte differentiation	0	0	0	0	0	0	1	0	0	0
30100	regulation of endocytosis	0	0	1	1	1	0	1	1	0	0
30111	regulation of Wnt signaling pathway	1	0	1	0	1	0	1	0	0	0
30168	platelet activation	0	0	0	0	1	0	1	0	0	0
30177	positive regulation of Wnt signaling pathway	1	0	1	0	1	0	1	0	0	0
30178	negative regulation of Wnt signaling pathway	1	0	1	0	1	0	1	0	0	0
30193	regulation of blood coagulation	0	0	0	0	1	1	1	0	0	0
30198	extracellular matrix organization	0	0	0	0	1	1	1	1	1	0
30203	glycosaminoglycan metabolic process	0	0	0	0	0	0	1	0	0	0
30216	keratinocyte differentiation	0	0	0	0	0	0	1	1	0	0
30217	T cell differentiation	0	0	0	0	0	0	1	0	0	0
30239	myofibril assembly	0	0	0	0	0	0	0	0	1	1
30258	lipid modification	0	0	0	0	1	0	0	0	1	0
30260	entry into host cell	0	0	0	0	0	0	1	0	0	0
30301	cholesterol transport	0	0	0	0	1	0	0	0	0	0
30307	positive regulation of cell growth	0	0	1	1	0	0	0	0	0	0
30308	negative regulation of cell growth	0	0	0	1	0	0	0	0	0	0
30323	respiratory tube development	0	0	0	0	0	0	0	0	1	0
30335	positive regulation of cell migration	0	0	0	0	0	0	1	1	0	0
30336	negative regulation of cell migration	0	0	0	0	0	0	1	0	0	0
30516	regulation of axon extension	0	0	1	1	0	0	0	0	0	0
30534	adult behavior	0	0	0	1	0	0	0	0	0	0
30574	collagen catabolic process	0	0	0	0	1	1	1	0	1	0
30595	leukocyte chemotaxis	0	0	0	0	1	0	1	1	0	0
30641	regulation of cellular pH	0	0	1	1	0	0	1	0	0	0
30705	cytoskeleton-dependent intracellular transport	0	0	1	1	0	0	0	0	0	0
30799	regulation of cyclic nucleotide metabolic process	0	0	0	0	0	0	1	1	0	0
30832	regulation of actin filament length	1	0	0	0	1	0	1	0	0	0
30833	regulation of actin filament polymerization	1	0	0	0	1	0	1	0	0	0
30838	positive regulation of actin filament polymerization	0	0	0	0	1	0	1	0	0	0
30900	forebrain development	0	0	0	1	0	0	0	1	0	0
30968	endoplasmic reticulum unfolded protein response	0	0	0	0	1	0	1	0	0	0
31032	actomyosin structure organization	0	0	0	0	0	0	0	0	1	1
31123	RNA 3'-end processing	1	0	0	0	1	0	1	0	1	0
31124	mRNA 3'-end processing	1	0	0	0	1	0	1	0	1	0
31145	anaphase-promoting complex-dependent catabolic process	1	0	1	0	1	0	1	0	1	0
31146	SCF-dependent proteasomal ubiquitin-dependent protein catabolic process	1	0	1	0	1	0	1	0	1	0
31294	lymphocyte costimulation	0	0	0	0	1	0	1	0	0	0
31295	T cell costimulation	0	0	0	0	1	0	1	0	0	0
31331	positive regulation of cellular catabolic process	0	0	1	0	1	0	1	0	1	0
31334	positive regulation of protein complex assembly	0	0	1	0	1	0	1	0	0	0
31345	negative regulation of cell projection organization	0	0	1	1	0	0	0	0	0	0
31346	positive regulation of cell projection organization	0	0	1	1	0	0	0	0	0	0
31348	negative regulation of defense response	0	0	0	0	1	0	1	0	0	0
31349	positive regulation of defense response	1	0	1	0	1	0	1	1	0	0
31396	regulation of protein ubiquitination	1	0	1	0	1	0	1	1	1	0
31397	negative regulation of protein ubiquitination	1	0	1	0	1	0	1	0	0	0
31398	positive regulation of protein ubiquitination	1	0	1	0	1	0	1	1	1	0
31503	protein complex localization	0	0	0	0	0	0	1	0	0	0
31570	DNA integrity checkpoint	0	0	0	0	0	0	1	1	0	0
31589	cell-substrate adhesion	0	0	0	0	0	0	1	1	0	0
31647	regulation of protein stability	1	0	1	0	0	0	1	0	1	0
31960	response to corticosteroid	0	0	0	0	0	0	1	0	0	0
32102	negative regulation of response to external stimulus	0	0	0	0	0	0	0	1	0	0
32103	positive regulation of response to external stimulus	0	0	0	0	1	0	1	1	0	0
32147	activation of protein kinase activity	0	0	0	1	0	0	0	0	0	0
32200	telomere organization	0	0	0	0	0	0	1	1	0	0
32204	regulation of telomere maintenance	0	0	0	0	0	0	0	0	1	0
32259	methylation	1	0	0	0	0	0	1	0	0	0
32271	regulation of protein polymerization	1	0	0	0	1	0	1	0	0	0
32273	positive regulation of protein polymerization	1	0	0	0	1	0	1	0	0	0
32388	positive regulation of intracellular transport	0	0	1	1	0	0	0	0	0	0
32392	DNA geometric change	0	0	0	0	0	0	1	0	1	0
32409	regulation of transporter activity	0	0	1	1	0	0	0	0	0	0
32412	regulation of ion transmembrane transporter activity	0	0	1	1	0	0	0	0	0	1
32434	regulation of proteasomal ubiquitin-dependent protein catabolic process	0	0	0	0	1	0	0	0	1	0
32479	regulation of type I interferon production	0	0	0	0	0	0	1	0	0	0
32481	positive regulation of type I interferon production	0	0	0	0	0	0	1	0	0	0
32496	response to lipopolysaccharide	1	0	0	0	1	0	1	1	0	0
32508	DNA duplex unwinding	0	0	0	0	0	0	1	0	0	0
32535	regulation of cellular component size	1	0	0	0	1	0	1	0	1	0
32543	mitochondrial translation	1	0	1	0	1	0	1	0	1	0
32649	regulation of interferon-gamma production	0	0	0	0	1	0	1	1	0	0
32675	regulation of interleukin-6 production	0	0	0	0	0	0	1	0	0	0
32680	regulation of tumor necrosis factor production	0	0	0	0	1	0	1	1	0	0
32729	positive regulation of interferon-gamma production	0	0	0	0	1	0	1	1	0	0
32835	glomerulus development	0	0	0	0	0	0	1	1	0	0
32868	response to insulin	0	0	0	1	0	0	0	0	0	0
32869	cellular response to insulin stimulus	0	0	0	1	0	0	0	0	0	0
32872	regulation of stress-activated MAPK cascade	0	0	0	0	0	0	1	0	0	0
32886	regulation of microtubule-based process	0	0	1	1	0	0	1	1	0	0
32943	mononuclear cell proliferation	1	0	0	0	0	0	0	0	0	0
32944	regulation of mononuclear cell proliferation	0	0	0	0	1	0	1	0	0	0
32945	negative regulation of mononuclear cell proliferation	0	0	0	0	1	0	1	0	0	0
32946	positive regulation of mononuclear cell proliferation	0	0	0	0	1	0	1	0	0	0
32956	regulation of actin cytoskeleton organization	1	0	0	0	1	0	1	1	1	0
32963	collagen metabolic process	0	0	0	0	1	1	1	0	1	0
32970	regulation of actin filament-based process	1	0	0	0	1	0	1	1	1	0
32981	mitochondrial respiratory chain complex I assembly	1	0	1	0	1	0	1	0	1	0
32984	macromolecular complex disassembly	1	0	1	0	1	0	1	0	1	0
33044	regulation of chromosome organization	0	0	1	0	0	0	1	1	1	0
33108	mitochondrial respiratory chain complex assembly	1	0	1	0	1	0	1	0	1	0
33135	regulation of peptidyl-serine phosphorylation	0	0	0	1	0	0	0	0	0	0
33138	positive regulation of peptidyl-serine phosphorylation	0	0	0	1	0	0	0	0	0	0
33209	tumor necrosis factor-mediated signaling pathway	1	0	1	0	1	0	1	0	1	0
33238	regulation of cellular amine metabolic process	1	0	1	1	1	0	1	0	1	0
33628	regulation of cell adhesion mediated by integrin	0	0	0	0	1	0	1	0	0	0
33683	nucleotide-excision repair, DNA incision	0	0	1	0	0	0	1	0	0	0
34248	regulation of cellular amide metabolic process	1	0	0	0	1	0	1	0	1	0
34249	negative regulation of cellular amide metabolic process	0	0	0	0	0	0	0	0	1	0
34250	positive regulation of cellular amide metabolic process	1	0	0	0	1	0	1	0	0	0
34330	cell junction organization	0	0	0	0	0	0	1	1	0	0
34340	response to type I interferon	1	0	0	0	1	0	1	0	0	0
34341	response to interferon-gamma	1	0	0	0	1	0	1	0	1	0
34440	lipid oxidation	0	0	0	0	1	0	0	0	1	0
34470	ncRNA processing	1	0	0	0	1	0	1	0	1	0
34612	response to tumor necrosis factor	1	0	1	0	1	0	1	0	0	0
34620	cellular response to unfolded protein	0	0	0	0	1	0	1	0	0	0
34655	nucleobase-containing compound catabolic process	1	0	0	0	1	0	1	0	1	0
34754	cellular hormone metabolic process	0	0	0	0	1	1	0	0	0	0
34762	regulation of transmembrane transport	0	0	1	1	0	0	0	1	0	0
34763	negative regulation of transmembrane transport	0	0	1	0	0	0	0	0	0	0
34765	regulation of ion transmembrane transport	0	0	1	1	0	0	0	1	0	0
34976	response to endoplasmic reticulum stress	0	0	1	0	1	0	1	0	1	0
35051	cardiocyte differentiation	0	0	0	0	0	0	0	1	0	0
35239	tube morphogenesis	0	0	0	0	0	0	0	1	0	0
35383	thioester metabolic process	0	0	0	0	1	1	0	0	0	0
35567	non-canonical Wnt signaling pathway	1	0	1	0	1	0	1	0	1	0
35637	multicellular organismal signaling	0	0	0	1	0	0	0	0	0	0
35725	sodium ion transmembrane transport	0	0	0	1	0	0	0	0	0	0
35966	response to topologically incorrect protein	0	0	0	0	1	0	1	0	0	0
35967	cellular response to topologically incorrect protein	0	0	0	0	1	0	1	0	0	0
36293	response to decreased oxygen levels	0	0	1	0	1	0	1	1	0	0
36294	cellular response to decreased oxygen levels	1	0	1	0	1	0	1	0	0	0
36498	IRE1-mediated unfolded protein response	0	0	0	0	1	0	0	0	0	0
38061	NIK/NF-kappaB signaling	1	0	1	0	1	0	1	0	1	0
38093	Fc receptor signaling pathway	1	0	1	0	1	0	1	0	0	0
38094	Fc-gamma receptor signaling pathway	1	0	0	0	1	0	1	0	0	0
38095	Fc-epsilon receptor signaling pathway	1	0	1	0	1	0	1	0	0	0
38096	Fc-gamma receptor signaling pathway involved in phagocytosis	1	0	0	0	1	0	1	0	0	0
38127	ERBB signaling pathway	0	0	0	0	1	0	0	0	0	0
40007	growth	0	0	0	1	0	0	0	0	0	0
40029	regulation of gene expression, epigenetic	0	0	0	0	0	0	1	1	1	0
42035	regulation of cytokine biosynthetic process	0	0	0	0	0	0	1	0	0	0
42060	wound healing	0	0	0	0	1	0	1	1	1	0
42063	gliogenesis	0	0	1	1	0	0	0	0	0	0
42102	positive regulation of T cell proliferation	0	0	0	0	1	0	1	0	0	0
42110	T cell activation	1	0	0	0	1	0	1	1	0	0
42113	B cell activation	1	0	0	0	0	0	1	0	0	0
42129	regulation of T cell proliferation	0	0	0	0	1	0	1	0	0	0
42176	regulation of protein catabolic process	1	0	1	0	1	0	1	0	1	0
42180	cellular ketone metabolic process	0	0	0	0	1	1	0	0	0	0
42254	ribosome biogenesis	1	0	1	0	1	0	1	0	1	0
42274	ribosomal small subunit biogenesis	1	0	0	0	1	0	1	0	0	0
42307	positive regulation of protein import into nucleus	0	1	0	0	0	0	0	0	0	0
42391	regulation of membrane potential	0	0	1	1	0	0	0	0	0	0
42445	hormone metabolic process	0	0	0	0	1	1	0	0	0	0
42476	odontogenesis	0	0	0	0	1	0	0	0	0	0
42493	response to drug	0	0	0	0	0	1	0	0	0	0
42542	response to hydrogen peroxide	0	0	0	0	0	0	1	0	0	0
42552	myelination	0	0	1	1	0	0	0	0	0	0
42590	antigen processing and presentation of exogenous peptide antigen via MHC class I	1	0	1	0	1	0	1	0	1	0
42692	muscle cell differentiation	0	0	0	0	0	0	0	1	0	1
42742	defense response to bacterium	1	0	0	0	1	0	1	0	0	0
42773	ATP synthesis coupled electron transport	1	0	1	0	1	0	1	0	1	0
42775	mitochondrial ATP synthesis coupled electron transport	1	0	1	0	1	0	1	0	1	0
42787	protein ubiquitination involved in ubiquitin-dependent protein catabolic process	0	0	1	0	0	0	0	0	0	0
42795	snRNA transcription from RNA polymerase II promoter	0	0	1	0	0	0	0	0	0	0
43038	amino acid activation	1	0	1	0	1	0	1	0	0	0
43039	tRNA aminoacylation	1	0	1	0	1	0	1	0	0	0
43043	peptide biosynthetic process	1	0	1	0	1	0	1	0	1	0
43062	extracellular structure organization	0	0	0	0	1	1	1	1	1	0
43112	receptor metabolic process	0	0	1	1	0	0	0	0	0	0
43161	proteasome-mediated ubiquitin-dependent protein catabolic process	1	0	1	1	1	0	1	0	1	0
43200	response to amino acid	0	0	0	0	1	1	1	0	1	0
43241	protein complex disassembly	1	0	1	0	1	0	1	0	1	0
43254	regulation of protein complex assembly	0	0	0	0	1	0	1	0	1	0
43266	regulation of potassium ion transport	0	0	0	1	0	0	0	0	0	0
43270	positive regulation of ion transport	0	0	0	1	0	0	1	1	0	0
43405	regulation of MAP kinase activity	1	0	0	0	0	0	1	0	0	0
43406	positive regulation of MAP kinase activity	0	0	0	1	0	0	0	0	0	0
43413	macromolecule glycosylation	0	0	0	0	1	0	0	0	0	0
43414	macromolecule methylation	1	0	0	0	0	0	1	0	0	0
43484	regulation of RNA splicing	1	0	0	0	1	0	1	0	1	0
43487	regulation of RNA stability	1	0	1	0	1	0	1	0	1	0
43488	regulation of mRNA stability	1	0	1	0	1	0	1	0	1	0
43523	regulation of neuron apoptotic process	0	0	1	1	0	0	1	0	0	0
43524	negative regulation of neuron apoptotic process	0	0	1	1	0	0	1	0	0	0
43588	skin development	0	0	0	0	0	0	0	1	0	0
43604	amide biosynthetic process	1	0	1	0	1	0	1	0	1	0
43618	regulation of transcription from RNA polymerase II promoter in response to stress	1	0	1	0	1	0	1	0	0	0
43620	regulation of DNA-templated transcription in response to stress	1	0	1	0	1	0	1	0	0	0
43623	cellular protein complex assembly	1	0	1	1	1	0	1	0	1	0
43624	cellular protein complex disassembly	1	0	1	0	1	0	1	0	1	0
43648	dicarboxylic acid metabolic process	0	0	1	0	1	1	0	0	0	0
43687	post-translational protein modification	1	0	1	1	1	0	1	0	1	0
43900	regulation of multi-organism process	0	0	0	0	1	0	1	1	0	0
43901	negative regulation of multi-organism process	1	0	0	0	1	0	1	0	0	0
43902	positive regulation of multi-organism process	0	0	0	0	0	0	0	1	0	0
43903	regulation of symbiosis, encompassing mutualism through parasitism	1	0	0	0	1	0	1	0	0	0
44089	positive regulation of cellular component biogenesis	1	0	0	0	1	0	1	0	1	0
44106	cellular amine metabolic process	0	0	0	0	1	1	0	0	0	0
44236	multicellular organism metabolic process	0	0	0	0	1	1	1	0	1	0
44242	cellular lipid catabolic process	1	0	0	0	1	1	0	0	1	0
44243	multicellular organismal catabolic process	0	0	0	0	1	1	1	0	1	0
44259	multicellular organismal macromolecule metabolic process	0	0	0	0	1	1	1	0	1	0
44262	cellular carbohydrate metabolic process	1	1	0	0	1	1	0	0	0	0
44270	cellular nitrogen compound catabolic process	1	0	0	0	1	0	1	0	1	0
44272	sulfur compound biosynthetic process	0	0	0	0	1	0	0	0	0	0
44282	small molecule catabolic process	1	0	1	0	1	1	1	0	1	0
44283	small molecule biosynthetic process	0	0	1	1	1	1	1	0	0	0
44344	cellular response to fibroblast growth factor stimulus	0	0	0	0	0	0	1	0	0	0
44409	entry into host	0	0	0	0	0	0	1	0	0	0
44708	single-organism behavior	0	0	1	1	0	0	0	0	0	0
44723	single-organism carbohydrate metabolic process	1	1	0	0	1	1	0	0	0	1
44724	single-organism carbohydrate catabolic process	1	0	0	0	1	0	0	0	0	1
44743	protein transmembrane import into intracellular organelle	0	0	0	0	0	0	1	0	0	0
44766	multi-organism transport	1	0	0	0	1	0	1	0	1	0
44770	cell cycle phase transition	0	0	1	0	1	0	1	1	1	0
44772	mitotic cell cycle phase transition	0	0	1	0	1	0	1	1	1	0
44773	mitotic DNA damage checkpoint	0	0	0	0	0	0	1	0	0	0
44774	mitotic DNA integrity checkpoint	0	0	0	0	0	0	1	0	0	0
44782	cilium organization	0	0	1	1	0	0	1	1	0	0
44839	cell cycle G2/M phase transition	0	0	1	1	0	0	1	1	0	0
44843	cell cycle G1/S phase transition	0	0	0	0	0	0	1	1	0	0
45017	glycerolipid biosynthetic process	0	0	1	0	0	0	0	0	0	0
45047	protein targeting to ER	1	0	1	0	1	0	1	0	1	0
45069	regulation of viral genome replication	1	0	0	0	1	0	1	0	0	0
45088	regulation of innate immune response	1	0	1	0	1	0	1	0	0	0
45089	positive regulation of innate immune response	1	1	1	0	1	0	1	0	0	0
45216	cell-cell junction organization	0	0	0	0	0	0	1	1	0	0
45333	cellular respiration	1	0	1	0	1	0	1	0	1	0
45454	cell redox homeostasis	0	0	1	0	1	0	1	0	0	0
45471	response to ethanol	0	0	0	0	1	1	0	0	0	0
45540	regulation of cholesterol biosynthetic process	0	0	0	0	0	0	1	0	0	0
45580	regulation of T cell differentiation	0	0	0	0	0	0	1	0	0	0
45619	regulation of lymphocyte differentiation	0	0	0	0	0	0	1	0	0	0
45621	positive regulation of lymphocyte differentiation	0	0	0	0	0	0	1	0	0	0
45637	regulation of myeloid cell differentiation	0	0	0	0	1	0	0	0	0	0
45665	negative regulation of neuron differentiation	0	0	1	1	0	0	0	0	0	0
45666	positive regulation of neuron differentiation	0	0	1	1	0	0	0	0	0	0
45727	positive regulation of translation	1	0	0	0	1	0	1	0	0	0
45732	positive regulation of protein catabolic process	1	0	1	0	1	0	1	1	1	0
45765	regulation of angiogenesis	0	0	0	0	0	0	1	1	0	0
45766	positive regulation of angiogenesis	0	0	0	0	0	0	1	1	0	0
45785	positive regulation of cell adhesion	0	1	0	0	1	0	1	1	1	0
45787	positive regulation of cell cycle	0	0	0	0	0	0	1	1	0	0
45807	positive regulation of endocytosis	0	0	0	0	0	0	1	1	0	0
45861	negative regulation of proteolysis	0	0	0	0	1	0	0	0	0	0
45862	positive regulation of proteolysis	1	0	1	0	1	0	1	1	1	0
45921	positive regulation of exocytosis	0	0	1	1	0	0	1	0	0	0
45927	positive regulation of growth	0	0	0	1	0	0	0	0	0	0
45930	negative regulation of mitotic cell cycle	0	0	1	0	1	0	1	1	1	0
45931	positive regulation of mitotic cell cycle	0	0	1	0	0	0	1	0	1	0
46034	ATP metabolic process	1	0	1	0	1	0	1	0	1	0
46165	alcohol biosynthetic process	0	0	1	0	1	0	1	0	0	0
46330	positive regulation of JNK cascade	0	0	0	1	0	0	0	0	0	0
46390	ribose phosphate biosynthetic process	1	0	1	1	1	0	1	0	1	0
46394	carboxylic acid biosynthetic process	0	0	1	1	1	1	0	0	0	0
46395	carboxylic acid catabolic process	0	0	0	0	1	1	1	0	1	0
46474	glycerophospholipid biosynthetic process	0	0	1	0	0	0	0	0	0	0
46486	glycerolipid metabolic process	0	0	0	1	0	0	0	1	0	0
46488	phosphatidylinositol metabolic process	0	0	0	1	0	0	0	0	0	0
46496	nicotinamide nucleotide metabolic process	1	1	1	1	0	0	1	0	0	1
46578	regulation of Ras protein signal transduction	0	1	0	0	0	0	1	0	0	0
46631	alpha-beta T cell activation	0	0	0	0	1	0	1	0	0	0
46634	regulation of alpha-beta T cell activation	0	0	0	0	0	0	1	0	0	0
46649	lymphocyte activation	1	1	0	0	1	0	1	1	0	0
46683	response to organophosphorus	0	0	0	0	0	0	0	1	0	0
46700	heterocycle catabolic process	1	0	0	0	1	0	1	0	1	0
46718	viral entry into host cell	0	0	0	0	0	0	1	0	0	0
46777	protein autophosphorylation	1	1	0	0	0	0	0	0	0	0
46794	transport of virus	1	0	1	0	1	0	1	0	1	0
46824	positive regulation of nucleocytoplasmic transport	1	0	0	0	0	0	0	0	0	0
46883	regulation of hormone secretion	0	0	0	0	0	1	0	0	0	0
46890	regulation of lipid biosynthetic process	0	0	0	0	1	0	0	0	0	0
46942	carboxylic acid transport	0	0	0	1	0	0	0	0	0	0
48002	antigen processing and presentation of peptide antigen	1	0	1	1	1	0	1	0	1	0
48010	vascular endothelial growth factor receptor signaling pathway	0	0	0	0	0	0	1	0	0	0
48013	ephrin receptor signaling pathway	0	0	0	0	0	0	0	0	1	0
48024	regulation of mRNA splicing, via spliceosome	0	0	0	0	1	0	1	0	1	0
48167	regulation of synaptic plasticity	0	0	1	1	0	0	0	0	0	0
48193	Golgi vesicle transport	1	0	1	1	1	0	1	0	1	0
48199	vesicle targeting, to, from or within Golgi	0	0	1	0	1	0	1	0	0	0
48207	vesicle targeting, rough ER to cis-Golgi	0	0	1	0	1	0	1	0	0	0
48208	COPII vesicle coating	0	0	1	0	1	0	1	0	0	0
48259	regulation of receptor-mediated endocytosis	0	0	1	1	1	0	0	0	1	0
48278	vesicle docking	0	0	1	0	1	0	1	0	0	0
48284	organelle fusion	0	0	0	1	0	0	0	0	0	0
48285	organelle fission	0	0	1	0	1	0	1	1	1	0
48489	synaptic vesicle transport	0	0	1	1	0	0	0	0	0	0
48514	blood vessel morphogenesis	0	0	0	0	0	0	1	1	1	0
48525	negative regulation of viral process	1	0	0	0	1	0	1	0	0	0
48545	response to steroid hormone	0	0	0	0	1	1	1	0	0	0
48562	embryonic organ morphogenesis	0	0	0	0	0	0	0	1	0	0
48568	embryonic organ development	0	0	0	0	0	0	0	1	0	0
48588	developmental cell growth	0	0	0	1	0	0	0	0	0	0
48589	developmental growth	0	0	0	1	0	0	0	0	0	0
48608	reproductive structure development	0	0	0	0	0	0	0	1	0	0
48638	regulation of developmental growth	0	0	0	1	0	0	0	0	0	0
48660	regulation of smooth muscle cell proliferation	0	0	0	0	0	0	1	0	0	0
48667	cell morphogenesis involved in neuron differentiation	0	0	1	1	0	0	0	1	0	0
48705	skeletal system morphogenesis	0	0	0	0	0	0	1	1	0	0
48706	embryonic skeletal system development	0	0	0	0	0	0	1	1	0	0
48709	oligodendrocyte differentiation	0	0	1	1	0	0	0	0	0	0
48738	cardiac muscle tissue development	0	0	0	0	0	0	0	1	0	0
48754	branching morphogenesis of an epithelial tube	0	0	0	0	0	0	0	1	0	0
48771	tissue remodeling	0	0	0	0	1	0	1	0	0	0
48814	regulation of dendrite morphogenesis	0	0	1	1	0	0	0	0	0	0
48844	artery morphogenesis	0	0	0	0	0	0	1	1	0	0
48871	multicellular organismal homeostasis	0	0	0	0	0	0	1	0	0	0
48872	homeostasis of number of cells	0	0	0	0	1	0	1	0	0	0
50000	chromosome localization	0	0	1	0	0	0	1	1	0	0
50657	nucleic acid transport	1	0	0	0	1	0	1	0	1	0
50658	RNA transport	1	0	0	0	1	0	1	0	1	0
50670	regulation of lymphocyte proliferation	0	0	0	0	1	0	1	0	0	0
50671	positive regulation of lymphocyte proliferation	0	0	0	0	1	0	1	0	0	0
50672	negative regulation of lymphocyte proliferation	0	0	0	0	1	0	1	0	0	0
50678	regulation of epithelial cell proliferation	0	0	0	0	0	0	0	1	0	0
50684	regulation of mRNA processing	1	0	0	0	0	0	1	0	1	0
50707	regulation of cytokine secretion	1	1	0	0	1	0	1	1	0	0
50708	regulation of protein secretion	0	0	0	0	1	0	1	1	0	0
50727	regulation of inflammatory response	1	0	0	0	1	0	1	1	0	0
50729	positive regulation of inflammatory response	0	0	0	0	0	0	1	0	0	0
50730	regulation of peptidyl-tyrosine phosphorylation	0	0	0	0	0	0	1	0	0	0
50764	regulation of phagocytosis	1	0	0	0	1	0	1	0	0	0
50768	negative regulation of neurogenesis	0	0	0	1	0	0	0	0	0	0
50769	positive regulation of neurogenesis	0	0	1	1	0	0	0	0	0	0
50770	regulation of axonogenesis	0	0	1	1	0	0	0	0	0	0
50773	regulation of dendrite development	0	0	1	1	0	0	0	0	0	0
50777	negative regulation of immune response	0	0	0	0	1	0	1	0	0	0
50792	regulation of viral process	1	0	0	0	1	0	1	0	0	0
50796	regulation of insulin secretion	0	0	0	0	0	1	0	0	0	0
50804	modulation of synaptic transmission	1	0	1	1	0	0	0	0	0	0
50806	positive regulation of synaptic transmission	0	0	1	1	0	0	0	0	0	0
50808	synapse organization	0	0	1	1	0	0	0	0	0	0
50810	regulation of steroid biosynthetic process	0	0	0	0	1	0	1	0	0	0
50817	coagulation	0	0	0	0	1	0	1	0	0	0
50818	regulation of coagulation	1	0	0	0	1	1	1	0	0	0
50821	protein stabilization	0	0	1	0	0	0	1	0	0	0
50851	antigen receptor-mediated signaling pathway	1	0	1	0	1	0	1	1	0	0
50852	T cell receptor signaling pathway	1	0	1	0	1	0	1	1	0	0
50863	regulation of T cell activation	0	0	0	0	1	0	1	1	1	0
50864	regulation of B cell activation	1	0	0	0	1	0	1	0	0	0
50866	negative regulation of cell activation	0	0	0	0	1	0	1	0	0	0
50867	positive regulation of cell activation	1	1	0	0	1	0	1	0	1	0
50868	negative regulation of T cell activation	0	0	0	0	0	0	1	0	0	0
50870	positive regulation of T cell activation	0	0	0	0	1	0	1	0	0	0
50871	positive regulation of B cell activation	0	0	0	0	0	0	1	0	0	0
50890	cognition	1	0	1	1	0	0	0	0	0	0
50900	leukocyte migration	1	0	0	0	1	0	1	1	0	0
50905	neuromuscular process	0	0	0	1	0	0	0	0	0	0
50920	regulation of chemotaxis	0	0	0	0	1	0	1	1	0	0
50921	positive regulation of chemotaxis	0	0	0	0	0	0	1	1	0	0
50953	sensory perception of light stimulus	0	0	0	1	0	0	0	0	0	0
51028	mRNA transport	1	0	0	0	1	0	1	0	1	0
51047	positive regulation of secretion	0	0	1	1	1	0	1	0	0	0
51052	regulation of DNA metabolic process	1	0	0	0	0	0	1	1	1	0
51054	positive regulation of DNA metabolic process	1	0	0	0	0	0	1	1	0	0
51056	regulation of small GTPase mediated signal transduction	0	0	0	0	1	0	1	0	0	0
51090	regulation of sequence-specific DNA binding transcription factor activity	0	0	0	0	0	0	1	0	0	0
51092	positive regulation of NF-kappaB transcription factor activity	0	0	0	0	0	0	1	0	0	0
51146	striated muscle cell differentiation	0	0	0	0	0	0	0	0	0	1
51168	nuclear export	1	0	0	0	1	0	1	0	1	0
51169	nuclear transport	1	0	0	0	1	0	1	0	1	0
51170	nuclear import	0	0	0	0	0	0	1	0	0	0
51186	cofactor metabolic process	1	1	1	1	1	1	1	0	0	0
51188	cofactor biosynthetic process	0	0	0	0	1	0	0	0	1	0
51216	cartilage development	0	0	0	0	0	0	0	1	0	0
51222	positive regulation of protein transport	0	0	1	1	0	0	1	0	0	0
51236	establishment of RNA localization	1	0	0	0	1	0	1	0	1	0
51249	regulation of lymphocyte activation	0	0	0	0	1	0	1	1	1	0
51250	negative regulation of lymphocyte activation	0	0	0	0	1	0	1	0	0	0
51251	positive regulation of lymphocyte activation	1	1	0	0	1	0	1	0	1	0
51258	protein polymerization	0	0	1	0	1	0	0	0	0	0
51259	protein oligomerization	0	1	0	0	1	1	0	0	1	0
51260	protein homooligomerization	0	0	0	0	0	1	0	0	0	0
51262	protein tetramerization	0	0	0	0	1	1	0	0	0	0
51272	positive regulation of cellular component movement	0	0	0	0	0	0	1	1	0	0
51289	protein homotetramerization	0	0	0	0	0	1	0	0	0	0
51301	cell division	0	0	1	0	1	0	1	1	1	0
51303	establishment of chromosome localization	0	0	1	0	0	0	1	1	0	0
51310	metaphase plate congression	0	0	0	0	0	0	1	1	0	0
51321	meiotic cell cycle	0	0	0	0	0	0	1	0	0	0
51346	negative regulation of hydrolase activity	0	0	0	0	1	0	0	0	0	0
51348	negative regulation of transferase activity	1	0	0	0	1	0	0	0	0	0
51384	response to glucocorticoid	0	0	0	0	0	0	1	0	0	0
51436	negative regulation of ubiquitin-protein ligase activity involved in mitotic cell cycle	1	0	0	0	1	0	1	0	0	0
51437	positive regulation of ubiquitin-protein ligase activity involved in regulation of mitotic cell cycle transition	1	0	1	0	1	0	1	1	1	0
51438	regulation of ubiquitin-protein transferase activity	1	0	1	0	1	0	1	0	1	0
51439	regulation of ubiquitin-protein ligase activity involved in mitotic cell cycle	1	0	0	0	1	0	1	0	0	0
51443	positive regulation of ubiquitin-protein transferase activity	1	0	1	0	1	0	1	0	1	0
51444	negative regulation of ubiquitin-protein transferase activity	1	0	1	0	1	0	1	0	0	0
51453	regulation of intracellular pH	0	0	1	1	0	0	1	0	0	0
51480	regulation of cytosolic calcium ion concentration	0	0	0	1	0	0	1	1	0	0
51493	regulation of cytoskeleton organization	1	0	1	1	1	0	1	1	1	0
51495	positive regulation of cytoskeleton organization	0	0	1	0	1	0	1	0	0	0
51588	regulation of neurotransmitter transport	0	0	1	1	0	0	0	0	0	0
51607	defense response to virus	1	0	0	0	1	0	1	0	0	0
51648	vesicle localization	0	0	1	1	0	0	0	0	0	0
51650	establishment of vesicle localization	0	0	1	1	0	0	0	0	0	0
51656	establishment of organelle localization	0	0	1	1	0	0	0	1	1	0
51668	localization within membrane	0	0	1	1	0	0	0	0	0	0
51701	interaction with host	0	0	0	0	0	0	1	0	0	0
51783	regulation of nuclear division	0	0	1	0	0	0	1	1	0	0
51806	entry into cell of other organism involved in symbiotic interaction	0	0	0	0	0	0	1	0	0	0
51828	entry into other organism involved in symbiotic interaction	0	0	0	0	0	0	1	0	0	0
51924	regulation of calcium ion transport	0	0	0	1	0	0	1	0	0	0
51928	positive regulation of calcium ion transport	0	0	0	0	0	0	1	1	0	0
51961	negative regulation of nervous system development	0	0	0	1	0	0	0	0	0	0
51962	positive regulation of nervous system development	0	0	1	1	0	0	0	0	0	0
51972	regulation of telomerase activity	0	0	0	0	0	0	0	0	1	0
51983	regulation of chromosome segregation	0	0	0	0	0	0	1	1	0	0
52547	regulation of peptidase activity	0	0	0	0	1	0	1	0	0	0
52548	regulation of endopeptidase activity	0	0	0	0	1	0	1	0	0	0
55001	muscle cell development	0	0	0	0	0	0	0	0	1	1
55002	striated muscle cell development	0	0	0	0	0	0	0	0	1	1
55067	monovalent inorganic cation homeostasis	0	0	1	0	0	0	0	0	0	0
55074	calcium ion homeostasis	0	0	0	1	0	0	1	1	0	0
60071	Wnt signaling pathway, planar cell polarity pathway	1	0	1	1	1	0	1	0	1	0
60147	regulation of posttranscriptional gene silencing	1	0	1	0	1	0	1	0	1	0
60249	anatomical structure homeostasis	0	0	0	0	0	0	1	1	0	0
60271	cilium assembly	0	0	1	1	0	0	1	1	0	0
60326	cell chemotaxis	0	0	0	0	1	0	1	1	0	0
60333	interferon-gamma-mediated signaling pathway	1	0	0	0	1	0	1	0	1	0
60359	response to ammonium ion	0	0	1	1	0	0	0	0	0	0
60401	cytosolic calcium ion transport	0	0	0	1	0	0	0	0	0	0
60485	mesenchyme development	0	0	0	0	0	0	1	1	0	0
60537	muscle tissue development	0	0	0	0	0	0	1	1	0	0
60541	respiratory system development	0	0	0	0	0	0	0	0	1	0
60562	epithelial tube morphogenesis	0	0	0	0	0	0	0	1	0	0
60627	regulation of vesicle-mediated transport	1	0	1	1	1	0	1	1	1	0
60759	regulation of response to cytokine stimulus	0	0	0	0	1	0	1	0	0	0
60828	regulation of canonical Wnt signaling pathway	1	0	1	0	1	0	1	0	1	0
60840	artery development	0	0	0	0	0	0	1	1	0	0
60964	regulation of gene silencing by miRNA	1	0	1	0	1	0	1	0	1	0
60966	regulation of gene silencing by RNA	1	0	1	0	1	0	1	0	1	0
60968	regulation of gene silencing	1	0	1	0	1	0	1	0	1	0
60993	kidney morphogenesis	0	0	0	0	0	0	0	1	0	0
61025	membrane fusion	0	0	0	1	0	0	1	0	0	0
61041	regulation of wound healing	0	0	0	0	1	0	1	0	0	0
61077	chaperone-mediated protein folding	0	0	1	0	0	0	1	0	0	0
61136	regulation of proteasomal protein catabolic process	0	0	1	0	1	0	0	0	1	0
61326	renal tubule development	0	0	0	0	1	0	0	1	0	0
61337	cardiac conduction	0	0	0	1	0	0	0	0	0	0
61387	regulation of extent of cell growth	0	0	1	0	0	0	0	0	0	0
61418	regulation of transcription from RNA polymerase II promoter in response to hypoxia	1	0	1	0	1	0	1	0	0	0
61448	connective tissue development	0	0	0	0	0	0	1	1	0	0
61564	axon development	0	0	1	1	0	0	0	1	0	0
65002	intracellular protein transmembrane transport	0	0	1	0	1	0	1	0	0	0
65004	protein-DNA complex assembly	0	0	0	0	0	0	1	1	1	0
70085	glycosylation	0	0	0	0	1	0	0	0	0	0
70125	mitochondrial translational elongation	1	0	1	0	1	0	1	0	1	0
70126	mitochondrial translational termination	1	0	1	0	1	0	1	0	1	0
70252	actin-mediated cell contraction	0	0	0	0	0	0	0	0	0	1
70302	regulation of stress-activated protein kinase signaling cascade	0	0	0	0	0	0	1	0	0	0
70304	positive regulation of stress-activated protein kinase signaling cascade	0	0	0	0	0	0	1	0	0	0
70372	regulation of ERK1 and ERK2 cascade	0	0	0	0	0	0	1	0	0	0
70374	positive regulation of ERK1 and ERK2 cascade	0	0	0	0	0	0	1	0	0	0
70482	response to oxygen levels	0	0	1	0	1	0	1	1	0	0
70507	regulation of microtubule cytoskeleton organization	0	0	1	1	0	0	1	1	1	0
70555	response to interleukin-1	0	0	0	0	0	0	1	0	0	0
70585	protein localization to mitochondrion	0	0	1	1	1	0	1	0	0	0
70588	calcium ion transmembrane transport	0	0	0	1	0	0	0	0	0	0
70613	regulation of protein processing	0	0	0	0	1	1	1	0	0	0
70646	protein modification by small protein removal	0	0	1	0	1	0	1	0	1	0
70661	leukocyte proliferation	0	0	0	0	0	0	1	0	0	0
70663	regulation of leukocyte proliferation	0	0	0	0	1	0	1	0	0	0
70664	negative regulation of leukocyte proliferation	0	0	0	0	1	0	1	0	0	0
70665	positive regulation of leukocyte proliferation	0	0	0	0	1	0	1	0	0	0
70838	divalent metal ion transport	0	0	1	1	0	0	0	0	0	1
70972	protein localization to endoplasmic reticulum	1	0	1	0	1	0	1	0	1	0
71103	DNA conformation change	0	0	0	0	0	0	1	1	1	0
71166	ribonucleoprotein complex localization	1	0	0	0	1	0	1	0	1	0
71216	cellular response to biotic stimulus	1	0	0	0	1	0	1	1	0	0
71219	cellular response to molecule of bacterial origin	1	0	0	0	1	0	1	1	0	0
71222	cellular response to lipopolysaccharide	1	0	0	0	1	0	1	1	0	0
71230	cellular response to amino acid stimulus	0	0	0	0	1	0	1	0	1	0
71260	cellular response to mechanical stimulus	0	0	0	0	0	0	1	0	0	0
71346	cellular response to interferon-gamma	1	0	0	0	1	0	1	0	1	0
71347	cellular response to interleukin-1	0	0	0	0	0	0	1	0	0	0
71356	cellular response to tumor necrosis factor	0	0	1	0	1	0	1	0	0	0
71426	ribonucleoprotein complex export from nucleus	1	0	0	0	1	0	1	0	1	0
71427	mRNA-containing ribonucleoprotein complex export from nucleus	1	0	0	0	1	0	1	0	1	0
71453	cellular response to oxygen levels	1	0	1	0	1	0	1	0	0	0
71456	cellular response to hypoxia	1	0	1	0	1	0	1	0	0	0
71466	cellular response to xenobiotic stimulus	0	0	0	0	1	1	0	0	0	0
71559	response to transforming growth factor beta	0	0	0	0	1	0	1	0	1	0
71560	cellular response to transforming growth factor beta stimulus	0	0	0	0	1	0	1	0	1	0
71774	response to fibroblast growth factor	0	0	0	0	0	0	1	0	0	0
71806	protein transmembrane transport	0	0	1	0	1	0	1	0	0	0
71824	protein-DNA complex subunit organization	0	0	0	0	0	0	0	1	1	0
71825	protein-lipid complex subunit organization	0	0	0	0	1	1	0	0	0	0
71826	ribonucleoprotein complex subunit organization	1	0	1	0	1	0	1	0	1	0
71827	plasma lipoprotein particle organization	0	0	0	0	1	1	0	0	0	0
71897	DNA biosynthetic process	0	0	0	0	0	0	1	1	0	0
71902	positive regulation of protein serine/threonine kinase activity	0	0	0	1	0	0	0	0	0	0
72001	renal system development	0	0	0	0	0	1	1	1	0	0
72006	nephron development	0	0	0	0	0	0	1	1	0	0
72009	nephron epithelium development	0	0	0	0	1	0	0	1	0	0
72028	nephron morphogenesis	0	0	0	0	0	0	0	1	0	0
72073	kidney epithelium development	0	0	0	0	0	0	0	1	0	0
72078	nephron tubule morphogenesis	0	0	0	0	0	0	0	1	0	0
72080	nephron tubule development	0	0	0	0	0	0	0	1	0	0
72088	nephron epithelium morphogenesis	0	0	0	0	0	0	0	1	0	0
72329	monocarboxylic acid catabolic process	0	0	0	0	1	1	0	0	1	0
72330	monocarboxylic acid biosynthetic process	0	0	1	1	1	1	0	0	0	0
72376	protein activation cascade	0	0	0	0	1	1	0	0	0	0
72384	organelle transport along microtubule	0	0	1	1	0	0	0	0	0	0
72503	cellular divalent inorganic cation homeostasis	0	0	0	1	0	0	1	1	0	0
72507	divalent inorganic cation homeostasis	0	0	0	1	0	0	1	1	0	0
72511	divalent inorganic cation transport	0	0	1	1	0	0	0	0	0	1
72521	purine-containing compound metabolic process	1	0	1	1	1	0	1	0	1	0
72522	purine-containing compound biosynthetic process	1	0	1	1	1	0	1	0	1	0
72524	pyridine-containing compound metabolic process	1	1	1	1	1	1	1	0	0	0
72583	clathrin-dependent endocytosis	0	0	1	1	0	0	0	0	0	0
72593	reactive oxygen species metabolic process	0	0	0	0	1	0	0	0	0	0
72594	establishment of protein localization to organelle	1	0	1	1	1	0	1	0	1	0
72599	establishment of protein localization to endoplasmic reticulum	1	0	1	0	1	0	1	0	1	0
72655	establishment of protein localization to mitochondrion	0	0	1	1	1	0	1	0	0	0
72657	protein localization to membrane	1	0	1	1	1	0	0	0	1	0
72659	protein localization to plasma membrane	0	0	1	1	0	0	0	0	0	0
75733	intracellular transport of virus	1	0	1	0	1	0	1	0	1	0
90066	regulation of anatomical structure size	1	0	0	0	1	0	1	1	1	0
90068	positive regulation of cell cycle process	0	0	0	0	0	0	1	1	0	0
90090	negative regulation of canonical Wnt signaling pathway	1	0	1	0	1	0	1	0	1	0
90092	regulation of transmembrane receptor protein serine/threonine kinase signaling pathway	0	0	0	0	0	0	1	1	0	0
90114	COPII-coated vesicle budding	0	0	1	0	1	0	1	0	1	0
90150	establishment of protein localization to membrane	1	0	1	0	1	0	1	0	1	0
90175	regulation of establishment of planar polarity	1	0	1	0	1	0	1	0	1	0
90181	regulation of cholesterol metabolic process	0	0	0	0	1	0	1	0	0	0
90257	regulation of muscle system process	0	0	0	0	0	0	0	0	0	1
90263	positive regulation of canonical Wnt signaling pathway	1	0	1	0	1	0	1	0	0	0
90276	regulation of peptide hormone secretion	0	0	0	0	0	1	0	0	0	0
90287	regulation of cellular response to growth factor stimulus	0	0	0	0	0	0	1	1	0	0
90305	nucleic acid phosphodiester bond hydrolysis	1	0	0	0	0	0	1	0	0	0
90501	RNA phosphodiester bond hydrolysis	0	0	0	0	0	0	1	0	0	0
90662	ATP hydrolysis coupled transmembrane transport	0	0	0	0	1	0	0	0	0	0
97006	regulation of plasma lipoprotein particle levels	0	0	0	0	0	0	1	1	0	0
97031	mitochondrial respiratory chain complex I biogenesis	1	0	1	0	1	0	1	0	1	0
97164	ammonium ion metabolic process	0	0	0	0	1	1	0	0	0	0
97190	apoptotic signaling pathway	0	0	1	0	0	0	1	0	0	0
97193	intrinsic apoptotic signaling pathway	0	0	0	0	0	0	0	1	0	0
97305	response to alcohol	0	0	0	0	0	1	0	0	0	0
97435	supramolecular fiber organization	0	0	1	0	1	0	1	0	1	1
97479	synaptic vesicle localization	0	0	1	1	0	0	0	0	0	0
97480	establishment of synaptic vesicle localization	0	0	1	1	0	0	0	0	0	0
97485	neuron projection guidance	0	0	1	1	0	0	0	1	0	0
97529	myeloid leukocyte migration	0	0	0	0	1	0	1	1	0	0
97711	ciliary basal body docking	0	0	1	0	0	0	0	0	0	0
98542	defense response to other organism	1	0	0	0	1	0	1	0	0	0
98602	single organism cell adhesion	1	0	0	0	1	0	1	1	0	0
98609	cell-cell adhesion	0	0	0	1	1	0	1	1	0	0
98656	anion transmembrane transport	0	0	0	1	0	0	0	0	0	0
98661	inorganic anion transmembrane transport	0	0	0	1	0	0	0	0	0	0
98727	maintenance of cell number	0	0	0	0	0	0	0	0	1	0
98742	cell-cell adhesion via plasma-membrane adhesion molecules	0	0	0	0	0	0	1	1	0	0
98813	nuclear chromosome segregation	0	0	1	0	1	0	1	1	1	0
98876	vesicle-mediated transport to the plasma membrane	0	0	0	0	1	0	0	0	0	0
98916	anterograde trans-synaptic signaling	0	0	1	1	0	0	0	0	0	0
99003	vesicle-mediated transport in synapse	0	0	1	1	0	0	0	0	0	0
99111	microtubule-based transport	0	0	1	1	0	0	0	0	0	0
99131	ATP hydrolysis coupled ion transmembrane transport	0	0	0	0	1	0	0	0	0	0
99504	synaptic vesicle cycle	0	0	1	1	0	0	0	0	0	0
99531	presynaptic process involved in chemical synaptic transmission	0	0	1	1	0	0	0	0	0	0
99536	synaptic signaling	0	0	1	1	0	0	0	0	0	0
99537	trans-synaptic signaling	0	0	1	1	0	0	0	0	0	0
99643	signal release from synapse	0	0	1	1	0	0	0	0	0	0
120031	plasma membrane bounded cell projection assembly	0	0	1	1	0	0	0	1	0	0
140013	meiotic nuclear division	0	0	0	0	0	0	1	0	0	0
140014	mitotic nuclear division	0	0	1	0	1	0	1	1	1	0
140029	exocytic process	0	0	1	1	0	0	0	0	0	0
198738	cell-cell signaling by wnt	1	0	1	0	1	0	1	0	1	0
1900034	regulation of cellular response to heat	1	0	1	0	1	0	1	0	0	0
1900046	regulation of hemostasis	0	0	0	0	1	1	1	0	0	0
1900180	regulation of protein localization to nucleus	1	0	0	0	0	0	0	0	0	0
1900182	positive regulation of protein localization to nucleus	1	0	0	0	0	0	1	0	0	0
1901136	carbohydrate derivative catabolic process	1	0	0	0	0	0	1	0	0	0
1901214	regulation of neuron death	0	0	1	1	0	0	0	0	0	0
1901215	negative regulation of neuron death	0	0	1	1	0	0	1	0	0	0
1901216	positive regulation of neuron death	0	0	1	1	0	0	0	0	0	0
1901293	nucleoside phosphate biosynthetic process	1	0	1	1	1	0	1	0	1	0
1901342	regulation of vasculature development	0	0	0	0	0	0	1	1	0	0
1901343	negative regulation of vasculature development	0	0	0	0	0	0	1	0	0	0
1901361	organic cyclic compound catabolic process	1	0	0	0	1	1	1	0	1	0
1901379	regulation of potassium ion transmembrane transport	0	0	0	1	0	0	0	0	0	0
1901568	fatty acid derivative metabolic process	0	0	0	1	1	1	0	0	0	0
1901570	fatty acid derivative biosynthetic process	0	0	0	0	0	0	1	0	0	0
1901605	alpha-amino acid metabolic process	0	0	0	0	1	1	0	0	0	0
1901606	alpha-amino acid catabolic process	0	0	0	0	1	1	0	0	0	0
1901607	alpha-amino acid biosynthetic process	0	0	0	0	1	0	0	0	0	0
1901615	organic hydroxy compound metabolic process	0	0	0	0	1	1	0	0	0	0
1901617	organic hydroxy compound biosynthetic process	0	0	0	0	1	1	1	0	0	0
1901659	glycosyl compound biosynthetic process	0	0	0	0	0	0	1	0	0	0
1901800	positive regulation of proteasomal protein catabolic process	0	0	0	0	1	0	0	0	1	0
1901879	regulation of protein depolymerization	0	0	0	0	1	0	1	0	0	0
1901987	regulation of cell cycle phase transition	1	0	1	0	1	0	1	1	1	0
1901988	negative regulation of cell cycle phase transition	0	0	1	0	1	0	1	1	1	0
1901989	positive regulation of cell cycle phase transition	0	0	0	0	0	0	1	0	0	0
1901990	regulation of mitotic cell cycle phase transition	1	0	1	0	1	0	1	1	1	0
1901991	negative regulation of mitotic cell cycle phase transition	0	0	1	0	1	0	1	1	1	0
1902041	regulation of extrinsic apoptotic signaling pathway via death domain receptors	0	0	0	0	0	0	1	0	0	0
1902105	regulation of leukocyte differentiation	0	0	0	0	1	0	1	1	0	0
1902107	positive regulation of leukocyte differentiation	0	0	0	0	0	0	1	0	0	0
1902305	regulation of sodium ion transmembrane transport	0	0	0	1	0	0	0	0	0	0
1902476	chloride transmembrane transport	0	0	0	1	0	0	0	0	0	0
1902579	multi-organism localization	1	0	0	0	1	0	1	0	1	0
1902600	hydrogen ion transmembrane transport	1	0	1	1	1	0	1	0	1	0
1902652	secondary alcohol metabolic process	0	0	0	0	1	0	1	0	0	0
1902749	regulation of cell cycle G2/M phase transition	0	0	1	0	1	0	1	1	1	0
1902750	negative regulation of cell cycle G2/M phase transition	1	0	1	0	1	0	1	0	1	0
1902850	microtubule cytoskeleton organization involved in mitosis	0	0	1	1	0	0	1	1	0	0
1902903	regulation of supramolecular fiber organization	1	0	0	0	1	0	1	1	1	0
1902905	positive regulation of supramolecular fiber organization	1	0	0	0	1	0	1	1	0	0
1902930	regulation of alcohol biosynthetic process	0	0	0	0	1	0	1	0	0	0
1903034	regulation of response to wounding	0	0	0	0	1	0	1	0	0	0
1903035	negative regulation of response to wounding	0	0	0	0	1	1	0	1	0	0
1903037	regulation of leukocyte cell-cell adhesion	0	0	0	0	1	0	1	1	1	0
1903038	negative regulation of leukocyte cell-cell adhesion	0	0	0	0	0	0	1	0	0	0
1903039	positive regulation of leukocyte cell-cell adhesion	1	0	0	0	1	0	1	0	1	0
1903046	meiotic cell cycle process	0	0	0	0	0	0	1	0	0	0
1903050	regulation of proteolysis involved in cellular protein catabolic process	1	0	1	0	1	0	1	0	1	0
1903052	positive regulation of proteolysis involved in cellular protein catabolic process	1	0	1	0	1	0	1	0	1	0
1903076	regulation of protein localization to plasma membrane	0	0	1	1	0	0	0	0	0	0
1903146	regulation of mitophagy	0	0	1	0	0	0	0	0	0	0
1903305	regulation of regulated secretory pathway	0	0	1	1	0	0	0	0	0	0
1903311	regulation of mRNA metabolic process	1	0	0	0	0	0	1	0	1	0
1903317	regulation of protein maturation	0	0	0	0	1	1	1	0	0	0
1903320	regulation of protein modification by small protein conjugation or removal	1	0	1	0	1	0	1	1	1	0
1903321	negative regulation of protein modification by small protein conjugation or removal	1	0	1	0	1	0	1	0	0	0
1903322	positive regulation of protein modification by small protein conjugation or removal	1	0	1	0	1	0	1	1	1	0
1903362	regulation of cellular protein catabolic process	1	0	1	0	1	0	1	0	1	0
1903364	positive regulation of cellular protein catabolic process	1	0	1	0	1	0	1	0	1	0
1903509	liposaccharide metabolic process	0	0	0	0	0	0	1	0	0	0
1903510	mucopolysaccharide metabolic process	0	0	0	0	0	0	1	1	0	0
1903522	regulation of blood circulation	0	0	0	1	0	0	0	1	0	0
1903532	positive regulation of secretion by cell	0	0	1	1	0	0	1	0	0	0
1903555	regulation of tumor necrosis factor superfamily cytokine production	0	0	0	0	1	0	1	1	0	0
1903706	regulation of hemopoiesis	0	0	0	0	1	0	1	1	0	0
1903708	positive regulation of hemopoiesis	0	0	0	0	0	0	1	0	0	0
1903729	regulation of plasma membrane organization	0	0	1	1	0	0	0	0	0	0
1903747	regulation of establishment of protein localization to mitochondrion	0	0	1	0	0	0	0	0	0	0
1903779	regulation of cardiac conduction	0	0	0	1	0	0	0	0	0	0
1903829	positive regulation of cellular protein localization	0	0	1	1	0	0	1	0	0	0
1903844	regulation of cellular response to transforming growth factor beta stimulus	0	0	0	0	0	0	0	1	0	0
1903900	regulation of viral life cycle	1	0	0	0	1	0	1	0	0	0
1903901	negative regulation of viral life cycle	1	0	0	0	1	0	1	0	0	0
1904018	positive regulation of vasculature development	0	0	0	0	0	0	1	1	0	0
1904035	regulation of epithelial cell apoptotic process	0	0	0	0	0	0	1	0	0	0
1904062	regulation of cation transmembrane transport	0	0	1	1	0	0	0	0	0	1
1904375	regulation of protein localization to cell periphery	0	0	1	1	0	0	0	0	0	0
1904591	positive regulation of protein import	0	1	0	0	0	0	0	0	0	0
1904666	regulation of ubiquitin protein ligase activity	1	0	1	0	1	0	1	0	1	0
1904667	negative regulation of ubiquitin protein ligase activity	1	0	0	0	1	0	1	0	0	0
1904668	positive regulation of ubiquitin protein ligase activity	1	0	1	0	1	0	1	0	1	0
1905114	cell surface receptor signaling pathway involved in cell-cell signaling	1	0	1	1	1	0	1	0	1	0
1905330	regulation of morphogenesis of an epithelium	1	0	1	0	1	0	1	0	0	0
1905475	regulation of protein localization to membrane	0	0	1	1	0	0	0	0	0	0
1905477	positive regulation of protein localization to membrane	0	0	1	1	0	0	0	0	0	0
1990138	neuron projection extension	0	0	0	1	0	0	0	0	0	0
1990778	protein localization to cell periphery	0	0	1	1	0	0	0	0	0	0
2000021	regulation of ion homeostasis	0	0	0	1	0	0	1	1	0	0
2000027	regulation of organ morphogenesis	1	0	1	0	1	0	1	1	0	0
2000058	regulation of protein ubiquitination involved in ubiquitin-dependent protein catabolic process	1	0	1	0	1	0	1	1	1	0
2000060	positive regulation of protein ubiquitination involved in ubiquitin-dependent protein catabolic process	1	0	1	0	1	0	1	1	1	0
2000106	regulation of leukocyte apoptotic process	0	0	0	0	1	0	1	0	0	0
2000147	positive regulation of cell motility	0	0	0	0	0	0	1	1	0	0
2000181	negative regulation of blood vessel morphogenesis	0	0	0	0	0	0	1	0	0	0
2000278	regulation of DNA biosynthetic process	1	0	0	0	1	0	1	0	1	0
2000573	positive regulation of DNA biosynthetic process	0	0	0	0	1	0	1	0	1	0
2001020	regulation of response to DNA damage stimulus	0	0	0	0	0	0	0	1	1	0
2001233	regulation of apoptotic signaling pathway	0	0	0	1	0	0	0	1	0	0
2001234	negative regulation of apoptotic signaling pathway	0	0	0	1	0	0	1	1	0	0
2001236	regulation of extrinsic apoptotic signaling pathway	0	0	0	0	0	0	1	0	0	0
2001237	negative regulation of extrinsic apoptotic signaling pathway	0	0	0	0	0	0	1	0	0	0
2001251	negative regulation of chromosome organization	0	0	0	0	0	0	1	1	1	0
2001252	positive regulation of chromosome organization	0	0	0	0	0	0	1	0	1	0
2001257	regulation of cation channel activity	0	0	0	1	0	0	0	0	0	1
