# Supplementary material for: Differential coexpression in human tissues and the confounding effect of mean expression levels
Source: Bioinformatics. 2018 Jul 3;35(1):55–61. doi: 10.1093/bioinformatics/bty538 (PMC6298061; doi:10.1093/bioinformatics/bty538)
Supplement: Supplementary Data [file bty538_suppl_data.zip › liver_TSExclusiveDiseaseTerms_linkRemoval.txt]

DOID	Name	geneCount	linkCount(lc)	lc_minusPurLinks	lc_minusExpressionInducedLinks	1-ratioOfPureLinks	1-RatioOfExpressionInducedLinks	SigAfterPureRemoval	SigAfterExpressionInducedRemoval	log10Pvalue_plus1e-20	log10PvalueAfterPureRemoval_plus1e-20	log10PvalueAfterEIremovalplus1e-20	significantCountIn100_randomPureLinkRemoval	significantCountIn100_randomEILinkRemoval_pureCount	significantCountIn100_randomEILinkRemoval
409	liver disease	67	23	23	11	1.00	0.48	1	1	-15.65	-15.65	-5.02	100	100	90
1168	familial hyperlipidemia	41	7	7	2	1.00	0.29	1	0	-5.32	-5.32	-1.20	57	0	3
2452	thrombophilia	13	3	3	0	1.00	0.00	1	0	-5.71	-5.71	-1.08	81	0	24
3571	liver cancer	42	7	7	0	1.00	0.00	1	0	-5.17	-5.17	-0.21	58	0	2
9252	amino acid metabolic disorder	18	12	11	7	0.92	0.58	1	1	-20.00	-20.00	-10.94	100	100	99
50741	alcohol dependence	13	3	3	2	1.00	0.67	1	0	-5.71	-5.71	-4.02	80	82	21
