# Supplementary material for: Differential coexpression in human tissues and the confounding effect of mean expression levels
Source: Bioinformatics. 2018 Jul 3;35(1):55–61. doi: 10.1093/bioinformatics/bty538 (PMC6298061; doi:10.1093/bioinformatics/bty538)
Supplement: Supplementary Data [file bty538_suppl_data.zip › liver_TSExclusiveFunctionTerms_linkRemoval.txt]

functionID	functionName	geneCount	linkCount(lc)	lc_minusPurLinks	lc_minusExpressionInducedLinks	1-ratioOfPureLinks	1-RatioOfExpressionInducedLinks	SigAfterPureRemoval	SigAfterExpressionInducedRemoval	log10Pvalue_plus1e-20	log10PvalueAfterPureRemoval_plus1e-20	log10PvalueAfterEIremovalplus1e-20	significantCountIn100_randomPureLinkRemoval	significantCountIn100_randomEILinkRemoval_pureCount	significantCountIn100_randomEILinkRemoval
1523	retinoid metabolic process	29	7	7	4	1.00	0.57	1	0	-7.60	-7.60	-4.00	95	92	17
1676	long-chain fatty acid metabolic process	24	5	4	2	0.80	0.40	0	0	-6.10	-4.79	-2.43	74	65	6
2920	regulation of humoral immune response	20	11	11	5	1.00	0.45	1	1	-20.00	-20.00	-7.05	100	100	96
6066	alcohol metabolic process	92	32	30	13	0.94	0.41	1	0	-20.00	-15.35	-3.51	100	100	88
6576	cellular biogenic amine metabolic process	26	13	13	7	1.00	0.54	1	1	-20.00	-20.00	-8.35	100	100	97
6637	acyl-CoA metabolic process	24	10	10	6	1.00	0.60	1	1	-13.50	-13.50	-7.47	100	100	85
6720	isoprenoid metabolic process	41	17	16	14	0.94	0.82	1	1	-20.00	-15.65	-13.20	100	100	99
6721	terpenoid metabolic process	35	15	14	12	0.93	0.80	1	1	-20.00	-15.26	-12.50	100	100	100
6805	xenobiotic metabolic process	33	20	20	6	1.00	0.30	1	1	-20.00	-20.00	-5.59	100	100	100
6869	lipid transport	76	24	24	3	1.00	0.12	1	0	-14.13	-14.13	-0.42	100	100	76
6956	complement activation	23	20	20	2	1.00	0.10	1	0	-20.00	-20.00	-2.54	100	100	100
8652	cellular amino acid biosynthetic process	28	5	5	4	1.00	0.80	1	0	-5.31	-5.31	-4.14	72	88	8
9069	serine family amino acid metabolic process	22	6	6	3	1.00	0.50	1	0	-8.00	-8.00	-3.86	95	98	25
9308	amine metabolic process	29	15	15	8	1.00	0.53	1	1	-20.00	-20.00	-8.92	100	100	96
9410	response to xenobiotic stimulus	36	21	21	6	1.00	0.29	1	0	-20.00	-20.00	-5.09	100	100	99
9636	response to toxic substance	58	14	13	7	0.93	0.50	1	0	-8.98	-8.06	-3.23	100	100	29
10876	lipid localization	82	34	34	8	1.00	0.24	1	0	-20.00	-20.00	-1.90	100	100	99
10951	negative regulation of endopeptidase activity	55	10	10	1	1.00	0.10	1	0	-5.92	-5.92	-0.31	50	32	0
16051	carbohydrate biosynthetic process	34	7	7	4	1.00	0.57	1	0	-6.54	-6.54	-3.35	90	95	13
16101	diterpenoid metabolic process	32	11	10	8	0.91	0.73	1	1	-12.11	-10.76	-8.17	100	100	79
19216	regulation of lipid metabolic process	135	26	25	10	0.96	0.38	0	0	-5.24	-4.79	-0.39	14	10	0
34754	cellular hormone metabolic process	34	11	11	7	1.00	0.64	1	1	-11.49	-11.49	-6.54	100	100	78
35383	thioester metabolic process	24	10	10	6	1.00	0.60	1	1	-13.50	-13.50	-7.47	100	100	85
42180	cellular ketone metabolic process	31	9	9	6	1.00	0.67	1	1	-9.71	-9.71	-5.95	100	100	45
42445	hormone metabolic process	56	16	16	9	1.00	0.56	1	0	-11.38	-11.38	-4.94	100	100	58
42493	response to drug	117	32	32	17	1.00	0.53	1	0	-11.28	-11.28	-3.13	100	100	21
44106	cellular amine metabolic process	27	14	14	7	1.00	0.50	1	1	-20.00	-20.00	-8.09	100	100	98
45471	response to ethanol	34	7	7	3	1.00	0.43	1	0	-6.54	-6.54	-2.43	95	87	19
46883	regulation of hormone secretion	56	12	12	6	1.00	0.50	1	0	-7.52	-7.52	-2.74	96	95	5
50796	regulation of insulin secretion	38	8	8	4	1.00	0.50	1	0	-6.88	-6.88	-2.92	94	90	8
51260	protein homooligomerization	84	15	14	4	0.93	0.27	0	0	-5.55	-4.92	-0.47	39	13	0
51262	protein tetramerization	38	7	7	0	1.00	0.00	1	0	-5.81	-5.81	-0.27	68	29	4
51289	protein homotetramerization	24	5	5	0	1.00	0.00	1	0	-6.10	-6.10	-0.58	73	36	10
71466	cellular response to xenobiotic stimulus	34	20	20	6	1.00	0.30	1	1	-20.00	-20.00	-5.42	100	100	100
71825	protein-lipid complex subunit organization	23	5	5	0	1.00	0.00	1	0	-6.32	-6.32	-0.61	70	44	11
71827	plasma lipoprotein particle organization	23	5	5	0	1.00	0.00	1	0	-6.32	-6.32	-0.61	70	44	11
72376	protein activation cascade	30	26	26	5	1.00	0.19	1	0	-20.00	-20.00	-4.97	100	100	100
90276	regulation of peptide hormone secretion	43	11	11	6	1.00	0.55	1	0	-9.14	-9.14	-4.11	100	100	28
97164	ammonium ion metabolic process	59	13	13	5	1.00	0.38	1	0	-7.87	-7.87	-1.90	99	96	18
97305	response to alcohol	52	9	9	3	1.00	0.33	1	0	-5.50	-5.50	-1.22	56	44	0
1901605	alpha-amino acid metabolic process	90	144	143	56	0.99	0.39	1	1	-20.00	-20.00	-20.00	100	100	100
1901606	alpha-amino acid catabolic process	49	95	95	39	1.00	0.41	1	1	-20.00	-20.00	-20.00	100	100	100
1901615	organic hydroxy compound metabolic process	137	98	95	42	0.97	0.43	1	1	-20.00	-20.00	-13.69	100	100	100
