# Supplementary material for: Differential coexpression in human tissues and the confounding effect of mean expression levels
Source: Bioinformatics. 2018 Jul 3;35(1):55–61. doi: 10.1093/bioinformatics/bty538 (PMC6298061; doi:10.1093/bioinformatics/bty538)
Supplement: Supplementary Data [file bty538_suppl_data.zip › lung_TSExclusiveDiseaseTerms_linkRemoval.txt]

DOID	Name	geneCount	linkCount(lc)	lc_minusPurLinks	lc_minusExpressionInducedLinks	1-ratioOfPureLinks	1-RatioOfExpressionInducedLinks	SigAfterPureRemoval	SigAfterExpressionInducedRemoval	log10Pvalue_plus1e-20	log10PvalueAfterPureRemoval_plus1e-20	log10PvalueAfterEIremovalplus1e-20	significantCountIn100_randomPureLinkRemoval	significantCountIn100_randomEILinkRemoval_pureCount	significantCountIn100_randomEILinkRemoval
184	bone cancer	5	1	1	1	1.00	1.00	1	1	-4.95	-4.95	-4.95	91	100	86
219	colon cancer	52	9	9	5	1.00	0.56	1	0	-8.62	-8.62	-4.18	99	0	86
235	colonic benign neoplasm	52	9	9	5	1.00	0.56	1	0	-8.62	-8.62	-4.18	99	0	86
288	endometriosis of uterus	71	17	16	17	0.94	1.00	1	1	-14.63	-13.48	-14.63	100	100	100
289	endometriosis	73	18	17	18	0.94	1.00	1	1	-15.35	-14.23	-15.35	100	100	100
299	adenocarcinoma	55	6	4	5	0.67	0.83	0	0	-4.89	-2.99	-3.91	51	0	23
363	uterine cancer	84	10	8	8	0.80	0.80	0	0	-5.64	-4.07	-4.07	67	0	47
850	lung disease	38	14	12	8	0.86	0.57	1	1	-20.00	-15.95	-9.80	100	100	100
1205	hypersensitivity reaction type I disease	46	10	9	8	0.90	0.80	1	1	-10.97	-9.64	-8.35	100	54	96
1793	pancreatic cancer	113	19	16	19	0.84	1.00	1	1	-9.69	-7.34	-9.69	100	0	93
1852	intrahepatic cholestasis	5	1	1	1	1.00	1.00	1	1	-4.95	-4.95	-4.95	88	0	82
2224	hemorrhagic thrombocythemia	5	1	1	1	1.00	1.00	1	1	-4.95	-4.95	-4.95	83	0	75
2394	ovarian cancer	124	26	25	17	0.96	0.65	1	1	-13.95	-13.10	-6.91	100	1	100
2730	epidermolysis bullosa	7	2	2	0	1.00	0.00	1	0	-6.78	-6.78	-1.98	83	0	65
2893	cervix carcinoma	73	12	12	5	1.00	0.42	1	0	-8.79	-8.79	-2.63	100	13	93
3082	interstitial lung disease	27	10	9	5	0.90	0.50	1	1	-15.95	-14.24	-7.47	100	0	100
3827	congenital diaphragmatic hernia	13	3	3	3	1.00	1.00	1	1	-7.06	-7.06	-7.06	92	100	88
4903	granular cell carcinoma	55	6	4	5	0.67	0.83	0	0	-4.89	-2.99	-3.91	51	0	23
4929	tubular adenocarcinoma	55	6	4	5	0.67	0.83	0	0	-4.89	-2.99	-3.91	51	0	23
5675	cribriform carcinoma	55	6	4	5	0.67	0.83	0	0	-4.89	-2.99	-3.91	51	0	23
9074	systemic lupus erythematosus	59	22	17	17	0.77	0.77	1	1	-20.00	-20.00	-20.00	100	100	100
9562	primary ciliary dyskinesia	16	5	5	2	1.00	0.40	1	0	-10.26	-10.26	-4.47	98	80	96
11162	respiratory failure	5	1	1	1	1.00	1.00	1	1	-4.95	-4.95	-4.95	91	100	87
11394	adult respiratory distress syndrome	30	8	7	4	0.88	0.50	1	1	-11.64	-10.02	-5.48	100	0	99
11713	diabetic angiopathy	19	3	3	3	1.00	1.00	1	1	-5.70	-5.70	-5.70	72	100	58
12120	pulmonary alveolar proteinosis	5	3	2	1	0.67	0.33	1	1	-10.88	-7.83	-4.95	100	0	98
12236	primary biliary cirrhosis	20	5	5	5	1.00	1.00	1	1	-9.06	-9.06	-9.06	99	100	97
13375	temporal arteritis	8	2	2	2	1.00	1.00	1	1	-6.39	-6.39	-6.39	82	0	60
13636	Fanconi's anemia	14	4	4	4	1.00	1.00	1	1	-8.85	-8.85	-8.85	99	0	98
80001	bone disease	34	5	5	5	1.00	1.00	1	1	-6.28	-6.28	-6.28	96	0	76
