# Supplementary material for: Differential coexpression in human tissues and the confounding effect of mean expression levels
Source: Bioinformatics. 2018 Jul 3;35(1):55–61. doi: 10.1093/bioinformatics/bty538 (PMC6298061; doi:10.1093/bioinformatics/bty538)
Supplement: Supplementary Data [file bty538_suppl_data.zip › lung_TSExclusiveFunctionTerms_linkRemoval.txt]

functionID	functionName	geneCount	linkCount(lc)	lc_minusPurLinks	lc_minusExpressionInducedLinks	1-ratioOfPureLinks	1-RatioOfExpressionInducedLinks	SigAfterPureRemoval	SigAfterExpressionInducedRemoval	log10Pvalue_plus1e-20	log10PvalueAfterPureRemoval_plus1e-20	log10PvalueAfterEIremovalplus1e-20	significantCountIn100_randomPureLinkRemoval	significantCountIn100_randomEILinkRemoval_pureCount	significantCountIn100_randomEILinkRemoval
18	regulation of DNA recombination	21	3	3	0	1.00	0.00	1	0	-5.34	-5.34	-1.00	71	4	58
70	mitotic sister chromatid segregation	37	17	17	11	1.00	0.65	1	1	-20.00	-20.00	-14.59	100	100	100
75	cell cycle checkpoint	63	17	17	4	1.00	0.24	1	0	-20.00	-20.00	-2.48	100	94	100
77	DNA damage checkpoint	41	7	7	3	1.00	0.43	1	0	-7.87	-7.87	-3.07	98	59	86
82	G1/S transition of mitotic cell cycle	45	16	14	16	0.88	1.00	1	1	-20.00	-20.00	-20.00	100	100	100
723	telomere maintenance	36	23	18	16	0.78	0.70	1	1	-20.00	-20.00	-20.00	100	100	100
731	DNA synthesis involved in DNA repair	31	6	5	3	0.83	0.50	1	0	-8.24	-6.76	-4.00	99	79	92
1704	formation of primary germ layer	32	5	5	5	1.00	1.00	1	1	-6.59	-6.59	-6.59	61	100	26
1763	morphogenesis of a branching structure	44	8	8	4	1.00	0.50	1	0	-8.69	-8.69	-3.88	95	67	75
1822	kidney development	83	22	21	15	0.95	0.68	1	1	-20.00	-20.00	-10.33	100	100	100
2009	morphogenesis of an epithelium	135	23	21	13	0.91	0.57	1	0	-9.95	-8.51	-3.58	100	90	95
2690	positive regulation of leukocyte chemotaxis	28	5	5	5	1.00	1.00	1	1	-7.29	-7.29	-7.29	94	100	70
3002	regionalization	88	12	12	10	1.00	0.83	1	1	-6.90	-6.90	-5.26	89	100	53
3007	heart morphogenesis	88	19	19	12	1.00	0.63	1	1	-13.55	-13.55	-6.90	100	100	100
3013	circulatory system process	105	18	18	18	1.00	1.00	1	1	-9.93	-9.93	-9.93	99	100	88
3158	endothelium development	31	4	4	4	1.00	1.00	1	1	-5.34	-5.34	-5.34	62	100	38
6282	regulation of DNA repair	31	6	6	3	1.00	0.50	1	0	-8.24	-8.24	-4.00	97	80	92
6310	DNA recombination	70	32	31	23	0.97	0.72	1	1	-20.00	-20.00	-20.00	100	100	100
6323	DNA packaging	47	7	6	5	0.86	0.71	1	0	-6.96	-5.78	-4.67	77	66	65
7052	mitotic spindle organization	24	5	5	1	1.00	0.20	1	0	-8.09	-8.09	-2.06	91	20	78
7093	mitotic cell cycle checkpoint	44	11	11	2	1.00	0.18	1	0	-12.80	-12.80	-1.91	100	61	98
7162	negative regulation of cell adhesion	94	11	10	11	0.91	1.00	0	1	-5.48	-4.73	-5.48	31	100	6
7492	endoderm development	26	4	4	4	1.00	1.00	1	1	-6.10	-6.10	-6.10	67	100	39
7517	muscle organ development	66	18	15	12	0.83	0.67	1	1	-20.00	-13.29	-9.84	100	100	100
8015	blood circulation	105	18	18	18	1.00	1.00	1	1	-9.93	-9.93	-9.93	99	100	88
8544	epidermis development	72	9	9	4	1.00	0.44	1	0	-6.00	-6.00	-2.00	38	0	15
9913	epidermal cell differentiation	39	7	7	2	1.00	0.29	1	0	-8.21	-8.21	-2.19	97	35	90
10212	response to ionizing radiation	64	8	8	4	1.00	0.50	1	0	-5.93	-5.93	-2.42	35	6	21
14074	response to purine-containing compound	40	5	5	2	1.00	0.40	1	0	-5.46	-5.46	-2.13	57	7	32
14706	striated muscle tissue development	69	13	13	2	1.00	0.15	1	0	-10.46	-10.46	-0.94	100	42	96
17015	regulation of transforming growth factor beta receptor signaling pathway	41	6	6	6	1.00	1.00	1	1	-6.58	-6.58	-6.58	91	100	72
30216	keratinocyte differentiation	23	7	7	2	1.00	0.29	1	0	-11.88	-11.88	-3.52	100	70	100
30335	positive regulation of cell migration	149	45	44	40	0.98	0.89	1	1	-20.00	-20.00	-20.00	100	100	100
30799	regulation of cyclic nucleotide metabolic process	34	5	5	5	1.00	1.00	1	1	-6.28	-6.28	-6.28	63	100	35
31570	DNA integrity checkpoint	41	7	7	3	1.00	0.43	1	0	-7.87	-7.87	-3.07	98	59	86
31589	cell-substrate adhesion	52	7	6	7	0.86	1.00	0	1	-6.30	-5.21	-6.30	48	100	15
32102	negative regulation of response to external stimulus	66	13	13	13	1.00	1.00	1	1	-10.96	-10.96	-10.96	100	100	97
32200	telomere organization	37	23	18	16	0.78	0.70	1	1	-20.00	-20.00	-20.00	100	100	100
32835	glomerulus development	20	4	4	1	1.00	0.25	1	0	-7.25	-7.25	-2.37	95	31	87
34330	cell junction organization	62	10	10	7	1.00	0.70	1	0	-8.25	-8.25	-5.17	87	87	73
35051	cardiocyte differentiation	36	6	6	1	1.00	0.17	1	0	-7.35	-7.35	-1.39	91	10	67
35239	tube morphogenesis	111	23	23	12	1.00	0.52	1	0	-13.45	-13.45	-4.72	100	100	99
43588	skin development	64	8	8	3	1.00	0.38	1	0	-5.93	-5.93	-1.71	43	0	21
43902	positive regulation of multi-organism process	54	7	6	7	0.86	1.00	0	1	-6.05	-5.00	-6.05	40	100	20
44843	cell cycle G1/S phase transition	45	16	14	16	0.88	1.00	1	1	-20.00	-20.00	-20.00	100	100	100
45216	cell-cell junction organization	53	7	7	7	1.00	1.00	1	1	-6.17	-6.17	-6.17	40	100	25
45765	regulation of angiogenesis	72	13	11	10	0.85	0.77	1	1	-9.98	-7.92	-6.94	99	100	89
45766	positive regulation of angiogenesis	41	5	5	5	1.00	1.00	1	1	-5.34	-5.34	-5.34	62	100	26
45787	positive regulation of cell cycle	103	18	16	11	0.89	0.61	1	0	-10.21	-8.50	-4.70	100	98	97
45807	positive regulation of endocytosis	48	12	9	12	0.75	1.00	1	1	-13.28	-9.28	-13.28	100	100	100
46683	response to organophosphorus	35	5	5	2	1.00	0.40	1	0	-6.14	-6.14	-2.46	57	7	32
48562	embryonic organ morphogenesis	79	10	10	8	1.00	0.80	1	0	-6.15	-6.15	-4.47	75	72	39
48568	embryonic organ development	124	17	17	13	1.00	0.76	1	0	-6.91	-6.91	-4.34	72	64	40
48608	reproductive structure development	128	20	19	14	0.95	0.70	1	0	-8.60	-7.89	-4.63	98	97	81
48705	skeletal system morphogenesis	60	9	7	9	0.78	1.00	1	1	-7.45	-5.38	-7.45	94	100	80
48706	embryonic skeletal system development	36	6	6	6	1.00	1.00	1	1	-7.35	-7.35	-7.35	94	100	60
48738	cardiac muscle tissue development	48	7	7	1	1.00	0.14	1	0	-6.82	-6.82	-0.96	83	7	63
48754	branching morphogenesis of an epithelial tube	34	5	5	2	1.00	0.40	1	0	-6.28	-6.28	-2.53	52	7	28
48844	artery morphogenesis	20	6	6	3	1.00	0.50	1	1	-10.94	-10.94	-5.52	100	100	99
50678	regulation of epithelial cell proliferation	90	14	13	8	0.93	0.57	1	0	-8.41	-7.53	-3.62	100	59	66
50921	positive regulation of chemotaxis	46	7	7	7	1.00	1.00	1	1	-7.10	-7.10	-7.10	87	100	58
51216	cartilage development	38	5	5	5	1.00	1.00	1	1	-5.72	-5.72	-5.72	57	100	37
51272	positive regulation of cellular component movement	158	48	45	43	0.94	0.90	1	1	-20.00	-20.00	-20.00	100	100	100
51310	metaphase plate congression	20	5	5	2	1.00	0.40	1	0	-9.06	-9.06	-3.88	99	85	97
51928	positive regulation of calcium ion transport	23	4	2	4	0.50	1.00	0	1	-6.63	-3.52	-6.63	61	100	51
51983	regulation of chromosome segregation	20	3	3	1	1.00	0.33	1	0	-5.52	-5.52	-2.37	66	22	56
60249	anatomical structure homeostasis	83	26	21	17	0.81	0.65	1	1	-20.00	-20.00	-12.37	100	100	100
60485	mesenchyme development	65	9	9	4	1.00	0.44	1	0	-6.81	-6.81	-2.37	77	16	44
60537	muscle tissue development	76	23	23	9	1.00	0.39	1	1	-20.00	-20.00	-5.59	100	100	100
60562	epithelial tube morphogenesis	97	16	16	7	1.00	0.44	1	0	-9.27	-9.27	-2.56	99	36	81
60840	artery development	28	9	8	4	0.89	0.44	1	1	-13.92	-12.19	-5.78	100	100	100
60993	kidney morphogenesis	28	5	5	2	1.00	0.40	1	0	-7.29	-7.29	-3.01	87	38	75
61448	connective tissue development	58	11	10	10	0.91	0.91	1	1	-10.02	-8.85	-8.85	100	100	90
71897	DNA biosynthetic process	43	8	7	4	0.88	0.50	1	0	-8.86	-7.55	-3.97	97	57	84
72006	nephron development	41	8	8	3	1.00	0.38	1	0	-9.22	-9.22	-3.07	99	73	95
72028	nephron morphogenesis	21	3	3	1	1.00	0.33	1	0	-5.34	-5.34	-2.29	69	18	50
72073	kidney epithelium development	41	8	8	4	1.00	0.50	1	0	-9.22	-9.22	-4.17	100	93	94
72078	nephron tubule morphogenesis	20	3	3	1	1.00	0.33	1	0	-5.52	-5.52	-2.37	69	18	50
72080	nephron tubule development	25	4	4	1	1.00	0.25	1	0	-6.27	-6.27	-1.99	61	8	47
72088	nephron epithelium morphogenesis	21	3	3	1	1.00	0.33	1	0	-5.34	-5.34	-2.29	69	18	50
90068	positive regulation of cell cycle process	72	9	9	5	1.00	0.56	1	0	-6.00	-6.00	-2.69	37	2	19
90092	regulation of transmembrane receptor protein serine/threonine kinase signaling pathway	83	13	13	13	1.00	1.00	1	1	-8.40	-8.40	-8.40	98	100	78
90287	regulation of cellular response to growth factor stimulus	89	21	21	20	1.00	0.95	1	1	-15.48	-15.48	-14.41	100	100	100
97006	regulation of plasma lipoprotein particle levels	22	7	7	7	1.00	1.00	1	1	-12.20	-12.20	-12.20	100	100	99
97193	intrinsic apoptotic signaling pathway	54	9	8	6	0.89	0.67	1	0	-8.31	-7.16	-5.00	98	84	81
98742	cell-cell adhesion via plasma-membrane adhesion molecules	37	7	7	7	1.00	1.00	1	1	-8.57	-8.57	-8.57	97	100	85
1901342	regulation of vasculature development	81	15	13	12	0.87	0.80	1	1	-10.64	-8.67	-7.73	100	100	93
1903510	mucopolysaccharide metabolic process	36	5	5	4	1.00	0.80	1	0	-5.99	-5.99	-4.71	45	47	33
1903844	regulation of cellular response to transforming growth factor beta stimulus	42	6	6	6	1.00	1.00	1	1	-6.44	-6.44	-6.44	49	100	29
1904018	positive regulation of vasculature development	48	7	7	7	1.00	1.00	1	1	-6.82	-6.82	-6.82	85	100	52
2000147	positive regulation of cell motility	151	45	44	40	0.98	0.89	1	1	-20.00	-20.00	-20.00	100	100	100
