# Supplementary material for: Differential coexpression in human tissues and the confounding effect of mean expression levels
Source: Bioinformatics. 2018 Jul 3;35(1):55–61. doi: 10.1093/bioinformatics/bty538 (PMC6298061; doi:10.1093/bioinformatics/bty538)
Supplement: Supplementary Data [file bty538_suppl_data.zip › skeletalMuscle_TSExclusiveDiseaseTerms_linkRemoval.txt]

DOID	Name	geneCount	linkCount(lc)	lc_minusPurLinks	lc_minusExpressionInducedLinks	1-ratioOfPureLinks	1-RatioOfExpressionInducedLinks	SigAfterPureRemoval	SigAfterExpressionInducedRemoval	log10Pvalue_plus1e-20	log10PvalueAfterPureRemoval_plus1e-20	log10PvalueAfterEIremovalplus1e-20	significantCountIn100_randomPureLinkRemoval	significantCountIn100_randomEILinkRemoval
2747	glycogen storage disease	11	3	3	1	1.00	0.33	1	0	-8.07	-8.07	-3.63	98	64
3191	nemaline myopathy	9	2	2	1	1.00	0.50	1	0	-6.34	-6.34	-4.00	85	31
11984	hypertrophic cardiomyopathy	76	19	19	6	1.00	0.32	1	0	-20.00	-20.00	-3.74	100	92
