# Supplementary material for: Differential coexpression in human tissues and the confounding effect of mean expression levels
Source: Bioinformatics. 2018 Jul 3;35(1):55–61. doi: 10.1093/bioinformatics/bty538 (PMC6298061; doi:10.1093/bioinformatics/bty538)
Supplement: Supplementary Data [file bty538_suppl_data.zip › skeletalMuscle_TSExclusiveFunctionTerms_linkRemoval.txt]

functionID	functionName	geneCount	linkCount(lc)	lc_minusPurLinks	lc_minusExpressionInducedLinks	1-ratioOfPureLinks	1-RatioOfExpressionInducedLinks	SigAfterPureRemoval	SigAfterExpressionInducedRemoval	log10Pvalue_plus1e-20	log10PvalueAfterPureRemoval_plus1e-20	log10PvalueAfterEIremovalplus1e-20	significantCountIn100_randomPureLinkRemoval	significantCountIn100_randomEILinkRemoval
10927	cellular component assembly involved in morphogenesis	34	5	5	1	1.00	0.20	1	0	-6.85	-6.85	-1.66	91	31
30239	myofibril assembly	26	5	5	1	1.00	0.20	1	0	-8.24	-8.24	-2.11	91	31
31032	actomyosin structure organization	34	6	6	2	1.00	0.33	1	0	-8.35	-8.35	-2.80	96	58
51146	striated muscle cell differentiation	71	9	9	2	1.00	0.22	1	0	-6.98	-6.98	-1.10	81	5
55001	muscle cell development	62	12	12	2	1.00	0.17	1	0	-11.69	-11.69	-1.38	100	63
55002	striated muscle cell development	55	9	9	2	1.00	0.22	1	0	-9.07	-9.07	-1.65	99	43
70252	actin-mediated cell contraction	33	4	4	0	1.00	0.00	1	0	-5.54	-5.54	-0.72	67	16
90257	regulation of muscle system process	58	8	8	2	1.00	0.25	1	0	-7.44	-7.44	-1.53	96	27
