# Supplementary material for: Differential coexpression in human tissues and the confounding effect of mean expression levels
Source: Bioinformatics. 2018 Jul 3;35(1):55–61. doi: 10.1093/bioinformatics/bty538 (PMC6298061; doi:10.1093/bioinformatics/bty538)
Supplement: Supplementary Data [file bty538_suppl_data.zip › TSlinksTSS_blood_pureLinks_GTEx_exp.csv]

gene_A	gene_B	blood_corr	brain_cortex_corr	liver_corr	lung_corr	skeletalMuscle_corr	GTExTSS	gA_bloodExp	gB_bloodExp	gA_brainExp	gB_brainExp	gA_liverExp	gB_liverExp	gA_lungExp	gB_lungExp	gA_muscleExp	gB_muscleExp
ABCC3	ABLIM3	718	478	914	404	518	0.318	10.18	9.59	5.37	11.06	14.13	13.51	11.09	11.40	5.97	11.98
ABHD14B	ACBD6	970	551	756	972	913	0.345	11.14	9.47	8.89	9.15	12.70	8.86	10.67	9.20	9.88	9.75
ACOT9	ACSL5	793	633	716	904	896	0.118	11.15	10.94	8.73	8.33	9.56	12.76	10.94	11.40	10.62	8.25
ACTR8	ADIPOR2	986	625	644	641	945	0.544	9.63	11.66	8.79	11.71	8.80	12.99	8.73	12.53	9.29	11.90
ACSL1	ADM	832	504	67	580	84	0.622	16.81	12.97	10.48	7.41	15.79	10.45	14.09	12.16	15.03	10.85
ABHD14B	ADSL	665	609	491	882	697	0.111	11.14	10.59	8.89	9.07	12.70	10.19	10.67	9.86	9.88	12.92
ABTB1	AGTRAP	1000	4	886	815	928	0.435	14.76	13.34	12.04	7.84	10.34	9.28	11.46	10.87	11.23	10.06
AGPAT3	AIMP2	948	924	798	959	882	0.120	11.40	8.43	12.76	6.79	12.71	8.54	11.53	7.07	12.78	10.85
AC018766.5	AK1	471	571	823	752	514	0.000	10.02	10.63	6.79	11.71	8.40	10.92	8.34	11.47	7.71	13.90
ACAA1	ALDOA	853	832	38	930	711	0.258	12.55	16.43	10.95	16.81	14.06	13.08	10.97	14.97	10.62	17.22
ACSS2	ALDOA	805	644	40	861	487	0.386	11.19	16.43	10.40	16.81	12.50	13.08	12.02	14.97	12.83	17.22
ACSS2	AMICA1	957	132	75	614	624	0.795	11.19	13.99	10.40	3.15	12.50	8.01	12.02	10.35	12.83	5.76
AFG3L1P	ANGEL2	977	786	819	937	978	0.195	9.68	9.56	9.63	10.17	10.10	9.92	9.80	9.96	9.89	10.10
ADAMTS13	ANGPTL4	632	87	58	14	49	0.264	6.87	6.89	9.94	9.56	11.74	12.55	7.15	9.98	8.50	9.43
ADM2	ANGPTL4	4	279	154	167	47	0.000	7.40	6.89	1.69	9.56	8.04	12.55	5.14	9.98	1.85	9.43
AMZ1	ANGPTL4	556	330	68	62	47	0.112	4.22	6.89	7.73	9.56	4.85	12.55	4.21	9.98	2.29	9.43
AGPAT5	ANKRD40	974	576	802	885	637	0.498	8.44	9.25	10.27	11.77	9.65	10.05	8.52	10.65	10.05	12.61
ABLIM3	ANKRD9	42	188	310	236	73	0.000	9.59	9.54	11.06	9.53	13.51	8.69	11.40	8.50	11.98	11.85
ACLY	AOAH	878	670	346	360	519	0.661	11.68	12.91	11.40	4.85	11.29	7.34	12.19	8.81	10.58	4.97
ACSS2	AOAH	852	610	207	185	538	0.630	11.19	12.91	10.40	4.85	12.50	7.34	12.02	8.81	12.83	4.97
ABCB7	AP3M1	863	957	984	981	915	0.000	9.66	10.63	7.83	9.27	9.72	10.50	9.15	10.35	10.74	10.31
ABHD2	APAF1	974	840	774	768	411	0.507	12.85	11.23	11.72	9.29	13.66	8.35	12.41	9.42	11.64	8.95
AP1G2	APEH	905	492	388	878	773	0.484	11.36	11.53	10.84	11.27	9.27	11.97	9.95	10.92	7.34	12.44
ACOT9	APLP2	863	925	853	958	955	0.005	11.15	14.29	8.73	14.14	9.56	14.20	10.94	15.53	10.62	12.35
A4GALT	APOE	796	505	29	158	692	0.493	6.53	8.26	6.93	14.36	6.85	16.57	10.08	12.62	9.81	8.73
ADAMTS13	APOE	568	221	594	291	759	0.068	6.87	8.26	9.94	14.36	11.74	16.57	7.15	12.62	8.50	8.73
APLP2	ARAP1	899	346	822	801	774	0.349	14.29	14.17	14.14	11.21	14.20	11.58	15.53	13.05	12.35	10.46
ACSS2	ARAP3	901	564	26	138	880	0.580	11.19	12.08	10.40	9.57	12.50	8.91	12.02	11.99	12.83	9.57
AMPD2	ARAP3	468	451	459	626	765	0.000	12.96	12.08	12.36	9.57	11.59	8.91	11.04	11.99	8.62	9.57
ARAP1	ARAP3	996	543	939	726	922	0.427	14.17	12.08	11.21	9.57	11.58	8.91	13.05	11.99	10.46	9.57
AIMP2	ARHGAP17	853	651	766	179	765	0.365	8.43	10.30	6.79	8.56	8.54	9.51	7.07	10.59	10.85	10.67
ABHD2	ARHGAP26	985	887	387	746	749	0.529	12.85	13.29	11.72	11.84	13.66	9.41	12.41	11.19	11.64	10.63
ACAP2	ARHGAP26	976	680	812	797	712	0.452	12.24	13.29	10.03	11.84	10.04	9.41	11.14	11.19	9.89	10.63
AGTPBP1	ARHGAP26	969	899	914	941	514	0.304	12.39	13.29	10.71	11.84	8.67	9.41	10.76	11.19	10.43	10.63
AP3D1	ARHGAP30	954	136	800	914	661	0.470	12.01	14.26	12.88	5.78	12.88	8.61	12.73	11.40	12.73	7.30
AP2A2	ARHGAP4	981	483	813	766	970	0.438	11.52	14.14	12.91	8.55	12.19	9.65	12.23	12.18	11.17	8.61
ACD	ARHGEF1	990	547	993	982	999	0.226	10.31	14.49	10.16	11.05	8.50	11.85	8.98	13.40	8.83	10.56
ACSL1	ARHGEF11	954	400	574	444	815	0.714	16.81	11.85	10.48	12.40	15.79	11.19	14.09	11.69	15.03	11.19
ARAP3	ARHGEF11	984	474	898	763	736	0.519	12.08	11.85	9.57	12.40	8.91	11.19	11.99	11.69	9.57	11.19
A4GALT	ARHGEF37	723	192	56	254	130	0.446	6.53	7.59	6.93	10.09	6.85	7.97	10.08	8.61	9.81	10.94
ANGPTL4	ARHGEF37	353	197	28	3	39	0.000	6.89	7.59	9.56	10.09	12.55	7.97	9.98	8.61	9.43	10.94
ARHGEF37	ARMC5	80	356	721	623	422	0.000	7.59	9.31	10.09	9.74	7.97	10.71	8.61	8.74	10.94	10.26
ACO2	ARPC1B	113	438	959	980	98	0.000	10.98	13.85	13.28	7.87	11.13	10.77	10.79	12.41	14.13	8.85
AATF	ARRB1	911	593	586	884	375	0.540	11.41	11.24	9.68	11.27	9.81	8.65	10.30	11.25	10.80	8.61
ACLY	ARRB1	879	799	647	889	788	0.202	11.68	11.24	11.40	11.27	11.29	8.65	12.19	11.25	10.58	8.61
ANGPTL4	ARVCF	677	41	179	21	12	0.354	6.89	8.42	9.56	10.55	12.55	10.60	9.98	9.57	9.43	9.93
ARHGEF37	ARVCF	363	283	551	889	430	0.000	7.59	8.42	10.09	10.55	7.97	10.60	8.61	9.57	10.94	9.93
ACSL1	ASAP1	916	598	148	760	316	0.653	16.81	12.51	10.48	11.04	15.79	9.80	14.09	12.25	15.03	10.57
AGL	ASB1	859	676	21	880	414	0.451	9.09	10.59	9.71	11.20	11.84	10.02	9.35	10.28	13.50	11.55
ABHD14A	ATIC	994	776	543	760	175	0.699	8.84	10.39	10.56	10.72	8.95	10.81	7.80	10.26	9.20	11.27
ABHD14B	ATIC	1000	619	331	812	724	0.672	11.14	10.39	8.89	10.72	12.70	10.81	10.67	10.26	9.88	11.27
ANKRD40	ATP5G3	876	150	930	869	289	0.380	9.25	11.42	11.77	12.34	10.05	13.03	10.65	11.62	12.61	13.28
ANP32E	ATP5G3	822	365	935	867	295	0.322	10.69	11.42	10.99	12.34	10.57	13.03	10.58	11.62	11.07	13.28
ATL3	ATP5G3	919	271	696	937	44	0.530	11.01	11.42	9.69	12.34	11.60	13.03	12.12	11.62	10.15	13.28
ARAP1	ATP6V0B	968	485	892	945	649	0.443	14.17	13.65	11.21	12.20	11.58	12.06	13.05	12.02	10.46	11.51
ARHGEF40	ATP6V0B	968	47	95	574	894	0.702	12.31	13.65	10.53	12.20	12.32	12.06	11.68	12.02	10.77	11.51
ASB1	ATR	812	863	908	931	844	0.000	10.59	9.59	11.20	9.64	10.02	10.15	10.28	9.93	11.55	9.68
ACSL1	B4GALT5	981	564	316	792	526	0.771	16.81	12.86	10.48	10.64	15.79	11.05	14.09	11.83	15.03	12.62
ATL3	BAG4	992	488	395	955	883	0.565	11.01	9.60	9.69	10.30	11.60	9.99	12.12	8.48	10.15	8.91
ACSL1	BASP1	992	233	236	761	74	0.854	16.81	14.45	10.48	14.01	15.79	8.06	14.09	10.34	15.03	6.68
B3GALT4	BATF	981	54	717	523	458	0.842	10.45	10.50	6.91	1.72	5.94	5.46	7.94	6.71	6.97	3.89
ANAPC1	BBS2	934	472	899	884	822	0.316	9.84	9.50	9.97	12.03	9.78	9.46	9.80	9.93	10.50	11.15
ABCF2	BCAT2	996	282	145	753	593	0.819	10.66	9.36	11.35	9.45	10.03	9.88	10.65	10.18	12.40	10.83
AATF	BCKDHA	974	706	954	969	231	0.384	11.41	11.37	9.68	10.50	9.81	12.08	10.30	10.21	10.80	12.04
ACYP1	BCKDHB	906	444	75	864	720	0.520	7.01	7.73	8.42	9.20	6.82	11.25	7.49	8.39	8.69	8.89
ARAP3	BCL6	852	661	766	360	266	0.490	12.08	15.42	9.57	11.51	8.91	12.59	11.99	13.82	9.57	14.96
ARHGEF11	BCL6	977	188	791	522	754	0.670	11.85	15.42	12.40	11.51	11.19	12.59	11.69	13.82	11.19	14.96
ATP11A	BCL6	992	713	806	378	483	0.725	11.64	15.42	10.03	11.51	10.95	12.59	12.72	13.82	10.74	14.96
BASP1	BCL6	972	30	786	814	382	0.644	14.45	15.42	14.01	11.51	8.06	12.59	10.34	13.82	6.68	14.96
BCL6	BEST1	785	555	920	730	758	0.156	15.42	12.24	11.51	9.62	12.59	7.77	13.82	10.03	14.96	7.30
ACAA1	BID	990	781	627	912	450	0.570	12.55	12.04	10.95	10.93	14.06	10.48	10.97	9.27	10.62	10.15
BCAS4	BIN1	986	575	838	753	322	0.639	8.37	11.42	8.39	13.38	4.83	10.84	5.57	10.41	5.33	15.53
ANGPTL4	BIRC7	0	483	0	19	0	0.000	6.89	3.02	9.56	1.92	12.55	1.21	9.98	3.52	9.43	1.53
ABCE1	BLCAP	916	873	179	854	658	0.390	9.41	10.88	9.86	12.78	10.65	12.32	10.36	11.10	11.08	14.05
ANKRD40	BLCAP	952	105	568	943	640	0.579	9.25	10.88	11.77	12.78	10.05	12.32	10.65	11.10	12.61	14.05
AP3M1	BLCAP	999	733	567	993	802	0.451	10.63	10.88	9.27	12.78	10.50	12.32	10.35	11.10	10.31	14.05
BCCIP	BLCAP	941	638	481	962	807	0.439	9.67	10.88	9.87	12.78	10.40	12.32	9.72	11.10	11.07	14.05
BCL2L1	BLVRB	814	678	497	939	611	0.327	13.65	12.84	12.01	9.31	12.21	12.20	12.90	11.05	11.39	11.62
ACSS1	BMS1	999	53	721	554	273	0.861	11.00	10.14	12.16	10.39	9.81	10.60	11.33	10.80	11.58	11.65
ANGPTL4	BRF1	610	40	632	40	245	0.165	6.89	10.58	9.56	11.45	12.55	10.62	9.98	10.31	9.43	10.60
APOE	BRF1	509	144	599	424	809	0.009	8.26	10.58	14.36	11.45	16.57	10.62	12.62	10.31	8.73	10.60
ASGR2	BRI3	850	598	637	526	447	0.570	10.73	12.91	4.48	10.15	14.72	11.99	5.41	12.37	3.20	12.16
ANAPC11	BST2	930	408	840	546	875	0.479	10.49	11.68	10.76	9.06	11.07	12.22	10.08	11.65	11.53	9.64
ABHD14B	BZW2	926	332	181	515	338	0.845	11.14	9.81	8.89	9.33	12.70	9.12	10.67	9.84	9.88	12.65
ASB10	C10orf10	101	108	96	50	12	0.000	1.72	9.58	0.21	10.57	0.60	12.35	0.28	14.61	10.74	12.39
BLVRA	C10orf11	929	346	211	844	617	0.627	10.54	7.98	9.62	4.39	6.99	7.66	10.47	6.46	10.30	6.24
AKAP1	C10orf2	889	841	348	787	382	0.464	9.26	8.15	11.42	7.25	12.35	8.68	11.05	6.85	13.22	9.81
ACSS2	C10orf54	965	141	20	738	503	0.809	11.19	16.77	10.40	10.76	12.50	9.18	12.02	12.82	12.83	10.07
BRI3	C10orf54	955	514	261	869	383	0.719	12.91	16.77	10.15	10.76	11.99	9.18	12.37	12.82	12.16	10.07
AK2	C11orf31	968	394	981	979	987	0.234	11.59	10.44	10.23	11.01	12.60	11.48	11.53	10.56	11.78	10.69
ABHD14B	C12orf57	986	514	344	889	881	0.580	11.14	9.49	8.89	9.98	12.70	9.90	10.67	9.87	9.88	9.69
ABCE1	C12orf65	966	935	504	862	804	0.380	9.41	8.73	9.86	8.98	10.65	9.31	10.36	8.57	11.08	9.26
ANKRD13C	C12orf65	911	984	876	918	909	0.018	8.77	8.73	9.68	8.98	9.19	9.31	9.41	8.57	10.03	9.26
ANKRD46	C12orf65	951	977	834	944	782	0.146	7.77	8.73	10.73	8.98	10.25	9.31	8.45	8.57	10.73	9.26
AMMECR1L	C12orf73	935	879	933	924	567	0.218	9.81	7.11	9.17	7.89	10.48	7.68	10.14	6.79	10.00	9.06
BDH2	C12orf73	908	311	414	791	892	0.474	7.37	7.11	9.22	7.89	10.42	7.68	9.42	6.79	8.99	9.06
ANKRD40	C14orf1	941	308	517	837	642	0.634	9.25	9.34	11.77	10.11	10.05	11.73	10.65	10.12	12.61	9.19
BIN1	C14orf1	950	602	738	751	691	0.509	11.42	9.34	13.38	10.11	10.84	11.73	10.41	10.12	15.53	9.19
ARAP1	C15orf39	925	575	955	855	707	0.319	14.17	13.09	11.21	7.75	11.58	8.39	13.05	10.65	10.46	8.70
ATP6V0D1	C15orf39	818	387	920	948	616	0.260	13.64	13.09	12.71	7.75	11.55	8.39	12.10	10.65	12.12	8.70
BCKDK	C15orf39	824	534	578	922	523	0.418	12.01	13.09	10.53	7.75	11.86	8.39	10.42	10.65	11.67	8.70
ACAP1	C16orf58	495	138	474	260	894	0.000	13.89	10.36	5.01	11.02	8.36	11.83	10.03	10.83	7.66	9.43
ARHGAP4	C16orf58	808	518	555	717	947	0.317	14.14	10.36	8.55	11.02	9.65	11.83	12.18	10.83	8.61	9.43
AHCYL1	C17orf85	998	194	864	792	880	0.478	11.39	10.34	14.46	9.35	12.09	9.91	12.49	10.12	12.94	10.00
BCL6	C19orf59	938	790	905	315	636	0.461	15.42	13.16	11.51	2.26	12.59	4.81	13.82	10.23	14.96	3.80
ANKRD9	C1orf198	501	181	479	508	108	0.002	9.54	8.35	9.53	11.86	8.69	10.07	8.50	12.70	11.85	12.61
B3GALT6	C21orf33	967	942	917	999	134	0.271	9.31	11.06	9.63	11.96	9.68	13.57	8.61	11.08	9.29	12.80
BMS1	C2orf42	838	969	386	855	949	0.169	10.14	9.24	10.39	8.40	10.60	9.24	10.80	7.27	11.65	8.42
C10orf2	C2orf42	968	960	344	835	916	0.331	8.15	9.24	7.25	8.40	8.68	9.24	6.85	7.27	9.81	8.42
BCCIP	C2orf74	0	0	0	0	0	0.000	9.67	0.00	9.87	0.00	10.40	0.00	9.72	0.00	11.07	0.00
ANKRD40	C6orf203	901	482	938	899	698	0.303	9.25	7.69	11.77	8.35	10.05	9.24	10.65	6.94	12.61	9.56
C12orf45	C6orf48	983	580	840	745	963	0.402	7.38	11.18	6.16	11.00	7.77	10.46	6.39	11.84	7.36	10.56
ACAP1	C7orf26	936	375	705	308	545	0.747	13.89	10.93	5.01	9.64	8.36	9.92	10.03	9.82	7.66	10.09
ADSL	C9orf114	862	801	561	991	770	0.227	10.59	10.19	9.07	10.40	10.19	10.63	9.86	9.60	12.92	10.01
APEH	C9orf114	918	586	653	981	972	0.298	11.53	10.19	11.27	10.40	11.97	10.63	10.92	9.60	12.44	10.01
ATIC	C9orf114	992	753	464	950	881	0.442	10.39	10.19	10.72	10.40	10.81	10.63	10.26	9.60	11.27	10.01
C21orf33	C9orf114	959	876	663	993	470	0.419	11.06	10.19	11.96	10.40	13.57	10.63	11.08	9.60	12.80	10.01
AKR7A2	C9orf69	800	423	646	967	612	0.321	10.04	10.81	9.82	11.02	10.90	10.49	9.45	9.85	10.54	10.68
BRI3	C9orf72	533	454	443	184	821	0.050	12.91	11.94	10.15	9.98	11.99	9.54	12.37	11.09	12.16	10.28
BARD1	CAAP1	963	651	618	296	416	0.791	8.04	8.12	5.67	8.03	6.47	9.98	7.78	8.15	8.88	8.98
ANGPTL4	CACNG4	0	19	0	33	53	0.000	6.89	2.79	9.56	9.28	12.55	1.46	9.98	7.34	9.43	2.99
ATP6V1B2	CALCOCO2	737	129	998	803	991	0.118	13.91	12.24	13.89	10.94	11.51	12.12	12.98	12.92	12.08	12.94
ACAD9	CALHM2	943	802	691	851	767	0.331	9.99	10.76	10.13	8.09	10.59	7.57	9.91	10.13	10.81	8.90
AGPAT3	CALHM2	966	812	374	792	254	0.630	11.40	10.76	12.76	8.09	12.71	7.57	11.53	10.13	12.78	8.90
ARHGEF15	CAMK2B	405	37	4	79	728	0.000	5.01	5.38	7.32	14.04	7.90	9.15	11.17	3.76	9.68	12.91
ANGPTL4	CARD10	785	365	624	27	283	0.508	6.89	5.09	9.56	6.74	12.55	10.97	9.98	9.49	9.43	9.03
CAMK2B	CARD10	376	39	49	210	497	0.000	5.38	5.09	14.04	6.74	9.15	10.97	3.76	9.49	12.91	9.03
ACD	CARD11	772	509	596	657	601	0.362	10.31	11.46	10.16	5.61	8.50	7.09	8.98	8.31	8.83	4.64
AES	CARD11	992	606	635	646	206	0.790	13.66	11.46	15.75	5.61	13.74	7.09	14.46	8.31	14.44	4.64
C16orf58	CARD11	969	655	518	166	657	0.773	10.36	11.46	11.02	5.61	11.83	7.09	10.83	8.31	9.43	4.64
C9orf114	CARD11	929	391	447	268	524	0.846	10.19	11.46	10.40	5.61	10.63	7.09	9.60	8.31	10.01	4.64
BAG1	CARM1	856	894	946	969	811	0.022	12.43	11.29	11.10	11.57	10.95	10.93	11.37	10.73	12.53	12.69
ARHGAP30	CARS	977	292	607	631	474	0.835	14.26	11.75	5.78	10.81	8.61	10.78	11.40	10.75	7.30	10.89
ANGPTL4	CASZ1	442	706	759	5	227	0.000	6.89	8.90	9.56	5.17	12.55	7.92	9.98	10.33	9.43	11.33
ABHD2	CBL	993	989	652	708	567	0.528	12.85	12.51	11.72	10.31	13.66	9.16	12.41	11.07	11.64	9.55
AGO1	CBL	993	914	929	983	952	0.097	11.49	12.51	11.13	10.31	10.11	9.16	10.81	11.07	10.50	9.55
ATF6	CBL	992	975	892	781	933	0.194	12.13	12.51	9.93	10.31	11.16	9.16	11.34	11.07	10.69	9.55
AP5M1	CCAR1	950	869	953	907	822	0.126	9.81	10.12	9.09	10.75	9.79	11.14	9.05	11.47	10.10	11.55
CCAR1	CCBL2	896	725	872	938	934	0.098	10.12	10.32	10.75	9.10	11.14	9.55	11.47	9.33	11.55	8.74
ACYP2	CCDC109B	967	508	637	887	323	0.668	8.11	10.24	10.27	5.46	8.97	6.05	7.23	8.12	11.38	6.87
ALKBH7	CCDC109B	886	389	447	779	271	0.632	10.62	10.24	9.79	5.46	11.53	6.05	9.51	8.12	11.11	6.87
ANAPC16	CCDC109B	950	426	745	791	699	0.532	11.73	10.24	10.38	5.46	11.96	6.05	11.58	8.12	12.64	6.87
C12orf57	CCDC109B	842	429	840	659	765	0.302	9.49	10.24	9.98	5.46	9.90	6.05	9.87	8.12	9.69	6.87
CAMLG	CCDC109B	930	574	944	814	593	0.405	10.31	10.24	11.09	5.46	9.63	6.05	9.88	8.12	11.17	6.87
ANKRD40	CCDC115	972	340	822	924	531	0.555	9.25	10.40	11.77	10.47	10.05	9.37	10.65	9.70	12.61	9.05
BANF1	CCDC115	815	812	928	864	771	0.024	11.04	10.40	11.02	10.47	11.36	9.37	10.78	9.70	12.30	9.05
CALHM2	CCDC12	951	825	629	768	931	0.326	10.76	10.46	8.09	9.38	7.57	9.87	10.13	9.71	8.90	10.09
AHCYL1	CCDC132	969	50	897	593	809	0.538	11.39	9.03	14.46	10.28	12.09	9.11	12.49	9.04	12.94	10.08
ASB1	CCDC14	587	818	155	862	695	0.043	10.59	9.00	11.20	10.49	10.02	11.01	10.28	11.60	11.55	10.20
ARRDC1	CCDC86	704	835	104	471	828	0.204	12.27	8.66	10.55	8.09	11.36	8.38	11.60	7.98	9.88	9.88
BCKDHA	CCDC86	854	740	705	597	497	0.437	11.37	8.66	10.50	8.09	12.08	8.38	10.21	7.98	12.04	9.88
BZW2	CCDC91	961	962	968	658	657	0.303	9.81	8.89	9.33	9.83	9.12	9.19	9.84	8.98	12.65	10.37
ABCE1	CCNB1IP1	798	967	12	511	742	0.321	9.41	9.46	9.86	9.93	10.65	10.64	10.36	10.36	11.08	10.92
C15orf57	CCNB1IP1	447	943	49	648	833	0.000	9.31	9.46	7.99	9.93	8.16	10.64	7.95	10.36	9.28	10.92
CCDC109B	CCNB1IP1	899	670	240	515	703	0.604	10.24	9.46	5.46	9.93	6.05	10.64	8.12	10.36	6.87	10.92
CCNB1IP1	CCNC	630	952	258	807	876	0.065	9.46	9.19	9.93	9.80	10.64	11.46	10.36	10.03	10.92	9.67
ARPP19	CCNG1	921	497	668	952	835	0.380	11.60	10.75	13.95	9.88	11.53	11.65	12.49	11.03	13.18	12.46
C14orf169	CCNG1	101	108	96	50	47	0.000	0.00	10.75	0.00	9.88	0.00	11.65	0.00	11.03	0.00	12.46
AP5M1	CCP110	984	630	734	854	892	0.413	9.81	9.50	9.09	10.63	9.79	8.53	9.05	9.59	10.10	9.45
ARID2	CCSER2	761	773	961	920	769	0.000	10.18	10.75	8.66	11.41	9.41	10.15	10.15	11.24	10.06	12.40
ASMTL	CCT3	753	786	588	764	857	0.083	10.73	11.84	10.16	12.29	10.26	12.53	9.58	12.15	9.92	12.75
AHCYL1	CCT5	959	100	1000	813	988	0.302	11.39	11.67	14.46	10.75	12.09	10.87	12.49	11.38	12.94	12.09
ABCB7	CCT6A	993	796	944	906	889	0.218	9.66	11.14	7.83	11.85	9.72	11.72	9.15	12.04	10.74	12.86
AK6	CCT6P3	101	108	96	50	47	0.000	0.00	9.29	0.00	8.18	0.00	8.83	0.00	8.47	0.00	8.38
BCL7A	CD22	909	40	223	452	113	0.818	7.86	10.95	10.79	9.84	9.09	6.06	8.53	8.08	10.10	4.59
ARHGEF11	CD300LB	443	91	752	597	168	0.000	11.85	10.91	12.40	1.37	11.19	3.67	11.69	5.55	11.19	2.62
CAPN1	CD4	213	270	113	803	522	0.000	13.02	12.14	12.18	8.27	12.28	11.68	12.76	12.30	12.28	7.15
CD22	CD40	922	128	758	229	270	0.715	10.95	9.40	9.84	6.30	6.06	9.22	8.08	10.51	4.59	8.76
CARD11	CDC25B	993	563	378	395	645	0.882	11.46	11.88	5.61	11.52	7.09	11.00	8.31	13.12	4.64	9.78
ABHD2	CDK19	987	485	517	671	306	0.880	12.85	10.50	11.72	10.88	13.66	9.21	12.41	9.32	11.64	9.20
ACOX1	CDK19	951	475	795	892	814	0.402	12.20	10.50	10.77	10.88	13.29	9.21	10.86	9.32	11.83	9.20
ARHGAP26	CDK19	971	563	508	366	536	0.888	13.29	10.50	11.84	10.88	9.41	9.21	11.19	9.32	10.63	9.20
BICD2	CDK19	994	679	815	817	977	0.344	11.56	10.50	10.60	10.88	10.01	9.21	11.23	9.32	11.16	9.20
ABHD14A	CDK4	993	527	647	822	200	0.738	8.84	9.61	10.56	8.57	8.95	9.68	7.80	10.22	9.20	9.93
ATPAF1	CDK4	684	699	940	961	339	0.092	9.86	9.61	12.33	8.57	11.43	9.68	9.78	10.22	12.53	9.93
BATF3	CDKN1C	934	356	532	6	43	0.852	7.10	8.97	6.62	8.57	5.49	7.84	7.22	9.89	5.38	10.60
ACSL1	CEACAM3	611	110	87	443	43	0.222	16.81	12.31	10.48	1.33	15.79	4.69	14.09	6.04	15.03	2.77
ARAP1	CEACAM3	873	83	683	525	493	0.642	14.17	12.31	11.21	1.33	11.58	4.69	13.05	6.04	10.46	2.77
ARAP3	CEACAM3	873	272	669	602	387	0.611	12.08	12.31	9.57	1.33	8.91	4.69	11.99	6.04	9.57	2.77
BCL6	CEACAM3	583	493	573	571	285	0.094	15.42	12.31	11.51	1.33	12.59	4.69	13.82	6.04	14.96	2.77
ALDOA	CEBPA	344	410	40	540	34	0.000	16.43	6.26	16.81	1.59	13.08	6.52	14.97	2.61	17.22	4.42
ARRB1	CEBPA	496	251	414	713	351	0.000	11.24	6.26	11.27	1.59	8.65	6.52	11.25	2.61	8.61	4.42
ACAP2	CEBPB	641	236	441	497	654	0.211	12.24	13.99	10.03	9.38	10.04	13.22	11.14	12.98	9.89	12.77
ADAM9	CEBPB	777	524	269	570	676	0.419	11.05	13.99	10.09	9.38	9.58	13.22	12.86	12.98	11.22	12.77
APLP2	CEBPB	848	440	156	585	790	0.508	14.29	13.99	14.14	9.38	14.20	13.22	15.53	12.98	12.35	12.77
ASAH1	CEBPB	714	435	443	425	138	0.428	13.59	13.99	11.48	9.38	11.36	13.22	13.46	12.98	11.86	12.77
ATP6AP2	CEBPB	652	352	221	575	741	0.191	12.10	13.99	12.38	9.38	11.55	13.22	12.27	12.98	10.23	12.77
ATP6V0B	CEBPD	980	132	659	696	747	0.659	13.65	13.21	12.20	9.66	12.06	13.12	12.02	13.24	11.51	12.06
APOE	CEND1	212	160	155	205	384	0.000	8.26	4.79	14.36	13.85	16.57	3.53	12.62	2.48	8.73	3.58
AFG3L1P	CEPT1	962	855	430	948	986	0.291	9.68	10.18	9.63	8.48	10.10	10.10	9.80	9.81	9.89	9.06
AKAP11	CEPT1	966	851	974	965	976	0.058	9.71	10.18	12.22	8.48	10.48	10.10	11.26	9.81	10.48	9.06
ANAPC5	CEPT1	839	895	933	951	924	0.000	11.89	10.18	12.29	8.48	12.10	10.10	12.02	9.81	12.47	9.06
ANAPC7	CEPT1	947	885	878	977	990	0.066	10.64	10.18	10.89	8.48	10.54	10.10	10.46	9.81	11.06	9.06
ANKRD27	CEPT1	997	921	879	970	559	0.330	10.51	10.18	10.08	8.48	8.85	10.10	10.23	9.81	10.83	9.06
ALDOA	CERS2	573	324	759	906	81	0.073	16.43	11.73	16.81	10.11	13.08	13.35	14.97	12.00	17.22	9.89
ARPC1B	CES2	987	84	718	925	653	0.576	13.85	10.56	7.87	11.23	10.77	14.07	12.41	10.51	8.85	11.53
C1orf162	CES2	790	102	654	796	447	0.358	13.64	10.56	7.02	11.23	8.88	14.07	10.81	10.51	8.91	11.53
ARHGEF37	CFB	349	367	237	85	215	0.000	7.59	6.78	10.09	7.18	7.97	16.43	8.61	11.30	10.94	7.74
C14orf169	CFL2	101	108	96	50	47	0.000	0.00	7.83	0.00	11.08	0.00	11.89	0.00	10.71	0.00	14.42
APAF1	CFLAR	979	238	898	845	612	0.530	11.23	14.14	9.29	10.79	8.35	12.55	9.42	14.34	8.95	13.98
ABHD10	CHD1L	885	698	684	855	529	0.387	9.39	10.46	10.13	10.28	10.64	11.33	8.78	10.64	9.44	10.31
ARHGEF9	CHD1L	967	374	562	796	619	0.696	9.21	10.46	13.15	10.28	8.97	11.33	9.44	10.64	8.78	10.31
ARAP1	CHMP2A	925	689	946	910	889	0.143	14.17	12.87	11.21	11.32	11.58	11.57	13.05	11.39	10.46	11.82
CEACAM3	CHMP2A	868	117	434	300	514	0.729	12.31	12.87	1.33	11.32	4.69	11.57	6.04	11.39	2.77	11.82
C21orf59	CHMP4A	974	599	990	942	999	0.203	9.64	11.33	10.66	10.53	10.31	10.10	10.22	10.35	10.55	9.72
BAG3	CHMP7	75	11	750	348	952	0.000	10.13	11.15	10.80	10.57	10.72	10.41	11.79	10.32	14.54	11.08
ANGPTL4	CHRNB2	3	1	80	73	111	0.000	6.89	4.72	9.56	10.87	12.55	3.02	9.98	1.84	9.43	2.52
ARPC5L	CHST12	896	787	611	453	976	0.395	10.88	10.06	11.60	8.52	10.90	8.20	10.85	9.17	11.00	8.69
C1orf21	CHST12	998	664	682	840	657	0.575	9.70	10.06	12.35	8.52	10.82	8.20	11.47	9.17	13.62	8.69
ACSL1	CHST15	989	471	278	796	886	0.637	16.81	13.55	10.48	10.43	15.79	10.27	14.09	11.18	15.03	10.36
ARAP1	CHST15	984	319	741	767	16	0.714	14.17	13.55	11.21	10.43	11.58	10.27	13.05	11.18	10.46	10.36
ARHGEF11	CHST15	968	946	796	848	690	0.296	11.85	13.55	12.40	10.43	11.19	10.27	11.69	11.18	11.19	10.36
ATP6V0B	CHST15	955	963	653	853	717	0.321	13.65	13.55	12.20	10.43	12.06	10.27	12.02	11.18	11.51	10.36
B4GALT5	CHST15	958	954	518	586	460	0.637	12.86	13.55	10.64	10.43	11.05	10.27	11.83	11.18	12.62	10.36
BCL6	CHST15	972	191	646	775	628	0.669	15.42	13.55	11.51	10.43	12.59	10.27	13.82	11.18	14.96	10.36
CFLAR	CHST15	983	13	846	664	433	0.711	14.14	13.55	10.79	10.43	12.55	10.27	14.34	11.18	13.98	10.36
CCT6A	CHTF8	823	936	798	917	987	0.013	11.14	9.86	11.85	8.46	11.72	9.75	12.04	8.61	12.86	8.99
ADH5	CIAPIN1	993	497	594	974	808	0.548	10.47	10.19	11.15	10.37	12.91	10.27	12.18	9.97	11.72	10.77
C9orf114	CIAPIN1	939	703	664	955	778	0.336	10.19	10.19	10.40	10.37	10.63	10.27	9.60	9.97	10.01	10.77
ABHD14B	CIRH1A	993	391	168	561	420	0.956	11.14	9.74	8.89	10.10	12.70	9.84	10.67	9.82	9.88	11.51
BIN1	CIRH1A	970	625	310	859	574	0.661	11.42	9.74	13.38	10.10	10.84	9.84	10.41	9.82	15.53	11.51
CCDC109B	CIRH1A	973	583	832	698	337	0.639	10.24	9.74	5.46	10.10	6.05	9.84	8.12	9.82	6.87	11.51
ACSL1	CKAP4	923	435	367	681	425	0.755	16.81	12.66	10.48	9.58	15.79	10.97	14.09	11.53	15.03	10.05
AGTRAP	CKAP4	973	47	818	877	915	0.391	13.34	12.66	7.84	9.58	9.28	10.97	10.87	11.53	10.06	10.05
BRI3	CKAP4	858	782	271	671	857	0.311	12.91	12.66	10.15	9.58	11.99	10.97	12.37	11.53	12.16	10.05
C19orf59	CKAP4	995	265	920	551	483	0.754	13.16	12.66	2.26	9.58	4.81	10.97	10.23	11.53	3.80	10.05
CD55	CKAP4	964	592	898	554	650	0.581	14.40	12.66	8.51	9.58	9.66	10.97	13.73	11.53	12.15	10.05
CEBPB	CKAP4	650	510	130	613	691	0.164	13.99	12.66	9.38	9.58	13.22	10.97	12.98	11.53	12.77	10.05
CHMP2A	CKAP4	863	923	916	856	953	0.004	12.87	12.66	11.32	9.58	11.57	10.97	11.39	11.53	11.82	10.05
ANKRD9	CLDN5	191	501	114	779	677	0.000	9.54	8.86	9.53	11.66	8.69	8.57	8.50	13.95	11.85	11.16
C1orf198	CLDN5	623	769	557	543	26	0.135	8.35	8.86	11.86	11.66	10.07	8.57	12.70	13.95	12.61	11.16
ALDH2	CLMN	847	125	506	645	338	0.619	12.31	10.84	14.12	10.48	15.62	11.83	13.79	10.61	13.17	10.19
ACSS1	CLPTM1L	871	47	897	739	412	0.437	11.00	11.35	12.16	10.83	9.81	12.89	11.33	12.10	11.58	10.50
ANKRD9	CLU	98	334	159	373	234	0.000	9.54	12.76	9.53	18.59	8.69	16.43	8.50	14.68	11.85	10.77
ARHGAP21	CLU	435	45	554	755	460	0.000	9.38	12.76	14.24	18.59	11.04	16.43	12.38	14.68	11.93	10.77
ABCE1	CLUAP1	959	946	692	701	793	0.352	9.41	8.44	9.86	9.88	10.65	8.26	10.36	8.83	11.08	9.37
BZW2	CMPK1	962	845	917	802	65	0.392	9.81	10.88	9.33	11.51	9.12	13.33	9.84	12.28	12.65	12.18
ATP5SL	CMTM7	965	114	883	828	264	0.575	10.68	11.80	10.44	4.61	10.56	7.65	10.55	10.12	11.19	7.08
BCKDHA	CMTM7	941	193	621	865	546	0.616	11.37	11.80	10.50	4.61	12.08	7.65	10.21	10.12	12.04	7.08
C21orf91	CNOT7	992	287	869	918	893	0.394	9.55	10.63	7.59	10.47	8.42	10.57	8.66	10.28	8.42	11.47
ARHGAP17	COG2	978	787	855	327	937	0.416	10.30	9.65	8.56	9.52	9.51	9.51	10.59	9.29	10.67	10.44
CEPT1	COG2	948	947	894	977	951	0.028	10.18	9.65	8.48	9.52	10.10	9.51	9.81	9.29	9.06	10.44
ACO2	COG4	704	732	877	912	795	0.000	10.98	11.30	13.28	10.82	11.13	11.18	10.79	10.69	14.13	11.78
ANKRD40	COG6	949	336	949	957	787	0.305	9.25	8.43	11.77	9.49	10.05	9.22	10.65	8.63	12.61	9.29
ADM2	COL1A1	36	460	554	531	47	0.000	7.40	8.40	1.69	6.87	8.04	11.90	5.14	14.71	1.85	10.66
ARHGEF15	COL1A1	674	472	764	218	720	0.174	5.01	8.40	7.32	6.87	7.90	11.90	11.17	14.71	9.68	10.66
ARVCF	COL1A1	536	222	573	215	875	0.036	8.42	8.40	10.55	6.87	10.60	11.90	9.57	14.71	9.93	10.66
BIRC7	COL1A1	101	207	96	294	47	0.000	3.02	8.40	1.92	6.87	1.21	11.90	3.52	14.71	1.53	10.66
CAMK2B	COL1A1	337	29	16	118	654	0.000	5.38	8.40	14.04	6.87	9.15	11.90	3.76	14.71	12.91	10.66
CEND1	COL1A1	175	17	390	379	241	0.000	4.79	8.40	13.85	6.87	3.53	11.90	2.48	14.71	3.58	10.66
CHDH	COL1A1	350	290	158	288	92	0.000	6.05	8.40	10.17	6.87	12.42	11.90	7.98	14.71	9.09	10.66
CHRNB2	COL1A1	24	27	177	236	226	0.000	4.72	8.40	10.87	6.87	3.02	11.90	1.84	14.71	2.52	10.66
ANGPTL4	COL26A1	0	34	8	64	0	0.000	6.89	2.55	9.56	10.71	12.55	7.94	9.98	3.11	9.43	1.06
AMN	COL6A1	659	469	330	122	47	0.318	6.00	8.83	2.33	12.83	10.81	13.28	6.42	15.30	1.97	12.76
BIRC7	COL6A1	101	151	96	331	47	0.000	3.02	8.83	1.92	12.83	1.21	13.28	3.52	15.30	1.53	12.76
CHRNB2	COL6A1	41	502	423	206	278	0.000	4.72	8.83	10.87	12.83	3.02	13.28	1.84	15.30	2.52	12.76
COL26A1	COL6A1	101	504	120	357	47	0.000	2.55	8.83	10.71	12.83	7.94	13.28	3.11	15.30	1.06	12.76
BCKDK	COLGALT1	891	711	693	994	296	0.385	12.01	12.94	10.53	10.47	11.86	11.53	10.42	12.70	11.67	10.77
ANXA4	COMMD9	966	470	979	981	653	0.390	10.66	10.97	8.89	10.29	12.12	9.99	11.82	9.44	9.84	10.47
CMTM3	COMMD9	953	108	838	572	497	0.701	11.85	10.97	6.96	10.29	8.18	9.99	10.90	9.44	8.39	10.47
AKAP13	COPA	985	890	980	929	872	0.135	12.96	12.84	10.43	12.74	12.05	12.52	14.07	13.07	13.05	12.67
C10orf54	COPE	947	425	913	866	752	0.379	16.77	12.98	10.76	12.04	9.18	12.34	12.82	11.87	10.07	11.49
ABHD14B	COPS6	941	666	670	945	983	0.273	11.14	11.09	8.89	11.80	12.70	11.13	10.67	10.99	9.88	11.93
CECR1	COPS7A	421	88	892	851	738	0.000	12.68	10.62	8.62	12.11	8.51	11.35	11.37	10.90	8.12	11.91
BST2	COPZ1	955	307	720	392	791	0.654	11.68	11.99	9.06	11.40	12.22	12.03	11.65	11.91	9.64	11.73
BUB3	COQ10A	972	856	87	855	13	0.589	11.10	8.44	10.26	8.75	11.07	9.96	11.01	7.45	10.86	11.56
ACOX1	CORO1C	970	652	356	949	846	0.467	12.20	12.04	10.77	11.17	13.29	11.44	10.86	13.02	11.83	11.37
CEBPD	CORO1C	885	355	627	581	504	0.664	13.21	12.04	9.66	11.17	13.12	11.44	13.24	13.02	12.06	11.37
ADSL	COX20	761	789	901	112	898	0.131	10.59	10.48	9.07	11.34	10.19	10.96	9.86	11.33	12.92	11.71
ARRDC2	COX4I1	729	418	738	477	109	0.344	12.03	12.75	10.43	14.01	10.05	13.19	12.48	12.69	13.11	13.89
C4orf48	COX8A	907	724	886	864	506	0.324	7.94	11.93	8.06	12.12	4.49	11.91	4.56	11.29	3.35	13.09
ARHGEF37	CPNE7	235	175	240	235	0	0.000	7.59	5.46	10.09	10.02	7.97	5.73	8.61	5.30	10.94	1.93
AOAH	CPQ	932	368	845	655	802	0.463	12.91	12.17	4.85	8.78	7.34	10.38	8.81	10.49	4.97	8.81
ARHGAP26	CPQ	975	39	414	601	60	0.899	13.29	12.17	11.84	8.78	9.41	10.38	11.19	10.49	10.63	8.81
C10orf54	CPQ	987	832	794	599	834	0.445	16.77	12.17	10.76	8.78	9.18	10.38	12.82	10.49	10.07	8.81
CEBPB	CPQ	757	560	110	443	73	0.484	13.99	12.17	9.38	8.78	13.22	10.38	12.98	10.49	12.77	8.81
CLDN5	CRAT	614	567	298	442	399	0.195	8.86	10.59	11.66	11.50	8.57	13.38	13.95	10.06	11.16	13.49
CAMK2B	CREB3L1	187	670	12	57	466	0.000	5.38	5.09	14.04	7.19	9.15	5.61	3.76	9.57	12.91	7.41
ATP5B	CRELD2	957	680	636	940	301	0.536	13.74	10.11	14.91	9.30	14.35	11.55	14.31	10.15	15.46	9.29
ACOX1	CRISPLD2	1000	636	48	527	613	0.862	12.20	12.06	10.77	7.70	13.29	9.54	10.86	13.48	11.83	10.43
ARHGAP26	CRISPLD2	924	56	830	744	783	0.419	13.29	12.06	11.84	7.70	9.41	9.54	11.19	13.48	10.63	10.43
COMMD9	CRTAP	971	510	931	763	691	0.494	10.97	11.97	10.29	11.89	9.99	11.42	9.44	13.19	10.47	12.17
AGPAT3	CSF1R	723	416	432	895	80	0.335	11.40	12.11	12.76	9.05	12.71	8.78	11.53	11.19	12.78	8.26
BCKDHA	CSF1R	701	258	805	889	415	0.201	11.37	12.11	10.50	9.05	12.08	8.78	10.21	11.19	12.04	8.26
APLP2	CSF3R	880	238	398	595	714	0.606	14.29	18.27	14.14	7.67	14.20	10.07	15.53	13.80	12.35	8.07
BCKDK	CSF3R	852	156	353	774	175	0.567	12.01	18.27	10.53	7.67	11.86	10.07	10.42	13.80	11.67	8.07
CHST15	CSF3R	985	208	672	890	443	0.689	13.55	18.27	10.43	7.67	10.27	10.07	11.18	13.80	10.36	8.07
ARAP1	CSNK1D	1000	621	782	904	217	0.597	14.17	13.40	11.21	12.49	11.58	12.17	13.05	13.04	10.46	12.76
CES2	CSNK2B	769	837	933	955	664	0.052	10.56	12.33	11.23	11.64	14.07	11.85	10.51	11.87	11.53	12.02
AKR1A1	CSRP1	999	324	799	126	550	0.824	11.06	11.35	10.32	14.70	13.11	12.49	11.49	14.76	10.34	11.20
COMMD9	CSRP1	1000	208	710	130	517	0.886	10.97	11.35	10.29	14.70	9.99	12.49	9.44	14.76	10.47	11.20
COPS6	CSRP1	993	352	815	458	668	0.745	11.09	11.35	11.80	14.70	11.13	12.49	10.99	14.76	11.93	11.20
ARHGEF10L	CST3	919	151	300	851	819	0.503	9.47	13.35	11.06	16.25	13.76	13.81	10.93	13.91	12.34	13.32
CAP1	CTDSP1	998	351	662	822	961	0.523	15.51	13.45	12.28	10.35	12.26	12.99	13.94	12.79	11.20	11.68
ARHGEF11	CTNNA1	746	419	948	816	973	0.123	11.85	12.33	12.40	12.78	11.19	12.76	11.69	14.43	11.19	12.86
ASGR2	CTNNA1	720	197	966	257	530	0.315	10.73	12.33	4.48	12.78	14.72	12.76	5.41	14.43	3.20	12.86
AKR7A2	CTSC	745	333	785	796	596	0.197	10.04	12.74	9.82	6.93	10.90	10.18	9.45	12.96	10.54	9.13
ASGR2	CTSH	857	409	847	288	183	0.540	10.73	12.52	4.48	10.70	14.72	11.84	5.41	13.68	3.20	9.48
CEBPB	CTSS	537	692	134	446	423	0.056	13.99	14.85	9.38	6.04	13.22	10.35	12.98	12.64	12.77	7.92
CA2	CTTN	219	650	361	659	60	0.000	10.29	9.56	10.88	12.84	12.01	12.47	9.30	13.23	10.45	12.31
CLU	CTTN	836	384	580	745	361	0.509	12.76	9.56	18.59	12.84	16.43	12.47	14.68	13.23	10.77	12.31
CES2	CUEDC2	993	963	975	989	605	0.220	10.56	10.84	11.23	11.45	14.07	10.39	10.51	10.22	11.53	11.37
CHMP4A	CUL1	955	562	980	937	840	0.263	11.33	10.63	10.53	11.53	10.10	11.54	10.35	11.20	9.72	12.54
CMTR1	CUL1	980	996	882	944	946	0.084	11.22	10.63	11.42	11.53	11.22	11.54	11.45	11.20	11.37	12.54
CCDC109B	CUTA	855	555	613	869	831	0.283	10.24	11.48	5.46	11.87	6.05	11.88	8.12	11.21	6.87	11.16
CCNB1IP1	CUTA	996	840	832	823	725	0.382	9.46	11.48	9.93	11.87	10.64	11.88	10.36	11.21	10.92	11.16
CEBPB	CUX1	851	248	267	737	856	0.408	13.99	12.21	9.38	11.88	13.22	11.34	12.98	12.40	12.77	12.40
CORO1C	CUX1	962	663	899	940	961	0.193	12.04	12.21	11.17	11.88	11.44	11.34	13.02	12.40	11.37	12.40
ATAD1	CWF19L2	991	406	924	942	878	0.360	9.64	9.32	10.63	7.76	10.56	8.43	10.49	8.56	11.53	9.29
C21orf33	CYB561A3	988	942	884	968	150	0.329	11.06	10.92	11.96	8.67	13.57	10.60	11.08	10.33	12.80	10.53
COG2	CYB561A3	988	937	872	906	825	0.206	9.65	10.92	9.52	8.67	9.51	10.60	9.29	10.33	10.44	10.53
ACD	CYB561D2	917	665	635	703	902	0.382	10.31	10.48	10.16	7.21	8.50	9.72	8.98	8.52	8.83	8.23
C9orf114	CYB561D2	869	490	404	950	919	0.369	10.19	10.48	10.40	7.21	10.63	9.72	9.60	8.52	10.01	8.23
ASGR2	CYFIP1	869	678	967	476	594	0.417	10.73	10.70	4.48	11.11	14.72	11.36	5.41	12.58	3.20	11.04
BAIAP2-AS1	CYFIP1	826	498	836	883	879	0.163	9.19	10.70	11.71	11.11	9.16	11.36	9.67	12.58	6.66	11.04
C10orf11	CYFIP1	787	616	209	838	368	0.372	7.98	10.70	4.39	11.11	7.66	11.36	6.46	12.58	6.24	11.04
CLCN5	CYFIP1	988	716	137	930	807	0.499	8.63	10.70	7.53	11.11	11.16	11.36	9.39	12.58	9.81	11.04
COMMD9	CYFIP1	945	756	980	908	597	0.287	10.97	10.70	10.29	11.11	9.99	11.36	9.44	12.58	10.47	11.04
ADD3	CYFIP2	629	82	227	693	353	0.194	12.07	13.30	13.29	14.10	10.02	10.95	12.02	10.57	9.87	9.29
ABHD5	CYSTM1	798	827	929	845	775	0.011	12.21	13.01	6.91	10.56	8.93	10.17	9.32	11.46	9.30	12.44
B4GALT5	CYSTM1	922	457	736	846	610	0.498	12.86	13.01	10.64	10.56	11.05	10.17	11.83	11.46	12.62	12.44
BASP1	CYSTM1	982	255	887	789	121	0.626	14.45	13.01	14.01	10.56	8.06	10.17	10.34	11.46	6.68	12.44
BCL6	CYSTM1	910	711	746	706	169	0.488	15.42	13.01	11.51	10.56	12.59	10.17	13.82	11.46	14.96	12.44
CEACAM3	CYSTM1	586	404	598	545	101	0.106	12.31	13.01	1.33	10.56	4.69	10.17	6.04	11.46	2.77	12.44
BNIP3	DANCR	677	778	709	851	547	0.065	9.50	9.42	11.44	10.11	12.07	9.76	9.81	9.40	12.63	10.36
C11orf24	DAXX	977	862	807	929	699	0.305	9.69	11.80	9.16	10.42	12.07	10.60	10.17	10.83	9.27	11.02
BTF3L4	DBI	892	149	829	971	61	0.423	9.93	10.16	10.37	11.94	9.80	13.23	9.78	11.33	11.22	10.67
C16orf91	DBI	960	176	697	982	353	0.592	8.17	10.16	8.01	11.94	8.25	13.23	6.84	11.33	8.78	10.67
BLVRB	DCAF12	850	643	607	872	700	0.300	12.84	12.83	9.31	9.02	12.20	10.30	11.05	10.26	11.62	10.59
ADPRM	DCAF16	918	848	886	849	579	0.255	9.06	9.47	6.09	9.30	8.23	8.80	7.24	9.92	8.76	9.85
COPB2	DCAF7	951	990	999	974	1000	0.000	11.92	11.44	10.95	11.47	12.19	11.09	12.17	11.83	11.14	10.96
ABHD10	DCLRE1C	982	797	419	980	137	0.576	9.39	9.73	10.13	6.68	10.64	7.15	8.78	7.90	9.44	7.83
CUL5	DCLRE1C	984	837	845	990	494	0.385	9.14	9.73	9.76	6.68	10.43	7.15	9.93	7.90	12.05	7.83
C21orf33	DCP1B	933	953	459	983	116	0.433	11.06	8.90	11.96	7.35	13.57	8.68	11.08	8.21	12.80	9.08
CIAPIN1	DCP1B	946	927	348	902	794	0.331	10.19	8.90	10.37	7.35	10.27	8.68	9.97	8.21	10.77	9.08
ACTR5	DCTD	1000	786	859	963	984	0.204	9.25	10.49	7.84	10.90	8.59	11.61	8.15	10.97	8.92	10.60
CCNB1IP1	DCTD	995	862	168	716	672	0.615	9.46	10.49	9.93	10.90	10.64	11.61	10.36	10.97	10.92	10.60
CMTM3	DCTD	559	248	716	798	711	0.029	11.85	10.49	6.96	10.90	8.18	11.61	10.90	10.97	8.39	10.60
ARHGAP4	DCTN1	989	388	901	709	827	0.509	14.14	12.35	8.55	14.71	9.65	11.81	12.18	12.86	8.61	13.08
CSRP1	DCTN2	953	77	736	701	363	0.688	11.35	12.14	14.70	12.71	12.49	11.22	14.76	12.16	11.20	12.48
ADH5	DCTPP1	956	463	708	839	756	0.510	10.47	9.47	11.15	8.88	12.91	8.80	12.18	8.20	11.72	9.94
CEP95	DCUN1D5	836	598	369	476	626	0.560	9.71	8.64	9.53	8.32	10.14	8.70	10.20	8.49	10.14	10.01
BBS9	DDX10	989	786	510	532	721	0.704	8.74	8.85	8.52	9.39	8.21	8.93	8.58	8.89	8.48	9.48
BLCAP	DDX18	965	871	261	934	709	0.423	10.88	10.58	12.78	10.07	12.32	10.87	11.10	10.98	14.05	10.73
C12orf65	DDX18	992	951	594	906	905	0.306	8.73	10.58	8.98	10.07	9.31	10.87	8.57	10.98	9.26	10.73
CCNB1IP1	DDX20	621	946	221	661	808	0.060	9.46	9.47	9.93	8.12	10.64	8.77	10.36	8.92	10.92	9.92
ACSL5	DDX23	900	388	758	903	773	0.335	10.94	11.95	8.33	11.27	12.76	11.83	11.40	11.90	8.25	11.97
ACSS1	DDX23	839	128	734	813	357	0.405	11.00	11.95	12.16	11.27	9.81	11.83	11.33	11.90	11.58	11.97
AES	DDX39A	995	480	909	824	321	0.624	13.66	11.50	15.75	9.27	13.74	10.41	14.46	11.07	14.44	9.99
APEH	DDX39A	752	470	649	845	715	0.196	11.53	11.50	11.27	9.27	11.97	10.41	10.92	11.07	12.44	9.99
ATP5A1	DDX39A	827	482	668	915	26	0.406	12.98	11.50	14.59	9.27	14.03	10.41	13.65	11.07	15.13	9.99
C21orf33	DDX39A	820	768	734	877	33	0.229	11.06	11.50	11.96	9.27	13.57	10.41	11.08	11.07	12.80	9.99
CARD11	DDX39A	970	509	273	425	404	0.935	11.46	11.50	5.61	9.27	7.09	10.41	8.31	11.07	4.64	9.99
CSF1R	DDX41	873	314	751	888	655	0.356	12.11	11.78	9.05	11.69	8.78	11.06	11.19	10.92	8.26	10.68
CSRP1	DDX41	894	138	890	425	638	0.524	11.35	11.78	14.70	11.69	12.49	11.06	14.76	10.92	11.20	10.68
ARID2	DDX42	998	780	913	949	1000	0.176	10.18	11.58	8.66	12.13	9.41	11.89	10.15	12.57	10.06	12.52
ADD3	DDX46	965	434	934	768	558	0.550	12.07	11.13	13.29	10.41	10.02	11.04	12.02	11.24	9.87	11.86
COQ10A	DDX47	962	860	15	757	40	0.616	8.44	7.13	8.75	5.35	9.96	6.80	7.45	6.32	11.56	7.68
DCAF16	DDX47	972	912	857	907	661	0.276	9.47	7.13	9.30	5.35	8.80	6.80	9.92	6.32	9.85	7.68
ARHGAP4	DDX49	966	487	801	672	871	0.510	14.14	10.98	8.55	10.30	9.65	10.61	12.18	9.75	8.61	10.64
CYFIP2	DDX5	852	613	216	880	222	0.471	13.30	14.27	14.10	14.12	10.95	14.45	10.57	16.12	9.29	14.05
AP1G2	DDX56	998	923	838	935	868	0.214	11.36	11.45	10.84	11.12	9.27	11.79	9.95	11.39	7.34	11.28
APLP2	DENND1A	900	932	963	796	978	0.052	14.29	11.31	14.14	11.33	14.20	10.18	15.53	9.45	12.35	10.30
ARSD	DENND1A	729	227	768	491	743	0.229	10.03	11.31	7.62	11.33	11.49	10.18	9.70	9.45	7.24	10.30
CTNNA1	DENND1A	958	601	953	901	977	0.209	12.33	11.31	12.78	11.33	12.76	10.18	14.43	9.45	12.86	10.30
CTSH	DENND1A	884	239	866	248	400	0.585	12.52	11.31	10.70	11.33	11.84	10.18	13.68	9.45	9.48	10.30
CYFIP1	DENND1A	865	770	948	923	979	0.048	10.70	11.31	11.11	11.33	11.36	10.18	12.58	9.45	11.04	10.30
ACSL1	DENND3	988	641	246	667	839	0.652	16.81	14.35	10.48	11.74	15.79	9.20	14.09	13.24	15.03	10.45
ARHGEF11	DENND3	926	676	854	592	876	0.353	11.85	14.35	12.40	11.74	11.19	9.20	11.69	13.24	11.19	10.45
ATG2A	DENND3	444	642	846	914	825	0.000	12.61	14.35	10.98	11.74	12.00	9.20	11.25	13.24	11.24	10.45
BCKDK	DENND3	929	790	274	437	193	0.713	12.01	14.35	10.53	11.74	11.86	9.20	10.42	13.24	11.67	10.45
CHPF2	DENND3	877	713	841	242	772	0.341	11.52	14.35	9.71	11.74	10.40	9.20	10.72	13.24	9.41	10.45
ARAP3	DENND5A	910	583	906	648	723	0.390	12.08	13.06	9.57	12.69	8.91	10.39	11.99	12.32	9.57	11.13
CCNB1IP1	DENR	654	910	196	502	406	0.230	9.46	10.08	9.93	10.55	10.64	10.55	10.36	9.97	10.92	11.15
ADAP2	DERA	840	754	828	730	725	0.162	10.25	9.66	5.86	8.00	7.47	10.87	8.65	9.53	6.87	9.76
C1orf162	DERA	916	778	707	907	818	0.227	13.64	9.66	7.02	8.00	8.88	10.87	10.81	9.53	8.91	9.76
ANGPTL4	DES	499	169	204	179	149	0.000	6.89	9.74	9.56	7.62	12.55	8.60	9.98	13.06	9.43	18.27
AKTIP	DGKA	459	788	389	63	429	0.000	10.10	12.48	11.35	10.12	9.95	8.12	9.76	10.68	11.55	7.65
CAND1	DHRS4-AS1	971	692	311	807	860	0.512	10.66	8.44	11.94	8.64	11.56	10.59	11.81	7.95	10.79	8.48
DCK	DHRS4-AS1	895	719	313	991	951	0.285	10.02	8.44	8.83	8.64	7.47	10.59	8.57	7.95	8.79	8.48
DDX18	DHRS4-AS1	984	769	35	872	747	0.524	10.58	8.44	10.07	8.64	10.87	10.59	10.98	7.95	10.73	8.48
COLGALT1	DHRS7B	967	575	920	818	620	0.468	12.94	9.86	10.47	8.81	11.53	8.99	12.70	8.94	10.77	10.16
ARAP3	DHX34	869	427	862	755	549	0.405	12.08	13.36	9.57	9.75	8.91	10.42	11.99	10.15	9.57	9.82
C16orf58	DHX37	1000	980	719	918	307	0.442	10.36	9.92	11.02	9.03	11.83	9.58	10.83	9.34	9.43	10.78
CEPT1	DIDO1	971	986	956	859	970	0.064	10.18	11.68	8.48	11.29	10.10	11.59	9.81	12.13	9.06	11.73
C12orf65	DIEXF	990	982	541	904	894	0.320	8.73	9.01	8.98	8.79	9.31	9.61	8.57	8.34	9.26	9.23
AASDH	DIMT1	982	949	907	825	877	0.185	8.56	9.39	8.25	9.59	8.85	9.04	8.05	9.52	8.72	9.73
AKAP1	DIMT1	998	961	442	772	509	0.625	9.26	9.39	11.42	9.59	12.35	9.04	11.05	9.52	13.22	9.73
ACSL1	DIRC2	994	371	680	694	381	0.801	16.81	10.49	10.48	8.15	15.79	8.26	14.09	8.61	15.03	10.75
ARHGAP26	DIRC2	982	390	636	787	617	0.694	13.29	10.49	11.84	8.15	9.41	8.26	11.19	8.61	10.63	10.75
CEBPB	DIRC2	779	423	392	585	560	0.485	13.99	10.49	9.38	8.15	13.22	8.26	12.98	8.61	12.77	10.75
CKAP4	DIRC2	995	630	970	671	543	0.583	12.66	10.49	9.58	8.15	10.97	8.26	11.53	8.61	10.05	10.75
COL4A3BP	DIRC2	996	474	893	974	762	0.427	11.33	10.49	10.76	8.15	10.66	8.26	10.94	8.61	11.73	10.75
CRISPLD2	DIRC2	978	518	634	512	421	0.874	12.06	10.49	7.70	8.15	9.54	8.26	13.48	8.61	10.43	10.75
CCDC93	DIS3	938	977	884	941	936	0.028	11.30	9.84	10.74	9.82	10.35	10.44	11.22	10.53	11.06	10.43
CNOT6L	DLAT	774	774	607	89	285	0.357	11.67	8.98	9.64	10.09	10.28	9.91	10.98	9.56	10.53	12.09
ADA	DMAP1	729	422	787	270	882	0.229	10.05	11.15	6.77	11.40	7.50	11.25	8.07	10.82	8.35	10.59
AP1G2	DMAP1	985	834	982	983	970	0.086	11.36	11.15	10.84	11.40	9.27	11.25	9.95	10.82	7.34	10.59
ARHGAP4	DMAP1	996	607	870	924	908	0.338	14.14	11.15	8.55	11.40	9.65	11.25	12.18	10.82	8.61	10.59
DDX39A	DMAP1	916	861	831	728	786	0.229	11.50	11.15	9.27	11.40	10.41	11.25	11.07	10.82	9.99	10.59
ABCC3	DMTN	124	472	502	562	66	0.000	10.18	13.62	5.37	14.72	14.13	10.36	11.09	9.94	5.97	11.31
ABLIM3	DMTN	88	770	392	724	414	0.000	9.59	13.62	11.06	14.72	13.51	10.36	11.40	9.94	11.98	11.31
CTDSPL	DMTN	282	475	751	931	415	0.000	9.18	13.62	10.62	14.72	10.65	10.36	11.52	9.94	10.37	11.31
CTTN	DMTN	285	677	787	932	256	0.000	9.56	13.62	12.84	14.72	12.47	10.36	13.23	9.94	12.31	11.31
ARHGEF18	DNAJA3	899	984	928	984	919	0.000	12.04	9.88	11.03	10.89	10.60	12.24	11.09	10.27	9.41	12.35
C15orf39	DNAJB12	853	560	959	972	486	0.323	13.09	11.56	7.75	10.56	8.39	11.01	10.65	10.85	8.70	11.33
DEDD2	DNAJB12	859	919	695	785	971	0.119	13.00	11.56	10.25	10.56	9.94	11.01	9.95	10.85	9.57	11.33
C1orf21	DNAJC1	844	258	345	685	825	0.433	9.70	10.00	12.35	7.56	10.82	10.55	11.47	10.34	13.62	9.30
ANKS1A	DNAJC13	956	970	797	862	798	0.205	11.04	10.80	11.53	10.51	10.79	10.38	11.90	11.40	10.68	11.20
ABCB7	DNAJC2	991	818	950	878	848	0.235	9.66	9.07	7.83	8.82	9.72	9.59	9.15	9.29	10.74	10.55
ADD3	DNAJC21	970	460	814	645	424	0.711	12.07	9.60	13.29	9.90	10.02	10.49	12.02	10.50	9.87	12.06
BLCAP	DNAJC21	922	917	488	949	795	0.277	10.88	9.60	12.78	9.90	12.32	10.49	11.10	10.50	14.05	12.06
AHSA1	DNAJC24	512	730	905	722	753	0.000	11.40	7.05	12.01	7.23	11.28	7.79	11.14	7.06	12.06	9.16
APTX	DNAJC24	878	911	671	960	808	0.139	9.44	7.05	9.32	7.23	10.11	7.79	9.26	7.06	9.31	9.16
B4GALT5	DNAJC3	992	783	980	867	840	0.249	12.86	11.71	10.64	9.42	11.05	12.28	11.83	11.53	12.62	10.34
C12orf57	DNAJC30	774	845	812	604	513	0.215	9.49	8.01	9.98	8.89	9.90	9.05	9.87	6.91	9.69	8.67
ACSL1	DNAJC5	937	324	345	796	737	0.608	16.81	13.04	10.48	13.80	15.79	11.25	14.09	12.02	15.03	11.17
ASAH1	DNAJC5	966	671	991	890	399	0.418	13.59	13.04	11.48	13.80	11.36	11.25	13.46	12.02	11.86	11.17
CEBPB	DNAJC5	682	141	317	725	881	0.182	13.99	13.04	9.38	13.80	13.22	11.25	12.98	12.02	12.77	11.17
CPD	DNAJC5	868	711	980	861	962	0.082	13.16	13.04	10.70	13.80	12.03	11.25	12.42	12.02	10.88	11.17
BCKDHA	DNASE1L1	813	848	955	997	963	0.000	11.37	10.51	10.50	8.00	12.08	8.61	10.21	8.93	12.04	11.43
ACSL5	DNM1L	964	47	815	898	767	0.438	10.94	10.21	8.33	12.33	12.76	10.10	11.40	11.16	8.25	11.68
AP1G2	DNMT1	817	798	606	894	971	0.115	11.36	10.91	10.84	10.67	9.27	10.25	9.95	11.41	7.34	10.02
ALDH2	DNTTIP1	886	470	403	748	663	0.567	12.31	11.51	14.12	8.97	15.62	8.97	13.79	9.33	13.17	10.64
ARHGEF40	DNTTIP1	987	380	247	437	649	0.899	12.31	11.51	10.53	8.97	12.32	8.97	11.68	9.33	10.77	10.64
BCL6	DNTTIP1	953	545	821	490	422	0.723	15.42	11.51	11.51	8.97	12.59	8.97	13.82	9.33	14.96	10.64
CD300LB	DNTTIP1	308	306	712	365	255	0.000	10.91	11.51	1.37	8.97	3.67	8.97	5.55	9.33	2.62	10.64
CHST15	DNTTIP1	961	861	679	876	81	0.464	13.55	11.51	10.43	8.97	10.27	8.97	11.18	9.33	10.36	10.64
CPNE2	DNTTIP1	959	409	921	816	882	0.358	10.87	11.51	10.45	8.97	8.80	8.97	11.17	9.33	9.66	10.64
CPQ	DNTTIP1	984	452	802	388	722	0.706	12.17	11.51	8.78	8.97	10.38	8.97	10.49	9.33	8.81	10.64
CHMP2A	DOK1	981	477	879	927	774	0.422	12.87	11.46	11.32	6.78	11.57	6.80	11.39	8.98	11.82	6.56
DNTTIP1	DOK1	993	372	889	931	763	0.445	11.51	11.46	8.97	6.78	8.97	6.80	9.33	8.98	10.64	6.56
BCL2L1	DPCD	893	886	864	664	712	0.223	13.65	8.16	12.01	9.16	12.21	7.15	12.90	7.49	11.39	8.38
C12orf65	DPH5	856	904	753	943	983	0.051	8.73	8.50	8.98	7.02	9.31	8.34	8.57	7.33	9.26	9.11
CAMLG	DPH5	997	898	900	830	933	0.213	10.31	8.50	11.09	7.02	9.63	8.34	9.88	7.33	11.17	9.11
CCDC25	DPH5	957	874	985	983	920	0.060	9.14	8.50	10.96	7.02	10.65	8.34	9.49	7.33	11.02	9.11
CMPK1	DPH5	829	874	958	913	938	0.000	10.88	8.50	11.51	7.02	13.33	8.34	12.28	7.33	12.18	9.11
COPS6	DPP7	979	863	947	966	997	0.081	11.09	11.97	11.80	12.38	11.13	11.93	10.99	12.11	11.93	11.23
COMMD9	DPYSL2	955	908	795	743	516	0.429	10.97	10.47	10.29	15.09	9.99	10.17	9.44	13.73	10.47	10.69
ABCD4	DROSHA	996	625	756	804	961	0.419	10.09	9.91	10.04	10.95	10.87	10.01	10.31	10.34	9.69	10.79
CHD1L	DROSHA	997	773	692	871	952	0.350	10.46	9.91	10.28	10.95	11.33	10.01	10.64	10.34	10.31	10.79
DCPS	DTNBP1	923	825	391	817	848	0.351	9.76	10.42	6.99	10.14	10.93	8.18	7.92	8.95	8.99	9.65
CASZ1	DTX3	811	545	495	791	592	0.408	8.90	9.58	5.17	12.92	7.92	8.77	10.33	10.69	11.33	9.42
BEST1	DUSP1	834	301	413	480	822	0.507	12.24	15.56	9.62	11.84	7.77	14.50	10.03	15.87	7.30	13.08
ATP5G3	DUSP23	970	326	783	982	100	0.564	11.42	9.58	12.34	7.61	13.03	11.29	11.62	9.44	13.28	9.64
CCDC85B	DUSP23	752	480	519	621	672	0.348	10.52	9.58	12.32	7.61	9.33	11.29	10.51	9.44	10.20	9.64
CTSO	DYM	835	382	663	788	405	0.445	9.69	10.73	8.95	9.31	11.32	9.49	10.71	9.71	8.60	11.42
ADPGK	DYNC1LI2	994	705	858	838	968	0.303	12.19	10.47	9.39	12.55	10.85	11.09	11.53	12.05	9.40	11.65
ACYP1	DYRK4	650	946	682	711	835	0.000	7.01	9.03	8.42	8.31	6.82	8.36	7.49	8.52	8.69	8.67
ABHD5	DYSF	841	390	930	705	475	0.409	12.21	14.81	6.91	9.96	8.93	11.29	9.32	11.88	9.30	13.26
ADM	DYSF	653	314	780	186	220	0.230	12.97	14.81	7.41	9.96	10.45	11.29	12.16	11.88	10.85	13.26
AKIRIN2	DYSF	860	169	865	649	303	0.466	12.02	14.81	10.44	9.96	10.15	11.29	10.59	11.88	11.70	13.26
APLP2	DYSF	905	74	772	538	609	0.601	14.29	14.81	14.14	9.96	14.20	11.29	15.53	11.88	12.35	13.26
B4GALT5	DYSF	969	183	954	528	434	0.697	12.86	14.81	10.64	9.96	11.05	11.29	11.83	11.88	12.62	13.26
BCL6	DYSF	972	239	738	716	174	0.717	15.42	14.81	11.51	9.96	12.59	11.29	13.82	11.88	14.96	13.26
CEACAM3	DYSF	694	41	429	687	101	0.294	12.31	14.81	1.33	9.96	4.69	11.29	6.04	11.88	2.77	13.26
CKAP4	DYSF	993	103	947	836	566	0.561	12.66	14.81	9.58	9.96	10.97	11.29	11.53	11.88	10.05	13.26
CYSTM1	DYSF	994	185	945	725	607	0.600	13.01	14.81	10.56	9.96	10.17	11.29	11.46	11.88	12.44	13.26
AFG3L1P	DZIP3	972	662	591	771	707	0.579	9.68	8.54	9.63	11.43	10.10	8.44	9.80	8.85	9.89	9.96
C10orf2	DZIP3	824	877	79	299	25	0.486	8.15	8.54	7.25	11.43	8.68	8.44	6.85	8.85	9.81	9.96
CCDC109B	EBAG9	993	489	809	837	363	0.663	10.24	8.78	5.46	9.32	6.05	9.77	8.12	8.98	6.87	10.15
DBI	EBNA1BP2	917	95	502	955	43	0.625	10.16	9.31	11.94	10.74	13.23	12.13	11.33	9.82	10.67	10.49
ARMCX6	EBP	947	558	296	666	793	0.635	10.06	10.24	8.80	9.07	8.88	13.01	9.48	9.78	8.50	8.05
CYSTM1	ECE1	886	907	772	839	207	0.274	13.01	13.32	10.56	11.33	10.17	12.72	11.46	13.60	12.44	11.08
ABCF2	ECH1	989	666	271	810	29	0.740	10.66	11.95	11.35	11.47	10.03	13.88	10.65	11.96	12.40	13.95
ALYREF	ECH1	994	919	523	852	199	0.591	10.57	11.95	8.75	11.47	9.23	13.88	9.68	11.96	10.11	13.95
CARD11	ECHDC2	981	78	606	429	492	0.909	11.46	10.04	5.61	10.14	7.09	14.81	8.31	11.26	4.64	11.29
CDC25B	ECHDC2	998	588	60	507	246	0.949	11.88	10.04	11.52	10.14	11.00	14.81	13.12	11.26	9.78	11.29
CSRP1	ECHS1	877	545	533	242	665	0.632	11.35	10.75	14.70	12.15	12.49	14.92	14.76	10.96	11.20	12.67
BRCC3	ECI2	575	247	679	990	711	0.037	8.70	9.22	8.85	9.65	8.86	12.22	8.05	9.26	9.78	11.86
CCDC132	ECI2	734	140	576	990	482	0.313	9.03	9.22	10.28	9.65	9.11	12.22	9.04	9.26	10.08	11.86
CCT5	ECI2	599	278	239	792	84	0.148	11.67	9.22	10.75	9.65	10.87	12.22	11.38	9.26	12.09	11.86
CCT6A	ECI2	948	419	133	875	125	0.709	11.14	9.22	11.85	9.65	11.72	12.22	12.04	9.26	12.86	11.86
DHX33	ECI2	761	273	415	859	59	0.392	8.76	9.22	9.66	9.65	10.04	12.22	9.26	9.26	10.12	11.86
DKC1	ECI2	945	596	101	736	124	0.724	10.24	9.22	9.41	9.65	10.22	12.22	10.14	9.26	10.86	11.86
DUSP14	EEF1B2	763	515	837	673	744	0.178	7.35	11.53	9.14	12.04	9.12	12.86	7.70	13.01	8.73	13.65
ATP5A1	EEF1D	925	364	850	891	577	0.441	12.98	13.45	14.59	11.95	14.03	13.19	13.65	13.28	15.13	13.56
ATP5J	EEF1D	833	514	900	965	716	0.218	9.74	13.45	11.36	11.95	11.91	13.19	10.12	13.28	12.56	13.56
C21orf33	EEF1D	965	752	916	921	560	0.355	11.06	13.45	11.96	11.95	13.57	13.19	11.08	13.28	12.80	13.56
ABCE1	EEF1G	800	711	908	836	479	0.195	9.41	14.21	9.86	13.16	10.65	13.82	10.36	14.56	11.08	15.14
BLCAP	EEF1G	722	485	565	970	509	0.296	10.88	14.21	12.78	13.16	12.32	13.82	11.10	14.56	14.05	15.14
BZW2	EEF1G	966	450	968	823	788	0.394	9.81	14.21	9.33	13.16	9.12	13.82	9.84	14.56	12.65	15.14
CDKN2AIP	EEF1G	639	758	877	843	699	0.000	9.50	14.21	9.00	13.16	9.50	13.82	8.90	14.56	9.30	15.14
CMPK1	EEF1G	837	733	930	985	831	0.055	10.88	14.21	11.51	13.16	13.33	13.82	12.28	14.56	12.18	15.14
DIAPH1	EFCAB14	817	226	990	850	910	0.159	13.41	11.73	11.41	11.84	13.46	11.63	13.05	12.47	13.85	12.16
CHMP2A	EFHD2	965	774	780	828	881	0.298	12.87	14.65	11.32	12.49	11.57	10.79	11.39	12.04	11.82	8.61
CTDSP1	EFHD2	1000	72	912	631	762	0.598	13.45	14.65	10.35	12.49	12.99	10.79	12.79	12.04	11.68	8.61
CYSTM1	EFHD2	820	397	865	834	283	0.320	13.01	14.65	10.56	12.49	10.17	10.79	11.46	12.04	12.44	8.61
CD4	EFTUD2	908	118	75	582	342	0.775	12.14	11.68	8.27	11.11	11.68	10.97	12.30	11.36	7.15	12.19
CSF1R	EFTUD2	916	353	961	930	380	0.416	12.11	11.68	9.05	11.11	8.78	10.97	11.19	11.36	8.26	12.19
ALG8	EHBP1	917	873	783	865	995	0.115	9.39	8.41	8.47	11.16	10.09	11.25	8.79	9.69	8.71	9.81
CCDC109B	EI24	996	631	64	864	197	0.745	10.24	9.75	5.46	11.16	6.05	13.27	8.12	11.32	6.87	12.21
ADH5	EID2	997	542	869	990	894	0.346	10.47	8.28	11.15	9.58	12.91	8.49	12.18	7.87	11.72	8.85
CCNB1IP1	EID2	488	870	361	463	771	0.000	9.46	8.28	9.93	9.58	10.64	8.49	10.36	7.87	10.92	8.85
COQ5	EID2	970	736	971	976	446	0.352	9.54	8.28	9.05	9.58	10.77	8.49	8.70	7.87	10.93	8.85
ACSL5	EIF2B1	963	325	923	803	908	0.359	10.94	10.51	8.33	10.44	12.76	10.66	11.40	10.50	8.25	10.95
ARHGAP17	EIF2B1	979	813	972	561	989	0.295	10.30	10.51	8.56	10.44	9.51	10.66	10.59	10.50	10.67	10.95
AP1G2	EIF2B4	984	816	879	967	862	0.206	11.36	10.20	10.84	9.95	9.27	10.36	9.95	10.13	7.34	11.09
CCDC14	EIF2B4	706	696	415	854	825	0.108	9.00	10.20	10.49	9.95	11.01	10.36	11.60	10.13	10.20	11.09
AP1G2	EIF2B5	981	887	899	950	904	0.142	11.36	10.83	10.84	11.11	9.27	11.21	9.95	11.16	7.34	11.89
BBS2	EIF2B5	946	531	899	744	847	0.382	9.50	10.83	12.03	11.11	9.46	11.21	9.93	11.16	11.15	11.89
C11orf31	EIF2D	939	570	994	915	970	0.197	10.44	10.49	11.01	9.30	11.48	10.49	10.56	10.36	10.69	11.12
CCNC	EIF2D	793	742	751	862	931	0.046	9.19	10.49	9.80	9.30	11.46	10.49	10.03	10.36	9.67	11.12
DENR	EIF2D	843	663	933	959	957	0.090	10.08	10.49	10.55	9.30	10.55	10.49	9.97	10.36	11.15	11.12
AKAP7	EIF3E	960	762	515	904	371	0.580	8.02	12.01	9.16	11.31	10.03	12.18	7.63	12.88	9.26	13.17
C12orf45	EIF3E	934	650	951	799	991	0.209	7.38	12.01	6.16	11.31	7.77	12.18	6.39	12.88	7.36	13.17
EID2	EIF3G	622	776	985	929	914	0.000	8.28	12.54	9.58	11.20	8.49	11.74	7.87	12.10	8.85	13.32
ABHD14B	EIF3H	977	712	611	990	937	0.336	11.14	12.53	8.89	11.89	12.70	11.70	10.67	12.48	9.88	13.04
ABHD14B	EIF3K	986	523	706	982	912	0.410	11.14	12.46	8.89	11.78	12.70	11.76	10.67	11.98	9.88	13.28
ANAPC16	EIF3K	859	477	911	948	963	0.179	11.73	12.46	10.38	11.78	11.96	11.76	11.58	11.98	12.64	13.28
CMPK1	EIF4B	979	901	786	973	981	0.139	10.88	13.00	11.51	12.27	13.33	12.64	12.28	13.41	12.18	14.46
ARRB1	EIF4E2	894	857	575	960	482	0.375	11.24	11.13	11.27	10.81	8.65	11.31	11.25	10.40	8.61	12.07
ALDH2	EIF4EBP1	775	647	146	366	76	0.476	12.31	10.27	14.12	5.74	15.62	10.68	13.79	9.06	13.17	10.77
BLVRA	EIF4EBP1	960	259	495	913	661	0.633	10.54	10.27	9.62	5.74	6.99	10.68	10.47	9.06	10.30	10.77
CTSH	EIF4EBP1	929	516	482	763	432	0.719	12.52	10.27	10.70	5.74	11.84	10.68	13.68	9.06	9.48	10.77
ARHGEF3	EIF5B	872	251	633	628	596	0.566	10.98	10.79	10.85	12.06	7.58	12.21	10.63	12.28	9.47	13.41
ATPAF1	EIF5B	575	509	852	780	242	0.070	9.86	10.79	12.33	12.06	11.43	12.21	9.78	12.28	12.53	13.41
COG2	EIF5B	855	597	929	786	975	0.164	9.65	10.79	9.52	12.06	9.51	12.21	9.29	12.28	10.44	13.41
CTSC	EIF6	878	552	857	978	685	0.270	12.74	11.40	6.93	10.58	10.18	12.10	12.96	11.03	9.13	10.42
CARD11	ELAC2	934	639	101	106	446	0.798	11.46	10.72	5.61	11.03	7.09	11.65	8.31	10.78	4.64	12.00
DCP1B	ELAC2	967	959	397	950	957	0.251	8.90	10.72	7.35	11.03	8.68	11.65	8.21	10.78	9.08	12.00
DNAJC2	ELP2	997	980	644	914	943	0.254	9.07	10.12	8.82	11.00	9.59	11.56	9.29	10.83	10.55	11.66
CDK4	ELP3	980	499	999	994	973	0.243	9.61	10.04	8.57	10.54	9.68	10.29	10.22	9.37	9.93	10.96
CSK	ELP3	722	749	917	880	870	0.000	13.56	10.04	10.18	10.54	11.59	10.29	11.08	9.37	9.58	10.96
DCAF7	ELP3	955	923	1000	966	997	0.016	11.44	10.04	11.47	10.54	11.09	10.29	11.83	9.37	10.96	10.96
ECI2	ELP3	988	250	406	991	390	0.732	9.22	10.04	9.65	10.54	12.22	10.29	9.26	9.37	11.86	10.96
ARHGEF12	EMC3	437	841	967	299	761	0.000	10.51	12.01	12.92	10.63	13.16	10.85	13.32	10.46	12.74	12.37
ATP5D	EMP3	979	229	383	907	599	0.705	11.21	12.93	11.97	7.03	12.45	8.04	10.60	11.36	13.25	8.15
AURKAIP1	EMP3	695	336	711	904	649	0.120	11.71	12.93	11.45	7.03	12.09	8.04	10.52	11.36	12.16	8.15
ANKRD9	ENDOD1	372	155	154	52	103	0.000	9.54	9.80	9.53	11.39	8.69	8.75	8.50	10.75	11.85	11.57
CLDN5	ENDOD1	570	276	912	370	407	0.105	8.86	9.80	11.66	11.39	8.57	8.75	13.95	10.75	11.16	11.57
CLU	ENDOD1	575	487	601	581	635	0.037	12.76	9.80	18.59	11.39	16.43	8.75	14.68	10.75	10.77	11.57
CTTN	ENDOD1	866	940	917	862	59	0.185	9.56	9.80	12.84	11.39	12.47	8.75	13.23	10.75	12.31	11.57
DMTN	ENDOD1	361	422	511	884	777	0.000	13.62	9.80	14.72	11.39	10.36	8.75	9.94	10.75	11.31	11.57
CALHM2	ENDOG	840	585	220	649	290	0.563	10.76	7.31	8.09	7.00	7.57	8.46	10.13	5.53	8.90	9.78
ARHGEF11	ENTPD1	996	797	952	821	968	0.223	11.85	12.63	12.40	10.25	11.19	9.37	11.69	11.59	11.19	9.95
C19orf59	ENTPD1	969	264	522	249	234	0.927	13.16	12.63	2.26	10.25	4.81	9.37	10.23	11.59	3.80	9.95
CAMKK2	ENTPD1	996	593	837	939	774	0.420	13.08	12.63	14.10	10.25	11.70	9.37	11.53	11.59	10.02	9.95
CHMP2A	ENTPD1	824	824	801	642	683	0.173	12.87	12.63	11.32	10.25	11.57	9.37	11.39	11.59	11.82	9.95
CYSTM1	ENTPD1	906	578	870	594	512	0.535	13.01	12.63	10.56	10.25	10.17	9.37	11.46	11.59	12.44	9.95
DHRS7B	ENTPD1	984	795	707	500	522	0.706	9.86	12.63	8.81	10.25	8.99	9.37	8.94	11.59	10.16	9.95
DNTTIP1	ENTPD1	994	853	829	387	503	0.645	11.51	12.63	8.97	10.25	8.97	9.37	9.33	11.59	10.64	9.95
AKAP9	EP400	960	996	736	948	845	0.175	10.40	10.57	11.00	11.53	12.22	10.94	11.83	11.50	12.01	11.52
C12orf45	EPB41L4A-AS1	968	795	743	384	933	0.451	7.38	9.24	6.16	9.97	7.77	8.47	6.39	9.00	7.36	9.19
CCDC109B	EPB41L4A-AS1	874	645	628	417	872	0.425	10.24	9.24	5.46	9.97	6.05	8.47	8.12	9.00	6.87	9.19
ARHGEF37	EPN1	26	119	744	657	876	0.000	7.59	12.47	10.09	13.50	7.97	13.18	8.61	12.09	10.94	13.05
ATP6V0C	EPN1	790	986	886	987	1000	0.000	14.12	12.47	14.26	13.50	12.30	13.18	12.91	12.09	12.61	13.05
ADIPOR1	EPOR	560	643	462	618	493	0.060	14.70	10.11	11.39	8.12	12.05	10.10	12.45	9.61	12.12	8.08
DMTN	EPOR	316	148	715	772	285	0.000	13.62	10.11	14.72	8.12	10.36	10.10	9.94	9.61	11.31	8.08
CTSO	EPRS	942	615	458	405	678	0.738	9.69	10.96	8.95	11.53	11.32	11.10	10.71	11.57	8.60	12.56
CAMK2B	EPS8L1	215	31	31	62	514	0.000	5.38	7.62	14.04	3.27	9.15	6.45	3.76	8.99	12.91	5.37
ABHD14B	ERCC1	968	680	735	858	815	0.392	11.14	10.79	8.89	10.64	12.70	10.21	10.67	10.45	9.88	11.11
CMTM7	ERCC1	885	294	879	845	695	0.310	11.80	10.79	4.61	10.64	7.65	10.21	10.12	10.45	7.08	11.11
ABCD4	ERCC3	1000	742	948	953	953	0.202	10.09	10.68	10.04	11.28	10.87	10.61	10.31	10.83	9.69	11.13
DIEXF	ERCC6L2	882	997	881	845	950	0.019	9.01	8.78	8.79	8.45	9.61	8.71	8.34	8.79	9.23	9.33
EMC1	ERCC6L2	576	963	940	866	969	0.000	9.86	8.78	10.58	8.45	10.67	8.71	10.60	8.79	11.27	9.33
EEF1D	ERH	770	602	972	947	962	0.084	13.45	10.20	11.95	10.31	13.19	10.62	13.28	10.31	13.56	10.31
AGO4	ERLIN1	963	939	534	722	843	0.407	12.14	11.72	10.09	8.94	10.37	12.57	11.34	10.24	11.09	9.38
CIAPIN1	ERMARD	992	652	323	924	735	0.579	10.19	9.17	10.37	8.91	10.27	10.12	9.97	9.00	10.77	9.61
DHX33	ERMARD	987	702	750	839	707	0.475	8.76	9.17	9.66	8.91	10.04	10.12	9.26	9.00	10.12	9.61
DNM1L	ERMARD	978	762	172	834	817	0.499	10.21	9.17	12.33	8.91	10.10	10.12	11.16	9.00	11.68	9.61
EIF4A2	ERMARD	854	544	722	712	929	0.292	12.09	9.17	14.85	8.91	13.40	10.12	14.05	9.00	14.63	9.61
ANKRD9	ESAM	129	345	171	526	582	0.000	9.54	9.49	9.53	9.85	8.69	9.21	8.50	13.19	11.85	10.52
ARHGAP21	ESAM	528	98	797	849	737	0.014	9.38	9.49	14.24	9.85	11.04	9.21	12.38	13.19	11.93	10.52
DMTN	ESAM	183	89	383	830	590	0.000	13.62	9.49	14.72	9.85	10.36	9.21	9.94	13.19	11.31	10.52
EMC3	ESAM	570	262	836	613	276	0.070	12.01	9.49	10.63	9.85	10.85	9.21	10.46	13.19	12.37	10.52
ENDOD1	ESAM	798	413	981	621	675	0.299	9.80	9.49	11.39	9.85	8.75	9.21	10.75	13.19	11.57	10.52
BLMH	ESYT2	993	888	775	747	803	0.380	10.08	11.29	9.42	11.46	9.32	11.19	10.07	12.42	10.63	12.53
DCPS	ETFB	874	581	305	949	641	0.450	9.76	10.92	6.99	11.17	10.93	13.28	7.92	9.93	8.99	11.97
DDOST	ETFB	920	727	834	977	698	0.251	12.39	10.92	11.30	11.17	12.64	13.28	12.84	9.93	11.69	11.97
ALDH18A1	ETS1	996	654	388	382	886	0.722	9.40	12.49	9.84	9.08	10.83	10.77	9.86	13.32	8.65	10.72
CSF3R	ETS2	784	348	873	353	617	0.367	18.27	12.70	7.67	12.33	10.07	13.86	13.80	14.23	8.07	13.09
CUX1	ETS2	790	418	451	684	697	0.390	12.21	12.70	11.88	12.33	11.34	13.86	12.40	14.23	12.40	13.09
ACSL1	ETV6	893	632	267	390	24	0.720	16.81	12.27	10.48	8.78	15.79	10.00	14.09	11.12	15.03	9.53
C9orf72	ETV6	727	461	600	813	492	0.290	11.94	12.27	9.98	8.78	9.54	10.00	11.09	11.12	10.28	9.53
ANGPTL4	EVC	445	608	146	10	95	0.000	6.89	6.35	9.56	7.03	12.55	8.47	9.98	9.76	9.43	7.94
APOE	EVC	345	719	413	270	932	0.000	8.26	6.35	14.36	7.03	16.57	8.47	12.62	9.76	8.73	7.94
ARHGEF37	EVC	142	188	403	926	399	0.000	7.59	6.35	10.09	7.03	7.97	8.47	8.61	9.76	10.94	7.94
APAF1	EVI5	998	986	630	941	961	0.237	11.23	8.88	9.29	9.11	8.35	10.32	9.42	9.77	8.95	9.00
ARHGAP26	EVI5	914	917	489	682	632	0.464	13.29	8.88	11.84	9.11	9.41	10.32	11.19	9.77	10.63	9.00
ATG7	EVI5	926	893	408	882	909	0.260	11.17	8.88	9.64	9.11	8.51	10.32	9.40	9.77	9.34	9.00
CUX1	EVI5	908	727	640	981	973	0.225	12.21	8.88	11.88	9.11	11.34	10.32	12.40	9.77	12.40	9.00
ADSL	EVL	500	978	416	292	742	0.000	10.59	12.73	9.07	13.78	10.19	12.91	9.86	12.35	12.92	10.51
ATIC	EVL	996	784	518	248	239	0.841	10.39	12.73	10.72	13.78	10.81	12.91	10.26	12.35	11.27	10.51
COG2	EVL	722	734	596	394	170	0.285	9.65	12.73	9.52	13.78	9.51	12.91	9.29	12.35	10.44	10.51
CUTA	EVL	991	984	420	699	801	0.490	11.48	12.73	11.87	13.78	11.88	12.91	11.21	12.35	11.16	10.51
DDX5	EVL	539	665	834	806	415	0.019	14.27	12.73	14.12	13.78	14.45	12.91	16.12	12.35	14.05	10.51
EIF2D	EVL	963	643	621	710	743	0.568	10.49	12.73	9.30	13.78	10.49	12.91	10.36	12.35	11.12	10.51
ANGPTL4	EXOC3L2	228	167	419	184	95	0.000	6.89	5.07	9.56	1.63	12.55	7.06	9.98	6.38	9.43	5.34
C10orf10	EXOC3L2	289	163	309	6	419	0.000	9.58	5.07	10.57	1.63	12.35	7.06	14.61	6.38	12.39	5.34
CDK19	EXOC6	946	598	595	928	362	0.582	10.50	10.72	10.88	9.02	9.21	9.27	9.32	9.43	9.20	10.49
AHSA1	EXOSC10	877	667	878	798	875	0.145	11.40	10.95	12.01	11.37	11.28	10.51	11.14	11.30	12.06	11.21
CARD11	EXOSC10	973	529	379	542	482	0.910	11.46	10.95	5.61	11.37	7.09	10.51	8.31	11.30	4.64	11.21
DNAJA3	EXOSC10	992	910	938	941	895	0.142	9.88	10.95	10.89	11.37	12.24	10.51	10.27	11.30	12.35	11.21
ARV1	EXOSC2	817	964	965	974	909	0.000	8.14	9.58	9.18	9.33	9.12	9.84	8.04	9.16	9.13	9.77
ATRAID	EXOSC2	956	768	944	941	912	0.130	11.19	9.58	9.65	9.33	10.62	9.84	11.19	9.16	11.47	9.77
C2orf42	EXOSC2	912	974	748	950	727	0.174	9.24	9.58	8.40	9.33	9.24	9.84	7.27	9.16	8.42	9.77
CEPT1	EXOSC2	828	934	907	959	959	0.000	10.18	9.58	8.48	9.33	10.10	9.84	9.81	9.16	9.06	9.77
COQ9	EXOSC2	954	916	896	991	620	0.215	9.74	9.58	10.72	9.33	11.79	9.84	9.62	9.16	12.54	9.77
DCTD	EXOSC2	998	901	975	992	937	0.093	10.49	9.58	10.90	9.33	11.61	9.84	10.97	9.16	10.60	9.77
ACADM	EXOSC3	962	724	541	984	24	0.560	9.33	9.40	10.77	7.47	12.80	8.51	9.71	7.86	12.99	8.51
BFAR	EXOSC3	862	997	996	907	972	0.000	10.75	9.40	9.40	7.47	10.13	8.51	10.93	7.86	11.11	8.51
CREBL2	EXOSC3	755	893	981	868	954	0.000	10.34	9.40	11.30	7.47	11.21	8.51	10.87	7.86	9.68	8.51
ELMOD2	EXOSC3	974	883	940	977	977	0.062	9.28	9.40	8.27	7.47	9.89	8.51	8.96	7.86	8.95	8.51
ALDH2	EXT1	878	194	63	460	618	0.697	12.31	10.59	14.12	8.85	15.62	11.74	13.79	11.39	13.17	8.74
ATP6V1B2	F11R	928	103	940	788	738	0.379	13.91	12.28	13.89	8.53	11.51	12.90	12.98	13.40	12.08	9.37
ADAP2	FADS1	792	569	240	821	275	0.404	10.25	9.80	5.86	11.88	7.47	11.42	8.65	11.21	6.87	9.78
BLVRA	FADS1	866	485	301	962	324	0.549	10.54	9.80	9.62	11.88	6.99	11.42	10.47	11.21	10.30	9.78
ABLIM1	FAM102A	999	140	192	818	413	0.839	11.00	11.21	13.27	12.67	12.16	11.19	13.05	10.81	13.22	8.69
APBA2	FAM102A	933	705	672	795	435	0.530	10.46	11.21	13.30	12.67	6.20	11.19	7.87	10.81	4.12	8.69
C12orf57	FAM102A	903	711	627	876	615	0.392	9.49	11.21	9.98	12.67	9.90	11.19	9.87	10.81	9.69	8.69
C12orf65	FAM102A	960	697	631	931	883	0.349	8.73	11.21	8.98	12.67	9.31	11.19	8.57	10.81	9.26	8.69
CHMP7	FAM102A	919	764	530	911	858	0.306	11.15	11.21	10.57	12.67	10.41	11.19	10.32	10.81	11.08	8.69
BABAM1	FAM117A	913	660	638	968	788	0.327	11.65	11.82	11.68	7.18	10.88	9.13	10.58	8.76	11.69	7.96
CDK19	FAM120A	1000	813	532	842	884	0.465	10.50	12.15	10.88	11.20	9.21	12.49	9.32	12.50	9.20	12.77
COL1A1	FAM124A	515	102	756	317	677	0.015	8.40	5.04	6.87	9.40	11.90	5.96	14.71	6.81	10.66	6.80
DES	FAM124A	382	196	518	380	289	0.000	9.74	5.04	7.62	9.40	8.60	5.96	13.06	6.81	18.27	6.80
CTSB	FAM129B	864	334	822	766	858	0.255	14.59	11.31	14.05	10.57	14.91	10.47	15.69	14.10	13.53	10.21
ABLIM1	FAM134B	786	198	714	836	270	0.322	11.00	8.58	13.27	10.14	12.16	10.10	13.05	8.97	13.22	13.00
BACH2	FAM134B	832	872	89	343	428	0.498	8.99	8.58	7.43	10.14	8.66	10.10	8.37	8.97	9.36	13.00
C6orf48	FAM134B	581	563	129	682	587	0.050	11.18	8.58	11.00	10.14	10.46	10.10	11.84	8.97	10.56	13.00
CHMP7	FAM134B	910	947	94	541	631	0.529	11.15	8.58	10.57	10.14	10.41	10.10	10.32	8.97	11.08	13.00
DPH5	FAM134B	921	811	19	601	735	0.518	8.50	8.58	7.02	10.14	8.34	10.10	7.33	8.97	9.11	13.00
DKC1	FAM134C	874	902	406	603	895	0.323	10.24	11.77	9.41	10.75	10.22	11.60	10.14	10.86	10.86	10.94
ECI2	FAM134C	735	381	769	985	325	0.235	9.22	11.77	9.65	10.75	12.22	11.60	9.26	10.86	11.86	10.94
ACTR8	FAM210A	638	960	741	973	629	0.004	9.63	8.95	8.79	7.99	8.80	9.86	8.73	7.82	9.29	10.19
BLCAP	FAM210A	124	925	445	842	181	0.000	10.88	8.95	12.78	7.99	12.32	9.86	11.10	7.82	14.05	10.19
CCNG1	FAM210A	764	799	334	604	427	0.344	10.75	8.95	9.88	7.99	11.65	9.86	11.03	7.82	12.46	10.19
EIF3E	FAM210A	754	831	833	772	461	0.127	12.01	8.95	11.31	7.99	12.18	9.86	12.88	7.82	13.17	10.19
EPC2	FAM210A	163	976	891	930	585	0.000	10.00	8.95	9.61	7.99	9.23	9.86	9.69	7.82	10.33	10.19
BCL2L1	FAM210B	997	712	198	734	207	0.771	13.65	12.79	12.01	10.77	12.21	11.95	12.90	10.67	11.39	12.00
B4GALT5	FAM214B	982	896	525	647	601	0.629	12.86	12.64	10.64	10.63	11.05	9.48	11.83	10.80	12.62	9.94
CWF19L2	FAM3C	956	184	706	815	967	0.423	9.32	8.81	7.76	11.65	8.43	11.01	8.56	10.81	9.29	9.88
CALCOCO2	FAM49A	835	189	892	821	804	0.190	12.24	12.02	10.94	12.15	12.12	7.72	12.92	10.32	12.94	9.68
CLMN	FAM49A	995	104	333	694	656	0.815	10.84	12.02	10.48	12.15	11.83	7.72	10.61	10.32	10.19	9.68
ACOX1	FAM49B	995	396	305	949	879	0.576	12.20	13.43	10.77	11.32	13.29	9.50	10.86	10.84	11.83	10.69
ATP5B	FAM50A	859	774	794	913	169	0.255	13.74	11.34	14.91	11.14	14.35	11.02	14.31	11.53	15.46	11.61
ABLIM3	FAM63A	846	324	100	779	774	0.415	9.59	11.72	11.06	9.16	13.51	10.01	11.40	9.49	11.98	10.03
ACTN1	FAM63A	933	51	136	47	516	0.858	14.08	11.72	12.23	9.16	12.55	10.01	13.65	9.49	10.75	10.03
CCDC88B	FAM65A	945	563	901	639	914	0.382	13.95	11.51	9.51	12.35	9.19	10.62	11.27	12.71	7.57	11.34
C12orf65	FAM69A	982	982	735	809	713	0.344	8.73	8.25	8.98	10.02	9.31	9.17	8.57	7.11	9.26	8.28
COL1A1	FAM71A	0	0	0	0	0	0.000	8.40	0.00	6.87	0.00	11.90	0.00	14.71	0.00	10.66	0.00
COL6A1	FAM71A	0	0	0	0	0	0.000	8.83	0.00	12.83	0.00	13.28	0.00	15.30	0.00	12.76	0.00
AHSA1	FAM78A	639	861	814	582	337	0.098	11.40	11.43	12.01	9.03	11.28	7.00	11.14	9.04	12.06	10.25
ATP5B	FAM78A	960	868	697	637	723	0.458	13.74	11.43	14.91	9.03	14.35	7.00	14.31	9.04	15.46	10.25
C9orf114	FAM78A	887	515	668	919	225	0.489	10.19	11.43	10.40	9.03	10.63	7.00	9.60	9.04	10.01	10.25
C10orf10	FAM83A	125	202	561	66	0	0.000	9.58	6.38	10.57	1.13	12.35	4.15	14.61	2.79	12.39	2.26
C12orf57	FAM84B	766	169	290	571	452	0.496	9.49	7.60	9.98	8.15	9.90	10.17	9.87	10.20	9.69	7.96
C12orf65	FAM98B	991	983	813	942	932	0.147	8.73	9.07	8.98	10.13	9.31	8.75	8.57	9.08	9.26	9.99
DHRS4-AS1	FAM98B	978	726	227	947	968	0.386	8.44	9.07	8.64	10.13	10.59	8.75	7.95	9.08	8.48	9.99
BZW2	FARS2	971	967	959	770	501	0.344	9.81	8.85	9.33	7.37	9.12	8.30	9.84	7.85	12.65	9.16
AKAP11	FASTKD1	964	858	864	879	554	0.350	9.71	8.34	12.22	9.17	10.48	9.59	11.26	8.48	10.48	9.45
AKAP9	FASTKD1	853	956	279	635	432	0.462	10.40	8.34	11.00	9.17	12.22	9.59	11.83	8.48	12.01	9.45
ERMARD	FASTKD1	945	776	739	947	550	0.385	9.17	8.34	8.91	9.17	10.12	9.59	9.00	8.48	9.61	9.45
ASB1	FASTKD2	945	852	824	857	928	0.160	10.59	9.17	11.20	8.47	10.02	10.04	10.28	9.30	11.55	11.07
C2orf42	FASTKD2	963	946	329	928	884	0.297	9.24	9.17	8.40	8.47	9.24	10.04	7.27	9.30	8.42	11.07
ERMARD	FASTKD2	995	768	255	927	803	0.491	9.17	9.17	8.91	8.47	10.12	10.04	9.00	9.30	9.61	11.07
ABCC3	FAXDC2	403	254	104	197	448	0.000	10.18	11.01	5.37	10.92	14.13	12.04	11.09	11.36	5.97	9.41
ANKRD9	FAXDC2	583	99	67	163	172	0.166	9.54	11.01	9.53	10.92	8.69	12.04	8.50	11.36	11.85	9.41
EIF2AK1	FAXDC2	935	418	214	566	484	0.837	12.85	11.01	11.94	10.92	12.37	12.04	11.69	11.36	11.69	9.41
EMC3	FAXDC2	674	241	71	441	252	0.348	12.01	11.01	10.63	10.92	10.85	12.04	10.46	11.36	12.37	9.41
ABHD14A	FBL	992	729	779	820	92	0.570	8.84	11.57	10.56	9.99	8.95	10.79	7.80	11.15	9.20	11.32
ABHD14B	FBL	1000	784	525	877	892	0.461	11.14	11.57	8.89	9.99	12.70	10.79	10.67	11.15	9.88	11.32
ATP5L	FBL	715	819	994	992	580	0.068	11.23	11.57	11.58	9.99	11.61	10.79	11.14	11.15	12.13	11.32
ATP6V0E2	FBL	949	624	73	810	124	0.681	9.72	11.57	13.70	9.99	11.53	10.79	8.21	11.15	8.87	11.32
C12orf65	FBL	890	748	813	887	944	0.111	8.73	11.57	8.98	9.99	9.31	10.79	8.57	11.15	9.26	11.32
DHRS3	FBL	962	436	909	655	897	0.444	10.29	11.57	9.60	9.99	13.74	10.79	11.45	11.15	11.36	11.32
EBAG9	FBL	800	723	937	895	782	0.048	8.78	11.57	9.32	9.99	9.77	10.79	8.98	11.15	10.15	11.32
CRISPLD2	FBXL5	980	330	310	461	436	0.960	12.06	13.74	7.70	11.62	9.54	11.58	13.48	11.99	10.43	12.40
ARL2BP	FBXO21	995	978	575	744	781	0.451	10.08	9.27	10.36	11.45	9.69	10.83	10.37	10.71	10.05	11.23
ETS1	FBXO21	960	585	463	760	576	0.710	12.49	9.27	9.08	11.45	10.77	10.83	13.32	10.71	10.72	11.23
DHX8	FBXO42	939	987	879	936	990	0.032	11.56	10.98	9.98	10.21	10.15	9.96	10.62	10.19	10.77	11.04
C12orf65	FBXO8	752	616	757	979	982	0.068	8.73	8.86	8.98	8.29	9.31	10.13	8.57	8.86	9.26	8.77
ARHGAP4	FBXW5	995	561	674	895	827	0.511	14.14	12.85	8.55	12.63	9.65	13.49	12.18	12.10	8.61	13.52
ABHD5	FCGRT	838	757	289	653	145	0.471	12.21	13.82	6.91	9.79	8.93	13.71	9.32	13.32	9.30	11.02
ALDOA	FCGRT	670	70	74	816	290	0.255	16.43	13.82	16.81	9.79	13.08	13.71	14.97	13.32	17.22	11.02
ARAP3	FCGRT	977	558	221	543	955	0.676	12.08	13.82	9.57	9.79	8.91	13.71	11.99	13.32	9.57	11.02
ARHGEF11	FCGRT	984	4	473	950	718	0.634	11.85	13.82	12.40	9.79	11.19	13.71	11.69	13.32	11.19	11.02
ATP6V0B	FCGRT	1000	14	140	909	663	0.714	13.65	13.82	12.20	9.79	12.06	13.71	12.02	13.32	11.51	11.02
CHST15	FCGRT	928	41	272	601	58	0.805	13.55	13.82	10.43	9.79	10.27	13.71	11.18	13.32	10.36	11.02
CKAP4	FCGRT	921	101	61	430	877	0.653	12.66	13.82	9.58	9.79	10.97	13.71	11.53	13.32	10.05	11.02
DEF8	FCGRT	997	25	414	963	946	0.539	12.71	13.82	12.54	9.79	10.98	13.71	11.45	13.32	10.66	11.02
DNTTIP1	FCGRT	993	312	427	866	911	0.598	11.51	13.82	8.97	9.79	8.97	13.71	9.33	13.32	10.64	11.02
BCL2L1	FECH	990	889	491	745	89	0.663	13.65	10.79	12.01	9.59	12.21	10.73	12.90	8.88	11.39	11.03
ADAM9	FGD4	967	671	18	804	618	0.637	11.05	11.46	10.09	9.14	9.58	10.75	12.86	10.76	11.22	10.84
APAF1	FGD4	949	442	443	895	666	0.618	11.23	11.46	9.29	9.14	8.35	10.75	9.42	10.76	8.95	10.84
ARHGAP26	FGD4	968	224	335	811	415	0.780	13.29	11.46	11.84	9.14	9.41	10.75	11.19	10.76	10.63	10.84
ASAP1	FGD4	932	463	58	909	691	0.564	12.51	11.46	11.04	9.14	9.80	10.75	12.25	10.76	10.57	10.84
ATP6V1C1	FGD4	756	197	180	824	822	0.256	11.80	11.46	12.62	9.14	10.85	10.75	11.04	10.76	10.35	10.84
C9orf72	FGD4	964	346	627	807	776	0.573	11.94	11.46	9.98	9.14	9.54	10.75	11.09	10.76	10.28	10.84
FAM49A	FGD4	854	237	134	868	676	0.443	12.02	11.46	12.15	9.14	7.72	10.75	10.32	10.76	9.68	10.84
C20orf196	FGFR1OP2	525	847	854	616	896	0.000	8.77	10.99	6.29	11.01	5.80	10.09	5.59	10.63	8.10	10.39
CSF1R	FIG4	221	299	835	926	428	0.000	12.11	10.65	9.05	10.34	8.78	8.52	11.19	9.46	8.26	9.66
DDX23	FIG4	931	890	880	902	896	0.078	11.95	10.65	11.27	10.34	11.83	8.52	11.90	9.46	11.97	9.66
DENND1A	FIG4	770	988	954	730	966	0.020	11.31	10.65	11.33	10.34	10.18	8.52	9.45	9.46	10.30	9.66
APLP2	FKBP15	989	776	873	733	970	0.302	14.29	12.58	14.14	10.52	14.20	10.83	15.53	11.80	12.35	10.90
CREBZF	FKBP3	803	857	742	683	265	0.242	10.37	9.26	11.40	11.15	11.92	10.16	12.46	9.10	11.50	12.37
ERMARD	FKBP3	970	766	598	938	526	0.526	9.17	9.26	8.91	11.15	10.12	10.16	9.00	9.10	9.61	12.37
C16orf62	FKBP4	579	602	787	359	768	0.040	10.71	11.27	11.08	12.23	9.88	12.11	10.48	11.06	10.74	12.21
CSF3R	FLII	846	494	873	732	531	0.388	18.27	13.51	7.67	11.75	10.07	12.14	13.80	13.30	8.07	14.49
EFTUD2	FLNA	800	333	659	700	168	0.420	11.68	15.40	11.11	12.88	10.97	12.88	11.36	17.12	12.19	13.12
BCL6	FLOT1	905	478	979	836	402	0.440	15.42	14.37	11.51	13.28	12.59	12.62	13.82	13.20	14.96	12.77
CEACAM3	FLOT1	772	87	499	699	249	0.445	12.31	14.37	1.33	13.28	4.69	12.62	6.04	13.20	2.77	12.77
ABHD2	FNDC3B	866	902	546	840	927	0.173	12.85	11.71	11.72	7.58	13.66	11.99	12.41	12.19	11.64	11.58
CUX1	FNDC3B	830	540	798	918	934	0.161	12.21	11.71	11.88	7.58	11.34	11.99	12.40	12.19	12.40	11.58
CECR1	FNIP2	784	191	81	736	217	0.450	12.68	9.23	8.62	10.16	8.51	11.56	11.37	11.01	8.12	10.43
EHBP1	FNTA	894	688	593	984	996	0.254	8.41	10.84	11.16	10.78	11.25	10.94	9.69	11.12	9.81	11.61
ATP6V0C	FOXO4	502	52	764	548	884	0.001	14.12	11.98	14.26	11.09	12.30	9.12	12.91	9.52	12.61	12.03
ARVCF	FOXP2	0	137	617	629	575	0.000	8.42	2.74	10.55	6.69	10.60	8.17	9.57	6.78	9.93	8.87
CEND1	FOXP2	0	568	124	230	107	0.000	4.79	2.74	13.85	6.69	3.53	8.17	2.48	6.78	3.58	8.87
ACOX1	FPR1	998	570	34	749	585	0.794	12.20	16.67	10.77	5.00	13.29	7.63	10.86	10.81	11.83	6.27
AGPAT2	FPR1	982	303	379	622	624	0.841	11.77	16.67	8.54	5.00	13.80	7.63	11.21	10.81	10.14	6.27
ARAP1	FPR1	916	329	720	562	93	0.691	14.17	16.67	11.21	5.00	11.58	7.63	13.05	10.81	10.46	6.27
ATP6V1A	FPR1	926	80	806	790	280	0.554	11.71	16.67	12.61	5.00	11.30	7.63	11.06	10.81	9.74	6.27
BRI3	FPR1	965	350	172	732	689	0.720	12.91	16.67	10.15	5.00	11.99	7.63	12.37	10.81	12.16	6.27
CHMP2A	FPR1	985	315	827	767	353	0.673	12.87	16.67	11.32	5.00	11.57	7.63	11.39	10.81	11.82	6.27
CYSTM1	FPR1	971	604	797	485	167	0.742	13.01	16.67	10.56	5.00	10.17	7.63	11.46	10.81	12.44	6.27
ALKBH3	FRA10AC1	943	682	873	860	949	0.207	8.98	8.78	8.26	10.63	8.81	9.85	8.25	9.67	9.93	10.17
ACOX1	FRAT2	1000	394	744	823	601	0.666	12.20	13.13	10.77	7.67	13.29	9.65	10.86	8.75	11.83	8.57
ARPC5	FRAT2	987	784	579	917	603	0.532	13.95	13.13	10.76	7.67	11.65	9.65	12.93	8.75	9.54	8.57
CHST15	FRAT2	911	800	395	895	471	0.474	13.55	13.13	10.43	7.67	10.27	9.65	11.18	8.75	10.36	8.57
CMTM6	FRAT2	984	332	655	805	577	0.700	12.87	13.13	8.19	7.67	12.51	9.65	11.43	8.75	8.55	8.57
CYSTM1	FRAT2	944	262	634	710	328	0.716	13.01	13.13	10.56	7.67	10.17	9.65	11.46	8.75	12.44	8.57
APAF1	FRY	839	990	859	858	190	0.170	11.23	10.73	9.29	11.06	8.35	10.32	9.42	11.15	8.95	10.83
FAF2	FRYL	992	600	961	864	1000	0.276	10.49	10.68	10.53	11.16	11.09	10.11	10.67	11.37	10.35	10.60
ABLIM3	FSTL1	617	51	475	856	271	0.175	9.59	8.75	11.06	10.39	13.51	11.17	11.40	14.56	11.98	11.59
C9orf72	FTH1	258	53	407	705	439	0.000	11.94	16.31	9.98	14.61	9.54	13.61	11.09	15.37	10.28	13.66
C9orf114	FTSJ1	996	789	475	946	950	0.400	10.19	10.23	10.40	9.43	10.63	9.46	9.60	9.93	10.01	9.87
ECH1	FTSJ1	970	708	181	846	92	0.663	11.95	10.23	11.47	9.43	13.88	9.46	11.96	9.93	13.95	9.87
AKR1A1	FTSJ3	955	736	586	977	804	0.369	11.06	10.82	10.32	9.98	13.11	10.80	11.49	10.58	10.34	11.17
ATP5A1	FTSJ3	983	636	973	980	87	0.421	12.98	10.82	14.59	9.98	14.03	10.80	13.65	10.58	15.13	11.17
CUL1	FTSJ3	993	722	992	955	990	0.157	10.63	10.82	11.53	9.98	11.54	10.80	11.20	10.58	12.54	11.17
FAM78A	FTSJ3	920	394	875	862	23	0.471	11.43	10.82	9.03	9.98	7.00	10.80	9.04	10.58	10.25	11.17
BMS1	FUBP1	999	984	970	531	693	0.409	10.14	10.89	10.39	11.07	10.60	10.77	10.80	12.14	11.65	11.67
AGPAT3	FUCA2	931	820	783	991	337	0.345	11.40	9.99	12.76	8.10	12.71	10.52	11.53	10.18	12.78	8.32
AOAH	FUCA2	875	631	615	368	746	0.504	12.91	9.99	4.85	8.10	7.34	10.52	8.81	10.18	4.97	8.32
AP1S2	FUCA2	895	677	961	968	677	0.218	10.84	9.99	10.40	8.10	8.09	10.52	9.86	10.18	11.74	8.32
ARRB1	FUCA2	966	490	603	859	775	0.564	11.24	9.99	11.27	8.10	8.65	10.52	11.25	10.18	8.61	8.32
ATIC	FUK	972	674	892	829	829	0.332	10.39	10.06	10.72	9.49	10.81	10.18	10.26	9.51	11.27	9.57
DPH2	FUK	995	747	834	755	697	0.473	9.68	10.06	9.57	9.49	9.74	10.18	9.04	9.51	10.95	9.57
ANGPTL4	FUT5	0	0	340	0	0	0.000	6.89	1.45	9.56	1.05	12.55	3.51	9.98	0.64	9.43	0.51
COL6A1	FUT5	0	0	97	0	0	0.000	8.83	1.45	12.83	1.05	13.28	3.51	15.30	0.64	12.76	0.51
ADRM1	FXYD5	902	259	773	935	420	0.467	11.45	13.57	10.60	7.37	11.50	8.87	10.89	11.78	12.82	9.03
BCAP31	FXYD5	613	439	908	984	896	0.057	13.21	13.57	12.65	7.37	12.60	8.87	12.77	11.78	11.42	9.03
C16orf13	FXYD5	990	233	452	911	888	0.581	10.28	13.57	11.15	7.37	10.34	8.87	9.75	11.78	10.40	9.03
C19orf70	FXYD5	916	217	754	927	808	0.343	9.70	13.57	10.56	7.37	10.35	8.87	9.50	11.78	11.25	9.03
CES2	FXYD5	577	17	595	878	517	0.069	10.56	13.57	11.23	7.37	14.07	8.87	10.51	11.78	11.53	9.03
DUS1L	FXYD5	975	224	262	866	715	0.659	11.60	13.57	11.18	7.37	12.67	8.87	11.67	11.78	12.05	9.03
EDF1	FXYD5	1000	201	874	981	939	0.353	12.20	13.57	12.47	7.37	13.20	8.87	12.29	11.78	12.43	9.03
ARHGEF10L	FXYD6	727	598	67	706	598	0.253	9.47	8.59	11.06	13.22	13.76	8.56	10.93	10.69	12.34	8.78
ASGR2	FXYD6	845	566	598	28	240	0.608	10.73	8.59	4.48	13.22	14.72	8.56	5.41	10.69	3.20	8.78
CCDC149	FXYD6	906	927	533	355	703	0.491	9.30	8.59	10.39	13.22	9.09	8.56	9.49	10.69	9.16	8.78
CTNNA1	FXYD6	718	351	852	545	698	0.205	12.33	8.59	12.78	13.22	12.76	8.56	14.43	10.69	12.86	8.78
CCND2	G3BP1	837	533	226	862	525	0.476	11.18	11.25	11.92	10.66	7.97	12.29	11.63	12.48	8.32	12.76
CSF3R	GAA	955	310	522	623	569	0.803	18.27	12.59	7.67	11.43	10.07	12.19	13.80	12.41	8.07	11.80
BCL3	GAB2	864	342	715	300	318	0.621	12.96	12.95	7.53	11.48	13.00	8.53	12.11	11.88	9.59	9.64
BCL6	GAB2	825	262	795	710	216	0.398	15.42	12.95	11.51	11.48	12.59	8.53	13.82	11.88	14.96	9.64
CHMP1B	GAB2	850	169	974	870	190	0.350	11.51	12.95	10.21	11.48	10.15	8.53	10.67	11.88	13.75	9.64
CPD	GAB2	923	540	671	733	736	0.506	13.16	12.95	10.70	11.48	12.03	8.53	12.42	11.88	10.88	9.64
DNAJB12	GAB2	784	453	864	817	770	0.149	11.56	12.95	10.56	11.48	11.01	8.53	10.85	11.88	11.33	9.64
DNTTIP1	GAB2	773	318	872	758	801	0.144	11.51	12.95	8.97	11.48	8.97	8.53	9.33	11.88	10.64	9.64
CKAP4	GABARAP	824	842	962	747	956	0.038	12.66	14.91	9.58	13.39	10.97	13.23	11.53	13.52	10.05	13.48
CORO1C	GABARAP	797	906	924	900	826	0.000	12.04	14.91	11.17	13.39	11.44	13.23	13.02	13.52	11.37	13.48
ADIPOR1	GADD45A	442	539	91	289	132	0.000	14.70	11.46	11.39	9.45	12.05	11.46	12.45	10.97	12.12	12.22
ATP6V0B	GADD45B	133	357	509	149	537	0.000	13.65	13.01	12.20	10.24	12.06	13.34	12.02	13.21	11.51	10.57
EFHD2	GADD45B	39	398	299	342	729	0.000	14.65	13.01	12.49	10.24	10.79	13.34	12.04	13.21	8.61	10.57
BCKDHA	GAK	928	779	777	708	370	0.474	11.37	12.69	10.50	12.08	12.08	12.24	10.21	12.64	12.04	11.37
ACSS2	GALNS	982	888	258	848	592	0.550	11.19	11.09	10.40	9.19	12.50	9.83	12.02	9.92	12.83	8.82
CSF3R	GALNS	924	148	478	558	703	0.718	18.27	11.09	7.67	9.19	10.07	9.83	13.80	9.92	8.07	8.82
GAB2	GALNS	780	486	777	667	680	0.248	12.95	11.09	11.48	9.19	8.53	9.83	11.88	9.92	9.64	8.82
CDK19	GALNT1	981	722	558	778	870	0.498	10.50	11.13	10.88	9.73	9.21	11.14	9.32	10.74	9.20	11.35
ARHGEF37	GALNT9	237	47	195	92	46	0.000	7.59	4.33	10.09	11.99	7.97	3.35	8.61	3.06	10.94	2.71
CD300LG	GALNT9	283	244	206	17	71	0.000	3.97	4.33	2.29	11.99	4.00	3.35	8.21	3.06	9.48	2.71
AKAP1	GART	941	978	482	850	578	0.448	9.26	10.20	11.42	9.68	12.35	10.65	11.05	10.40	13.22	10.99
C2orf42	GART	984	957	351	804	927	0.374	9.24	10.20	8.40	9.68	9.24	10.65	7.27	10.40	8.42	10.99
ABLIM3	GAS2L1	930	530	771	695	596	0.564	9.59	10.24	11.06	11.84	13.51	9.95	11.40	10.13	11.98	8.61
CTTN	GAS2L1	955	601	943	880	720	0.338	9.56	10.24	12.84	11.84	12.47	9.95	13.23	10.13	12.31	8.61
EPOR	GAS2L1	296	559	703	685	852	0.000	10.11	10.24	8.12	11.84	10.10	9.95	9.61	10.13	8.08	8.61
FAM63A	GAS2L1	907	128	698	967	628	0.448	11.72	10.24	9.16	11.84	10.01	9.95	9.49	10.13	10.03	8.61
FAXDC2	GAS2L1	462	104	44	704	691	0.000	11.01	10.24	10.92	11.84	12.04	9.95	11.36	10.13	9.41	8.61
FAM134B	GAS5	621	560	108	795	632	0.091	8.58	10.47	10.14	10.44	10.10	11.25	8.97	12.07	13.00	10.80
ACSS2	GAS7	959	789	24	560	572	0.708	11.19	13.36	10.40	14.35	12.50	7.49	12.02	11.95	12.83	9.20
ALDH2	GAS7	823	6	87	583	369	0.605	12.31	13.36	14.12	14.35	15.62	7.49	13.79	11.95	13.17	9.20
CEBPA	GAS7	791	182	86	233	213	0.582	6.26	13.36	1.59	14.35	6.52	7.49	2.61	11.95	4.42	9.20
CLMN	GAS7	1000	364	281	492	154	1.000	10.84	13.36	10.48	14.35	11.83	7.49	10.61	11.95	10.19	9.20
CUX1	GAS7	905	642	845	846	186	0.394	12.21	13.36	11.88	14.35	11.34	7.49	12.40	11.95	12.40	9.20
DENND1A	GAS7	518	944	663	872	94	0.009	11.31	13.36	11.33	14.35	10.18	7.49	9.45	11.95	10.30	9.20
EVI5	GAS7	934	849	171	778	236	0.554	8.88	13.36	9.11	14.35	10.32	7.49	9.77	11.95	9.00	9.20
COL1A1	GAS8	218	42	827	154	501	0.000	8.40	7.08	6.87	9.52	11.90	8.27	14.71	8.46	10.66	9.17
DOK1	GBA2	958	68	700	811	644	0.589	11.46	12.01	6.78	12.68	6.80	12.25	8.98	12.45	6.56	12.42
AHSA1	GCDH	885	242	253	734	862	0.472	11.40	9.95	12.01	9.16	11.28	12.05	11.14	8.73	12.06	10.20
DDX23	GCDH	841	605	154	890	547	0.435	11.95	9.95	11.27	9.16	11.83	12.05	11.90	8.73	11.97	10.20
DMAP1	GCDH	955	573	536	942	862	0.454	11.15	9.95	11.40	9.16	11.25	12.05	10.82	8.73	10.59	10.20
EIF2B4	GCDH	992	744	149	945	592	0.594	10.20	9.95	9.95	9.16	10.36	12.05	10.13	8.73	11.09	10.20
FTSJ1	GCDH	980	524	20	877	761	0.629	10.23	9.95	9.43	9.16	9.46	12.05	9.93	8.73	9.87	10.20
FTSJ3	GCDH	976	724	315	980	595	0.554	10.82	9.95	9.98	9.16	10.80	12.05	10.58	8.73	11.17	10.20
AP1G2	GCN1L1	957	904	633	905	768	0.309	11.36	11.41	10.84	11.33	9.27	12.01	9.95	12.32	7.34	13.08
C2orf42	GCN1L1	797	935	378	868	940	0.148	9.24	11.41	8.40	11.33	9.24	12.01	7.27	12.32	8.42	13.08
CARD11	GCN1L1	992	580	96	289	195	0.944	11.46	11.41	5.61	11.33	7.09	12.01	8.31	12.32	4.64	13.08
GCDH	GCN1L1	967	605	179	942	662	0.580	9.95	11.41	9.16	11.33	12.05	12.01	8.73	12.32	10.20	13.08
C2orf42	GEMIN4	931	941	847	896	937	0.059	9.24	9.48	8.40	8.30	9.24	9.52	7.27	9.80	8.42	10.18
FAM78A	GEMIN4	935	723	682	783	20	0.526	11.43	9.48	9.03	8.30	7.00	9.52	9.04	9.80	10.25	10.18
ATP5A1	GEMIN5	930	850	966	983	512	0.249	12.98	9.02	14.59	9.18	14.03	9.18	13.65	9.14	15.13	10.59
BUB3	GGA2	985	934	987	936	996	0.050	11.10	11.74	10.26	11.53	11.07	11.53	11.01	12.79	10.86	11.87
BTF3L4	GGCX	951	881	772	953	936	0.132	9.93	9.96	10.37	9.56	9.80	12.75	9.78	10.77	11.22	10.51
CCT6A	GGCX	923	929	894	977	968	0.015	11.14	9.96	11.85	9.56	11.72	12.75	12.04	10.77	12.86	10.51
COMMD2	GGCX	950	941	874	931	790	0.132	9.51	9.96	9.02	9.56	9.07	12.75	9.59	10.77	9.27	10.51
CTDSPL	GGTA1P	619	233	564	797	650	0.087	9.18	8.62	10.62	8.03	10.65	6.10	11.52	7.50	10.37	7.13
AHCYL1	GIT2	968	108	723	766	878	0.502	11.39	12.43	14.46	11.20	12.09	10.65	12.49	11.16	12.94	10.79
DES	GJB1	0	120	88	19	0	0.000	9.74	3.11	7.62	7.86	8.60	13.76	13.06	2.71	18.27	1.73
ANGPTL4	GJC2	317	91	90	22	25	0.000	6.89	6.47	9.56	7.95	12.55	4.52	9.98	6.54	9.43	5.27
APOE	GJC2	382	120	300	110	812	0.000	8.26	6.47	14.36	7.95	16.57	4.52	12.62	6.54	8.73	5.27
COL1A1	GJC2	395	82	622	214	894	0.000	8.40	6.47	6.87	7.95	11.90	4.52	14.71	6.54	10.66	5.27
ASGR2	GLB1	822	668	973	494	426	0.399	10.73	11.23	4.48	9.16	14.72	10.86	5.41	10.65	3.20	8.96
C10orf54	GLB1	898	329	899	817	902	0.239	16.77	11.23	10.76	9.16	9.18	10.86	12.82	10.65	10.07	8.96
EIF4EBP1	GLB1	755	500	660	909	428	0.302	10.27	11.23	5.74	9.16	10.68	10.86	9.06	10.65	10.77	8.96
CYSTM1	GLIPR2	901	385	921	774	276	0.465	13.01	13.44	10.56	8.00	10.17	7.51	11.46	11.39	12.44	8.06
DNTTIP1	GLIPR2	997	453	836	803	694	0.578	11.51	13.44	8.97	8.00	8.97	7.51	9.33	11.39	10.64	8.06
ANGPTL4	GLP1R	0	122	0	53	0	0.000	6.89	2.93	9.56	2.24	12.55	0.54	9.98	2.92	9.43	0.91
COL1A1	GLP1R	0	144	0	36	0	0.000	8.40	2.93	6.87	2.24	11.90	0.54	14.71	2.92	10.66	0.91
COL6A1	GLP1R	0	219	0	210	0	0.000	8.83	2.93	12.83	2.24	13.28	0.54	15.30	2.92	12.76	0.91
BCL2L1	GLRX5	994	912	394	920	79	0.572	13.65	11.37	12.01	10.61	12.21	11.38	12.90	9.48	11.39	11.56
DPM2	GLRX5	915	884	621	999	273	0.370	11.02	11.37	10.10	10.61	10.13	11.38	9.72	9.48	8.78	11.56
C5orf51	GLS	842	703	752	688	887	0.192	9.99	11.04	9.75	12.80	9.84	9.64	9.62	12.55	9.20	10.56
EIF2B5	GLT8D1	917	994	853	896	995	0.043	10.83	10.07	11.11	10.11	11.21	11.06	11.16	10.36	11.89	9.78
BNIP3L	GLUL	299	267	270	787	840	0.000	12.91	16.05	11.99	17.85	10.64	14.08	12.19	16.28	11.02	16.03
FAM214B	GLUL	121	420	390	658	358	0.000	12.64	16.05	10.63	17.85	9.48	14.08	10.80	16.28	9.94	16.03
AK1	GLYCTK	112	684	5	680	371	0.000	10.63	10.18	11.71	5.58	10.92	13.73	11.47	7.67	13.90	7.62
ANAPC11	GMFG	815	665	782	883	658	0.170	10.49	13.33	10.76	6.14	11.07	8.21	10.08	10.84	11.53	7.39
CD300LB	GNAI2	698	474	857	707	439	0.198	10.91	15.75	1.37	13.18	3.67	13.08	5.55	14.63	2.62	11.86
DNAJC5	GNAI2	983	307	919	861	928	0.362	13.04	15.75	13.80	13.18	11.25	13.08	12.02	14.63	11.17	11.86
DNAJC5	GNAI3	956	384	952	899	977	0.259	13.04	12.19	13.80	9.79	11.25	10.97	12.02	10.98	11.17	9.85
ENTPD1	GNAQ	1000	936	930	771	915	0.224	12.63	12.03	10.25	12.72	9.37	10.87	11.59	12.41	9.95	10.69
C1orf198	GNAZ	746	16	856	618	473	0.310	8.35	8.47	11.86	11.65	10.07	4.83	12.70	5.87	12.61	7.02
CLU	GNAZ	698	16	235	607	494	0.343	12.76	8.47	18.59	11.65	16.43	4.83	14.68	5.87	10.77	7.02
CTDSPL	GNAZ	967	445	231	779	361	0.794	9.18	8.47	10.62	11.65	10.65	4.83	11.52	5.87	10.37	7.02
ENDOD1	GNAZ	792	615	924	727	187	0.267	9.80	8.47	11.39	11.65	8.75	4.83	10.75	5.87	11.57	7.02
ESAM	GNAZ	948	27	843	734	741	0.487	9.49	8.47	9.85	11.65	9.21	4.83	13.19	5.87	10.52	7.02
FSTL1	GNAZ	544	31	717	378	424	0.066	8.75	8.47	10.39	11.65	11.17	4.83	14.56	5.87	11.59	7.02
GAS2L1	GNAZ	928	756	758	795	899	0.252	10.24	8.47	11.84	11.65	9.95	4.83	10.13	5.87	8.61	7.02
CNPY3	GNB1	965	768	607	901	999	0.309	13.36	13.80	10.14	15.30	11.38	12.77	11.12	13.99	8.85	11.78
DENND3	GNB2	973	835	931	782	906	0.219	14.35	14.46	11.74	12.56	9.20	12.63	13.24	13.27	10.45	12.26
EID2	GNB2L1	670	578	919	900	954	0.046	8.28	14.80	9.58	13.24	8.49	14.29	7.87	15.33	8.85	14.72
ANGPTL4	GNB3	449	98	97	151	46	0.000	6.89	4.68	9.56	8.15	12.55	4.45	9.98	5.65	9.43	5.29
CCNB1IP1	GNB5	956	842	47	881	736	0.432	9.46	9.03	9.93	10.86	10.64	9.61	10.36	8.29	10.92	7.17
CTTN	GNG11	952	177	777	584	588	0.679	9.56	9.61	12.84	8.71	12.47	9.02	13.23	11.59	12.31	9.78
EMC3	GNG11	684	165	742	291	376	0.276	12.01	9.61	10.63	8.71	10.85	9.02	10.46	11.59	12.37	9.78
ADPRM	GNL3	963	939	328	580	903	0.465	9.06	9.79	6.09	10.34	8.23	11.45	7.24	11.03	8.76	11.74
ACSL5	GNPAT	728	354	897	819	695	0.131	10.94	10.59	8.33	10.38	12.76	10.76	11.40	10.40	8.25	12.48
EXOSC2	GNPAT	823	960	962	931	847	0.000	9.58	10.59	9.33	10.38	9.84	10.76	9.16	10.40	9.77	12.48
ASF1A	GNPNAT1	977	627	946	740	650	0.472	8.74	7.19	8.95	6.79	8.54	10.26	8.41	7.43	9.24	8.76
DPH5	GNPNAT1	899	881	963	739	817	0.130	8.50	7.19	7.02	6.79	8.34	10.26	7.33	7.43	9.11	8.76
EEF1B2	GNPNAT1	806	775	945	923	564	0.137	11.53	7.19	12.04	6.79	12.86	10.26	13.01	7.43	13.65	8.76
ERCC6L2	GNPNAT1	928	955	908	739	934	0.104	8.78	7.19	8.45	6.79	8.71	10.26	8.79	7.43	9.33	8.76
GAS5	GNPNAT1	673	552	60	552	472	0.294	10.47	7.19	10.44	6.79	11.25	10.26	12.07	7.43	10.80	8.76
B4GALT5	GNS	990	946	949	760	929	0.188	12.86	13.48	10.64	10.62	11.05	11.77	11.83	13.23	12.62	11.76
DENND1A	GNS	802	823	858	896	984	0.000	11.31	13.48	11.33	10.62	10.18	11.77	9.45	13.23	10.30	11.76
GAS7	GNS	991	635	931	814	247	0.542	13.36	13.48	14.35	10.62	7.49	11.77	11.95	13.23	9.20	11.76
AKAP9	GON4L	992	992	671	941	724	0.320	10.40	11.21	11.00	10.62	12.22	10.59	11.83	11.28	12.01	11.17
ABHD14B	GORASP2	926	611	342	842	865	0.443	11.14	10.75	8.89	10.99	12.70	11.69	10.67	11.47	9.88	11.48
ADA	GOT1	971	120	761	251	382	0.811	10.05	9.19	6.77	13.05	7.50	13.94	8.07	9.56	8.35	13.67
FTSJ3	GOT1	864	461	728	949	30	0.432	10.82	9.19	9.98	13.05	10.80	13.94	10.58	9.56	11.17	13.67
ABLIM3	GP9	898	0	0	145	0	0.000	9.59	9.83	11.06	0.70	13.51	2.13	11.40	4.51	11.98	1.50
CLDN5	GP9	902	0	0	195	0	0.000	8.86	9.83	11.66	0.70	8.57	2.13	13.95	4.51	11.16	1.50
CTTN	GP9	966	0	0	434	0	0.000	9.56	9.83	12.84	0.70	12.47	2.13	13.23	4.51	12.31	1.50
DMTN	GP9	241	0	0	618	0	0.000	13.62	9.83	14.72	0.70	10.36	2.13	9.94	4.51	11.31	1.50
ESAM	GP9	987	0	0	526	0	0.000	9.49	9.83	9.85	0.70	9.21	2.13	13.19	4.51	10.52	1.50
GNAZ	GP9	927	0	0	733	0	0.000	8.47	9.83	11.65	0.70	4.83	2.13	5.87	4.51	7.02	1.50
CNPY4	GPALPP1	934	660	889	882	549	0.378	9.29	8.71	7.89	9.15	7.65	8.80	7.95	8.77	7.29	9.42
ECI2	GPALPP1	815	357	856	990	397	0.315	9.22	8.71	9.65	9.15	12.22	8.80	9.26	8.77	11.86	9.42
FASTKD1	GPALPP1	990	957	877	953	454	0.337	8.34	8.71	9.17	9.15	9.59	8.80	8.48	8.77	9.45	9.42
CCNB1IP1	GPATCH11	696	945	80	694	831	0.099	9.46	8.58	9.93	9.20	10.64	8.34	10.36	8.05	10.92	8.07
DPH5	GPATCH11	946	967	974	977	883	0.032	8.50	8.58	7.02	9.20	8.34	8.34	7.33	8.05	9.11	8.07
ADH5	GPATCH4	866	357	306	703	910	0.448	10.47	9.39	11.15	10.09	12.91	9.77	12.18	9.35	11.72	11.51
C1orf123	GPATCH4	910	767	749	618	485	0.503	10.05	9.39	10.23	10.09	10.02	9.77	9.93	9.35	10.86	11.51
C9orf114	GPATCH4	987	594	312	841	837	0.588	10.19	9.39	10.40	10.09	10.63	9.77	9.60	9.35	10.01	11.51
BCL6	GPCPD1	704	43	679	603	658	0.188	15.42	13.13	11.51	11.10	12.59	10.29	13.82	12.80	14.96	11.02
AK2	GPN1	997	766	973	989	988	0.136	11.59	10.27	10.23	9.64	12.60	9.43	11.53	9.53	11.78	10.37
ALG5	GPN1	985	819	999	1000	998	0.083	9.21	10.27	7.92	9.64	10.25	9.43	9.13	9.53	8.98	10.37
ALDH2	GPR107	837	433	183	961	546	0.482	12.31	11.53	14.12	11.86	15.62	11.22	13.79	12.03	13.17	11.53
CALCOCO2	GPR107	886	741	986	935	998	0.072	12.24	11.53	10.94	11.86	12.12	11.22	12.92	12.03	12.94	11.53
ALDOA	GPR108	983	516	908	893	103	0.557	16.43	12.41	16.81	10.43	13.08	11.07	14.97	11.10	17.22	9.91
COL1A1	GPR137	79	71	429	677	272	0.000	8.40	10.43	6.87	11.43	11.90	10.21	14.71	9.37	10.66	9.24
C1orf21	GPR56	1000	80	256	462	452	1.000	9.70	11.55	12.35	13.08	10.82	8.34	11.47	11.86	13.62	10.02
CACNA2D2	GPR56	1000	9	518	171	497	0.991	8.53	11.55	9.49	13.08	5.92	8.34	11.55	11.86	7.82	10.02
ARHGAP4	GPS2	917	652	899	822	831	0.232	14.14	12.00	8.55	11.01	9.65	10.91	12.18	10.81	8.61	12.19
ASNA1	GPSM3	806	53	941	683	794	0.221	11.29	15.11	11.23	6.50	10.27	8.65	10.37	11.16	10.86	7.28
AURKAIP1	GPSM3	994	169	732	834	682	0.614	11.71	15.11	11.45	6.50	12.09	8.65	10.52	11.16	12.16	7.28
CHMP2A	GPSM3	1000	316	894	877	838	0.446	12.87	15.11	11.32	6.50	11.57	8.65	11.39	11.16	11.82	7.28
COPE	GPSM3	992	327	860	878	886	0.422	12.98	15.11	12.04	6.50	12.34	8.65	11.87	11.16	11.49	7.28
DEDD2	GPSM3	939	183	819	795	836	0.403	13.00	15.11	10.25	6.50	9.94	8.65	9.95	11.16	9.57	7.28
GPS2	GPSM3	774	350	899	820	791	0.137	12.00	15.11	11.01	6.50	10.91	8.65	10.81	11.16	12.19	7.28
DMTN	GPX1	515	804	655	735	705	0.000	13.62	13.80	14.72	11.51	10.36	13.18	9.94	12.85	11.31	11.27
FAXDC2	GPX1	687	194	64	289	505	0.371	11.01	13.80	10.92	11.51	12.04	13.18	11.36	12.85	9.41	11.27
ACAA1	GRAMD1A	990	942	5	660	683	0.588	12.55	13.69	10.95	11.03	14.06	10.35	10.97	12.62	10.62	11.78
F11R	GRB2	982	255	991	812	662	0.486	12.28	12.88	8.53	11.13	12.90	10.55	13.40	11.21	9.37	10.90
ANGPTL4	GRIK5	367	28	205	203	340	0.000	6.89	6.79	9.56	11.70	12.55	5.17	9.98	4.95	9.43	6.25
CARD10	GRIN1	168	63	86	315	120	0.000	5.09	4.28	6.74	15.49	10.97	2.64	9.49	3.16	9.03	3.35
COL1A1	GRIN1	269	66	523	118	102	0.000	8.40	4.28	6.87	15.49	11.90	2.64	14.71	3.16	10.66	3.35
CDKN1A	GRINA	21	257	495	372	753	0.000	11.53	14.64	9.70	13.83	12.43	14.04	13.29	13.63	12.99	12.23
FCGRT	GRK6	986	17	391	843	720	0.691	13.82	13.69	9.79	10.19	13.71	9.40	13.32	10.55	11.02	9.89
COL1A1	GRM4	0	67	0	100	410	0.000	8.40	3.60	6.87	7.60	11.90	1.55	14.71	1.76	10.66	3.14
ASGR2	GRN	794	514	984	392	569	0.400	10.73	14.41	4.48	10.49	14.72	12.21	5.41	14.41	3.20	11.40
CCDC109B	GRPEL2	961	514	881	493	448	0.725	10.24	8.23	5.46	8.44	6.05	8.79	8.12	9.78	6.87	9.24
C21orf91	GRSF1	983	330	902	778	618	0.567	9.55	10.74	7.59	11.88	8.42	11.42	8.66	11.18	8.42	13.18
DHRS4-AS1	GRSF1	966	776	188	984	717	0.453	8.44	10.74	8.64	11.88	10.59	11.42	7.95	11.18	8.48	13.18
ANXA4	GSR	940	311	888	960	822	0.305	10.66	11.66	8.89	9.83	12.12	11.30	11.82	10.39	9.84	10.85
CTSC	GSR	980	641	940	978	249	0.430	12.74	11.66	6.93	9.83	10.18	11.30	12.96	10.39	9.13	10.85
CIRH1A	GSTK1	799	875	136	567	18	0.415	9.74	13.03	10.10	10.85	9.84	13.54	9.82	12.19	11.51	11.78
C10orf11	GSTP1	866	599	162	803	376	0.531	7.98	12.35	4.39	11.89	7.66	9.64	6.46	13.80	6.24	12.58
EPC2	GTF2E1	1000	983	966	946	764	0.171	10.00	8.61	9.61	7.36	9.23	8.10	9.69	7.37	10.33	8.83
AK2	GTF2E2	890	813	842	968	958	0.062	11.59	10.12	10.23	8.69	12.60	10.09	11.53	9.46	11.78	9.18
ACSL5	GTF2H1	839	41	706	852	898	0.236	10.94	10.05	8.33	9.98	12.76	9.96	11.40	9.84	8.25	10.18
COQ4	GTF3A	937	817	901	851	885	0.147	10.08	11.71	10.78	11.36	11.52	11.88	10.30	10.84	10.08	12.59
ECHDC2	GTF3A	831	106	61	254	582	0.621	10.04	11.71	10.14	11.36	14.81	11.88	11.26	10.84	11.29	12.59
EXOSC2	GTF3A	985	969	982	958	837	0.097	9.58	11.71	9.33	11.36	9.84	11.88	9.16	10.84	9.77	12.59
DUSP2	GTF3C1	845	800	218	148	298	0.540	11.22	11.38	8.29	12.03	7.31	11.27	8.63	11.72	6.91	12.50
FAM78A	GTF3C2	999	648	640	887	15	0.660	11.43	10.67	9.03	10.07	7.00	10.38	9.04	10.56	10.25	10.73
CARD11	GTPBP6	907	505	465	287	532	0.795	11.46	10.41	5.61	10.50	7.09	10.85	8.31	10.28	4.64	11.05
CIRH1A	GTPBP6	989	590	589	800	688	0.644	9.74	10.41	10.10	10.50	9.84	10.85	9.82	10.28	11.51	11.05
ANAPC16	GTPBP8	953	693	901	989	900	0.182	11.73	8.03	10.38	6.61	11.96	7.50	11.58	6.89	12.64	9.44
BNIP3	GTPBP8	799	938	936	903	348	0.149	9.50	8.03	11.44	6.61	12.07	7.50	9.81	6.89	12.63	9.44
C14orf28	GTPBP8	888	881	584	621	572	0.447	7.24	8.03	6.57	6.61	8.27	7.50	7.02	6.89	7.42	9.44
CASD1	GTPBP8	976	965	884	994	956	0.061	8.55	8.03	10.19	6.61	9.08	7.50	9.57	6.89	10.13	9.44
GAS5	GTPBP8	861	650	427	750	51	0.522	10.47	8.03	10.44	6.61	11.25	7.50	12.07	6.89	10.80	9.44
GAS2L1	GUCY1A3	626	572	520	664	693	0.080	10.24	6.77	11.84	8.59	9.95	8.17	10.13	9.91	8.61	8.44
ABCC3	GUCY1B3	736	504	214	319	693	0.373	10.18	7.63	5.37	11.50	14.13	8.46	11.09	10.29	5.97	8.90
AIMP2	GUSB	773	586	926	830	564	0.198	8.43	11.74	6.79	9.61	8.54	12.29	7.07	11.43	10.85	9.89
ATP5A1	GUSB	925	461	984	988	279	0.425	12.98	11.74	14.59	9.61	14.03	12.29	13.65	11.43	15.13	9.89
ATP5B	GUSB	935	418	991	932	304	0.436	13.74	11.74	14.91	9.61	14.35	12.29	14.31	11.43	15.46	9.89
COPS6	GUSB	961	686	974	962	987	0.138	11.09	11.74	11.80	9.61	11.13	12.29	10.99	11.43	11.93	9.89
CYC1	GUSB	944	601	958	960	481	0.394	11.42	11.74	11.83	9.61	12.48	12.29	11.03	11.43	13.47	9.89
CEBPB	GYG1	612	578	348	672	669	0.073	13.99	13.35	9.38	10.41	13.22	9.30	12.98	11.04	12.77	14.29
FXYD5	H1FX	892	353	268	610	716	0.621	13.57	12.06	7.37	11.04	8.87	11.16	11.78	11.44	9.03	10.99
ELP2	HABP4	911	843	639	844	921	0.203	10.12	8.60	11.00	12.35	11.56	8.25	10.83	8.96	11.66	9.71
FAM102A	HABP4	977	830	310	846	620	0.556	11.21	8.60	12.67	12.35	11.19	8.25	10.81	8.96	8.69	9.71
ATP6V0A2	HACL1	990	839	917	954	927	0.162	10.00	9.30	8.98	8.37	9.23	10.53	9.98	8.44	10.05	9.80
BMS1	HACL1	969	980	774	940	929	0.132	10.14	9.30	10.39	8.37	10.60	10.53	10.80	8.44	11.65	9.80
AGK	HADH	982	724	568	708	427	0.714	9.76	9.31	10.56	9.88	10.09	12.92	9.99	10.15	9.39	12.83
ARHGEF3	HADH	897	620	141	537	152	0.716	10.98	9.31	10.85	9.88	7.58	12.92	10.63	10.15	9.47	12.83
DNAJC9	HADH	989	640	105	821	218	0.748	8.39	9.31	8.43	9.88	7.86	12.92	7.47	10.15	8.46	12.83
EBNA1BP2	HADH	820	708	633	898	28	0.309	9.31	9.31	10.74	9.88	12.13	12.92	9.82	10.15	10.49	12.83
EIF5B	HADH	946	583	128	708	80	0.747	10.79	9.31	12.06	9.88	12.21	12.92	12.28	10.15	13.41	12.83
FAM104A	HAGH	665	848	74	914	837	0.083	10.31	11.71	8.03	11.55	8.31	12.58	8.12	10.14	9.09	12.09
ANGPTL4	HAP1	0	841	21	20	118	0.000	6.89	3.18	9.56	9.73	12.55	4.37	9.98	4.95	9.43	4.39
COL6A1	HAP1	0	277	554	471	585	0.000	8.83	3.18	12.83	9.73	13.28	4.37	15.30	4.95	12.76	4.39
ADH5	HARS	922	487	335	908	955	0.429	10.47	10.62	11.15	11.95	12.91	11.07	12.18	10.63	11.72	11.15
CARD11	HARS	800	633	12	332	135	0.533	11.46	10.62	5.61	11.95	7.09	11.07	8.31	10.63	4.64	11.15
DIS3L	HARS	991	904	645	913	511	0.495	9.52	10.62	10.21	11.95	9.94	11.07	9.15	10.63	11.13	11.15
FUK	HARS	1000	645	624	914	907	0.455	10.06	10.62	9.49	11.95	10.18	11.07	9.51	10.63	9.57	11.15
GCDH	HARS	988	403	210	936	803	0.607	9.95	10.62	9.16	11.95	12.05	11.07	8.73	10.63	10.20	11.15
EVL	HAUS5	1000	488	524	876	571	0.764	12.73	9.51	13.78	9.08	12.91	9.33	12.35	9.30	10.51	9.09
CLIC4	HCCS	901	197	425	669	386	0.718	10.09	9.84	11.33	8.58	11.83	9.03	14.16	8.48	11.51	10.87
ARHGEF37	HCN2	287	176	526	385	272	0.000	7.59	6.53	10.09	12.68	7.97	4.04	8.61	3.18	10.94	3.84
DDX46	HDAC1	995	339	960	962	772	0.393	11.13	12.05	10.41	9.64	11.04	11.54	11.24	11.65	11.86	9.87
EVL	HDAC1	707	45	803	742	539	0.188	12.73	12.05	13.78	9.64	12.91	11.54	12.35	11.65	10.51	9.87
GRSF1	HDAC1	991	259	978	967	682	0.418	10.74	12.05	11.88	9.64	11.42	11.54	11.18	11.65	13.18	9.87
DHRS7B	HDAC4	963	687	858	789	60	0.509	9.86	11.79	8.81	10.80	8.99	9.03	8.94	9.87	10.16	12.98
CTSB	HDGF	404	743	911	545	916	0.000	14.59	13.20	14.05	12.30	14.91	13.58	15.69	13.07	13.53	13.43
ENOSF1	HEATR1	932	545	334	761	443	0.711	8.76	9.40	8.48	8.59	11.94	9.47	10.47	9.81	9.61	10.08
ARHGAP17	HEATR5B	990	473	828	666	972	0.497	10.30	10.33	8.56	10.31	9.51	10.55	10.59	10.65	10.67	9.73
CHD1L	HEATR5B	917	723	613	815	973	0.300	10.46	10.33	10.28	10.31	11.33	10.55	10.64	10.65	10.31	9.73
AIF1	HEBP2	977	497	654	611	639	0.752	12.41	11.77	6.11	8.87	7.75	11.97	10.00	10.73	6.51	12.07
C19orf59	HEBP2	980	602	417	577	215	0.871	13.16	11.77	2.26	8.87	4.81	11.97	10.23	10.73	3.80	12.07
GLRX	HEBP2	998	481	824	762	639	0.633	11.63	11.77	9.51	8.87	11.75	11.97	10.95	10.73	13.06	12.07
CHCHD1	HEIH	0	0	0	0	0	0.000	9.80	0.00	9.04	0.00	9.89	0.00	8.70	0.00	9.91	0.00
ABCF2	HEMK1	955	689	80	627	526	0.739	10.66	9.93	11.35	8.83	10.03	11.10	10.65	10.06	12.40	9.00
C10orf2	HEMK1	756	638	139	602	452	0.392	8.15	9.93	7.25	8.83	8.68	11.10	6.85	10.06	9.81	9.00
CERK	HEMK1	769	539	394	444	288	0.518	12.18	9.93	11.53	8.83	10.91	11.10	11.07	10.06	11.09	9.00
EVL	HEMK1	996	673	672	658	698	0.641	12.73	9.93	13.78	8.83	12.91	11.10	12.35	10.06	10.51	9.00
CECR5	HEXA	837	948	924	888	466	0.169	10.09	10.98	9.49	9.42	11.00	10.37	9.45	11.08	10.69	9.93
EIF4EBP1	HEXA	827	307	729	764	744	0.285	10.27	10.98	5.74	9.42	10.68	10.37	9.06	11.08	10.77	9.93
ERCC1	HEXA	942	972	737	832	900	0.178	10.79	10.98	10.64	9.42	10.21	10.37	10.45	11.08	11.11	9.93
ASGR2	HEXB	829	687	987	403	559	0.370	10.73	11.77	4.48	9.39	14.72	11.45	5.41	12.18	3.20	10.52
FXYD6	HEXB	889	846	873	260	495	0.418	8.59	11.77	13.22	9.39	8.56	11.45	10.69	12.18	8.78	10.52
CAMK2B	HEYL	384	10	28	217	478	0.000	5.38	4.86	14.04	7.41	9.15	8.23	3.76	11.16	12.91	9.05
GALNT9	HEYL	137	4	307	66	379	0.000	4.33	4.86	11.99	7.41	3.35	8.23	3.06	11.16	2.71	9.05
GRIN1	HEYL	157	23	488	95	109	0.000	4.28	4.86	15.49	7.41	2.64	8.23	3.16	11.16	3.35	9.05
CCDC88B	HGS	982	627	856	732	705	0.504	13.95	12.07	9.51	11.88	9.19	11.16	11.27	11.82	7.57	11.61
HDAC2	HIBADH	844	710	722	918	650	0.225	10.62	8.63	10.52	9.43	10.16	12.28	11.01	9.38	11.22	11.73
ARL6IP6	HIGD1A	968	633	470	878	566	0.647	9.89	10.14	8.03	12.76	8.05	13.09	8.71	11.30	8.59	12.14
GEMIN6	HIGD1A	803	803	690	810	804	0.057	7.90	10.14	7.38	12.76	8.81	13.09	6.74	11.30	8.14	12.14
DIS3L	HINFP	955	881	350	851	674	0.457	9.52	10.29	10.21	9.85	9.94	9.44	9.15	9.24	11.13	9.64
CCNB1IP1	HINT1	932	883	181	862	677	0.403	9.46	11.01	9.93	12.90	10.64	13.50	10.36	12.22	10.92	12.88
FAM84B	HINT1	792	192	353	865	582	0.397	7.60	11.01	8.15	12.90	10.17	13.50	10.20	12.22	7.96	12.88
ATIC	HIRIP3	996	824	735	806	848	0.386	10.39	9.29	10.72	9.59	10.81	9.28	10.26	8.87	11.27	10.28
CTNNA1	HK1	818	456	971	992	900	0.159	12.33	12.83	12.78	13.57	12.76	9.23	14.43	12.57	12.86	13.74
CYB5R3	HK1	837	330	843	900	871	0.169	12.49	12.83	12.82	13.57	13.71	9.23	13.78	12.57	12.96	13.74
FRY	HK2	539	98	818	407	60	0.059	10.73	12.63	11.06	5.99	10.32	6.47	11.15	10.58	10.83	11.62
CD300LB	HLA-B	738	521	834	647	464	0.273	10.91	17.85	1.37	11.69	3.67	13.79	5.55	16.61	2.62	12.43
ATP5B	HLA-DMA	707	184	364	602	274	0.363	13.74	11.56	14.91	6.73	14.35	8.90	14.31	12.02	15.46	8.66
DNPEP	HLA-DMA	993	528	534	638	584	0.844	10.43	11.56	9.85	6.73	11.25	8.90	11.19	12.02	11.79	8.66
ECHS1	HLA-DMB	881	186	255	720	422	0.652	10.75	11.24	12.15	5.70	14.92	7.71	10.96	11.23	12.67	7.73
BCL7A	HLA-DOA	967	222	211	516	330	0.926	7.86	10.15	10.79	4.67	9.09	6.87	8.53	9.91	10.10	6.18
COX5A	HLA-DPA1	475	183	497	531	307	0.000	10.86	12.85	11.96	8.10	11.92	10.06	10.65	13.95	13.74	9.82
BLCAP	HLA-DRA	487	129	137	741	711	0.000	10.88	14.02	12.78	8.60	12.32	10.90	11.10	15.51	14.05	10.70
BZW2	HMG20A	996	983	555	544	655	0.624	9.81	10.02	9.33	10.51	9.12	10.82	9.84	10.45	12.65	11.08
FARSA	HMGCL	849	456	212	961	403	0.523	10.63	10.43	11.62	9.21	10.82	13.52	9.94	9.80	11.16	10.64
CES2	HMHA1	921	602	654	789	679	0.480	10.56	15.06	11.23	8.97	14.07	10.04	10.51	12.50	11.53	8.50
CPSF3L	HMHA1	953	760	891	958	923	0.142	11.85	15.06	11.90	8.97	11.87	10.04	11.95	12.50	12.27	8.50
DPYSL2	HMOX1	510	504	702	87	219	0.013	10.47	12.80	15.09	7.00	10.17	11.49	13.73	12.07	10.69	10.72
GABARAP	HN1	996	686	997	979	879	0.222	14.91	12.51	13.39	10.72	13.23	9.27	13.52	9.83	13.48	10.96
ANKRD46	HN1L	947	182	247	834	286	0.727	7.77	9.83	10.73	8.62	10.25	11.82	8.45	10.75	10.73	10.47
ARL1	HN1L	974	175	968	976	806	0.324	9.11	9.83	11.04	8.62	11.31	11.82	10.95	10.75	11.27	10.47
CYB5B	HN1L	920	131	810	986	901	0.275	10.61	9.83	10.90	8.62	10.63	11.82	10.71	10.75	10.66	10.47
DIMT1	HN1L	966	491	978	956	962	0.240	9.39	9.83	9.59	8.62	9.04	11.82	9.52	10.75	9.73	10.47
DNAJC19	HN1L	932	151	501	921	448	0.653	8.17	9.83	9.61	8.62	10.30	11.82	8.61	10.75	10.86	10.47
ECI2	HN1L	951	356	157	951	206	0.676	9.22	9.83	9.65	8.62	12.22	11.82	9.26	10.75	11.86	10.47
COL6A1	HNF1A	331	511	476	451	238	0.000	8.83	5.33	12.83	5.92	13.28	11.10	15.30	3.12	12.76	4.51
ANAPC7	HNRNPA2B1	865	875	974	891	955	0.000	10.64	13.94	10.89	14.46	10.54	14.53	10.46	15.49	11.06	14.93
ECHS1	HNRNPAB	960	859	65	869	62	0.556	10.75	11.13	12.15	10.23	14.92	11.86	10.96	11.81	12.67	12.03
HDAC1	HNRNPDL	887	365	886	809	906	0.233	12.05	12.18	9.64	13.47	11.54	12.84	11.65	14.00	9.87	13.60
GSR	HNRNPF	763	548	980	967	783	0.107	11.66	12.68	9.83	10.54	11.30	13.00	10.39	12.81	10.85	12.10
ARHGEF6	HNRNPUL2	966	326	836	622	25	0.703	11.94	12.40	10.49	13.24	8.77	11.91	11.28	12.63	11.80	12.68
ECI2	HNRNPUL2	812	291	705	996	309	0.365	9.22	12.40	9.65	13.24	12.22	11.91	9.26	12.63	11.86	12.68
HDAC1	HNRNPUL2	1000	187	996	982	962	0.280	12.05	12.40	9.64	13.24	11.54	11.91	11.65	12.63	9.87	12.68
AGPAT2	HOMER3	917	165	193	338	602	0.783	11.77	10.77	8.54	9.44	13.80	7.36	11.21	9.45	10.14	11.45
ALDH2	HOMER3	751	197	163	422	523	0.490	12.31	10.77	14.12	9.44	15.62	7.36	13.79	9.45	13.17	11.45
APLP2	HOMER3	857	343	754	444	689	0.492	14.29	10.77	14.14	9.44	14.20	7.36	15.53	9.45	12.35	11.45
DNTTIP1	HOMER3	838	351	848	532	612	0.435	11.51	10.77	8.97	9.44	8.97	7.36	9.33	9.45	10.64	11.45
DAP	HPCAL1	864	402	869	872	476	0.364	12.13	12.64	10.71	12.89	13.23	11.39	12.28	12.55	9.03	9.88
AK2	HPRT1	926	350	933	998	874	0.239	11.59	9.75	10.23	11.07	12.60	9.30	11.53	8.69	11.78	9.56
ARHGEF37	HR	244	385	243	380	174	0.000	7.59	4.43	10.09	11.76	7.97	5.79	8.61	6.17	10.94	7.15
COL6A1	HR	506	604	553	596	691	0.000	8.83	4.43	12.83	11.76	13.28	5.79	15.30	6.17	12.76	7.15
HEYL	HR	465	2	555	602	761	0.000	4.86	4.43	7.41	11.76	8.23	5.79	11.16	6.17	9.05	7.15
COL6A1	HRH3	0	662	0	0	0	0.000	8.83	2.79	12.83	10.37	13.28	1.19	15.30	0.70	12.76	2.42
CHMP2A	HS1BP3	976	871	930	980	993	0.075	12.87	11.07	11.32	9.06	11.57	10.42	11.39	10.06	11.82	9.53
CARD10	HSD11B1L	476	284	293	654	465	0.000	5.09	6.92	6.74	11.50	10.97	7.35	9.49	6.29	9.03	8.18
COL1A1	HSD11B1L	291	51	111	349	450	0.000	8.40	6.92	6.87	11.50	11.90	7.35	14.71	6.29	10.66	8.18
HEYL	HSD11B1L	340	94	284	514	440	0.000	4.86	6.92	7.41	11.50	8.23	7.35	11.16	6.29	9.05	8.18
FRAT2	HSD17B11	995	646	265	743	566	0.762	13.13	12.73	7.67	8.94	9.65	12.36	8.75	11.22	8.57	9.12
DROSHA	HSD17B4	745	811	888	923	986	0.000	9.91	11.17	10.95	12.07	10.01	13.93	10.34	12.62	10.79	11.79
ADSL	HSD17B8	602	470	361	843	686	0.102	10.59	8.30	9.07	6.81	10.19	10.24	9.86	7.53	12.92	8.88
ATIC	HSD17B8	982	564	179	793	226	0.785	10.39	8.30	10.72	6.81	10.81	10.24	10.26	7.53	11.27	8.88
CCT3	HSD17B8	805	141	164	679	427	0.520	11.84	8.30	12.29	6.81	12.53	10.24	12.15	7.53	12.75	8.88
EBNA1BP2	HSD17B8	442	435	685	757	64	0.000	9.31	8.30	10.74	6.81	12.13	10.24	9.82	7.53	10.49	8.88
FBL	HSD17B8	994	509	526	862	235	0.789	11.57	8.30	9.99	6.81	10.79	10.24	11.15	7.53	11.32	8.88
GPATCH4	HSD17B8	906	302	25	525	34	0.799	9.39	8.30	10.09	6.81	9.77	10.24	9.35	7.53	11.51	8.88
HARS	HSD17B8	857	337	119	814	120	0.557	10.62	8.30	11.95	6.81	11.07	10.24	10.63	7.53	11.15	8.88
CDK19	HSDL2	950	310	738	958	257	0.556	10.50	11.41	10.88	10.71	9.21	12.79	9.32	10.38	9.20	12.91
FRAT2	HSDL2	994	39	659	857	132	0.730	13.13	11.41	7.67	10.71	9.65	12.79	8.75	10.38	8.57	12.91
GSK3B	HSDL2	997	183	863	974	703	0.474	11.34	11.41	11.28	10.71	10.82	12.79	10.91	10.38	11.42	12.91
CCNB1IP1	HSPA14	697	963	99	803	785	0.099	9.46	9.38	9.93	8.99	10.64	9.18	10.36	9.11	10.92	10.15
CWC15	HSPA14	899	970	958	921	926	0.000	9.92	9.38	10.45	8.99	10.54	9.18	9.94	9.11	11.42	10.15
ATP6V1B2	HSPA1A	33	44	35	57	52	0.000	13.91	14.07	13.89	11.87	11.51	13.29	12.98	12.51	12.08	11.61
CAP1	HSPA1A	16	305	9	23	224	0.000	15.51	14.07	12.28	11.87	12.26	13.29	13.94	12.51	11.20	11.61
CHRNB2	HSPG2	53	3	187	524	177	0.000	4.72	8.02	10.87	8.19	3.02	10.58	1.84	13.60	2.52	12.97
ACADM	HSPH1	259	381	127	424	77	0.000	9.33	11.31	10.77	13.16	12.80	11.30	9.71	11.70	12.99	11.44
C5orf51	HSPH1	37	599	538	371	695	0.000	9.99	11.31	9.75	13.16	9.84	11.30	9.62	11.70	9.20	11.44
HMG20A	HSPH1	536	627	486	398	275	0.054	10.02	11.31	10.51	13.16	10.82	11.30	10.45	11.70	11.08	11.44
ENTPD1	HTATIP2	997	739	763	595	821	0.535	12.63	11.24	10.25	8.56	9.37	11.28	11.59	10.08	9.95	10.01
GJB1	HTRA3	101	7	32	20	47	0.000	3.11	7.80	7.86	4.12	13.76	7.19	2.71	10.78	1.73	10.38
ANKRD40	HYLS1	734	138	714	870	896	0.127	9.25	7.77	11.77	7.37	10.05	7.68	10.65	5.26	12.61	6.92
BFAR	HYLS1	734	939	612	835	638	0.109	10.75	7.77	9.40	7.37	10.13	7.68	10.93	5.26	11.11	6.92
CEPT1	HYLS1	865	794	773	821	771	0.150	10.18	7.77	8.48	7.37	10.10	7.68	9.81	5.26	9.06	6.92
ECI2	HYLS1	765	195	763	940	110	0.266	9.22	7.77	9.65	7.37	12.22	7.68	9.26	5.26	11.86	6.92
FAM78A	HYOU1	284	927	659	393	13	0.000	11.43	11.02	9.03	11.69	7.00	12.85	9.04	12.02	10.25	10.36
AARS	ICAM2	977	154	865	718	691	0.567	10.69	10.62	13.64	6.48	12.72	6.26	12.45	9.55	12.26	8.59
ABHD14A	ICAM2	990	132	545	553	535	0.913	8.84	10.62	10.56	6.48	8.95	6.26	7.80	9.55	9.20	8.59
ACAD9	ICAM2	919	79	839	617	619	0.550	9.99	10.62	10.13	6.48	10.59	6.26	9.91	9.55	10.81	8.59
ACD	ICAM2	935	210	690	759	771	0.510	10.31	10.62	10.16	6.48	8.50	6.26	8.98	9.55	8.83	8.59
ADH5	ICAM2	429	661	408	613	613	0.000	10.47	10.62	11.15	6.48	12.91	6.26	12.18	9.55	11.72	8.59
AIMP2	ICAM2	507	534	793	544	452	0.004	8.43	10.62	6.79	6.48	8.54	6.26	7.07	9.55	10.85	8.59
AKR1A1	ICAM2	763	210	336	486	577	0.487	11.06	10.62	10.32	6.48	13.11	6.26	11.49	9.55	10.34	8.59
ANAPC11	ICAM2	527	431	796	675	751	0.013	10.49	10.62	10.76	6.48	11.07	6.26	10.08	9.55	11.53	8.59
APEH	ICAM2	670	97	695	493	624	0.193	11.53	10.62	11.27	6.48	11.97	6.26	10.92	9.55	12.44	8.59
APRT	ICAM2	982	284	636	533	717	0.771	11.58	10.62	9.17	6.48	11.79	6.26	10.75	9.55	10.06	8.59
ATIC	ICAM2	994	413	856	499	474	0.810	10.39	10.62	10.72	6.48	10.81	6.26	10.26	9.55	11.27	8.59
ATP5A1	ICAM2	719	174	869	664	581	0.206	12.98	10.62	14.59	6.48	14.03	6.26	13.65	9.55	15.13	8.59
ATP6V0E2	ICAM2	950	19	34	433	577	0.862	9.72	10.62	13.70	6.48	11.53	6.26	8.21	9.55	8.87	8.59
B3GALT6	ICAM2	288	37	470	484	464	0.000	9.31	10.62	9.63	6.48	9.68	6.26	8.61	9.55	9.29	8.59
BZW2	ICAM2	870	94	858	473	707	0.458	9.81	10.62	9.33	6.48	9.12	6.26	9.84	9.55	12.65	8.59
C11orf83	ICAM2	626	348	655	628	688	0.063	7.89	10.62	6.80	6.48	8.06	6.26	6.26	9.55	8.28	8.59
C9orf114	ICAM2	985	369	485	568	669	0.852	10.19	10.62	10.40	6.48	10.63	6.26	9.60	9.55	10.01	8.59
CCDC12	ICAM2	831	151	581	795	758	0.345	10.46	10.62	9.38	6.48	9.87	6.26	9.71	9.55	10.09	8.59
CCNB1IP1	ICAM2	981	389	88	773	737	0.707	9.46	10.62	9.93	6.48	10.64	6.26	10.36	9.55	10.92	8.59
CCT3	ICAM2	962	453	871	592	721	0.582	11.84	10.62	12.29	6.48	12.53	6.26	12.15	9.55	12.75	8.59
CHTF8	ICAM2	304	203	466	552	549	0.000	9.86	10.62	8.46	6.48	9.75	6.26	8.61	9.55	8.99	8.59
COA4	ICAM2	900	534	826	638	687	0.458	9.64	10.62	8.75	6.48	10.99	6.26	9.25	9.55	10.38	8.59
COG2	ICAM2	706	222	599	563	345	0.331	9.65	10.62	9.52	6.48	9.51	6.26	9.29	9.55	10.44	8.59
CYB561D2	ICAM2	613	163	764	428	235	0.170	10.48	10.62	7.21	6.48	9.72	6.26	8.52	9.55	8.23	8.59
DAD1	ICAM2	427	697	940	814	778	0.000	11.84	10.62	10.91	6.48	11.50	6.26	11.66	9.55	11.00	8.59
DDX56	ICAM2	985	283	705	696	602	0.719	11.45	10.62	11.12	6.48	11.79	6.26	11.39	9.55	11.28	8.59
DHPS	ICAM2	963	169	851	837	843	0.410	11.03	10.62	10.94	6.48	10.69	6.26	10.54	9.55	11.51	8.59
DIS3L	ICAM2	867	149	648	506	491	0.657	9.52	10.62	10.21	6.48	9.94	6.26	9.15	9.55	11.13	8.59
EBAG9	ICAM2	626	244	772	722	540	0.106	8.78	10.62	9.32	6.48	9.77	6.26	8.98	9.55	10.15	8.59
EDF1	ICAM2	960	227	747	770	868	0.477	12.20	10.62	12.47	6.48	13.20	6.26	12.29	9.55	12.43	8.59
ELAC2	ICAM2	986	238	764	608	775	0.648	10.72	10.62	11.03	6.48	11.65	6.26	10.78	9.55	12.00	8.59
EMG1	ICAM2	657	480	842	748	603	0.105	9.18	10.62	7.80	6.48	9.08	6.26	8.86	9.55	9.54	8.59
FARSA	ICAM2	974	66	832	534	577	0.727	10.63	10.62	11.62	6.48	10.82	6.26	9.94	9.55	11.16	8.59
GTPBP6	ICAM2	984	202	403	744	747	0.723	10.41	10.62	10.50	6.48	10.85	6.26	10.28	9.55	11.05	8.59
HDHD2	ICAM2	442	195	826	705	551	0.000	9.14	10.62	10.36	6.48	9.46	6.26	8.65	9.55	9.37	8.59
HMGCL	ICAM2	452	627	151	559	756	0.000	10.43	10.62	9.21	6.48	13.52	6.26	9.80	9.55	10.64	8.59
HSD17B10	ICAM2	926	642	627	632	694	0.554	10.69	10.62	9.29	6.48	12.48	6.26	10.06	9.55	10.76	8.59
ADIPOR2	ICMT	914	146	720	660	712	0.532	11.66	10.03	11.71	10.83	12.99	10.73	12.53	10.97	11.90	12.40
CTSC	ICMT	905	524	975	947	559	0.363	12.74	10.03	6.93	10.83	10.18	10.73	12.96	10.97	9.13	12.40
C2orf74	ICT1	101	108	96	50	47	0.000	0.00	9.02	0.00	8.29	0.00	9.78	0.00	7.92	0.00	10.38
ICAM2	ICT1	617	190	854	506	748	0.114	10.62	9.02	6.48	8.29	6.26	9.78	9.55	7.92	8.59	10.38
DDIT4	ID2	709	343	914	436	308	0.314	12.21	11.61	9.42	12.08	11.29	13.81	11.26	11.89	11.50	9.04
BACH2	ID3	803	97	276	37	120	0.606	8.99	8.83	7.43	9.69	8.66	9.88	8.37	11.92	9.36	10.25
CHMP7	ID3	551	30	722	913	826	0.025	11.15	8.83	10.57	9.69	10.41	9.88	10.32	11.92	11.08	10.25
FAM102A	ID3	887	119	626	617	799	0.503	11.21	8.83	12.67	9.69	11.19	9.88	10.81	11.92	8.69	10.25
DROSHA	IDE	941	936	974	988	895	0.025	9.91	9.81	10.95	8.85	10.01	10.59	10.34	9.90	10.79	11.94
ARHGAP26	IDH1	764	626	179	50	17	0.465	13.29	10.65	11.84	9.28	9.41	13.54	11.19	10.87	10.63	9.48
CERS6	IDH1	406	658	519	637	215	0.000	8.93	10.65	8.90	9.28	8.69	13.54	8.71	10.87	9.18	9.48
CCDC12	IDH2	863	597	669	849	330	0.418	10.46	11.63	9.38	11.86	9.87	14.03	9.71	10.91	10.09	14.77
CRELD2	IDH3B	967	770	426	868	660	0.535	10.11	11.60	9.30	11.69	11.55	11.54	10.15	11.23	9.29	12.15
CTSH	IDH3B	805	136	900	789	814	0.161	12.52	11.60	10.70	11.69	11.84	11.54	13.68	11.23	9.48	12.15
GUSB	IDH3B	985	616	987	995	668	0.343	11.74	11.60	9.61	11.69	12.29	11.54	11.43	11.23	9.89	12.15
CSF1R	IDH3G	852	274	927	875	659	0.273	12.11	11.49	9.05	11.35	8.78	10.68	11.19	10.69	8.26	11.49
ANKRD10	IDNK	736	580	631	592	592	0.275	11.48	8.98	11.54	8.44	12.09	9.67	12.48	6.55	12.90	6.39
EVL	IDNK	32	535	141	754	822	0.000	12.73	8.98	13.78	8.44	12.91	9.67	12.35	6.55	10.51	6.39
CARD11	IFFO2	930	351	114	544	225	0.838	11.46	9.53	5.61	10.23	7.09	9.37	8.31	9.88	4.64	9.69
COX6A1	IFI27L2	993	735	698	943	987	0.304	11.16	9.54	12.91	9.62	12.32	6.37	11.10	8.91	8.75	6.78
COX7A2	IFI27L2	958	552	807	900	714	0.429	10.69	9.54	11.87	9.62	11.73	6.37	10.95	8.91	10.90	6.78
DDRGK1	IFI27L2	933	505	767	878	562	0.510	10.77	9.54	11.39	9.62	11.28	6.37	10.93	8.91	10.68	6.78
APLP2	IFI30	833	247	968	753	868	0.206	14.29	15.29	14.14	5.93	14.20	11.34	15.53	13.82	12.35	7.64
ASGR2	IFI30	868	75	953	608	773	0.361	10.73	15.29	4.48	5.93	14.72	11.34	5.41	13.82	3.20	7.64
CCDC149	IFI30	905	154	905	570	560	0.542	9.30	15.29	10.39	5.93	9.09	11.34	9.49	13.82	9.16	7.64
CLMN	IFI30	549	436	225	165	457	0.098	10.84	15.29	10.48	5.93	11.83	11.34	10.61	13.82	10.19	7.64
FXYD6	IFI30	840	14	772	40	435	0.544	8.59	15.29	13.22	5.93	8.56	11.34	10.69	13.82	8.78	7.64
BCL6	IFNGR2	985	467	898	843	283	0.600	15.42	12.94	11.51	9.98	12.59	10.21	13.82	11.01	14.96	9.78
CHMP2A	IFNGR2	956	863	849	881	681	0.275	12.87	12.94	11.32	9.98	11.57	10.21	11.39	11.01	11.82	9.78
FRAT2	IFNGR2	999	884	404	811	376	0.650	13.13	12.94	7.67	9.98	9.65	10.21	8.75	11.01	8.57	9.78
CCNB1IP1	IFT57	535	922	207	666	811	0.018	9.46	8.89	9.93	9.92	10.64	7.96	10.36	11.45	10.92	8.97
ARVCF	IGF1	447	248	100	41	99	0.000	8.42	5.41	10.55	5.91	10.60	11.82	9.57	9.51	9.93	9.58
CEND1	IGF1	220	660	30	201	258	0.000	4.79	5.41	13.85	5.91	3.53	11.82	2.48	9.51	3.58	9.58
GALNT9	IGF1	385	668	32	481	352	0.000	4.33	5.41	11.99	5.91	3.35	11.82	3.06	9.51	2.71	9.58
HAP1	IGF1	101	56	242	17	294	0.000	3.18	5.41	9.73	5.91	4.37	11.82	4.95	9.51	4.39	9.58
BASP1	IGF2R	898	494	836	528	188	0.614	14.45	13.66	14.01	10.20	8.06	12.57	10.34	12.97	6.68	13.99
CSF3R	IGF2R	908	584	623	841	666	0.459	18.27	13.66	7.67	10.20	10.07	12.57	13.80	12.97	8.07	13.99
ARVCF	IGFBP5	413	528	387	576	362	0.000	8.42	8.35	10.55	11.47	10.60	12.13	9.57	13.95	9.93	14.66
BIRC7	IGFBP5	101	327	96	108	47	0.000	3.02	8.35	1.92	11.47	1.21	12.13	3.52	13.95	1.53	14.66
CNGB1	IGFBP5	73	226	96	49	47	0.000	4.01	8.35	6.73	11.47	0.71	12.13	1.67	13.95	0.31	14.66
CPNE7	IGFBP5	285	173	420	267	47	0.000	5.46	8.35	10.02	11.47	5.73	12.13	5.30	13.95	1.93	14.66
FUT5	IGFBP5	101	108	127	50	47	0.000	1.45	8.35	1.05	11.47	3.51	12.13	0.64	13.95	0.51	14.66
GALNT9	IGFBP5	385	159	138	210	74	0.000	4.33	8.35	11.99	11.47	3.35	12.13	3.06	13.95	2.71	14.66
GJC2	IGFBP5	202	294	519	582	397	0.000	6.47	8.35	7.95	11.47	4.52	12.13	6.54	13.95	5.27	14.66
HAP1	IGFBP5	101	337	73	184	154	0.000	3.18	8.35	9.73	11.47	4.37	12.13	4.95	13.95	4.39	14.66
HCN2	IGFBP5	213	101	473	283	80	0.000	6.53	8.35	12.68	11.47	4.04	12.13	3.18	13.95	3.84	14.66
ABCB7	IKBKAP	982	680	959	957	869	0.232	9.66	10.26	7.83	11.72	9.72	11.26	9.15	11.03	10.74	10.87
ASB1	IKBKAP	871	854	772	957	932	0.058	10.59	10.26	11.20	11.72	10.02	11.26	10.28	11.03	11.55	10.87
ENOSF1	IKBKAP	914	361	511	822	686	0.569	8.76	10.26	8.48	11.72	11.94	11.26	10.47	11.03	9.61	10.87
ACO2	IKBKB	783	345	737	880	357	0.306	10.98	11.86	13.28	10.09	11.13	10.97	10.79	11.86	14.13	11.38
AIFM1	IKBKB	953	636	632	832	522	0.595	10.05	11.86	9.44	10.09	12.15	10.97	9.37	11.86	11.57	11.38
ANAPC1	IKBKB	925	494	966	959	813	0.269	9.84	11.86	9.97	10.09	9.78	10.97	9.80	11.86	10.50	11.38
ATP5B	IKBKB	941	321	780	843	362	0.571	13.74	11.86	14.91	10.09	14.35	10.97	14.31	11.86	15.46	11.38
BMS1	IKBKB	881	692	969	875	593	0.241	10.14	11.86	10.39	10.09	10.60	10.97	10.80	11.86	11.65	11.38
CEPT1	IKBKB	904	819	916	966	817	0.086	10.18	11.86	8.48	10.09	10.10	10.97	9.81	11.86	9.06	11.38
COQ9	IKBKB	985	772	911	887	385	0.435	9.74	11.86	10.72	10.09	11.79	10.97	9.62	11.86	12.54	11.38
DDX41	IKBKB	859	413	996	956	893	0.179	11.78	11.86	11.69	10.09	11.06	10.97	10.92	11.86	10.68	11.38
DDX56	IKBKB	963	918	972	970	771	0.118	11.45	11.86	11.12	10.09	11.79	10.97	11.39	11.86	11.28	11.38
DPH7	IKBKB	923	807	958	986	879	0.080	10.08	11.86	10.19	10.09	10.24	10.97	10.09	11.86	9.80	11.38
EDC4	IKBKB	987	665	1000	983	813	0.250	11.63	11.86	11.77	10.09	11.41	10.97	11.80	11.86	11.71	11.38
EIF2B5	IKBKB	982	714	998	995	883	0.183	10.83	11.86	11.11	10.09	11.21	10.97	11.16	11.86	11.89	11.38
FLAD1	IKBKB	986	706	977	945	863	0.227	10.40	11.86	9.31	10.09	10.31	10.97	9.53	11.86	10.42	11.38
GFM2	IKBKB	916	417	734	879	577	0.487	9.05	11.86	9.73	10.09	10.18	10.97	8.62	11.86	10.35	11.38
HEATR1	IKBKB	927	810	887	739	437	0.386	9.40	11.86	8.59	10.09	9.47	10.97	9.81	11.86	10.08	11.38
ABCF2	IKBKE	994	357	824	791	371	0.680	10.66	10.77	11.35	5.34	10.03	6.65	10.65	7.75	12.40	5.01
BCS1L	IKBKE	953	401	675	853	740	0.522	9.46	10.77	9.45	5.34	10.80	6.65	9.36	7.75	10.13	5.01
C16orf13	IKBKE	881	317	585	805	485	0.567	10.28	10.77	11.15	5.34	10.34	6.65	9.75	7.75	10.40	5.01
CPSF3L	IKBKE	972	570	866	797	551	0.552	11.85	10.77	11.90	5.34	11.87	6.65	11.95	7.75	12.27	5.01
DHPS	IKBKE	956	422	829	685	469	0.655	11.03	10.77	10.94	5.34	10.69	6.65	10.54	7.75	11.51	5.01
FARSA	IKBKE	963	248	790	903	604	0.527	10.63	10.77	11.62	5.34	10.82	6.65	9.94	7.75	11.16	5.01
ANKRD17	IKZF1	1000	249	728	768	559	0.723	11.01	12.91	12.06	4.65	11.84	7.92	12.00	10.14	12.31	6.36
APPL1	IKZF1	981	386	599	715	487	0.805	9.96	12.91	10.33	4.65	10.07	7.92	10.53	10.14	11.71	6.36
ATRX	IKZF1	982	315	819	816	572	0.611	10.64	12.91	11.27	4.65	10.41	7.92	11.45	10.14	11.63	6.36
EXOC4	IKZF1	948	239	748	668	385	0.688	10.81	12.91	11.02	4.65	10.18	7.92	10.71	10.14	11.78	6.36
CAPN2	IL10RA	999	453	868	482	765	0.681	12.44	13.01	12.38	6.73	11.25	8.99	14.65	11.33	12.91	7.68
HNRNPDL	IL11RA	966	844	76	608	113	0.706	12.18	10.19	13.47	9.85	12.84	11.03	14.00	9.90	13.60	9.78
IDH2	IL12RB1	967	536	613	761	89	0.729	11.63	10.74	11.86	4.22	14.03	5.87	10.91	7.13	14.77	3.71
CKAP4	IL13RA1	936	344	950	789	907	0.306	12.66	12.26	9.58	8.64	10.97	12.92	11.53	12.22	10.05	11.50
FAM49A	IL13RA1	999	174	729	861	668	0.619	12.02	12.26	12.15	8.64	7.72	12.92	10.32	12.22	9.68	11.50
ACSS2	IL17RA	977	801	66	835	358	0.636	11.19	13.86	10.40	8.86	12.50	10.17	12.02	11.36	12.83	8.63
ANO10	IL17RA	949	632	976	782	761	0.336	11.23	13.86	9.52	8.86	8.98	10.17	9.80	11.36	9.44	8.63
C6orf89	IL17RA	993	677	987	917	911	0.240	11.83	13.86	12.21	8.86	11.94	10.17	12.07	11.36	12.15	8.63
CAMKK2	IL17RA	1000	108	721	823	915	0.520	13.08	13.86	14.10	8.86	11.70	10.17	11.53	11.36	10.02	8.63
FGD4	IL17RA	790	753	42	740	502	0.333	11.46	13.86	9.14	8.86	10.75	10.17	10.76	11.36	10.84	8.63
BRI3	IL1RN	887	427	55	165	417	0.774	12.91	12.65	10.15	2.97	11.99	12.03	12.37	8.35	12.16	4.78
CYSTM1	IL1RN	882	424	433	569	305	0.730	13.01	12.65	10.56	2.97	10.17	12.03	11.46	8.35	12.44	4.78
GABARAP	IL1RN	915	249	433	317	609	0.775	14.91	12.65	13.39	2.97	13.23	12.03	13.52	8.35	13.48	4.78
IFIT3	IL1RN	479	441	2	437	464	0.000	10.78	12.65	9.49	2.97	9.16	12.03	10.26	8.35	8.21	4.78
ARHGEF37	IL34	165	23	639	611	182	0.000	7.59	4.31	10.09	9.05	7.97	6.39	8.61	6.97	10.94	8.13
HACL1	ILKAP	973	909	471	883	963	0.319	9.30	10.33	8.37	9.75	10.53	10.12	8.44	9.81	9.80	10.62
ACSS1	IMMT	982	59	638	712	521	0.778	11.00	11.31	12.16	11.52	9.81	11.85	11.33	11.27	11.58	13.18
DCP1B	IMMT	970	969	390	937	465	0.487	8.90	11.31	7.35	11.52	8.68	11.85	8.21	11.27	9.08	13.18
GUSB	IMMT	974	580	973	971	399	0.436	11.74	11.31	9.61	11.52	12.29	11.85	11.43	11.27	9.89	13.18
IKBKB	IMMT	925	445	889	912	547	0.426	11.86	11.31	10.09	11.52	10.97	11.85	11.86	11.27	11.38	13.18
ARMCX6	IMP3	895	565	814	813	762	0.313	10.06	9.89	8.80	10.11	8.88	10.89	9.48	9.50	8.50	10.50
BIN1	IMP3	723	682	722	826	921	0.021	11.42	9.89	13.38	10.11	10.84	10.89	10.41	9.50	15.53	10.50
DUS1L	IMP3	942	924	837	860	972	0.102	11.60	9.89	11.18	10.11	12.67	10.89	11.67	9.50	12.05	10.50
ICAM2	IMP3	717	162	783	605	582	0.232	10.62	9.89	6.48	10.11	6.26	10.89	9.55	9.50	8.59	10.50
ARMCX6	IMP4	984	513	778	698	375	0.724	10.06	10.09	8.80	10.37	8.88	10.89	9.48	9.65	8.50	11.05
BST2	IMP4	945	144	582	180	682	0.758	11.68	10.09	9.06	10.37	12.22	10.89	11.65	9.65	9.64	11.05
GUSB	IMP4	947	395	932	853	862	0.321	11.74	10.09	9.61	10.37	12.29	10.89	11.43	9.65	9.89	11.05
EVL	IMPDH2	977	762	230	266	177	0.823	12.73	11.18	13.78	10.71	12.91	11.16	12.35	12.01	10.51	12.98
HMCES	IMPDH2	987	881	750	739	763	0.407	10.72	11.18	11.10	10.71	10.93	11.16	10.31	12.01	11.26	12.98
ATP6V0B	ING1	549	912	330	511	934	0.043	13.65	10.59	12.20	8.50	12.06	9.47	12.02	8.94	11.51	8.97
CCM2	ING4	1000	809	580	757	959	0.448	12.49	10.56	12.30	10.57	11.97	9.87	10.62	9.51	10.95	9.61
HSPA9	INO80	985	811	981	963	979	0.103	11.52	10.36	13.42	9.87	14.02	10.32	12.94	10.67	14.31	11.27
AFG3L1P	INPP4A	988	406	737	888	978	0.424	9.68	11.92	9.63	11.78	10.10	9.51	9.80	10.66	9.89	10.23
GAB2	INPP5A	938	222	771	879	374	0.551	12.95	10.68	11.48	10.60	8.53	9.64	11.88	10.72	9.64	11.56
GBA2	INPP5D	972	252	720	586	685	0.699	12.01	14.00	12.68	9.07	12.25	9.11	12.45	11.41	12.42	8.78
HDLBP	INPP5D	832	437	602	286	593	0.567	12.82	14.00	13.18	9.07	14.34	9.11	14.31	11.41	14.73	8.78
CLCN5	INSR	710	860	97	780	305	0.210	8.63	9.56	7.53	10.75	11.16	12.92	9.39	10.68	9.81	12.17
CYFIP1	INSR	774	719	875	698	803	0.066	10.70	9.56	11.11	10.75	11.36	12.92	12.58	10.68	11.04	12.17
GALNS	INTS3	971	942	962	917	952	0.056	11.09	12.22	9.19	12.46	9.83	12.16	9.92	12.57	8.82	11.39
GIT2	INTS3	955	968	972	940	993	0.007	12.43	12.22	11.20	12.46	10.65	12.16	11.16	12.57	10.79	11.39
ARFGEF1	INTS6	992	975	877	890	945	0.141	11.47	10.62	10.60	8.82	10.76	10.53	11.19	9.51	11.13	9.57
ATP6V1C1	INTS6	807	865	869	647	950	0.080	11.80	10.62	12.62	8.82	10.85	10.53	11.04	9.51	10.35	9.57
FBXO38	INTS6	903	950	610	307	957	0.348	11.36	10.62	9.64	8.82	10.37	10.53	10.48	9.51	10.98	9.57
AIMP2	INTS9	959	856	855	968	932	0.117	8.43	9.70	6.79	8.06	8.54	8.15	7.07	8.85	10.85	9.43
GPATCH4	INTS9	983	727	876	883	988	0.232	9.39	9.70	10.09	8.06	9.77	8.15	9.35	8.85	11.51	9.43
C14orf169	IPO5	101	108	96	50	47	0.000	0.00	10.70	0.00	12.56	0.00	12.00	0.00	12.36	0.00	13.73
DDB2	IPO9	995	509	855	618	913	0.542	10.32	10.68	7.40	11.90	10.00	11.20	9.68	11.57	8.87	11.23
GSDMB	IPO9	902	268	20	61	658	0.725	10.14	10.68	8.91	11.90	11.43	11.20	8.82	11.57	7.32	11.23
INTS10	IPO9	891	963	993	972	913	0.000	10.63	10.68	10.69	11.90	11.60	11.20	10.85	11.57	10.45	11.23
CBR4	IQCB1	803	971	166	858	788	0.159	9.23	9.77	9.36	8.95	11.24	8.98	8.78	9.54	10.01	9.50
CEPT1	IQCB1	924	959	722	949	977	0.101	10.18	9.77	8.48	8.95	10.10	8.98	9.81	9.54	9.06	9.50
IFIT1	IRF1	546	234	144	111	164	0.092	8.64	13.53	10.43	7.28	9.14	10.83	8.62	12.21	8.31	9.28
FIG4	IRF5	845	499	930	965	440	0.345	10.65	11.37	10.34	6.65	8.52	8.62	9.46	9.75	9.66	6.39
BASP1	IRS2	891	865	314	53	187	0.600	14.45	11.08	14.01	11.60	8.06	11.75	10.34	11.02	6.68	11.60
CPD	IRS2	970	907	303	466	812	0.581	13.16	11.08	10.70	11.60	12.03	11.75	12.42	11.02	10.88	11.60
CRISPLD2	IRS2	969	320	397	327	645	0.866	12.06	11.08	7.70	11.60	9.54	11.75	13.48	11.02	10.43	11.60
CCDC101	ISYNA1	858	505	592	256	588	0.624	10.35	10.01	7.52	10.03	9.26	9.53	8.58	10.11	10.29	9.46
ARID2	ITCH	999	939	980	999	1000	0.040	10.18	11.74	8.66	10.54	9.41	11.89	10.15	11.20	10.06	11.28
ANK3	ITGA6	963	7	480	407	352	0.926	7.81	9.80	12.43	10.03	9.32	9.60	9.27	11.64	11.64	10.73
CLUAP1	ITGA6	963	299	925	680	641	0.553	8.44	9.80	9.88	10.03	8.26	9.60	8.83	11.64	9.37	10.73
CNST	ITGA6	978	202	403	704	144	0.854	9.99	9.80	10.65	10.03	10.68	9.60	10.31	11.64	11.69	10.73
FAM134B	ITGA6	895	130	121	395	222	0.790	8.58	9.80	10.14	10.03	10.10	9.60	8.97	11.64	13.00	10.73
FOXP1	ITGA6	822	387	424	713	544	0.515	11.49	9.80	10.43	10.03	10.41	9.60	11.61	11.64	9.99	10.73
IKZF1	ITGA6	888	650	589	304	712	0.550	12.91	9.80	4.65	10.03	7.92	9.60	10.14	11.64	6.36	10.73
ALKBH3	ITGB3BP	647	529	824	909	853	0.059	8.98	7.77	8.26	6.81	8.81	7.29	8.25	7.33	9.93	7.72
DES	ITGB4	323	308	560	364	408	0.000	9.74	8.22	7.62	10.83	8.60	7.72	13.06	10.33	18.27	8.99
EMC3	ITGB5	550	122	943	696	940	0.025	12.01	9.80	10.63	10.23	10.85	12.45	10.46	12.66	12.37	11.23
ESAM	ITGB5	997	842	836	784	728	0.399	9.49	9.80	9.85	10.23	9.21	12.45	13.19	12.66	10.52	11.23
GNAZ	ITGB5	934	15	915	663	823	0.417	8.47	9.80	11.65	10.23	4.83	12.45	5.87	12.66	7.02	11.23
ECI1	ITGB7	691	529	693	163	450	0.272	9.79	11.72	9.72	4.64	12.27	8.41	9.65	7.94	11.95	5.52
IRF3	ITGB7	948	468	353	754	873	0.583	11.99	11.72	10.21	4.64	11.49	8.41	11.61	7.94	9.84	5.52
ANKRD46	ITM2A	783	495	279	795	692	0.329	7.77	10.23	10.73	10.60	10.25	6.28	8.45	10.30	10.73	9.71
ATMIN	ITM2A	692	565	649	380	626	0.214	9.96	10.23	11.54	10.60	10.71	6.28	10.19	10.30	11.26	9.71
ATP5L	ITM2A	574	497	844	492	823	0.074	11.23	10.23	11.58	10.60	11.61	6.28	11.14	10.30	12.13	9.71
C14orf166	ITM2A	733	441	847	449	602	0.298	10.90	10.23	10.51	10.60	11.10	6.28	11.25	10.30	12.09	9.71
C1QBP	ITM2A	869	448	705	71	690	0.540	10.41	10.23	10.78	10.60	11.31	6.28	10.25	10.30	11.65	9.71
CCT2	ITM2A	856	384	805	282	210	0.559	10.71	10.23	11.58	10.60	11.20	6.28	11.54	10.30	12.17	9.71
CNOT7	ITM2A	713	483	848	694	773	0.116	10.63	10.23	10.47	10.60	10.57	6.28	10.28	10.30	11.47	9.71
COX7A2L	ITM2A	588	419	569	470	727	0.098	11.06	10.23	11.43	10.60	11.41	6.28	10.79	10.30	10.88	9.71
EEF1B2	ITM2A	877	313	663	270	710	0.568	11.53	10.23	12.04	10.60	12.86	6.28	13.01	10.30	13.65	9.71
FAM134B	ITM2A	628	406	65	245	174	0.256	8.58	10.23	10.14	10.60	10.10	6.28	8.97	10.30	13.00	9.71
FAU	ITM2A	824	296	574	489	594	0.564	13.29	10.23	12.54	10.60	13.32	6.28	13.37	10.30	13.35	9.71
FBL	ITM2A	978	245	690	362	338	0.861	11.57	10.23	9.99	10.60	10.79	6.28	11.15	10.30	11.32	9.71
GNPNAT1	ITM2A	764	336	668	189	165	0.444	7.19	10.23	6.79	10.60	10.26	6.28	7.43	10.30	8.76	9.71
GRPEL2	ITM2A	764	358	672	615	530	0.369	8.23	10.23	8.44	10.60	8.79	6.28	9.78	10.30	9.24	9.71
IPO5	ITM2A	974	444	830	481	317	0.783	10.70	10.23	12.56	10.60	12.00	6.28	12.36	10.30	13.73	9.71
CPEB2	ITPRIP	841	278	120	407	221	0.682	9.89	13.16	10.36	7.01	10.48	9.05	10.01	11.97	9.92	9.71
IRS2	JAG1	850	588	139	260	308	0.656	11.08	8.20	11.60	9.19	11.75	9.31	11.02	12.08	11.60	10.40
ICAM2	JAGN1	482	419	814	675	328	0.000	10.62	10.16	6.48	8.91	6.26	10.60	9.55	9.38	8.59	10.39
ABCC3	JAM3	794	578	304	53	924	0.402	10.18	8.47	5.37	10.95	14.13	7.93	11.09	11.29	5.97	9.16
DMTN	JAM3	114	174	407	589	275	0.000	13.62	8.47	14.72	10.95	10.36	7.93	9.94	11.29	11.31	9.16
GNAZ	JAM3	849	481	771	628	702	0.398	8.47	8.47	11.65	10.95	4.83	7.93	5.87	11.29	7.02	9.16
GP9	JAM3	603	108	96	189	47	0.206	9.83	8.47	0.70	10.95	2.13	7.93	4.51	11.29	1.50	9.16
ABHD5	JDP2	910	498	508	815	468	0.658	12.21	11.75	6.91	9.82	8.93	9.63	9.32	11.05	9.30	9.88
ATP6V0B	JDP2	978	825	606	738	891	0.426	13.65	11.75	12.20	9.82	12.06	9.63	12.02	11.05	11.51	9.88
BEST1	JDP2	717	70	740	219	632	0.260	12.24	11.75	9.62	9.82	7.77	9.63	10.03	11.05	7.30	9.88
BRI3	JDP2	910	741	791	853	823	0.216	12.91	11.75	10.15	9.82	11.99	9.63	12.37	11.05	12.16	9.88
C19orf59	JDP2	930	414	284	455	191	0.860	13.16	11.75	2.26	9.82	4.81	9.63	10.23	11.05	3.80	9.88
IRS2	JDP2	966	812	245	881	408	0.586	11.08	11.75	11.60	9.82	11.75	9.63	11.02	11.05	11.60	9.88
ANKRD46	JRKL	981	907	883	984	724	0.214	7.77	7.77	10.73	7.26	10.25	8.17	8.45	8.07	10.73	8.48
GMFG	JTB	967	495	762	893	872	0.420	13.33	12.47	6.14	11.73	8.21	12.65	10.84	12.02	7.39	12.04
CHRNB2	KANK2	9	2	626	158	168	0.000	4.72	8.98	10.87	9.99	3.02	11.88	1.84	13.70	2.52	11.73
BST2	KARS	953	462	688	448	747	0.689	11.68	11.87	9.06	11.14	12.22	11.48	11.65	11.72	9.64	13.15
ATP6AP1	KAT8	895	876	773	958	884	0.076	13.29	11.63	13.19	10.68	11.67	10.32	13.09	10.53	11.37	10.99
GUSB	KATNB1	846	367	926	914	902	0.173	11.74	10.87	9.61	11.57	12.29	8.95	11.43	9.44	9.89	9.22
ACADVL	KCNAB2	947	183	343	697	126	0.795	13.09	13.55	13.51	14.97	15.55	9.54	14.35	11.86	15.05	9.59
COL1A1	KCNIP3	0	37	534	621	659	0.000	8.40	3.26	6.87	11.83	11.90	6.96	14.71	6.56	10.66	6.83
B4GALT5	KCNJ2	979	353	582	545	144	0.894	12.86	10.60	10.64	7.09	11.05	5.34	11.83	7.23	12.62	8.43
C16orf72	KCNJ2	988	519	606	657	216	0.835	12.14	10.60	9.89	7.09	10.72	5.34	10.83	7.23	11.51	8.43
FRAT2	KCNJ2	987	534	149	837	455	0.788	13.13	10.60	7.67	7.09	9.65	5.34	8.75	7.23	8.57	8.43
FOXP2	KCNJ5	0	684	72	262	249	0.000	2.74	3.30	6.69	4.25	8.17	3.09	6.78	6.52	8.87	3.96
CKAP4	KCNQ1	920	347	906	666	789	0.409	12.66	10.85	9.58	4.21	10.97	6.07	11.53	9.49	10.05	6.01
BMS1	KDM2B	999	966	570	834	575	0.525	10.14	10.47	10.39	10.00	10.60	9.96	10.80	9.99	11.65	9.62
EHBP1	KDM4C	993	762	699	985	995	0.267	8.41	10.56	11.16	9.65	11.25	9.97	9.69	10.11	9.81	9.86
IPO9	KDM4C	974	797	951	993	995	0.100	10.68	10.56	11.90	9.65	11.20	9.97	11.57	10.11	11.23	9.86
C12orf65	KDSR	986	659	600	941	766	0.489	8.73	9.50	8.98	10.50	9.31	11.73	8.57	11.01	9.26	10.02
CERS6	KDSR	940	502	944	932	613	0.387	8.93	9.50	8.90	10.50	8.69	11.73	8.71	11.01	9.18	10.02
DLAT	KDSR	981	649	929	933	66	0.457	8.98	9.50	10.09	10.50	9.91	11.73	9.56	11.01	12.09	10.02
FAM220A	KDSR	949	565	867	920	121	0.472	9.04	9.50	9.82	10.50	8.24	11.73	8.00	11.01	11.55	10.02
COPB2	KEAP1	915	881	910	976	977	0.019	11.92	10.81	10.95	11.20	12.19	11.48	12.17	10.67	11.14	13.07
ACAT1	KIAA0020	956	749	683	689	30	0.602	9.64	8.96	10.70	7.15	14.36	9.72	10.77	9.89	13.55	9.38
ANAPC4	KIAA0020	937	854	769	542	877	0.353	9.72	8.96	9.88	7.15	9.86	9.72	9.99	9.89	9.93	9.38
ANGEL2	KIAA0020	927	784	550	529	922	0.462	9.56	8.96	10.17	7.15	9.92	9.72	9.96	9.89	10.10	9.38
ANKMY2	KIAA0020	980	797	214	416	12	0.811	8.70	8.96	10.40	7.15	9.01	9.72	8.93	9.89	9.78	9.38
ARV1	KIAA0020	843	796	802	723	567	0.242	8.14	8.96	9.18	7.15	9.12	9.72	8.04	9.89	9.13	9.38
CCDC132	KIAA0020	965	788	762	636	689	0.492	9.03	8.96	10.28	7.15	9.11	9.72	9.04	9.89	10.08	9.38
CEP57	KIAA0020	985	866	797	312	409	0.638	9.93	8.96	9.74	7.15	11.21	9.72	10.19	9.89	9.85	9.38
DCUN1D4	KIAA0020	973	890	242	410	910	0.546	8.93	8.96	10.70	7.15	11.59	9.72	10.45	9.89	10.59	9.38
ECHDC1	KIAA0020	741	835	794	859	602	0.070	10.50	8.96	10.19	7.15	11.26	9.72	10.97	9.89	10.67	9.38
HACL1	KIAA0020	970	810	652	741	831	0.423	9.30	8.96	8.37	7.15	10.53	9.72	8.44	9.89	9.80	9.38
HELQ	KIAA0020	959	898	821	521	837	0.380	9.02	8.96	7.48	7.15	8.88	9.72	8.21	9.89	9.61	9.38
C10orf54	KIAA0319L	971	75	830	895	770	0.445	16.77	12.29	10.76	12.02	9.18	12.04	12.82	11.82	10.07	11.99
CSF3R	KIAA0319L	968	304	534	615	489	0.862	18.27	12.29	7.67	12.02	10.07	12.04	13.80	11.82	8.07	11.99
FKBP15	KIAA0319L	951	915	953	920	995	0.034	12.58	12.29	10.52	12.02	10.83	12.04	11.80	11.82	10.90	11.99
GLIPR2	KIAA0319L	979	352	731	680	529	0.738	13.44	12.29	8.00	12.02	7.51	12.04	11.39	11.82	8.06	11.99
IL17RA	KIAA0319L	983	569	986	885	690	0.403	13.86	12.29	8.86	12.02	10.17	12.04	11.36	11.82	8.63	11.99
CHMP7	KIAA0355	823	544	919	671	861	0.215	11.15	9.65	10.57	9.62	10.41	10.21	10.32	11.23	11.08	11.25
AKAP7	KIAA0391	562	847	583	893	712	0.000	8.02	10.32	9.16	8.97	10.03	9.67	7.63	9.33	9.26	9.70
ANKRD46	KIAA0391	907	779	454	723	755	0.435	7.77	10.32	10.73	8.97	10.25	9.67	8.45	9.33	10.73	9.70
CAND1	KIAA0391	954	852	992	949	770	0.145	10.66	10.32	11.94	8.97	11.56	9.67	11.81	9.33	10.79	9.70
CREBL2	KIAA0391	817	843	972	814	783	0.018	10.34	10.32	11.30	8.97	11.21	9.67	10.87	9.33	9.68	9.70
GOLPH3L	KIAA0391	922	845	698	967	798	0.212	9.38	10.32	8.53	8.97	9.18	9.67	9.15	9.33	9.65	9.70
ACSS2	KIAA0513	964	482	26	930	183	0.713	11.19	12.27	10.40	14.34	12.50	8.35	12.02	10.24	12.83	10.70
ARAP3	KIAA0513	967	284	815	489	219	0.776	12.08	12.27	9.57	14.34	8.91	8.35	11.99	10.24	9.57	10.70
CSF1R	KIAA0513	75	154	925	857	323	0.000	12.11	12.27	9.05	14.34	8.78	8.35	11.19	10.24	8.26	10.70
FCER1G	KIAA0513	937	15	961	674	588	0.524	14.99	12.27	5.78	14.34	8.80	8.35	11.95	10.24	7.30	10.70
DZIP3	KIAA0586	885	975	316	913	777	0.246	8.54	9.09	11.43	7.97	8.44	8.81	8.85	8.30	9.96	9.24
ANAPC1	KIAA0907	952	890	373	757	856	0.403	9.84	10.82	9.97	11.02	9.78	11.35	9.80	11.89	10.50	11.47
DDX1	KIAA0907	871	804	110	307	816	0.432	10.15	10.82	12.02	11.02	11.34	11.35	11.33	11.89	12.94	11.47
ALDH3B1	KIAA0930	989	596	688	739	466	0.717	11.94	12.66	5.99	14.04	7.87	11.54	11.59	11.15	7.26	11.37
ARRB1	KIAA0930	718	380	463	784	305	0.327	11.24	12.66	11.27	14.04	8.65	11.54	11.25	11.15	8.61	11.37
ARSD	KIAA0930	989	276	153	811	469	0.823	10.03	12.66	7.62	14.04	11.49	11.54	9.70	11.15	7.24	11.37
ASH2L	KIAA0930	992	524	681	937	692	0.567	10.96	12.66	10.73	14.04	10.02	11.54	9.82	11.15	11.01	11.37
C10orf11	KIAA0930	640	343	53	706	422	0.210	7.98	12.66	4.39	14.04	7.66	11.54	6.46	11.15	6.24	11.37
COMMD9	KIAA0930	919	574	917	983	707	0.280	10.97	12.66	10.29	14.04	9.99	11.54	9.44	11.15	10.47	11.37
CRTAP	KIAA0930	571	864	452	734	859	0.035	11.97	12.66	11.89	14.04	11.42	11.54	13.19	11.15	12.17	11.37
DHRS7B	KIAA0930	1000	453	800	943	434	0.628	9.86	12.66	8.81	14.04	8.99	11.54	8.94	11.15	10.16	11.37
DPYSL2	KIAA0930	735	703	778	717	594	0.096	10.47	12.66	15.09	14.04	10.17	11.54	13.73	11.15	10.69	11.37
FUCA1	KIAA0930	881	354	461	894	378	0.572	10.15	12.66	7.78	14.04	10.81	11.54	9.98	11.15	9.16	11.37
FUCA2	KIAA0930	809	717	903	980	605	0.148	9.99	12.66	8.10	14.04	10.52	11.54	10.18	11.15	8.32	11.37
FXYD6	KIAA0930	849	366	436	276	557	0.669	8.59	12.66	13.22	14.04	8.56	11.54	10.69	11.15	8.78	11.37
GNS	KIAA0930	973	553	864	920	696	0.429	13.48	12.66	10.62	14.04	11.77	11.54	13.23	11.15	11.76	11.37
KCTD12	KIAA0930	960	146	487	757	437	0.791	11.50	12.66	10.38	14.04	8.50	11.54	12.91	11.15	10.85	11.37
CEP57	KIAA1147	977	844	489	943	950	0.336	9.93	9.94	9.74	11.56	11.21	11.46	10.19	11.50	9.85	10.07
CHMP7	KIAA1147	835	846	930	601	796	0.137	11.15	9.94	10.57	11.56	10.41	11.46	10.32	11.50	11.08	10.07
CNST	KIAA1147	988	701	664	848	614	0.562	9.99	9.94	10.65	11.56	10.68	11.46	10.31	11.50	11.69	10.07
DDX50	KIAA1147	920	863	902	649	808	0.229	10.08	9.94	9.57	11.56	9.49	11.46	9.97	11.50	10.37	10.07
DKC1	KIAA1147	978	916	804	238	679	0.506	10.24	9.94	9.41	11.56	10.22	11.46	10.14	11.50	10.86	10.07
EIF4B	KIAA1147	983	919	913	835	815	0.225	13.00	9.94	12.27	11.56	12.64	11.46	13.41	11.50	14.46	10.07
FOXP1	KIAA1147	827	700	311	946	783	0.249	11.49	9.94	10.43	11.56	10.41	11.46	11.61	11.50	9.99	10.07
HELQ	KIAA1147	883	890	828	717	936	0.111	9.02	9.94	7.48	11.56	8.88	11.46	8.21	11.50	9.61	10.07
ARMCX6	KIAA1191	941	535	563	830	442	0.668	10.06	10.68	8.80	12.24	8.88	11.87	9.48	11.53	8.50	11.73
C2orf68	KIAA1279	974	334	911	847	836	0.401	11.17	8.46	7.94	10.98	10.05	8.85	9.94	9.20	11.06	10.85
C12orf57	KIAA1430	808	319	839	762	367	0.331	9.49	8.88	9.98	8.99	9.90	10.43	9.87	10.08	9.69	9.73
C14orf1	KIAA1430	913	790	377	856	804	0.351	9.34	8.88	10.11	8.99	11.73	10.43	10.12	10.08	9.19	9.73
AFG3L1P	KIAA1468	950	764	760	978	970	0.188	9.68	10.36	9.63	10.60	10.10	10.06	9.80	10.56	9.89	10.08
ASAH1	KIF13A	994	625	876	605	837	0.516	13.59	11.00	11.48	10.69	11.36	10.62	13.46	11.54	11.86	12.65
ASAP1	KIF13A	959	432	827	810	423	0.600	12.51	11.00	11.04	10.69	9.80	10.62	12.25	11.54	10.57	12.65
CEBPD	KIF13A	952	152	243	484	40	0.904	13.21	11.00	9.66	10.69	13.12	10.62	13.24	11.54	12.06	12.65
CRISPLD2	KIF13A	975	230	404	298	48	0.950	12.06	11.00	7.70	10.69	9.54	10.62	13.48	11.54	10.43	12.65
CSF3R	KIF13A	981	486	417	179	52	0.962	18.27	11.00	7.67	10.69	10.07	10.62	13.80	11.54	8.07	12.65
ENTPD1	KIF13A	999	809	904	808	715	0.380	12.63	11.00	10.25	10.69	9.37	10.62	11.59	11.54	9.95	12.65
ETV6	KIF13A	927	252	667	494	245	0.770	12.27	11.00	8.78	10.69	10.00	10.62	11.12	11.54	9.53	12.65
FAM49A	KIF13A	997	168	744	845	593	0.653	12.02	11.00	12.15	10.69	7.72	10.62	10.32	11.54	9.68	12.65
FRAT2	KIF13A	955	362	686	479	328	0.817	13.13	11.00	7.67	10.69	9.65	10.62	8.75	11.54	8.57	12.65
GAS7	KIF13A	959	359	751	543	599	0.722	13.36	11.00	14.35	10.69	7.49	10.62	11.95	11.54	9.20	12.65
IFNGR2	KIF13A	989	210	828	533	628	0.734	12.94	11.00	9.98	10.69	10.21	10.62	11.01	11.54	9.78	12.65
IL17RA	KIF13A	993	778	919	442	114	0.637	13.86	11.00	8.86	10.69	10.17	10.62	11.36	11.54	8.63	12.65
KIAA0513	KIF13A	976	98	783	686	171	0.718	12.27	11.00	14.34	10.69	8.35	10.62	10.24	11.54	10.70	12.65
ARHGEF37	KIF1A	126	389	150	145	228	0.000	7.59	5.85	10.09	17.27	7.97	5.11	8.61	3.69	10.94	5.67
COL1A1	KIF1A	179	27	45	104	349	0.000	8.40	5.85	6.87	17.27	11.90	5.11	14.71	3.69	10.66	5.67
ARHGAP26	KIF1B	980	803	586	885	504	0.571	13.29	11.81	11.84	14.55	9.41	11.45	11.19	11.55	10.63	14.58
ASAP1	KIF1B	924	834	839	968	486	0.299	12.51	11.81	11.04	14.55	9.80	11.45	12.25	11.55	10.57	14.58
B4GALT5	KIF1B	994	765	913	851	483	0.473	12.86	11.81	10.64	14.55	11.05	11.45	11.83	11.55	12.62	14.58
CPD	KIF1B	970	837	969	831	767	0.238	13.16	11.81	10.70	14.55	12.03	11.45	12.42	11.55	10.88	14.58
GAS7	KIF1B	980	818	802	742	138	0.529	13.36	11.81	14.35	14.55	7.49	11.45	11.95	11.55	9.20	14.58
IL17RA	KIF1B	997	692	992	758	342	0.523	13.86	11.81	8.86	14.55	10.17	11.45	11.36	11.55	8.63	14.58
GIT2	KIF3B	840	770	867	922	996	0.035	12.43	9.67	11.20	12.32	10.65	11.30	11.16	10.88	10.79	9.30
ETS1	KLF12	1000	469	426	805	621	0.787	12.49	9.43	9.08	9.60	10.77	10.47	13.32	9.14	10.72	9.84
GNB2	KLF6	590	812	644	670	899	0.000	14.46	13.71	12.56	10.35	12.63	12.45	13.27	14.17	12.26	12.85
CRY1	KLHDC2	751	726	250	166	598	0.340	8.67	10.24	8.78	11.19	9.57	11.89	10.24	10.48	9.77	11.83
ADA	KLHDC4	1000	502	850	486	664	0.742	10.05	10.04	6.77	8.59	7.50	9.30	8.07	8.68	8.35	9.06
ANAPC1	KLHL3	974	931	508	450	713	0.622	9.84	7.68	9.97	10.45	9.78	8.42	9.80	8.60	10.50	8.48
ITGA6	KLHL3	985	7	646	491	739	0.777	9.80	7.68	10.03	10.45	9.60	8.42	11.64	8.60	10.73	8.48
ACAP2	KLHL8	995	805	964	982	785	0.222	12.24	10.38	10.03	8.27	10.04	9.45	11.14	8.66	9.89	10.75
ADAM10	KLHL8	987	875	895	973	973	0.116	11.89	10.38	10.30	8.27	10.77	9.45	11.48	8.66	10.18	10.75
ARHGAP26	KLHL8	937	990	613	646	758	0.397	13.29	10.38	11.84	8.27	9.41	9.45	11.19	8.66	10.63	10.75
CDK19	KLHL8	960	707	822	899	785	0.314	10.50	10.38	10.88	8.27	9.21	9.45	9.32	8.66	9.20	10.75
FKBP5	KLHL8	1000	220	322	576	664	0.880	13.98	10.38	9.97	8.27	12.56	9.45	13.38	8.66	15.07	10.75
FNDC3B	KLHL8	859	701	835	829	995	0.106	11.71	10.38	7.58	8.27	11.99	9.45	12.19	8.66	11.58	10.75
IQGAP1	KLHL8	932	190	717	578	509	0.712	14.25	10.38	10.93	8.27	10.17	9.45	13.94	8.66	12.39	10.75
KCTD12	KLHL8	997	674	494	875	482	0.720	11.50	10.38	10.38	8.27	8.50	9.45	12.91	8.66	10.85	10.75
CCSER2	KMT2A	1000	948	849	910	847	0.223	10.75	10.96	11.41	12.07	10.15	11.12	11.24	12.14	12.40	11.39
DKC1	KMT2A	899	971	429	135	834	0.431	10.24	10.96	9.41	12.07	10.22	11.12	10.14	12.14	10.86	11.39
DENND3	KMT2B	962	656	877	844	960	0.256	14.35	12.63	11.74	11.65	9.20	11.94	13.24	12.34	10.45	11.97
INPP5D	KMT2B	989	274	701	692	611	0.726	14.00	12.63	9.07	11.65	9.11	11.94	11.41	12.34	8.78	11.97
ANGPTL4	KREMEN1	1	550	312	453	25	0.000	6.89	11.70	9.56	10.47	12.55	8.22	9.98	10.86	9.43	11.27
GAS5	KRR1	780	573	554	708	506	0.390	10.47	8.27	10.44	8.28	11.25	9.20	12.07	8.76	10.80	10.15
EBP	KRTCAP2	864	658	507	945	877	0.281	10.24	11.18	9.07	9.93	13.01	11.37	9.78	10.95	8.05	10.68
CCBL2	KTN1	887	558	961	897	834	0.191	10.32	10.58	9.10	12.31	9.55	12.31	9.33	12.91	8.74	14.34
JAG1	LACTB	861	744	306	539	277	0.581	8.20	10.46	9.19	7.31	9.31	10.47	12.08	9.59	10.40	10.98
ANAPC16	LAGE3	684	432	917	936	755	0.092	11.73	8.82	10.38	9.83	11.96	8.59	11.58	7.28	12.64	8.96
CD99L2	LAIR1	888	114	824	688	466	0.520	10.94	12.34	13.69	5.85	12.11	7.48	11.39	11.06	13.52	6.67
EXOSC4	LAIR1	802	155	804	890	639	0.233	10.59	12.34	7.95	5.85	8.96	7.48	7.52	11.06	8.42	6.67
ATP6V0B	LAMP2	988	341	925	957	754	0.408	13.65	13.34	12.20	11.78	12.06	12.69	12.02	12.37	11.51	12.70
B4GALT5	LAMP2	994	459	893	810	767	0.503	12.86	13.34	10.64	11.78	11.05	12.69	11.83	12.37	12.62	12.70
C10orf54	LAMP2	965	438	920	852	601	0.493	16.77	13.34	10.76	11.78	9.18	12.69	12.82	12.37	10.07	12.70
CHST15	LAMP2	984	369	635	846	219	0.728	13.55	13.34	10.43	11.78	10.27	12.69	11.18	12.37	10.36	12.70
CKAP4	LAMP2	949	363	956	864	843	0.320	12.66	13.34	9.58	11.78	10.97	12.69	11.53	12.37	10.05	12.70
FAM49A	LAMP2	1000	297	862	766	806	0.533	12.02	13.34	12.15	11.78	7.72	12.69	10.32	12.37	9.68	12.70
FPR1	LAMP2	972	441	786	767	268	0.667	16.67	13.34	5.00	11.78	7.63	12.69	10.81	12.37	6.27	12.70
HN1	LAMP2	940	82	972	922	741	0.329	12.51	13.34	10.72	11.78	9.27	12.69	9.83	12.37	10.96	12.70
KIAA0319L	LAMP2	988	499	987	912	981	0.286	12.29	13.34	12.02	11.78	12.04	12.69	11.82	12.37	11.99	12.70
KIAA0513	LAMP2	973	54	912	821	448	0.580	12.27	13.34	14.34	11.78	8.35	12.69	10.24	12.37	10.70	12.70
CTSC	LAMTOR2	947	585	860	940	659	0.372	12.74	10.59	6.93	9.51	10.18	11.05	12.96	9.42	9.13	10.05
ING1	LAPTM5	698	575	225	368	781	0.260	10.59	17.05	8.50	8.70	9.47	10.31	8.94	14.12	8.97	8.61
CCDC132	LARP4	1000	766	944	638	865	0.394	9.03	8.86	10.28	9.42	9.11	12.19	9.04	10.81	10.08	11.77
COG6	LARP4	998	900	935	720	673	0.382	8.43	8.86	9.49	9.42	9.22	12.19	8.63	10.81	9.29	11.77
DROSHA	LARP4	893	763	804	716	777	0.256	9.91	8.86	10.95	9.42	10.01	12.19	10.34	10.81	10.79	11.77
GLS	LARP4	994	706	479	967	791	0.506	11.04	8.86	12.80	9.42	9.64	12.19	12.55	10.81	10.56	11.77
GEMIN4	LARS2	963	623	807	789	497	0.567	9.48	8.96	8.30	10.48	9.52	10.06	9.80	8.65	10.18	9.74
C1orf123	LAS1L	796	915	981	982	984	0.000	10.05	10.28	10.23	12.01	10.02	10.31	9.93	10.41	10.86	10.52
COG2	LAS1L	869	936	918	962	847	0.011	9.65	10.28	9.52	12.01	9.51	10.31	9.29	10.41	10.44	10.52
DDX47	LAS1L	989	929	986	949	911	0.090	7.13	10.28	5.35	12.01	6.80	10.31	6.32	10.41	7.68	10.52
DIS3L	LAS1L	972	838	934	940	464	0.338	9.52	10.28	10.21	12.01	9.94	10.31	9.15	10.41	11.13	10.52
ECHS1	LAS1L	986	688	419	939	430	0.658	10.75	10.28	12.15	12.01	14.92	10.31	10.96	10.41	12.67	10.52
EVL	LAS1L	998	932	450	701	683	0.588	12.73	10.28	13.78	12.01	12.91	10.31	12.35	10.41	10.51	10.52
HINFP	LAS1L	965	980	510	944	987	0.238	10.29	10.28	9.85	12.01	9.44	10.31	9.24	10.41	9.64	10.52
IKBKAP	LAS1L	925	984	931	973	934	0.000	10.26	10.28	11.72	12.01	11.26	10.31	11.03	10.41	10.87	10.52
HSPA1A	LASP1	18	118	45	188	284	0.000	14.07	13.69	11.87	12.15	13.29	12.63	12.51	12.98	11.61	10.19
C11orf83	LAT	673	647	541	689	836	0.079	7.89	11.14	6.80	7.69	8.06	8.32	6.26	8.92	8.28	6.97
C19orf12	LAT	936	527	337	797	218	0.710	9.31	11.14	10.40	7.69	11.19	8.32	8.92	8.92	11.32	6.97
CCDC167	LAT	824	445	358	563	575	0.579	8.61	11.14	7.29	7.69	9.20	8.32	6.59	8.92	7.87	6.97
HRAS	LAT	974	640	826	781	883	0.383	9.27	11.14	11.16	7.69	9.35	8.32	9.68	8.92	10.52	6.97
LAGE3	LAT	946	566	385	599	734	0.693	8.82	11.14	9.83	7.69	8.59	8.32	7.28	8.92	8.96	6.97
CPD	LATS2	969	565	812	761	890	0.424	13.16	10.21	10.70	6.80	12.03	9.54	12.42	10.90	10.88	11.13
DIRC2	LATS2	969	728	927	921	559	0.370	10.49	10.21	8.15	6.80	8.26	9.54	8.61	10.90	10.75	11.13
ARMC1	LBH	877	515	544	772	480	0.589	8.89	10.01	9.94	6.27	9.98	7.61	9.05	11.41	10.42	8.17
ATAD1	LBH	868	633	470	736	470	0.551	9.64	10.01	10.63	6.27	10.56	7.61	10.49	11.41	11.53	8.17
ATIC	LBH	942	542	319	412	400	0.863	10.39	10.01	10.72	6.27	10.81	7.61	10.26	11.41	11.27	8.17
BIN1	LBH	906	154	300	480	405	0.812	11.42	10.01	13.38	6.27	10.84	7.61	10.41	11.41	15.53	8.17
C12orf65	LBH	973	544	524	642	418	0.841	8.73	10.01	8.98	6.27	9.31	7.61	8.57	11.41	9.26	8.17
C1QBP	LBH	835	648	286	354	539	0.577	10.41	10.01	10.78	6.27	11.31	7.61	10.25	11.41	11.65	8.17
CAAP1	LBH	863	361	213	667	703	0.541	8.12	10.01	8.03	6.27	9.98	7.61	8.15	11.41	8.98	8.17
CAND1	LBH	919	581	609	637	698	0.576	10.66	10.01	11.94	6.27	11.56	7.61	11.81	11.41	10.79	8.17
CCT7	LBH	813	650	407	521	455	0.540	11.96	10.01	12.27	6.27	11.95	7.61	12.36	11.41	13.25	8.17
DIEXF	LBH	919	586	252	557	532	0.750	9.01	10.01	8.79	6.27	9.61	7.61	8.34	11.41	9.23	8.17
EBAG9	LBH	888	611	480	742	382	0.600	8.78	10.01	9.32	6.27	9.77	7.61	8.98	11.41	10.15	8.17
EI24	LBH	887	664	61	617	375	0.633	9.75	10.01	11.16	6.27	13.27	7.61	11.32	11.41	12.21	8.17
ELK4	LBH	986	92	567	419	442	0.939	10.33	10.01	9.53	6.27	11.24	7.61	11.47	11.41	11.36	8.17
FBXO21	LBH	980	379	366	655	427	0.882	9.27	10.01	11.45	6.27	10.83	7.61	10.71	11.41	11.23	8.17
GNPNAT1	LBH	844	665	294	331	313	0.606	7.19	10.01	6.79	6.27	10.26	7.61	7.43	11.41	8.76	8.17
HIBADH	LBH	908	234	265	834	326	0.649	8.63	10.01	9.43	6.27	12.28	7.61	9.38	11.41	11.73	8.17
HLTF	LBH	725	453	507	801	434	0.334	8.79	10.01	10.44	6.27	9.72	7.61	8.94	11.41	9.40	8.17
HSPA8	LBH	877	728	605	411	345	0.588	14.19	10.01	16.15	6.27	14.51	7.61	15.19	11.41	15.30	8.17
IPO7	LBH	927	480	442	320	256	0.854	10.55	10.01	11.79	6.27	11.62	7.61	12.38	11.41	13.82	8.17
ATAD1	LBR	887	649	931	994	896	0.119	9.64	12.61	10.63	8.63	10.56	11.22	10.49	11.01	11.53	9.94
ADH5	LCMT1	928	494	645	1000	996	0.355	10.47	9.89	11.15	10.61	12.91	8.40	12.18	8.86	11.72	10.57
C5orf51	LCMT2	974	757	894	987	836	0.217	9.99	7.86	9.75	7.28	9.84	8.16	9.62	6.75	9.20	8.37
GNAQ	LCP1	964	227	536	747	895	0.589	12.03	17.49	12.72	6.72	10.87	11.25	12.41	13.38	10.69	8.29
KIF1B	LCP1	986	310	844	670	385	0.715	11.81	17.49	14.55	6.72	11.45	11.25	11.55	13.38	14.58	8.29
ABLIM1	LDHB	988	654	443	673	424	0.812	11.00	12.28	13.27	14.91	12.16	9.67	13.05	13.24	13.22	12.69
ANAPC16	LDHB	732	660	776	910	643	0.081	11.73	12.28	10.38	14.91	11.96	9.67	11.58	13.24	12.64	12.69
AQP3	LDHB	972	117	685	951	353	0.626	9.85	12.28	4.58	14.91	12.66	9.67	11.45	13.24	7.94	12.69
CCNB1IP1	LDHB	999	825	242	603	499	0.784	9.46	12.28	9.93	14.91	10.64	9.67	10.36	13.24	10.92	12.69
DIEXF	LDHB	926	855	727	950	198	0.348	9.01	12.28	8.79	14.91	9.61	9.67	8.34	13.24	9.23	12.69
EIF2D	LDHB	999	807	882	882	507	0.459	10.49	12.28	9.30	14.91	10.49	9.67	10.36	13.24	11.12	12.69
FAM102A	LDHB	981	638	619	789	270	0.689	11.21	12.28	12.67	14.91	11.19	9.67	10.81	13.24	8.69	12.69
FBL	LDHB	999	715	926	965	123	0.445	11.57	12.28	9.99	14.91	10.79	9.67	11.15	13.24	11.32	12.69
FOXP1	LDHB	745	847	533	366	328	0.351	11.49	12.28	10.43	14.91	10.41	9.67	11.61	13.24	9.99	12.69
KDSR	LDHB	976	712	668	940	211	0.542	9.50	12.28	10.50	14.91	11.73	9.67	11.01	13.24	10.02	12.69
ATIC	LDLRAP1	837	156	778	717	862	0.258	10.39	11.32	10.72	8.94	10.81	11.12	10.26	10.43	11.27	9.97
BAG3	LDLRAP1	131	181	386	147	813	0.000	10.13	11.32	10.80	8.94	10.72	11.12	11.79	10.43	14.54	9.97
C10orf2	LDLRAP1	962	537	683	553	810	0.632	8.15	11.32	7.25	8.94	8.68	11.12	6.85	10.43	9.81	9.97
CCT3	LDLRAP1	834	344	876	716	934	0.226	11.84	11.32	12.29	8.94	12.53	11.12	12.15	10.43	12.75	9.97
GPATCH4	LDLRAP1	853	202	719	463	776	0.459	9.39	11.32	10.09	8.94	9.77	11.12	9.35	10.43	11.51	9.97
HABP4	LDLRAP1	758	98	585	714	870	0.237	8.60	11.32	12.35	8.94	8.25	11.12	8.96	10.43	9.71	9.97
ICAM2	LDLRAP1	741	50	511	711	634	0.304	10.62	11.32	6.48	8.94	6.26	11.12	9.55	10.43	8.59	9.97
ITGA6	LDLRAP1	828	18	917	727	754	0.252	9.80	11.32	10.03	8.94	9.60	11.12	11.64	10.43	10.73	9.97
LDHB	LDLRAP1	890	29	742	699	340	0.559	12.28	11.32	14.91	8.94	9.67	11.12	13.24	10.43	12.69	9.97
ABLIM1	LEF1	997	491	120	524	220	0.982	11.00	10.52	13.27	7.93	12.16	4.32	13.05	7.56	13.22	3.91
FOXP1	LEF1	724	394	320	814	625	0.274	11.49	10.52	10.43	7.93	10.41	4.32	11.61	7.56	9.99	3.91
LDLRAP1	LEF1	984	84	522	628	594	0.846	11.32	10.52	8.94	7.93	11.12	4.32	10.43	7.56	9.97	3.91
C2orf42	LEO1	986	962	545	994	979	0.236	9.24	8.82	8.40	8.93	9.24	9.72	7.27	8.23	8.42	9.22
C6orf48	LEPROTL1	899	455	475	699	590	0.653	11.18	11.33	11.00	10.27	10.46	10.06	11.84	10.34	10.56	9.47
DCAF16	LEPROTL1	955	798	815	606	731	0.435	9.47	11.33	9.30	10.27	8.80	10.06	9.92	10.34	9.85	9.47
FBL	LEPROTL1	846	711	982	771	761	0.147	11.57	11.33	9.99	10.27	10.79	10.06	11.15	10.34	11.32	9.47
FLJ10038	LEPROTL1	101	108	96	50	47	0.000	0.00	11.33	0.00	10.27	0.00	10.06	0.00	10.34	0.00	9.47
HDAC1	LETMD1	965	304	672	851	871	0.483	12.05	10.66	9.64	11.01	11.54	11.18	11.65	10.69	9.87	10.36
EMC8	LGALS1	939	690	602	773	562	0.565	9.93	12.94	8.96	11.92	9.29	11.12	8.79	13.42	9.92	12.98
HCCS	LGALS1	836	545	614	711	623	0.425	9.84	12.94	8.58	11.92	9.03	11.12	8.48	13.42	10.87	12.98
FAM214B	LGALS3	262	272	776	745	649	0.000	12.64	12.33	10.63	10.38	9.48	8.29	10.80	13.20	9.94	10.66
FGFR1OP2	LGALS3	522	169	828	712	828	0.011	10.99	12.33	11.01	10.38	10.09	8.29	10.63	13.20	10.39	10.66
ABLIM3	LGALSL	839	898	417	583	30	0.467	9.59	10.03	11.06	9.15	13.51	8.51	11.40	9.48	11.98	10.42
CTTN	LGALSL	538	839	688	869	42	0.019	9.56	10.03	12.84	9.15	12.47	8.51	13.23	9.48	12.31	10.42
DAB2	LGALSL	257	649	728	584	573	0.000	10.19	10.03	7.96	9.15	9.53	8.51	12.96	9.48	10.09	10.42
GNG11	LGALSL	794	150	714	268	712	0.375	9.61	10.03	8.71	9.15	9.02	8.51	11.59	9.48	9.78	10.42
ECHDC2	LIG1	991	631	497	899	858	0.538	10.04	10.40	10.14	8.99	14.81	9.57	11.26	9.40	11.29	8.40
HSD17B8	LIG1	981	381	819	649	718	0.619	8.30	10.40	6.81	8.99	10.24	9.57	7.53	9.40	8.88	8.40
ABTB1	LILRB1	83	89	662	148	604	0.000	14.76	11.36	12.04	5.07	10.34	7.76	11.46	9.38	11.23	5.27
ANO10	LILRB1	400	189	904	351	473	0.000	11.23	11.36	9.52	5.07	8.98	7.76	9.80	9.38	9.44	5.27
ARHGEF11	LILRB1	403	174	840	570	361	0.000	11.85	11.36	12.40	5.07	11.19	7.76	11.69	9.38	11.19	5.27
CAMKK2	LILRB1	187	30	325	585	751	0.000	13.08	11.36	14.10	5.07	11.70	7.76	11.53	9.38	10.02	5.27
DENND1A	LILRB1	835	194	551	620	372	0.585	11.31	11.36	11.33	5.07	10.18	7.76	9.45	9.38	10.30	5.27
DNTTIP1	LILRB1	305	356	726	271	506	0.000	11.51	11.36	8.97	5.07	8.97	7.76	9.33	9.38	10.64	5.27
EXT1	LILRB1	437	83	778	311	455	0.000	10.59	11.36	8.85	5.07	11.74	7.76	11.39	9.38	8.74	5.27
INPPL1	LILRB1	754	528	815	551	430	0.342	12.89	11.36	11.71	5.07	11.93	7.76	13.14	9.38	13.03	5.27
ARAP3	LILRB3	904	381	835	301	323	0.640	12.08	12.42	9.57	2.23	8.91	5.95	11.99	7.77	9.57	4.65
ARHGAP26	LILRB3	985	79	679	652	648	0.731	13.29	12.42	11.84	2.23	9.41	5.95	11.19	7.77	10.63	4.65
ARHGEF11	LILRB3	987	39	788	707	582	0.685	11.85	12.42	12.40	2.23	11.19	5.95	11.69	7.77	11.19	4.65
ATP6AP1	LILRB3	875	76	886	723	549	0.426	13.29	12.42	13.19	2.23	11.67	5.95	13.09	7.77	11.37	4.65
ATP6V0B	LILRB3	988	99	913	855	702	0.491	13.65	12.42	12.20	2.23	12.06	5.95	12.02	7.77	11.51	4.65
ATP6V0D1	LILRB3	987	36	801	780	679	0.594	13.64	12.42	12.71	2.23	11.55	5.95	12.10	7.77	12.12	4.65
BCL6	LILRB3	989	726	925	760	671	0.437	15.42	12.42	11.51	2.23	12.59	5.95	13.82	7.77	14.96	4.65
CAMKK2	LILRB3	980	5	403	633	642	0.823	13.08	12.42	14.10	2.23	11.70	5.95	11.53	7.77	10.02	4.65
CHMP2A	LILRB3	967	222	816	783	691	0.539	12.87	12.42	11.32	2.23	11.57	5.95	11.39	7.77	11.82	4.65
CHST15	LILRB3	983	192	727	951	398	0.627	13.55	12.42	10.43	2.23	10.27	5.95	11.18	7.77	10.36	4.65
DEDD2	LILRB3	748	262	835	504	586	0.327	13.00	12.42	10.25	2.23	9.94	5.95	9.95	7.77	9.57	4.65
DEF8	LILRB3	928	94	865	731	688	0.464	12.71	12.42	12.54	2.23	10.98	5.95	11.45	7.77	10.66	4.65
DNTTIP1	LILRB3	999	238	833	793	613	0.628	11.51	12.42	8.97	2.23	8.97	5.95	9.33	7.77	10.64	4.65
FCGRT	LILRB3	972	550	110	477	561	0.888	13.82	12.42	9.79	2.23	13.71	5.95	13.32	7.77	11.02	4.65
GAA	LILRB3	938	167	560	485	579	0.806	12.59	12.42	11.43	2.23	12.19	5.95	12.41	7.77	11.80	4.65
GPR108	LILRB3	848	203	815	631	695	0.376	12.41	12.42	10.43	2.23	11.07	5.95	11.10	7.77	9.91	4.65
ACSL5	LIMA1	952	183	549	245	822	0.719	10.94	8.49	8.33	9.48	12.76	9.96	11.40	12.67	8.25	10.69
ALDH18A1	LIMA1	959	494	556	389	721	0.779	9.40	8.49	9.84	9.48	10.83	9.96	9.86	12.67	8.65	10.69
AP3M1	LIMA1	737	606	828	565	410	0.270	10.63	8.49	9.27	9.48	10.50	9.96	10.35	12.67	10.31	10.69
AP5M1	LIMA1	530	472	837	583	315	0.030	9.81	8.49	9.09	9.48	9.79	9.96	9.05	12.67	10.10	10.69
APOOL	LIMA1	749	397	833	379	98	0.373	5.70	8.49	4.11	9.48	6.92	9.96	4.98	12.67	7.81	10.69
ARV1	LIMA1	625	470	719	288	551	0.162	8.14	8.49	9.18	9.48	9.12	9.96	8.04	12.67	9.13	10.69
ATIC	LIMA1	918	422	758	171	359	0.707	10.39	8.49	10.72	9.48	10.81	9.96	10.26	12.67	11.27	10.69
ATPAF1	LIMA1	640	414	753	477	489	0.210	9.86	8.49	12.33	9.48	11.43	9.96	9.78	12.67	12.53	10.69
C14orf1	LIMA1	923	343	360	128	755	0.719	9.34	8.49	10.11	9.48	11.73	9.96	10.12	12.67	9.19	10.69
CCT4	LIMA1	943	293	845	437	577	0.675	11.36	8.49	11.87	9.48	11.52	9.96	11.78	12.67	12.30	10.69
CSE1L	LIMA1	921	531	901	504	392	0.624	10.35	8.49	10.96	9.48	10.78	9.96	10.85	12.67	11.76	10.69
DIMT1	LIMA1	986	631	883	693	299	0.619	9.39	8.49	9.59	9.48	9.04	9.96	9.52	12.67	9.73	10.69
DLAT	LIMA1	964	345	761	299	217	0.797	8.98	8.49	10.09	9.48	9.91	9.96	9.56	12.67	12.09	10.69
DNAJA3	LIMA1	977	331	600	346	363	0.904	9.88	8.49	10.89	9.48	12.24	9.96	10.27	12.67	12.35	10.69
DNAJC16	LIMA1	846	420	763	505	381	0.558	9.39	8.49	9.49	9.48	10.53	9.96	9.15	12.67	10.41	10.69
EFTUD1	LIMA1	957	535	917	345	575	0.650	9.55	8.49	7.98	9.48	8.71	9.96	8.70	12.67	10.02	10.69
ELP3	LIMA1	891	242	744	284	325	0.660	10.04	8.49	10.54	9.48	10.29	9.96	9.37	12.67	10.96	10.69
GEMIN5	LIMA1	958	609	764	299	380	0.730	9.02	8.49	9.18	9.48	9.18	9.96	9.14	12.67	10.59	10.69
GRSF1	LIMA1	852	306	869	504	489	0.526	10.74	8.49	11.88	9.48	11.42	9.96	11.18	12.67	13.18	10.69
HADH	LIMA1	963	500	257	308	404	0.926	9.31	8.49	9.88	9.48	12.92	9.96	10.15	12.67	12.83	10.69
HSPA8	LIMA1	875	142	746	398	133	0.627	14.19	8.49	16.15	9.48	14.51	9.96	15.19	12.67	15.30	10.69
LARS2	LIMA1	971	306	701	382	756	0.714	8.96	8.49	10.48	9.48	10.06	9.96	8.65	12.67	9.74	10.69
CD2BP2	LIME1	715	774	12	805	788	0.107	11.98	11.54	11.70	10.12	10.71	12.67	11.41	8.81	11.56	8.56
CIB1	LIME1	900	472	15	647	837	0.558	11.73	11.54	9.92	10.12	12.09	12.67	11.19	8.81	10.34	8.56
CNPY2	LIME1	859	767	40	649	944	0.331	9.86	11.54	10.08	10.12	11.46	12.67	10.08	8.81	9.57	8.56
FARSA	LIME1	912	477	2	603	837	0.604	10.63	11.54	11.62	10.12	10.82	12.67	9.94	8.81	11.16	8.56
FBL	LIME1	933	859	11	613	926	0.417	11.57	11.54	9.99	10.12	10.79	12.67	11.15	8.81	11.32	8.56
FLAD1	LIME1	974	791	12	800	901	0.452	10.40	11.54	9.31	10.12	10.31	12.67	9.53	8.81	10.42	8.56
FTSJ1	LIME1	897	661	1	616	816	0.497	10.23	11.54	9.43	10.12	9.46	12.67	9.93	8.81	9.87	8.56
ITPA	LIME1	947	567	46	674	720	0.663	10.18	11.54	9.44	10.12	10.03	12.67	9.46	8.81	9.50	8.56
DHX34	LIMK2	817	370	849	831	809	0.163	13.36	13.94	9.75	10.25	10.42	10.80	10.15	12.07	9.82	10.38
ARL1	LIN52	979	979	941	910	861	0.113	9.11	7.89	11.04	8.65	11.31	8.40	10.95	7.64	11.27	8.55
CETN3	LINC00116	623	319	884	874	751	0.061	5.83	7.99	7.88	8.23	7.96	8.78	7.35	7.44	8.01	11.30
APOE	LINC00482	2	402	254	318	42	0.000	8.26	8.14	14.36	3.32	16.57	8.04	12.62	5.68	8.73	6.92
CIAPIN1	LINC00667	949	856	695	885	923	0.218	10.19	9.16	10.37	10.12	10.27	10.61	9.97	10.12	10.77	10.80
AAK1	LINC00674	801	66	760	529	587	0.414	9.20	6.05	12.16	4.32	7.27	5.01	7.95	4.34	9.38	6.59
COL1A1	LINC00982	441	111	553	64	672	0.000	8.40	3.76	6.87	10.51	11.90	4.98	14.71	6.84	10.66	5.50
FAM102A	LINC01128	0	0	0	0	0	0.000	11.21	0.00	12.67	0.00	11.19	0.00	10.81	0.00	8.69	0.00
AKAP1	LINS	981	972	792	847	431	0.406	9.26	9.88	11.42	7.88	12.35	8.50	11.05	8.34	13.22	8.67
CEP68	LINS	933	938	849	509	686	0.378	10.17	9.88	10.65	7.88	8.45	8.50	9.84	8.34	11.68	8.67
KLHL3	LINS	921	912	579	409	429	0.597	7.68	9.88	10.45	7.88	8.42	8.50	8.60	8.34	8.48	8.67
LDHB	LINS	936	792	773	874	290	0.403	12.28	9.88	14.91	7.88	9.67	8.50	13.24	8.34	12.69	8.67
ALDH18A1	LIX1L	566	714	495	526	380	0.086	9.40	10.66	9.84	9.23	10.83	9.64	9.86	10.37	8.65	11.30
ARMC1	LIX1L	781	560	983	746	889	0.128	8.89	10.66	9.94	9.23	9.98	9.64	9.05	10.37	10.42	11.30
C14orf1	LIX1L	794	724	498	272	572	0.440	9.34	10.66	10.11	9.23	11.73	9.64	10.12	10.37	9.19	11.30
CYB5B	LIX1L	897	770	832	855	542	0.294	10.61	10.66	10.90	9.23	10.63	9.64	10.71	10.37	10.66	11.30
DDX18	LIX1L	919	691	727	517	944	0.411	10.58	10.66	10.07	9.23	10.87	9.64	10.98	10.37	10.73	11.30
DIEXF	LIX1L	946	434	608	357	844	0.666	9.01	10.66	8.79	9.23	9.61	9.64	8.34	10.37	9.23	11.30
DKC1	LIX1L	929	701	507	344	854	0.577	10.24	10.66	9.41	9.23	10.22	9.64	10.14	10.37	10.86	11.30
DLAT	LIX1L	857	525	646	513	250	0.622	8.98	10.66	10.09	9.23	9.91	9.64	9.56	10.37	12.09	11.30
ELP3	LIX1L	922	293	809	566	846	0.483	10.04	10.66	10.54	9.23	10.29	9.64	9.37	10.37	10.96	11.30
FAM134C	LIX1L	997	455	915	814	812	0.473	11.77	10.66	10.75	9.23	11.60	9.64	10.86	10.37	10.94	11.30
G3BP1	LIX1L	988	943	766	806	794	0.322	11.25	10.66	10.66	9.23	12.29	9.64	12.48	10.37	12.76	11.30
IMP3	LIX1L	938	330	821	401	501	0.715	9.89	10.66	10.11	9.23	10.89	9.64	9.50	10.37	10.50	11.30
GLCCI1	LMAN1	899	695	410	306	833	0.534	9.76	10.09	9.41	9.98	8.68	13.69	9.53	12.28	8.29	11.76
EFHD2	LMAN2	991	826	520	785	843	0.495	14.65	12.80	12.49	10.35	10.79	13.15	12.04	12.08	8.61	10.78
ICAM2	LMAN2	441	597	833	713	621	0.000	10.62	12.80	6.48	10.35	6.26	13.15	9.55	12.08	8.59	10.78
GNAZ	LMNA	370	82	808	585	732	0.000	8.47	10.66	11.65	10.60	4.83	12.56	5.87	14.09	7.02	13.27
DNTTIP1	LMO2	947	496	704	220	764	0.660	11.51	11.06	8.97	9.56	8.97	7.60	9.33	10.53	10.64	10.35
FAU	LOC100129361	0	0	0	0	0	0.000	13.29	0.00	12.54	0.00	13.32	0.00	13.37	0.00	13.35	0.00
ADPRM	LOC100506548	0	0	0	0	0	0.000	9.06	0.00	6.09	0.00	8.23	0.00	7.24	0.00	8.76	0.00
COX11	LOC100506548	0	0	0	0	0	0.000	8.84	0.00	9.97	0.00	10.29	0.00	9.49	0.00	10.76	0.00
CYP2R1	LOC100506548	0	0	0	0	0	0.000	9.05	0.00	7.70	0.00	8.87	0.00	8.73	0.00	8.27	0.00
DPH5	LOC100506548	0	0	0	0	0	0.000	8.50	0.00	7.02	0.00	8.34	0.00	7.33	0.00	9.11	0.00
EIF2D	LOC100506548	0	0	0	0	0	0.000	10.49	0.00	9.30	0.00	10.49	0.00	10.36	0.00	11.12	0.00
GTF3A	LOC100506548	0	0	0	0	0	0.000	11.71	0.00	11.36	0.00	11.88	0.00	10.84	0.00	12.59	0.00
KLHL9	LOC100506548	0	0	0	0	0	0.000	9.83	0.00	9.63	0.00	10.00	0.00	9.93	0.00	9.40	0.00
LDHB	LOC100506548	0	0	0	0	0	0.000	12.28	0.00	14.91	0.00	9.67	0.00	13.24	0.00	12.69	0.00
HAX1	LOC148413	0	0	0	0	0	0.000	11.05	0.00	11.02	0.00	11.39	0.00	10.61	0.00	12.15	0.00
LIME1	LOC550643	0	0	0	0	0	0.000	11.54	0.00	10.12	0.00	12.67	0.00	8.81	0.00	8.56	0.00
FAHD2CP	LOC728743	0	0	0	0	0	0.000	6.30	0.00	8.11	0.00	5.81	0.00	5.35	0.00	7.28	0.00
IKBKB	LONP1	755	564	920	829	873	0.096	11.86	10.82	10.09	11.81	10.97	12.43	11.86	11.24	11.38	12.07
ITGB7	LONP1	986	298	122	70	629	0.907	11.72	10.82	4.64	11.81	8.41	12.43	7.94	11.24	5.52	12.07
LAT	LONP1	950	704	59	411	838	0.629	11.14	10.82	7.69	11.81	8.32	12.43	8.92	11.24	6.97	12.07
GPR56	LPCAT1	806	394	912	324	920	0.306	11.55	13.23	13.08	11.33	8.34	9.78	11.86	13.90	10.02	8.88
CDK19	LPGAT1	997	961	203	870	877	0.390	10.50	12.16	10.88	11.24	9.21	12.53	9.32	10.93	9.20	10.74
CEBPB	LPGAT1	567	50	312	545	561	0.081	13.99	12.16	9.38	11.24	13.22	12.53	12.98	10.93	12.77	10.74
ASB1	LPIN1	306	710	533	855	441	0.000	10.59	10.30	11.20	11.59	10.02	11.81	10.28	11.38	11.55	14.13
CAPRIN2	LPIN1	977	848	757	887	13	0.458	9.92	10.30	12.03	11.59	10.53	11.81	10.68	11.38	10.31	14.13
DDHD2	LPIN1	997	764	290	760	140	0.732	9.57	10.30	11.79	11.59	9.56	11.81	10.54	11.38	10.54	14.13
DROSHA	LPIN1	983	848	634	651	394	0.649	9.91	10.30	10.95	11.59	10.01	11.81	10.34	11.38	10.79	14.13
ENOSF1	LPIN1	989	311	125	669	218	0.893	8.76	10.30	8.48	11.59	11.94	11.81	10.47	11.38	9.61	14.13
HCG18	LPIN1	980	628	718	757	544	0.636	9.77	10.30	9.52	11.59	9.08	11.81	9.45	11.38	9.36	14.13
KIAA1147	LPIN1	999	789	666	673	146	0.684	9.94	10.30	11.56	11.59	11.46	11.81	11.50	11.38	10.07	14.13
AGTRAP	LPPR2	0	0	0	0	0	0.000	13.34	0.00	7.84	0.00	9.28	0.00	10.87	0.00	10.06	0.00
ARAP3	LPPR2	0	0	0	0	0	0.000	12.08	0.00	9.57	0.00	8.91	0.00	11.99	0.00	9.57	0.00
CSF3R	LPPR2	0	0	0	0	0	0.000	18.27	0.00	7.67	0.00	10.07	0.00	13.80	0.00	8.07	0.00
FCGRT	LPPR2	0	0	0	0	0	0.000	13.82	0.00	9.79	0.00	13.71	0.00	13.32	0.00	11.02	0.00
GAB2	LPPR2	0	0	0	0	0	0.000	12.95	0.00	11.48	0.00	8.53	0.00	11.88	0.00	9.64	0.00
IL17RA	LPPR2	0	0	0	0	0	0.000	13.86	0.00	8.86	0.00	10.17	0.00	11.36	0.00	8.63	0.00
JDP2	LPPR2	0	0	0	0	0	0.000	11.75	0.00	9.82	0.00	9.63	0.00	11.05	0.00	9.88	0.00
LILRB1	LPPR2	0	0	0	0	0	0.000	11.36	0.00	5.07	0.00	7.76	0.00	9.38	0.00	5.27	0.00
DKC1	LPXN	965	795	140	680	602	0.641	10.24	11.68	9.41	7.10	10.22	8.89	10.14	9.82	10.86	7.67
ESYT2	LPXN	963	658	645	590	668	0.645	11.29	11.68	11.46	7.10	11.19	8.89	12.42	9.82	12.53	7.67
HNRNPAB	LPXN	973	655	115	694	405	0.771	11.13	11.68	10.23	7.10	11.86	8.89	11.81	9.82	12.03	7.67
HNRNPF	LPXN	963	638	222	759	382	0.728	12.68	11.68	10.54	7.10	13.00	8.89	12.81	9.82	12.10	7.67
HNRNPUL2	LPXN	954	624	699	854	703	0.468	12.40	11.68	13.24	7.10	11.91	8.89	12.63	9.82	12.68	7.67
CSAD	LRMP	941	546	291	753	771	0.597	11.03	11.72	10.15	8.05	12.01	6.97	10.37	8.39	9.53	6.10
FGFR1OP	LRMP	986	750	474	628	635	0.716	9.56	11.72	9.43	8.05	10.88	6.97	8.99	8.39	9.06	6.10
CEACAM3	LRP10	714	492	292	126	259	0.428	12.31	14.72	1.33	11.24	4.69	12.35	6.04	13.66	2.77	12.01
GRK6	LRP10	990	8	964	933	989	0.287	13.69	14.72	10.19	11.24	9.40	12.35	10.55	13.66	9.89	12.01
ANGPTL4	LRP3	13	45	178	241	64	0.000	6.89	9.51	9.56	12.36	12.55	11.46	9.98	9.41	9.43	10.56
CMTM7	LRPAP1	911	190	968	950	784	0.269	11.80	13.15	4.61	12.11	7.65	12.03	10.12	12.38	7.08	11.70
CROT	LRPPRC	991	946	681	908	791	0.319	7.98	10.44	8.24	12.10	9.97	12.12	8.17	11.69	9.40	13.38
CWF19L2	LRPPRC	993	422	837	847	662	0.563	9.32	10.44	7.76	12.10	8.43	12.12	8.56	11.69	9.29	13.38
JRKL	LRPPRC	926	871	273	821	743	0.385	7.77	10.44	7.26	12.10	8.17	12.12	8.07	11.69	8.48	13.38
KIAA0355	LRPPRC	936	617	747	506	774	0.550	9.65	10.44	9.62	12.10	10.21	12.12	11.23	11.69	11.25	13.38
LBH	LRPPRC	945	612	393	564	369	0.802	10.01	10.44	6.27	12.10	7.61	12.12	11.41	11.69	8.17	13.38
LIMA1	LRPPRC	988	495	758	391	262	0.847	8.49	10.44	9.48	12.10	9.96	12.12	12.67	11.69	10.69	13.38
CYSTM1	LRRC4	892	83	525	346	451	0.771	13.01	10.69	10.56	11.78	10.17	5.91	11.46	6.72	12.44	6.20
CTSH	LRRC59	965	189	259	664	187	0.848	12.52	11.00	10.70	10.59	11.84	11.90	13.68	11.65	9.48	10.68
AASDHPPT	LRRC8C	992	914	693	707	773	0.441	9.13	10.33	10.72	8.58	10.05	7.21	8.97	9.85	10.52	8.84
ADNP	LRRC8C	962	814	812	943	774	0.253	10.91	10.33	11.46	8.58	11.47	7.21	11.71	9.85	11.79	8.84
ARMC1	LRRC8C	980	908	788	642	808	0.387	8.89	10.33	9.94	8.58	9.98	7.21	9.05	9.85	10.42	8.84
CSE1L	LRRC8C	982	719	842	739	653	0.487	10.35	10.33	10.96	8.58	10.78	7.21	10.85	9.85	11.76	8.84
ECI2	LRRC8C	858	420	519	691	528	0.597	9.22	10.33	9.65	8.58	12.22	7.21	9.26	9.85	11.86	8.84
EFR3A	LRRC8C	984	850	633	986	471	0.484	10.51	10.33	11.63	8.58	11.75	7.21	11.38	9.85	12.00	8.84
KRAS	LRRC8C	906	877	557	958	825	0.230	11.19	10.33	10.22	8.58	10.33	7.21	10.59	9.85	10.01	8.84
LRRC58	LRRC8C	992	865	692	873	833	0.352	9.50	10.33	9.97	8.58	10.04	7.21	10.30	9.85	9.99	8.84
ATG3	LRRK2	933	699	308	632	487	0.701	11.74	12.74	10.16	9.75	10.19	8.75	10.37	12.48	10.08	9.89
ENTPD1	LRRK2	1000	873	566	74	430	0.780	12.63	12.74	10.25	9.75	9.37	8.75	11.59	12.48	9.95	9.89
CTSO	LSM12	838	635	608	556	354	0.526	9.69	8.90	8.95	6.22	11.32	7.69	10.71	6.66	8.60	8.42
EID1	LSM12	853	988	696	855	535	0.237	10.52	8.90	12.65	6.22	11.33	7.69	11.57	6.66	11.94	8.42
CAMLG	LSM3	908	948	989	839	803	0.087	10.31	8.75	11.09	9.87	9.63	10.19	9.88	9.52	11.17	10.77
EEF1D	LSM3	831	643	965	931	947	0.094	13.45	8.75	11.95	9.87	13.19	10.19	13.28	9.52	13.56	10.77
ITM2A	LSM5	862	594	872	394	789	0.351	10.23	8.53	10.60	8.54	6.28	9.59	10.30	8.56	9.71	9.77
ANAPC16	LSM7	840	676	931	803	760	0.141	11.73	9.65	10.38	8.76	11.96	9.41	11.58	8.90	12.64	9.31
COX20	LSM7	763	764	942	423	891	0.132	10.48	9.65	11.34	8.76	10.96	9.41	11.33	8.90	11.71	9.31
LIME1	LSM7	928	866	92	835	944	0.291	11.54	9.65	10.12	8.76	12.67	9.41	8.81	8.90	8.56	9.31
ARF5	LST1	972	136	554	724	714	0.698	12.12	12.78	12.01	4.75	11.41	7.21	11.15	8.89	11.21	5.02
CHST15	LST1	691	156	754	573	104	0.250	13.55	12.78	10.43	4.75	10.27	7.21	11.18	8.89	10.36	5.02
FLOT1	LST1	890	370	786	762	578	0.467	14.37	12.78	13.28	4.75	12.62	7.21	13.20	8.89	12.77	5.02
KIAA0930	LTA4H	955	485	839	911	844	0.363	12.66	13.42	14.04	10.15	11.54	10.45	11.15	12.74	11.37	11.06
DNPH1	LTB	789	756	519	415	519	0.431	8.79	12.40	9.49	3.61	10.71	6.30	8.30	6.57	9.59	3.95
AGTRAP	LTB4R	1000	681	742	864	733	0.490	13.34	12.81	7.84	6.50	9.28	9.92	10.87	10.05	10.06	8.64
ARAP1	LTB4R	941	650	396	806	667	0.571	14.17	12.81	11.21	6.50	11.58	9.92	13.05	10.05	10.46	8.64
DENND1A	LTB4R	614	385	525	824	416	0.159	11.31	12.81	11.33	6.50	10.18	9.92	9.45	10.05	10.30	8.64
DNASE1L1	LTB4R	998	488	549	759	734	0.725	10.51	12.81	8.00	6.50	8.61	9.92	8.93	10.05	11.43	8.64
FCGRT	LTB4R	993	514	444	832	865	0.630	13.82	12.81	9.79	6.50	13.71	9.92	13.32	10.05	11.02	8.64
FKBP15	LTB4R	960	902	708	869	593	0.384	12.58	12.81	10.52	6.50	10.83	9.92	11.80	10.05	10.90	8.64
GNB2	LTB4R	972	715	395	861	731	0.540	14.46	12.81	12.56	6.50	12.63	9.92	13.27	10.05	12.26	8.64
GRN	LTB4R	979	764	129	641	776	0.618	14.41	12.81	10.49	6.50	12.21	9.92	14.41	10.05	11.40	8.64
JDP2	LTB4R	996	190	638	420	412	0.923	11.75	12.81	9.82	6.50	9.63	9.92	11.05	10.05	9.88	8.64
ABCC3	LTBP1	743	215	175	201	621	0.425	10.18	8.25	5.37	8.18	14.13	9.89	11.09	12.03	5.97	10.17
ABLIM3	LTBP1	759	55	56	777	465	0.389	9.59	8.25	11.06	8.18	13.51	9.89	11.40	12.03	11.98	10.17
CTTN	LTBP1	946	388	483	670	673	0.721	9.56	8.25	12.84	8.18	12.47	9.89	13.23	12.03	12.31	10.17
DMTN	LTBP1	268	120	177	556	194	0.000	13.62	8.25	14.72	8.18	10.36	9.89	9.94	12.03	11.31	10.17
ESAM	LTBP1	903	816	754	552	748	0.371	9.49	8.25	9.85	8.18	9.21	9.89	13.19	12.03	10.52	10.17
FAXDC2	LTBP1	673	559	524	545	712	0.196	11.01	8.25	10.92	8.18	12.04	9.89	11.36	12.03	9.41	10.17
GAS2L1	LTBP1	829	291	172	336	358	0.658	10.24	8.25	11.84	8.18	9.95	9.89	10.13	12.03	8.61	10.17
GNAZ	LTBP1	805	54	332	658	492	0.531	8.47	8.25	11.65	8.18	4.83	9.89	5.87	12.03	7.02	10.17
ANGPTL4	LTBP4	739	146	257	42	25	0.478	6.89	10.77	9.56	10.75	12.55	11.55	9.98	14.99	9.43	11.92
ACSS2	LTBR	969	336	55	878	530	0.734	11.19	12.01	10.40	7.98	12.50	12.97	12.02	12.30	12.83	10.36
ABHD10	LTV1	997	950	269	773	110	0.632	9.39	9.15	10.13	8.70	10.64	9.93	8.78	9.76	9.44	10.58
ANKMY2	LTV1	980	928	206	505	31	0.744	8.70	9.15	10.40	8.70	9.01	9.93	8.93	9.76	9.78	10.58
CCNB1IP1	LTV1	540	903	19	360	808	0.040	9.46	9.15	9.93	8.70	10.64	9.93	10.36	9.76	10.92	10.58
DCUN1D4	LUC7L	902	943	888	967	975	0.007	8.93	10.80	10.70	11.78	11.59	11.36	10.45	11.64	10.59	10.53
EIF4A2	LUC7L	951	696	734	879	778	0.358	12.09	10.80	14.85	11.78	13.40	11.36	14.05	11.64	14.63	10.53
KIAA1147	LUC7L	948	765	131	872	871	0.392	9.94	10.80	11.56	11.78	11.46	11.36	11.50	11.64	10.07	10.53
DNAJA3	LUC7L3	931	826	155	239	752	0.573	9.88	11.57	10.89	13.58	12.24	12.93	10.27	13.82	12.35	13.05
FBXO3	LUC7L3	1000	939	934	994	531	0.301	10.38	11.57	10.84	13.58	11.06	12.93	10.81	13.82	11.41	13.05
GFM2	LUC7L3	994	785	139	198	478	0.846	9.05	11.57	9.73	13.58	10.18	12.93	8.62	13.82	10.35	13.05
CCSER2	LUZP1	971	953	944	916	621	0.225	10.75	9.21	11.41	11.72	10.15	9.06	11.24	11.09	12.40	9.11
ECI2	LYAR	968	772	81	889	181	0.606	9.22	10.03	9.65	6.62	12.22	8.42	9.26	8.50	11.86	9.59
GAS5	LYRM2	749	649	168	666	349	0.341	10.47	8.91	10.44	10.15	11.25	9.46	12.07	9.20	10.80	10.73
ABHD14B	LYRM4	964	330	483	903	942	0.505	11.14	8.94	8.89	9.82	12.70	8.84	10.67	8.66	9.88	8.82
ADSL	LYRM5	936	718	644	799	951	0.324	10.59	8.66	9.07	9.27	10.19	10.17	9.86	7.94	12.92	10.39
DIEXF	LYRM7	980	974	718	952	259	0.388	9.01	8.48	8.79	9.64	9.61	9.26	8.34	7.86	9.23	10.89
KIAA0907	LYRM7	990	718	804	635	117	0.651	10.82	8.48	11.02	9.64	11.35	9.26	11.89	7.86	11.47	10.89
LIMA1	LYRM7	968	287	549	643	324	0.840	8.49	8.48	9.48	9.64	9.96	9.26	12.67	7.86	10.69	10.89
ABHD2	LYST	941	848	534	667	382	0.608	12.85	12.69	11.72	10.46	13.66	10.23	12.41	11.54	11.64	9.78
CREBL2	LZIC	793	909	999	963	973	0.000	10.34	9.48	11.30	8.67	11.21	8.90	10.87	8.12	9.68	9.44
CTSC	LZIC	984	681	990	884	554	0.416	12.74	9.48	6.93	8.67	10.18	8.90	12.96	8.12	9.13	9.44
HIGD1A	LZIC	987	866	942	891	884	0.182	10.14	9.48	12.76	8.67	13.09	8.90	11.30	8.12	12.14	9.44
AHCYL1	M6PR	981	204	1000	962	972	0.255	11.39	11.58	14.46	9.65	12.09	10.08	12.49	11.19	12.94	10.55
ANAPC1	MACF1	807	532	949	415	931	0.291	9.84	12.54	9.97	14.53	9.78	13.06	9.80	15.82	10.50	12.99
ATR	MACF1	945	593	941	177	923	0.411	9.59	12.54	9.64	14.53	10.15	13.06	9.93	15.82	9.68	12.99
CYFIP2	MACF1	855	314	467	627	275	0.646	13.30	12.54	14.10	14.53	10.95	13.06	10.57	15.82	9.29	12.99
APLP2	MAFB	776	751	247	683	514	0.328	14.29	11.39	14.14	8.22	14.20	10.88	15.53	10.91	12.35	9.95
EXT1	MAFB	552	837	2	38	245	0.078	10.59	11.39	8.85	8.22	11.74	10.88	11.39	10.91	8.74	9.95
CDC25B	MAGED1	996	782	754	539	234	0.705	11.88	9.90	11.52	13.19	11.00	12.23	13.12	11.92	9.78	11.30
DDX27	MAGED2	968	886	949	835	446	0.351	11.10	11.34	10.34	12.67	10.20	11.11	10.69	12.53	10.72	11.84
C12orf65	MAGEH1	990	982	825	977	898	0.139	8.73	8.10	8.98	10.79	9.31	8.89	8.57	9.47	9.26	8.46
EEF1G	MAGEH1	875	460	923	947	623	0.314	14.21	8.10	13.16	10.79	13.82	8.89	14.56	9.47	15.14	8.46
FAM102A	MAGEH1	935	831	679	902	890	0.219	11.21	8.10	12.67	10.79	11.19	8.89	10.81	9.47	8.69	8.46
FAM84B	MAGEH1	943	341	659	800	648	0.583	7.60	8.10	8.15	10.79	10.17	8.89	10.20	9.47	7.96	8.46
FAU	MAGEH1	820	464	912	876	848	0.160	13.29	8.10	12.54	10.79	13.32	8.89	13.37	9.47	13.35	8.46
GAS5	MAGEH1	797	464	576	772	576	0.382	10.47	8.10	10.44	10.79	11.25	8.89	12.07	9.47	10.80	8.46
GTPBP8	MAGEH1	976	977	877	941	739	0.185	8.03	8.10	6.61	10.79	7.50	8.89	6.89	9.47	9.44	8.46
HN1L	MAGEH1	989	366	816	904	748	0.494	9.83	8.10	8.62	10.79	11.82	8.89	10.75	9.47	10.47	8.46
LDLRAP1	MAGEH1	964	272	897	934	832	0.346	11.32	8.10	8.94	10.79	11.12	8.89	10.43	9.47	9.97	8.46
KLHL7	MAGT1	991	404	806	920	941	0.399	9.37	11.02	10.00	8.99	8.71	12.36	8.98	11.39	9.95	10.67
DHRS4-AS1	MAK16	969	707	12	680	508	0.741	8.44	8.40	8.64	8.02	10.59	8.81	7.95	8.31	8.48	9.50
ITM2A	MAK16	799	447	628	192	148	0.534	10.23	8.40	10.60	8.02	6.28	8.81	10.30	8.31	9.71	9.50
LBH	MAK16	871	680	418	399	483	0.652	10.01	8.40	6.27	8.02	7.61	8.81	11.41	8.31	8.17	9.50
ICAM2	MALSU1	169	457	854	741	800	0.000	10.62	9.28	6.48	8.46	6.26	9.76	9.55	8.44	8.59	10.41
LIME1	MAN1B1	948	811	203	798	973	0.367	11.54	11.55	10.12	11.31	12.67	11.57	8.81	11.29	8.56	10.54
BAG3	MAN1C1	481	175	67	262	24	0.000	10.13	8.83	10.80	10.92	10.72	10.67	11.79	9.86	14.54	8.45
FAM102A	MAN1C1	993	398	424	820	677	0.738	11.21	8.83	12.67	10.92	11.19	10.67	10.81	9.86	8.69	8.45
FAM134B	MAN1C1	794	656	694	174	50	0.413	8.58	8.83	10.14	10.92	10.10	10.67	8.97	9.86	13.00	8.45
LDHB	MAN1C1	979	718	267	380	494	0.849	12.28	8.83	14.91	10.92	9.67	10.67	13.24	9.86	12.69	8.45
GPCPD1	MAN2A2	722	527	388	634	218	0.363	13.13	13.09	11.10	12.51	10.29	12.37	12.80	12.39	11.02	12.95
LOC728392	MAN2A2	101	108	96	50	47	0.000	0.00	13.09	0.00	12.51	0.00	12.37	0.00	12.39	0.00	12.95
BCKDHA	MAN2B1	968	529	963	968	503	0.455	11.37	12.93	10.50	8.84	12.08	11.12	10.21	12.22	12.04	10.17
CCDC86	MAN2B1	927	702	786	615	873	0.366	8.66	12.93	8.09	8.84	8.38	11.12	7.98	12.22	9.88	10.17
CES2	MAN2B1	980	306	980	938	204	0.501	10.56	12.93	11.23	8.84	14.07	11.12	10.51	12.22	11.53	10.17
GSS	MAN2B1	880	445	960	958	800	0.230	10.38	12.93	10.31	8.84	11.14	11.12	10.26	12.22	10.01	10.17
AATF	MAN2B2	932	692	918	856	949	0.165	11.41	11.78	9.68	11.47	9.81	11.78	10.30	11.63	10.80	9.40
EFCAB14	MAP2K1	972	220	750	964	947	0.363	11.73	11.38	11.84	11.60	11.63	11.51	12.47	10.88	12.16	11.86
EPOR	MAP2K3	732	566	411	200	33	0.431	10.11	13.77	8.12	9.09	10.10	12.17	9.61	11.90	8.08	12.30
GLUL	MAP2K3	120	520	485	408	2	0.000	16.05	13.77	17.85	9.09	14.08	12.17	16.28	11.90	16.03	12.30
ATG7	MAP2K6	954	755	32	883	594	0.542	11.17	10.38	9.64	5.53	8.51	6.68	9.40	5.17	9.34	10.25
C10orf11	MAP2K6	466	239	790	499	236	0.000	7.98	10.38	4.39	5.53	7.66	6.68	6.46	5.17	6.24	10.25
CD63	MAP2K6	962	511	14	612	262	0.863	14.13	10.38	12.63	5.53	13.12	6.68	14.90	5.17	13.84	10.25
CKAP4	MAP2K6	997	877	16	543	373	0.784	12.66	10.38	9.58	5.53	10.97	6.68	11.53	5.17	10.05	10.25
CYFIP1	MAP2K6	596	842	29	675	384	0.096	10.70	10.38	11.11	5.53	11.36	6.68	12.58	5.17	11.04	10.25
ENTPD1	MAP2K6	995	790	130	529	281	0.831	12.63	10.38	10.25	5.53	9.37	6.68	11.59	5.17	9.95	10.25
FCER1G	MAP2K6	997	479	9	666	243	0.911	14.99	10.38	5.78	5.53	8.80	6.68	11.95	5.17	7.30	10.25
GLIPR2	MAP2K6	982	432	60	510	65	0.959	13.44	10.38	8.00	5.53	7.51	6.68	11.39	5.17	8.06	10.25
GLRX	MAP2K6	983	741	4	454	301	0.846	11.63	10.38	9.51	5.53	11.75	6.68	10.95	5.17	13.06	10.25
GNS	MAP2K6	984	875	12	753	425	0.654	13.48	10.38	10.62	5.53	11.77	6.68	13.23	5.17	11.76	10.25
GSK3B	MAP2K6	988	888	802	675	347	0.543	11.34	10.38	11.28	5.53	10.82	6.68	10.91	5.17	11.42	10.25
GYG1	MAP2K6	1000	688	9	836	392	0.738	13.35	10.38	10.41	5.53	9.30	6.68	11.04	5.17	14.29	10.25
COPA	MAP3K1	819	461	802	759	876	0.198	12.84	11.47	12.74	7.55	12.52	9.21	13.07	10.24	12.67	8.58
ITCH	MAP3K1	997	671	917	969	853	0.289	11.74	11.47	10.54	7.55	11.89	9.21	11.20	10.24	11.28	8.58
C10orf10	MAP3K10	500	18	272	334	248	0.000	9.58	9.90	10.57	13.19	12.35	8.97	14.61	9.06	12.39	10.42
ALDOA	MAP3K11	719	402	887	660	318	0.248	16.43	13.06	16.81	10.90	13.08	12.69	14.97	12.52	17.22	10.32
CHST15	MAP3K3	988	697	726	681	451	0.674	13.55	13.02	10.43	10.00	10.27	10.37	11.18	11.81	10.36	10.98
IL13RA1	MAP3K3	1000	421	807	891	821	0.490	12.26	13.02	8.64	10.00	12.92	10.37	12.22	11.81	11.50	10.98
LPGAT1	MAP3K3	999	894	731	935	916	0.260	12.16	13.02	11.24	10.00	12.53	10.37	10.93	11.81	10.74	10.98
LPPR2	MAP3K3	101	108	96	50	47	0.000	0.00	13.02	0.00	10.00	0.00	10.37	0.00	11.81	0.00	10.98
ABCE1	MAP3K4	983	980	528	769	818	0.418	9.41	9.81	9.86	10.19	10.65	9.81	10.36	10.14	11.08	10.83
AIFM1	MAP3K4	969	982	705	854	834	0.257	10.05	9.81	9.44	10.19	12.15	9.81	9.37	10.14	11.57	10.83
CEPT1	MAP3K4	829	979	971	983	992	0.000	10.18	9.81	8.48	10.19	10.10	9.81	9.81	10.14	9.06	10.83
EML4	MAP3K4	944	918	851	493	834	0.337	11.52	9.81	9.12	10.19	12.15	9.81	12.29	10.14	9.13	10.83
ENOSF1	MAP3K4	966	371	808	874	773	0.455	8.76	9.81	8.48	10.19	11.94	9.81	10.47	10.14	9.61	10.83
GART	MAP3K4	968	951	613	866	974	0.237	10.20	9.81	9.68	10.19	10.65	9.81	10.40	10.14	10.99	10.83
HSPA8	MAP3K4	910	877	671	659	818	0.307	14.19	9.81	16.15	10.19	14.51	9.81	15.19	10.14	15.30	10.83
HSPA9	MAP3K4	1000	909	574	764	914	0.419	11.52	9.81	13.42	10.19	14.02	9.81	12.94	10.14	14.31	10.83
IARS	MAP3K4	998	992	488	705	951	0.422	10.56	9.81	11.80	10.19	11.80	9.81	12.11	10.14	12.66	10.83
KIAA1279	MAP3K4	861	978	894	914	819	0.021	8.46	9.81	10.98	10.19	8.85	9.81	9.20	10.14	10.85	10.83
ENTPD1	MAP3K5	1000	886	682	607	260	0.662	12.63	11.48	10.25	11.12	9.37	9.90	11.59	10.74	9.95	9.51
FRAT2	MAP3K5	984	574	179	769	422	0.796	13.13	11.48	7.67	11.12	9.65	9.90	8.75	10.74	8.57	9.51
ITFG1	MAP3K5	996	576	826	916	104	0.583	10.47	11.48	11.35	11.12	10.75	9.90	10.71	10.74	10.68	9.51
LPGAT1	MAP3K5	1000	395	792	925	599	0.592	12.16	11.48	11.24	11.12	12.53	9.90	10.93	10.74	10.74	9.51
CEBPB	MAPK1	668	390	379	500	632	0.270	13.99	13.13	9.38	13.16	13.22	11.83	12.98	12.58	12.77	12.31
CHST15	MAPK1	972	958	704	856	670	0.350	13.55	13.13	10.43	13.16	10.27	11.83	11.18	12.58	10.36	12.31
CPQ	MAPK1	970	220	850	797	632	0.550	12.17	13.13	8.78	13.16	10.38	11.83	10.49	12.58	8.81	12.31
DYSF	MAPK1	936	65	933	705	710	0.448	14.81	13.13	9.96	13.16	11.29	11.83	11.88	12.58	13.26	12.31
CHST15	MAPK14	934	911	655	979	407	0.368	13.55	13.60	10.43	10.66	10.27	12.04	11.18	11.84	10.36	11.35
CYSTM1	MAPK14	984	310	950	772	661	0.526	13.01	13.60	10.56	10.66	10.17	12.04	11.46	11.84	12.44	11.35
ETV6	MAPK14	903	719	936	583	508	0.450	12.27	13.60	8.78	10.66	10.00	12.04	11.12	11.84	9.53	11.35
IKZF1	MAPRE2	857	326	703	686	244	0.519	12.91	11.44	4.65	12.99	7.92	10.78	10.14	11.24	6.36	11.73
ARHGEF11	MARC1	985	526	299	809	491	0.802	11.85	11.50	12.40	8.34	11.19	11.33	11.69	8.39	11.19	8.33
ASAH1	MARC1	966	846	25	944	735	0.419	13.59	11.50	11.48	8.34	11.36	11.33	13.46	8.39	11.86	8.33
CHST15	MARC1	822	473	121	688	29	0.550	13.55	11.50	10.43	8.34	10.27	11.33	11.18	8.39	10.36	8.33
DNTTIP1	MARC1	967	753	83	870	563	0.591	11.51	11.50	8.97	8.34	8.97	11.33	9.33	8.39	10.64	8.33
DYSF	MARC1	964	124	13	552	301	0.902	14.81	11.50	9.96	8.34	11.29	11.33	11.88	8.39	13.26	8.33
ENTPD1	MARC1	990	811	367	285	478	0.825	12.63	11.50	10.25	8.34	9.37	11.33	11.59	8.39	9.95	8.33
GLIPR2	MARC1	982	182	66	291	697	0.866	13.44	11.50	8.00	8.34	7.51	11.33	11.39	8.39	8.06	8.33
GYG1	MARC1	971	801	18	669	272	0.707	13.35	11.50	10.41	8.34	9.30	11.33	11.04	8.39	14.29	8.33
IL17RA	MARC1	993	376	48	824	217	0.824	13.86	11.50	8.86	8.34	10.17	11.33	11.36	8.39	8.63	8.33
KIF13A	MARC1	924	630	513	565	789	0.600	11.00	11.50	10.69	8.34	10.62	11.33	11.54	8.39	12.65	8.33
LAMP2	MARC1	981	459	132	767	563	0.797	13.34	11.50	11.78	8.34	12.69	11.33	12.37	8.39	12.70	8.33
LILRB3	MARC1	936	44	24	559	83	0.843	12.42	11.50	2.23	8.34	5.95	11.33	7.77	8.39	4.65	8.33
LST1	MARC1	828	170	215	369	396	0.656	12.78	11.50	4.75	8.34	7.21	11.33	8.89	8.39	5.02	8.33
MAP2K6	MARC1	991	465	735	813	130	0.708	10.38	11.50	5.53	8.34	6.68	11.33	5.17	8.39	10.25	8.33
MAPK14	MARC1	990	608	103	808	700	0.672	13.60	11.50	10.66	8.34	12.04	11.33	11.84	8.39	11.35	8.33
ABCC3	MARCH2	489	366	800	730	561	0.000	10.18	12.36	5.37	11.62	14.13	10.73	11.09	10.42	5.97	11.18
C1orf198	MARCH2	268	266	467	564	150	0.000	8.35	12.36	11.86	11.62	10.07	10.73	12.70	10.42	12.61	11.18
CLDN5	MARCH2	738	230	418	536	772	0.339	8.86	12.36	11.66	11.62	8.57	10.73	13.95	10.42	11.16	11.18
CLU	MARCH2	800	291	442	633	659	0.454	12.76	12.36	18.59	11.62	16.43	10.73	14.68	10.42	10.77	11.18
FAXDC2	MARCH2	454	259	161	669	630	0.000	11.01	12.36	10.92	11.62	12.04	10.73	11.36	10.42	9.41	11.18
GP9	MARCH2	880	108	96	505	47	0.757	9.83	12.36	0.70	11.62	2.13	10.73	4.51	10.42	1.50	11.18
HK1	MARCH2	614	753	485	828	438	0.114	12.83	12.36	13.57	11.62	9.23	10.73	12.57	10.42	13.74	11.18
ITGB5	MARCH2	768	299	834	863	731	0.152	9.80	12.36	10.23	11.62	12.45	10.73	12.66	10.42	11.23	11.18
CREBRF	MARCH5	986	905	829	889	898	0.211	12.18	10.91	9.91	9.81	10.51	10.67	11.17	10.33	10.55	10.95
FAM210B	MARCH8	867	657	881	996	801	0.138	12.79	12.65	10.77	10.23	11.95	10.96	10.67	10.22	12.00	10.19
ACSL1	MARCKS	879	282	86	173	1	0.758	16.81	12.70	10.48	12.54	15.79	10.14	14.09	12.28	15.03	9.26
BRI3	MARCKS	757	749	597	288	73	0.341	12.91	12.70	10.15	12.54	11.99	10.14	12.37	12.28	12.16	9.26
CEBPB	MARCKS	873	209	375	315	17	0.746	13.99	12.70	9.38	12.54	13.22	10.14	12.98	12.28	12.77	9.26
ABCA7	MARS	842	960	817	518	797	0.197	13.67	12.34	10.22	12.40	9.44	11.76	11.22	12.31	10.16	11.72
DPH7	MARS	716	862	425	711	958	0.111	10.08	12.34	10.19	12.40	10.24	11.76	10.09	12.31	9.80	11.72
EZH1	MARS	999	948	193	378	931	0.558	12.53	12.34	12.30	12.40	10.59	11.76	11.92	12.31	12.18	11.72
ARID3B	MAST3	965	126	889	899	418	0.536	11.68	13.15	6.82	13.48	8.35	10.84	9.26	10.19	8.43	8.39
LPXN	MAT2A	566	834	345	515	517	0.083	11.68	11.37	7.10	13.00	8.89	12.55	9.82	13.69	7.67	13.54
MAP3K4	MAT2A	681	915	637	666	398	0.120	9.81	11.37	10.19	13.00	9.81	12.55	10.14	13.69	10.83	13.54
CHST12	MATK	1000	660	749	753	338	0.669	10.06	10.96	8.52	11.41	8.20	6.72	9.17	8.27	8.69	4.03
GPR56	MATK	1000	430	701	174	412	0.899	11.55	10.96	13.08	11.41	8.34	6.72	11.86	8.27	10.02	4.03
MARS	MAU2	992	891	618	644	788	0.513	12.34	12.30	12.40	11.31	11.76	11.09	12.31	11.49	11.72	12.25
INTS6	MBNL1	957	989	847	870	796	0.179	10.62	12.58	8.82	10.75	10.53	11.77	9.51	13.14	9.57	13.81
ARHGEF40	MBOAT7	978	17	211	615	950	0.673	12.31	14.52	10.53	12.75	12.32	10.92	11.68	11.25	10.77	9.25
CEBPD	MBOAT7	980	240	881	717	608	0.607	13.21	14.52	9.66	12.75	13.12	10.92	13.24	11.25	12.06	9.25
DENND3	MBOAT7	957	823	888	599	639	0.440	14.35	14.52	11.74	12.75	9.20	10.92	13.24	11.25	10.45	9.25
FCGRT	MBOAT7	993	49	448	638	960	0.687	13.82	14.52	9.79	12.75	13.71	10.92	13.32	11.25	11.02	9.25
GAB2	MBOAT7	849	220	814	595	588	0.450	12.95	14.52	11.48	12.75	8.53	10.92	11.88	11.25	9.64	9.25
DAP3	MBTPS1	993	984	997	960	959	0.038	11.37	11.20	10.48	11.73	11.52	11.75	11.07	12.16	12.05	11.19
ANKRD10	MCCC1	867	833	112	62	226	0.568	11.48	9.07	11.54	10.06	12.09	11.22	12.48	10.07	12.90	10.32
ARHGEF6	MCCC1	887	605	620	147	425	0.661	11.94	9.07	10.49	10.06	8.77	11.22	11.28	10.07	11.80	10.32
BMS1	MCCC1	997	951	561	718	762	0.498	10.14	9.07	10.39	10.06	10.60	11.22	10.80	10.07	11.65	10.32
C2CD2	MCCC1	986	751	495	453	387	0.847	8.35	9.07	10.60	10.06	9.97	11.22	10.04	10.07	8.76	10.32
DHX33	MCCC1	929	974	633	736	488	0.459	8.76	9.07	9.66	10.06	10.04	11.22	9.26	10.07	10.12	10.32
KIAA0020	MCCC1	992	846	343	466	379	0.811	8.96	9.07	7.15	10.06	9.72	11.22	9.89	10.07	9.38	10.32
ACSL5	MCM3	973	506	834	912	982	0.334	10.94	10.58	8.33	9.46	12.76	10.04	11.40	10.84	8.25	10.14
C16orf58	MCM3	993	718	574	916	991	0.387	10.36	10.58	11.02	9.46	11.83	10.04	10.83	10.84	9.43	10.14
C21orf33	MCM3	834	729	827	965	543	0.202	11.06	10.58	11.96	9.46	13.57	10.04	11.08	10.84	12.80	10.14
COG4	MCM3	690	800	932	887	853	0.000	11.30	10.58	10.82	9.46	11.18	10.04	10.69	10.84	11.78	10.14
ECH1	MCM3	938	871	626	872	494	0.442	11.95	10.58	11.47	9.46	13.88	10.04	11.96	10.84	13.95	10.14
GCDH	MCM3	963	818	156	883	685	0.483	9.95	10.58	9.16	9.46	12.05	10.04	8.73	10.84	10.20	10.14
GLT8D1	MCM3	723	851	804	926	957	0.000	10.07	10.58	10.11	9.46	11.06	10.04	10.36	10.84	9.78	10.14
HADH	MCM3	993	823	233	892	190	0.628	9.31	10.58	9.88	9.46	12.92	10.04	10.15	10.84	12.83	10.14
IARS	MCM3AP	975	965	958	843	941	0.097	10.56	11.28	11.80	11.00	11.80	10.98	12.11	11.51	12.66	12.19
ABCC10	MCM7	879	549	925	961	931	0.165	10.37	11.47	10.09	10.70	9.24	10.82	9.84	11.13	9.41	11.34
AP1G2	MCM7	877	290	809	966	910	0.223	11.36	11.47	10.84	10.70	9.27	10.82	9.95	11.13	7.34	11.34
C16orf80	MCM7	904	220	877	963	442	0.417	9.28	11.47	10.04	10.70	9.73	10.82	8.98	11.13	8.51	11.34
C21orf33	MCM7	771	509	773	954	18	0.267	11.06	11.47	11.96	10.70	13.57	10.82	11.08	11.13	12.80	11.34
ENTPD1	MCMBP	998	898	696	611	834	0.476	12.63	11.67	10.25	9.44	9.37	10.35	11.59	11.25	9.95	11.14
LEO1	MDC1	682	841	760	879	418	0.091	8.82	10.23	8.93	10.34	9.72	10.92	8.23	10.98	9.22	10.83
DCP1B	MDH1	928	871	535	925	21	0.441	8.90	10.88	7.35	14.16	8.68	12.44	8.21	11.27	9.08	13.37
ANXA4	MDH2	881	203	815	966	417	0.414	10.66	11.86	8.89	12.80	12.12	13.52	11.82	12.09	9.84	14.66
ARHGAP17	MDH2	942	264	876	512	732	0.574	10.30	11.86	8.56	12.80	9.51	13.52	10.59	12.09	10.67	14.66
CHST14	MDH2	976	20	873	908	486	0.561	8.92	11.86	6.61	12.80	8.73	13.52	9.34	12.09	8.12	14.66
CMTM7	MDH2	891	58	872	977	258	0.401	11.80	11.86	4.61	12.80	7.65	13.52	10.12	12.09	7.08	14.66
CTSC	MDH2	746	514	943	980	502	0.238	12.74	11.86	6.93	12.80	10.18	13.52	12.96	12.09	9.13	14.66
DCP1B	MDH2	927	900	122	867	422	0.470	8.90	11.86	7.35	12.80	8.68	13.52	8.21	12.09	9.08	14.66
LY86	MDH2	808	250	851	745	148	0.340	10.62	11.86	4.56	12.80	5.22	13.52	7.42	12.09	3.28	14.66
AAK1	MDN1	974	698	151	590	792	0.658	9.20	9.98	12.16	11.79	7.27	12.26	7.95	11.33	9.38	11.90
ARHGEF9	MDN1	992	667	786	789	760	0.483	9.21	9.98	13.15	11.79	8.97	12.26	9.44	11.33	8.78	11.90
KLHL8	ME2	951	858	881	925	273	0.320	10.38	11.29	8.27	9.98	9.45	9.29	8.66	9.75	10.75	11.24
DHRS4-AS1	MEAF6	991	702	37	965	913	0.442	8.44	10.56	8.64	10.98	10.59	10.22	7.95	10.44	8.48	10.78
FAM208A	MEAF6	860	886	839	989	995	0.011	10.60	10.56	10.41	10.98	10.20	10.22	10.81	10.44	9.96	10.78
ABHD2	MED13L	873	933	790	914	545	0.205	12.85	11.75	11.72	11.17	13.66	10.89	12.41	12.34	11.64	12.11
ACTR8	MED17	839	927	889	990	970	0.000	9.63	10.07	8.79	9.09	8.80	9.18	8.73	9.23	9.29	9.63
C2orf42	MED24	774	919	783	78	887	0.137	9.24	10.83	8.40	11.91	9.24	11.37	7.27	11.97	8.42	12.63
GCDH	MED24	989	504	468	225	733	0.860	9.95	10.83	9.16	11.91	12.05	11.37	8.73	11.97	10.20	12.63
LRRC8D	MEF2C	988	762	476	194	4	0.845	10.32	9.94	9.91	13.20	10.24	8.38	8.33	10.55	9.32	13.17
ANGPTL4	MEG3	680	58	692	139	81	0.270	6.89	8.33	9.56	16.21	12.55	12.30	9.98	12.07	9.43	12.26
BIRC7	MEG3	101	157	96	130	47	0.000	3.02	8.33	1.92	16.21	1.21	12.30	3.52	12.07	1.53	12.26
CFB	MEG3	566	106	308	75	852	0.099	6.78	8.33	7.18	16.21	16.43	12.30	11.30	12.07	7.74	12.26
DUOXA2	MEG3	101	108	96	62	47	0.000	0.91	8.33	0.45	16.21	2.12	12.30	3.80	12.07	0.83	12.26
ENDOV	MEG3	220	944	646	187	629	0.000	8.60	8.33	9.76	16.21	9.45	12.30	8.84	12.07	9.51	12.26
GLP1R	MEG3	101	246	96	319	47	0.000	2.93	8.33	2.24	16.21	0.54	12.30	2.92	12.07	0.91	12.26
HAP1	MEG3	101	278	411	647	708	0.000	3.18	8.33	9.73	16.21	4.37	12.30	4.95	12.07	4.39	12.26
HCN2	MEG3	564	611	434	141	371	0.096	6.53	8.33	12.68	16.21	4.04	12.30	3.18	12.07	3.84	12.26
HR	MEG3	487	771	637	625	527	0.000	4.43	8.33	11.76	16.21	5.79	12.30	6.17	12.07	7.15	12.26
KCNIP3	MEG3	101	625	697	328	698	0.000	3.26	8.33	11.83	16.21	6.96	12.30	6.56	12.07	6.83	12.26
ADM	MEGF9	457	230	51	97	539	0.000	12.97	12.99	7.41	11.56	10.45	11.59	12.16	11.56	10.85	9.89
ARHGEF11	MEGF9	994	764	852	736	953	0.336	11.85	12.99	12.40	11.56	11.19	11.59	11.69	11.56	11.19	9.89
ASAP1	MEGF9	801	962	449	561	799	0.272	12.51	12.99	11.04	11.56	9.80	11.59	12.25	11.56	10.57	9.89
ATG7	MEGF9	925	923	874	789	906	0.104	11.17	12.99	9.64	11.56	8.51	11.59	9.40	11.56	9.34	9.89
ATP6V1B2	MEGF9	992	792	904	854	924	0.247	13.91	12.99	13.89	11.56	11.51	11.59	12.98	11.56	12.08	9.89
BASP1	MEGF9	969	689	355	222	458	0.844	14.45	12.99	14.01	11.56	8.06	11.59	10.34	11.56	6.68	9.89
CHST15	MEGF9	961	771	415	697	316	0.688	13.55	12.99	10.43	11.56	10.27	11.59	11.18	11.56	10.36	9.89
CRISPLD2	MEGF9	997	264	181	383	287	0.994	12.06	12.99	7.70	11.56	9.54	11.59	13.48	11.56	10.43	9.89
DNTTIP1	MEGF9	978	878	720	942	758	0.307	11.51	12.99	8.97	11.56	8.97	11.59	9.33	11.56	10.64	9.89
CSRP2BP	MESDC2	990	802	704	799	796	0.429	8.64	10.27	9.76	9.79	9.19	11.10	8.13	10.71	10.56	9.46
DHRS4-AS1	MESDC2	991	824	129	740	980	0.460	8.44	10.27	8.64	9.79	10.59	11.10	7.95	10.71	8.48	9.46
LBH	MESDC2	892	371	423	598	760	0.605	10.01	10.27	6.27	9.79	7.61	11.10	11.41	10.71	8.17	9.46
LIX1L	METAP1	921	425	979	694	683	0.443	10.66	9.99	9.23	9.62	9.64	10.35	10.37	9.98	11.30	10.93
LPXN	METAP1	977	651	806	863	804	0.392	11.68	9.99	7.10	9.62	8.89	10.35	9.82	9.98	7.67	10.93
ICAM2	METTL13	551	65	887	527	255	0.063	10.62	9.97	6.48	9.59	6.26	9.89	9.55	9.38	8.59	10.30
API5	METTL14	1000	986	976	999	999	0.020	10.80	9.27	11.19	8.64	11.76	9.85	11.29	8.95	11.46	9.23
C3orf17	METTL14	993	998	969	994	993	0.012	10.37	9.27	10.11	8.64	10.14	9.85	10.19	8.95	11.21	9.23
CCT2	METTL14	937	896	715	812	946	0.194	10.71	9.27	11.58	8.64	11.20	9.85	11.54	8.95	12.17	9.23
FYTTD1	METTL14	942	960	799	869	843	0.158	10.45	9.27	10.47	8.64	10.86	9.85	11.14	8.95	12.68	9.23
MAK16	METTL14	995	904	768	845	930	0.267	8.40	9.27	8.02	8.64	8.81	9.85	8.31	8.95	9.50	9.23
ARHGEF9	METTL17	990	449	945	929	802	0.392	9.21	10.27	13.15	9.65	8.97	11.20	9.44	10.73	8.78	10.52
CCDC132	METTL17	818	753	957	943	957	0.033	9.03	10.27	10.28	9.65	9.11	11.20	9.04	10.73	10.08	10.52
DCUN1D4	METTL17	959	911	979	865	966	0.071	8.93	10.27	10.70	9.65	11.59	11.20	10.45	10.73	10.59	10.52
DNAJC2	METTL17	987	858	630	821	741	0.449	9.07	10.27	8.82	9.65	9.59	11.20	9.29	10.73	10.55	10.52
FASTKD2	METTL17	922	846	462	821	774	0.373	9.17	10.27	8.47	9.65	10.04	11.20	9.30	10.73	11.07	10.52
GTF2H1	METTL17	838	788	717	929	836	0.086	10.05	10.27	9.98	9.65	9.96	11.20	9.84	10.73	10.18	10.52
KIAA0020	METTL17	986	829	577	570	676	0.646	8.96	10.27	7.15	9.65	9.72	11.20	9.89	10.73	9.38	10.52
LTV1	METTL17	856	947	496	735	825	0.254	9.15	10.27	8.70	9.65	9.93	11.20	9.76	10.73	10.58	10.52
EIF4A2	METTL23	961	779	956	901	881	0.164	12.09	10.07	14.85	7.88	13.40	9.67	14.05	9.01	14.63	9.47
IQCB1	METTL23	984	963	943	892	967	0.086	9.77	10.07	8.95	7.88	8.98	9.67	9.54	9.01	9.50	9.47
MEAF6	METTL23	993	833	919	977	976	0.134	10.56	10.07	10.98	7.88	10.22	9.67	10.44	9.01	10.78	9.47
FASTKD1	METTL25	941	796	783	958	620	0.312	8.34	8.16	9.17	5.31	9.59	7.11	8.48	6.25	9.45	7.98
KIAA0020	METTL3	976	862	677	634	974	0.379	8.96	10.39	7.15	10.17	9.72	10.39	9.89	11.06	9.38	10.71
MEG3	MEX3A	0	275	172	529	685	0.000	8.33	3.60	16.21	5.20	12.30	7.30	12.07	5.00	12.26	3.75
G3BP1	MFSD6	973	349	923	664	793	0.506	11.25	9.53	10.66	11.69	12.29	7.46	12.48	10.86	12.76	8.85
AFG3L1P	MFSD8	989	914	825	965	978	0.137	9.68	8.89	9.63	8.65	10.10	9.71	9.80	9.05	9.89	9.01
ASB1	MFSD8	972	731	196	936	901	0.410	10.59	8.89	11.20	8.65	10.02	9.71	10.28	9.05	11.55	9.01
EIF2B4	MFSD8	783	869	693	936	856	0.045	10.20	8.89	9.95	8.65	10.36	9.71	10.13	9.05	11.09	9.01
EIF2B5	MFSD8	827	868	627	890	972	0.100	10.83	8.89	11.11	8.65	11.21	9.71	11.16	9.05	11.89	9.01
KIAA0020	MFSD8	888	802	446	503	721	0.513	8.96	8.89	7.15	8.65	9.72	9.71	9.89	9.05	9.38	9.01
DNTTIP1	MGAT1	943	934	976	997	795	0.079	11.51	13.94	8.97	11.62	8.97	13.39	9.33	13.52	10.64	11.87
ABLIM1	MGAT4A	896	700	686	843	661	0.347	11.00	10.97	13.27	10.12	12.16	9.59	13.05	11.20	13.22	9.32
ANKRD46	MGAT4A	986	968	721	806	490	0.474	7.77	10.97	10.73	10.12	10.25	9.59	8.45	11.20	10.73	9.32
ALG9	MGC27345	0	0	0	0	0	0.000	9.06	0.00	9.34	0.00	9.90	0.00	9.63	0.00	9.64	0.00
AP3M1	MGC27345	0	0	0	0	0	0.000	10.63	0.00	9.27	0.00	10.50	0.00	10.35	0.00	10.31	0.00
CROT	MGC27345	0	0	0	0	0	0.000	7.98	0.00	8.24	0.00	9.97	0.00	8.17	0.00	9.40	0.00
DDHD2	MGC27345	0	0	0	0	0	0.000	9.57	0.00	11.79	0.00	9.56	0.00	10.54	0.00	10.54	0.00
DIEXF	MGC27345	0	0	0	0	0	0.000	9.01	0.00	8.79	0.00	9.61	0.00	8.34	0.00	9.23	0.00
DNAJA3	MGC27345	0	0	0	0	0	0.000	9.88	0.00	10.89	0.00	12.24	0.00	10.27	0.00	12.35	0.00
EHBP1	MGC27345	0	0	0	0	0	0.000	8.41	0.00	11.16	0.00	11.25	0.00	9.69	0.00	9.81	0.00
HEATR5B	MGC27345	0	0	0	0	0	0.000	10.33	0.00	10.31	0.00	10.55	0.00	10.65	0.00	9.73	0.00
HMG20A	MGC27345	0	0	0	0	0	0.000	10.02	0.00	10.51	0.00	10.82	0.00	10.45	0.00	11.08	0.00
GNAZ	MGLL	810	725	409	687	678	0.325	8.47	10.15	11.65	14.04	4.83	13.53	5.87	13.03	7.02	11.99
ATG7	MGST1	916	89	887	815	745	0.358	11.17	10.34	9.64	10.59	8.51	14.97	9.40	11.93	9.34	8.75
C10orf11	MGST1	806	623	618	353	198	0.491	7.98	10.34	4.39	10.59	7.66	14.97	6.46	11.93	6.24	8.75
COMMD9	MGST1	893	54	968	945	68	0.393	10.97	10.34	10.29	10.59	9.99	14.97	9.44	11.93	10.47	8.75
EVI5	MGST1	869	197	808	575	791	0.401	8.88	10.34	9.11	10.59	10.32	14.97	9.77	11.93	9.00	8.75
LGALS1	MGST1	801	261	550	186	258	0.577	12.94	10.34	11.92	10.59	11.12	14.97	13.42	11.93	12.98	8.75
AOAH	MGST2	772	536	565	451	482	0.493	12.91	9.68	4.85	7.45	7.34	11.74	8.81	9.31	4.97	9.67
C1orf162	MGST2	952	748	563	922	178	0.537	13.64	9.68	7.02	7.45	8.88	11.74	10.81	9.31	8.91	9.67
EIF4EBP1	MGST2	790	663	576	812	18	0.316	10.27	9.68	5.74	7.45	10.68	11.74	9.06	9.31	10.77	9.67
FIG4	MGST2	982	633	880	990	408	0.467	10.65	9.68	10.34	7.45	8.52	11.74	9.46	9.31	9.66	9.67
BTN2A2	MIA3	834	269	733	272	705	0.449	9.71	11.08	6.53	10.87	8.15	12.05	9.79	11.08	7.49	11.23
BLVRB	MICAL2	504	316	645	740	590	0.002	12.84	11.00	9.31	12.97	12.20	8.85	11.05	10.19	11.62	10.66
CYBRD1	MICAL2	612	1	338	253	399	0.224	10.73	11.00	10.79	12.97	9.89	8.85	13.57	10.19	11.05	10.66
FAM210B	MICAL2	530	474	709	553	37	0.030	12.79	11.00	10.77	12.97	11.95	8.85	10.67	10.19	12.00	10.66
C19orf66	MICALL1	864	304	592	685	342	0.590	10.74	10.11	10.46	8.36	12.95	9.45	10.18	10.38	7.86	10.08
ANO10	MICU1	989	961	457	995	865	0.321	11.23	11.89	9.52	11.75	8.98	11.68	9.80	10.82	9.44	11.83
C10orf54	MICU1	970	14	95	896	676	0.654	16.77	11.89	10.76	11.75	9.18	11.68	12.82	10.82	10.07	11.83
CECR1	MICU1	460	112	622	855	771	0.000	12.68	11.89	8.62	11.75	8.51	11.68	11.37	10.82	8.12	11.83
COLGALT1	MICU1	990	746	230	874	648	0.596	12.94	11.89	10.47	11.75	11.53	11.68	12.70	10.82	10.77	11.83
DENND1A	MICU1	879	977	825	888	507	0.213	11.31	11.89	11.33	11.75	10.18	11.68	9.45	10.82	10.30	11.83
FKBP15	MICU1	993	897	656	912	688	0.409	12.58	11.89	10.52	11.75	10.83	11.68	11.80	10.82	10.90	11.83
LILRB3	MICU1	954	60	65	577	325	0.870	12.42	11.89	2.23	11.75	5.95	11.68	7.77	10.82	4.65	11.83
MCMBP	MICU1	986	637	312	991	618	0.602	11.67	11.89	9.44	11.75	10.35	11.68	11.25	10.82	11.14	11.83
FXYD5	MIF	445	141	90	578	503	0.000	13.57	4.69	7.37	4.51	8.87	5.07	11.78	3.13	9.03	4.00
LIME1	MIF	480	828	363	457	567	0.000	11.54	4.69	10.12	4.51	12.67	5.07	8.81	3.13	8.56	4.00
CCDC86	MIF4GD	964	472	927	465	965	0.482	8.66	10.68	8.09	7.88	8.38	8.67	7.98	9.22	9.88	10.52
ENDOG	MIF4GD	886	367	699	876	341	0.484	7.31	10.68	7.00	7.88	8.46	8.67	5.53	9.22	9.78	10.52
IMP3	MIF4GD	967	444	957	908	918	0.292	9.89	10.68	10.11	7.88	10.89	8.67	9.50	9.22	10.50	10.52
AP2M1	MIIP	909	500	907	959	939	0.205	13.46	12.08	14.96	9.53	12.91	10.00	13.65	10.23	12.83	10.19
ATP6V0C	MIIP	693	526	796	914	927	0.084	14.12	12.08	14.26	9.53	12.30	10.00	12.91	10.23	12.61	10.19
KDM4C	MINA	825	743	941	962	944	0.041	10.56	8.48	9.65	8.43	9.97	9.16	10.11	8.62	9.86	10.46
FTH1	MIR22HG	326	371	752	308	315	0.000	16.31	9.97	14.61	8.72	13.61	10.49	15.37	11.20	13.66	10.52
AAK1	MIR568	0	47	256	597	165	0.000	9.20	1.01	12.16	1.40	7.27	2.42	7.95	1.64	9.38	3.62
ANKRD46	MIS12	999	662	401	975	609	0.625	7.77	9.32	10.73	8.56	10.25	9.75	8.45	9.17	10.73	9.73
KIAA1147	MIS12	926	892	749	574	849	0.320	9.94	9.32	11.56	8.56	11.46	9.75	11.50	9.17	10.07	9.73
JRKL	MKKS	862	869	547	997	859	0.159	7.77	9.78	7.26	11.24	8.17	10.85	8.07	9.60	8.48	10.80
ABCE1	MKL2	947	898	742	320	672	0.488	9.41	7.30	9.86	11.31	10.65	9.07	10.36	11.04	11.08	10.53
ARHGEF18	MKL2	614	771	809	465	887	0.057	12.04	7.30	11.03	11.31	10.60	9.07	11.09	11.04	9.41	10.53
DIEXF	MKL2	855	980	787	161	866	0.211	9.01	7.30	8.79	11.31	9.61	9.07	8.34	11.04	9.23	10.53
LINS	MKL2	863	736	633	278	780	0.402	9.88	7.30	7.88	11.31	8.50	9.07	8.34	11.04	8.67	10.53
MGC27345	MKL2	101	108	96	50	47	0.000	0.00	7.30	0.00	11.31	0.00	9.07	0.00	11.04	0.00	10.53
MAFF	MLF2	29	267	590	474	312	0.000	10.33	12.91	8.34	13.65	9.34	13.45	11.63	12.42	11.37	12.51
GLB1	MLLT1	849	616	891	685	571	0.338	11.23	11.14	9.16	10.63	10.86	9.45	10.65	9.99	8.96	10.19
DPH5	MLLT11	778	736	790	398	553	0.273	8.50	10.21	7.02	12.67	8.34	7.40	7.33	8.07	9.11	9.48
HADH	MLLT11	351	527	146	380	173	0.000	9.31	10.21	9.88	12.67	12.92	7.40	10.15	8.07	12.83	9.48
IFT80	MLLT11	795	671	817	396	542	0.336	8.23	10.21	10.86	12.67	9.40	7.40	9.83	8.07	8.70	9.48
IMPDH2	MLLT11	203	663	613	616	176	0.000	11.18	10.21	10.71	12.67	11.16	7.40	12.01	8.07	12.98	9.48
METTL23	MLLT11	616	654	783	519	526	0.093	10.07	10.21	7.88	12.67	9.67	7.40	9.01	8.07	9.47	9.48
ADAP2	MLX	801	352	877	917	646	0.228	10.25	11.83	5.86	9.40	7.47	11.13	8.65	10.65	6.87	11.53
ARHGAP26	MLX	963	994	620	314	683	0.543	13.29	11.83	11.84	9.40	9.41	11.13	11.19	10.65	10.63	11.53
C10orf54	MLX	975	100	935	881	618	0.483	16.77	11.83	10.76	9.40	9.18	11.13	12.82	10.65	10.07	11.53
ENTPD1	MLX	989	902	733	483	886	0.468	12.63	11.83	10.25	9.40	9.37	11.13	11.59	10.65	9.95	11.53
FCGRT	MLX	962	96	220	905	617	0.663	13.82	11.83	9.79	9.40	13.71	11.13	13.32	10.65	11.02	11.53
DDX56	MLYCD	806	860	718	646	589	0.233	11.45	9.05	11.12	7.94	11.79	11.06	11.39	8.05	11.28	11.65
CA2	MMD	360	318	354	361	92	0.000	10.29	9.49	10.88	10.49	12.01	8.76	9.30	9.36	10.45	8.19
C10orf10	MMP14	542	733	679	310	976	0.021	9.58	8.77	10.57	7.38	12.35	10.08	14.61	13.55	12.39	10.50
CHDH	MMP14	327	592	158	527	82	0.000	6.05	8.77	10.17	7.38	12.42	10.08	7.98	13.55	9.09	10.50
LRP3	MMP14	398	69	406	845	238	0.000	9.51	8.77	12.36	7.38	11.46	10.08	9.41	13.55	10.56	10.50
ENOSF1	MMS19	933	438	761	959	838	0.350	8.76	11.38	8.48	11.69	11.94	10.78	10.47	11.59	9.61	11.43
LAS1L	MMS19	997	979	994	979	986	0.025	10.28	11.38	12.01	11.69	10.31	10.78	10.41	11.59	10.52	11.43
CCDC109B	MOAP1	960	473	817	708	644	0.586	10.24	10.26	5.46	13.04	6.05	9.88	8.12	10.41	6.87	11.25
KRT10	MOAP1	673	159	829	652	642	0.113	9.97	10.26	9.25	13.04	9.78	9.88	9.10	10.41	9.78	11.25
CD79A	MOB3B	638	195	323	325	154	0.276	11.51	8.14	1.87	9.08	5.22	7.24	6.01	9.39	3.79	9.62
LINC00926	MOB3B	729	862	399	772	376	0.229	10.82	8.14	5.63	9.08	7.31	7.24	7.54	9.39	6.86	9.62
HARS2	MON2	968	1000	950	989	935	0.025	10.56	10.55	10.12	10.88	10.07	11.72	9.99	11.37	10.74	10.62
ALDH18A1	MORC2	975	962	717	872	817	0.266	9.40	10.15	9.84	9.73	10.83	10.55	9.86	10.09	8.65	11.03
ATP5A1	MORC2	940	840	593	926	42	0.451	12.98	10.15	14.59	9.73	14.03	10.55	13.65	10.09	15.13	11.03
DZIP3	MORC2	929	918	570	798	41	0.465	8.54	10.15	11.43	9.73	8.44	10.55	8.85	10.09	9.96	11.03
GCDH	MORC2	975	515	231	879	518	0.744	9.95	10.15	9.16	9.73	12.05	10.55	8.73	10.09	10.20	11.03
HADH	MORC2	971	786	141	904	100	0.597	9.31	10.15	9.88	9.73	12.92	10.55	10.15	10.09	12.83	11.03
IARS	MORC2	985	919	842	806	956	0.208	10.56	10.15	11.80	9.73	11.80	10.55	12.11	10.09	12.66	11.03
ICAM2	MORC2	926	426	582	779	406	0.671	10.62	10.15	6.48	9.73	6.26	10.55	9.55	10.09	8.59	11.03
IMMT	MORC2	989	905	827	969	474	0.378	11.31	10.15	11.52	9.73	11.85	10.55	11.27	10.09	13.18	11.03
LAT	MORC2	975	691	479	800	529	0.690	11.14	10.15	7.69	9.73	8.32	10.55	8.92	10.09	6.97	11.03
LDHB	MORC2	992	723	708	859	76	0.589	12.28	10.15	14.91	9.73	9.67	10.55	13.24	10.09	12.69	11.03
ARHGEF37	MORN1	69	168	307	663	364	0.000	7.59	6.21	10.09	7.10	7.97	6.72	8.61	6.02	10.94	6.77
FAU	MPC2	869	409	898	948	658	0.290	13.29	9.96	12.54	10.96	13.32	12.34	13.37	9.22	13.35	11.48
ABHD10	MPHOSPH10	999	997	617	921	219	0.480	9.39	9.14	10.13	9.53	10.64	10.22	8.78	9.59	9.44	10.88
ADD3	MPHOSPH10	948	482	667	342	546	0.789	12.07	9.14	13.29	9.53	10.02	10.22	12.02	9.59	9.87	10.88
BLCAP	MPHOSPH10	992	937	534	946	766	0.393	10.88	9.14	12.78	9.53	12.32	10.22	11.10	9.59	14.05	10.88
COQ10A	MPHOSPH10	625	885	71	929	9	0.125	8.44	9.14	8.75	9.53	9.96	10.22	7.45	9.59	11.56	10.88
COX18	MPHOSPH10	986	970	883	721	463	0.435	8.86	9.14	7.89	9.53	9.50	10.22	8.30	9.59	8.77	10.88
DCTD	MPHOSPH10	828	919	933	989	983	0.000	10.49	9.14	10.90	9.53	11.61	10.22	10.97	9.59	10.60	10.88
DDHD2	MPHOSPH10	870	986	908	882	772	0.049	9.57	9.14	11.79	9.53	9.56	10.22	10.54	9.59	10.54	10.88
DIS3L	MPHOSPH10	958	945	827	984	594	0.254	9.52	9.14	10.21	9.53	9.94	10.22	9.15	9.59	11.13	10.88
ECI2	MPHOSPH10	815	467	490	958	227	0.472	9.22	9.14	9.65	9.53	12.22	10.22	9.26	9.59	11.86	10.88
HMG20A	MPHOSPH10	977	988	852	887	851	0.171	10.02	9.14	10.51	9.53	10.82	10.22	10.45	9.59	11.08	10.88
INSIG2	MPHOSPH10	823	973	559	929	751	0.168	9.72	9.14	9.57	9.53	10.99	10.22	9.92	9.59	9.38	10.88
KLHDC2	MPHOSPH10	981	996	629	760	851	0.351	10.24	9.14	11.19	9.53	11.89	10.22	10.48	9.59	11.83	10.88
LPIN1	MPHOSPH10	619	928	733	674	888	0.000	10.30	9.14	11.59	9.53	11.81	10.22	11.38	9.59	14.13	10.88
[truncated: 6,477 more rows]
