# Supplementary material for: Differential coexpression in human tissues and the confounding effect of mean expression levels
Source: Bioinformatics. 2018 Jul 3;35(1):55–61. doi: 10.1093/bioinformatics/bty538 (PMC6298061; doi:10.1093/bioinformatics/bty538)
Supplement: Supplementary Data [file bty538_suppl_data.zip › TSlinksTSS_brain_cortex_pureLinks_GTEx_exp.csv]

gene_A	gene_B	blood_corr	brain_cortex_corr	liver_corr	lung_corr	skeletalMuscle_corr	GTExTSS	gA_bloodExp	gB_bloodExp	gA_brainExp	gB_brainExp	gA_liverExp	gB_liverExp	gA_lungExp	gB_lungExp	gA_muscleExp	gB_muscleExp
AAK1	ABHD14A	664	915	613	63	9	0.692	9.20	8.84	12.16	10.56	7.27	8.95	7.95	7.80	9.38	9.20
AASDHPPT	ABHD16A	807	904	901	970	864	0.070	9.13	12.08	10.72	10.78	10.05	11.23	8.97	10.70	10.52	10.93
ABR	ACP1	252	969	742	946	690	0.499	12.54	10.60	15.13	11.17	9.16	11.47	13.01	10.94	10.48	11.32
ABHD17B	ACSL1	451	984	876	511	610	0.720	9.68	16.81	9.66	10.48	9.41	15.79	8.82	14.09	9.84	15.03
ABHD14A	ACTR1A	484	974	736	807	96	0.676	8.84	12.69	10.56	13.19	8.95	11.53	7.80	12.55	9.20	13.28
AACS	ACTR1B	994	996	876	924	839	0.175	9.30	10.95	11.54	12.75	8.69	11.65	9.50	11.43	9.15	11.85
ACOT7	ACTR1B	707	998	871	934	765	0.357	8.95	10.95	12.56	12.75	9.34	11.65	9.09	11.43	7.77	11.85
AACS	ACTR3B	852	1000	846	654	761	0.444	9.30	8.08	11.54	10.67	8.69	8.74	9.50	7.19	9.15	9.22
ABHD14A	ACTR3B	716	963	575	716	348	0.672	8.84	8.08	10.56	10.67	8.95	8.74	7.80	7.19	9.20	9.22
ACOT8	ACTR3B	898	997	823	872	751	0.322	10.20	8.08	9.85	10.67	9.48	8.74	8.35	7.19	9.68	9.22
AAK1	ACVR1B	424	992	739	666	870	0.597	9.20	11.17	12.16	11.45	7.27	11.66	7.95	10.74	9.38	10.45
ABHD16A	ACYP1	195	926	782	802	758	0.431	12.08	7.01	10.78	8.42	11.23	6.82	10.70	7.49	10.93	8.69
AARS	ACYP2	729	858	836	711	712	0.222	10.69	8.11	13.64	10.27	12.72	8.97	12.45	7.23	12.26	11.38
ACSL3	ACYP2	581	957	774	889	667	0.459	10.77	8.11	12.05	10.27	11.59	8.97	11.44	7.23	11.42	11.38
AAMP	ADAR	650	981	979	971	952	0.186	11.14	14.06	11.83	13.41	11.95	13.21	11.48	13.65	11.79	11.51
ABCF2	ADAR	739	1000	956	902	886	0.259	10.66	14.06	11.35	13.41	10.03	13.21	10.65	13.65	12.40	11.51
ACTR1B	ADAR	694	934	941	941	910	0.132	10.95	14.06	12.75	13.41	11.65	13.21	11.43	13.65	11.85	11.51
AAK1	ADARB1	871	1000	842	530	410	0.628	9.20	9.95	12.16	11.09	7.27	9.64	7.95	12.56	9.38	10.70
ABHD16A	ADO	658	956	943	990	506	0.381	12.08	9.12	10.78	10.15	11.23	8.75	10.70	8.81	10.93	9.94
ADD3	AFF1	971	896	950	862	483	0.215	12.07	11.60	13.29	10.22	10.02	11.86	12.02	12.67	9.87	13.42
AAK1	AFG3L2	792	994	852	111	821	0.505	9.20	9.57	12.16	10.17	7.27	10.61	7.95	9.71	9.38	12.40
ABR	AFG3L2	748	962	732	902	322	0.483	12.54	9.57	15.13	10.17	9.16	10.61	13.01	9.71	10.48	12.40
AARS	AGGF1	89	956	985	854	923	0.295	10.69	9.68	13.64	10.40	12.72	9.83	12.45	9.49	12.26	10.24
ACTR3B	AGGF1	868	962	731	841	775	0.317	8.08	9.68	10.67	10.40	8.74	9.83	7.19	9.49	9.22	10.24
AAK1	AGK	950	984	676	542	554	0.607	9.20	9.76	12.16	10.56	7.27	10.09	7.95	9.99	9.38	9.39
ACOT7	AGK	884	923	770	665	789	0.292	8.95	9.76	12.56	10.56	9.34	10.09	9.09	9.99	7.77	9.39
ACAT2	AGTPBP1	460	909	550	450	371	0.793	9.24	12.39	9.59	10.71	11.06	8.67	9.07	10.76	7.47	10.43
ABCE1	AIG1	740	989	543	780	5	0.697	9.41	9.57	9.86	10.35	10.65	12.31	10.36	9.19	11.08	8.37
ACTR3	AIMP2	812	883	978	872	795	0.085	13.52	8.43	11.42	6.79	11.57	8.54	12.71	7.07	11.36	10.85
AARS	AKAP11	668	933	803	710	938	0.309	10.69	9.71	13.64	12.22	12.72	10.48	12.45	11.26	12.26	10.48
ACO2	AKAP11	672	659	781	854	403	0.080	10.98	9.71	13.28	12.22	11.13	10.48	10.79	11.26	14.13	10.48
AASDHPPT	ALAS1	400	903	630	634	538	0.655	9.13	11.62	10.72	10.59	10.05	13.01	8.97	11.01	10.52	11.83
ABHD10	ALAS1	378	941	384	471	493	0.882	9.39	11.62	10.13	10.59	10.64	13.01	8.78	11.01	9.44	11.83
ACTR6	ALAS1	239	935	455	667	741	0.666	8.33	11.62	9.81	10.59	9.19	13.01	8.59	11.01	9.37	11.83
AKAP11	ALAS1	376	889	603	516	340	0.719	9.71	11.62	12.22	10.59	10.48	13.01	11.26	11.01	10.48	11.83
AKTIP	ALAS1	271	915	452	678	798	0.592	10.10	11.62	11.35	10.59	9.95	13.01	9.76	11.01	11.55	11.83
ABCA1	ALDH2	615	719	193	404	554	0.353	10.93	12.31	8.82	14.12	12.91	15.62	11.78	13.79	11.20	13.17
ABI1	ALDH5A1	156	973	346	722	59	0.835	12.04	9.01	11.33	12.08	10.60	12.51	11.21	8.14	10.47	11.08
ABCA1	ALDH6A1	449	699	213	72	85	0.398	10.93	8.42	8.82	12.86	12.91	13.70	11.78	9.40	11.20	10.84
AHCYL1	ALDH6A1	814	973	660	652	17	0.633	11.39	8.42	14.46	12.86	12.09	13.70	12.49	9.40	12.94	10.84
ABHD14A	ALDOA	505	973	440	761	939	0.594	8.84	16.43	10.56	16.81	8.95	13.08	7.80	14.97	9.20	17.22
ACYP2	ALDOA	601	865	442	772	859	0.364	8.11	16.43	10.27	16.81	8.97	13.08	7.23	14.97	11.38	17.22
ADAR	ALDOA	496	958	716	874	151	0.621	14.06	16.43	13.41	16.81	13.21	13.08	13.65	14.97	11.51	17.22
AKAP11	ALDOA	123	844	799	519	158	0.529	9.71	16.43	12.22	16.81	10.48	13.08	11.26	14.97	10.48	17.22
AGPAT2	ALS2CL	31	594	695	650	402	0.094	11.77	8.74	8.54	10.92	13.80	12.01	11.21	12.61	10.14	10.43
ABHD6	AMD1	953	972	634	572	620	0.554	8.61	11.47	9.93	11.63	11.20	10.87	8.06	11.53	8.20	11.09
ACLY	AMN1	496	989	643	806	959	0.524	11.68	8.84	11.40	8.55	11.29	5.90	12.19	6.21	10.58	8.60
ACTR1A	AMN1	849	974	964	913	983	0.098	12.69	8.84	13.19	8.55	11.53	5.90	12.55	6.21	13.28	8.60
ACTR2	AMN1	985	1000	961	907	989	0.079	13.66	8.84	12.75	8.55	12.04	5.90	12.84	6.21	12.11	8.60
ABHD14A	AMPD2	741	951	833	343	90	0.615	8.84	12.96	10.56	12.36	8.95	11.59	7.80	11.04	9.20	8.62
ALDH2	AMZ2	601	607	617	921	819	0.003	12.31	11.25	14.12	11.96	15.62	10.24	13.79	10.23	13.17	11.39
ACOT7	ANAPC1	859	949	853	901	639	0.272	8.95	9.84	12.56	9.97	9.34	9.78	9.09	9.80	7.77	10.50
ALDOA	ANAPC1	330	932	895	926	624	0.392	16.43	9.84	16.81	9.97	13.08	9.78	14.97	9.80	17.22	10.50
ALKBH6	ANAPC15	534	940	819	983	826	0.321	9.38	9.27	9.09	8.43	8.86	7.87	7.90	7.11	8.06	8.87
ACADVL	ANAPC16	823	850	832	718	889	0.088	13.09	11.73	13.51	10.38	15.55	11.96	14.35	11.58	15.05	12.64
ABHD14A	ANKH	552	916	778	699	956	0.359	8.84	10.99	10.56	12.55	8.95	11.70	7.80	10.76	9.20	12.06
ACOT7	ANKH	714	970	805	720	72	0.571	8.95	10.99	12.56	12.55	9.34	11.70	9.09	10.76	7.77	12.06
ACSL3	ANKH	21	966	851	857	734	0.461	10.77	10.99	12.05	12.55	11.59	11.70	11.44	10.76	11.42	12.06
ACTR2	ANKH	26	978	909	882	99	0.560	13.66	10.99	12.75	12.55	12.04	11.70	12.84	10.76	12.11	12.06
ACTR3B	ANKH	215	987	809	838	436	0.650	8.08	10.99	10.67	12.55	8.74	11.70	7.19	10.76	9.22	12.06
AFTPH	ANKH	92	1000	920	924	210	0.578	11.51	10.99	10.31	12.55	10.58	11.70	10.39	10.76	10.27	12.06
AGK	ANKH	614	997	838	874	569	0.546	9.76	10.99	10.56	12.55	10.09	11.70	9.99	10.76	9.39	12.06
ALAS1	ANKH	204	954	499	737	680	0.700	11.62	10.99	10.59	12.55	13.01	11.70	11.01	10.76	11.83	12.06
ACSL1	ANKIB1	407	915	613	329	608	0.720	16.81	9.71	10.48	10.84	15.79	9.91	14.09	10.49	15.03	10.24
ACBD6	ANKMY2	922	996	757	807	643	0.427	9.47	8.70	9.15	10.40	8.86	9.01	9.20	8.93	9.75	9.78
ACSL3	ANKMY2	720	992	389	804	648	0.648	10.77	8.70	12.05	10.40	11.59	9.01	11.44	8.93	11.42	9.78
ACTR1A	ANKMY2	622	992	572	852	114	0.711	12.69	8.70	13.19	10.40	11.53	9.01	12.55	8.93	13.28	9.78
ADK	ANKMY2	879	970	535	724	736	0.503	9.38	8.70	8.69	10.40	11.59	9.01	9.31	8.93	9.63	9.78
AFG3L2	ANKMY2	975	999	392	638	340	0.692	9.57	8.70	10.17	10.40	10.61	9.01	9.71	8.93	12.40	9.78
ALAS1	ANKMY2	492	970	407	578	458	0.901	11.62	8.70	10.59	10.40	13.01	9.01	11.01	8.93	11.83	9.78
ALDOA	ANKMY2	260	970	308	551	548	0.890	16.43	8.70	16.81	10.40	13.08	9.01	14.97	8.93	17.22	9.78
ACBD6	ANKRD13C	870	996	960	922	969	0.132	9.47	8.77	9.15	9.68	8.86	9.19	9.20	9.41	9.75	10.03
AIMP2	ANKRD13C	593	823	627	672	682	0.359	8.43	8.77	6.79	9.68	8.54	9.19	7.07	9.41	10.85	10.03
ALDOA	ANKRD17	417	887	802	871	275	0.438	16.43	11.01	16.81	12.06	13.08	11.84	14.97	12.00	17.22	12.31
ABHD16A	ANKRD46	618	913	667	927	604	0.425	12.08	7.77	10.78	10.73	11.23	10.25	10.70	8.45	10.93	10.73
ACLY	ANKRD46	867	987	72	748	249	0.666	11.68	7.77	11.40	10.73	11.29	10.25	12.19	8.45	10.58	10.73
ACSL3	ANKRD46	757	999	232	775	704	0.630	10.77	7.77	12.05	10.73	11.59	10.25	11.44	8.45	11.42	10.73
ALAS1	ANKRD46	335	920	329	374	666	0.757	11.62	7.77	10.59	10.73	13.01	10.25	11.01	8.45	11.83	10.73
ACOT7	ANKRD50	32	831	707	707	661	0.374	8.95	8.87	12.56	8.50	9.34	9.23	9.09	10.30	7.77	8.45
ACTR3B	ANKRD50	798	931	286	783	660	0.491	8.08	8.87	10.67	8.50	8.74	9.23	7.19	10.30	9.22	8.45
ADIPOR2	ANP32B	750	964	588	844	850	0.412	11.66	12.15	11.71	10.81	12.99	11.20	12.53	12.39	11.90	11.63
ALDH9A1	ANXA5	953	855	461	930	810	0.200	10.92	12.97	11.35	11.49	12.40	12.29	11.03	14.44	11.92	11.68
AAK1	ANXA6	856	997	771	379	61	0.680	9.20	13.34	12.16	13.41	7.27	13.42	7.95	13.49	9.38	13.33
ACACA	ANXA6	953	973	664	601	203	0.587	9.30	13.34	12.39	13.41	11.38	13.42	11.12	13.49	11.05	13.33
ACP1	ANXA6	791	986	963	786	859	0.273	10.60	13.34	11.17	13.41	11.47	13.42	10.94	13.49	11.32	13.33
ACTR10	ANXA6	151	989	928	924	988	0.308	10.67	13.34	11.18	13.41	10.08	13.42	10.38	13.49	10.76	13.33
ACTR3B	ANXA6	650	999	456	761	650	0.718	8.08	13.34	10.67	13.41	8.74	13.42	7.19	13.49	9.22	13.33
AFTPH	ANXA6	413	940	710	800	512	0.619	11.51	13.34	10.31	13.41	10.58	13.42	10.39	13.49	10.27	13.33
ALAS1	ANXA6	698	978	852	459	430	0.681	11.62	13.34	10.59	13.41	13.01	13.42	11.01	13.49	11.83	13.33
ANKMY2	ANXA6	728	983	720	801	979	0.352	8.70	13.34	10.40	13.41	9.01	13.42	8.93	13.49	9.78	13.33
ANKMY2	ANXA7	822	978	559	807	506	0.609	8.70	11.87	10.40	11.61	9.01	12.30	8.93	11.94	9.78	13.06
AKAP11	AP1M1	505	912	882	903	936	0.223	9.71	12.05	12.22	11.47	10.48	12.13	11.26	10.98	10.48	11.02
AMN1	AP1M1	672	945	714	852	969	0.298	8.84	12.05	8.55	11.47	5.90	12.13	6.21	10.98	8.60	11.02
ANKMY2	AP1M1	723	984	639	831	123	0.622	8.70	12.05	10.40	11.47	9.01	12.13	8.93	10.98	9.78	11.02
AACS	AP2A2	976	995	866	916	788	0.217	9.30	11.52	11.54	12.91	8.69	12.19	9.50	12.23	9.15	11.17
ACOT7	AP2A2	667	999	898	927	977	0.264	8.95	11.52	12.56	12.91	9.34	12.19	9.09	12.23	7.77	11.17
ACVR2A	AP2A2	742	955	901	893	921	0.181	7.85	11.52	8.40	12.91	8.92	12.19	8.82	12.23	9.23	11.17
ANKRD46	AP2A2	777	910	674	918	323	0.390	7.77	11.52	10.73	12.91	10.25	12.19	8.45	12.23	10.73	11.17
ADK	AP2B1	728	907	757	886	961	0.175	9.38	12.77	8.69	14.15	11.59	11.74	9.31	13.34	9.63	12.61
ANKRD46	AP2B1	802	987	483	942	745	0.479	7.77	12.77	10.73	14.15	10.25	11.74	8.45	13.34	10.73	12.61
AAK1	AP2M1	351	1000	938	321	848	0.607	9.20	13.46	12.16	14.96	7.27	12.91	7.95	13.65	9.38	12.83
AFG3L2	AP2M1	766	1000	997	918	906	0.206	9.57	13.46	10.17	14.96	10.61	12.91	9.71	13.65	12.40	12.83
AFTPH	AP2M1	654	970	941	949	982	0.183	11.51	13.46	10.31	14.96	10.58	12.91	10.39	13.65	10.27	12.83
AGGF1	AP2M1	537	970	1000	964	972	0.220	9.68	13.46	10.40	14.96	9.83	12.91	9.49	13.65	10.24	12.83
AGK	AP2M1	441	975	771	917	966	0.373	9.76	13.46	10.56	14.96	10.09	12.91	9.99	13.65	9.39	12.83
ANKMY2	AP2M1	594	995	748	913	398	0.613	8.70	13.46	10.40	14.96	9.01	12.91	8.93	13.65	9.78	12.83
ANKRD17	AP2M1	624	959	997	962	946	0.174	11.01	13.46	12.06	14.96	11.84	12.91	12.00	13.65	12.31	12.83
AACS	AP2S1	573	998	817	927	815	0.430	9.30	11.67	11.54	11.54	8.69	11.29	9.50	10.76	9.15	10.67
AAK1	AP2S1	118	958	808	43	413	0.762	9.20	11.67	12.16	11.54	7.27	11.29	7.95	10.76	9.38	10.67
ABCA3	AP2S1	299	994	792	814	830	0.520	8.87	11.67	12.96	11.54	7.45	11.29	13.89	10.76	10.00	10.67
ACTR10	AP2S1	661	971	993	917	961	0.187	10.67	11.67	11.18	11.54	10.08	11.29	10.38	10.76	10.76	10.67
ADAR	AP2S1	502	932	929	779	839	0.340	14.06	11.67	13.41	11.54	13.21	11.29	13.65	10.76	11.51	10.67
AFG3L2	AP2S1	616	973	975	917	825	0.281	9.57	11.67	10.17	11.54	10.61	11.29	9.71	10.76	12.40	10.67
AGGF1	AP2S1	516	878	978	872	857	0.195	9.68	11.67	10.40	11.54	9.83	11.29	9.49	10.76	10.24	10.67
AGK	AP2S1	241	879	797	507	907	0.416	9.76	11.67	10.56	11.54	10.09	11.29	9.99	10.76	9.39	10.67
AKAP11	AP2S1	266	853	908	445	665	0.447	9.71	11.67	12.22	11.54	10.48	11.29	11.26	10.76	10.48	10.67
ALAS1	AP2S1	509	939	702	849	616	0.540	11.62	11.67	10.59	11.54	13.01	11.29	11.01	10.76	11.83	10.67
ANAPC1	AP2S1	386	922	976	863	868	0.268	9.84	11.67	9.97	11.54	9.78	11.29	9.80	10.76	10.50	10.67
ANKH	AP2S1	248	944	903	542	580	0.625	10.99	11.67	12.55	11.54	11.70	11.29	10.76	10.76	12.06	10.67
ANKMY2	AP2S1	439	947	776	532	667	0.656	8.70	11.67	10.40	11.54	9.01	11.29	8.93	10.76	9.78	10.67
ANKRD17	AP2S1	381	852	958	740	660	0.328	11.01	11.67	12.06	11.54	11.84	11.29	12.00	10.76	12.31	10.67
ACP1	AP3M2	869	1000	810	763	928	0.315	10.60	9.51	11.17	11.41	11.47	8.40	10.94	10.06	11.32	9.31
ACSL3	AP3M2	189	974	509	814	830	0.622	10.77	9.51	12.05	11.41	11.59	8.40	11.44	10.06	11.42	9.31
ACTR1A	AP3M2	208	997	790	924	596	0.589	12.69	9.51	13.19	11.41	11.53	8.40	12.55	10.06	13.28	9.31
AP2S1	APBA2	169	1000	519	470	472	0.991	11.67	10.46	11.54	13.30	11.29	6.20	10.76	7.87	10.67	4.12
ACTR3B	APEH	968	980	747	735	791	0.340	8.08	11.53	10.67	11.27	8.74	11.97	7.19	10.92	9.22	12.44
AP3M2	APEH	603	991	519	432	865	0.739	9.51	11.53	11.41	11.27	8.40	11.97	10.06	10.92	9.31	12.44
ALAS1	APEX1	569	966	776	806	324	0.607	11.62	11.34	10.59	11.28	13.01	11.78	11.01	11.57	11.83	11.78
ACSL3	APLP2	950	994	907	984	808	0.164	10.77	14.29	12.05	14.14	11.59	14.20	11.44	15.53	11.42	12.35
AMN1	APLP2	797	948	932	869	918	0.138	8.84	14.29	8.55	14.14	5.90	14.20	6.21	15.53	8.60	12.35
ANKRD46	APLP2	552	967	656	789	539	0.666	7.77	14.29	10.73	14.14	10.25	14.20	8.45	15.53	10.73	12.35
AP3M2	APLP2	237	950	543	599	769	0.695	9.51	14.29	11.41	14.14	8.40	14.20	10.06	15.53	9.31	12.35
AFG3L2	APMAP	485	982	980	970	726	0.376	9.57	13.88	10.17	11.98	10.61	14.10	9.71	11.96	12.40	10.81
AK6	APMAP	101	108	96	50	47	0.000	0.00	13.88	0.00	11.98	0.00	14.10	0.00	11.96	0.00	10.81
AKAP9	APMAP	390	913	561	633	138	0.729	10.40	13.88	11.00	11.98	12.22	14.10	11.83	11.96	12.01	10.81
ANKMY2	APMAP	576	969	212	771	6	0.764	8.70	13.88	10.40	11.98	9.01	14.10	8.93	11.96	9.78	10.81
ANKRD46	APMAP	601	928	190	800	48	0.655	7.77	13.88	10.73	11.98	10.25	14.10	8.45	11.96	10.73	10.81
AAK1	APOO	400	979	891	72	143	0.762	9.20	8.02	12.16	9.77	7.27	8.10	7.95	6.73	9.38	9.50
ACADSB	APOO	567	878	69	773	900	0.397	8.48	8.02	10.49	9.77	14.23	8.10	9.76	6.73	11.81	9.50
ACSL3	APOO	623	990	877	911	560	0.494	10.77	8.02	12.05	9.77	11.59	8.10	11.44	6.73	11.42	9.50
ACTR3B	APOO	696	994	679	837	367	0.632	8.08	8.02	10.67	9.77	8.74	8.10	7.19	6.73	9.22	9.50
AGGF1	APOO	715	986	984	911	772	0.281	9.68	8.02	10.40	9.77	9.83	8.10	9.49	6.73	10.24	9.50
AKAP11	APOO	562	974	854	672	372	0.654	9.71	8.02	12.22	9.77	10.48	8.10	11.26	6.73	10.48	9.50
ANKH	APOO	181	979	714	547	758	0.699	10.99	8.02	12.55	9.77	11.70	8.10	10.76	6.73	12.06	9.50
ANKMY2	APOO	693	992	763	709	751	0.526	8.70	8.02	10.40	9.77	9.01	8.10	8.93	6.73	9.78	9.50
ANKRD17	APOO	688	932	946	833	255	0.388	11.01	8.02	12.06	9.77	11.84	8.10	12.00	6.73	12.31	9.50
ANKRD46	APOO	677	996	392	754	862	0.596	7.77	8.02	10.73	9.77	10.25	8.10	8.45	6.73	10.73	9.50
AP1S2	APOO	649	936	923	852	497	0.410	10.84	8.02	10.40	9.77	8.09	8.10	9.86	6.73	11.74	9.50
AP4S1	APOO	750	996	720	792	754	0.484	7.58	8.02	8.26	9.77	6.74	8.10	6.37	6.73	8.07	9.50
APMAP	APOO	597	966	870	962	81	0.468	13.88	8.02	11.98	9.77	14.10	8.10	11.96	6.73	10.81	9.50
AP3M2	APOOL	642	772	547	519	668	0.356	9.51	5.70	11.41	4.11	8.40	6.92	10.06	4.98	9.31	7.81
ACSL1	APPBP2	833	736	780	234	600	0.186	16.81	9.95	10.48	10.66	15.79	9.83	14.09	10.27	15.03	10.53
ACOT13	ARCN1	908	906	674	977	908	0.116	9.36	12.15	9.23	11.54	10.76	12.35	8.25	12.52	10.11	11.67
AKR1A1	ARCN1	898	964	572	947	772	0.334	11.06	12.15	10.32	11.54	13.11	12.35	11.49	12.52	10.34	11.67
ANKRD39	ARCN1	547	931	563	730	219	0.692	8.37	12.15	8.42	11.54	8.37	12.35	7.01	12.52	13.32	11.67
ACOT7	AREL1	16	990	775	896	826	0.481	8.95	11.86	12.56	10.89	9.34	10.35	9.09	10.68	7.77	10.60
AP2A2	ARF1	926	994	954	895	998	0.103	11.52	14.33	12.91	14.00	12.19	13.87	12.23	14.52	11.17	13.66
ABHD14A	ARF3	394	922	721	800	313	0.584	8.84	12.71	10.56	14.56	8.95	11.49	7.80	12.91	9.20	9.96
ACTR10	ARF3	941	991	992	941	820	0.136	10.67	12.71	11.18	14.56	10.08	11.49	10.38	12.91	10.76	9.96
AFG3L2	ARF3	670	993	1000	971	603	0.367	9.57	12.71	10.17	14.56	10.61	11.49	9.71	12.91	12.40	9.96
AKTIP	ARF3	969	989	982	912	670	0.211	10.10	12.71	11.35	14.56	9.95	11.49	9.76	12.91	11.55	9.96
ACAT2	ARFGEF1	796	903	805	731	545	0.367	9.24	11.47	9.59	10.60	11.06	10.76	9.07	11.19	7.47	11.13
ALDOA	ARFGEF2	182	892	762	829	356	0.488	16.43	9.76	16.81	10.80	13.08	11.48	14.97	11.11	17.22	11.32
AP3M2	ARFGEF2	955	989	599	631	662	0.554	9.51	9.76	11.41	10.80	8.40	11.48	10.06	11.11	9.31	11.32
APMAP	ARFGEF2	218	974	965	924	877	0.315	13.88	9.76	11.98	10.80	14.10	11.48	11.96	11.11	10.81	11.32
ACOT7	ARFIP2	836	996	473	863	973	0.406	8.95	10.53	12.56	10.86	9.34	11.02	9.09	10.59	7.77	9.79
ALAS1	ARFIP2	730	996	285	955	205	0.649	11.62	10.53	10.59	10.86	13.01	11.02	11.01	10.59	11.83	9.79
ALDOA	ARFIP2	807	997	905	985	112	0.396	16.43	10.53	16.81	10.86	13.08	11.02	14.97	10.59	17.22	9.79
ANXA6	ARFIP2	969	997	392	734	449	0.642	13.34	10.53	13.41	10.86	13.42	11.02	13.49	10.59	13.33	9.79
AP2M1	ARFIP2	925	1000	915	963	998	0.100	13.46	10.53	14.96	10.86	12.91	11.02	13.65	10.59	12.83	9.79
AP2S1	ARFIP2	825	996	777	933	902	0.274	11.67	10.53	11.54	10.86	11.29	11.02	10.76	10.59	10.67	9.79
ABHD17B	ARHGAP21	908	985	821	941	704	0.283	9.68	9.38	9.66	14.24	9.41	11.04	8.82	12.38	9.84	11.93
AACS	ARHGEF11	263	997	883	861	886	0.429	9.30	11.85	11.54	12.40	8.69	11.19	9.50	11.69	9.15	11.19
AAK1	ARHGEF11	78	1000	904	375	854	0.621	9.20	11.85	12.16	12.40	7.27	11.19	7.95	11.69	9.38	11.19
ANXA6	ARHGEF11	89	996	844	874	460	0.633	13.34	11.85	13.41	12.40	13.42	11.19	13.49	11.69	13.33	11.19
AP2A2	ARHGEF3	846	991	611	700	670	0.569	11.52	10.98	12.91	10.85	12.19	7.58	12.23	10.63	11.17	9.47
ARF3	ARHGEF3	509	985	469	709	733	0.745	12.71	10.98	14.56	10.85	11.49	7.58	12.91	10.63	9.96	9.47
AMPD3	ARHGEF37	61	848	520	155	203	0.686	11.34	7.59	9.32	10.09	7.03	7.97	9.17	8.61	12.10	10.94
ACP1	ARHGEF7	768	970	777	637	950	0.374	10.60	11.16	11.17	12.80	11.47	11.77	10.94	12.22	11.32	12.19
ADSS	ARHGEF7	905	981	858	628	867	0.333	10.83	11.16	10.09	12.80	9.86	11.77	10.46	12.22	9.52	12.19
AP5M1	ARHGEF7	563	903	688	316	562	0.649	9.81	11.16	9.09	12.80	9.79	11.77	9.05	12.22	10.10	12.19
ARF1	ARHGEF7	856	935	784	688	979	0.238	14.33	11.16	14.00	12.80	13.87	11.77	14.52	12.22	13.66	12.19
ABHD10	ARIH1	708	990	564	665	514	0.754	9.39	11.38	10.13	10.78	10.64	10.92	8.78	11.48	9.44	12.18
ACYP2	ARIH1	797	935	903	884	821	0.168	8.11	11.38	10.27	10.78	8.97	10.92	7.23	11.48	11.38	12.18
AGK	ARIH1	945	978	641	890	837	0.299	9.76	11.38	10.56	10.78	10.09	10.92	9.99	11.48	9.39	12.18
ALAS1	ARIH1	754	999	787	848	599	0.504	11.62	11.38	10.59	10.78	13.01	10.92	11.01	11.48	11.83	12.18
ALG9	ARIH1	932	997	982	972	886	0.108	9.06	11.38	9.34	10.78	9.90	10.92	9.63	11.48	9.64	12.18
APEX1	ARIH1	746	987	983	658	962	0.299	11.34	11.38	11.28	10.78	11.78	10.92	11.57	11.48	11.78	12.18
APLP2	ARIH1	668	997	971	960	972	0.208	14.29	11.38	14.14	10.78	14.20	10.92	15.53	11.48	12.35	12.18
APOO	ARIH1	492	977	940	665	684	0.559	8.02	11.38	9.77	10.78	8.10	10.92	6.73	11.48	9.50	12.18
ABHD6	ARIH2	835	987	712	811	616	0.487	8.61	11.21	9.93	11.22	11.20	11.15	8.06	11.37	8.20	12.84
ACOT7	ARL1	540	948	657	933	529	0.567	8.95	9.11	12.56	11.04	9.34	11.31	9.09	10.95	7.77	11.27
ALAS1	ARL1	461	957	559	811	590	0.684	11.62	9.11	10.59	11.04	13.01	11.31	11.01	10.95	11.83	11.27
ALDOA	ARL1	278	962	848	940	533	0.513	16.43	9.11	16.81	11.04	13.08	11.31	14.97	10.95	17.22	11.27
AP3M2	ARL1	775	998	675	832	979	0.365	9.51	9.11	11.41	11.04	8.40	11.31	10.06	10.95	9.31	11.27
ACOT7	ARL3	14	919	927	915	920	0.211	8.95	9.35	12.56	11.61	9.34	8.63	9.09	9.59	7.77	9.10
AFG3L2	ARL3	473	979	964	816	744	0.446	9.57	9.35	10.17	11.61	10.61	8.63	9.71	9.59	12.40	9.10
ALAS1	ARL3	290	917	739	707	267	0.611	11.62	9.35	10.59	11.61	13.01	8.63	11.01	9.59	11.83	9.10
ALDOA	ARL3	590	967	886	877	246	0.507	16.43	9.35	16.81	11.61	13.08	8.63	14.97	9.59	17.22	9.10
ANXA6	ARL3	117	936	963	956	839	0.267	13.34	9.35	13.41	11.61	13.42	8.63	13.49	9.59	13.33	9.10
AP2A2	ARL3	653	965	977	984	978	0.156	11.52	9.35	12.91	11.61	12.19	8.63	12.23	9.59	11.17	9.10
AP2M1	ARL3	709	981	999	997	992	0.136	13.46	9.35	14.96	11.61	12.91	8.63	13.65	9.59	12.83	9.10
APLP2	ARL3	866	971	986	898	924	0.113	14.29	9.35	14.14	11.61	14.20	8.63	15.53	9.59	12.35	9.10
ALAS1	ARL4C	498	899	264	496	99	0.798	11.62	12.00	10.59	10.94	13.01	8.86	11.01	10.55	11.83	7.25
ANXA6	ARL4C	916	932	441	453	582	0.615	13.34	12.00	13.41	10.94	13.42	8.86	13.49	10.55	13.33	7.25
AP2M1	ARL4C	237	953	776	565	751	0.610	13.46	12.00	14.96	10.94	12.91	8.86	13.65	10.55	12.83	7.25
APLP2	ARL4C	59	952	503	516	821	0.734	14.29	12.00	14.14	10.94	14.20	8.86	15.53	10.55	12.35	7.25
APOO	ARL4C	193	968	612	361	120	0.880	8.02	12.00	9.77	10.94	8.10	8.86	6.73	10.55	9.50	7.25
APEX1	ARL5A	838	816	942	782	624	0.113	11.34	9.51	11.28	9.60	11.78	10.21	11.57	10.32	11.78	11.23
AARS	ARL6IP5	118	987	729	702	799	0.609	10.69	12.49	13.64	12.08	12.72	10.83	12.45	12.39	12.26	12.76
ABHD16A	ARL6IP5	950	961	875	928	499	0.295	12.08	12.49	10.78	12.08	11.23	10.83	10.70	12.39	10.93	12.76
AFG3L2	ARL6IP5	763	967	838	848	837	0.291	9.57	12.49	10.17	12.08	10.61	10.83	9.71	12.39	12.40	12.76
AP1G1	ARL6IP5	780	947	823	921	779	0.242	12.11	12.49	11.51	12.08	12.25	10.83	12.16	12.39	12.05	12.76
ANAPC1	ARL8B	650	975	991	993	495	0.400	9.84	11.52	9.97	12.09	9.78	11.22	9.80	11.90	10.50	12.57
ANXA6	ARL8B	406	948	794	781	14	0.609	13.34	11.52	13.41	12.09	13.42	11.22	13.49	11.90	13.33	12.57
APMAP	ARL8B	835	951	888	997	980	0.089	13.88	11.52	11.98	12.09	14.10	11.22	11.96	11.90	10.81	12.57
AGTPBP1	ARMC10	685	962	952	756	882	0.286	12.39	9.66	10.71	10.38	8.67	10.14	10.76	9.77	10.43	9.69
APLP2	ARMC8	885	983	875	948	973	0.126	14.29	10.86	14.14	10.63	14.20	10.13	15.53	10.71	12.35	11.90
ACP1	ARMCX3	724	1000	913	890	886	0.293	10.60	10.37	11.17	11.74	11.47	10.85	10.94	11.43	11.32	10.96
AKTIP	ARMCX3	560	998	830	869	836	0.449	10.10	10.37	11.35	11.74	9.95	10.85	9.76	11.43	11.55	10.96
ANKH	ARMCX3	302	990	769	924	550	0.609	10.99	10.37	12.55	11.74	11.70	10.85	10.76	11.43	12.06	10.96
APLP2	ARMCX3	693	983	778	850	862	0.374	14.29	10.37	14.14	11.74	14.20	10.85	15.53	11.43	12.35	10.96
APOO	ARMCX3	544	992	848	765	675	0.568	8.02	10.37	9.77	11.74	8.10	10.85	6.73	11.43	9.50	10.96
ARHGEF12	ARNTL	28	970	363	760	679	0.721	10.51	11.00	12.92	10.37	13.16	10.34	13.32	10.18	12.74	10.61
AKAP11	ARPC1A	443	983	945	890	955	0.321	9.71	11.15	12.22	11.85	10.48	11.65	11.26	11.56	10.48	10.75
ARMCX3	ARPC1A	384	998	895	868	930	0.400	10.37	11.15	11.74	11.85	10.85	11.65	11.43	11.56	10.96	10.75
ACOT8	ARPC2	995	988	953	905	932	0.087	10.20	14.63	9.85	12.36	9.48	11.91	8.35	13.74	9.68	13.04
AP2A2	ARPC2	749	975	945	889	764	0.277	11.52	14.63	12.91	12.36	12.19	11.91	12.23	13.74	11.17	13.04
APEX1	ARPC2	540	987	989	942	794	0.343	11.34	14.63	11.28	12.36	11.78	11.91	11.57	13.74	11.78	13.04
APOA1BP	ARPC2	367	976	943	943	917	0.300	10.28	14.63	10.83	12.36	11.06	11.91	10.15	13.74	10.64	13.04
ARFIP2	ARPC2	612	999	915	975	770	0.362	10.53	14.63	10.86	12.36	11.02	11.91	10.59	13.74	9.79	13.04
ARL3	ARPC2	1000	993	992	906	889	0.096	9.35	14.63	11.61	12.36	8.63	11.91	9.59	13.74	9.10	13.04
ANKRD46	ARPC3	599	986	312	812	450	0.766	7.77	13.75	10.73	11.78	10.25	11.98	8.45	12.76	10.73	11.00
ABCA3	ARPC5L	887	990	687	686	734	0.483	8.87	10.88	12.96	11.60	7.45	10.90	13.89	10.85	10.00	11.00
ABR	ARPC5L	520	988	566	621	512	0.867	12.54	10.88	15.13	11.60	9.16	10.90	13.01	10.85	10.48	11.00
ACOT8	ARPC5L	461	999	817	721	908	0.525	10.20	10.88	9.85	11.60	9.48	10.90	8.35	10.85	9.68	11.00
ADARB1	ARPC5L	921	976	687	174	369	0.648	9.95	10.88	11.09	11.60	9.64	10.90	12.56	10.85	10.70	11.00
AMBRA1	ARPC5L	945	985	909	787	772	0.264	10.48	10.88	10.45	11.60	9.89	10.90	9.97	10.85	10.47	11.00
ANKRD17	ARPC5L	820	923	837	879	831	0.163	11.01	10.88	12.06	11.60	11.84	10.90	12.00	10.85	12.31	11.00
AP1M1	ARPC5L	740	997	926	775	935	0.306	12.05	10.88	11.47	11.60	12.13	10.90	10.98	10.85	11.02	11.00
AP3M2	ARPC5L	905	995	600	630	736	0.554	9.51	10.88	11.41	11.60	8.40	10.90	10.06	10.85	9.31	11.00
APLP2	ARPC5L	599	958	605	842	916	0.435	14.29	10.88	14.14	11.60	14.20	10.90	15.53	10.85	12.35	11.00
ARL3	ARPC5L	341	974	743	680	772	0.601	9.35	10.88	11.61	11.60	8.63	10.90	9.59	10.85	9.10	11.00
ANKMY2	ARPP19	975	983	741	870	544	0.401	8.70	11.60	10.40	13.95	9.01	11.53	8.93	12.49	9.78	13.18
ANXA6	ARPP19	474	960	916	670	606	0.574	13.34	11.60	13.41	13.95	13.42	11.53	13.49	12.49	13.33	13.18
AP2S1	ARPP19	454	929	977	645	756	0.443	11.67	11.60	11.54	13.95	11.29	11.53	10.76	12.49	10.67	13.18
AP3M2	ARPP19	577	993	790	810	777	0.509	9.51	11.60	11.41	13.95	8.40	11.53	10.06	12.49	9.31	13.18
ANP32B	ARRDC2	973	902	664	566	888	0.294	12.15	12.03	10.81	10.43	11.20	10.05	12.39	12.48	11.63	13.11
ANKIB1	ARRDC4	660	845	445	539	695	0.493	9.71	9.70	10.84	9.42	9.91	10.02	10.49	10.54	10.24	10.32
ABI1	ARV1	868	924	944	753	918	0.117	12.04	8.14	11.33	9.18	10.60	9.12	11.21	8.04	10.47	9.13
ACSL3	ARV1	768	996	837	784	828	0.384	10.77	8.14	12.05	9.18	11.59	9.12	11.44	8.04	11.42	9.13
ARCN1	ARV1	877	992	981	938	842	0.165	12.15	8.14	11.54	9.18	12.35	9.12	12.52	8.04	11.67	9.13
AFG3L2	ASB8	680	993	960	991	837	0.252	9.57	11.08	10.17	10.24	10.61	10.20	9.71	9.21	12.40	13.17
ARPC5L	ASB8	426	964	696	481	622	0.769	10.88	11.08	11.60	10.24	10.90	10.20	10.85	9.21	11.00	13.17
AGPAT2	ASMTL-AS1	120	532	378	611	295	0.048	11.77	7.58	8.54	7.10	13.80	8.65	11.21	7.13	10.14	6.83
AMN1	ASNA1	546	968	985	730	972	0.330	8.84	11.29	8.55	11.23	5.90	10.27	6.21	10.37	8.60	10.86
ANKH	ASNA1	276	972	856	586	255	0.723	10.99	11.29	12.55	11.23	11.70	10.27	10.76	10.37	12.06	10.86
ARHGEF9	ASNA1	499	984	444	873	546	0.758	9.21	11.29	13.15	11.23	8.97	10.27	9.44	10.37	8.78	10.86
APMAP	ASNSD1	782	971	923	950	907	0.161	13.88	9.78	11.98	10.25	14.10	10.33	11.96	9.92	10.81	11.47
ALDH6A1	ASPH	110	865	532	857	462	0.535	8.42	11.49	12.86	11.91	13.70	11.52	9.40	12.16	10.84	12.14
ACOT7	ATAD1	412	853	821	805	694	0.296	8.95	9.64	12.56	10.63	9.34	10.56	9.09	10.49	7.77	11.53
AP3M2	ATAD1	805	979	738	892	711	0.385	9.51	9.64	11.41	10.63	8.40	10.56	10.06	10.49	9.31	11.53
ABHD16A	ATF2	586	896	947	858	811	0.216	12.08	10.21	10.78	10.69	11.23	10.69	10.70	10.45	10.93	10.28
ALAS1	ATF2	555	910	378	654	475	0.716	11.62	10.21	10.59	10.69	13.01	10.69	11.01	10.45	11.83	10.28
APLP2	ATF2	656	982	802	892	994	0.298	14.29	10.21	14.14	10.69	14.20	10.69	15.53	10.45	12.35	10.28
AACS	ATG5	770	972	940	826	849	0.252	9.30	9.57	11.54	9.66	8.69	10.07	9.50	9.73	9.15	10.25
ALDOA	ATG5	272	947	845	860	372	0.541	16.43	9.57	16.81	9.66	13.08	10.07	14.97	9.73	17.22	10.25
ANXA6	ATG5	486	960	913	886	529	0.506	13.34	9.57	13.41	9.66	13.42	10.07	13.49	9.73	13.33	10.25
AP2S1	ATG5	530	936	973	819	930	0.265	11.67	9.57	11.54	9.66	11.29	10.07	10.76	9.73	10.67	10.25
APLP2	ATG5	707	969	972	941	975	0.145	14.29	9.57	14.14	9.66	14.20	10.07	15.53	9.73	12.35	10.25
ARFIP2	ATG5	746	986	882	915	973	0.214	10.53	9.57	10.86	9.66	11.02	10.07	10.59	9.73	9.79	10.25
ARHGEF9	ATG5	739	997	692	911	566	0.540	9.21	9.57	13.15	9.66	8.97	10.07	9.44	9.73	8.78	10.25
ARFIP2	ATG7	690	991	786	931	957	0.300	10.53	11.17	10.86	9.64	11.02	8.51	10.59	9.40	9.79	9.34
ANAPC16	ATL3	977	902	831	935	682	0.145	11.73	11.01	10.38	9.69	11.96	11.60	11.58	12.12	12.64	10.15
ANAPC5	ATOX1	975	847	770	933	922	0.038	11.89	10.15	12.29	9.86	12.10	11.07	12.02	9.45	12.47	8.97
ADIPOR2	ATP11A	747	979	713	738	870	0.424	11.66	11.64	11.71	10.03	12.99	10.95	12.53	12.72	11.90	10.74
AASDHPPT	ATP1A1	617	942	650	707	115	0.647	9.13	12.75	10.72	14.66	10.05	12.79	8.97	15.05	10.52	12.75
ABHD16A	ATP1A1	410	999	897	719	65	0.690	12.08	12.75	10.78	14.66	11.23	12.79	10.70	15.05	10.93	12.75
ACTR6	ATP1A1	409	923	664	683	324	0.672	8.33	12.75	9.81	14.66	9.19	12.79	8.59	15.05	9.37	12.75
ACYP2	ATP1A1	773	806	565	582	83	0.402	8.11	12.75	10.27	14.66	8.97	12.79	7.23	15.05	11.38	12.75
ANKH	ATP1A1	477	983	770	590	2	0.786	10.99	12.75	12.55	14.66	11.70	12.79	10.76	15.05	12.06	12.75
ANKMY2	ATP1A1	745	975	161	255	1	0.828	8.70	12.75	10.40	14.66	9.01	12.79	8.93	15.05	9.78	12.75
AP1S1	ATP1A1	429	967	616	764	207	0.744	9.29	12.75	11.58	14.66	10.01	12.79	8.75	15.05	8.04	12.75
AP2S1	ATP1A1	466	985	901	773	221	0.633	11.67	12.75	11.54	14.66	11.29	12.79	10.76	15.05	10.67	12.75
APOO	ATP1A1	600	975	924	726	27	0.575	8.02	12.75	9.77	14.66	8.10	12.79	6.73	15.05	9.50	12.75
ARFGEF2	ATP1A1	897	970	956	930	798	0.149	9.76	12.75	10.80	14.66	11.48	12.79	11.11	15.05	11.32	12.75
ARHGEF11	ATP1A1	137	996	823	617	681	0.681	11.85	12.75	12.40	14.66	11.19	12.79	11.69	15.05	11.19	12.75
ARNTL	ATP1A1	416	938	366	765	877	0.555	11.00	12.75	10.37	14.66	10.34	12.79	10.18	15.05	10.61	12.75
ATF2	ATP1A1	693	912	644	475	409	0.655	10.21	12.75	10.69	14.66	10.69	12.79	10.45	15.05	10.28	12.75
ACOT7	ATP1B1	739	996	844	795	464	0.553	8.95	7.56	12.56	13.70	9.34	12.15	9.09	11.50	7.77	13.79
ANKH	ATP1B1	414	988	759	460	155	0.847	10.99	7.56	12.55	13.70	11.70	12.15	10.76	11.50	12.06	13.79
APP	ATP1B1	651	1000	878	767	300	0.602	11.62	7.56	15.56	13.70	13.71	12.15	15.23	11.50	12.32	13.79
AKAP11	ATP2A2	970	996	768	636	41	0.555	9.71	11.26	12.22	13.85	10.48	13.40	11.26	13.45	10.48	16.43
ANKH	ATP2A2	283	998	829	932	682	0.524	10.99	11.26	12.55	13.85	11.70	13.40	10.76	13.45	12.06	16.43
APOO	ATP2A2	591	995	800	818	689	0.541	8.02	11.26	9.77	13.85	8.10	13.40	6.73	13.45	9.50	16.43
ARHGEF3	ATP2A2	988	1000	207	599	123	0.707	10.98	11.26	10.85	13.85	7.58	13.40	10.63	13.45	9.47	16.43
AACS	ATP2B1	814	996	737	369	759	0.587	9.30	11.12	11.54	12.96	8.69	10.17	9.50	10.84	9.15	11.09
AAK1	ATP2B1	901	1000	870	839	860	0.265	9.20	11.12	12.16	12.96	7.27	10.17	7.95	10.84	9.38	11.09
ABI2	ATP2B1	915	989	486	921	898	0.361	9.03	11.12	12.97	12.96	10.20	10.17	11.15	10.84	10.01	11.09
ACVR1B	ATP2B1	407	998	837	741	741	0.587	11.17	11.12	11.45	12.96	11.66	10.17	10.74	10.84	10.45	11.09
ANKMY2	ATP2B1	914	983	451	750	350	0.634	8.70	11.12	10.40	12.96	9.01	10.17	8.93	10.84	9.78	11.09
ARF1	ATP2B1	677	985	924	828	899	0.306	14.33	11.12	14.00	12.96	13.87	10.17	14.52	10.84	13.66	11.09
ARF3	ATP2B1	359	974	856	794	824	0.461	12.71	11.12	14.56	12.96	11.49	10.17	12.91	10.84	9.96	11.09
ACSL3	ATP5A1	733	986	925	966	659	0.331	10.77	12.98	12.05	14.59	11.59	14.03	11.44	13.65	11.42	15.13
AFTPH	ATP5A1	884	979	752	959	255	0.410	11.51	12.98	10.31	14.59	10.58	14.03	10.39	13.65	10.27	15.13
ALDOA	ATP5A1	649	988	875	988	946	0.247	16.43	12.98	16.81	14.59	13.08	14.03	14.97	13.65	17.22	15.13
ANKH	ATP5A1	241	979	872	741	884	0.460	10.99	12.98	12.55	14.59	11.70	14.03	10.76	13.65	12.06	15.13
AP1S2	ATP5A1	879	928	853	950	645	0.203	10.84	12.98	10.40	14.59	8.09	14.03	9.86	13.65	11.74	15.13
APLP2	ATP5A1	789	997	1000	975	301	0.363	14.29	12.98	14.14	14.59	14.20	14.03	15.53	13.65	12.35	15.13
ARIH1	ATP5A1	682	991	967	804	600	0.456	11.38	12.98	10.78	14.59	10.92	14.03	11.48	13.65	12.18	15.13
ARMCX3	ATP5A1	715	994	821	813	648	0.489	10.37	12.98	11.74	14.59	10.85	14.03	11.43	13.65	10.96	15.13
ATF2	ATP5A1	761	963	709	802	472	0.540	10.21	12.98	10.69	14.59	10.69	14.03	10.45	13.65	10.28	15.13
ATP2B1	ATP5A1	599	972	784	555	543	0.704	11.12	12.98	12.96	14.59	10.17	14.03	10.84	13.65	11.09	15.13
AGGF1	ATP5B	798	990	994	924	637	0.305	9.68	13.74	10.40	14.91	9.83	14.35	9.49	14.31	10.24	15.46
AKAP11	ATP5B	682	974	833	764	181	0.558	9.71	13.74	12.22	14.91	10.48	14.35	11.26	14.31	10.48	15.46
ANKH	ATP5B	232	995	830	777	772	0.550	10.99	13.74	12.55	14.91	11.70	14.35	10.76	14.31	12.06	15.46
ANKRD46	ATP5B	764	990	180	730	714	0.626	7.77	13.74	10.73	14.91	10.25	14.35	8.45	14.31	10.73	15.46
AP1S2	ATP5B	765	897	899	888	606	0.216	10.84	13.74	10.40	14.91	8.09	14.35	9.86	14.31	11.74	15.46
AP4S1	ATP5B	882	995	695	799	608	0.498	7.58	13.74	8.26	14.91	6.74	14.35	6.37	14.31	8.07	15.46
ARL3	ATP5B	810	993	987	934	433	0.370	9.35	13.74	11.61	14.91	8.63	14.35	9.59	14.31	9.10	15.46
ARL4C	ATP5B	308	976	476	416	94	0.952	12.00	13.74	10.94	14.91	8.86	14.35	10.55	14.31	7.25	15.46
ARL6IP5	ATP5B	873	984	855	908	729	0.285	12.49	13.74	12.08	14.91	10.83	14.35	12.39	14.31	12.76	15.46
ARMCX3	ATP5B	652	998	873	881	682	0.452	10.37	13.74	11.74	14.91	10.85	14.35	11.43	14.31	10.96	15.46
ATF2	ATP5B	623	947	652	818	443	0.598	10.21	13.74	10.69	14.91	10.69	14.35	10.45	14.31	10.28	15.46
ATP1B1	ATP5B	438	996	910	953	729	0.446	7.56	13.74	13.70	14.91	12.15	14.35	11.50	14.31	13.79	15.46
APMAP	ATP5C1	746	990	918	999	183	0.403	13.88	11.21	11.98	11.93	14.10	12.64	11.96	11.58	10.81	13.26
AREL1	ATP5C1	703	993	966	989	582	0.366	11.86	11.21	10.89	11.93	10.35	12.64	10.68	11.58	10.60	13.26
ACSL3	ATP5G3	737	963	866	950	444	0.400	10.77	11.42	12.05	12.34	11.59	13.03	11.44	11.62	11.42	13.28
ANKH	ATP5G3	187	984	805	706	747	0.589	10.99	11.42	12.55	12.34	11.70	13.03	10.76	11.62	12.06	13.28
ARIH1	ATP5G3	605	980	955	744	325	0.558	11.38	11.42	10.78	12.34	10.92	13.03	11.48	11.62	12.18	13.28
ARMCX3	ATP5G3	703	995	771	830	561	0.557	10.37	11.42	11.74	12.34	10.85	13.03	11.43	11.62	10.96	13.28
ATP1A1	ATP5G3	739	997	913	883	26	0.476	12.75	11.42	14.66	12.34	12.79	13.03	15.05	11.62	12.75	13.28
ACSL3	ATP5H	670	927	870	937	687	0.277	10.77	10.99	12.05	11.77	11.59	11.93	11.44	11.03	11.42	12.93
ACTR3B	ATP5H	848	985	833	898	795	0.283	8.08	10.99	10.67	11.77	8.74	11.93	7.19	11.03	9.22	12.93
AMN1	ATP5H	634	983	957	864	690	0.394	8.84	10.99	8.55	11.77	5.90	11.93	6.21	11.03	8.60	12.93
ANKH	ATP5H	126	947	846	714	792	0.468	10.99	10.99	12.55	11.77	11.70	11.93	10.76	11.03	12.06	12.93
ANKRD17	ATP5H	668	849	957	897	565	0.233	11.01	10.99	12.06	11.77	11.84	11.93	12.00	11.03	12.31	12.93
APLP2	ATP5H	767	952	973	933	663	0.246	14.29	10.99	14.14	11.77	14.20	11.93	15.53	11.03	12.35	12.93
ARIH1	ATP5H	469	932	965	737	829	0.365	11.38	10.99	10.78	11.77	10.92	11.93	11.48	11.03	12.18	12.93
ARMCX3	ATP5H	587	964	831	825	767	0.423	10.37	10.99	11.74	11.77	10.85	11.93	11.43	11.03	10.96	12.93
ATF2	ATP5H	581	888	838	767	731	0.318	10.21	10.99	10.69	11.77	10.69	11.93	10.45	11.03	10.28	12.93
ATP1A1	ATP5H	635	949	918	865	94	0.439	12.75	10.99	14.66	11.77	12.79	11.93	15.05	11.03	12.75	12.93
ATP2B1	ATP5H	320	923	792	550	634	0.608	11.12	10.99	12.96	11.77	10.17	11.93	10.84	11.03	11.09	12.93
AARS	ATP5J	322	927	911	944	617	0.377	10.69	9.74	13.64	11.36	12.72	11.91	12.45	10.12	12.26	12.56
ACSL3	ATP5J	715	957	854	950	640	0.335	10.77	9.74	12.05	11.36	11.59	11.91	11.44	10.12	11.42	12.56
AP2M1	ATP5J	756	965	991	1000	735	0.220	13.46	9.74	14.96	11.36	12.91	11.91	13.65	10.12	12.83	12.56
ARCN1	ATP5J	808	931	945	994	650	0.202	12.15	9.74	11.54	11.36	12.35	11.91	12.52	10.12	11.67	12.56
ARFGEF2	ATP5J	463	920	921	858	662	0.370	9.76	9.74	10.80	11.36	11.48	11.91	11.11	10.12	11.32	12.56
ARMCX3	ATP5J	557	985	793	887	695	0.504	10.37	9.74	11.74	11.36	10.85	11.91	11.43	10.12	10.96	12.56
ATP1A1	ATP5J	402	883	850	788	92	0.447	12.75	9.74	14.66	11.36	12.79	11.91	15.05	10.12	12.75	12.56
AARS	ATP5L	456	932	964	909	731	0.328	10.69	11.23	13.64	11.58	12.72	11.61	12.45	11.14	12.26	12.13
ACSL3	ATP5L	666	963	918	953	737	0.289	10.77	11.23	12.05	11.58	11.59	11.61	11.44	11.14	11.42	12.13
ACTR1A	ATP5L	816	962	988	985	528	0.290	12.69	11.23	13.19	11.58	11.53	11.61	12.55	11.14	13.28	12.13
ADAM9	ATP5L	567	843	946	862	540	0.289	11.05	11.23	10.09	11.58	9.58	11.61	12.86	11.14	11.22	12.13
AKAP11	ATP5L	713	962	893	877	407	0.432	9.71	11.23	12.22	11.58	10.48	11.61	11.26	11.14	10.48	12.13
ALDOA	ATP5L	610	959	940	977	805	0.261	16.43	11.23	16.81	11.58	13.08	11.61	14.97	11.14	17.22	12.13
ANKH	ATP5L	206	954	833	856	747	0.440	10.99	11.23	12.55	11.58	11.70	11.61	10.76	11.14	12.06	12.13
ANXA6	ATP5L	575	932	986	863	892	0.233	13.34	11.23	13.41	11.58	13.42	11.61	13.49	11.14	13.33	12.13
AP2B1	ATP5L	839	959	990	979	838	0.120	12.77	11.23	14.15	11.58	11.74	11.61	13.34	11.14	12.61	12.13
AP2M1	ATP5L	831	972	1000	998	861	0.126	13.46	11.23	14.96	11.58	12.91	11.61	13.65	11.14	12.83	12.13
APMAP	ATP5L	699	962	912	999	292	0.388	13.88	11.23	11.98	11.58	14.10	11.61	11.96	11.14	10.81	12.13
ARF1	ATP5L	751	986	978	983	818	0.207	14.33	11.23	14.00	11.58	13.87	11.61	14.52	11.14	13.66	12.13
ARF3	ATP5L	695	995	997	986	623	0.341	12.71	11.23	14.56	11.58	11.49	11.61	12.91	11.14	9.96	12.13
ARFGEF2	ATP5L	583	944	937	912	633	0.355	9.76	11.23	10.80	11.58	11.48	11.61	11.11	11.14	11.32	12.13
ARIH1	ATP5L	537	963	979	871	757	0.362	11.38	11.23	10.78	11.58	10.92	11.61	11.48	11.14	12.18	12.13
ARMC8	ATP5L	839	944	954	962	519	0.265	10.86	11.23	10.63	11.58	10.13	11.61	10.71	11.14	11.90	12.13
ARMCX3	ATP5L	666	983	858	880	792	0.368	10.37	11.23	11.74	11.58	10.85	11.61	11.43	11.14	10.96	12.13
ARPC1A	ATP5L	811	998	998	1000	900	0.142	11.15	11.23	11.85	11.58	11.65	11.61	11.56	11.14	10.75	12.13
ATP1A1	ATP5L	541	924	947	833	50	0.449	12.75	11.23	14.66	11.58	12.79	11.61	15.05	11.14	12.75	12.13
ATP2B1	ATP5L	432	923	866	677	580	0.534	11.12	11.23	12.96	11.58	10.17	11.61	10.84	11.14	11.09	12.13
ACSL3	ATP5O	646	951	855	962	701	0.326	10.77	11.11	12.05	12.41	11.59	12.08	11.44	11.48	11.42	13.30
ANKH	ATP5O	192	963	825	796	894	0.418	10.99	11.11	12.55	12.41	11.70	12.08	10.76	11.48	12.06	13.30
ANKRD17	ATP5O	675	915	950	933	368	0.328	11.01	11.11	12.06	12.41	11.84	12.08	12.00	11.48	12.31	13.30
ANXA6	ATP5O	687	960	954	922	919	0.179	13.34	11.11	13.41	12.41	13.42	12.08	13.49	11.48	13.33	13.30
APLP2	ATP5O	626	958	957	954	471	0.398	14.29	11.11	14.14	12.41	14.20	12.08	15.53	11.48	12.35	13.30
ARF3	ATP5O	740	996	988	969	525	0.381	12.71	11.11	14.56	12.41	11.49	12.08	12.91	11.48	9.96	13.30
ARFGEF2	ATP5O	581	953	912	886	474	0.467	9.76	11.11	10.80	12.41	11.48	12.08	11.11	11.48	11.32	13.30
ARIH1	ATP5O	529	971	953	866	643	0.447	11.38	11.11	10.78	12.41	10.92	12.08	11.48	11.48	12.18	13.30
ARL6IP5	ATP5O	858	961	894	973	814	0.159	12.49	11.11	12.08	12.41	10.83	12.08	12.39	11.48	12.76	13.30
ARL8B	ATP5O	871	980	959	990	76	0.305	11.52	11.11	12.09	12.41	11.22	12.08	11.90	11.48	12.57	13.30
ARMCX3	ATP5O	631	990	801	909	732	0.444	10.37	11.11	11.74	12.41	10.85	12.08	11.43	11.48	10.96	13.30
ATF2	ATP5O	693	930	809	906	620	0.346	10.21	11.11	10.69	12.41	10.69	12.08	10.45	11.48	10.28	13.30
AASDHPPT	ATP6AP1	626	903	901	908	938	0.140	9.13	13.29	10.72	13.19	10.05	11.67	8.97	13.09	10.52	11.37
ABHD10	ATP6AP1	506	958	439	832	934	0.530	9.39	13.29	10.13	13.19	10.64	11.67	8.78	13.09	9.44	11.37
ACAT2	ATP6AP1	595	957	698	957	952	0.313	9.24	13.29	9.59	13.19	11.06	11.67	9.07	13.09	7.47	11.37
ACBD6	ATP6AP1	722	994	974	973	999	0.157	9.47	13.29	9.15	13.19	8.86	11.67	9.20	13.09	9.75	11.37
ACOT7	ATP6AP1	283	1000	883	973	889	0.378	8.95	13.29	12.56	13.19	9.34	11.67	9.09	13.09	7.77	11.37
ACTR6	ATP6AP1	346	908	966	904	980	0.206	8.33	13.29	9.81	13.19	9.19	11.67	8.59	13.09	9.37	11.37
ACYP1	ATP6AP1	288	894	639	736	965	0.404	7.01	13.29	8.42	13.19	6.82	11.67	7.49	13.09	8.69	11.37
ACYP2	ATP6AP1	688	846	910	881	873	0.079	8.11	13.29	10.27	13.19	8.97	11.67	7.23	13.09	11.38	11.37
AFG3L2	ATP6AP1	630	991	988	979	844	0.262	9.57	13.29	10.17	13.19	10.61	11.67	9.71	13.09	12.40	11.37
AGGF1	ATP6AP1	581	907	1000	902	932	0.166	9.68	13.29	10.40	13.19	9.83	11.67	9.49	13.09	10.24	11.37
AKAP11	ATP6AP1	397	911	945	718	882	0.317	9.71	13.29	12.22	13.19	10.48	11.67	11.26	13.09	10.48	11.37
AMN1	ATP6AP1	672	955	998	840	863	0.245	8.84	13.29	8.55	13.19	5.90	11.67	6.21	13.09	8.60	11.37
ANAPC1	ATP6AP1	545	975	995	943	963	0.237	9.84	13.29	9.97	13.19	9.78	11.67	9.80	13.09	10.50	11.37
ANKMY2	ATP6AP1	579	974	773	712	846	0.493	8.70	13.29	10.40	13.19	9.01	11.67	8.93	13.09	9.78	11.37
ANKRD46	ATP6AP1	427	929	317	608	790	0.659	7.77	13.29	10.73	13.19	10.25	11.67	8.45	13.09	10.73	11.37
APEX1	ATP6AP1	643	970	995	993	914	0.192	11.34	13.29	11.28	13.19	11.78	11.67	11.57	13.09	11.78	11.37
APOO	ATP6AP1	659	979	993	914	804	0.280	8.02	13.29	9.77	13.19	8.10	11.67	6.73	13.09	9.50	11.37
ARFGEF2	ATP6AP1	451	941	981	961	805	0.288	9.76	13.29	10.80	13.19	11.48	11.67	11.11	13.09	11.32	11.37
ARL1	ATP6AP1	517	963	969	918	992	0.245	9.11	13.29	11.04	13.19	11.31	11.67	10.95	13.09	11.27	11.37
ARL3	ATP6AP1	728	935	995	910	999	0.116	9.35	13.29	11.61	13.19	8.63	11.67	9.59	13.09	9.10	11.37
ARMC10	ATP6AP1	585	929	990	906	908	0.194	9.66	13.29	10.38	13.19	10.14	11.67	9.77	13.09	9.69	11.37
ARPC5L	ATP6AP1	704	998	906	874	918	0.295	10.88	13.29	11.60	13.19	10.90	11.67	10.85	13.09	11.00	11.37
ARPP19	ATP6AP1	754	912	977	879	814	0.144	11.60	13.29	13.95	13.19	11.53	11.67	12.49	13.09	13.18	11.37
ATAD1	ATP6AP1	527	904	947	884	875	0.213	9.64	13.29	10.63	13.19	10.56	11.67	10.49	13.09	11.53	11.37
ATG5	ATP6AP1	549	955	989	878	947	0.245	9.57	13.29	9.66	13.19	10.07	11.67	9.73	13.09	10.25	11.37
ATMIN	ATP6AP1	643	892	960	935	934	0.124	9.96	13.29	11.54	13.19	10.71	11.67	10.19	13.09	11.26	11.37
ATP5A1	ATP6AP1	800	988	987	998	810	0.183	12.98	13.29	14.59	13.19	14.03	11.67	13.65	13.09	15.13	11.37
ATP5G3	ATP6AP1	762	1000	983	999	638	0.309	11.42	13.29	12.34	13.19	13.03	11.67	11.62	13.09	13.28	11.37
ATP5H	ATP6AP1	783	975	990	996	941	0.113	10.99	13.29	11.77	13.19	11.93	11.67	11.03	13.09	12.93	11.37
ATP5J	ATP6AP1	532	933	977	982	838	0.248	9.74	13.29	11.36	13.19	11.91	11.67	10.12	13.09	12.56	11.37
ATP5L	ATP6AP1	631	951	995	991	956	0.160	11.23	13.29	11.58	13.19	11.61	11.67	11.14	13.09	12.13	11.37
ATP5O	ATP6AP1	633	968	984	977	894	0.204	11.11	13.29	12.41	13.19	12.08	11.67	11.48	13.09	13.30	11.37
ACADSB	ATP6AP2	941	954	53	878	104	0.498	8.48	12.10	10.49	12.38	14.23	11.55	9.76	12.27	11.81	10.23
ACAT2	ATP6AP2	864	963	692	844	911	0.271	9.24	12.10	9.59	12.38	11.06	11.55	9.07	12.27	7.47	10.23
ACOT13	ATP6AP2	889	897	730	929	801	0.136	9.36	12.10	9.23	12.38	10.76	11.55	8.25	12.27	10.11	10.23
ADK	ATP6AP2	719	986	856	974	913	0.241	9.38	12.10	8.69	12.38	11.59	11.55	9.31	12.27	9.63	10.23
AFG3L2	ATP6AP2	903	996	991	966	715	0.204	9.57	12.10	10.17	12.38	10.61	11.55	9.71	12.27	12.40	10.23
AIMP2	ATP6AP2	878	865	952	843	734	0.076	8.43	12.10	6.79	12.38	8.54	11.55	7.07	12.27	10.85	10.23
AK6	ATP6AP2	101	108	96	50	47	0.000	0.00	12.10	0.00	12.38	0.00	11.55	0.00	12.27	0.00	10.23
AMN1	ATP6AP2	860	1000	985	919	894	0.171	8.84	12.10	8.55	12.38	5.90	11.55	6.21	12.27	8.60	10.23
ANAPC1	ATP6AP2	752	982	995	990	896	0.158	9.84	12.10	9.97	12.38	9.78	11.55	9.80	12.27	10.50	10.23
ANAPC7	ATP6AP2	927	979	963	910	996	0.069	10.64	12.10	10.89	12.38	10.54	11.55	10.46	12.27	11.06	10.23
ANKRD46	ATP6AP2	955	1000	533	870	377	0.571	7.77	12.10	10.73	12.38	10.25	11.55	8.45	12.27	10.73	10.23
AP2A2	ATP6AP2	850	951	928	925	990	0.075	11.52	12.10	12.91	12.38	12.19	11.55	12.23	12.27	11.17	10.23
AP3M2	ATP6AP2	539	999	759	817	859	0.511	9.51	12.10	11.41	12.38	8.40	11.55	10.06	12.27	9.31	10.23
APEX1	ATP6AP2	770	973	959	953	978	0.118	11.34	12.10	11.28	12.38	11.78	11.55	11.57	12.27	11.78	10.23
ATP2A2	ATP6AP2	973	1000	962	947	31	0.309	11.26	12.10	13.85	12.38	13.40	11.55	13.45	12.27	16.43	10.23
ATP5J	ATP6AP2	818	987	964	993	472	0.340	9.74	12.10	11.36	12.38	11.91	11.55	10.12	12.27	12.56	10.23
ATP5L	ATP6AP2	837	992	981	990	724	0.218	11.23	12.10	11.58	12.38	11.61	11.55	11.14	12.27	12.13	10.23
AACS	ATP6V0A1	694	1000	964	868	429	0.487	9.30	11.61	11.54	13.73	8.69	11.24	9.50	11.48	9.15	12.41
ABHD14A	ATP6V0A1	522	969	596	743	13	0.757	8.84	11.61	10.56	13.73	8.95	11.24	7.80	11.48	9.20	12.41
AFG3L2	ATP6V0A1	644	1000	933	816	764	0.421	9.57	11.61	10.17	13.73	10.61	11.24	9.71	11.48	12.40	12.41
ANXA6	ATP6V0A1	638	1000	802	715	374	0.672	13.34	11.61	13.41	13.73	13.42	11.24	13.49	11.48	13.33	12.41
AP1S1	ATP6V0A1	677	999	812	759	709	0.519	9.29	11.61	11.58	13.73	10.01	11.24	8.75	11.48	8.04	12.41
APOA1BP	ATP6V0A1	602	924	903	851	789	0.276	10.28	11.61	10.83	13.73	11.06	11.24	10.15	11.48	10.64	12.41
ARFIP2	ATP6V0A1	818	1000	923	956	976	0.164	10.53	11.61	10.86	13.73	11.02	11.24	10.59	11.48	9.79	12.41
AASDHPPT	ATP6V0B	693	906	777	869	689	0.298	9.13	13.65	10.72	12.20	10.05	12.06	8.97	12.02	10.52	11.51
ANKH	ATP6V0B	18	987	789	694	55	0.733	10.99	13.65	12.55	12.20	11.70	12.06	10.76	12.02	12.06	11.51
ANKMY2	ATP6V0B	504	952	450	696	95	0.804	8.70	13.65	10.40	12.20	9.01	12.06	8.93	12.02	9.78	11.51
ANKRD13C	ATP6V0B	202	931	878	859	822	0.333	8.77	13.65	9.68	12.20	9.19	12.06	9.41	12.02	10.03	11.51
ANKRD46	ATP6V0B	495	915	133	592	345	0.784	7.77	13.65	10.73	12.20	10.25	12.06	8.45	12.02	10.73	11.51
ANXA6	ATP6V0B	175	998	818	725	400	0.725	13.34	13.65	13.41	12.20	13.42	12.06	13.49	12.02	13.33	11.51
AP3M2	ATP6V0B	61	971	814	704	520	0.673	9.51	13.65	11.41	12.20	8.40	12.06	10.06	12.02	9.31	11.51
ARFGEF2	ATP6V0B	130	906	906	852	867	0.249	9.76	13.65	10.80	12.20	11.48	12.06	11.11	12.02	11.32	11.51
ATF2	ATP6V0B	441	856	853	713	841	0.259	10.21	13.65	10.69	12.20	10.69	12.06	10.45	12.02	10.28	11.51
ATP2C1	ATP6V0B	638	939	952	920	943	0.160	10.58	13.65	11.86	12.20	10.80	12.06	12.00	12.02	11.05	11.51
AASDHPPT	ATP6V0C	139	763	820	769	625	0.201	9.13	14.12	10.72	14.26	10.05	12.30	8.97	12.91	10.52	12.61
ABHD10	ATP6V0C	118	800	322	650	418	0.525	9.39	14.12	10.13	14.26	10.64	12.30	8.78	12.91	9.44	12.61
ACOT7	ATP6V0C	340	999	880	929	877	0.405	8.95	14.12	12.56	14.26	9.34	12.30	9.09	12.91	7.77	12.61
ACTR10	ATP6V0C	206	877	993	835	640	0.328	10.67	14.12	11.18	14.26	10.08	12.30	10.38	12.91	10.76	12.61
ADAR	ATP6V0C	340	829	910	813	787	0.194	14.06	14.12	13.41	14.26	13.21	12.30	13.65	12.91	11.51	12.61
AFG3L2	ATP6V0C	216	919	996	907	860	0.245	9.57	14.12	10.17	14.26	10.61	12.30	9.71	12.91	12.40	12.61
AGGF1	ATP6V0C	102	741	977	732	751	0.125	9.68	14.12	10.40	14.26	9.83	12.30	9.49	12.91	10.24	12.61
AGK	ATP6V0C	142	776	556	437	703	0.422	9.76	14.12	10.56	14.26	10.09	12.30	9.99	12.91	9.39	12.61
AKAP11	ATP6V0C	63	761	888	534	624	0.312	9.71	14.12	12.22	14.26	10.48	12.30	11.26	12.91	10.48	12.61
AKTIP	ATP6V0C	236	743	886	770	688	0.149	10.10	14.12	11.35	14.26	9.95	12.30	9.76	12.91	11.55	12.61
ANAPC1	ATP6V0C	212	792	982	810	679	0.203	9.84	14.12	9.97	14.26	9.78	12.30	9.80	12.91	10.50	12.61
ANAPC7	ATP6V0C	363	876	943	818	863	0.224	10.64	14.12	10.89	14.26	10.54	12.30	10.46	12.91	11.06	12.61
ANKH	ATP6V0C	249	890	823	715	391	0.511	10.99	14.12	12.55	14.26	11.70	12.30	10.76	12.91	12.06	12.61
ANKMY2	ATP6V0C	157	840	468	523	352	0.668	8.70	14.12	10.40	14.26	9.01	12.30	8.93	12.91	9.78	12.61
ANKRD39	ATP6V0C	345	929	751	677	500	0.644	8.37	14.12	8.42	14.26	8.37	12.30	7.01	12.91	13.32	12.61
ANXA6	ATP6V0C	496	987	935	670	690	0.577	13.34	14.12	13.41	14.26	13.42	12.30	13.49	12.91	13.33	12.61
AP3M2	ATP6V0C	189	905	731	509	507	0.686	9.51	14.12	11.41	14.26	8.40	12.30	10.06	12.91	9.31	12.61
APOO	ATP6V0C	435	940	996	861	634	0.412	8.02	14.12	9.77	14.26	8.10	12.30	6.73	12.91	9.50	12.61
ARHGEF3	ATP6V0C	153	939	470	498	564	0.846	10.98	14.12	10.85	14.26	7.58	12.30	10.63	12.91	9.47	12.61
ARL3	ATP6V0C	322	854	973	851	908	0.178	9.35	14.12	11.61	14.26	8.63	12.30	9.59	12.91	9.10	12.61
ATF2	ATP6V0C	166	678	796	603	763	0.127	10.21	14.12	10.69	14.26	10.69	12.30	10.45	12.91	10.28	12.61
ATG5	ATP6V0C	131	814	971	803	891	0.163	9.57	14.12	9.66	14.26	10.07	12.30	9.73	12.91	10.25	12.61
ATP1A1	ATP6V0C	547	980	996	921	434	0.486	12.75	14.12	14.66	14.26	12.79	12.30	15.05	12.91	12.75	12.61
ATP2B1	ATP6V0C	173	883	875	539	735	0.442	11.12	14.12	12.96	14.26	10.17	12.30	10.84	12.91	11.09	12.61
ATP5A1	ATP6V0C	390	927	991	950	594	0.380	12.98	14.12	14.59	14.26	14.03	12.30	13.65	12.91	15.13	12.61
ATP5C1	ATP6V0C	228	915	988	947	763	0.283	11.21	14.12	11.93	14.26	12.64	12.30	11.58	12.91	13.26	12.61
ATP5G3	ATP6V0C	419	987	996	988	474	0.487	11.42	14.12	12.34	14.26	13.03	12.30	11.62	12.91	13.28	12.61
ATP5H	ATP6V0C	553	969	998	989	929	0.228	10.99	14.12	11.77	14.26	11.93	12.30	11.03	12.91	12.93	12.61
ATP5J	ATP6V0C	266	859	979	956	788	0.215	9.74	14.12	11.36	14.26	11.91	12.30	10.12	12.91	12.56	12.61
ATP5L	ATP6V0C	402	899	998	985	866	0.216	11.23	14.12	11.58	14.26	11.61	12.30	11.14	12.91	12.13	12.61
ATP5O	ATP6V0C	334	890	994	925	734	0.273	11.11	14.12	12.41	14.26	12.08	12.30	11.48	12.91	13.30	12.61
AAK1	ATP6V0D1	66	992	852	49	666	0.725	9.20	13.64	12.16	12.71	7.27	11.55	7.95	12.10	9.38	12.12
AASDHPPT	ATP6V0D1	533	877	931	921	917	0.172	9.13	13.64	10.72	12.71	10.05	11.55	8.97	12.10	10.52	12.12
ABHD10	ATP6V0D1	481	947	565	807	723	0.597	9.39	13.64	10.13	12.71	10.64	11.55	8.78	12.10	9.44	12.12
ACAT2	ATP6V0D1	491	964	681	974	673	0.519	9.24	13.64	9.59	12.71	11.06	11.55	9.07	12.10	7.47	12.12
AFG3L2	ATP6V0D1	318	999	994	992	864	0.323	9.57	13.64	10.17	12.71	10.61	11.55	9.71	12.10	12.40	12.12
AKAP11	ATP6V0D1	111	900	874	599	850	0.389	9.71	13.64	12.22	12.71	10.48	11.55	11.26	12.10	10.48	12.12
AMN1	ATP6V0D1	873	970	945	709	908	0.223	8.84	13.64	8.55	12.71	5.90	11.55	6.21	12.10	8.60	12.12
ANAPC1	ATP6V0D1	140	974	991	913	858	0.326	9.84	13.64	9.97	12.71	9.78	11.55	9.80	12.10	10.50	12.12
ANKMY2	ATP6V0D1	332	977	619	598	494	0.846	8.70	13.64	10.40	12.71	9.01	11.55	8.93	12.10	9.78	12.12
AP3M2	ATP6V0D1	36	998	727	443	807	0.729	9.51	13.64	11.41	12.71	8.40	11.55	10.06	12.10	9.31	12.12
ARFGEF2	ATP6V0D1	59	917	987	862	799	0.295	9.76	13.64	10.80	12.71	11.48	11.55	11.11	12.10	11.32	12.12
ARFIP2	ATP6V0D1	547	1000	897	962	952	0.321	10.53	13.64	10.86	12.71	11.02	11.55	10.59	12.10	9.79	12.12
ARL3	ATP6V0D1	973	951	936	820	978	0.073	9.35	13.64	11.61	12.71	8.63	11.55	9.59	12.10	9.10	12.12
ATG5	ATP6V0D1	500	946	984	866	947	0.263	9.57	13.64	9.66	12.71	10.07	11.55	9.73	12.10	10.25	12.12
ATP5J	ATP6V0D1	707	934	964	979	699	0.231	9.74	13.64	11.36	12.71	11.91	11.55	10.12	12.10	12.56	12.12
ATP5L	ATP6V0D1	666	945	988	985	873	0.175	11.23	13.64	11.58	12.71	11.61	11.55	11.14	12.10	12.13	12.12
ATP5O	ATP6V0D1	652	976	973	973	682	0.312	11.11	13.64	12.41	12.71	12.08	11.55	11.48	12.10	13.30	12.12
ANKIB1	ATP6V0E1	152	682	935	860	919	0.091	9.71	13.70	10.84	10.28	9.91	12.07	10.49	12.66	10.24	11.79
ATP6V0B	ATP6V0E2	347	956	45	823	249	0.750	13.65	9.72	12.20	13.70	12.06	11.53	12.02	8.21	11.51	8.87
ATP6V0C	ATP6V0E2	254	969	63	822	573	0.741	14.12	9.72	14.26	13.70	12.30	11.53	12.91	8.21	12.61	8.87
ACAT2	ATP6V1A	622	965	770	987	859	0.322	9.24	11.71	9.59	12.61	11.06	11.30	9.07	11.06	7.47	9.74
ACVR2A	ATP6V1A	561	981	851	869	999	0.331	7.85	11.71	8.40	12.61	8.92	11.30	8.82	11.06	9.23	9.74
ADSL	ATP6V1A	813	984	993	985	656	0.249	10.59	11.71	9.07	12.61	10.19	11.30	9.86	11.06	12.92	9.74
AFG3L2	ATP6V1A	614	1000	999	997	794	0.298	9.57	11.71	10.17	12.61	10.61	11.30	9.71	11.06	12.40	9.74
ANKH	ATP6V1A	20	994	945	628	312	0.702	10.99	11.71	12.55	12.61	11.70	11.30	10.76	11.06	12.06	9.74
ARL3	ATP6V1A	980	965	963	839	912	0.090	9.35	11.71	11.61	12.61	8.63	11.30	9.59	11.06	9.10	9.74
ARPC5L	ATP6V1A	365	998	871	844	855	0.461	10.88	11.71	11.60	12.61	10.90	11.30	10.85	11.06	11.00	9.74
ATP5H	ATP6V1A	680	962	970	991	685	0.280	10.99	11.71	11.77	12.61	11.93	11.30	11.03	11.06	12.93	9.74
ATP5J	ATP6V1A	778	949	970	981	698	0.211	9.74	11.71	11.36	12.61	11.91	11.30	10.12	11.06	12.56	9.74
ATP5O	ATP6V1A	645	976	960	982	638	0.343	11.11	11.71	12.41	12.61	12.08	11.30	11.48	11.06	13.30	9.74
AACS	ATP6V1B2	216	1000	934	829	777	0.480	9.30	13.91	11.54	13.89	8.69	11.51	9.50	12.98	9.15	12.08
AAK1	ATP6V1B2	64	1000	918	478	917	0.583	9.20	13.91	12.16	13.89	7.27	11.51	7.95	12.98	9.38	12.08
ACAT2	ATP6V1B2	488	963	706	808	717	0.560	9.24	13.91	9.59	13.89	11.06	11.51	9.07	12.98	7.47	12.08
AFG3L2	ATP6V1B2	327	1000	991	904	966	0.320	9.57	13.91	10.17	13.89	10.61	11.51	9.71	12.98	12.40	12.08
ANKH	ATP6V1B2	8	989	925	735	107	0.648	10.99	13.91	12.55	13.89	11.70	11.51	10.76	12.98	12.06	12.08
ANKRD46	ATP6V1B2	527	995	437	663	610	0.840	7.77	13.91	10.73	13.89	10.25	11.51	8.45	12.98	10.73	12.08
ANXA6	ATP6V1B2	95	1000	936	818	591	0.578	13.34	13.91	13.41	13.89	13.42	11.51	13.49	12.98	13.33	12.08
APOO	ATP6V1B2	545	992	985	834	683	0.461	8.02	13.91	9.77	13.89	8.10	11.51	6.73	12.98	9.50	12.08
ARFIP2	ATP6V1B2	381	996	774	898	966	0.423	10.53	13.91	10.86	13.89	11.02	11.51	10.59	12.98	9.79	12.08
ARL3	ATP6V1B2	979	959	989	790	961	0.085	9.35	13.91	11.61	13.89	8.63	11.51	9.59	12.98	9.10	12.08
ARMCX3	ATP6V1B2	379	994	898	942	841	0.398	10.37	13.91	11.74	13.89	10.85	11.51	11.43	12.98	10.96	12.08
ARPC5L	ATP6V1B2	166	1000	894	882	911	0.406	10.88	13.91	11.60	13.89	10.90	11.51	10.85	12.98	11.00	12.08
ATP1B1	ATP6V1B2	44	1000	890	780	853	0.488	7.56	13.91	13.70	13.89	12.15	11.51	11.50	12.98	13.79	12.08
ATP5C1	ATP6V1B2	743	998	990	948	859	0.226	11.21	13.91	11.93	13.89	12.64	11.51	11.58	12.98	13.26	12.08
ATP5H	ATP6V1B2	721	970	993	947	846	0.198	10.99	13.91	11.77	13.89	11.93	11.51	11.03	12.98	12.93	12.08
ATP5J	ATP6V1B2	743	936	980	933	732	0.200	9.74	13.91	11.36	13.89	11.91	11.51	10.12	12.98	12.56	12.08
ATP5L	ATP6V1B2	645	949	991	927	867	0.204	11.23	13.91	11.58	13.89	11.61	11.51	11.14	12.98	12.13	12.08
ATP5O	ATP6V1B2	613	977	993	937	679	0.351	11.11	13.91	12.41	13.89	12.08	11.51	11.48	12.98	13.30	12.08
AACS	ATP6V1C1	165	1000	962	926	816	0.398	9.30	11.80	11.54	12.62	8.69	10.85	9.50	11.04	9.15	10.35
AAK1	ATP6V1C1	60	1000	917	248	878	0.603	9.20	11.80	12.16	12.62	7.27	10.85	7.95	11.04	9.38	10.35
ABHD14A	ATP6V1C1	38	920	689	793	186	0.599	8.84	11.80	10.56	12.62	8.95	10.85	7.80	11.04	9.20	10.35
AFG3L2	ATP6V1C1	376	1000	977	982	932	0.304	9.57	11.80	10.17	12.62	10.61	10.85	9.71	11.04	12.40	10.35
ANAPC1	ATP6V1C1	135	997	1000	998	961	0.267	9.84	11.80	9.97	12.62	9.78	10.85	9.80	11.04	10.50	10.35
ANXA6	ATP6V1C1	49	1000	877	864	637	0.561	13.34	11.80	13.41	12.62	13.42	10.85	13.49	11.04	13.33	10.35
AP2A2	ATP6V1C1	497	983	970	978	985	0.251	11.52	11.80	12.91	12.62	12.19	10.85	12.23	11.04	11.17	10.35
AP2S1	ATP6V1C1	532	981	981	937	910	0.282	11.67	11.80	11.54	12.62	11.29	10.85	10.76	11.04	10.67	10.35
AP3M2	ATP6V1C1	16	1000	822	771	883	0.512	9.51	11.80	11.41	12.62	8.40	10.85	10.06	11.04	9.31	10.35
ARL3	ATP6V1C1	987	976	953	911	978	0.044	9.35	11.80	11.61	12.62	8.63	10.85	9.59	11.04	9.10	10.35
ARL4C	ATP6V1C1	1	979	743	506	711	0.728	12.00	11.80	10.94	12.62	8.86	10.85	10.55	11.04	7.25	10.35
ATP5O	ATP6V1C1	614	981	981	989	544	0.402	11.11	11.80	12.41	12.62	12.08	10.85	11.48	11.04	13.30	10.35
ATP6V0C	ATP6V1C1	224	917	994	898	844	0.255	14.12	11.80	14.26	12.62	12.30	10.85	12.91	11.04	12.61	10.35
ACO2	ATP6V1D	217	831	989	986	897	0.166	10.98	10.94	13.28	11.92	11.13	10.07	10.79	10.13	14.13	11.05
ANKRD17	ATP6V1D	761	973	969	924	798	0.220	11.01	10.94	12.06	11.92	11.84	10.07	12.00	10.13	12.31	11.05
ANXA6	ATP6V1D	306	997	953	879	877	0.390	13.34	10.94	13.41	11.92	13.42	10.07	13.49	10.13	13.33	11.05
AP2M1	ATP6V1D	794	1000	1000	973	989	0.122	13.46	10.94	14.96	11.92	12.91	10.07	13.65	10.13	12.83	11.05
ARF1	ATP6V1D	765	997	990	915	950	0.184	14.33	10.94	14.00	11.92	13.87	10.07	14.52	10.13	13.66	11.05
ARIH1	ATP6V1D	424	982	991	751	973	0.361	11.38	10.94	10.78	11.92	10.92	10.07	11.48	10.13	12.18	11.05
ATP6V0C	ATP6V1D	398	919	1000	926	893	0.223	14.12	10.94	14.26	11.92	12.30	10.07	12.91	10.13	12.61	11.05
ADAR	ATP6V1E1	963	986	942	927	788	0.162	14.06	12.33	13.41	13.63	13.21	11.12	13.65	12.27	11.51	12.65
AKAP9	ATP6V1E1	453	870	381	752	446	0.614	10.40	12.33	11.00	13.63	12.22	11.12	11.83	12.27	12.01	12.65
ANXA6	ATP6V1E1	395	1000	943	866	509	0.591	13.34	12.33	13.41	13.63	13.42	11.12	13.49	12.27	13.33	12.65
APOOL	ATP6V1E1	411	668	974	914	646	0.095	5.70	12.33	4.11	13.63	6.92	11.12	4.98	12.27	7.81	12.65
ARFIP2	ATP6V1E1	737	999	869	970	966	0.227	10.53	12.33	10.86	13.63	11.02	11.12	10.59	12.27	9.79	12.65
ARMCX3	ATP6V1E1	560	992	961	830	760	0.428	10.37	12.33	11.74	13.63	10.85	11.12	11.43	12.27	10.96	12.65
ATP6V0A1	ATP6V1E1	852	1000	964	916	922	0.173	11.61	12.33	13.73	13.63	11.24	11.12	11.48	12.27	12.41	12.65
ADAR	ATP6V1F	601	885	898	803	839	0.206	14.06	11.65	13.41	12.12	13.21	10.01	13.65	11.09	11.51	11.04
AFG3L2	ATP6V1F	777	918	974	941	767	0.146	9.57	11.65	10.17	12.12	10.61	10.01	9.71	11.09	12.40	11.04
AKAP11	ATP6V1F	496	842	905	618	558	0.425	9.71	11.65	12.22	12.12	10.48	10.01	11.26	11.09	10.48	11.04
AKTIP	ATP6V1F	558	893	940	845	781	0.247	10.10	11.65	11.35	12.12	9.95	10.01	9.76	11.09	11.55	11.04
ANKH	ATP6V1F	169	918	762	698	500	0.606	10.99	11.65	12.55	12.12	11.70	10.01	10.76	11.09	12.06	11.04
ANKMY2	ATP6V1F	608	911	673	659	476	0.602	8.70	11.65	10.40	12.12	9.01	10.01	8.93	11.09	9.78	11.04
ANKRD46	ATP6V1F	561	876	165	590	479	0.676	7.77	11.65	10.73	12.12	10.25	10.01	8.45	11.09	10.73	11.04
AP2A2	ATP6V1F	922	967	968	934	905	0.070	11.52	11.65	12.91	12.12	12.19	10.01	12.23	11.09	11.17	11.04
AP3M2	ATP6V1F	424	920	872	506	671	0.566	9.51	11.65	11.41	12.12	8.40	10.01	10.06	11.09	9.31	11.04
ARFIP2	ATP6V1F	970	981	855	921	940	0.119	10.53	11.65	10.86	12.12	11.02	10.01	10.59	11.09	9.79	11.04
ARL3	ATP6V1F	766	961	986	878	868	0.185	9.35	11.65	11.61	12.12	8.63	10.01	9.59	11.09	9.10	11.04
ATAD1	ATP6V1F	565	855	926	782	812	0.203	9.64	11.65	10.63	12.12	10.56	10.01	10.49	11.09	11.53	11.04
ATG5	ATP6V1F	675	913	971	863	871	0.165	9.57	11.65	9.66	12.12	10.07	10.01	9.73	11.09	10.25	11.04
ATP5A1	ATP6V1F	956	966	983	986	704	0.136	12.98	11.65	14.59	12.12	14.03	10.01	13.65	11.09	15.13	11.04
ATP6V1A	ATP6V1F	541	922	960	976	764	0.270	11.71	11.65	12.61	12.12	11.30	10.01	11.06	11.09	9.74	11.04
ALDOA	ATP6V1G1	462	896	976	984	509	0.392	16.43	11.16	16.81	10.88	13.08	11.23	14.97	11.29	17.22	11.40
ANKRD17	ATP6V1G1	893	883	971	979	850	0.017	11.01	11.16	12.06	10.88	11.84	11.23	12.00	11.29	12.31	11.40
ANXA6	ATP6V1G1	512	833	877	835	820	0.167	13.34	11.16	13.41	10.88	13.42	11.23	13.49	11.29	13.33	11.40
ATP1A1	ATP6V1G1	565	885	967	919	258	0.352	12.75	11.16	14.66	10.88	12.79	11.23	15.05	11.29	12.75	11.40
ATP6V1B2	ATP6V1G1	768	882	997	957	992	0.057	13.91	11.16	13.89	10.88	11.51	11.23	12.98	11.29	12.08	11.40
AAK1	ATP6V1H	478	999	912	95	607	0.739	9.20	10.60	12.16	12.47	7.27	9.57	7.95	10.43	9.38	10.79
ACOT7	ATP6V1H	230	997	953	980	736	0.409	8.95	10.60	12.56	12.47	9.34	9.57	9.09	10.43	7.77	10.79
AMN1	ATP6V1H	870	990	975	862	906	0.173	8.84	10.60	8.55	12.47	5.90	9.57	6.21	10.43	8.60	10.79
ARHGEF9	ATP6V1H	637	1000	533	922	881	0.513	9.21	10.60	13.15	12.47	8.97	9.57	9.44	10.43	8.78	10.79
ARL3	ATP6V1H	938	989	985	948	954	0.066	9.35	10.60	11.61	12.47	8.63	9.57	9.59	10.43	9.10	10.79
ATP2B1	ATP6V1H	482	999	828	521	871	0.638	11.12	10.60	12.96	12.47	10.17	9.57	10.84	10.43	11.09	10.79
AKT2	ATP8B1	501	350	686	820	330	0.000	12.55	5.63	12.12	6.48	13.25	9.75	12.27	10.12	13.26	8.07
ACO2	ATP9A	43	807	791	738	70	0.349	10.98	10.04	13.28	13.69	11.13	10.40	10.79	10.48	14.13	11.40
ATP5C1	ATP9A	604	998	673	688	185	0.763	11.21	10.04	11.93	13.69	12.64	10.40	11.58	10.48	13.26	11.40
ATP5H	ATP9A	517	968	646	558	145	0.826	10.99	10.04	11.77	13.69	11.93	10.40	11.03	10.48	12.93	11.40
ATP5O	ATP9A	430	986	620	716	72	0.804	11.11	10.04	12.41	13.69	12.08	10.40	11.48	10.48	13.30	11.40
ATP6V0B	ATP9A	823	968	866	442	392	0.592	13.65	10.04	12.20	13.69	12.06	10.40	12.02	10.48	11.51	11.40
ATP6V1A	ATP9A	927	1000	855	502	504	0.606	11.71	10.04	12.61	13.69	11.30	10.40	11.06	10.48	9.74	11.40
ATP6V1F	ATP9A	387	928	778	483	411	0.717	11.65	10.04	12.12	13.69	10.01	10.40	11.09	10.48	11.04	11.40
ARF3	ATPAF1	921	950	977	916	329	0.257	12.71	9.86	14.56	12.33	11.49	11.43	12.91	9.78	9.96	12.53
ATP2B1	ATPAF1	550	809	781	451	694	0.355	11.12	9.86	12.96	12.33	10.17	11.43	10.84	9.78	11.09	12.53
ATP6AP2	ATPAF1	959	959	963	968	333	0.230	12.10	9.86	12.38	12.33	11.55	11.43	12.27	9.78	10.23	12.53
ATP6V0D1	ATPAF1	752	766	942	964	613	0.084	13.64	9.86	12.71	12.33	11.55	11.43	12.10	9.78	12.12	12.53
ARL8B	ATPIF1	786	928	269	692	7	0.617	11.52	10.91	12.09	11.98	11.22	12.11	11.90	10.56	12.57	11.77
ATP6AP1	ATPIF1	717	994	466	729	919	0.555	13.29	10.91	13.19	11.98	11.67	12.11	13.09	10.56	11.37	11.77
ATP6AP2	ATPIF1	785	958	338	816	438	0.616	12.10	10.91	12.38	11.98	11.55	12.11	12.27	10.56	10.23	11.77
ATP6V0B	ATPIF1	622	992	185	778	363	0.784	13.65	10.91	12.20	11.98	12.06	12.11	12.02	10.56	11.51	11.77
ATP6V0D1	ATPIF1	506	990	411	684	768	0.751	13.64	10.91	12.71	11.98	11.55	12.11	12.10	10.56	12.12	11.77
ATP6V1E1	ATPIF1	790	987	289	812	310	0.673	12.33	10.91	13.63	11.98	11.12	12.11	12.27	10.56	12.65	11.77
AIG1	ATR	709	956	257	830	6	0.642	9.57	9.59	10.35	9.64	12.31	10.15	9.19	9.93	8.37	9.68
ATP5H	ATR	600	817	786	934	443	0.282	10.99	9.59	11.77	9.64	11.93	10.15	11.03	9.93	12.93	9.68
ATP5J	ATR	600	853	650	944	301	0.405	9.74	9.59	11.36	9.64	11.91	10.15	10.12	9.93	12.56	9.68
ATP6AP1	ATR	519	927	902	928	867	0.246	13.29	9.59	13.19	9.64	11.67	10.15	13.09	9.93	11.37	9.68
ABCE1	ATRN	905	931	744	872	934	0.136	9.41	9.75	9.86	11.74	10.65	12.25	10.36	10.87	11.08	10.97
ALDOA	ATRN	498	942	480	893	369	0.688	16.43	9.75	16.81	11.74	13.08	12.25	14.97	10.87	17.22	10.97
AP2S1	ATRN	510	951	845	879	906	0.332	11.67	9.75	11.54	11.74	11.29	12.25	10.76	10.87	10.67	10.97
ATP5H	ATRN	685	946	867	984	759	0.264	10.99	9.75	11.77	11.74	11.93	12.25	11.03	10.87	12.93	10.97
ATP5L	ATRN	609	954	906	987	770	0.288	11.23	9.75	11.58	11.74	11.61	12.25	11.14	10.87	12.13	10.97
ATP6V0B	ATRN	425	977	562	868	913	0.532	13.65	9.75	12.20	11.74	12.06	12.25	12.02	10.87	11.51	10.97
ATP6V0C	ATRN	301	899	801	857	845	0.296	14.12	9.75	14.26	11.74	12.30	12.25	12.91	10.87	12.61	10.97
ATP6V0D1	ATRN	393	991	876	958	978	0.326	13.64	9.75	12.71	11.74	11.55	12.25	12.10	10.87	12.12	10.97
ATP6V1B2	ATRN	356	1000	925	884	1000	0.345	13.91	9.75	13.89	11.74	11.51	12.25	12.98	10.87	12.08	10.97
ATP6V1D	ATRN	477	1000	855	968	983	0.347	10.94	9.75	11.92	11.74	10.07	12.25	10.13	10.87	11.05	10.97
ACTR1A	ATXN10	590	996	972	976	912	0.267	12.69	10.75	13.19	12.39	11.53	11.53	12.55	11.48	13.28	11.84
AKIRIN1	ATXN10	690	981	871	964	763	0.318	11.35	10.75	11.27	12.39	11.23	11.53	10.82	11.48	10.81	11.84
ALAS1	ATXN10	514	980	857	891	554	0.552	11.62	10.75	10.59	12.39	13.01	11.53	11.01	11.48	11.83	11.84
ALDOA	ATXN10	407	986	841	972	482	0.566	16.43	10.75	16.81	12.39	13.08	11.53	14.97	11.48	17.22	11.84
AP2B1	ATXN10	904	1000	995	995	999	0.053	12.77	10.75	14.15	12.39	11.74	11.53	13.34	11.48	12.61	11.84
AP2S1	ATXN10	659	976	983	929	986	0.182	11.67	10.75	11.54	12.39	11.29	11.53	10.76	11.48	10.67	11.84
ARF1	ATXN10	705	993	962	993	959	0.176	14.33	10.75	14.00	12.39	13.87	11.53	14.52	11.48	13.66	11.84
ARFIP2	ATXN10	975	992	743	991	866	0.197	10.53	10.75	10.86	12.39	11.02	11.53	10.59	11.48	9.79	11.84
ARPC2	ATXN10	506	1000	993	987	931	0.291	14.63	10.75	12.36	12.39	11.91	11.53	13.74	11.48	13.04	11.84
ARPC3	ATXN10	423	995	993	997	929	0.281	13.75	10.75	11.78	12.39	11.98	11.53	12.76	11.48	11.00	11.84
ATP2A2	ATXN10	937	993	922	932	184	0.341	11.26	10.75	13.85	12.39	13.40	11.53	13.45	11.48	16.43	11.84
ATP6AP1	ATXN10	574	983	992	969	997	0.211	13.29	10.75	13.19	12.39	11.67	11.53	13.09	11.48	11.37	11.84
ATP6V0C	ATXN10	223	906	987	911	831	0.240	14.12	10.75	14.26	12.39	12.30	11.53	12.91	11.48	12.61	11.84
ATP6V1A	ATXN10	521	1000	999	988	978	0.257	11.71	10.75	12.61	12.39	11.30	11.53	11.06	11.48	9.74	11.84
ATP6V1C1	ATXN10	294	1000	979	988	985	0.274	11.80	10.75	12.62	12.39	10.85	11.53	11.04	11.48	10.35	11.84
ATP6V1F	ATXN10	822	943	965	931	931	0.072	11.65	10.75	12.12	12.39	10.01	11.53	11.09	11.48	11.04	11.84
ACTR10	ATXN7L3B	925	1000	978	998	797	0.151	10.67	10.98	11.18	12.49	10.08	11.43	10.38	11.23	10.76	11.45
ACVR1B	ATXN7L3B	735	993	794	720	900	0.411	11.17	10.98	11.45	12.49	11.66	11.43	10.74	11.23	10.45	11.45
AP2S1	ATXN7L3B	508	972	958	853	881	0.344	11.67	10.98	11.54	12.49	11.29	11.43	10.76	11.23	10.67	11.45
AP3M2	ATXN7L3B	712	1000	807	794	827	0.430	9.51	10.98	11.41	12.49	8.40	11.43	10.06	11.23	9.31	11.45
ATP2B1	ATXN7L3B	789	996	808	659	987	0.370	11.12	10.98	12.96	12.49	10.17	11.43	10.84	11.23	11.09	11.45
ATP6AP2	ATXN7L3B	986	1000	978	988	947	0.051	12.10	10.98	12.38	12.49	11.55	11.43	12.27	11.23	10.23	11.45
ATP6V0B	ATXN7L3B	692	961	804	885	944	0.260	13.65	10.98	12.20	12.49	12.06	11.43	12.02	11.23	11.51	11.45
ATP6V1A	ATXN7L3B	916	1000	994	970	964	0.078	11.71	10.98	12.61	12.49	11.30	11.43	11.06	11.23	9.74	11.45
ATP6V1B2	ATXN7L3B	722	1000	984	856	992	0.223	13.91	10.98	13.89	12.49	11.51	11.43	12.98	11.23	12.08	11.45
ATP6V1C1	ATXN7L3B	730	1000	949	987	998	0.168	11.80	10.98	12.62	12.49	10.85	11.43	11.04	11.23	10.35	11.45
ATP6V1E1	ATXN7L3B	872	1000	881	995	979	0.137	12.33	10.98	13.63	12.49	11.12	11.43	12.27	11.23	12.65	11.45
AARS	AUH	334	985	803	576	677	0.692	10.69	8.85	13.64	9.37	12.72	9.70	12.45	8.57	12.26	9.66
ACAT2	AUH	801	969	895	542	808	0.415	9.24	8.85	9.59	9.37	11.06	9.70	9.07	8.57	7.47	9.66
ACLY	AUH	862	996	477	693	407	0.715	11.68	8.85	11.40	9.37	11.29	9.70	12.19	8.57	10.58	9.66
ACSL3	AUH	886	992	723	872	783	0.352	10.77	8.85	12.05	9.37	11.59	9.70	11.44	8.57	11.42	9.66
ACTR1A	AUH	741	990	738	879	541	0.530	12.69	8.85	13.19	9.37	11.53	9.70	12.55	8.57	13.28	9.66
ADAR	AUH	783	980	885	833	707	0.356	14.06	8.85	13.41	9.37	13.21	9.70	13.65	8.57	11.51	9.66
APMAP	AUH	769	990	709	853	252	0.565	13.88	8.85	11.98	9.37	14.10	9.70	11.96	8.57	10.81	9.66
ARCN1	AUH	890	993	757	814	638	0.436	12.15	8.85	11.54	9.37	12.35	9.70	12.52	8.57	11.67	9.66
ARHGEF7	AUH	840	981	708	815	786	0.388	11.16	8.85	12.80	9.37	11.77	9.70	12.22	8.57	12.19	9.66
ARIH1	AUH	853	998	862	910	674	0.346	11.38	8.85	10.78	9.37	10.92	9.70	11.48	8.57	12.18	9.66
ARL8B	AUH	981	998	712	863	141	0.468	11.52	8.85	12.09	9.37	11.22	9.70	11.90	8.57	12.57	9.66
ARMCX3	AUH	898	996	639	895	816	0.368	10.37	8.85	11.74	9.37	10.85	9.70	11.43	8.57	10.96	9.66
ATP1A1	AUH	562	991	589	549	23	0.882	12.75	8.85	14.66	9.37	12.79	9.70	15.05	8.57	12.75	9.66
ATP6AP1	AUH	759	987	828	830	966	0.282	13.29	8.85	13.19	9.37	11.67	9.70	13.09	8.57	11.37	9.66
ATP6V0D1	AUH	574	973	754	650	804	0.555	13.64	8.85	12.71	9.37	11.55	9.70	12.10	8.57	12.12	9.66
ATP6V1F	AUH	632	935	805	770	842	0.345	11.65	8.85	12.12	9.37	10.01	9.70	11.09	8.57	11.04	9.66
ABHD16A	AZIN1	581	870	921	905	529	0.315	12.08	11.79	10.78	12.26	11.23	11.96	10.70	11.80	10.93	11.51
ATP6V0C	AZIN1	330	768	939	849	635	0.201	14.12	11.79	14.26	12.26	12.30	11.96	12.91	11.80	12.61	11.51
ANKRD50	B3GALT6	802	862	281	636	736	0.387	8.87	9.31	8.50	9.63	9.23	9.68	10.30	8.61	8.45	9.29
AASDHPPT	B4GALT5	754	981	661	397	712	0.648	9.13	12.86	10.72	10.64	10.05	11.05	8.97	11.83	10.52	12.62
ANKMY2	B4GALT5	509	973	175	321	33	0.942	8.70	12.86	10.40	10.64	9.01	11.05	8.93	11.83	9.78	12.62
ANKRD46	B4GALT5	561	980	82	181	262	0.929	7.77	12.86	10.73	10.64	10.25	11.05	8.45	11.83	10.73	12.62
AP2A2	B4GALT5	505	979	753	433	695	0.732	11.52	12.86	12.91	10.64	12.19	11.05	12.23	11.83	11.17	12.62
AACS	BABAM1	798	999	887	939	845	0.264	9.30	11.65	11.54	11.68	8.69	10.88	9.50	10.58	9.15	11.69
AASDHPPT	BABAM1	490	917	955	973	910	0.212	9.13	11.65	10.72	11.68	10.05	10.88	8.97	10.58	10.52	11.69
AFG3L2	BABAM1	765	995	974	960	904	0.189	9.57	11.65	10.17	11.68	10.61	10.88	9.71	10.58	12.40	11.69
AKAP11	BABAM1	544	939	967	894	726	0.327	9.71	11.65	12.22	11.68	10.48	10.88	11.26	10.58	10.48	11.69
ALAS1	BABAM1	400	943	724	786	710	0.526	11.62	11.65	10.59	11.68	13.01	10.88	11.01	10.58	11.83	11.69
ALDOA	BABAM1	531	997	902	958	749	0.424	16.43	11.65	16.81	11.68	13.08	10.88	14.97	10.58	17.22	11.69
ANKMY2	BABAM1	598	976	848	925	806	0.363	8.70	11.65	10.40	11.68	9.01	10.88	8.93	10.58	9.78	11.69
ANKRD46	BABAM1	509	956	648	910	858	0.450	7.77	11.65	10.73	11.68	10.25	10.88	8.45	10.58	10.73	11.69
APBA2	BABAM1	549	1000	468	702	438	0.875	10.46	11.65	13.30	11.68	6.20	10.88	7.87	10.58	4.12	11.69
APLP2	BABAM1	248	925	987	930	866	0.242	14.29	11.65	14.14	11.68	14.20	10.88	15.53	10.58	12.35	11.69
ARL6IP5	BABAM1	377	956	953	956	910	0.253	12.49	11.65	12.08	11.68	10.83	10.88	12.39	10.58	12.76	11.69
ARL8B	BABAM1	426	945	969	945	446	0.445	11.52	11.65	12.09	11.68	11.22	10.88	11.90	10.58	12.57	11.69
ATF2	BABAM1	370	874	918	867	882	0.191	10.21	11.65	10.69	11.68	10.69	10.88	10.45	10.58	10.28	11.69
ATP1A1	BABAM1	645	990	901	723	118	0.596	12.75	11.65	14.66	11.68	12.79	10.88	15.05	10.58	12.75	11.69
ATP6AP2	BABAM1	413	980	988	968	824	0.324	12.10	11.65	12.38	11.68	11.55	10.88	12.27	10.58	10.23	11.69
ATP6V0C	BABAM1	542	989	996	952	992	0.242	14.12	11.65	14.26	11.68	12.30	10.88	12.91	10.58	12.61	11.69
ATP6V1A	BABAM1	150	993	989	954	828	0.350	11.71	11.65	12.61	11.68	11.30	10.88	11.06	10.58	9.74	11.69
ATP6V1B2	BABAM1	144	999	999	875	937	0.343	13.91	11.65	13.89	11.68	11.51	10.88	12.98	10.58	12.08	11.69
ATP6V1C1	BABAM1	100	996	994	982	909	0.299	11.80	11.65	12.62	11.68	10.85	10.88	11.04	10.58	10.35	11.69
ATR	BABAM1	544	874	808	943	733	0.269	9.59	11.65	9.64	11.68	10.15	10.88	9.93	10.58	9.68	11.69
ATXN7L3B	BABAM1	540	997	991	996	911	0.275	10.98	11.65	12.49	11.68	11.43	10.88	11.23	10.58	11.45	11.69
ATG3	BACE1	592	962	848	825	996	0.310	11.74	8.44	10.16	11.77	10.19	11.13	10.37	10.66	10.08	10.53
ASB1	BAG1	25	961	864	914	773	0.397	10.59	12.43	11.20	11.10	10.02	10.95	10.28	11.37	11.55	12.53
ABHD3	BAG3	34	836	696	288	97	0.574	10.59	10.13	7.86	10.80	10.57	10.72	9.42	11.79	9.50	14.54
AAK1	BAG4	562	991	220	506	760	0.818	9.20	9.60	12.16	10.30	7.27	9.99	7.95	8.48	9.38	8.91
AP2A2	BAG4	736	902	726	873	948	0.185	11.52	9.60	12.91	10.30	12.19	9.99	12.23	8.48	11.17	8.91
AP2S1	BAG4	556	871	592	685	833	0.409	11.67	9.60	11.54	10.30	11.29	9.99	10.76	8.48	10.67	8.91
ARHGEF9	BAG4	571	984	942	796	629	0.499	9.21	9.60	13.15	10.30	8.97	9.99	9.44	8.48	8.78	8.91
ATP1A1	BAG4	494	945	17	324	467	0.890	12.75	9.60	14.66	10.30	12.79	9.99	15.05	8.48	12.75	8.91
AUH	BAG5	939	994	755	859	543	0.440	8.85	10.17	9.37	10.41	9.70	9.99	8.57	10.48	9.66	10.58
AAK1	BASP1	86	998	886	473	295	0.803	9.20	14.45	12.16	14.01	7.27	8.06	7.95	10.34	9.38	6.68
ACLY	BASP1	417	954	448	300	694	0.811	11.68	14.45	11.40	14.01	11.29	8.06	12.19	10.34	10.58	6.68
AGK	BASP1	24	903	307	326	569	0.771	9.76	14.45	10.56	14.01	10.09	8.06	9.99	10.34	9.39	6.68
ANXA6	BASP1	59	1000	655	362	509	0.918	13.34	14.45	13.41	14.01	13.42	8.06	13.49	10.34	13.33	6.68
AP2A2	BASP1	463	963	740	255	808	0.652	11.52	14.45	12.91	14.01	12.19	8.06	12.23	10.34	11.17	6.68
AP2S1	BASP1	454	1000	833	518	625	0.762	11.67	14.45	11.54	14.01	11.29	8.06	10.76	10.34	10.67	6.68
AP3M2	BASP1	22	991	776	599	491	0.794	9.51	14.45	11.41	14.01	8.40	8.06	10.06	10.34	9.31	6.68
AP3S1	BASP1	847	970	846	573	859	0.378	10.83	14.45	11.09	14.01	10.75	8.06	10.37	10.34	9.70	6.68
ARFIP2	BASP1	228	971	715	510	660	0.750	10.53	14.45	10.86	14.01	11.02	8.06	10.59	10.34	9.79	6.68
ATP1A1	BASP1	129	989	884	239	237	0.786	12.75	14.45	14.66	14.01	12.79	8.06	15.05	10.34	12.75	6.68
ATP5A1	BASP1	431	974	739	258	70	0.829	12.98	14.45	14.59	14.01	14.03	8.06	13.65	10.34	15.13	6.68
ATP5B	BASP1	517	989	811	495	69	0.814	13.74	14.45	14.91	14.01	14.35	8.06	14.31	10.34	15.46	6.68
ATP5G3	BASP1	451	999	784	471	51	0.856	11.42	14.45	12.34	14.01	13.03	8.06	11.62	10.34	13.28	6.68
ATP5H	BASP1	548	987	787	503	305	0.805	10.99	14.45	11.77	14.01	11.93	8.06	11.03	10.34	12.93	6.68
ALDH2	BBS2	569	900	496	925	681	0.475	12.31	9.50	14.12	12.03	15.62	9.46	13.79	9.93	13.17	11.15
ADIPOR2	BBX	940	983	526	524	878	0.532	11.66	10.52	11.71	10.18	12.99	9.81	12.53	10.92	11.90	10.32
ARHGEF10	BBX	831	942	562	723	838	0.407	7.28	10.52	10.76	10.18	8.43	9.81	12.15	10.92	9.12	10.32
AACS	BCAP29	823	965	951	850	678	0.279	9.30	9.75	11.54	11.41	8.69	10.31	9.50	10.96	9.15	11.28
ALDOA	BCAP29	402	932	856	873	418	0.499	16.43	9.75	16.81	11.41	13.08	10.31	14.97	10.96	17.22	11.28
ANAPC1	BCAP29	822	997	999	988	831	0.175	9.84	9.75	9.97	11.41	9.78	10.31	9.80	10.96	10.50	11.28
ANKMY2	BCAP29	978	1000	678	911	242	0.467	8.70	9.75	10.40	11.41	9.01	10.31	8.93	10.96	9.78	11.28
AP2S1	BCAP29	703	916	960	774	618	0.327	11.67	9.75	11.54	11.41	11.29	10.31	10.76	10.96	10.67	11.28
ATP6V0C	BCAP29	200	812	980	830	700	0.212	14.12	9.75	14.26	11.41	12.30	10.31	12.91	10.96	12.61	11.28
AP3M2	BCAP31	126	887	676	687	748	0.469	9.51	13.21	11.41	12.65	8.40	12.60	10.06	12.77	9.31	11.42
ACADSB	BCAS2	930	914	61	844	374	0.449	8.48	9.60	10.49	10.38	14.23	9.89	9.76	9.11	11.81	10.37
ALDH5A1	BCAS2	524	847	195	858	581	0.468	9.01	9.60	12.08	10.38	12.51	9.89	8.14	9.11	11.08	10.37
ANKMY2	BCAS2	980	996	668	734	919	0.342	8.70	9.60	10.40	10.38	9.01	9.89	8.93	9.11	9.78	10.37
ANXA6	BCAS2	865	954	903	742	923	0.192	13.34	9.60	13.41	10.38	13.42	9.89	13.49	9.11	13.33	10.37
ARF1	BCAS2	788	988	988	787	711	0.339	14.33	9.60	14.00	10.38	13.87	9.89	14.52	9.11	13.66	10.37
ARF3	BCAS2	573	991	977	768	695	0.475	12.71	9.60	14.56	10.38	11.49	9.89	12.91	9.11	9.96	10.37
ARFGEF2	BCAS2	945	974	915	751	391	0.393	9.76	9.60	10.80	10.38	11.48	9.89	11.11	9.11	11.32	10.37
ATP5B	BCAS2	863	993	983	864	498	0.381	13.74	9.60	14.91	10.38	14.35	9.89	14.31	9.11	15.46	10.37
ATP6AP1	BCAS2	623	969	985	780	909	0.297	13.29	9.60	13.19	10.38	11.67	9.89	13.09	9.11	11.37	10.37
ATP6V0C	BCAS2	324	880	997	770	666	0.352	14.12	9.60	14.26	10.38	12.30	9.89	12.91	9.11	12.61	10.37
ATP6V1H	BCAS2	841	987	986	909	905	0.153	10.60	9.60	12.47	10.38	9.57	9.89	10.43	9.11	10.79	10.37
AUH	BCAS2	856	995	795	713	835	0.391	8.85	9.60	9.37	10.38	9.70	9.89	8.57	9.11	9.66	10.37
ALDOA	BCL2L2	431	937	831	908	60	0.504	16.43	8.91	16.81	13.06	13.08	10.56	14.97	11.72	17.22	10.79
AP2S1	BCL2L2	568	961	898	862	855	0.331	11.67	8.91	11.54	13.06	11.29	10.56	10.76	11.72	10.67	10.79
ATP6V0C	BCL2L2	258	855	912	869	804	0.203	14.12	8.91	14.26	13.06	12.30	10.56	12.91	11.72	12.61	10.79
ADAR	BCL7B	945	956	883	935	724	0.169	14.06	10.91	13.41	11.19	13.21	10.76	13.65	10.88	11.51	11.75
ANXA6	BECN1	301	969	954	791	585	0.523	13.34	11.06	13.41	9.93	13.42	9.52	13.49	10.02	13.33	11.41
AP2S1	BECN1	602	956	922	899	878	0.262	11.67	11.06	11.54	9.93	11.29	9.52	10.76	10.02	10.67	11.41
AP3M2	BECN1	272	995	520	580	592	0.894	9.51	11.06	11.41	9.93	8.40	9.52	10.06	10.02	9.31	11.41
APMAP	BECN1	970	947	992	978	817	0.065	13.88	11.06	11.98	9.93	14.10	9.52	11.96	10.02	10.81	11.41
ATF7	BEST1	747	826	636	583	793	0.273	10.85	12.24	9.68	9.62	10.22	7.77	11.17	10.03	10.96	7.30
ANKRD13A	BIN1	77	955	768	916	458	0.568	12.88	11.42	9.96	13.38	10.66	10.84	11.62	10.41	9.77	15.53
BAZ2B	BIN1	267	664	777	585	448	0.203	10.74	11.42	10.30	13.38	10.08	10.84	10.73	10.41	10.58	15.53
ACSL1	BIRC6	604	926	869	616	699	0.458	16.81	11.14	10.48	11.43	15.79	11.71	14.09	11.86	15.03	11.98
ALDOA	BLCAP	483	987	82	890	167	0.779	16.43	10.88	16.81	12.78	13.08	12.32	14.97	11.10	17.22	14.05
AP2S1	BLCAP	672	996	719	894	815	0.442	11.67	10.88	11.54	12.78	11.29	12.32	10.76	11.10	10.67	14.05
ARL3	BLCAP	858	992	458	979	812	0.409	9.35	10.88	11.61	12.78	8.63	12.32	9.59	11.10	9.10	14.05
ATP6V1C1	BLCAP	738	1000	551	969	854	0.444	11.80	10.88	12.62	12.78	10.85	12.32	11.04	11.10	10.35	14.05
ANKMY2	BLOC1S2	855	993	662	838	36	0.558	8.70	10.40	10.40	10.85	9.01	10.01	8.93	9.82	9.78	10.83
AP3M2	BLOC1S2	207	987	853	714	435	0.691	9.51	10.40	11.41	10.85	8.40	10.01	10.06	9.82	9.31	10.83
APLP2	BLOC1S2	876	926	822	925	916	0.083	14.29	10.40	14.14	10.85	14.20	10.01	15.53	9.82	12.35	10.83
ATG2B	BLOC1S2	928	885	665	645	903	0.230	10.45	10.40	11.16	10.85	11.81	10.01	11.33	9.82	11.53	10.83
ATP6AP1	BLOC1S2	723	927	969	973	661	0.235	13.29	10.40	13.19	10.85	11.67	10.01	13.09	9.82	11.37	10.83
AUH	BLOC1S2	949	987	585	787	248	0.564	8.85	10.40	9.37	10.85	9.70	10.01	8.57	9.82	9.66	10.83
AFG3L2	BLOC1S6	922	991	909	911	852	0.185	9.57	10.30	10.17	10.98	10.61	10.81	9.71	10.72	12.40	10.74
ALAS1	BLOC1S6	411	940	457	895	508	0.678	11.62	10.30	10.59	10.98	13.01	10.81	11.01	10.72	11.83	10.74
ALDOA	BLOC1S6	206	915	966	879	446	0.433	16.43	10.30	16.81	10.98	13.08	10.81	14.97	10.72	17.22	10.74
AP1M1	BLOC1S6	637	942	796	892	849	0.297	12.05	10.30	11.47	10.98	12.13	10.81	10.98	10.72	11.02	10.74
AP2S1	BLOC1S6	299	902	804	779	802	0.361	11.67	10.30	11.54	10.98	11.29	10.81	10.76	10.72	10.67	10.74
APOO	BLOC1S6	589	989	767	803	484	0.648	8.02	10.30	9.77	10.98	8.10	10.81	6.73	10.72	9.50	10.74
ARHGEF7	BLOC1S6	891	955	751	769	921	0.244	11.16	10.30	12.80	10.98	11.77	10.81	12.22	10.72	12.19	10.74
ATP5B	BLOC1S6	692	991	843	958	591	0.440	13.74	10.30	14.91	10.98	14.35	10.81	14.31	10.72	15.46	10.74
ATP5H	BLOC1S6	576	951	823	888	706	0.406	10.99	10.30	11.77	10.98	11.93	10.81	11.03	10.72	12.93	10.74
ATP5J	BLOC1S6	711	980	703	929	682	0.448	9.74	10.30	11.36	10.98	11.91	10.81	10.12	10.72	12.56	10.74
ATP5O	BLOC1S6	693	988	819	952	634	0.427	11.11	10.30	12.41	10.98	12.08	10.81	11.48	10.72	13.30	10.74
ATP6AP1	BLOC1S6	571	935	862	890	852	0.282	13.29	10.30	13.19	10.98	11.67	10.81	13.09	10.72	11.37	10.74
ATP6V0D1	BLOC1S6	345	928	897	800	842	0.337	13.64	10.30	12.71	10.98	11.55	10.81	12.10	10.72	12.12	10.74
ATXN7L3B	BLOC1S6	979	1000	790	948	991	0.146	10.98	10.30	12.49	10.98	11.43	10.81	11.23	10.72	11.45	10.74
BABAM1	BLOC1S6	359	965	825	895	817	0.411	11.65	10.30	11.68	10.98	10.88	10.81	10.58	10.72	11.69	10.74
AFG3L2	BLVRA	870	993	882	982	869	0.184	9.57	10.54	10.17	9.62	10.61	6.99	9.71	10.47	12.40	10.30
AP3M2	BLVRA	446	983	894	630	898	0.505	9.51	10.54	11.41	9.62	8.40	6.99	10.06	10.47	9.31	10.30
ABHD10	BMPR2	983	989	617	384	723	0.567	9.39	9.83	10.13	11.76	10.64	10.78	8.78	13.09	9.44	11.28
ACBD6	BMPR2	787	920	758	407	955	0.357	9.47	9.83	9.15	11.76	8.86	10.78	9.20	13.09	9.75	11.28
ACOT7	BMPR2	237	882	626	312	756	0.573	8.95	9.83	12.56	11.76	9.34	10.78	9.09	13.09	7.77	11.28
ACP1	BMPR2	705	998	905	635	969	0.389	10.60	9.83	11.17	11.76	11.47	10.78	10.94	13.09	11.32	11.28
ADK	BMPR2	727	976	661	366	934	0.541	9.38	9.83	8.69	11.76	11.59	10.78	9.31	13.09	9.63	11.28
ADSL	BMPR2	894	943	701	195	875	0.401	10.59	9.83	9.07	11.76	10.19	10.78	9.86	13.09	12.92	11.28
ALAS1	BMPR2	450	923	448	499	496	0.846	11.62	9.83	10.59	11.76	13.01	10.78	11.01	13.09	11.83	11.28
ALDOA	BMPR2	290	892	493	296	497	0.784	16.43	9.83	16.81	11.76	13.08	10.78	14.97	13.09	17.22	11.28
ANXA6	BMPR2	537	923	728	437	858	0.534	13.34	9.83	13.41	11.76	13.42	10.78	13.49	13.09	13.33	11.28
AP2M1	BMPR2	576	949	853	601	932	0.417	13.46	9.83	14.96	11.76	12.91	10.78	13.65	13.09	12.83	11.28
AP2S1	BMPR2	470	854	675	155	761	0.490	11.67	9.83	11.54	11.76	11.29	10.78	10.76	13.09	10.67	11.28
APEH	BMPR2	841	891	519	160	810	0.447	11.53	9.83	11.27	11.76	11.97	10.78	10.92	13.09	12.44	11.28
APOO	BMPR2	723	994	702	267	525	0.763	8.02	9.83	9.77	11.76	8.10	10.78	6.73	13.09	9.50	11.28
ARHGEF9	BMPR2	771	985	683	490	795	0.596	9.21	9.83	13.15	11.76	8.97	10.78	9.44	13.09	8.78	11.28
ARPC5L	BMPR2	829	961	476	509	770	0.618	10.88	9.83	11.60	11.76	10.90	10.78	10.85	13.09	11.00	11.28
ATP5A1	BMPR2	914	983	675	428	568	0.637	12.98	9.83	14.59	11.76	14.03	10.78	13.65	13.09	15.13	11.28
ATP5B	BMPR2	823	976	596	487	519	0.733	13.74	9.83	14.91	11.76	14.35	10.78	14.31	13.09	15.46	11.28
ATP5C1	BMPR2	880	995	762	550	816	0.486	11.21	9.83	11.93	11.76	12.64	10.78	11.58	13.09	13.26	11.28
ATP5G3	BMPR2	879	964	633	356	315	0.672	11.42	9.83	12.34	11.76	13.03	10.78	11.62	13.09	13.28	11.28
ATP5H	BMPR2	719	930	714	408	715	0.536	10.99	9.83	11.77	11.76	11.93	10.78	11.03	13.09	12.93	11.28
ATP6V0B	BMPR2	614	894	586	361	719	0.579	13.65	9.83	12.20	11.76	12.06	10.78	12.02	13.09	11.51	11.28
ATP6V0C	BMPR2	156	751	619	369	701	0.342	14.12	9.83	14.26	11.76	12.30	10.78	12.91	13.09	12.61	11.28
ATP6V0D1	BMPR2	491	882	683	225	844	0.500	13.64	9.83	12.71	11.76	11.55	10.78	12.10	13.09	12.12	11.28
ATP6V1D	BMPR2	804	999	824	433	927	0.470	10.94	9.83	11.92	11.76	10.07	10.78	10.13	13.09	11.05	11.28
ATP6V1F	BMPR2	621	875	691	282	747	0.470	11.65	9.83	12.12	11.76	10.01	10.78	11.09	13.09	11.04	11.28
ATP6V1G1	BMPR2	962	996	795	643	958	0.313	11.16	9.83	10.88	11.76	11.23	10.78	11.29	13.09	11.40	11.28
ATXN7L3B	BMPR2	992	997	907	658	964	0.234	10.98	9.83	12.49	11.76	11.43	10.78	11.23	13.09	11.45	11.28
BABAM1	BMPR2	450	906	807	464	854	0.481	11.65	9.83	11.68	11.76	10.88	10.78	10.58	13.09	11.69	11.28
BASP1	BMPR2	470	936	808	400	672	0.632	14.45	9.83	14.01	11.76	8.06	10.78	10.34	13.09	6.68	11.28
BLCAP	BMPR2	961	985	352	583	772	0.562	10.88	9.83	12.78	11.76	12.32	10.78	11.10	13.09	14.05	11.28
ACLY	BNIP3	745	988	367	758	839	0.555	11.68	9.50	11.40	11.44	11.29	12.07	12.19	9.81	10.58	12.63
ACTR2	BNIP3	440	997	899	795	931	0.431	13.66	9.50	12.75	11.44	12.04	12.07	12.84	9.81	12.11	12.63
APMAP	BNIP3	304	911	698	850	959	0.343	13.88	9.50	11.98	11.44	14.10	12.07	11.96	9.81	10.81	12.63
ARMCX3	BNIP3	929	999	715	709	309	0.572	10.37	9.50	11.74	11.44	10.85	12.07	11.43	9.81	10.96	12.63
ATP6V1E1	BNIP3	463	970	905	926	951	0.299	12.33	9.50	13.63	11.44	11.12	12.07	12.27	9.81	12.65	12.63
BCAP29	BNIP3	638	990	880	869	641	0.466	9.75	9.50	11.41	11.44	10.31	12.07	10.96	9.81	11.28	12.63
BLOC1S6	BNIP3	717	996	642	746	793	0.543	10.30	9.50	10.98	11.44	10.81	12.07	10.72	9.81	10.74	12.63
ACAT2	BNIP3L	466	957	525	433	649	0.827	9.24	12.91	9.59	11.99	11.06	10.64	9.07	12.19	7.47	11.02
ADO	BNIP3L	409	990	880	680	723	0.589	9.12	12.91	10.15	11.99	8.75	10.64	8.81	12.19	9.94	11.02
AMD1	BNIP3L	452	999	765	701	881	0.575	11.47	12.91	11.63	11.99	10.87	10.64	11.53	12.19	11.09	11.02
ANAPC5	BNIP3L	288	938	787	679	650	0.568	11.89	12.91	12.29	11.99	12.10	10.64	12.02	12.19	12.47	11.02
ANKRD28	BNIP3L	349	947	586	858	868	0.488	10.00	12.91	10.98	11.99	11.05	10.64	10.78	12.19	12.32	11.02
ARV1	BNIP3L	475	987	600	633	501	0.857	8.14	12.91	9.18	11.99	9.12	10.64	8.04	12.19	9.13	11.02
ADAR	BOD1	651	994	899	982	791	0.327	14.06	8.57	13.41	10.05	13.21	9.95	13.65	10.02	11.51	11.69
ALAS1	BOD1	455	985	247	844	584	0.756	11.62	8.57	10.59	10.05	13.01	9.95	11.01	10.02	11.83	11.69
ACTR3B	BRE	800	983	887	873	889	0.241	8.08	10.98	10.67	10.03	8.74	9.69	7.19	9.61	9.22	11.05
ABCF1	BRK1	473	981	999	953	967	0.262	11.11	12.29	10.97	12.18	11.49	11.66	11.57	12.26	12.82	12.04
ALDOA	BRK1	866	995	962	957	414	0.347	16.43	12.29	16.81	12.18	13.08	11.66	14.97	12.26	17.22	12.04
AP2A2	BRK1	913	980	980	989	980	0.034	11.52	12.29	12.91	12.18	12.19	11.66	12.23	12.26	11.17	12.04
AP3M2	BRK1	330	997	835	910	882	0.430	9.51	12.29	11.41	12.18	8.40	11.66	10.06	12.26	9.31	12.04
ATP6V0C	BRK1	636	942	1000	942	990	0.153	14.12	12.29	14.26	12.18	12.30	11.66	12.91	12.26	12.61	12.04
BASP1	BRK1	679	984	883	584	750	0.520	14.45	12.29	14.01	12.18	8.06	11.66	10.34	12.26	6.68	12.04
APEX1	BTBD1	853	966	951	903	590	0.283	11.34	10.44	11.28	11.99	11.78	10.71	11.57	10.91	11.78	13.94
ADK	BTBD10	190	864	627	894	935	0.300	9.38	10.02	8.69	10.90	11.59	8.60	9.31	9.21	9.63	9.69
AFG3L2	BTBD10	474	1000	920	965	947	0.334	9.57	10.02	10.17	10.90	10.61	8.60	9.71	9.21	12.40	9.69
ANAPC1	BTBD10	215	995	991	978	955	0.278	9.84	10.02	9.97	10.90	9.78	8.60	9.80	9.21	10.50	9.69
ANKH	BTBD10	11	997	889	721	409	0.689	10.99	10.02	12.55	10.90	11.70	8.60	10.76	9.21	12.06	9.69
ANXA6	BTBD10	57	1000	837	891	673	0.549	13.34	10.02	13.41	10.90	13.42	8.60	13.49	9.21	13.33	9.69
APLP2	BTBD10	769	946	902	890	978	0.139	14.29	10.02	14.14	10.90	14.20	8.60	15.53	9.21	12.35	9.69
ARF1	BTBD10	634	994	972	856	974	0.270	14.33	10.02	14.00	10.90	13.87	8.60	14.52	9.21	13.66	9.69
ARL3	BTBD10	991	965	977	897	969	0.034	9.35	10.02	11.61	10.90	8.63	8.60	9.59	9.21	9.10	9.69
ATP5A1	BTBD10	737	994	909	981	613	0.368	12.98	10.02	14.59	10.90	14.03	8.60	13.65	9.21	15.13	9.69
ATP5B	BTBD10	684	1000	926	960	569	0.430	13.74	10.02	14.91	10.90	14.35	8.60	14.31	9.21	15.46	9.69
ATP5O	BTBD10	687	974	944	989	704	0.293	11.11	10.02	12.41	10.90	12.08	8.60	11.48	9.21	13.30	9.69
ATP6AP1	BTBD10	558	996	993	859	964	0.305	13.29	10.02	13.19	10.90	11.67	8.60	13.09	9.21	11.37	9.69
ATP6V0D1	BTBD10	886	1000	976	892	930	0.158	13.64	10.02	12.71	10.90	11.55	8.60	12.10	9.21	12.12	9.69
ATP6V1F	BTBD10	467	946	985	867	841	0.315	11.65	10.02	12.12	10.90	10.01	8.60	11.09	9.21	11.04	9.69
ATRN	BTBD10	434	1000	793	969	1000	0.369	9.75	10.02	11.74	10.90	12.25	8.60	10.87	9.21	10.97	9.69
BABAM1	BTBD10	140	997	979	966	939	0.302	11.65	10.02	11.68	10.90	10.88	8.60	10.58	9.21	11.69	9.69
ABCA3	BTBD6	976	934	438	710	399	0.546	8.87	10.70	12.96	11.87	7.45	10.88	13.89	10.73	10.00	11.93
ATP6V1F	BTBD6	848	967	715	942	654	0.354	11.65	10.70	12.12	11.87	10.01	10.88	11.09	10.73	11.04	11.93
APLP2	BTF3L4	791	970	853	939	966	0.166	14.29	9.93	14.14	10.37	14.20	9.80	15.53	9.78	12.35	11.22
ARHGEF7	BTF3L4	656	970	832	270	941	0.475	11.16	9.93	12.80	10.37	11.77	9.80	12.22	9.78	12.19	11.22
ATP6AP1	BTF3L4	623	942	973	972	900	0.180	13.29	9.93	13.19	10.37	11.67	9.80	13.09	9.78	11.37	11.22
ATP6V0C	BTF3L4	127	772	971	883	785	0.136	14.12	9.93	14.26	10.37	12.30	9.80	12.91	9.78	12.61	11.22
ATRN	BTF3L4	806	998	699	993	995	0.249	9.75	9.93	11.74	10.37	12.25	9.80	10.87	9.78	10.97	11.22
ATP5B	BTN2A1	760	982	577	603	455	0.744	13.74	11.74	14.91	9.84	14.35	9.76	14.31	11.15	15.46	9.89
ATP5G3	BTN2A1	739	959	657	603	358	0.668	11.42	11.74	12.34	9.84	13.03	9.76	11.62	11.15	13.28	9.89
ATP5O	BTN2A1	613	902	804	764	631	0.398	11.11	11.74	12.41	9.84	12.08	9.76	11.48	11.15	13.30	9.89
APOO	BTRC	839	995	786	903	848	0.302	8.02	9.28	9.77	11.65	8.10	9.91	6.73	9.24	9.50	10.51
ATP5B	BTRC	903	1000	548	893	671	0.492	13.74	9.28	14.91	11.65	14.35	9.91	14.31	9.24	15.46	10.51
ATP6V1C1	BTRC	645	1000	822	978	962	0.296	11.80	9.28	12.62	11.65	10.85	9.91	11.04	9.24	10.35	10.51
ABHD6	BUB3	672	954	713	821	943	0.334	8.61	11.10	9.93	10.26	11.20	11.07	8.06	11.01	8.20	10.86
AIG1	BUB3	743	937	741	968	19	0.413	9.57	11.10	10.35	10.26	12.31	11.07	9.19	11.01	8.37	10.86
BASP1	BZW2	136	1000	898	593	82	0.754	14.45	9.81	14.01	9.33	8.06	9.12	10.34	9.84	6.68	12.65
ACLY	C10orf32	855	873	388	715	757	0.333	11.68	8.99	11.40	9.75	11.29	11.17	12.19	9.58	10.58	10.22
ACTG1	C10orf32	763	889	364	822	509	0.481	16.54	8.99	16.28	9.75	14.96	11.17	17.22	9.58	13.94	10.22
AP2B1	C10orf32	772	863	686	952	930	0.134	12.77	8.99	14.15	9.75	11.74	11.17	13.34	9.58	12.61	10.22
ATP6AP1	C10orf32	508	707	673	755	924	0.117	13.29	8.99	13.19	9.75	11.67	11.17	13.09	9.58	11.37	10.22
ATP6V0B	C10orf32	525	666	647	719	804	0.080	13.65	8.99	12.20	9.75	12.06	11.17	12.02	9.58	11.51	10.22
AAK1	C11orf31	442	911	761	153	586	0.648	9.20	10.44	12.16	11.01	7.27	11.48	7.95	10.56	9.38	10.69
ABR	C11orf31	699	968	605	921	483	0.574	12.54	10.44	15.13	11.01	9.16	11.48	13.01	10.56	10.48	10.69
ACP2	C11orf31	878	964	891	946	840	0.150	10.17	10.44	10.30	11.01	12.20	11.48	10.28	10.56	9.52	10.69
ACTR1A	C11orf31	779	978	933	973	982	0.124	12.69	10.44	13.19	11.01	11.53	11.48	12.55	10.56	13.28	10.69
ALAS1	C11orf31	462	869	507	835	258	0.567	11.62	10.44	10.59	11.01	13.01	11.48	11.01	10.56	11.83	10.69
ALDOA	C11orf31	520	988	824	961	400	0.574	16.43	10.44	16.81	11.01	13.08	11.48	14.97	10.56	17.22	10.69
AMN1	C11orf31	561	940	866	821	851	0.331	8.84	10.44	8.55	11.01	5.90	11.48	6.21	10.56	8.60	10.69
ANXA6	C11orf31	736	984	849	804	793	0.377	13.34	10.44	13.41	11.01	13.42	11.48	13.49	10.56	13.33	10.69
AP1M1	C11orf31	804	980	967	988	973	0.098	12.05	10.44	11.47	11.01	12.13	11.48	10.98	10.56	11.02	10.69
AP2M1	C11orf31	814	991	976	992	999	0.096	13.46	10.44	14.96	11.01	12.91	11.48	13.65	10.56	12.83	10.69
ARPC2	C11orf31	766	978	910	974	954	0.154	14.63	10.44	12.36	11.01	11.91	11.48	13.74	10.56	13.04	10.69
ARPP19	C11orf31	813	928	913	839	763	0.192	11.60	10.44	13.95	11.01	11.53	11.48	12.49	10.56	13.18	10.69
ATP1A1	C11orf31	620	939	646	658	372	0.666	12.75	10.44	14.66	11.01	12.79	11.48	15.05	10.56	12.75	10.69
ATP2B1	C11orf31	544	894	766	626	727	0.457	11.12	10.44	12.96	11.01	10.17	11.48	10.84	10.56	11.09	10.69
ATP6AP1	C11orf31	559	974	951	965	974	0.224	13.29	10.44	13.19	11.01	11.67	11.48	13.09	10.56	11.37	10.69
ATP6AP2	C11orf31	804	941	874	933	924	0.115	12.10	10.44	12.38	11.01	11.55	11.48	12.27	10.56	10.23	10.69
ATP6V0A1	C11orf31	661	974	870	901	905	0.280	11.61	10.44	13.73	11.01	11.24	11.48	11.48	10.56	12.41	10.69
ATP6V0B	C11orf31	705	983	919	988	986	0.171	13.65	10.44	12.20	11.01	12.06	11.48	12.02	10.56	11.51	10.69
ATP6V0C	C11orf31	321	999	950	993	995	0.279	14.12	10.44	14.26	11.01	12.30	11.48	12.91	10.56	12.61	10.69
ATP6V0D1	C11orf31	593	992	915	965	1000	0.252	13.64	10.44	12.71	11.01	11.55	11.48	12.10	10.56	12.12	10.69
ATP6V1B2	C11orf31	548	969	953	872	948	0.278	13.91	10.44	13.89	11.01	11.51	11.48	12.98	10.56	12.08	10.69
ATP6V1C1	C11orf31	511	944	930	919	931	0.242	11.80	10.44	12.62	11.01	10.85	11.48	11.04	10.56	10.35	10.69
ATP6V1F	C11orf31	976	996	952	995	978	0.042	11.65	10.44	12.12	11.01	10.01	11.48	11.09	10.56	11.04	10.69
ATP6V1H	C11orf31	876	944	933	946	971	0.040	10.60	10.44	12.47	11.01	9.57	11.48	10.43	10.56	10.79	10.69
ATRN	C11orf31	758	911	762	898	887	0.170	9.75	10.44	11.74	11.01	12.25	11.48	10.87	10.56	10.97	10.69
BASP1	C11orf31	289	993	632	556	585	0.850	14.45	10.44	14.01	11.01	8.06	11.48	10.34	10.56	6.68	10.69
BCAP29	C11orf31	924	868	805	899	583	0.174	9.75	10.44	11.41	11.01	10.31	11.48	10.96	10.56	11.28	10.69
BLOC1S6	C11orf31	747	858	758	884	873	0.105	10.30	10.44	10.98	11.01	10.81	11.48	10.72	10.56	10.74	10.69
BMPR2	C11orf31	814	822	784	449	757	0.216	9.83	10.44	11.76	11.01	10.78	11.48	13.09	10.56	11.28	10.69
BTBD10	C11orf31	612	953	928	911	902	0.230	10.02	10.44	10.90	11.01	8.60	11.48	9.21	10.56	9.69	10.69
AKR1A1	C11orf58	843	932	555	874	636	0.410	11.06	11.11	10.32	11.42	13.11	11.41	11.49	11.91	10.34	12.00
ALAS1	C11orf58	499	911	715	820	493	0.554	11.62	11.11	10.59	11.42	13.01	11.41	11.01	11.91	11.83	12.00
ALDOA	C11orf58	328	859	951	899	478	0.359	16.43	11.11	16.81	11.42	13.08	11.41	14.97	11.91	17.22	12.00
APLP2	C11orf58	725	984	984	994	985	0.130	14.29	11.11	14.14	11.42	14.20	11.41	15.53	11.91	12.35	12.00
APMAP	C11orf58	670	914	971	983	865	0.146	13.88	11.11	11.98	11.42	14.10	11.41	11.96	11.91	10.81	12.00
ATP6AP1	C11orf58	617	853	998	931	918	0.118	13.29	11.11	13.19	11.42	11.67	11.41	13.09	11.91	11.37	12.00
APBA2	C11orf68	110	999	333	624	404	0.936	10.46	11.17	13.30	11.62	6.20	9.84	7.87	10.20	4.12	11.37
APLP2	C11orf73	589	931	812	766	897	0.330	14.29	9.65	14.14	9.54	14.20	9.39	15.53	9.20	12.35	10.43
ATP6V0C	C11orf73	320	696	907	733	924	0.098	14.12	9.65	14.26	9.54	12.30	9.39	12.91	9.20	12.61	10.43
AAK1	C12orf10	501	957	904	81	668	0.627	9.20	10.36	12.16	10.40	7.27	9.37	7.95	9.09	9.38	10.05
ABCA3	C12orf10	804	989	915	660	946	0.316	8.87	10.36	12.96	10.40	7.45	9.37	13.89	9.09	10.00	10.05
ABR	C12orf10	618	975	855	933	522	0.486	12.54	10.36	15.13	10.40	9.16	9.37	13.01	9.09	10.48	10.05
AKAP11	C12orf10	528	918	907	865	883	0.244	9.71	10.36	12.22	10.40	10.48	9.37	11.26	9.09	10.48	10.05
ANKH	C12orf10	467	968	831	765	121	0.638	10.99	10.36	12.55	10.40	11.70	9.37	10.76	9.09	12.06	10.05
ANKRD17	C12orf10	485	852	983	875	846	0.179	11.01	10.36	12.06	10.40	11.84	9.37	12.00	9.09	12.31	10.05
ARL8B	C12orf10	520	953	975	929	786	0.312	11.52	10.36	12.09	10.40	11.22	9.37	11.90	9.09	12.57	10.05
ARPC5L	C12orf10	826	1000	946	712	840	0.338	10.88	10.36	11.60	10.40	10.90	9.37	10.85	9.09	11.00	10.05
ATMIN	C12orf10	664	941	955	983	913	0.152	9.96	10.36	11.54	10.40	10.71	9.37	10.19	9.09	11.26	10.05
ATP1A1	C12orf10	795	984	964	717	305	0.480	12.75	10.36	14.66	10.40	12.79	9.37	15.05	9.09	12.75	10.05
ATP1B1	C12orf10	414	970	870	761	646	0.551	7.56	10.36	13.70	10.40	12.15	9.37	11.50	9.09	13.79	10.05
ATP6V0A1	C12orf10	723	994	951	819	985	0.249	11.61	10.36	13.73	10.40	11.24	9.37	11.48	9.09	12.41	10.05
ATP6V1A	C12orf10	295	975	969	935	853	0.322	11.71	10.36	12.61	10.40	11.30	9.37	11.06	9.09	9.74	10.05
ATP6V1B2	C12orf10	356	986	996	840	981	0.319	13.91	10.36	13.89	10.40	11.51	9.37	12.98	9.09	12.08	10.05
ATP6V1C1	C12orf10	192	979	990	968	972	0.248	11.80	10.36	12.62	10.40	10.85	9.37	11.04	9.09	10.35	10.05
BTBD10	C12orf10	220	977	973	964	948	0.262	10.02	10.36	10.90	10.40	8.60	9.37	9.21	9.09	9.69	10.05
ANKMY2	C12orf29	908	909	878	855	47	0.247	8.70	7.93	10.40	9.59	9.01	9.06	8.93	8.00	9.78	8.78
ARL6IP5	C12orf29	702	948	938	939	686	0.264	12.49	7.93	12.08	9.59	10.83	9.06	12.39	8.00	12.76	8.78
ATP6V1B2	C12orf29	184	764	893	909	945	0.132	13.91	7.93	13.89	9.59	11.51	9.06	12.98	8.00	12.08	8.78
ACTR3B	C12orf4	823	959	841	794	915	0.232	8.08	8.74	10.67	9.32	8.74	8.57	7.19	8.46	9.22	9.73
ATP6V0D1	C12orf4	578	955	960	914	918	0.228	13.64	8.74	12.71	9.32	11.55	8.57	12.10	8.46	12.12	9.73
ATP6V0C	C12orf43	322	953	989	821	849	0.344	14.12	8.94	14.26	9.82	12.30	8.90	12.91	8.08	12.61	8.51
ATP6V1B2	C12orf43	448	1000	988	768	949	0.398	13.91	8.94	13.89	9.82	11.51	8.90	12.98	8.08	12.08	8.51
BASP1	C12orf43	242	998	803	182	438	0.845	14.45	8.94	14.01	9.82	8.06	8.90	10.34	8.08	6.68	8.51
ABCF1	C12orf57	960	814	897	807	542	0.140	11.11	9.49	10.97	9.98	11.49	9.90	11.57	9.87	12.82	9.69
ABHD16A	C12orf57	119	880	938	879	458	0.381	12.08	9.49	10.78	9.98	11.23	9.90	10.70	9.87	10.93	9.69
ALAS1	C12orf57	493	775	325	625	684	0.396	11.62	9.49	10.59	9.98	13.01	9.90	11.01	9.87	11.83	9.69
ALDOA	C12orf57	435	892	905	824	725	0.314	16.43	9.49	16.81	9.98	13.08	9.90	14.97	9.87	17.22	9.69
AP1S2	C12orf57	301	606	834	739	633	0.053	10.84	9.49	10.40	9.98	8.09	9.90	9.86	9.87	11.74	9.69
APEH	C12orf57	579	835	643	684	684	0.375	11.53	9.49	11.27	9.98	11.97	9.90	10.92	9.87	12.44	9.69
ATP6AP1	C12orf57	269	854	966	776	949	0.216	13.29	9.49	13.19	9.98	11.67	9.90	13.09	9.87	11.37	9.69
ATP6V0D1	C12orf57	59	831	922	670	817	0.253	13.64	9.49	12.71	9.98	11.55	9.90	12.10	9.87	12.12	9.69
BAG1	C12orf57	285	893	897	947	795	0.245	12.43	9.49	11.10	9.98	10.95	9.90	11.37	9.87	12.53	9.69
BECN1	C12orf57	99	750	805	747	655	0.174	11.06	9.49	9.93	9.98	9.52	9.90	10.02	9.87	11.41	9.69
ABCE1	C12orf76	859	935	43	713	568	0.550	9.41	9.62	9.86	11.41	10.65	8.82	10.36	8.81	11.08	8.41
ACSL1	C12orf76	750	860	189	327	66	0.595	16.81	9.62	10.48	11.41	15.79	8.82	14.09	8.81	15.03	8.41
ADSS	C12orf76	897	988	285	954	739	0.431	10.83	9.62	10.09	11.41	9.86	8.82	10.46	8.81	9.52	8.41
AGTPBP1	C12orf76	824	997	364	670	767	0.614	12.39	9.62	10.71	11.41	8.67	8.82	10.76	8.81	10.43	8.41
AP5M1	C12orf76	991	828	399	966	323	0.328	9.81	9.62	9.09	11.41	9.79	8.82	9.05	8.81	10.10	8.41
BNIP3L	C12orf76	392	959	425	729	891	0.608	12.91	9.62	11.99	11.41	10.64	8.82	12.19	8.81	11.02	8.41
BTF3L4	C12orf76	981	945	534	959	907	0.225	9.93	9.62	10.37	11.41	9.80	8.82	9.78	8.81	11.22	8.41
ATP2C1	C14orf1	760	931	362	985	908	0.312	10.58	9.34	11.86	10.11	10.80	11.73	12.00	10.12	11.05	9.19
ACAT1	C14orf166	990	979	947	961	418	0.265	9.64	10.90	10.70	10.51	14.36	11.10	10.77	11.25	13.55	12.09
AAK1	C14orf2	148	960	838	89	171	0.751	9.20	10.51	12.16	12.11	7.27	11.13	7.95	10.10	9.38	11.87
ABCF2	C14orf2	568	985	852	925	410	0.547	10.66	10.51	11.35	12.11	10.03	11.13	10.65	10.10	12.40	11.87
ACSL3	C14orf2	807	940	752	870	696	0.318	10.77	10.51	12.05	12.11	11.59	11.13	11.44	10.10	11.42	11.87
ADAR	C14orf2	697	943	836	886	595	0.379	14.06	10.51	13.41	12.11	13.21	11.13	13.65	10.10	11.51	11.87
AGGF1	C14orf2	907	967	936	967	710	0.174	9.68	10.51	10.40	12.11	9.83	11.13	9.49	10.10	10.24	11.87
AKAP11	C14orf2	554	946	926	786	338	0.509	9.71	10.51	12.22	12.11	10.48	11.13	11.26	10.10	10.48	11.87
ANKH	C14orf2	44	967	841	737	822	0.484	10.99	10.51	12.55	12.11	11.70	11.13	10.76	10.10	12.06	11.87
AP2A2	C14orf2	637	962	978	979	655	0.316	11.52	10.51	12.91	12.11	12.19	11.13	12.23	10.10	11.17	11.87
AP2M1	C14orf2	651	997	991	996	858	0.246	13.46	10.51	14.96	12.11	12.91	11.13	13.65	10.10	12.83	11.87
APMAP	C14orf2	819	945	682	994	260	0.417	13.88	10.51	11.98	12.11	14.10	11.13	11.96	10.10	10.81	11.87
ARF1	C14orf2	642	997	954	945	801	0.323	14.33	10.51	14.00	12.11	13.87	11.13	14.52	10.10	13.66	11.87
ARFGEF2	C14orf2	352	916	820	825	536	0.491	9.76	10.51	10.80	12.11	11.48	11.13	11.11	10.10	11.32	11.87
ARHGEF3	C14orf2	321	970	646	561	611	0.781	10.98	10.51	10.85	12.11	7.58	11.13	10.63	10.10	9.47	11.87
ARPC2	C14orf2	960	999	965	966	853	0.126	14.63	10.51	12.36	12.11	11.91	11.13	13.74	10.10	13.04	11.87
ATP1A1	C14orf2	254	954	760	745	53	0.655	12.75	10.51	14.66	12.11	12.79	11.13	15.05	10.10	12.75	11.87
ATP2A2	C14orf2	436	962	691	723	654	0.640	11.26	10.51	13.85	12.11	13.40	11.13	13.45	10.10	16.43	11.87
ATP2B1	C14orf2	254	946	720	525	516	0.761	11.12	10.51	12.96	12.11	10.17	11.13	10.84	10.10	11.09	11.87
ATP6AP1	C14orf2	551	982	983	987	959	0.227	13.29	10.51	13.19	12.11	11.67	11.13	13.09	10.10	11.37	11.87
ATP6AP2	C14orf2	832	991	929	963	654	0.293	12.10	10.51	12.38	12.11	11.55	11.13	12.27	10.10	10.23	11.87
ATP6V0C	C14orf2	276	959	986	977	911	0.254	14.12	10.51	14.26	12.11	12.30	11.13	12.91	10.10	12.61	11.87
ATP6V0D1	C14orf2	782	987	956	989	880	0.172	13.64	10.51	12.71	12.11	11.55	11.13	12.10	10.10	12.12	11.87
ATP6V1B2	C14orf2	831	985	991	908	812	0.202	13.91	10.51	13.89	12.11	11.51	11.13	12.98	10.10	12.08	11.87
ATP6V1C1	C14orf2	878	988	965	984	687	0.219	11.80	10.51	12.62	12.11	10.85	11.13	11.04	10.10	10.35	11.87
ATP6V1H	C14orf2	892	994	980	992	930	0.091	10.60	10.51	12.47	12.11	9.57	11.13	10.43	10.10	10.79	11.87
B4GALT5	C14orf2	747	938	560	471	368	0.723	12.86	10.51	10.64	12.11	11.05	11.13	11.83	10.10	12.62	11.87
BCAP29	C14orf2	913	980	906	915	457	0.343	9.75	10.51	11.41	12.11	10.31	11.13	10.96	10.10	11.28	11.87
BLOC1S6	C14orf2	701	980	733	875	678	0.467	10.30	10.51	10.98	12.11	10.81	11.13	10.72	10.10	10.74	11.87
BMPR2	C14orf2	788	951	677	353	642	0.599	9.83	10.51	11.76	12.11	10.78	11.13	13.09	10.10	11.28	11.87
BTBD10	C14orf2	899	986	948	950	794	0.176	10.02	10.51	10.90	12.11	8.60	11.13	9.21	10.10	9.69	11.87
AAK1	C15orf61	684	868	599	106	20	0.595	9.20	7.55	12.16	7.69	7.27	7.55	7.95	6.69	9.38	9.87
ACSL3	C15orf61	213	881	540	822	433	0.581	10.77	7.55	12.05	7.69	11.59	7.55	11.44	6.69	11.42	9.87
AMPD2	C15orf61	570	934	854	368	165	0.656	12.96	7.55	12.36	7.69	11.59	7.55	11.04	6.69	8.62	9.87
ANKRD17	C15orf61	564	808	782	854	85	0.289	11.01	7.55	12.06	7.69	11.84	7.55	12.00	6.69	12.31	9.87
AP2A2	C15orf61	876	917	932	959	361	0.229	11.52	7.55	12.91	7.69	12.19	7.55	12.23	6.69	11.17	9.87
AP2M1	C15orf61	701	903	835	924	554	0.309	13.46	7.55	14.96	7.69	12.91	7.55	13.65	6.69	12.83	9.87
APLP2	C15orf61	371	957	809	910	412	0.554	14.29	7.55	14.14	7.69	14.20	7.55	15.53	6.69	12.35	9.87
ARF3	C15orf61	349	917	666	829	354	0.587	12.71	7.55	14.56	7.69	11.49	7.55	12.91	6.69	9.96	9.87
ARHGEF3	C15orf61	760	901	435	605	270	0.620	10.98	7.55	10.85	7.69	7.58	7.55	10.63	6.69	9.47	9.87
ATP1A1	C15orf61	776	906	328	762	12	0.543	12.75	7.55	14.66	7.69	12.79	7.55	15.05	6.69	12.75	9.87
ATP2A2	C15orf61	721	932	504	618	645	0.620	11.26	7.55	13.85	7.69	13.40	7.55	13.45	6.69	16.43	9.87
ATP2B1	C15orf61	644	883	631	488	371	0.628	11.12	7.55	12.96	7.69	10.17	7.55	10.84	6.69	11.09	9.87
ATP6AP1	C15orf61	469	911	846	900	808	0.295	13.29	7.55	13.19	7.69	11.67	7.55	13.09	6.69	11.37	9.87
ATP6AP2	C15orf61	544	932	702	887	164	0.547	12.10	7.55	12.38	7.69	11.55	7.55	12.27	6.69	10.23	9.87
ATP6V0C	C15orf61	448	943	807	940	925	0.300	14.12	7.55	14.26	7.69	12.30	7.55	12.91	6.69	12.61	9.87
ATP6V0D1	C15orf61	222	878	773	846	688	0.352	13.64	7.55	12.71	7.69	11.55	7.55	12.10	6.69	12.12	9.87
ATP6V1A	C15orf61	213	865	790	817	292	0.426	11.71	7.55	12.61	7.69	11.30	7.55	11.06	6.69	9.74	9.87
ATP6V1B2	C15orf61	147	866	823	762	306	0.440	13.91	7.55	13.89	7.69	11.51	7.55	12.98	6.69	12.08	9.87
ATP6V1C1	C15orf61	92	890	786	894	368	0.442	11.80	7.55	12.62	7.69	10.85	7.55	11.04	6.69	10.35	9.87
BAP1	C15orf61	683	848	815	915	476	0.273	12.00	7.55	13.60	7.69	11.95	7.55	11.95	6.69	12.16	9.87
BMPR2	C15orf61	652	888	626	532	565	0.589	9.83	7.55	11.76	7.69	10.78	7.55	13.09	6.69	11.28	9.87
ACP1	C16orf45	685	996	377	639	810	0.675	10.60	8.03	11.17	13.31	11.47	9.72	10.94	9.12	11.32	11.79
ALAS1	C16orf45	368	946	335	299	144	0.892	11.62	8.03	10.59	13.31	13.01	9.72	11.01	9.12	11.83	11.79
ATP6AP2	C16orf45	603	983	92	657	721	0.726	12.10	8.03	12.38	13.31	11.55	9.72	12.27	9.12	10.23	11.79
ATXN7L3	C16orf45	543	1000	284	545	898	0.757	12.36	8.03	13.25	13.31	11.13	9.72	11.36	9.12	10.83	11.79
AUH	C16orf45	720	980	396	805	288	0.698	8.85	8.03	9.37	13.31	9.70	9.72	8.57	9.12	9.66	11.79
BCAS2	C16orf45	790	951	194	347	207	0.757	9.60	8.03	10.38	13.31	9.89	9.72	9.11	9.12	10.37	11.79
AP2S1	C16orf58	415	981	902	877	895	0.375	11.67	10.36	11.54	11.02	11.29	11.83	10.76	10.83	10.67	9.43
AGTPBP1	C16orf62	413	980	954	558	963	0.472	12.39	10.71	10.71	11.08	8.67	9.88	10.76	10.48	10.43	10.74
AKIRIN1	C16orf80	781	971	344	832	285	0.635	11.35	9.28	11.27	10.04	11.23	9.73	10.82	8.98	10.81	8.51
ALDOA	C16orf80	532	999	437	770	390	0.847	16.43	9.28	16.81	10.04	13.08	9.73	14.97	8.98	17.22	8.51
AREL1	C16orf80	700	997	727	914	447	0.574	11.86	9.28	10.89	10.04	10.35	9.73	10.68	8.98	10.60	8.51
ARPC2	C16orf80	674	998	701	783	798	0.518	14.63	9.28	12.36	10.04	11.91	9.73	13.74	8.98	13.04	8.51
ATP6V0B	C16orf80	646	999	628	765	621	0.668	13.65	9.28	12.20	10.04	12.06	9.73	12.02	8.98	11.51	8.51
ATP6V0C	C16orf80	393	962	785	767	690	0.553	14.12	9.28	14.26	10.04	12.30	9.73	12.91	8.98	12.61	8.51
APLP2	C16orf91	743	942	846	854	899	0.213	14.29	8.17	14.14	8.01	14.20	8.25	15.53	6.84	12.35	8.78
ACSS2	C17orf85	858	975	154	833	748	0.480	11.19	10.34	10.40	9.35	12.50	9.91	12.02	10.12	12.83	10.00
ANXA4	C17orf85	921	830	893	971	963	0.000	10.66	10.34	8.89	9.35	12.12	9.91	11.82	10.12	9.84	10.00
BIN1	C17orf85	315	966	650	748	691	0.637	11.42	10.34	13.38	9.35	10.84	9.91	10.41	10.12	15.53	10.00
ARCN1	C18orf21	949	995	978	947	959	0.073	12.15	9.14	11.54	7.76	12.35	8.19	12.52	7.39	11.67	9.42
AAK1	C19orf12	818	1000	345	274	710	0.736	9.20	9.31	12.16	10.40	7.27	11.19	7.95	8.92	9.38	11.32
ACOT8	C19orf12	573	995	835	984	479	0.544	10.20	9.31	9.85	10.40	9.48	11.19	8.35	8.92	9.68	11.32
ACTR3B	C19orf12	890	1000	642	909	798	0.381	8.08	9.31	10.67	10.40	8.74	11.19	7.19	8.92	9.22	11.32
ACVR1B	C19orf12	337	997	416	563	523	0.951	11.17	9.31	11.45	10.40	11.66	11.19	10.74	8.92	10.45	11.32
AKT3	C19orf12	981	1000	208	580	473	0.720	9.09	9.31	11.69	10.40	8.17	11.19	10.97	8.92	9.55	11.32
AP2A2	C19orf12	915	996	804	987	587	0.345	11.52	9.31	12.91	10.40	12.19	11.19	12.23	8.92	11.17	11.32
AP2S1	C19orf12	437	992	789	869	702	0.554	11.67	9.31	11.54	10.40	11.29	11.19	10.76	8.92	10.67	11.32
ATF2	C19orf12	903	968	799	954	790	0.213	10.21	9.31	10.69	10.40	10.69	11.19	10.45	8.92	10.28	11.32
ATP6V1B2	C19orf12	345	1000	628	870	729	0.636	13.91	9.31	13.89	10.40	11.51	11.19	12.98	8.92	12.08	11.32
BMPR2	C19orf12	923	986	643	616	730	0.516	9.83	9.31	11.76	10.40	10.78	11.19	13.09	8.92	11.28	11.32
ARF3	C19orf70	640	929	878	912	838	0.224	12.71	9.70	14.56	10.56	11.49	10.35	12.91	9.50	9.96	11.25
ATP6V0A1	C19orf70	629	889	875	790	652	0.305	11.61	9.70	13.73	10.56	11.24	10.35	11.48	9.50	12.41	11.25
ATP6V1B2	C19orf70	381	842	943	817	878	0.183	13.91	9.70	13.89	10.56	11.51	10.35	12.98	9.50	12.08	11.25
BTBD10	C19orf70	347	803	860	926	845	0.151	10.02	9.70	10.90	10.56	8.60	10.35	9.21	9.50	9.69	11.25
ABCF1	C1D	69	885	773	908	798	0.292	11.11	9.22	10.97	8.54	11.49	9.39	11.57	8.42	12.82	9.64
ACTR3B	C1D	811	922	915	925	844	0.098	8.08	9.22	10.67	8.54	8.74	9.39	7.19	8.42	9.22	9.64
AP2B1	C1D	771	960	926	976	952	0.116	12.77	9.22	14.15	8.54	11.74	9.39	13.34	8.42	12.61	9.64
AP3M2	C1D	145	983	697	800	954	0.490	9.51	9.22	11.41	8.54	8.40	9.39	10.06	8.42	9.31	9.64
APLP2	C1D	783	929	871	965	840	0.146	14.29	9.22	14.14	8.54	14.20	9.39	15.53	8.42	12.35	9.64
ARHGEF7	C1D	480	904	819	481	831	0.483	11.16	9.22	12.80	8.54	11.77	9.39	12.22	8.42	12.19	9.64
ATP6AP1	C1D	579	898	828	944	988	0.195	13.29	9.22	13.19	8.54	11.67	9.39	13.09	8.42	11.37	9.64
ATP6V0B	C1D	872	878	808	924	787	0.084	13.65	9.22	12.20	8.54	12.06	9.39	12.02	8.42	11.51	9.64
ATP6V1B2	C1D	927	951	944	904	969	0.039	13.91	9.22	13.89	8.54	11.51	9.39	12.98	8.42	12.08	9.64
BTRC	C1D	871	959	893	980	943	0.085	9.28	9.22	11.65	8.54	9.91	9.39	9.24	8.42	10.51	9.64
C16orf45	C1D	543	913	481	635	610	0.682	8.03	9.22	13.31	8.54	9.72	9.39	9.12	8.42	11.79	9.64
ALAS1	C1QBP	489	971	763	831	859	0.466	11.62	10.41	10.59	10.78	13.01	11.31	11.01	10.25	11.83	11.65
ANKMY2	C1QBP	937	973	415	437	492	0.728	8.70	10.41	10.40	10.78	9.01	11.31	8.93	10.25	9.78	11.65
ARFIP2	C1QBP	971	981	846	961	878	0.134	10.53	10.41	10.86	10.78	11.02	11.31	10.59	10.25	9.79	11.65
ARL3	C1QBP	577	994	974	796	842	0.394	9.35	10.41	11.61	10.78	8.63	11.31	9.59	10.25	9.10	11.65
ATP6V0C	C1QBP	230	908	1000	945	976	0.204	14.12	10.41	14.26	10.78	12.30	11.31	12.91	10.25	12.61	11.65
ABCC3	C1orf127	466	197	233	637	27	0.000	10.18	4.90	5.37	1.60	14.13	2.50	11.09	3.01	5.97	8.35
ADD3	C1orf198	341	811	678	779	56	0.394	12.07	8.35	13.29	11.86	10.02	10.07	12.02	12.70	9.87	12.61
ADIPOR2	C1orf198	634	947	160	393	631	0.761	11.66	8.35	11.71	11.86	12.99	10.07	12.53	12.70	11.90	12.61
ATRAID	C1orf198	569	737	701	569	417	0.304	11.19	8.35	9.65	11.86	10.62	10.07	11.19	12.70	11.47	12.61
ARHGEF12	C1orf21	451	918	395	710	714	0.624	10.51	9.70	12.92	12.35	13.16	10.82	13.32	11.47	12.74	13.62
BID	C1orf21	17	899	342	508	908	0.595	12.04	9.70	10.93	12.35	10.48	10.82	9.27	11.47	10.15	13.62
ABHD16A	C1orf216	762	965	952	892	774	0.240	12.08	9.02	10.78	12.43	11.23	8.54	10.70	9.54	10.93	10.25
ACTR1B	C1orf216	937	996	960	896	947	0.122	10.95	9.02	12.75	12.43	11.65	8.54	11.43	9.54	11.85	10.25
ALAS1	C1orf216	487	916	486	820	515	0.664	11.62	9.02	10.59	12.43	13.01	8.54	11.01	9.54	11.83	10.25
ANAPC1	C1orf216	859	978	938	903	902	0.155	9.84	9.02	9.97	12.43	9.78	8.54	9.80	9.54	10.50	10.25
ARF1	C1orf216	722	982	973	937	969	0.164	14.33	9.02	14.00	12.43	13.87	8.54	14.52	9.54	13.66	10.25
ASB8	C1orf216	820	948	815	709	702	0.373	11.08	9.02	10.24	12.43	10.20	8.54	9.21	9.54	13.17	10.25
ATP6AP2	C1orf216	875	978	932	884	961	0.130	12.10	9.02	12.38	12.43	11.55	8.54	12.27	9.54	10.23	10.25
BECN1	C1orf216	867	980	908	790	886	0.234	11.06	9.02	9.93	12.43	9.52	8.54	10.02	9.54	11.41	10.25
AKAP11	C1orf43	742	982	940	921	837	0.244	9.71	12.12	12.22	12.69	10.48	12.85	11.26	12.53	10.48	13.64
ANKMY2	C1orf43	885	980	650	796	684	0.453	8.70	12.12	10.40	12.69	9.01	12.85	8.93	12.53	9.78	13.64
ANKRD17	C1orf52	989	996	762	964	961	0.154	11.01	9.51	12.06	10.08	11.84	9.18	12.00	9.27	12.31	9.49
AP2A2	C1orf52	814	967	897	872	973	0.159	11.52	9.51	12.91	10.08	12.19	9.18	12.23	9.27	11.17	9.49
APOO	C1orf52	724	983	549	713	601	0.672	8.02	9.51	9.77	10.08	8.10	9.18	6.73	9.27	9.50	9.49
ATP5A1	C1orf52	908	967	202	783	495	0.589	12.98	9.51	14.59	10.08	14.03	9.18	13.65	9.27	15.13	9.49
ATP5B	C1orf52	833	989	226	848	477	0.637	13.74	9.51	14.91	10.08	14.35	9.18	14.31	9.27	15.46	9.49
ATP5G3	C1orf52	889	981	395	794	366	0.621	11.42	9.51	12.34	10.08	13.03	9.18	11.62	9.27	13.28	9.49
ATP5H	C1orf52	792	944	624	828	859	0.337	10.99	9.51	11.77	10.08	11.93	9.18	11.03	9.27	12.93	9.49
ATP6V0B	C1orf52	822	988	778	831	972	0.275	13.65	9.51	12.20	10.08	12.06	9.18	12.02	9.27	11.51	9.49
ATP6V1A	C1orf52	984	996	565	734	968	0.366	11.71	9.51	12.61	10.08	11.30	9.18	11.06	9.27	9.74	9.49
ATXN10	C1orf52	843	990	418	927	945	0.372	10.75	9.51	12.39	10.08	11.53	9.18	11.48	9.27	11.84	9.49
ALDH9A1	C1orf54	545	923	722	496	815	0.555	10.92	6.17	11.35	6.78	12.40	6.32	11.03	7.28	11.92	7.21
ADIPOR2	C21orf91	855	960	591	377	899	0.497	11.66	9.55	11.71	7.59	12.99	8.42	12.53	8.66	11.90	8.42
AMPD3	C21orf91	931	877	373	297	708	0.462	11.34	9.55	9.32	7.59	7.03	8.42	9.17	8.66	12.10	8.42
ATP11A	C21orf91	959	852	746	399	644	0.333	11.64	9.55	10.03	7.59	10.95	8.42	12.72	8.66	10.74	8.42
ATP6V0C	C22orf39	389	821	958	744	854	0.199	14.12	10.34	14.26	11.01	12.30	9.63	12.91	9.78	12.61	12.49
AGAP2	C2CD2L	711	969	625	744	193	0.648	11.44	10.87	13.81	11.70	5.98	9.89	6.98	9.83	9.11	10.13
AMN1	C2orf47	966	984	902	821	950	0.148	8.84	8.58	8.55	7.69	5.90	10.11	6.21	7.32	8.60	9.27
AKAP9	C2orf69	953	712	683	817	362	0.120	10.40	8.78	11.00	9.36	12.22	8.79	11.83	8.35	12.01	9.75
ALAS1	C2orf69	368	867	698	854	753	0.332	11.62	8.78	10.59	9.36	13.01	8.79	11.01	8.35	11.83	9.75
B4GALT5	C2orf69	793	946	678	885	859	0.284	12.86	8.78	10.64	9.36	11.05	8.79	11.83	8.35	12.62	9.75
ACTR10	C3orf17	779	957	977	971	947	0.094	10.67	10.37	11.18	10.11	10.08	10.14	10.38	10.19	10.76	11.21
ACOT7	C5orf22	250	908	754	914	704	0.383	8.95	9.39	12.56	8.78	9.34	9.23	9.09	8.73	7.77	10.48
APMAP	C5orf22	802	944	938	983	854	0.119	13.88	9.39	11.98	8.78	14.10	9.23	11.96	8.73	10.81	10.48
ATP6V0C	C5orf22	213	786	979	860	790	0.143	14.12	9.39	14.26	8.78	12.30	9.23	12.91	8.73	12.61	10.48
ATPIF1	C5orf22	805	905	321	812	94	0.501	10.91	9.39	11.98	8.78	12.11	9.23	10.56	8.73	11.77	10.48
BABAM1	C5orf22	537	912	976	983	796	0.245	11.65	9.39	11.68	8.78	10.88	9.23	10.58	8.73	11.69	10.48
BASP1	C5orf22	552	944	808	283	198	0.708	14.45	9.39	14.01	8.78	8.06	9.23	10.34	8.73	6.68	10.48
ANXA5	C5orf51	939	641	903	786	911	0.000	12.97	9.99	11.49	9.75	12.29	9.84	14.44	9.62	11.68	9.20
ABHD16A	C6orf120	896	915	964	966	736	0.099	12.08	9.64	10.78	9.80	11.23	10.55	10.70	9.74	10.93	10.11
ALDOA	C6orf120	222	903	729	897	310	0.493	16.43	9.64	16.81	9.80	13.08	10.55	14.97	9.74	17.22	10.11
ARHGEF7	C6orf120	733	908	764	582	886	0.334	11.16	9.64	12.80	9.80	11.77	10.55	12.22	9.74	12.19	10.11
ATP5H	C6orf120	759	947	962	980	661	0.237	10.99	9.64	11.77	9.80	11.93	10.55	11.03	9.74	12.93	10.11
ATP6AP1	C6orf120	585	895	983	939	936	0.155	13.29	9.64	13.19	9.80	11.67	10.55	13.09	9.74	11.37	10.11
ATP6V0B	C6orf120	767	895	924	918	947	0.064	13.65	9.64	12.20	9.80	12.06	10.55	12.02	9.74	11.51	10.11
ATP6V1F	C6orf120	600	878	922	882	838	0.159	11.65	9.64	12.12	9.80	10.01	10.55	11.09	9.74	11.04	10.11
AAK1	C6orf136	880	971	643	93	225	0.680	9.20	9.40	12.16	10.68	7.27	9.74	7.95	8.54	9.38	10.53
ACOT7	C6orf136	865	993	829	924	360	0.427	8.95	9.40	12.56	10.68	9.34	9.74	9.09	8.54	7.77	10.53
AMN1	C6orf136	180	938	714	789	615	0.567	8.84	9.40	8.55	10.68	5.90	9.74	6.21	8.54	8.60	10.53
ANKH	C6orf136	486	980	633	741	554	0.746	10.99	9.40	12.55	10.68	11.70	9.74	10.76	8.54	12.06	10.53
ANKRD46	C6orf136	715	929	587	942	801	0.342	7.77	9.40	10.73	10.68	10.25	9.74	8.45	8.54	10.73	10.53
ANXA6	C6orf136	971	992	530	825	628	0.507	13.34	9.40	13.41	10.68	13.42	9.74	13.49	8.54	13.33	10.53
AP2M1	C6orf136	781	998	821	981	739	0.335	13.46	9.40	14.96	10.68	12.91	9.74	13.65	8.54	12.83	10.53
ARL8B	C6orf136	517	952	781	920	358	0.545	11.52	9.40	12.09	10.68	11.22	9.74	11.90	8.54	12.57	10.53
ATP6V0D1	C6orf136	322	999	759	949	613	0.588	13.64	9.40	12.71	10.68	11.55	9.74	12.10	8.54	12.12	10.53
ATP6V1A	C6orf136	281	975	590	915	734	0.581	11.71	9.40	12.61	10.68	11.30	9.74	11.06	8.54	9.74	10.53
ATP6V1B2	C6orf136	202	988	889	808	691	0.532	13.91	9.40	13.89	10.68	11.51	9.74	12.98	8.54	12.08	10.53
ATP6V1E1	C6orf136	512	996	784	992	749	0.473	12.33	9.40	13.63	10.68	11.12	9.74	12.27	8.54	12.65	10.53
BCAP29	C6orf136	686	981	541	930	533	0.617	9.75	9.40	11.41	10.68	10.31	9.74	10.96	8.54	11.28	10.53
BCAS2	C6orf136	920	948	719	848	527	0.389	9.60	9.40	10.38	10.68	9.89	9.74	9.11	8.54	10.37	10.53
C12orf57	C6orf136	943	844	726	908	799	0.082	9.49	9.40	9.98	10.68	9.90	9.74	9.87	8.54	9.69	10.53
C2CD5	C6orf136	469	969	851	971	404	0.528	10.11	9.40	11.21	10.68	9.94	9.74	10.43	8.54	10.04	10.53
ABL2	C6orf203	773	942	705	75	509	0.640	9.79	7.69	10.05	8.35	9.41	9.24	10.59	6.94	9.82	9.56
ALDOA	C6orf211	199	811	266	830	666	0.384	16.43	9.54	16.81	8.53	13.08	10.22	14.97	9.20	17.22	9.65
ATP1A1	C6orf211	188	886	424	793	28	0.625	12.75	9.54	14.66	8.53	12.79	10.22	15.05	9.20	12.75	9.65
C6orf136	C6orf211	244	873	692	967	874	0.277	9.40	9.54	10.68	8.53	9.74	10.22	8.54	9.20	10.53	9.65
BASP1	C9orf16	334	923	658	449	732	0.651	14.45	11.44	14.01	12.11	8.06	9.66	10.34	9.69	6.68	9.43
BTBD6	C9orf16	912	989	904	957	618	0.282	10.70	11.44	11.87	12.11	10.88	9.66	10.73	9.69	11.93	9.43
C2CD2L	C9orf16	833	895	893	913	923	0.032	10.87	11.44	11.70	12.11	9.89	9.66	9.83	9.69	10.13	9.43
C21orf91	C9orf3	705	745	499	667	134	0.304	9.55	7.99	7.59	9.53	8.42	12.09	8.66	10.50	8.42	11.25
ACTR10	C9orf72	680	862	616	194	412	0.576	10.67	11.94	11.18	9.98	10.08	9.54	10.38	11.09	10.76	10.28
ATP5A1	C9orf72	493	850	380	265	45	0.700	12.98	11.94	14.59	9.98	14.03	9.54	13.65	11.09	15.13	10.28
ATP5G3	C9orf72	499	805	503	298	21	0.609	11.42	11.94	12.34	9.98	13.03	9.54	11.62	11.09	13.28	10.28
ATRN	C9orf72	690	839	274	301	751	0.458	9.75	11.94	11.74	9.98	12.25	9.54	10.87	11.09	10.97	10.28
AUH	C9orf72	918	938	552	706	412	0.538	8.85	11.94	9.37	9.98	9.70	9.54	8.57	11.09	9.66	10.28
ANKIB1	CA2	242	795	635	671	521	0.426	9.71	10.29	10.84	10.88	9.91	12.01	10.49	9.30	10.24	10.45
ABHD16A	CAB39	947	948	980	939	411	0.229	12.08	12.72	10.78	12.00	11.23	11.15	10.70	11.94	10.93	13.20
ACADSB	CAB39	719	930	122	809	891	0.401	8.48	12.72	10.49	12.00	14.23	11.15	9.76	11.94	11.81	13.20
ACAT2	CAB39	543	942	728	746	576	0.588	9.24	12.72	9.59	12.00	11.06	11.15	9.07	11.94	7.47	13.20
ACOT13	CAB39	987	884	744	907	794	0.115	9.36	12.72	9.23	12.00	10.76	11.15	8.25	11.94	10.11	13.20
ALDOA	CAB39	363	955	892	912	844	0.336	16.43	12.72	16.81	12.00	13.08	11.15	14.97	11.94	17.22	13.20
AP2S1	CAB39	409	951	947	793	708	0.428	11.67	12.72	11.54	12.00	11.29	11.15	10.76	11.94	10.67	13.20
AP3M2	CAB39	64	1000	718	871	829	0.541	9.51	12.72	11.41	12.00	8.40	11.15	10.06	11.94	9.31	13.20
APOO	CAB39	587	993	946	828	825	0.393	8.02	12.72	9.77	12.00	8.10	11.15	6.73	11.94	9.50	13.20
ARHGEF9	CAB39	245	1000	495	811	581	0.804	9.21	12.72	13.15	12.00	8.97	11.15	9.44	11.94	8.78	13.20
ATP5C1	CAB39	811	998	954	983	876	0.184	11.21	12.72	11.93	12.00	12.64	11.15	11.58	11.94	13.26	13.20
ATP5G3	CAB39	667	995	928	932	664	0.395	11.42	12.72	12.34	12.00	13.03	11.15	11.62	11.94	13.28	13.20
ATP5H	CAB39	614	952	949	934	808	0.252	10.99	12.72	11.77	12.00	11.93	11.15	11.03	11.94	12.93	13.20
ATP5J	CAB39	761	976	930	964	882	0.183	9.74	12.72	11.36	12.00	11.91	11.15	10.12	11.94	12.56	13.20
ATP5L	CAB39	666	976	972	976	732	0.279	11.23	12.72	11.58	12.00	11.61	11.15	11.14	11.94	12.13	13.20
ATP5O	CAB39	600	988	934	960	778	0.340	11.11	12.72	12.41	12.00	12.08	11.15	11.48	11.94	13.30	13.20
ATP6V1F	CAB39	457	901	967	874	638	0.345	11.65	12.72	12.12	12.00	10.01	11.15	11.09	11.94	11.04	13.20
ATPAF1	CAB39	901	955	954	916	955	0.047	9.86	12.72	12.33	12.00	11.43	11.15	9.78	11.94	12.53	13.20
AUH	CAB39	907	1000	812	910	769	0.301	8.85	12.72	9.37	12.00	9.70	11.15	8.57	11.94	9.66	13.20
BABAM1	CAB39	95	987	973	932	867	0.338	11.65	12.72	11.68	12.00	10.88	11.15	10.58	11.94	11.69	13.20
BTRC	CAB39	726	1000	884	930	961	0.249	9.28	12.72	11.65	12.00	9.91	11.15	9.24	11.94	10.51	13.20
C11orf31	CAB39	518	891	884	900	630	0.321	10.44	12.72	11.01	12.00	11.48	11.15	10.56	11.94	10.69	13.20
C14orf2	CAB39	877	984	895	914	742	0.254	10.51	12.72	12.11	12.00	11.13	11.15	10.10	11.94	11.87	13.20
C2orf47	CAB39	984	996	984	893	948	0.087	8.58	12.72	7.69	12.00	10.11	11.15	7.32	11.94	9.27	13.20
AP3M2	CACUL1	483	985	929	817	715	0.489	9.51	11.67	11.41	10.44	8.40	10.74	10.06	11.27	9.31	11.44
ATP2A2	CACYBP	610	988	774	556	191	0.756	11.26	10.81	13.85	12.08	13.40	10.27	13.45	10.15	16.43	10.95
ABHD4	CALCOCO2	904	987	902	860	907	0.188	11.59	12.24	9.57	10.94	10.74	12.12	10.68	12.92	10.62	12.94
BBX	CALCOCO2	970	977	982	893	863	0.102	10.52	12.24	10.18	10.94	9.81	12.12	10.92	12.92	10.32	12.94
AP2S1	CALM1	735	957	977	813	582	0.370	11.67	13.48	11.54	17.96	11.29	13.06	10.76	14.18	10.67	14.88
ATP1B1	CALM1	451	992	886	755	716	0.555	7.56	13.48	13.70	17.96	12.15	13.06	11.50	14.18	13.79	14.88
ATP5B	CALM1	992	992	972	955	310	0.275	13.74	13.48	14.91	17.96	14.35	13.06	14.31	14.18	15.46	14.88
ATP5C1	CALM1	914	990	992	987	510	0.280	11.21	13.48	11.93	17.96	12.64	13.06	11.58	14.18	13.26	14.88
ATP5J	CALM1	899	969	994	983	548	0.245	9.74	13.48	11.36	17.96	11.91	13.06	10.12	14.18	12.56	14.88
ATP5O	CALM1	929	983	981	988	248	0.270	11.11	13.48	12.41	17.96	12.08	13.06	11.48	14.18	13.30	14.88
AUH	CALM1	881	970	976	837	228	0.346	8.85	13.48	9.37	17.96	9.70	13.06	8.57	14.18	9.66	14.88
BASP1	CALM1	702	994	823	412	92	0.726	14.45	13.48	14.01	17.96	8.06	13.06	10.34	14.18	6.68	14.88
C14orf2	CALM1	822	986	969	923	386	0.365	10.51	13.48	12.11	17.96	11.13	13.06	10.10	14.18	11.87	14.88
C16orf45	CALM1	760	997	269	672	437	0.778	8.03	13.48	13.31	17.96	9.72	13.06	9.12	14.18	11.79	14.88
ALDOA	CALM2	361	966	961	932	535	0.468	16.43	13.46	16.81	15.82	13.08	13.44	14.97	14.32	17.22	12.64
AP2S1	CALM2	639	970	954	862	872	0.277	11.67	13.46	11.54	15.82	11.29	13.44	10.76	14.32	10.67	12.64
ATP5O	CALM2	752	998	954	997	830	0.230	11.11	13.46	12.41	15.82	12.08	13.44	11.48	14.32	13.30	12.64
ATPIF1	CALM2	503	982	241	883	530	0.756	10.91	13.46	11.98	15.82	12.11	13.44	10.56	14.32	11.77	12.64
BABAM1	CALM2	230	994	978	953	826	0.359	11.65	13.46	11.68	15.82	10.88	13.44	10.58	14.32	11.69	12.64
C15orf61	CALM2	178	927	638	887	501	0.591	7.55	13.46	7.69	15.82	7.55	13.44	6.69	14.32	9.87	12.64
AACS	CALM3	816	999	540	688	662	0.645	9.30	13.18	11.54	16.54	8.69	12.50	9.50	12.75	9.15	12.99
AAK1	CALM3	405	996	647	432	80	0.918	9.20	13.18	12.16	16.54	7.27	12.50	7.95	12.75	9.38	12.99
ACTR10	CALM3	809	962	920	923	956	0.120	10.67	13.18	11.18	16.54	10.08	12.50	10.38	12.75	10.76	12.99
AKT3	CALM3	596	991	499	551	185	0.908	9.09	13.18	11.69	16.54	8.17	12.50	10.97	12.75	9.55	12.99
ANAPC1	CALM3	717	908	875	904	813	0.162	9.84	13.18	9.97	16.54	9.78	12.50	9.80	12.75	10.50	12.99
ANAPC7	CALM3	985	901	819	900	628	0.178	10.64	13.18	10.89	16.54	10.54	12.50	10.46	12.75	11.06	12.99
ANKMY2	CALM3	777	937	924	895	911	0.120	8.70	13.18	10.40	16.54	9.01	12.50	8.93	12.75	9.78	12.99
ANKRD50	CALM3	633	870	846	836	601	0.282	8.87	13.18	8.50	16.54	9.23	12.50	10.30	12.75	8.45	12.99
APMAP	CALM3	865	923	607	953	74	0.399	13.88	13.18	11.98	16.54	14.10	12.50	11.96	12.75	10.81	12.99
ARHGEF3	CALM3	592	985	642	776	589	0.670	10.98	13.18	10.85	16.54	7.58	12.50	10.63	12.75	9.47	12.99
ARPP19	CALM3	844	975	854	769	740	0.346	11.60	13.18	13.95	16.54	11.53	12.50	12.49	12.75	13.18	12.99
ATF2	CALM3	511	819	852	886	635	0.246	10.21	13.18	10.69	16.54	10.69	12.50	10.45	12.75	10.28	12.99
ATP2B1	CALM3	448	981	618	701	551	0.777	11.12	13.18	12.96	16.54	10.17	12.50	10.84	12.75	11.09	12.99
ATP6AP2	CALM3	803	968	869	928	468	0.386	12.10	13.18	12.38	16.54	11.55	12.50	12.27	12.75	10.23	12.99
ATP6V1C1	CALM3	605	996	780	878	502	0.610	11.80	13.18	12.62	16.54	10.85	12.50	11.04	12.75	10.35	12.99
ATPAF1	CALM3	940	730	984	911	969	0.000	9.86	13.18	12.33	16.54	11.43	12.50	9.78	12.75	12.53	12.99
BCAS2	CALM3	806	930	802	784	842	0.243	9.60	13.18	10.38	16.54	9.89	12.50	9.11	12.75	10.37	12.99
C15orf61	CALM3	711	867	919	811	947	0.106	7.55	13.18	7.69	16.54	7.55	12.50	6.69	12.75	9.87	12.99
C19orf12	CALM3	795	996	859	971	558	0.401	9.31	13.18	10.40	16.54	11.19	12.50	8.92	12.75	11.32	12.99
C1D	CALM3	717	876	900	898	963	0.080	9.22	13.18	8.54	16.54	9.39	12.50	8.42	12.75	9.64	12.99
C1orf52	CALM3	811	920	671	825	626	0.373	9.51	13.18	10.08	16.54	9.18	12.50	9.27	12.75	9.49	12.99
C2CD2L	CALM3	917	999	638	905	105	0.518	10.87	13.18	11.70	16.54	9.89	12.50	9.83	12.75	10.13	12.99
CAB39	CALM3	614	967	827	862	827	0.369	12.72	13.18	12.00	16.54	11.15	12.50	11.94	12.75	13.20	12.99
ACO2	CAMK2B	241	614	4	157	335	0.228	10.98	5.38	13.28	14.04	11.13	9.15	10.79	3.76	14.13	12.91
ARPC5L	CAMK2B	227	983	146	122	382	0.966	10.88	5.38	11.60	14.04	10.90	9.15	10.85	3.76	11.00	12.91
ATP2B1	CAMK2B	153	987	80	181	325	0.974	11.12	5.38	12.96	14.04	10.17	9.15	10.84	3.76	11.09	12.91
ATP6V1A	CAMK2B	57	979	63	67	440	0.958	11.71	5.38	12.61	14.04	11.30	9.15	11.06	3.76	9.74	12.91
ATP6V1B2	CAMK2B	50	989	27	121	506	0.975	13.91	5.38	13.89	14.04	11.51	9.15	12.98	3.76	12.08	12.91
C14orf2	CAMK2B	83	942	198	111	761	0.753	10.51	5.38	12.11	14.04	11.13	9.15	10.10	3.76	11.87	12.91
ATP5A1	CAMK2G	855	988	679	878	926	0.307	12.98	12.20	14.59	13.75	14.03	10.30	13.65	11.04	15.13	12.36
ATP6V1F	CAMK2G	616	952	585	720	600	0.643	11.65	12.20	12.12	13.75	10.01	10.30	11.09	11.04	11.04	12.36
ACTR1B	CAMKK2	347	982	955	954	922	0.298	10.95	13.08	12.75	14.10	11.65	11.70	11.43	11.53	11.85	10.02
ADARB1	CAMKK2	63	1000	809	792	873	0.513	9.95	13.08	11.09	14.10	9.64	11.70	12.56	11.53	10.70	10.02
ARPC5L	CAMKK2	130	959	475	671	750	0.708	10.88	13.08	11.60	14.10	10.90	11.70	10.85	11.53	11.00	10.02
ATP2B1	CAMKK2	155	980	591	864	628	0.668	11.12	13.08	12.96	14.10	10.17	11.70	10.84	11.53	11.09	10.02
ATXN7L3B	CAMKK2	730	962	969	932	719	0.253	10.98	13.08	12.49	14.10	11.43	11.70	11.23	11.53	11.45	10.02
AACS	CAMLG	747	938	849	575	671	0.455	9.30	10.31	11.54	11.09	8.69	9.63	9.50	9.88	9.15	11.17
ANKRD17	CAMLG	932	940	957	910	924	0.027	11.01	10.31	12.06	11.09	11.84	9.63	12.00	9.88	12.31	11.17
ATP6V1F	CAMLG	870	965	987	785	801	0.220	11.65	10.31	12.12	11.09	10.01	9.63	11.09	9.88	11.04	11.17
C6orf136	CAMLG	723	976	930	845	507	0.450	9.40	10.31	10.68	11.09	9.74	9.63	8.54	9.88	10.53	11.17
ABHD16A	CAMSAP1	527	997	921	949	755	0.418	12.08	9.52	10.78	11.59	11.23	9.52	10.70	10.25	10.93	12.39
ACTR10	CAMSAP1	487	996	972	915	461	0.548	10.67	9.52	11.18	11.59	10.08	9.52	10.38	10.25	10.76	12.39
ACYP2	CAMSAP1	879	830	594	947	607	0.230	8.11	9.52	10.27	11.59	8.97	9.52	7.23	10.25	11.38	12.39
AP2A2	CAMSAP1	921	1000	922	963	964	0.115	11.52	9.52	12.91	11.59	12.19	9.52	12.23	10.25	11.17	12.39
APLP2	CAMSAP1	667	950	814	935	983	0.217	14.29	9.52	14.14	11.59	14.20	9.52	15.53	10.25	12.35	12.39
APOO	CAMSAP1	555	962	867	843	137	0.541	8.02	9.52	9.77	11.59	8.10	9.52	6.73	10.25	9.50	12.39
ATP5O	CAMSAP1	645	960	894	944	161	0.428	11.11	9.52	12.41	11.59	12.08	9.52	11.48	10.25	13.30	12.39
ATP6AP2	CAMSAP1	920	978	985	959	877	0.089	12.10	9.52	12.38	11.59	11.55	9.52	12.27	10.25	10.23	12.39
ATP6V0B	CAMSAP1	293	989	988	901	916	0.326	13.65	9.52	12.20	11.59	12.06	9.52	12.02	10.25	11.51	12.39
ATP6V1A	CAMSAP1	572	999	941	878	784	0.410	11.71	9.52	12.61	11.59	11.30	9.52	11.06	10.25	9.74	12.39
ATP6V1D	CAMSAP1	404	990	987	892	742	0.419	10.94	9.52	11.92	11.59	10.07	9.52	10.13	10.25	11.05	12.39
ATP6V1F	CAMSAP1	606	906	985	880	764	0.234	11.65	9.52	12.12	11.59	10.01	9.52	11.09	10.25	11.04	12.39
ATPIF1	CAMSAP1	851	970	66	919	156	0.555	10.91	9.52	11.98	11.59	12.11	9.52	10.56	10.25	11.77	12.39
ATXN10	CAMSAP1	970	996	923	975	833	0.141	10.75	9.52	12.39	11.59	11.53	9.52	11.48	10.25	11.84	12.39
AUH	CAMSAP1	826	990	541	910	374	0.592	8.85	9.52	9.37	11.59	9.70	9.52	8.57	10.25	9.66	12.39
C14orf2	CAMSAP1	364	950	845	922	273	0.516	10.51	9.52	12.11	11.59	11.13	9.52	10.10	10.25	11.87	12.39
C16orf80	CAMSAP1	931	996	420	916	339	0.569	9.28	9.52	10.04	11.59	9.73	9.52	8.98	10.25	8.51	12.39
C19orf12	CAMSAP1	974	1000	375	960	774	0.396	9.31	9.52	10.40	11.59	11.19	9.52	8.92	10.25	11.32	12.39
C1D	CAMSAP1	568	947	778	956	639	0.428	9.22	9.52	8.54	11.59	9.39	9.52	8.42	10.25	9.64	12.39
AAK1	CAMTA1	714	1000	839	693	130	0.627	9.20	9.34	12.16	12.02	7.27	9.92	7.95	9.84	9.38	10.44
ACSL3	CAMTA1	494	990	826	870	578	0.593	10.77	9.34	12.05	12.02	11.59	9.92	11.44	9.84	11.42	10.44
ACYP1	CAMTA1	861	871	866	582	797	0.189	7.01	9.34	8.42	12.02	6.82	9.92	7.49	9.84	8.69	10.44
ANKRD17	CAMTA1	744	973	936	912	472	0.400	11.01	9.34	12.06	12.02	11.84	9.92	12.00	9.84	12.31	10.44
ARFGEF2	CAMTA1	814	996	833	718	655	0.482	9.76	9.34	10.80	12.02	11.48	9.92	11.11	9.84	11.32	10.44
ARIH1	CAMTA1	797	991	952	974	828	0.206	11.38	9.34	10.78	12.02	10.92	9.92	11.48	9.84	12.18	10.44
ATP5A1	CAMTA1	972	997	860	553	892	0.355	12.98	9.34	14.59	12.02	14.03	9.92	13.65	9.84	15.13	10.44
ATP5B	CAMTA1	964	998	842	686	795	0.352	13.74	9.34	14.91	12.02	14.35	9.92	14.31	9.84	15.46	10.44
C2CD5	CAMTA1	550	991	937	601	522	0.677	10.11	9.34	11.21	12.02	9.94	9.92	10.43	9.84	10.04	10.44
ABHD16A	CAND1	632	979	959	937	723	0.333	12.08	10.66	10.78	11.94	11.23	11.56	10.70	11.81	10.93	10.79
ACTR1A	CAND1	641	986	989	976	808	0.267	12.69	10.66	13.19	11.94	11.53	11.56	12.55	11.81	13.28	10.79
ALDOA	CAND1	239	913	853	891	180	0.454	16.43	10.66	16.81	11.94	13.08	11.56	14.97	11.81	17.22	10.79
AP2A2	CAND1	906	978	968	961	963	0.057	11.52	10.66	12.91	11.94	12.19	11.56	12.23	11.81	11.17	10.79
AP2S1	CAND1	512	885	950	811	778	0.277	11.67	10.66	11.54	11.94	11.29	11.56	10.76	11.81	10.67	10.79
ARPC5L	CAND1	915	968	852	877	664	0.282	10.88	10.66	11.60	11.94	10.90	11.56	10.85	11.81	11.00	10.79
ASNA1	CAND1	731	945	991	882	777	0.223	11.29	10.66	11.23	11.94	10.27	11.56	10.37	11.81	10.86	10.79
ATP5H	CAND1	786	907	960	921	609	0.209	10.99	10.66	11.77	11.94	11.93	11.56	11.03	11.81	12.93	10.79
ATP5J	CAND1	823	944	974	961	389	0.282	9.74	10.66	11.36	11.94	11.91	11.56	10.12	11.81	12.56	10.79
ATP5O	CAND1	875	970	944	968	598	0.247	11.11	10.66	12.41	11.94	12.08	11.56	11.48	11.81	13.30	10.79
ATP6AP1	CAND1	525	964	996	907	965	0.248	13.29	10.66	13.19	11.94	11.67	11.56	13.09	11.81	11.37	10.79
ATP6V0B	CAND1	460	948	939	890	754	0.354	13.65	10.66	12.20	11.94	12.06	11.56	12.02	11.81	11.51	10.79
ATP6V0C	CAND1	104	771	972	778	630	0.206	14.12	10.66	14.26	11.94	12.30	11.56	12.91	11.81	12.61	10.79
ATP6V0D1	CAND1	318	953	984	851	888	0.310	13.64	10.66	12.71	11.94	11.55	11.56	12.10	11.81	12.12	10.79
ATPIF1	CAND1	894	925	492	788	610	0.454	10.91	10.66	11.98	11.94	12.11	11.56	10.56	11.81	11.77	10.79
BASP1	CAND1	212	911	864	404	730	0.525	14.45	10.66	14.01	11.94	8.06	11.56	10.34	11.81	6.68	10.79
C14orf2	CAND1	730	946	938	917	618	0.290	10.51	10.66	12.11	11.94	11.13	11.56	10.10	11.81	11.87	10.79
C16orf91	CAND1	943	948	948	853	764	0.142	8.17	10.66	8.01	11.94	8.25	11.56	6.84	11.81	8.78	10.79
BNIP3	CANX	921	901	812	891	955	0.050	9.50	12.69	11.44	13.36	12.07	14.28	9.81	14.34	12.63	13.24
AK3	CAPN2	945	957	418	926	175	0.478	9.79	12.44	11.03	12.38	12.78	11.25	11.16	14.65	12.93	12.91
ACTR6	CAPNS1	325	934	924	944	946	0.222	8.33	13.74	9.81	13.80	9.19	12.65	8.59	14.01	9.37	13.49
ADAR	CAPNS1	669	962	944	956	969	0.159	14.06	13.74	13.41	13.80	13.21	12.65	13.65	14.01	11.51	13.49
AKAP11	CAPNS1	351	886	931	866	881	0.205	9.71	13.74	12.22	13.80	10.48	12.65	11.26	14.01	10.48	13.49
ANAPC1	CAPNS1	595	956	991	970	931	0.193	9.84	13.74	9.97	13.80	9.78	12.65	9.80	14.01	10.50	13.49
ANKH	CAPNS1	150	930	828	906	431	0.493	10.99	13.74	12.55	13.80	11.70	12.65	10.76	14.01	12.06	13.49
ANKMY2	CAPNS1	517	985	658	876	591	0.649	8.70	13.74	10.40	13.80	9.01	12.65	8.93	14.01	9.78	13.49
ANKRD39	CAPNS1	605	927	827	871	669	0.368	8.37	13.74	8.42	13.80	8.37	12.65	7.01	14.01	13.32	13.49
ARFGEF2	CAPNS1	357	926	943	919	800	0.280	9.76	13.74	10.80	13.80	11.48	12.65	11.11	14.01	11.32	13.49
ATG5	CAPNS1	492	961	984	974	969	0.231	9.57	13.74	9.66	13.80	10.07	12.65	9.73	14.01	10.25	13.49
ATP5J	CAPNS1	683	978	981	999	746	0.264	9.74	13.74	11.36	13.80	11.91	12.65	10.12	14.01	12.56	13.49
ATP5L	CAPNS1	741	971	998	1000	878	0.162	11.23	13.74	11.58	13.80	11.61	12.65	11.14	14.01	12.13	13.49
ATP6V1D	CAPNS1	636	986	999	947	964	0.205	10.94	13.74	11.92	13.80	10.07	12.65	10.13	14.01	11.05	13.49
ATPAF1	CAPNS1	771	923	915	964	609	0.237	9.86	13.74	12.33	13.80	11.43	12.65	9.78	14.01	12.53	13.49
BASP1	CAPNS1	584	972	951	470	697	0.578	14.45	13.74	14.01	13.80	8.06	12.65	10.34	14.01	6.68	13.49
BCAS2	CAPNS1	617	975	988	842	861	0.302	9.60	13.74	10.38	13.80	9.89	12.65	9.11	14.01	10.37	13.49
BLOC1S6	CAPNS1	408	946	950	967	949	0.223	10.30	13.74	10.98	13.80	10.81	12.65	10.72	14.01	10.74	13.49
C11orf31	CAPNS1	764	977	968	987	999	0.111	10.44	13.74	11.01	13.80	11.48	12.65	10.56	14.01	10.69	13.49
C14orf2	CAPNS1	564	996	987	988	887	0.279	10.51	13.74	12.11	13.80	11.13	12.65	10.10	14.01	11.87	13.49
CAB39	CAPNS1	444	958	983	983	749	0.334	12.72	13.74	12.00	13.80	11.15	12.65	11.94	14.01	13.20	13.49
CAND1	CAPNS1	539	929	975	960	962	0.195	10.66	13.74	11.94	13.80	11.56	12.65	11.81	14.01	10.79	13.49
ATP6V0C	CAPRIN1	353	708	989	862	887	0.104	14.12	11.92	14.26	12.27	12.30	11.79	12.91	12.63	12.61	12.15
ACTR10	CAPRIN2	484	959	844	816	804	0.436	10.67	9.92	11.18	12.03	10.08	10.53	10.38	10.68	10.76	10.31
ANKRD17	CAPRIN2	911	990	866	893	606	0.342	11.01	9.92	12.06	12.03	11.84	10.53	12.00	10.68	12.31	10.31
APOO	CAPRIN2	557	893	630	562	160	0.661	8.02	9.92	9.77	12.03	8.10	10.53	6.73	10.68	9.50	10.31
ATP5A1	CAPRIN2	777	938	394	708	91	0.633	12.98	9.92	14.59	12.03	14.03	10.53	13.65	10.68	15.13	10.31
ATP5B	CAPRIN2	635	960	411	600	110	0.802	13.74	9.92	14.91	12.03	14.35	10.53	14.31	10.68	15.46	10.31
ATP6AP2	CAPRIN2	826	919	591	776	919	0.282	12.10	9.92	12.38	12.03	11.55	10.53	12.27	10.68	10.23	10.31
ATP6V1A	CAPRIN2	509	955	528	612	737	0.717	11.71	9.92	12.61	12.03	11.30	10.53	11.06	10.68	9.74	10.31
ATP6V1H	CAPRIN2	650	946	600	747	743	0.522	10.60	9.92	12.47	12.03	9.57	10.53	10.43	10.68	10.79	10.31
BTBD10	CAPRIN2	363	953	892	794	627	0.499	10.02	9.92	10.90	12.03	8.60	10.53	9.21	10.68	9.69	10.31
ANAPC1	CAPZA2	215	903	992	985	977	0.202	9.84	11.80	9.97	11.44	9.78	11.42	9.80	12.03	10.50	12.66
AP3M2	CAPZA2	42	949	744	800	914	0.419	9.51	11.80	11.41	11.44	8.40	11.42	10.06	12.03	9.31	12.66
C16orf80	CAPZA2	488	912	731	954	844	0.331	9.28	11.80	10.04	11.44	9.73	11.42	8.98	12.03	8.51	12.66
B4GALT5	CASD1	282	934	669	462	733	0.667	12.86	8.55	10.64	10.19	11.05	9.08	11.83	9.57	12.62	10.13
ARPC3	CASK	357	947	987	964	971	0.224	13.75	8.87	11.78	10.07	11.98	9.41	12.76	9.77	11.00	9.15
BAZ2B	CBFB	959	924	778	870	448	0.312	10.74	10.80	10.30	8.82	10.08	9.91	10.73	10.50	10.58	11.15
ATP11A	CBR1	581	932	243	771	600	0.638	11.64	9.48	10.03	11.27	10.95	11.97	12.72	9.88	10.74	9.43
C1orf198	CBR1	501	942	93	167	94	0.883	8.35	9.48	11.86	11.27	10.07	11.97	12.70	9.88	12.61	9.43
AGAP3	CBX6	565	983	544	877	979	0.483	10.63	11.57	14.51	13.94	11.68	9.70	12.61	11.69	11.36	10.34
ACYP2	CBX7	668	800	813	802	739	0.097	8.11	11.78	10.27	13.75	8.97	10.79	7.23	11.81	11.38	12.54
AP2S1	CBX7	503	979	709	69	851	0.676	11.67	11.78	11.54	13.75	11.29	10.79	10.76	11.81	10.67	12.54
APMAP	CBX7	946	944	632	454	570	0.565	13.88	11.78	11.98	13.75	14.10	10.79	11.96	11.81	10.81	12.54
ARHGEF11	CBX7	933	1000	943	722	928	0.237	11.85	11.78	12.40	13.75	11.19	10.79	11.69	11.81	11.19	12.54
ATP2B1	CBX7	486	940	499	347	532	0.864	11.12	11.78	12.96	13.75	10.17	10.79	10.84	11.81	11.09	12.54
ATP5G3	CBX7	743	984	553	191	33	0.820	11.42	11.78	12.34	13.75	13.03	10.79	11.62	11.81	13.28	12.54
ATP6V1B2	CBX7	878	978	767	293	739	0.514	13.91	11.78	13.89	13.75	11.51	10.79	12.98	11.81	12.08	12.54
BLOC1S6	CBX7	723	944	466	490	629	0.712	10.30	11.78	10.98	13.75	10.81	10.79	10.72	11.81	10.74	12.54
C15orf61	CBX7	397	895	656	750	779	0.448	7.55	11.78	7.69	13.75	7.55	10.79	6.69	11.81	9.87	12.54
C6orf211	CBX7	860	815	636	385	575	0.367	9.54	11.78	8.53	13.75	10.22	10.79	9.20	11.81	9.65	12.54
CAB39	CBX7	830	960	732	636	660	0.491	12.72	11.78	12.00	13.75	11.15	10.79	11.94	11.81	13.20	12.54
ALAS1	CCDC115	395	930	426	602	206	0.809	11.62	10.40	10.59	10.47	13.01	9.37	11.01	9.70	11.83	9.05
C9orf72	CCDC115	628	860	547	215	424	0.632	11.94	10.40	9.98	10.47	9.54	9.37	11.09	9.70	10.28	9.05
ANKH	CCDC126	27	975	782	828	150	0.645	10.99	8.93	12.55	7.05	11.70	8.23	10.76	7.30	12.06	8.82
ALAS1	CCDC132	323	946	459	392	564	0.860	11.62	9.03	10.59	10.28	13.01	9.11	11.01	9.04	11.83	10.08
ANKH	CCDC132	228	1000	864	496	413	0.818	10.99	9.03	12.55	10.28	11.70	9.11	10.76	9.04	12.06	10.08
APLP2	CCDC132	675	925	859	749	906	0.256	14.29	9.03	14.14	10.28	14.20	9.11	15.53	9.04	12.35	10.08
ARPC5L	CCDC132	728	971	676	298	867	0.556	10.88	9.03	11.60	10.28	10.90	9.11	10.85	9.04	11.00	10.08
ATP6AP1	CCDC132	420	969	982	825	967	0.307	13.29	9.03	13.19	10.28	11.67	9.11	13.09	9.04	11.37	10.08
ATP6V0C	CCDC132	63	811	874	602	764	0.283	14.12	9.03	14.26	10.28	12.30	9.11	12.91	9.04	12.61	10.08
ALAS1	CCDC25	428	937	830	692	721	0.502	11.62	9.14	10.59	10.96	13.01	10.65	11.01	9.49	11.83	11.02
AP2M1	CCDC25	634	993	990	981	961	0.203	13.46	9.14	14.96	10.96	12.91	10.65	13.65	9.49	12.83	11.02
AP2S1	CCDC25	552	933	976	883	823	0.271	11.67	9.14	11.54	10.96	11.29	10.65	10.76	9.49	10.67	11.02
ARFGEF2	CCDC25	963	1000	985	935	970	0.073	9.76	9.14	10.80	10.96	11.48	10.65	11.11	9.49	11.32	11.02
ATP5B	CCDC25	890	997	995	967	504	0.316	13.74	9.14	14.91	10.96	14.35	10.65	14.31	9.49	15.46	11.02
ATP6V0C	CCDC25	134	828	953	810	891	0.173	14.12	9.14	14.26	10.96	12.30	10.65	12.91	9.49	12.61	11.02
ATP6V0D1	CCDC25	334	966	966	926	900	0.286	13.64	9.14	12.71	10.96	11.55	10.65	12.10	9.49	12.12	11.02
ATP6V1B2	CCDC25	461	998	973	788	958	0.387	13.91	9.14	13.89	10.96	11.51	10.65	12.98	9.49	12.08	11.02
C6orf136	CCDC25	855	967	549	993	735	0.381	9.40	9.14	10.68	10.96	9.74	10.65	8.54	9.49	10.53	11.02
CALM3	CCDC25	775	953	929	893	703	0.256	13.18	9.14	16.54	10.96	12.50	10.65	12.75	9.49	12.99	11.02
CAPNS1	CCDC25	612	961	958	982	919	0.197	13.74	9.14	13.80	10.96	12.65	10.65	14.01	9.49	13.49	11.02
AACS	CCDC28A	475	965	141	608	635	0.808	9.30	10.97	11.54	10.03	8.69	10.08	9.50	9.04	9.15	8.93
ACO2	CCDC28A	230	818	457	730	249	0.521	10.98	10.97	13.28	10.03	11.13	10.08	10.79	9.04	14.13	8.93
AFG3L2	CCDC28A	647	963	498	696	552	0.729	9.57	10.97	10.17	10.03	10.61	10.08	9.71	9.04	12.40	8.93
ANKRD17	CCDC28A	865	976	791	798	716	0.367	11.01	10.97	12.06	10.03	11.84	10.08	12.00	9.04	12.31	8.93
APOO	CCDC28A	819	999	682	624	319	0.685	8.02	10.97	9.77	10.03	8.10	10.08	6.73	9.04	9.50	8.93
ARF3	CCDC28A	947	978	611	672	862	0.410	12.71	10.97	14.56	10.03	11.49	10.08	12.91	9.04	9.96	8.93
ATP1A1	CCDC28A	326	963	128	423	74	0.926	12.75	10.97	14.66	10.03	12.79	10.08	15.05	9.04	12.75	8.93
ATP5B	CCDC28A	888	991	590	654	316	0.666	13.74	10.97	14.91	10.03	14.35	10.08	14.31	9.04	15.46	8.93
ATP5G3	CCDC28A	888	993	770	710	144	0.552	11.42	10.97	12.34	10.03	13.03	10.08	11.62	9.04	13.28	8.93
ATP6AP1	CCDC28A	877	968	702	777	966	0.275	13.29	10.97	13.19	10.03	11.67	10.08	13.09	9.04	11.37	8.93
ATP6V0C	CCDC28A	503	864	591	642	682	0.519	14.12	10.97	14.26	10.03	12.30	10.08	12.91	9.04	12.61	8.93
B4GALT5	CCDC28A	945	969	121	185	240	0.716	12.86	10.97	10.64	10.03	11.05	10.08	11.83	9.04	12.62	8.93
BCAS2	CCDC28A	693	989	678	783	864	0.469	9.60	10.97	10.38	10.03	9.89	10.08	9.11	9.04	10.37	8.93
C6orf136	CCDC28A	498	988	883	902	445	0.584	9.40	10.97	10.68	10.03	9.74	10.08	8.54	9.04	10.53	8.93
CALM3	CCDC28A	909	927	946	823	709	0.170	13.18	10.97	16.54	10.03	12.50	10.08	12.75	9.04	12.99	8.93
CAMSAP1	CCDC28A	501	965	336	889	672	0.649	9.52	10.97	11.59	10.03	9.52	10.08	10.25	9.04	12.39	8.93
CAPRIN2	CCDC28A	507	962	801	935	847	0.379	9.92	10.97	12.03	10.03	10.53	10.08	10.68	9.04	10.31	8.93
ABHD10	CCDC47	850	970	406	595	371	0.718	9.39	10.94	10.13	11.13	10.64	11.98	8.78	11.88	9.44	12.42
ACYP2	CCDC47	784	951	820	775	727	0.349	8.11	10.94	10.27	11.13	8.97	11.98	7.23	11.88	11.38	12.42
ATP5O	CCDC47	733	943	938	922	621	0.279	11.11	10.94	12.41	11.13	12.08	11.98	11.48	11.88	13.30	12.42
AUH	CCDC47	950	985	760	659	705	0.433	8.85	10.94	9.37	11.13	9.70	11.98	8.57	11.88	9.66	12.42
AAK1	CCDC6	834	984	933	387	902	0.384	9.20	10.12	12.16	11.23	7.27	10.15	7.95	11.17	9.38	11.20
ABHD10	CCDC6	981	976	668	811	76	0.474	9.39	10.12	10.13	11.23	10.64	10.15	8.78	11.17	9.44	11.20
ANKMY2	CCDC6	986	986	758	882	25	0.409	8.70	10.12	10.40	11.23	9.01	10.15	8.93	11.17	9.78	11.20
APOO	CCDC6	680	977	910	799	222	0.509	8.02	10.12	9.77	11.23	8.10	10.15	6.73	11.17	9.50	11.20
ATP2A2	CCDC6	980	986	946	914	25	0.302	11.26	10.12	13.85	11.23	13.40	10.15	13.45	11.17	16.43	11.20
ATP5H	CCDC6	728	921	937	899	286	0.318	10.99	10.12	11.77	11.23	11.93	10.15	11.03	11.17	12.93	11.20
ATP5J	CCDC6	723	940	925	920	323	0.346	9.74	10.12	11.36	11.23	11.91	10.15	10.12	11.17	12.56	11.20
ATP5L	CCDC6	776	948	957	951	207	0.310	11.23	10.12	11.58	11.23	11.61	10.15	11.14	11.17	12.13	11.20
ATP6V0C	CCDC6	209	811	965	809	710	0.207	14.12	10.12	14.26	11.23	12.30	10.15	12.91	11.17	12.61	11.20
AUH	CCDC6	906	981	877	923	186	0.359	8.85	10.12	9.37	11.23	9.70	10.15	8.57	11.17	9.66	11.20
BASP1	CCDC6	235	958	891	196	188	0.721	14.45	10.12	14.01	11.23	8.06	10.15	10.34	11.17	6.68	11.20
C14orf2	CCDC6	619	966	927	865	163	0.476	10.51	10.12	12.11	11.23	11.13	10.15	10.10	11.17	11.87	11.20
C16orf80	CCDC6	947	986	809	875	200	0.406	9.28	10.12	10.04	11.23	9.73	10.15	8.98	11.17	8.51	11.20
CALM3	CCDC6	721	918	846	794	127	0.406	13.18	10.12	16.54	11.23	12.50	10.15	12.75	11.17	12.99	11.20
CCDC28A	CCDC6	708	986	700	868	575	0.546	10.97	10.12	10.03	11.23	10.08	10.15	9.04	11.17	8.93	11.20
ARF3	CCDC85B	485	559	341	574	690	0.059	12.71	10.52	14.56	12.32	11.49	9.33	12.91	10.51	9.96	10.20
ATP6V0A1	CCDC85B	560	529	467	585	514	0.022	11.61	10.52	13.73	12.32	11.24	9.33	11.48	10.51	12.41	10.20
APOO	CCDC92	535	984	853	796	696	0.528	8.02	10.51	9.77	12.82	8.10	10.87	6.73	11.02	9.50	11.58
ARF1	CCDC92	656	997	646	879	934	0.436	14.33	10.51	14.00	12.82	13.87	10.87	14.52	11.02	13.66	11.58
C14orf2	CCDC92	275	996	945	950	838	0.376	10.51	10.51	12.11	12.82	11.13	10.87	10.10	11.02	11.87	11.58
CAMLG	CCDC92	624	973	933	930	904	0.251	10.31	10.51	11.09	12.82	9.63	10.87	9.88	11.02	11.17	11.58
ANKH	CCNC	275	992	857	877	257	0.617	10.99	9.19	12.55	9.80	11.70	11.46	10.76	10.03	12.06	9.67
AP2M1	CCNC	361	956	825	947	994	0.298	13.46	9.19	14.96	9.80	12.91	11.46	13.65	10.03	12.83	9.67
APLP2	CCNC	578	973	651	961	977	0.364	14.29	9.19	14.14	9.80	14.20	11.46	15.53	10.03	12.35	9.67
APMAP	CCNC	513	977	685	960	867	0.442	13.88	9.19	11.98	9.80	14.10	11.46	11.96	10.03	10.81	9.67
ATP6AP1	CCNC	427	932	708	944	967	0.328	13.29	9.19	13.19	9.80	11.67	11.46	13.09	10.03	11.37	9.67
ATP6V0C	CCNC	71	746	762	845	781	0.123	14.12	9.19	14.26	9.80	12.30	11.46	12.91	10.03	12.61	9.67
ATP6V0D1	CCNC	228	911	893	917	969	0.214	13.64	9.19	12.71	9.80	11.55	11.46	12.10	10.03	12.12	9.67
ATP6V1B2	CCNC	464	972	820	925	1000	0.336	13.91	9.19	13.89	9.80	11.51	11.46	12.98	10.03	12.08	9.67
CALM3	CCNC	534	854	715	764	587	0.408	13.18	9.19	16.54	9.80	12.50	11.46	12.75	10.03	12.99	9.67
ARF5	CCND2	116	937	656	634	737	0.611	12.12	11.18	12.01	11.92	11.41	7.97	11.15	11.63	11.21	8.32
AFG3L2	CCNDBP1	353	1000	994	973	799	0.367	9.57	12.79	10.17	10.52	10.61	10.01	9.71	10.76	12.40	11.19
AMN1	CCNDBP1	969	992	978	889	911	0.111	8.84	12.79	8.55	10.52	5.90	10.01	6.21	10.76	8.60	11.19
ANXA6	CCNDBP1	38	996	963	883	838	0.400	13.34	12.79	13.41	10.52	13.42	10.01	13.49	10.76	13.33	11.19
AP3M2	CCNDBP1	17	1000	847	707	839	0.553	9.51	12.79	11.41	10.52	8.40	10.01	10.06	10.76	9.31	11.19
ARFGEF2	CCNDBP1	102	991	986	932	844	0.351	9.76	12.79	10.80	10.52	11.48	10.01	11.11	10.76	11.32	11.19
ARMCX3	CCNDBP1	242	997	966	828	821	0.436	10.37	12.79	11.74	10.52	10.85	10.01	11.43	10.76	10.96	11.19
C11orf31	CCNDBP1	566	942	900	918	966	0.221	10.44	12.79	11.01	10.52	11.48	10.01	10.56	10.76	10.69	11.19
C16orf45	CCNDBP1	391	1000	39	632	819	0.774	8.03	12.79	13.31	10.52	9.72	10.01	9.12	10.76	11.79	11.19
C1orf216	CCNDBP1	565	1000	965	717	959	0.397	9.02	12.79	12.43	10.52	8.54	10.01	9.54	10.76	10.25	11.19
C6orf136	CCNDBP1	101	986	630	993	360	0.664	9.40	12.79	10.68	10.52	9.74	10.01	8.54	10.76	10.53	11.19
ACAT2	CCNH	853	973	784	144	530	0.613	9.24	10.62	9.59	9.71	11.06	9.93	9.07	9.89	7.47	10.11
ACLY	CCNH	857	986	615	237	908	0.532	11.68	10.62	11.40	9.71	11.29	9.93	12.19	9.89	10.58	10.11
ANKMY2	CCNH	871	985	197	550	69	0.759	8.70	10.62	10.40	9.71	9.01	9.93	8.93	9.89	9.78	10.11
AP2M1	CCNH	555	933	922	540	921	0.397	13.46	10.62	14.96	9.71	12.91	9.93	13.65	9.89	12.83	10.11
AP3M2	CCNH	837	906	476	780	422	0.503	9.51	10.62	11.41	9.71	8.40	9.93	10.06	9.89	9.31	10.11
ARF1	CCNH	845	974	965	784	961	0.171	14.33	10.62	14.00	9.71	13.87	9.93	14.52	9.89	13.66	10.11
ATP6AP1	CCNH	752	956	835	460	734	0.501	13.29	10.62	13.19	9.71	11.67	9.93	13.09	9.89	11.37	10.11
ATP6V0C	CCNH	483	844	966	558	803	0.336	14.12	10.62	14.26	9.71	12.30	9.93	12.91	9.89	12.61	10.11
ATP6V0D1	CCNH	285	932	855	232	823	0.525	13.64	10.62	12.71	9.71	11.55	9.93	12.10	9.89	12.12	10.11
ATRN	CCNH	837	922	434	319	829	0.511	9.75	10.62	11.74	9.71	12.25	9.93	10.87	9.89	10.97	10.11
ATXN10	CCNH	913	973	894	601	876	0.304	10.75	10.62	12.39	9.71	11.53	9.93	11.48	9.89	11.84	10.11
BNIP3	CCNH	862	940	638	221	833	0.464	9.50	10.62	11.44	9.71	12.07	9.93	9.81	9.89	12.63	10.11
CALM3	CCNH	618	818	557	508	377	0.544	13.18	10.62	16.54	9.71	12.50	9.93	12.75	9.89	12.99	10.11
CAPNS1	CCNH	616	958	939	654	922	0.350	13.74	10.62	13.80	9.71	12.65	9.93	14.01	9.89	13.49	10.11
CAPZB	CCNH	607	995	966	802	939	0.333	14.05	10.62	12.54	9.71	12.11	9.93	13.28	9.89	13.26	10.11
CAMTA1	CCNI	791	992	970	955	852	0.200	9.34	14.00	12.02	14.06	9.92	12.05	9.84	13.77	10.44	13.34
ACP1	CCNY	221	997	995	995	997	0.251	10.60	11.79	11.17	12.12	11.47	11.64	10.94	11.52	11.32	11.36
ALAS1	CCNY	217	831	662	869	612	0.359	11.62	11.79	10.59	12.12	13.01	11.64	11.01	11.52	11.83	11.36
ANAPC1	CCNY	437	936	986	968	922	0.225	9.84	11.79	9.97	12.12	9.78	11.64	9.80	11.52	10.50	11.36
ANKMY2	CCNY	760	954	693	866	528	0.484	8.70	11.79	10.40	12.12	9.01	11.64	8.93	11.52	9.78	11.36
AP2M1	CCNY	715	976	992	965	997	0.136	13.46	11.79	14.96	12.12	12.91	11.64	13.65	11.52	12.83	11.36
AP3M2	CCNY	199	989	506	694	843	0.707	9.51	11.79	11.41	12.12	8.40	11.64	10.06	11.52	9.31	11.36
ATP5O	CCNY	742	988	979	976	646	0.304	11.11	11.79	12.41	12.12	12.08	11.64	11.48	11.52	13.30	11.36
C14orf2	CCNY	793	985	957	927	775	0.244	10.51	11.79	12.11	12.12	11.13	11.64	10.10	11.52	11.87	11.36
CCDC132	CCNY	837	930	898	824	964	0.116	9.03	11.79	10.28	12.12	9.11	11.64	9.04	11.52	10.08	11.36
ACSL1	CCP110	848	987	296	241	827	0.636	16.81	9.50	10.48	10.63	15.79	8.53	14.09	9.59	15.03	9.45
ATAD1	CCSAP	982	993	732	746	280	0.506	9.64	9.70	10.63	11.41	10.56	7.88	10.49	8.33	11.53	7.83
BNIP3	CCSAP	808	976	829	588	82	0.590	9.50	9.70	11.44	11.41	12.07	7.88	9.81	8.33	12.63	7.83
ACAT2	CCSER2	636	954	788	423	691	0.601	9.24	10.75	9.59	11.41	11.06	10.15	9.07	11.24	7.47	12.40
ADSL	CCSER2	376	989	913	491	965	0.539	10.59	10.75	9.07	11.41	10.19	10.15	9.86	11.24	12.92	12.40
ALDOA	CCSER2	396	869	865	501	726	0.442	16.43	10.75	16.81	11.41	13.08	10.15	14.97	11.24	17.22	12.40
ANXA6	CCSER2	927	914	797	796	813	0.168	13.34	10.75	13.41	11.41	13.42	10.15	13.49	11.24	13.33	12.40
APOO	CCSER2	365	972	875	545	724	0.622	8.02	10.75	9.77	11.41	8.10	10.15	6.73	11.24	9.50	12.40
ATP5A1	CCSER2	572	983	861	742	844	0.457	12.98	10.75	14.59	11.41	14.03	10.15	13.65	11.24	15.13	12.40
ATP5B	CCSER2	485	987	856	730	791	0.535	13.74	10.75	14.91	11.41	14.35	10.15	14.31	11.24	15.46	12.40
ATP5C1	CCSER2	296	992	912	821	905	0.415	11.21	10.75	11.93	11.41	12.64	10.15	11.58	11.24	13.26	12.40
ATP5G3	CCSER2	474	969	881	628	666	0.601	11.42	10.75	12.34	11.41	13.03	10.15	11.62	11.24	13.28	12.40
ATP5H	CCSER2	334	912	913	675	830	0.365	10.99	10.75	11.77	11.41	11.93	10.15	11.03	11.24	12.93	12.40
ATP5J	CCSER2	252	956	923	806	837	0.379	9.74	10.75	11.36	11.41	11.91	10.15	10.12	11.24	12.56	12.40
ATP6V0B	CCSER2	42	907	898	566	391	0.582	13.65	10.75	12.20	11.41	12.06	10.15	12.02	11.24	11.51	12.40
ATP6V0C	CCSER2	309	717	914	559	576	0.258	14.12	10.75	14.26	11.41	12.30	10.15	12.91	11.24	12.61	12.40
ATP6V0D1	CCSER2	26	907	889	443	661	0.539	13.64	10.75	12.71	11.41	11.55	10.15	12.10	11.24	12.12	12.40
ATXN10	CCSER2	883	995	962	892	844	0.200	10.75	10.75	12.39	11.41	11.53	10.15	11.48	11.24	11.84	12.40
AUH	CCSER2	550	998	898	918	911	0.357	8.85	10.75	9.37	11.41	9.70	10.15	8.57	11.24	9.66	12.40
C11orf73	CCSER2	620	992	925	823	883	0.358	9.65	10.75	9.54	11.41	9.39	10.15	9.20	11.24	10.43	12.40
C14orf119	CCSER2	20	989	974	582	497	0.700	10.99	10.75	9.37	11.41	10.03	10.15	10.12	11.24	9.92	12.40
C2orf47	CCSER2	61	989	935	670	923	0.464	8.58	10.75	7.69	11.41	10.11	10.15	7.32	11.24	9.27	12.40
AFTPH	CCT2	804	1000	856	938	982	0.210	11.51	10.71	10.31	11.58	10.58	11.20	10.39	11.54	10.27	12.17
ALAS1	CCT2	482	999	788	896	354	0.656	11.62	10.71	10.59	11.58	13.01	11.20	11.01	11.54	11.83	12.17
ANKH	CCT2	423	994	816	723	17	0.719	10.99	10.71	12.55	11.58	11.70	11.20	10.76	11.54	12.06	12.17
ATP6V1D	CCT2	783	990	1000	988	836	0.181	10.94	10.71	11.92	11.58	10.07	11.20	10.13	11.54	11.05	12.17
CALM3	CCT2	753	893	733	839	155	0.373	13.18	10.71	16.54	11.58	12.50	11.20	12.75	11.54	12.99	12.17
C16orf72	CCT3	280	998	953	557	798	0.592	12.14	11.84	9.89	12.29	10.72	12.53	10.83	12.15	11.51	12.75
AP1G1	CCT4	622	982	987	804	961	0.280	12.11	11.36	11.51	11.87	12.25	11.52	12.16	11.78	12.05	12.30
ADAR	CCT7	575	999	961	939	964	0.279	14.06	11.96	13.41	12.27	13.21	11.95	13.65	12.36	11.51	13.25
C16orf72	CCT7	354	965	929	636	915	0.440	12.14	11.96	9.89	12.27	10.72	11.95	10.83	12.36	11.51	13.25
AAK1	CCT8	748	989	945	288	788	0.487	9.20	11.62	12.16	11.73	7.27	11.86	7.95	12.18	9.38	12.54
APLP2	CCT8	716	990	955	923	982	0.192	14.29	11.62	14.14	11.73	14.20	11.86	15.53	12.18	12.35	12.54
APMAP	CCT8	486	993	945	998	852	0.341	13.88	11.62	11.98	11.73	14.10	11.86	11.96	12.18	10.81	12.54
ARL3	CCT8	530	971	981	891	962	0.265	9.35	11.62	11.61	11.73	8.63	11.86	9.59	12.18	9.10	12.54
ATP6AP1	CCT8	634	984	1000	975	979	0.182	13.29	11.62	13.19	11.73	11.67	11.86	13.09	12.18	11.37	12.54
ATP6V0C	CCT8	304	868	1000	938	891	0.184	14.12	11.62	14.26	11.73	12.30	11.86	12.91	12.18	12.61	12.54
ATP6V1B2	CCT8	441	992	997	988	987	0.251	13.91	11.62	13.89	11.73	11.51	11.86	12.98	12.18	12.08	12.54
C16orf72	CCT8	553	995	974	773	925	0.378	12.14	11.62	9.89	11.73	10.72	11.86	10.83	12.18	11.51	12.54
CALM3	CCT8	858	903	801	879	693	0.191	13.18	11.62	16.54	11.73	12.50	11.86	12.75	12.18	12.99	12.54
CCDC28A	CCT8	672	999	476	592	933	0.649	10.97	11.62	10.03	11.73	10.08	11.86	9.04	12.18	8.93	12.54
ARRDC2	CD22	657	899	418	163	51	0.720	12.03	10.95	10.43	9.84	10.05	6.06	12.48	8.08	13.11	4.59
BAZ2B	CD22	285	714	538	456	280	0.409	10.74	10.95	10.30	9.84	10.08	6.06	10.73	8.08	10.58	4.59
C17orf85	CD22	398	952	561	806	326	0.721	10.34	10.95	9.35	9.84	9.91	6.06	10.12	8.08	10.00	4.59
ASMTL-AS1	CD248	502	64	516	286	314	0.000	7.58	7.61	7.10	6.40	8.65	7.42	7.13	10.89	6.83	9.61
CASZ1	CD79A	651	453	313	182	437	0.000	8.90	11.51	5.17	1.87	7.92	5.22	10.33	6.01	11.33	3.79
ABCD3	CD81	240	753	607	718	586	0.300	9.25	11.98	10.18	14.13	12.70	14.93	10.62	15.47	10.84	12.42
ADIPOR2	CD81	714	728	802	613	652	0.102	11.66	11.98	11.71	14.13	12.99	14.93	12.53	15.47	11.90	12.42
AK3	CD81	860	820	766	950	236	0.187	9.79	11.98	11.03	14.13	12.78	14.93	11.16	15.47	12.93	12.42
BBS2	CD81	669	855	851	843	813	0.122	9.50	11.98	12.03	14.13	9.46	14.93	9.93	15.47	11.15	12.42
ALG5	CD9	652	786	692	806	506	0.254	9.21	10.34	7.92	10.82	10.25	10.61	9.13	13.33	8.98	10.75
AMPD3	CD9	682	907	581	149	51	0.682	11.34	10.34	9.32	10.82	7.03	10.61	9.17	13.33	12.10	10.75
ANKFY1	CD9	686	732	428	818	156	0.255	10.81	10.34	11.16	10.82	10.91	10.61	11.50	13.33	11.08	10.75
ANKIB1	CD9	647	785	671	806	530	0.254	9.71	10.34	10.84	10.82	9.91	10.61	10.49	13.33	10.24	10.75
ATG3	CD9	617	851	766	817	612	0.296	11.74	10.34	10.16	10.82	10.19	10.61	10.37	13.33	10.08	10.75
BBS2	CD9	688	522	596	775	602	0.000	9.50	10.34	12.03	10.82	9.46	10.61	9.93	13.33	11.15	10.75
BEST1	CD9	443	961	780	105	574	0.745	12.24	10.34	9.62	10.82	7.77	10.61	10.03	13.33	7.30	10.75
BROX	CD9	631	516	674	780	198	0.008	10.82	10.34	9.98	10.82	10.05	10.61	10.20	13.33	10.43	10.75
C17orf85	CD9	742	910	731	710	695	0.381	10.34	10.34	9.35	10.82	9.91	10.61	10.12	13.33	10.00	10.75
C1orf27	CD9	640	743	748	786	650	0.098	8.86	10.34	9.03	10.82	10.61	10.61	9.78	13.33	9.76	10.75
C21orf91	CD9	677	893	689	539	560	0.553	9.55	10.34	7.59	10.82	8.42	10.61	8.66	13.33	8.42	10.75
CAPN3	CD9	511	915	18	654	287	0.748	10.90	10.34	10.87	10.82	11.03	10.61	10.84	13.33	14.61	10.75
AHCYL1	CD99	578	768	961	826	660	0.149	11.39	12.75	14.46	10.87	12.09	12.73	12.49	13.32	12.94	12.06
ARHGEF6	CD99	505	772	847	653	156	0.329	11.94	12.75	10.49	10.87	8.77	12.73	11.28	13.32	11.80	12.06
ABHD10	CD99L2	766	972	500	955	100	0.584	9.39	10.94	10.13	13.69	10.64	12.11	8.78	11.39	9.44	13.52
ACOT7	CD99L2	25	1000	605	951	871	0.536	8.95	10.94	12.56	13.69	9.34	12.11	9.09	11.39	7.77	13.52
ACTR6	CD99L2	667	949	890	960	851	0.220	8.33	10.94	9.81	13.69	9.19	12.11	8.59	11.39	9.37	13.52
AFTPH	CD99L2	872	963	887	931	961	0.101	11.51	10.94	10.31	13.69	10.58	12.11	10.39	11.39	10.27	13.52
AMN1	CD99L2	873	988	936	799	984	0.180	8.84	10.94	8.55	13.69	5.90	12.11	6.21	11.39	8.60	13.52
APOO	CD99L2	717	982	915	850	183	0.473	8.02	10.94	9.77	13.69	8.10	12.11	6.73	11.39	9.50	13.52
ATG5	CD99L2	744	984	928	965	969	0.165	9.57	10.94	9.66	13.69	10.07	12.11	9.73	11.39	10.25	13.52
ATP5L	CD99L2	716	951	944	977	359	0.346	11.23	10.94	11.58	13.69	11.61	12.11	11.14	11.39	12.13	13.52
ATP6V1E1	CD99L2	981	1000	967	962	978	0.056	12.33	10.94	13.63	13.69	11.12	12.11	12.27	11.39	12.65	13.52
AUH	CD99L2	738	990	724	943	228	0.527	8.85	10.94	9.37	13.69	9.70	12.11	8.57	11.39	9.66	13.52
BTRC	CD99L2	740	1000	798	961	857	0.322	9.28	10.94	11.65	13.69	9.91	12.11	9.24	11.39	10.51	13.52
C11orf31	CD99L2	721	970	873	946	887	0.227	10.44	10.94	11.01	13.69	11.48	12.11	10.56	11.39	10.69	13.52
C12orf4	CD99L2	816	978	856	818	872	0.275	8.74	10.94	9.32	13.69	8.57	12.11	8.46	11.39	9.73	13.52
C14orf2	CD99L2	816	990	920	959	297	0.383	10.51	10.94	12.11	13.69	11.13	12.11	10.10	11.39	11.87	13.52
C1D	CD99L2	908	939	849	965	606	0.227	9.22	10.94	8.54	13.69	9.39	12.11	8.42	11.39	9.64	13.52
C1QBP	CD99L2	579	954	942	775	763	0.379	10.41	10.94	10.78	13.69	11.31	12.11	10.25	11.39	11.65	13.52
C6orf136	CD99L2	412	992	740	974	409	0.627	9.40	10.94	10.68	13.69	9.74	12.11	8.54	11.39	10.53	13.52
CAND1	CD99L2	643	991	880	948	628	0.432	10.66	10.94	11.94	13.69	11.56	12.11	11.81	11.39	10.79	13.52
ATP1A1	CDADC1	554	955	341	616	267	0.825	12.75	9.97	14.66	8.70	12.79	8.98	15.05	8.26	12.75	8.70
ATP5A1	CDADC1	491	996	662	821	867	0.567	12.98	9.97	14.59	8.70	14.03	8.98	13.65	8.26	15.13	8.70
ATP6V0D1	CDADC1	443	941	603	692	653	0.658	13.64	9.97	12.71	8.70	11.55	8.98	12.10	8.26	12.12	8.70
BABAM1	CDADC1	160	985	764	900	854	0.461	11.65	9.97	11.68	8.70	10.88	8.98	10.58	8.26	11.69	8.70
BLVRA	CDADC1	362	986	362	823	769	0.676	10.54	9.97	9.62	8.70	6.99	8.98	10.47	8.26	10.30	8.70
CALM2	CDADC1	572	999	540	952	847	0.542	13.46	9.97	15.82	8.70	13.44	8.98	14.32	8.26	12.64	8.70
ANKMY2	CDC123	379	1000	604	686	303	0.855	8.70	11.51	10.40	10.35	9.01	10.16	8.93	9.87	9.78	10.37
ANKRD46	CDC123	448	994	387	815	724	0.719	7.77	11.51	10.73	10.35	10.25	10.16	8.45	9.87	10.73	10.37
APLP2	CDC123	762	987	997	923	992	0.144	14.29	11.51	14.14	10.35	14.20	10.16	15.53	9.87	12.35	10.37
ATP6V0C	CDC123	293	913	999	930	953	0.206	14.12	11.51	14.26	10.35	12.30	10.16	12.91	9.87	12.61	10.37
ADK	CDC27	829	948	749	840	962	0.213	9.38	10.50	8.69	10.45	11.59	10.52	9.31	10.97	9.63	11.31
AMN1	CDC27	740	988	949	915	910	0.219	8.84	10.50	8.55	10.45	5.90	10.52	6.21	10.97	8.60	11.31
ANAPC13	CDC27	863	990	995	882	983	0.121	10.46	10.50	10.62	10.45	10.51	10.52	10.28	10.97	11.10	11.31
ANKH	CDC27	375	994	871	961	382	0.572	10.99	10.50	12.55	10.45	11.70	10.52	10.76	10.97	12.06	11.31
ANKMY2	CDC27	988	1000	630	875	418	0.503	8.70	10.50	10.40	10.45	9.01	10.52	8.93	10.97	9.78	11.31
ANKRD46	CDC27	981	1000	248	809	774	0.468	7.77	10.50	10.73	10.45	10.25	10.52	8.45	10.97	10.73	11.31
ANXA6	CDC27	597	947	878	785	573	0.477	13.34	10.50	13.41	10.45	13.42	10.52	13.49	10.97	13.33	11.31
AP2S1	CDC27	553	873	947	694	779	0.296	11.67	10.50	11.54	10.45	11.29	10.52	10.76	10.97	10.67	11.31
ATP6AP1	CDC27	635	953	991	810	881	0.267	13.29	10.50	13.19	10.45	11.67	10.52	13.09	10.97	11.37	11.31
AUH	CDC27	964	1000	766	885	759	0.313	8.85	10.50	9.37	10.45	9.70	10.52	8.57	10.97	9.66	11.31
C6orf136	CDC27	704	966	568	752	609	0.616	9.40	10.50	10.68	10.45	9.74	10.52	8.54	10.97	10.53	11.31
CALM3	CDC27	712	873	743	823	562	0.326	13.18	10.50	16.54	10.45	12.50	10.52	12.75	10.97	12.99	11.31
CAPNS1	CDC27	543	933	994	944	940	0.195	13.74	10.50	13.80	10.45	12.65	10.52	14.01	10.97	13.49	11.31
AP3M2	CDC37	734	873	854	829	856	0.110	9.51	12.73	11.41	12.87	8.40	12.45	10.06	13.34	9.31	13.20
ATP5G3	CDC37	946	974	874	559	783	0.367	11.42	12.73	12.34	12.87	13.03	12.45	11.62	13.34	13.28	13.20
C12orf57	CDC37	732	918	949	869	990	0.117	9.49	12.73	9.98	12.87	9.90	12.45	9.87	13.34	9.69	13.20
C14orf2	CDC37	709	956	972	628	997	0.287	10.51	12.73	12.11	12.87	11.13	12.45	10.10	13.34	11.87	13.20
C6orf136	CDC37	940	993	961	500	844	0.363	9.40	12.73	10.68	12.87	9.74	12.45	8.54	13.34	10.53	13.20
AFG3L2	CDC37L1	879	959	655	732	910	0.330	9.57	8.51	10.17	9.86	10.61	11.36	9.71	9.42	12.40	12.03
ALDOA	CDC37L1	183	930	814	694	258	0.606	16.43	8.51	16.81	9.86	13.08	11.36	14.97	9.42	17.22	12.03
AMN1	CDC37L1	882	974	463	908	944	0.331	8.84	8.51	8.55	9.86	5.90	11.36	6.21	9.42	8.60	12.03
ANAPC1	CDC37L1	780	959	709	822	552	0.486	9.84	8.51	9.97	9.86	9.78	11.36	9.80	9.42	10.50	12.03
ANAPC13	CDC37L1	943	984	657	781	835	0.360	10.46	8.51	10.62	9.86	10.51	11.36	10.28	9.42	11.10	12.03
APOO	CDC37L1	695	991	523	528	194	0.859	8.02	8.51	9.77	9.86	8.10	11.36	6.73	9.42	9.50	12.03
ASH2L	CDC37L1	912	967	491	564	895	0.498	10.96	8.51	10.73	9.86	10.02	11.36	9.82	9.42	11.01	12.03
ATP5A1	CDC37L1	900	981	580	731	136	0.607	12.98	8.51	14.59	9.86	14.03	11.36	13.65	9.42	15.13	12.03
ATP5B	CDC37L1	779	984	607	809	153	0.621	13.74	8.51	14.91	9.86	14.35	11.36	14.31	9.42	15.46	12.03
ATP5C1	CDC37L1	934	995	626	792	378	0.564	11.21	8.51	11.93	9.86	12.64	11.36	11.58	9.42	13.26	12.03
ATP5G3	CDC37L1	872	978	614	686	95	0.620	11.42	8.51	12.34	9.86	13.03	11.36	11.62	9.42	13.28	12.03
ATP6AP1	CDC37L1	489	934	605	749	493	0.691	13.29	8.51	13.19	9.86	11.67	11.36	13.09	9.42	11.37	12.03
ATP6AP2	CDC37L1	967	998	735	915	702	0.337	12.10	8.51	12.38	9.86	11.55	11.36	12.27	9.42	10.23	12.03
ATP6V0C	CDC37L1	101	800	806	728	688	0.242	14.12	8.51	14.26	9.86	12.30	11.36	12.91	9.42	12.61	12.03
ATP6V1A	CDC37L1	937	989	614	668	673	0.532	11.71	8.51	12.61	9.86	11.30	11.36	11.06	9.42	9.74	12.03
BLVRA	CDC37L1	709	965	385	764	665	0.611	10.54	8.51	9.62	9.86	6.99	11.36	10.47	9.42	10.30	12.03
C14orf2	CDC37L1	879	966	621	691	241	0.587	10.51	8.51	12.11	9.86	11.13	11.36	10.10	9.42	11.87	12.03
CAPNS1	CDC37L1	403	928	833	862	693	0.412	13.74	8.51	13.80	9.86	12.65	11.36	14.01	9.42	13.49	12.03
CCT7	CDC37L1	674	990	630	693	867	0.548	11.96	8.51	12.27	9.86	11.95	11.36	12.36	9.42	13.25	12.03
AACS	CDC40	541	994	864	878	790	0.452	9.30	10.33	11.54	9.45	8.69	9.52	9.50	9.22	9.15	9.83
AP3M2	CDC40	250	1000	783	785	720	0.606	9.51	10.33	11.41	9.45	8.40	9.52	10.06	9.22	9.31	9.83
ATP6AP1	CDC40	668	974	978	927	819	0.254	13.29	10.33	13.19	9.45	11.67	9.52	13.09	9.22	11.37	9.83
CAPNS1	CDC40	582	949	963	946	814	0.253	13.74	10.33	13.80	9.45	12.65	9.52	14.01	9.22	13.49	9.83
CBX7	CDC40	916	919	697	522	709	0.416	11.78	10.33	13.75	9.45	10.79	9.52	11.81	9.22	12.54	9.83
CD22	CDC42EP2	384	895	567	359	521	0.746	10.95	10.73	9.84	8.32	6.06	7.38	8.08	9.70	4.59	8.47
ACSS1	CDC42EP4	401	901	470	394	156	0.802	11.00	9.53	12.16	12.29	9.81	11.20	11.33	11.72	11.58	10.86
AXL	CDC42EP4	109	967	749	864	509	0.623	6.61	9.53	10.44	12.29	8.53	11.20	11.57	11.72	10.02	10.86
CABLES1	CDC42EP4	205	796	525	451	79	0.580	6.43	9.53	11.89	12.29	9.34	11.20	9.38	11.72	7.16	10.86
ABHD10	CDC42SE2	947	969	784	581	183	0.532	9.39	12.14	10.13	11.39	10.64	10.23	8.78	10.88	9.44	10.12
ARHGEF7	CDC42SE2	963	913	933	891	810	0.062	11.16	12.14	12.80	11.39	11.77	10.23	12.22	10.88	12.19	10.12
ATP5J	CDC42SE2	641	979	903	704	357	0.584	9.74	12.14	11.36	11.39	11.91	10.23	10.12	10.88	12.56	10.12
ATP5O	CDC42SE2	700	973	889	758	143	0.522	11.11	12.14	12.41	11.39	12.08	10.23	11.48	10.88	13.30	10.12
ATRN	CDC42SE2	903	992	869	805	984	0.203	9.75	12.14	11.74	11.39	12.25	10.23	10.87	10.88	10.97	10.12
BABAM1	CDC42SE2	486	961	971	743	693	0.473	11.65	12.14	11.68	11.39	10.88	10.23	10.58	10.88	11.69	10.12
BCL2L2	CDC42SE2	937	997	909	808	969	0.182	8.91	12.14	13.06	11.39	10.56	10.23	11.72	10.88	10.79	10.12
AACS	CDK14	505	995	259	229	773	0.851	9.30	9.57	11.54	11.72	8.69	9.84	9.50	9.75	9.15	9.16
AAK1	CDK14	395	1000	703	685	724	0.694	9.20	9.57	12.16	11.72	7.27	9.84	7.95	9.75	9.38	9.16
ACOT7	CDK14	40	993	845	542	702	0.692	8.95	9.57	12.56	11.72	9.34	9.84	9.09	9.75	7.77	9.16
ACTR3B	CDK14	806	1000	579	758	739	0.559	8.08	9.57	10.67	11.72	8.74	9.84	7.19	9.75	9.22	9.16
AGK	CDK14	355	975	858	907	862	0.387	9.76	9.57	10.56	11.72	10.09	9.84	9.99	9.75	9.39	9.16
ANAPC1	CDK14	479	992	749	818	948	0.476	9.84	9.57	9.97	11.72	9.78	9.84	9.80	9.75	10.50	9.16
ANXA6	CDK14	212	997	691	750	688	0.679	13.34	9.57	13.41	11.72	13.42	9.84	13.49	9.75	13.33	9.16
APOO	CDK14	588	984	583	440	688	0.788	8.02	9.57	9.77	11.72	8.10	9.84	6.73	9.75	9.50	9.16
ARFGEF2	CDK14	644	982	672	752	951	0.455	9.76	9.57	10.80	11.72	11.48	9.84	11.11	9.75	11.32	9.16
ARHGEF9	CDK14	404	1000	846	721	718	0.608	9.21	9.57	13.15	11.72	8.97	9.84	9.44	9.75	8.78	9.16
ARPC5L	CDK14	511	990	353	450	864	0.792	10.88	9.57	11.60	11.72	10.90	9.84	10.85	9.75	11.00	9.16
ATP1B1	CDK14	234	1000	768	189	653	0.789	7.56	9.57	13.70	11.72	12.15	9.84	11.50	9.75	13.79	9.16
ATP2B1	CDK14	580	1000	754	884	953	0.414	11.12	9.57	12.96	11.72	10.17	9.84	10.84	9.75	11.09	9.16
ATP6V0C	CDK14	243	885	512	431	742	0.643	14.12	9.57	14.26	11.72	12.30	9.84	12.91	9.75	12.61	9.16
ATP6V1A	CDK14	993	1000	785	473	913	0.405	11.71	9.57	12.61	11.72	11.30	9.84	11.06	9.75	9.74	9.16
ATP6V1B2	CDK14	916	1000	774	668	923	0.359	13.91	9.57	13.89	11.72	11.51	9.84	12.98	9.75	12.08	9.16
ATP6V1H	CDK14	933	997	704	604	959	0.394	10.60	9.57	12.47	11.72	9.57	9.84	10.43	9.75	10.79	9.16
ATXN7L3B	CDK14	910	1000	920	823	961	0.193	10.98	9.57	12.49	11.72	11.43	9.84	11.23	9.75	11.45	9.16
BTBD9	CDK14	849	975	736	437	877	0.469	10.00	9.57	11.61	11.72	8.51	9.84	9.93	9.75	9.62	9.16
C12orf43	CDK14	624	1000	727	519	796	0.667	8.94	9.57	9.82	11.72	8.90	9.84	8.08	9.75	8.51	9.16
C15orf61	CDK14	322	848	822	688	428	0.441	7.55	9.57	7.69	11.72	7.55	9.84	6.69	9.75	9.87	9.16
C19orf12	CDK14	647	1000	630	870	819	0.517	9.31	9.57	10.40	11.72	11.19	9.84	8.92	9.75	11.32	9.16
C6orf136	CDK14	330	953	720	613	674	0.652	9.40	9.57	10.68	11.72	9.74	9.84	8.54	9.75	10.53	9.16
CALM3	CDK14	689	998	905	832	691	0.438	13.18	9.57	16.54	11.72	12.50	9.84	12.75	9.75	12.99	9.16
CCDC6	CDK14	779	974	789	827	862	0.320	10.12	9.57	11.23	11.72	10.15	9.84	11.17	9.75	11.20	9.16
CBX6	CDK16	701	1000	786	964	777	0.386	11.57	11.63	13.94	13.02	9.70	11.03	11.69	11.75	10.34	12.96
ACAD8	CDK17	871	960	869	184	706	0.447	10.39	9.99	10.44	10.71	11.15	9.68	10.21	11.00	10.97	9.78
ACADSB	CDK17	986	952	202	34	98	0.678	8.48	9.99	10.49	10.71	14.23	9.68	9.76	11.00	11.81	9.78
ACP1	CDK17	761	986	906	526	904	0.423	10.60	9.99	11.17	10.71	11.47	9.68	10.94	11.00	11.32	9.78
AKTIP	CDK17	603	961	576	251	603	0.781	10.10	9.99	11.35	10.71	9.95	9.68	9.76	11.00	11.55	9.78
ATRN	CDK17	807	960	544	199	944	0.522	9.75	9.99	11.74	10.71	12.25	9.68	10.87	11.00	10.97	9.78
ATXN10	CDK17	839	962	802	495	934	0.387	10.75	9.99	12.39	10.71	11.53	9.68	11.48	11.00	11.84	9.78
C11orf73	CDK17	611	998	869	264	784	0.614	9.65	9.99	9.54	10.71	9.39	9.68	9.20	11.00	10.43	9.78
C1orf43	CDK17	571	973	754	224	723	0.672	12.12	9.99	12.69	10.71	12.85	9.68	12.53	11.00	13.64	9.78
CDC123	CDK17	102	974	790	70	933	0.587	11.51	9.99	10.35	10.71	10.16	9.68	9.87	11.00	10.37	9.78
ARHGAP21	CDK19	809	981	611	920	862	0.361	9.38	10.50	14.24	10.88	11.04	9.21	12.38	9.32	11.93	9.20
ATP6V1F	CDK20	547	984	866	824	699	0.500	11.65	6.91	12.12	10.02	10.01	7.89	11.09	7.43	11.04	6.58
C15orf61	CDK20	876	910	676	852	449	0.368	7.55	6.91	7.69	10.02	7.55	7.89	6.69	7.43	9.87	6.58
CAMK2B	CDK20	227	991	113	93	383	0.982	5.38	6.91	14.04	10.02	9.15	7.89	3.76	7.43	12.91	6.58
AAK1	CDK5	131	992	740	11	268	0.864	9.20	9.47	12.16	10.95	7.27	8.51	7.95	7.17	9.38	7.89
ABCA3	CDK5	267	991	894	887	796	0.444	8.87	9.47	12.96	10.95	7.45	8.51	13.89	7.17	10.00	7.89
AFG3L2	CDK5	685	975	954	944	744	0.286	9.57	9.47	10.17	10.95	10.61	8.51	9.71	7.17	12.40	7.89
AKAP11	CDK5	404	916	873	691	839	0.381	9.71	9.47	12.22	10.95	10.48	8.51	11.26	7.17	10.48	7.89
ANKH	CDK5	34	970	840	442	414	0.770	10.99	9.47	12.55	10.95	11.70	8.51	10.76	7.17	12.06	7.89
ARHGEF3	CDK5	357	993	530	349	599	0.921	10.98	9.47	10.85	10.95	7.58	8.51	10.63	7.17	9.47	7.89
ARHGEF9	CDK5	371	998	709	848	712	0.612	9.21	9.47	13.15	10.95	8.97	8.51	9.44	7.17	8.78	7.89
ARL3	CDK5	963	938	978	858	892	0.063	9.35	9.47	11.61	10.95	8.63	8.51	9.59	7.17	9.10	7.89
ARL4C	CDK5	24	969	545	231	518	0.906	12.00	9.47	10.94	10.95	8.86	8.51	10.55	7.17	7.25	7.89
ARPC5L	CDK5	558	1000	757	559	920	0.603	10.88	9.47	11.60	10.95	10.90	8.51	10.85	7.17	11.00	7.89
ATP2A2	CDK5	529	985	806	521	120	0.792	11.26	9.47	13.85	10.95	13.40	8.51	13.45	7.17	16.43	7.89
ATP6AP2	CDK5	805	991	958	831	717	0.327	12.10	9.47	12.38	10.95	11.55	8.51	12.27	7.17	10.23	7.89
ATP6V0A1	CDK5	743	1000	861	649	495	0.624	11.61	9.47	13.73	10.95	11.24	8.51	11.48	7.17	12.41	7.89
ATP6V1A	CDK5	832	992	984	982	913	0.129	11.71	9.47	12.61	10.95	11.30	8.51	11.06	7.17	9.74	7.89
ATP6V1B2	CDK5	869	999	976	769	831	0.276	13.91	9.47	13.89	10.95	11.51	8.51	12.98	7.17	12.08	7.89
ATXN10	CDK5	682	977	983	898	925	0.213	10.75	9.47	12.39	10.95	11.53	8.51	11.48	7.17	11.84	7.89
BCAS2	CDK5	547	954	929	802	756	0.391	9.60	9.47	10.38	10.95	9.89	8.51	9.11	7.17	10.37	7.89
BLCAP	CDK5	900	1000	834	919	796	0.276	10.88	9.47	12.78	10.95	12.32	8.51	11.10	7.17	14.05	7.89
BMPR2	CDK5	731	916	716	87	680	0.518	9.83	9.47	11.76	10.95	10.78	8.51	13.09	7.17	11.28	7.89
C19orf12	CDK5	580	995	847	913	611	0.514	9.31	9.47	10.40	10.95	11.19	8.51	8.92	7.17	11.32	7.89
CAND1	CDK5	682	903	968	764	496	0.382	10.66	9.47	11.94	10.95	11.56	8.51	11.81	7.17	10.79	7.89
CAPRIN2	CDK5	256	833	615	652	532	0.516	9.92	9.47	12.03	10.95	10.53	8.51	10.68	7.17	10.31	7.89
CCT2	CDK5	704	936	936	799	525	0.390	10.71	9.47	11.58	10.95	11.20	8.51	11.54	7.17	12.17	7.89
CDK14	CDK5	736	991	724	281	732	0.636	9.57	9.47	11.72	10.95	9.84	8.51	9.75	7.17	9.16	7.89
ABR	CDK7	952	890	852	936	69	0.214	12.54	9.16	15.13	8.46	9.16	8.61	13.01	8.51	10.48	9.74
ARHGEF9	CDK7	510	968	588	889	66	0.693	9.21	9.16	13.15	8.46	8.97	8.61	9.44	8.51	8.78	9.74
ATP6V0C	CDK7	265	879	999	929	829	0.214	14.12	9.16	14.26	8.46	12.30	8.61	12.91	8.51	12.61	9.74
CD99L2	CDK7	986	968	948	939	994	0.025	10.94	9.16	13.69	8.46	12.11	8.61	11.39	8.51	13.52	9.74
ACSL1	CDKN1B	703	823	620	225	240	0.484	16.81	12.36	10.48	11.43	15.79	11.17	14.09	11.52	15.03	11.64
ANKFY1	CDKN1B	958	954	851	645	969	0.206	10.81	12.36	11.16	11.43	10.91	11.17	11.50	11.52	11.08	11.64
CD9	CDKN1B	712	657	721	621	417	0.097	10.34	12.36	10.82	11.43	10.61	11.17	13.33	11.52	10.75	11.64
ADIPOR2	CDKN1C	406	928	204	431	589	0.811	11.66	8.97	11.71	8.57	12.99	7.84	12.53	9.89	11.90	10.60
ALG5	CDKN1C	380	683	204	300	476	0.366	9.21	8.97	7.92	8.57	10.25	7.84	9.13	9.89	8.98	10.60
AMPD3	CDKN1C	47	908	748	13	72	0.692	11.34	8.97	9.32	8.57	7.03	7.84	9.17	9.89	12.10	10.60
C21orf91	CDKN1C	61	898	290	700	474	0.696	9.55	8.97	7.59	8.57	8.42	7.84	8.66	9.89	8.42	10.60
CA2	CDKN1C	186	786	110	357	425	0.572	10.29	8.97	10.88	8.57	12.01	7.84	9.30	9.89	10.45	10.60
CAPN3	CDKN1C	328	964	370	639	19	0.859	10.90	8.97	10.87	8.57	11.03	7.84	10.84	9.89	14.61	10.60
ABCE1	CDS2	597	927	883	649	921	0.329	9.41	12.22	9.86	12.59	10.65	10.96	10.36	11.73	11.08	10.78
AK6	CDS2	101	108	96	50	47	0.000	0.00	12.22	0.00	12.59	0.00	10.96	0.00	11.73	0.00	10.78
AKIRIN1	CDS2	976	952	854	929	923	0.075	11.35	12.22	11.27	12.59	11.23	10.96	10.82	11.73	10.81	10.78
ALDOA	CDS2	521	964	899	762	289	0.587	16.43	12.22	16.81	12.59	13.08	10.96	14.97	11.73	17.22	10.78
APEX1	CDS2	469	991	981	715	952	0.408	11.34	12.22	11.28	12.59	11.78	10.96	11.57	11.73	11.78	10.78
APOA1BP	CDS2	339	910	962	776	859	0.297	10.28	12.22	10.83	12.59	11.06	10.96	10.15	11.73	10.64	10.78
APOO	CDS2	617	974	935	574	393	0.635	8.02	12.22	9.77	12.59	8.10	10.96	6.73	11.73	9.50	10.78
ARL1	CDS2	684	990	903	858	884	0.316	9.11	12.22	11.04	12.59	11.31	10.96	10.95	11.73	11.27	10.78
ARMCX3	CDS2	477	991	869	928	812	0.427	10.37	12.22	11.74	12.59	10.85	10.96	11.43	11.73	10.96	10.78
ATIC	CDS2	184	938	957	600	935	0.390	10.39	12.22	10.72	12.59	10.81	10.96	10.26	11.73	11.27	10.78
ATP5J	CDS2	751	937	973	853	537	0.335	9.74	12.22	11.36	12.59	11.91	10.96	10.12	11.73	12.56	10.78
ATP5O	CDS2	667	971	978	864	465	0.441	11.11	12.22	12.41	12.59	12.08	10.96	11.48	11.73	13.30	10.78
BCAS2	CDS2	563	952	934	668	811	0.416	9.60	12.22	10.38	12.59	9.89	10.96	9.11	11.73	10.37	10.78
BNIP3	CDS2	373	955	970	886	725	0.377	9.50	12.22	11.44	12.59	12.07	10.96	9.81	11.73	12.63	10.78
C14orf2	CDS2	826	966	977	800	579	0.346	10.51	12.22	12.11	12.59	11.13	10.96	10.10	11.73	11.87	10.78
C1orf52	CDS2	946	986	718	920	976	0.192	9.51	12.22	10.08	12.59	9.18	10.96	9.27	11.73	9.49	10.78
CAND1	CDS2	726	1000	987	968	972	0.173	10.66	12.22	11.94	12.59	11.56	10.96	11.81	11.73	10.79	10.78
AAK1	CEND1	255	950	567	184	191	0.867	9.20	4.79	12.16	13.85	7.27	3.53	7.95	2.48	9.38	3.58
BTBD2	CEND1	442	965	650	461	300	0.855	11.47	4.79	13.61	13.85	11.46	3.53	11.17	2.48	11.96	3.58
C19orf60	CEND1	393	902	368	397	315	0.804	10.29	4.79	10.61	13.85	10.36	3.53	9.48	2.48	10.67	3.58
ATP8B1	CEP164	640	458	49	610	382	0.000	5.63	10.39	6.48	10.52	9.75	10.55	10.12	10.37	8.07	9.08
ABHD6	CEP170	728	962	292	615	463	0.752	8.61	10.43	9.93	10.54	11.20	9.09	8.06	10.70	8.20	10.31
AUH	CEP170	960	982	694	951	782	0.271	8.85	10.43	9.37	10.54	9.70	9.09	8.57	10.70	9.66	10.31
C12orf76	CEP170	869	925	646	806	696	0.342	9.62	10.43	11.41	10.54	8.82	9.09	8.81	10.70	8.41	10.31
C16orf80	CEP170	712	944	710	709	842	0.402	9.28	10.43	10.04	10.54	9.73	9.09	8.98	10.70	8.51	10.31
CCT2	CEP170	763	975	847	780	358	0.505	10.71	10.43	11.58	10.54	11.20	9.09	11.54	10.70	12.17	10.31
ACAD8	CEP68	946	979	915	498	714	0.420	10.39	10.17	10.44	10.65	11.15	8.45	10.21	9.84	10.97	11.68
ACP1	CEP68	536	1000	916	677	850	0.510	10.60	10.17	11.17	10.65	11.47	8.45	10.94	9.84	11.32	11.68
ACTR10	CEP68	686	1000	916	496	806	0.546	10.67	10.17	11.18	10.65	10.08	8.45	10.38	9.84	10.76	11.68
AFG3L2	CEP68	826	1000	543	311	781	0.675	9.57	10.17	10.17	10.65	10.61	8.45	9.71	9.84	12.40	11.68
ALAS1	CEP68	547	981	330	325	123	0.939	11.62	10.17	10.59	10.65	13.01	8.45	11.01	9.84	11.83	11.68
ALDOA	CEP68	547	926	655	288	229	0.751	16.43	10.17	16.81	10.65	13.08	8.45	14.97	9.84	17.22	11.68
AP2A2	CEP68	843	980	929	712	821	0.307	11.52	10.17	12.91	10.65	12.19	8.45	12.23	9.84	11.17	11.68
AP2M1	CEP68	594	993	915	728	778	0.478	13.46	10.17	14.96	10.65	12.91	8.45	13.65	9.84	12.83	11.68
AP2S1	CEP68	340	915	881	162	580	0.600	11.67	10.17	11.54	10.65	11.29	8.45	10.76	9.84	10.67	11.68
APLP2	CEP68	745	984	786	645	876	0.442	14.29	10.17	14.14	10.65	14.20	8.45	15.53	9.84	12.35	11.68
AREL1	CEP68	847	1000	723	532	640	0.629	11.86	10.17	10.89	10.65	10.35	8.45	10.68	9.84	10.60	11.68
ARL8B	CEP68	849	994	803	456	585	0.620	11.52	10.17	12.09	10.65	11.22	8.45	11.90	9.84	12.57	11.68
ASNA1	CEP68	524	966	786	248	640	0.707	11.29	10.17	11.23	10.65	10.27	8.45	10.37	9.84	10.86	11.68
ATP5A1	CEP68	835	998	672	409	253	0.743	12.98	10.17	14.59	10.65	14.03	8.45	13.65	9.84	15.13	11.68
ATP5B	CEP68	790	1000	688	372	289	0.761	13.74	10.17	14.91	10.65	14.35	8.45	14.31	9.84	15.46	11.68
ATP5G3	CEP68	757	992	771	298	87	0.720	11.42	10.17	12.34	10.65	13.03	8.45	11.62	9.84	13.28	11.68
ATP5H	CEP68	646	935	820	374	536	0.619	10.99	10.17	11.77	10.65	11.93	8.45	11.03	9.84	12.93	11.68
ATP6AP1	CEP68	841	977	898	434	766	0.452	13.29	10.17	13.19	10.65	11.67	8.45	13.09	9.84	11.37	11.68
ATP6AP2	CEP68	931	998	778	751	863	0.335	12.10	10.17	12.38	10.65	11.55	8.45	12.27	9.84	10.23	11.68
ATP6V0B	CEP68	610	941	698	320	602	0.677	13.65	10.17	12.20	10.65	12.06	8.45	12.02	9.84	11.51	11.68
ATP6V0C	CEP68	425	816	711	301	513	0.520	14.12	10.17	14.26	10.65	12.30	8.45	12.91	9.84	12.61	11.68
ATP6V1A	CEP68	759	1000	710	263	715	0.658	11.71	10.17	12.61	10.65	11.30	8.45	11.06	9.84	9.74	11.68
ATP6V1H	CEP68	838	993	843	462	830	0.480	10.60	10.17	12.47	10.65	9.57	8.45	10.43	9.84	10.79	11.68
BECN1	CEP68	878	997	584	588	812	0.563	11.06	10.17	9.93	10.65	9.52	8.45	10.02	9.84	11.41	11.68
BLOC1S2	CEP68	789	983	743	458	622	0.639	10.40	10.17	10.85	10.65	10.01	8.45	9.82	9.84	10.83	11.68
BRK1	CEP68	661	990	868	779	819	0.416	12.29	10.17	12.18	10.65	11.66	8.45	12.26	9.84	12.04	11.68
BTBD1	CEP68	913	996	606	801	805	0.429	10.44	10.17	11.99	10.65	10.71	8.45	10.91	9.84	13.94	11.68
BTBD10	CEP68	630	998	907	397	830	0.562	10.02	10.17	10.90	10.65	8.60	8.45	9.21	9.84	9.69	11.68
BTF3L4	CEP68	820	1000	793	510	950	0.464	9.93	10.17	10.37	10.65	9.80	8.45	9.78	9.84	11.22	11.68
C10orf32	CEP68	843	912	745	848	747	0.233	8.99	10.17	9.75	10.65	11.17	8.45	9.58	9.84	10.22	11.68
C1D	CEP68	718	979	806	672	698	0.511	9.22	10.17	8.54	10.65	9.39	8.45	8.42	9.84	9.64	11.68
C2orf69	CEP68	870	951	780	790	699	0.333	8.78	10.17	9.36	10.65	8.79	8.45	8.35	9.84	9.75	11.68
C5orf22	CEP68	871	999	720	454	786	0.559	9.39	10.17	8.78	10.65	9.23	8.45	8.73	9.84	10.48	11.68
CALM3	CEP68	770	942	881	713	588	0.408	13.18	10.17	16.54	10.65	12.50	8.45	12.75	9.84	12.99	11.68
CCNC	CEP68	831	1000	566	623	911	0.534	9.19	10.17	9.80	10.65	11.46	8.45	10.03	9.84	9.67	11.68
CCNH	CEP68	907	964	497	699	622	0.564	10.62	10.17	9.71	10.65	9.93	8.45	9.89	9.84	10.11	11.68
CCSAP	CEP68	846	1000	901	887	661	0.352	9.70	10.17	11.41	10.65	7.88	8.45	8.33	9.84	7.83	11.68
CDC123	CEP68	517	997	728	289	819	0.712	11.51	10.17	10.35	10.65	10.16	8.45	9.87	9.84	10.37	11.68
CDC42SE2	CEP68	963	983	912	852	679	0.263	12.14	10.17	11.39	10.65	10.23	8.45	10.88	9.84	10.12	11.68
ASB13	CERK	787	970	510	594	917	0.536	8.71	12.18	10.08	11.53	11.70	10.91	8.70	11.07	9.80	11.09
ATP5G3	CERK	873	962	596	664	47	0.608	11.42	12.18	12.34	11.53	13.03	10.91	11.62	11.07	13.28	11.09
ATP5L	CERK	783	945	585	817	327	0.547	11.23	12.18	11.58	11.53	11.61	10.91	11.14	11.07	12.13	11.09
ATP6V1A	CERK	869	962	584	611	757	0.513	11.71	12.18	12.61	11.53	11.30	10.91	11.06	11.07	9.74	11.09
ATP6V1B2	CERK	780	946	837	801	897	0.234	13.91	12.18	13.89	11.53	11.51	10.91	12.98	11.07	12.08	11.09
ATP6V1C1	CERK	684	958	823	796	943	0.293	11.80	12.18	12.62	11.53	10.85	10.91	11.04	11.07	10.35	11.09
BABAM1	CERK	519	959	679	827	709	0.551	11.65	12.18	11.68	11.53	10.88	10.91	10.58	11.07	11.69	11.09
CAMK2G	CERK	953	898	444	736	146	0.479	12.20	12.18	13.75	11.53	10.30	10.91	11.04	11.07	12.36	11.09
CAMTA1	CERK	814	991	544	879	508	0.610	9.34	12.18	12.02	11.53	9.92	10.91	9.84	11.07	10.44	11.09
ARMCX6	CERS2	658	609	806	740	517	0.046	10.06	11.73	8.80	10.11	8.88	13.35	9.48	12.00	8.50	9.89
AAK1	CERS6	906	999	943	471	804	0.421	9.20	8.93	12.16	8.90	7.27	8.69	7.95	8.71	9.38	9.18
ABHD14A	CERS6	670	851	566	558	52	0.555	8.84	8.93	10.56	8.90	8.95	8.69	7.80	8.71	9.20	9.18
ACVR2A	CERS6	888	984	794	665	675	0.457	7.85	8.93	8.40	8.90	8.92	8.69	8.82	8.71	9.23	9.18
ALAS1	CERS6	711	969	761	446	262	0.702	11.62	8.93	10.59	8.90	13.01	8.69	11.01	8.71	11.83	9.18
ANKH	CERS6	501	997	729	787	33	0.736	10.99	8.93	12.55	8.90	11.70	8.69	10.76	8.71	12.06	9.18
ANXA6	CERS6	784	968	917	834	202	0.418	13.34	8.93	13.41	8.90	13.42	8.69	13.49	8.71	13.33	9.18
AP2A2	CERS6	841	963	889	875	810	0.218	11.52	8.93	12.91	8.90	12.19	8.69	12.23	8.71	11.17	9.18
AP2S1	CERS6	396	893	871	448	373	0.601	11.67	8.93	11.54	8.90	11.29	8.69	10.76	8.71	10.67	9.18
AP3M2	CERS6	849	993	646	580	379	0.699	9.51	8.93	11.41	8.90	8.40	8.69	10.06	8.71	9.31	9.18
ARF1	CERS6	690	975	942	752	791	0.362	14.33	8.93	14.00	8.90	13.87	8.69	14.52	8.71	13.66	9.18
ARL3	CERS6	247	941	947	813	598	0.456	9.35	8.93	11.61	8.90	8.63	8.69	9.59	8.71	9.10	9.18
ARL4C	CERS6	757	979	562	276	380	0.798	12.00	8.93	10.94	8.90	8.86	8.69	10.55	8.71	7.25	9.18
ARPC5L	CERS6	895	979	744	360	590	0.594	10.88	8.93	11.60	8.90	10.90	8.69	10.85	8.71	11.00	9.18
ATP2A2	CERS6	961	1000	921	767	69	0.425	11.26	8.93	13.85	8.90	13.40	8.69	13.45	8.71	16.43	9.18
ATP5O	CERS6	619	927	889	771	204	0.465	11.11	8.93	12.41	8.90	12.08	8.69	11.48	8.71	13.30	9.18
ATP6V0C	CERS6	284	836	970	622	425	0.443	14.12	8.93	14.26	8.90	12.30	8.69	12.91	8.71	12.61	9.18
ATP6V0D1	CERS6	167	944	939	619	553	0.583	13.64	8.93	12.71	8.90	11.55	8.69	12.10	8.71	12.12	9.18
ATP6V1F	CERS6	595	872	974	639	428	0.441	11.65	8.93	12.12	8.90	10.01	8.69	11.09	8.71	11.04	9.18
BABAM1	CERS6	533	942	923	748	389	0.532	11.65	8.93	11.68	8.90	10.88	8.69	10.58	8.71	11.69	9.18
BRK1	CERS6	540	968	977	788	561	0.507	12.29	8.93	12.18	8.90	11.66	8.69	12.26	8.71	12.04	9.18
C11orf31	CERS6	727	840	687	530	473	0.458	10.44	8.93	11.01	8.90	11.48	8.69	10.56	8.71	10.69	9.18
C12orf10	CERS6	623	927	930	699	600	0.429	10.36	8.93	10.40	8.90	9.37	8.69	9.09	8.71	10.05	9.18
C14orf2	CERS6	444	929	812	656	222	0.624	10.51	8.93	12.11	8.90	11.13	8.69	10.10	8.71	11.87	9.18
C15orf61	CERS6	825	914	605	784	35	0.471	7.55	8.93	7.69	8.90	7.55	8.69	6.69	8.71	9.87	9.18
C1orf21	CERS6	749	968	683	880	698	0.431	9.70	8.93	12.35	8.90	10.82	8.69	11.47	8.71	13.62	9.18
C6orf136	CERS6	805	930	306	704	301	0.606	9.40	8.93	10.68	8.90	9.74	8.69	8.54	8.71	10.53	9.18
CCDC28A	CERS6	461	982	514	790	606	0.759	10.97	8.93	10.03	8.90	10.08	8.69	9.04	8.71	8.93	9.18
CELF2	CERS6	488	999	752	885	893	0.483	13.59	8.93	12.90	8.90	8.49	8.69	12.77	8.71	11.43	9.18
ANKRD10	CETN3	769	725	724	243	155	0.226	11.48	5.83	11.54	7.88	12.09	7.96	12.48	7.35	12.90	8.01
ARRDC4	CETN3	570	772	189	38	239	0.509	9.70	5.83	9.42	7.88	10.02	7.96	10.54	7.35	10.32	8.01
C20orf194	CETN3	634	681	915	895	307	0.114	9.07	5.83	11.98	7.88	8.78	7.96	10.84	7.35	11.80	8.01
CBFB	CETN3	792	910	811	721	44	0.408	10.80	5.83	8.82	7.88	9.91	7.96	10.50	7.35	11.15	8.01
ALG5	CFL2	727	886	936	771	279	0.330	9.21	7.83	7.92	11.08	10.25	11.89	9.13	10.71	8.98	14.42
ATOX1	CFL2	484	694	742	614	292	0.234	10.15	7.83	9.86	11.08	11.07	11.89	9.45	10.71	8.97	14.42
ATP11A	CFL2	438	949	869	682	569	0.588	11.64	7.83	10.03	11.08	10.95	11.89	12.72	10.71	10.74	14.42
BNIP3L	CFL2	354	832	803	885	51	0.346	12.91	7.83	11.99	11.08	10.64	11.89	12.19	10.71	11.02	14.42
C1orf122	CFL2	390	681	420	604	534	0.293	10.16	7.83	11.22	11.08	10.61	11.89	9.26	10.71	10.04	14.42
CAPZA1	CFL2	478	871	940	772	71	0.420	13.33	7.83	10.67	11.08	11.79	11.89	12.42	10.71	10.85	14.42
CCP110	CFL2	700	996	789	798	487	0.599	9.50	7.83	10.63	11.08	8.53	11.89	9.59	10.71	9.45	14.42
AP3M2	CHCHD1	164	938	929	730	870	0.361	9.51	9.80	11.41	9.04	8.40	9.89	10.06	8.70	9.31	9.91
ATP6AP2	CHCHD1	828	947	982	933	801	0.140	12.10	9.80	12.38	9.04	11.55	9.89	12.27	8.70	10.23	9.91
C16orf45	CHCHD1	605	946	257	437	621	0.779	8.03	9.80	13.31	9.04	9.72	9.89	9.12	8.70	11.79	9.91
ACADSB	CHCHD2	679	847	38	681	616	0.456	8.48	12.29	10.49	12.79	14.23	12.51	9.76	12.35	11.81	13.49
AKAP11	CHCHD2	692	850	880	700	634	0.262	9.71	12.29	12.22	12.79	10.48	12.51	11.26	12.35	10.48	13.49
AKAP9	CHCHD2	528	574	484	529	611	0.083	10.40	12.29	11.00	12.79	12.22	12.51	11.83	12.35	12.01	13.49
AKTIP	CHCHD2	781	929	923	886	929	0.099	10.10	12.29	11.35	12.79	9.95	12.51	9.76	12.35	11.55	13.49
ARFGEF2	CHCHD2	564	830	957	875	733	0.181	9.76	12.29	10.80	12.79	11.48	12.51	11.11	12.35	11.32	13.49
ATP6AP2	CHCHD2	840	953	995	988	870	0.098	12.10	12.29	12.38	12.79	11.55	12.51	12.27	12.35	10.23	13.49
ATP6V1A	CHCHD2	719	871	984	911	798	0.113	11.71	12.29	12.61	12.79	11.30	12.51	11.06	12.35	9.74	13.49
ATP6V1B2	CHCHD2	693	865	991	925	933	0.086	13.91	12.29	13.89	12.79	11.51	12.51	12.98	12.35	12.08	13.49
ATRN	CHCHD2	658	862	881	911	898	0.102	9.75	12.29	11.74	12.79	12.25	12.51	10.87	12.35	10.97	13.49
BNIP3L	CHCHD2	470	886	938	750	560	0.424	12.91	12.29	11.99	12.79	10.64	12.51	12.19	12.35	11.02	13.49
CAND1	CHCHD2	845	841	983	949	836	0.003	10.66	12.29	11.94	12.79	11.56	12.51	11.81	12.35	10.79	13.49
CCSER2	CHCHD2	425	849	905	778	788	0.240	10.75	12.29	11.41	12.79	10.15	12.51	11.24	12.35	12.40	13.49
CDC37L1	CHCHD2	851	895	734	844	533	0.309	8.51	12.29	9.86	12.79	11.36	12.51	9.42	12.35	12.03	13.49
CDS2	CHCHD2	767	886	977	843	827	0.111	12.22	12.29	12.59	12.79	10.96	12.51	11.73	12.35	10.78	13.49
CEP68	CHCHD2	716	875	723	508	682	0.435	10.17	12.29	10.65	12.79	8.45	12.51	9.84	12.35	11.68	13.49
ARIH1	CHCHD3	900	998	982	923	854	0.167	11.38	10.55	10.78	9.63	10.92	9.87	11.48	10.29	12.18	12.78
CCSER2	CHCHD3	962	994	902	910	981	0.111	10.75	10.55	11.41	9.63	10.15	9.87	11.24	10.29	12.40	12.78
CDC37L1	CHCHD3	669	996	589	860	539	0.663	8.51	10.55	9.86	9.63	11.36	9.87	9.42	10.29	12.03	12.78
ACTR1A	CHCHD6	223	991	779	890	836	0.479	12.69	7.24	13.19	9.91	11.53	7.37	12.55	7.55	13.28	7.08
AP1M1	CHCHD6	372	989	837	953	909	0.379	12.05	7.24	11.47	9.91	12.13	7.37	10.98	7.55	11.02	7.08
AP2B1	CHCHD6	597	973	851	873	948	0.311	12.77	7.24	14.15	9.91	11.74	7.37	13.34	7.55	12.61	7.08
APLP2	CHCHD6	139	896	890	891	872	0.215	14.29	7.24	14.14	9.91	14.20	7.37	15.53	7.55	12.35	7.08
ARF1	CHCHD6	416	992	773	870	894	0.466	14.33	7.24	14.00	9.91	13.87	7.37	14.52	7.55	13.66	7.08
ARFIP2	CHCHD6	926	978	619	899	787	0.341	10.53	7.24	10.86	9.91	11.02	7.37	10.59	7.55	9.79	7.08
ATP1A1	CHCHD6	812	973	480	639	47	0.721	12.75	7.24	14.66	9.91	12.79	7.37	15.05	7.55	12.75	7.08
ATP6AP1	CHCHD6	336	993	847	857	978	0.395	13.29	7.24	13.19	9.91	11.67	7.37	13.09	7.55	11.37	7.08
ATP6V0C	CHCHD6	294	995	840	861	872	0.454	14.12	7.24	14.26	9.91	12.30	7.37	12.91	7.55	12.61	7.08
ATP6V0D1	CHCHD6	50	1000	811	823	961	0.453	13.64	7.24	12.71	9.91	11.55	7.37	12.10	7.55	12.12	7.08
ATP6V1B2	CHCHD6	29	996	880	687	847	0.535	13.91	7.24	13.89	9.91	11.51	7.37	12.98	7.55	12.08	7.08
BMPR2	CHCHD6	404	861	737	422	754	0.476	9.83	7.24	11.76	9.91	10.78	7.37	13.09	7.55	11.28	7.08
BRE	CHCHD6	494	992	732	884	796	0.528	10.98	7.24	10.03	9.91	9.69	7.37	9.61	7.55	11.05	7.08
CD99L2	CHCHD6	68	997	622	926	654	0.643	10.94	7.24	13.69	9.91	12.11	7.37	11.39	7.55	13.52	7.08
ATP6AP2	CHCHD7	975	974	961	952	750	0.130	12.10	9.91	12.38	9.85	11.55	9.30	12.27	9.64	10.23	9.85
BASP1	CHD3	125	993	812	413	920	0.620	14.45	12.83	14.01	13.71	8.06	9.97	10.34	13.05	6.68	10.13
C2CD2L	CHD3	972	980	722	956	594	0.338	10.87	12.83	11.70	13.71	9.89	9.97	9.83	13.05	10.13	10.13
CELF3	CHD3	57	980	96	405	417	0.960	5.10	12.83	12.69	13.71	1.91	9.97	1.94	13.05	2.99	10.13
AAK1	CHM	716	1000	893	422	890	0.500	9.20	8.75	12.16	9.65	7.27	8.98	7.95	9.23	9.38	10.03
ACOT7	CHM	165	943	810	883	677	0.451	8.95	8.75	12.56	9.65	9.34	8.98	9.09	9.23	7.77	10.03
ACVR1B	CHM	762	995	888	642	846	0.421	11.17	8.75	11.45	9.65	11.66	8.98	10.74	9.23	10.45	10.03
ALAS1	CHM	382	933	666	702	628	0.618	11.62	8.75	10.59	9.65	13.01	8.98	11.01	9.23	11.83	10.03
ANAPC1	CHM	801	992	999	996	935	0.124	9.84	8.75	9.97	9.65	9.78	8.98	9.80	9.23	10.50	10.03
ANKH	CHM	188	999	916	876	261	0.602	10.99	8.75	12.55	9.65	11.70	8.98	10.76	9.23	12.06	10.03
ANXA6	CHM	457	961	904	907	431	0.516	13.34	8.75	13.41	9.65	13.42	8.98	13.49	9.23	13.33	10.03
AP2M1	CHM	385	981	995	965	923	0.278	13.46	8.75	14.96	9.65	12.91	8.98	13.65	9.23	12.83	10.03
AP2S1	CHM	319	891	949	751	709	0.356	11.67	8.75	11.54	9.65	11.29	8.98	10.76	9.23	10.67	10.03
ARPC5L	CHM	775	974	871	637	843	0.385	10.88	8.75	11.60	9.65	10.90	8.98	10.85	9.23	11.00	10.03
ATP1A1	CHM	609	973	941	742	563	0.518	12.75	8.75	14.66	9.65	12.79	8.98	15.05	9.23	12.75	10.03
ATP2A2	CHM	945	1000	951	811	423	0.397	11.26	8.75	13.85	9.65	13.40	8.98	13.45	9.23	16.43	10.03
ATP5B	CHM	696	987	962	961	554	0.388	13.74	8.75	14.91	9.65	14.35	8.98	14.31	9.23	15.46	10.03
ATP5G3	CHM	819	977	941	938	348	0.355	11.42	8.75	12.34	9.65	13.03	8.98	11.62	9.23	13.28	10.03
ATP6V0C	CHM	78	801	975	760	757	0.193	14.12	8.75	14.26	9.65	12.30	8.98	12.91	9.23	12.61	10.03
B4GALT5	CHM	695	992	927	571	826	0.474	12.86	8.75	10.64	9.65	11.05	8.98	11.83	9.23	12.62	10.03
BABAM1	CHM	372	956	985	958	816	0.298	11.65	8.75	11.68	9.65	10.88	8.98	10.58	9.23	11.69	10.03
C14orf2	CHM	730	952	915	913	561	0.344	10.51	8.75	12.11	9.65	11.13	8.98	10.10	9.23	11.87	10.03
C12orf76	CHMP2B	961	905	355	890	730	0.297	9.62	10.83	11.41	9.81	8.82	10.42	8.81	10.30	8.41	10.84
AARS	CHMP4B	458	988	958	652	974	0.434	10.69	12.77	13.64	12.67	12.72	11.26	12.45	12.32	12.26	12.89
AASDHPPT	CHMP4B	730	971	783	635	820	0.458	9.13	12.77	10.72	12.67	10.05	11.26	8.97	12.32	10.52	12.89
ACAT2	CHMP4B	805	975	702	613	635	0.573	9.24	12.77	9.59	12.67	11.06	11.26	9.07	12.32	7.47	12.89
ACOT7	CHMP4B	348	977	774	755	888	0.495	8.95	12.77	12.56	12.67	9.34	11.26	9.09	12.32	7.77	12.89
ACTR1B	CHMP4B	824	981	965	857	872	0.203	10.95	12.77	12.75	12.67	11.65	11.26	11.43	12.32	11.85	12.89
ACYP2	CHMP4B	803	985	734	814	832	0.379	8.11	12.77	10.27	12.67	8.97	11.26	7.23	12.32	11.38	12.89
ADSL	CHMP4B	834	982	1000	580	904	0.314	10.59	12.77	9.07	12.67	10.19	11.26	9.86	12.32	12.92	12.89
AFG3L2	CHMP4B	749	994	987	781	972	0.243	9.57	12.77	10.17	12.67	10.61	11.26	9.71	12.32	12.40	12.89
AGGF1	CHMP4B	692	982	970	565	941	0.380	9.68	12.77	10.40	12.67	9.83	11.26	9.49	12.32	10.24	12.89
AK6	CHMP4B	101	108	96	50	47	0.000	0.00	12.77	0.00	12.67	0.00	11.26	0.00	12.32	0.00	12.89
AKTIP	CHMP4B	784	991	846	672	792	0.435	10.10	12.77	11.35	12.67	9.95	11.26	9.76	12.32	11.55	12.89
AMN1	CHMP4B	624	998	968	837	972	0.295	8.84	12.77	8.55	12.67	5.90	11.26	6.21	12.32	8.60	12.89
ANAPC13	CHMP4B	821	988	983	767	949	0.216	10.46	12.77	10.62	12.67	10.51	11.26	10.28	12.32	11.10	12.89
ANKMY2	CHMP4B	688	990	458	684	191	0.794	8.70	12.77	10.40	12.67	9.01	11.26	8.93	12.32	9.78	12.89
ANKRD46	CHMP4B	549	981	102	516	573	0.893	7.77	12.77	10.73	12.67	10.25	11.26	8.45	12.32	10.73	12.89
AP2A2	CHMP4B	899	956	941	758	958	0.135	11.52	12.77	12.91	12.67	12.19	11.26	12.23	12.32	11.17	12.89
AP3M2	CHMP4B	514	983	777	747	524	0.685	9.51	12.77	11.41	12.67	8.40	11.26	10.06	12.32	9.31	12.89
AP5M1	CHMP4B	682	932	942	687	849	0.289	9.81	12.77	9.09	12.67	9.79	11.26	9.05	12.32	10.10	12.89
APEX1	CHMP4B	788	985	975	720	995	0.236	11.34	12.77	11.28	12.67	11.78	11.26	11.57	12.32	11.78	12.89
APOO	CHMP4B	807	998	982	710	501	0.496	8.02	12.77	9.77	12.67	8.10	11.26	6.73	12.32	9.50	12.89
ARHGEF7	CHMP4B	801	921	801	834	919	0.165	11.16	12.77	12.80	12.67	11.77	11.26	12.22	12.32	12.19	12.89
ARHGEF9	CHMP4B	615	986	232	538	310	0.895	9.21	12.77	13.15	12.67	8.97	11.26	9.44	12.32	8.78	12.89
ATP5A1	CHMP4B	897	998	976	820	508	0.396	12.98	12.77	14.59	12.67	14.03	11.26	13.65	12.32	15.13	12.89
ATP5B	CHMP4B	955	998	995	934	565	0.272	13.74	12.77	14.91	12.67	14.35	11.26	14.31	12.32	15.46	12.89
ATP5C1	CHMP4B	766	1000	979	869	761	0.312	11.21	12.77	11.93	12.67	12.64	11.26	11.58	12.32	13.26	12.89
ATP5G3	CHMP4B	908	1000	984	883	428	0.362	11.42	12.77	12.34	12.67	13.03	11.26	11.62	12.32	13.28	12.89
ATP5H	CHMP4B	919	999	990	865	863	0.179	10.99	12.77	11.77	12.67	11.93	11.26	11.03	12.32	12.93	12.89
ATP5J	CHMP4B	748	999	953	869	780	0.323	9.74	12.77	11.36	12.67	11.91	11.26	10.12	12.32	12.56	12.89
ATP5L	CHMP4B	818	998	994	933	792	0.228	11.23	12.77	11.58	12.67	11.61	11.26	11.14	12.32	12.13	12.89
ATP5O	CHMP4B	828	1000	988	857	638	0.344	11.11	12.77	12.41	12.67	12.08	11.26	11.48	12.32	13.30	12.89
ATPAF1	CHMP4B	832	959	845	602	531	0.513	9.86	12.77	12.33	12.67	11.43	11.26	9.78	12.32	12.53	12.89
BABAM1	CHMP4B	702	999	985	850	942	0.259	11.65	12.77	11.68	12.67	10.88	11.26	10.58	12.32	11.69	12.89
BASP1	CHMP4B	804	995	960	757	434	0.479	14.45	12.77	14.01	12.67	8.06	11.26	10.34	12.32	6.68	12.89
BTRC	CHMP4B	732	983	676	638	888	0.499	9.28	12.77	11.65	12.67	9.91	11.26	9.24	12.32	10.51	12.89
C10orf32	CHMP4B	701	922	456	898	938	0.334	8.99	12.77	9.75	12.67	11.17	11.26	9.58	12.32	10.22	12.89
C11orf31	CHMP4B	778	992	922	942	957	0.184	10.44	12.77	11.01	12.67	11.48	11.26	10.56	12.32	10.69	12.89
C12orf10	CHMP4B	867	998	999	807	959	0.180	10.36	12.77	10.40	12.67	9.37	11.26	9.09	12.32	10.05	12.89
C14orf2	CHMP4B	707	1000	967	855	792	0.340	10.51	12.77	12.11	12.67	11.13	11.26	10.10	12.32	11.87	12.89
C15orf61	CHMP4B	618	962	681	820	654	0.537	7.55	12.77	7.69	12.67	7.55	11.26	6.69	12.32	9.87	12.89
C16orf45	CHMP4B	540	993	41	686	965	0.640	8.03	12.77	13.31	12.67	9.72	11.26	9.12	12.32	11.79	12.89
C16orf80	CHMP4B	824	997	634	660	535	0.667	9.28	12.77	10.04	12.67	9.73	11.26	8.98	12.32	8.51	12.89
C19orf70	CHMP4B	763	976	957	742	925	0.259	9.70	12.77	10.56	12.67	10.35	11.26	9.50	12.32	11.25	12.89
C1D	CHMP4B	714	979	879	853	917	0.277	9.22	12.77	8.54	12.67	9.39	11.26	8.42	12.32	9.64	12.89
C1QBP	CHMP4B	749	1000	997	765	966	0.262	10.41	12.77	10.78	12.67	11.31	11.26	10.25	12.32	11.65	12.89
C6orf136	CHMP4B	788	983	764	717	750	0.457	9.40	12.77	10.68	12.67	9.74	11.26	8.54	12.32	10.53	12.89
CAND1	CHMP4B	665	959	971	906	773	0.267	10.66	12.77	11.94	12.67	11.56	11.26	11.81	12.32	10.79	12.89
CCDC115	CHMP4B	876	996	662	606	845	0.497	10.40	12.77	10.47	12.67	9.37	11.26	9.70	12.32	9.05	12.89
CCT7	CHMP4B	811	994	998	844	982	0.172	11.96	12.77	12.27	12.67	11.95	11.26	12.36	12.32	13.25	12.89
CCT8	CHMP4B	797	980	1000	918	957	0.134	11.62	12.77	11.73	12.67	11.86	11.26	12.18	12.32	12.54	12.89
ALDOA	CHMP5	220	932	914	821	166	0.496	16.43	10.44	16.81	11.26	13.08	10.73	14.97	11.14	17.22	10.63
AP2S1	CHMP5	512	925	977	781	984	0.279	11.67	10.44	11.54	11.26	11.29	10.73	10.76	11.14	10.67	10.63
AP3M2	CHMP5	100	984	939	909	928	0.330	9.51	10.44	11.41	11.26	8.40	10.73	10.06	11.14	9.31	10.63
ATP5B	CHMP5	634	986	971	919	389	0.460	13.74	10.44	14.91	11.26	14.35	10.73	14.31	11.14	15.46	10.63
ATP6AP1	CHMP5	501	930	996	894	994	0.233	13.29	10.44	13.19	11.26	11.67	10.73	13.09	11.14	11.37	10.63
ATP6V0C	CHMP5	138	828	982	854	929	0.164	14.12	10.44	14.26	11.26	12.30	10.73	12.91	11.14	12.61	10.63
ATXN7L3B	CHMP5	821	991	982	991	957	0.106	10.98	10.44	12.49	11.26	11.43	10.73	11.23	11.14	11.45	10.63
CD99L2	CHMP5	833	945	939	974	918	0.072	10.94	10.44	13.69	11.26	12.11	10.73	11.39	11.14	13.52	10.63
ACOT7	CHPF2	37	984	512	898	870	0.578	8.95	11.52	12.56	9.71	9.34	10.40	9.09	10.72	7.77	9.41
ABI1	CHPT1	675	937	870	908	953	0.179	12.04	11.93	11.33	10.85	10.60	11.91	11.21	10.99	10.47	10.38
CD59	CHPT1	817	996	755	744	618	0.525	12.06	11.93	13.27	10.85	12.66	11.91	15.08	10.99	13.88	10.38
CCM2	CHST10	41	897	601	745	877	0.432	12.49	7.66	12.30	11.10	11.97	5.66	10.62	7.74	10.95	8.59
CFL2	CHTOP	627	944	883	892	526	0.424	7.83	11.88	11.08	11.19	11.89	11.41	10.71	11.45	14.42	11.95
ATP6V1B2	CIAO1	683	995	995	943	992	0.183	13.91	10.53	13.89	9.83	11.51	10.49	12.98	9.73	12.08	10.27
ATP6V1D	CIAO1	770	993	988	984	987	0.121	10.94	10.53	11.92	9.83	10.07	10.49	10.13	9.73	11.05	10.27
CCNH	CIAO1	877	979	928	446	798	0.406	10.62	10.53	9.71	9.83	9.93	10.49	9.89	9.73	10.11	10.27
AFTPH	CIAPIN1	878	994	895	922	884	0.199	11.51	10.19	10.31	10.37	10.58	10.27	10.39	9.97	10.27	10.77
ANKH	CIAPIN1	236	998	821	708	33	0.732	10.99	10.19	12.55	10.37	11.70	10.27	10.76	9.97	12.06	10.77
ANKRD17	CIAPIN1	911	994	982	915	991	0.088	11.01	10.19	12.06	10.37	11.84	10.27	12.00	9.97	12.31	10.77
APLP2	CIAPIN1	779	972	890	920	901	0.199	14.29	10.19	14.14	10.37	14.20	10.27	15.53	9.97	12.35	10.77
ARIH1	CIAPIN1	694	994	982	746	910	0.322	11.38	10.19	10.78	10.37	10.92	10.27	11.48	9.97	12.18	10.77
ARL3	CIAPIN1	803	984	930	881	754	0.284	9.35	10.19	11.61	10.37	8.63	10.27	9.59	9.97	9.10	10.77
ATP2A2	CIAPIN1	882	991	952	827	201	0.402	11.26	10.19	13.85	10.37	13.40	10.27	13.45	9.97	16.43	10.77
ATP6AP2	CIAPIN1	908	998	983	959	932	0.105	12.10	10.19	12.38	10.37	11.55	10.27	12.27	9.97	10.23	10.77
ATP6V1A	CIAPIN1	764	1000	989	997	887	0.181	11.71	10.19	12.61	10.37	11.30	10.27	11.06	9.97	9.74	10.77
BMPR2	CIAPIN1	906	969	553	425	711	0.603	9.83	10.19	11.76	10.37	10.78	10.27	13.09	9.97	11.28	10.77
CDK20	CIAPIN1	810	999	850	917	630	0.395	6.91	10.19	10.02	10.37	7.89	10.27	7.43	9.97	6.58	10.77
CEP68	CIAPIN1	827	1000	640	283	477	0.766	10.17	10.19	10.65	10.37	8.45	10.27	9.84	9.97	11.68	10.77
CHMP4B	CIAPIN1	875	995	996	807	990	0.157	12.77	10.19	12.67	10.37	11.26	10.27	12.32	9.97	12.89	10.77
CHPF2	CIAPIN1	915	974	991	1000	908	0.062	11.52	10.19	9.71	10.37	10.40	10.27	10.72	9.97	9.41	10.77
ALDH6A1	CIB1	743	853	21	349	111	0.585	8.42	11.73	12.86	9.92	13.70	12.09	9.40	11.19	10.84	10.34
AMD1	CIPC	0	0	0	0	0	0.000	11.47	0.00	11.63	0.00	10.87	0.00	11.53	0.00	11.09	0.00
ACOT7	CIRH1A	923	936	643	797	846	0.268	8.95	9.74	12.56	10.10	9.34	9.84	9.09	9.82	7.77	11.51
AMN1	CIRH1A	127	954	871	742	935	0.384	8.84	9.74	8.55	10.10	5.90	9.84	6.21	9.82	8.60	11.51
ANAPC13	CIRH1A	643	941	962	879	826	0.237	10.46	9.74	10.62	10.10	10.51	9.84	10.28	9.82	11.10	11.51
ANKH	CIRH1A	554	945	738	671	4	0.658	10.99	9.74	12.55	10.10	11.70	9.84	10.76	9.82	12.06	11.51
ARL3	CIRH1A	212	965	877	641	675	0.584	9.35	9.74	11.61	10.10	8.63	9.84	9.59	9.82	9.10	11.51
ATP5L	CIRH1A	704	960	951	894	221	0.396	11.23	9.74	11.58	10.10	11.61	9.84	11.14	9.82	12.13	11.51
ATP6AP1	CIRH1A	581	956	965	895	527	0.432	13.29	9.74	13.19	10.10	11.67	9.84	13.09	9.82	11.37	11.51
ATP6AP2	CIRH1A	674	979	957	889	880	0.258	12.10	9.74	12.38	10.10	11.55	9.84	12.27	9.82	10.23	11.51
ATP6V0C	CIRH1A	299	828	991	893	793	0.181	14.12	9.74	14.26	10.10	12.30	9.84	12.91	9.82	12.61	11.51
ATP6V1A	CIRH1A	247	972	945	918	620	0.453	11.71	9.74	12.61	10.10	11.30	9.84	11.06	9.82	9.74	11.51
ATP6V1B2	CIRH1A	122	980	961	902	935	0.311	13.91	9.74	13.89	10.10	11.51	9.84	12.98	9.82	12.08	11.51
BASP1	CIRH1A	62	935	902	543	316	0.647	14.45	9.74	14.01	10.10	8.06	9.84	10.34	9.82	6.68	11.51
C14orf2	CIRH1A	362	960	828	865	164	0.574	10.51	9.74	12.11	10.10	11.13	9.84	10.10	9.82	11.87	11.51
CCNY	CIRH1A	391	945	908	831	840	0.350	11.79	9.74	12.12	10.10	11.64	9.84	11.52	9.82	11.36	11.51
AARS	CISD2	293	954	960	964	918	0.245	10.69	9.51	13.64	9.52	12.72	10.82	12.45	8.52	12.26	8.54
ANKRD17	CISD2	225	969	895	898	697	0.443	11.01	9.51	12.06	9.52	11.84	10.82	12.00	8.52	12.31	8.54
ARHGEF7	CISD2	172	942	570	120	888	0.655	11.16	9.51	12.80	9.52	11.77	10.82	12.22	8.52	12.19	8.54
ATP6AP1	CISD2	86	943	942	937	991	0.225	13.29	9.51	13.19	9.52	11.67	10.82	13.09	8.52	11.37	8.54
ATXN10	CISD2	508	993	945	995	980	0.273	10.75	9.51	12.39	9.52	11.53	10.82	11.48	8.52	11.84	8.54
CAB39	CISD2	313	1000	990	909	882	0.359	12.72	9.51	12.00	9.52	11.15	10.82	11.94	8.52	13.20	8.54
CCSER2	CISD2	175	997	891	687	870	0.520	10.75	9.51	11.41	9.52	10.15	10.82	11.24	8.52	12.40	8.54
CDC37L1	CISD2	532	998	667	646	491	0.824	8.51	9.51	9.86	9.52	11.36	10.82	9.42	8.52	12.03	8.54
CD300LG	CISH	182	109	97	100	53	0.000	3.97	10.79	2.29	4.33	4.00	11.06	8.21	10.54	9.48	10.12
CEACAM3	CISH	620	459	238	107	375	0.000	12.31	10.79	1.33	4.33	4.69	11.06	6.04	10.54	2.77	10.12
ACTR1B	CITED2	753	932	578	709	297	0.594	10.95	11.30	12.75	9.80	11.65	12.33	11.43	12.67	11.85	11.30
ANKH	CITED2	649	933	299	564	30	0.759	10.99	11.30	12.55	9.80	11.70	12.33	10.76	12.67	12.06	11.30
ANKMY2	CITED2	697	913	334	685	113	0.635	8.70	11.30	10.40	9.80	9.01	12.33	8.93	12.67	9.78	11.30
ANXA6	CITED2	677	963	96	533	133	0.821	13.34	11.30	13.41	9.80	13.42	12.33	13.49	12.67	13.33	11.30
ARL4C	CITED2	690	995	847	255	376	0.722	12.00	11.30	10.94	9.80	8.86	12.33	10.55	12.67	7.25	11.30
ATP1A1	CITED2	830	989	191	598	154	0.764	12.75	11.30	14.66	9.80	12.79	12.33	15.05	12.67	12.75	11.30
ATP5A1	CITED2	612	970	129	680	17	0.794	12.98	11.30	14.59	9.80	14.03	12.33	13.65	12.67	15.13	11.30
BCAS2	CITED2	743	958	490	717	432	0.686	9.60	11.30	10.38	9.80	9.89	12.33	9.11	12.67	10.37	11.30
C12orf57	CITED2	603	703	575	612	114	0.261	9.49	11.30	9.98	9.80	9.90	12.33	9.87	12.67	9.69	11.30
C15orf61	CITED2	775	907	590	744	72	0.509	7.55	11.30	7.69	9.80	7.55	12.33	6.69	12.67	9.87	11.30
C16orf45	CITED2	536	963	384	439	579	0.869	8.03	11.30	13.31	9.80	9.72	12.33	9.12	12.67	11.79	11.30
CAMK2G	CITED2	276	879	345	704	29	0.656	12.20	11.30	13.75	9.80	10.30	12.33	11.04	12.67	12.36	11.30
CERK	CITED2	538	974	303	614	274	0.872	12.18	11.30	11.53	9.80	10.91	12.33	11.07	12.67	11.09	11.30
ACTR10	CKAP5	128	999	865	1000	838	0.397	10.67	10.46	11.18	12.52	10.08	11.69	10.38	11.16	10.76	12.55
ADK	CKAP5	891	914	673	965	916	0.132	9.38	10.46	8.69	12.52	11.59	11.69	9.31	11.16	9.63	12.55
AFTPH	CKAP5	454	996	852	975	981	0.338	11.51	10.46	10.31	12.52	10.58	11.69	10.39	11.16	10.27	12.55
AKTIP	CKAP5	120	988	839	989	740	0.443	10.10	10.46	11.35	12.52	9.95	11.69	9.76	11.16	11.55	12.55
ANKH	CKAP5	666	995	757	796	208	0.630	10.99	10.46	12.55	12.52	11.70	11.69	10.76	11.16	12.06	12.55
ANKRD46	CKAP5	661	990	827	932	788	0.376	7.77	10.46	10.73	12.52	10.25	11.69	8.45	11.16	10.73	12.55
APMAP	CKAP5	86	992	505	985	752	0.613	13.88	10.46	11.98	12.52	14.10	11.69	11.96	11.16	10.81	12.55
ATP5L	CKAP5	487	955	697	984	560	0.554	11.23	10.46	11.58	12.52	11.61	11.69	11.14	11.16	12.13	12.55
ATP6V0C	CKAP5	244	840	575	848	830	0.307	14.12	10.46	14.26	12.52	12.30	11.69	12.91	11.16	12.61	12.55
ATP6V1D	CKAP5	278	993	644	998	938	0.449	10.94	10.46	11.92	12.52	10.07	11.69	10.13	11.16	11.05	12.55
ATP6V1G1	CKAP5	455	900	729	991	944	0.285	11.16	10.46	10.88	12.52	11.23	11.69	11.29	11.16	11.40	12.55
BCAS2	CKAP5	823	965	654	919	770	0.347	9.60	10.46	10.38	12.52	9.89	11.69	9.11	11.16	10.37	12.55
BTBD1	CKAP5	762	996	592	945	816	0.434	10.44	10.46	11.99	12.52	10.71	11.69	10.91	11.16	13.94	12.55
C10orf32	CKAP5	629	889	847	840	786	0.227	8.99	10.46	9.75	12.52	11.17	11.69	9.58	11.16	10.22	12.55
C11orf58	CKAP5	678	983	651	982	967	0.327	11.11	10.46	11.42	12.52	11.41	11.69	11.91	11.16	12.00	12.55
C1D	CKAP5	176	965	860	980	854	0.341	9.22	10.46	8.54	12.52	9.39	11.69	8.42	11.16	9.64	12.55
CAPZA2	CKAP5	56	957	713	990	712	0.473	11.80	10.46	11.44	12.52	11.42	11.69	12.03	11.16	12.66	12.55
CCDC115	CKAP5	694	991	930	947	902	0.245	10.40	10.46	10.47	12.52	9.37	11.69	9.70	11.16	9.05	12.55
CCDC28A	CKAP5	214	986	867	861	901	0.407	10.97	10.46	10.03	12.52	10.08	11.69	9.04	11.16	8.93	12.55
CCNC	CKAP5	627	990	770	937	967	0.330	9.19	10.46	9.80	12.52	11.46	11.69	10.03	11.16	9.67	12.55
CCNH	CKAP5	725	961	431	280	592	0.763	10.62	10.46	9.71	12.52	9.93	11.69	9.89	11.16	10.11	12.55
CCNT2	CKAP5	420	975	904	811	905	0.390	10.43	10.46	10.63	12.52	11.34	11.69	11.35	11.16	10.76	12.55
CCNY	CKAP5	109	946	822	951	942	0.287	11.79	10.46	12.12	12.52	11.64	11.69	11.52	11.16	11.36	12.55
CDK17	CKAP5	706	973	674	164	902	0.555	9.99	10.46	10.71	12.52	9.68	11.69	11.00	11.16	9.78	12.55
CHMP2B	CKAP5	187	972	666	929	966	0.413	10.83	10.46	9.81	12.52	10.42	11.69	10.30	11.16	10.84	12.55
CISD2	CKAP5	426	981	649	993	858	0.468	9.51	10.46	9.52	12.52	10.82	11.69	8.52	11.16	8.54	12.55
ATP6AP1	CLASP2	550	909	976	828	857	0.246	13.29	9.87	13.19	13.17	11.67	9.92	13.09	10.84	11.37	11.55
ATP6V0B	CLASP2	426	860	892	688	70	0.446	13.65	9.87	12.20	13.17	12.06	9.92	12.02	10.84	11.51	11.55
ATP6V0D1	CLASP2	268	895	942	682	616	0.444	13.64	9.87	12.71	13.17	11.55	9.92	12.10	10.84	12.12	11.55
CISD2	CLASP2	489	941	896	831	825	0.356	9.51	9.87	9.52	13.17	10.82	9.92	8.52	10.84	8.54	11.55
AIG1	CLCC1	674	982	791	988	25	0.490	9.57	8.19	10.35	8.71	12.31	9.20	9.19	8.99	8.37	10.15
AACS	CLCN6	976	987	729	897	652	0.347	9.30	10.11	11.54	11.94	8.69	10.82	9.50	11.19	9.15	10.60
AUH	CLCN6	738	996	479	904	640	0.601	8.85	10.11	9.37	11.94	9.70	10.82	8.57	11.19	9.66	10.60
CA2	CLDND1	264	838	388	503	342	0.674	10.29	11.02	10.88	12.66	12.01	10.52	9.30	11.27	10.45	10.61
C1orf198	CLIC4	617	992	578	883	366	0.695	8.35	10.09	11.86	11.33	10.07	11.83	12.70	14.16	12.61	11.51
CAPN3	CLIC4	426	651	380	28	223	0.302	10.90	10.09	10.87	11.33	11.03	11.83	10.84	14.16	14.61	11.51
BNIP3	CLINT1	755	988	940	763	936	0.279	9.50	11.14	11.44	9.91	12.07	12.32	9.81	11.76	12.63	11.89
BTBD10	CLINT1	684	930	972	876	992	0.150	10.02	11.14	10.90	9.91	8.60	12.32	9.21	11.76	9.69	11.89
CHCHD3	CLINT1	800	995	817	968	735	0.330	10.55	11.14	9.63	9.91	9.87	12.32	10.29	11.76	12.78	11.89
ABCF3	CLIP3	830	998	591	414	533	0.769	11.00	7.54	11.13	14.73	11.41	7.65	10.66	9.40	11.65	8.22
ACP1	CLIP3	666	1000	576	331	640	0.809	10.60	7.54	11.17	14.73	11.47	7.65	10.94	9.40	11.32	8.22
ACTR1A	CLIP3	380	1000	554	510	681	0.877	12.69	7.54	13.19	14.73	11.53	7.65	12.55	9.40	13.28	8.22
ADSL	CLIP3	615	993	445	198	504	0.926	10.59	7.54	9.07	14.73	10.19	7.65	9.86	9.40	12.92	8.22
AFG3L2	CLIP3	712	1000	184	110	253	0.894	9.57	7.54	10.17	14.73	10.61	7.65	9.71	9.40	12.40	8.22
ALAS1	CLIP3	471	979	157	47	99	0.958	11.62	7.54	10.59	14.73	13.01	7.65	11.01	9.40	11.83	8.22
APEH	CLIP3	641	996	207	246	524	0.909	11.53	7.54	11.27	14.73	11.97	7.65	10.92	9.40	12.44	8.22
APOA1BP	CLIP3	802	931	388	173	670	0.626	10.28	7.54	10.83	14.73	11.06	7.65	10.15	9.40	10.64	8.22
ARFIP2	CLIP3	841	1000	345	201	796	0.681	10.53	7.54	10.86	14.73	11.02	7.65	10.59	9.40	9.79	8.22
ASNA1	CLIP3	505	1000	559	263	696	0.870	11.29	7.54	11.23	14.73	10.27	7.65	10.37	9.40	10.86	8.22
ATP5D	CLIP3	745	757	445	542	282	0.370	11.21	7.54	11.97	14.73	12.45	7.65	10.60	9.40	13.25	8.22
ATP6V0B	CLIP3	312	995	493	198	586	0.947	13.65	7.54	12.20	14.73	12.06	7.65	12.02	9.40	11.51	8.22
ATP6V1G1	CLIP3	464	895	711	284	689	0.590	11.16	7.54	10.88	14.73	11.23	7.65	11.29	9.40	11.40	8.22
BAP1	CLIP3	589	968	470	536	751	0.748	12.00	7.54	13.60	14.73	11.95	7.65	11.95	9.40	12.16	8.22
C16orf13	CLIP3	809	917	667	561	703	0.464	10.28	7.54	11.15	14.73	10.34	7.65	9.75	9.40	10.40	8.22
C19orf70	CLIP3	702	904	564	289	559	0.645	9.70	7.54	10.56	14.73	10.35	7.65	9.50	9.40	11.25	8.22
CCNDBP1	CLIP3	87	1000	659	648	867	0.663	12.79	7.54	10.52	14.73	10.01	7.65	10.76	9.40	11.19	8.22
CDC123	CLIP3	77	998	343	146	692	0.900	11.51	7.54	10.35	14.73	10.16	7.65	9.87	9.40	10.37	8.22
CDC37	CLIP3	681	944	753	257	741	0.550	12.73	7.54	12.87	14.73	12.45	7.65	13.34	9.40	13.20	8.22
CHMP4B	CLIP3	461	998	602	280	647	0.872	12.77	7.54	12.67	14.73	11.26	7.65	12.32	9.40	12.89	8.22
CIAPIN1	CLIP3	716	1000	351	149	338	0.892	10.19	7.54	10.37	14.73	10.27	7.65	9.97	9.40	10.77	8.22
BET1	CLIP4	879	977	530	647	494	0.676	8.59	9.90	7.92	10.67	9.86	8.37	8.79	11.16	8.53	12.72
C1orf43	CLIP4	661	869	672	652	761	0.365	12.12	9.90	12.69	10.67	12.85	8.37	12.53	11.16	13.64	12.72
CCDC47	CLIP4	855	922	514	637	884	0.399	10.94	9.90	11.13	10.67	11.98	8.37	11.88	11.16	12.42	12.72
ACSL1	CLK1	574	933	93	118	264	0.829	16.81	12.09	10.48	12.07	15.79	12.50	14.09	13.06	15.03	12.24
ANKRD13A	CLMN	991	971	531	778	713	0.446	12.88	10.84	9.96	10.48	10.66	11.83	11.62	10.61	9.77	10.19
ARRDC2	CLMN	15	961	181	507	767	0.785	12.03	10.84	10.43	10.48	10.05	11.83	12.48	10.61	13.11	10.19
BBX	CLMN	411	915	318	856	810	0.497	10.52	10.84	10.18	10.48	9.81	11.83	10.92	10.61	10.32	10.19
BIN1	CLMN	15	930	578	668	552	0.711	11.42	10.84	13.38	10.48	10.84	11.83	10.41	10.61	15.53	10.19
C21orf91	CLMN	878	988	497	604	779	0.596	9.55	10.84	7.59	10.48	8.42	11.83	8.66	10.61	8.42	10.19
CAPN3	CLMN	317	993	515	305	76	0.979	10.90	10.84	10.87	10.48	11.03	11.83	10.84	10.61	14.61	10.19
C21orf91	CLN8	452	775	746	348	760	0.297	9.55	10.47	7.59	9.92	8.42	10.17	8.66	10.36	8.42	9.71
CLMN	CLN8	118	943	736	832	634	0.535	10.84	10.47	10.48	9.92	11.83	10.17	10.61	10.36	10.19	9.71
ACO2	CLNS1A	630	940	958	980	666	0.292	10.98	10.20	13.28	10.93	11.13	11.38	10.79	10.14	14.13	11.21
C20orf194	CLNS1A	932	990	931	952	833	0.156	9.07	10.20	11.98	10.93	8.78	11.38	10.84	10.14	11.80	11.21
ALAS1	CLOCK	409	950	744	806	378	0.625	11.62	8.86	10.59	10.19	13.01	9.93	11.01	10.26	11.83	11.21
AP2A2	CLOCK	878	951	909	960	935	0.066	11.52	8.86	12.91	10.19	12.19	9.93	12.23	10.26	11.17	11.21
APOO	CLOCK	735	956	939	793	325	0.428	8.02	8.86	9.77	10.19	8.10	9.93	6.73	10.26	9.50	11.21
ATP5B	CLOCK	863	988	936	941	222	0.356	13.74	8.86	14.91	10.19	14.35	9.93	14.31	10.26	15.46	11.21
ATP5C1	CLOCK	885	986	902	952	481	0.352	11.21	8.86	11.93	10.19	12.64	9.93	11.58	10.26	13.26	11.21
ATP5G3	CLOCK	898	961	881	863	85	0.351	11.42	8.86	12.34	10.19	13.03	9.93	11.62	10.26	13.28	11.21
ATP5H	CLOCK	749	884	887	884	412	0.260	10.99	8.86	11.77	10.19	11.93	9.93	11.03	10.26	12.93	11.21
[truncated: 60,180 more rows]
