# Supplementary material for: Differential coexpression in human tissues and the confounding effect of mean expression levels
Source: Bioinformatics. 2018 Jul 3;35(1):55–61. doi: 10.1093/bioinformatics/bty538 (PMC6298061; doi:10.1093/bioinformatics/bty538)
Supplement: Supplementary Data [file bty538_suppl_data.zip › TSlinksTSS_liver_pureLinks_GTEx_exp.csv]

gene_A	gene_B	blood_corr	brain_cortex_corr	liver_corr	lung_corr	skeletalMuscle_corr	GTExTSS	gA_bloodExp	gB_bloodExp	gA_brainExp	gB_brainExp	gA_liverExp	gB_liverExp	gA_lungExp	gB_lungExp	gA_muscleExp	gB_muscleExp
ABHD6	ACBD4	646	689	750	851	456	0.207	8.61	9.57	9.93	9.65	11.20	12.12	8.06	8.77	8.20	8.55
ACAT1	ADH4	0	0	77	72	24	0.000	9.64	4.44	10.70	0.89	14.36	14.79	10.77	2.51	13.55	5.00
ACBD5	ADH4	0	0	875	141	69	0.000	10.00	4.44	11.13	0.89	11.35	14.79	9.46	2.51	10.88	5.00
ADH4	ADHFE1	101	108	876	81	45	0.752	4.44	8.66	0.89	9.62	14.79	12.15	2.51	9.00	5.00	11.31
ACOT9	AEN	555	840	958	789	775	0.436	11.15	10.10	8.73	8.06	9.56	9.67	10.94	9.39	10.62	9.89
ACSS2	ALDOC	105	273	843	854	707	0.411	11.19	10.55	10.40	15.67	12.50	11.26	12.02	8.41	12.83	7.43
ADIPOR2	ALDOC	517	177	942	520	361	0.866	11.66	10.55	11.71	15.67	12.99	11.26	12.53	8.41	11.90	7.43
AK1	ALG3	580	889	984	568	371	0.700	10.63	10.27	11.71	8.42	10.92	11.21	11.47	9.57	13.90	10.21
ABCC1	AMICA1	95	59	905	430	32	0.810	10.87	13.99	8.72	3.15	8.42	8.01	11.69	10.35	11.54	5.76
ACTA2	ANK3	139	46	953	110	146	0.906	9.32	7.81	8.68	12.43	11.01	9.32	14.17	9.27	11.33	11.64
AEBP1	ANK3	713	2	979	13	123	0.852	9.24	7.81	11.07	12.43	11.28	9.32	14.79	9.27	10.88	11.64
ABCC1	ARHGAP30	318	65	896	710	138	0.687	10.87	14.26	8.72	5.78	8.42	8.61	11.69	11.40	11.54	7.30
ABCC1	ARHGEF10	855	88	823	780	111	0.344	10.87	7.28	8.72	10.76	8.42	8.43	11.69	12.15	11.54	9.12
ANK3	ARHGEF10	792	247	884	343	332	0.622	7.81	7.28	12.43	10.76	9.32	8.43	9.27	12.15	11.64	9.12
APH1B	ARHGEF3	183	587	679	688	835	0.136	10.85	10.98	9.34	10.85	7.64	7.58	9.53	10.63	8.68	9.47
ANXA5	ARL4C	91	32	755	625	892	0.320	12.97	12.00	11.49	10.94	12.29	8.86	14.44	10.55	11.68	7.25
ARHGAP18	ARL4C	197	649	783	559	224	0.462	9.71	12.00	6.02	10.94	7.83	8.86	11.17	10.55	8.93	7.25
ARHGDIB	ARL4C	2	426	898	549	808	0.618	16.50	12.00	8.63	10.94	10.52	8.86	13.01	10.55	10.22	7.25
ABCC1	ARPC1B	94	94	934	822	187	0.707	10.87	13.85	8.72	7.87	8.42	10.77	11.69	12.41	11.54	8.85
ARHGEF3	ARPC1B	187	186	449	359	510	0.000	10.98	13.85	10.85	7.87	7.58	10.77	10.63	12.41	9.47	8.85
ADA	ARPC2	30	280	993	657	721	0.797	10.05	14.63	6.77	12.36	7.50	11.91	8.07	13.74	8.35	13.04
ADM	ARPC5L	534	86	868	581	333	0.678	12.97	10.88	7.41	11.60	10.45	10.90	12.16	10.85	10.85	11.00
ARL4C	ASAH1	10	810	766	273	330	0.399	12.00	13.59	10.94	11.48	8.86	11.36	10.55	13.46	7.25	11.86
ACBD6	ATP6V0E1	265	162	956	983	950	0.459	9.47	13.70	9.15	10.28	8.86	12.07	9.20	12.66	9.75	11.79
ABLIM1	B4GALT5	134	553	887	655	597	0.622	11.00	12.86	13.27	10.64	12.16	11.05	13.05	11.83	13.22	12.62
ACBD4	BACE1	789	617	789	839	736	0.113	9.57	8.44	9.65	11.77	12.12	11.13	8.77	10.66	8.55	10.53
ALDH5A1	BACE1	450	426	892	850	92	0.609	9.01	8.44	12.08	11.77	12.51	11.13	8.14	10.66	11.08	10.53
APH1B	BACE2	27	304	949	741	361	0.777	10.85	8.50	9.34	7.28	7.64	8.28	9.53	10.19	8.68	9.34
ARHGEF3	BACE2	369	345	635	563	378	0.238	10.98	8.50	10.85	7.28	7.58	8.28	10.63	10.19	9.47	9.34
ARL4C	BACE2	637	135	770	538	771	0.318	12.00	8.50	10.94	7.28	8.86	8.28	10.55	10.19	7.25	9.34
ARPC2	BACE2	47	415	903	822	478	0.645	14.63	8.50	12.36	7.28	11.91	8.28	13.74	10.19	13.04	9.34
ASAH1	BACE2	49	526	919	549	529	0.786	13.59	8.50	11.48	7.28	11.36	8.28	13.46	10.19	11.86	9.34
ACBD4	BAD	842	842	857	926	594	0.146	9.57	9.87	9.65	10.51	12.12	9.92	8.77	9.23	8.55	9.16
AOAH	BASP1	628	358	926	611	779	0.593	12.91	14.45	4.85	14.01	7.34	8.06	8.81	10.34	4.97	6.68
ARHGAP30	BASP1	904	30	965	403	791	0.583	14.26	14.45	5.78	14.01	8.61	8.06	11.40	10.34	7.30	6.68
ARHGEF6	BASP1	590	106	887	307	88	0.729	11.94	14.45	10.49	14.01	8.77	8.06	11.28	10.34	11.80	6.68
ARHGEF3	BCL2	981	228	969	874	145	0.516	10.98	10.02	10.85	9.58	7.58	7.28	10.63	8.96	9.47	10.41
ATL3	BECN1	1000	404	941	972	781	0.300	11.01	11.06	9.69	9.93	11.60	9.52	12.12	10.02	10.15	11.41
ARHGAP25	BLVRA	599	742	979	686	761	0.564	13.28	10.54	6.44	9.62	8.31	6.99	10.21	10.47	7.50	10.30
ARHGAP30	BLVRA	723	106	995	911	731	0.557	14.26	10.54	5.78	9.62	8.61	6.99	11.40	10.47	7.30	10.30
ABCC1	C10orf54	60	2	995	750	291	0.865	10.87	16.77	8.72	10.76	8.42	9.18	11.69	12.82	11.54	10.07
ACTN1	C12orf49	630	797	995	241	541	0.756	14.08	9.22	12.23	9.36	12.55	8.49	13.65	10.34	10.75	7.84
ANXA5	C12orf49	899	525	998	819	826	0.462	12.97	9.22	11.49	9.36	12.29	8.49	14.44	10.34	11.68	7.84
C10orf2	C12orf49	962	677	939	864	966	0.169	8.15	9.22	7.25	9.36	8.68	8.49	6.85	10.34	9.81	7.84
C11orf71	C16orf45	101	108	96	50	47	0.000	0.00	8.03	0.00	13.31	0.00	9.72	0.00	9.12	0.00	11.79
AGFG2	C16orf70	191	564	908	917	733	0.464	9.36	10.50	10.29	9.40	12.23	11.51	9.23	8.92	8.92	10.40
ARHGAP35	C16orf70	810	923	810	914	715	0.048	10.17	10.50	13.20	9.40	12.36	11.51	11.42	8.92	11.76	10.40
ATR	C1orf198	687	204	844	283	886	0.422	9.59	8.35	9.64	11.86	10.15	10.07	9.93	12.70	9.68	12.61
ALKBH7	C2	395	425	593	792	114	0.140	10.62	8.88	9.79	6.16	11.53	14.70	9.51	11.67	11.11	7.04
ALAD	C6orf106	683	408	807	856	941	0.215	10.83	12.16	12.12	13.04	13.07	13.10	10.56	12.59	10.62	14.15
BACE1	C8orf82	788	436	642	855	753	0.071	8.44	9.32	11.77	9.05	11.13	11.26	10.66	8.99	10.53	9.62
ADHFE1	C9orf3	835	88	456	471	769	0.000	8.66	7.99	9.62	9.53	12.15	12.09	9.00	10.50	11.31	11.25
AGPAT3	CACFD1	951	684	896	981	276	0.304	11.40	8.73	12.76	9.08	12.71	11.92	11.53	9.64	12.78	9.21
BACE1	CACFD1	675	600	731	826	937	0.093	8.44	8.73	11.77	9.08	11.13	11.92	10.66	9.64	10.53	9.21
ARRDC2	CALHM2	621	240	793	253	278	0.525	12.03	10.76	10.43	8.09	10.05	7.57	12.48	10.13	13.11	8.90
ACACB	CAPN5	422	19	929	338	1	0.858	9.42	9.12	10.48	10.52	13.66	12.54	10.47	8.83	14.55	7.59
ACSS2	CAPN5	9	589	884	175	675	0.636	11.19	9.12	10.40	10.52	12.50	12.54	12.02	8.83	12.83	7.59
AKT2	CAPN5	239	631	782	818	476	0.357	12.55	9.12	12.12	10.52	13.25	12.54	12.27	8.83	13.26	7.59
C8orf82	CAPN5	479	576	978	417	113	0.918	9.32	9.12	9.05	10.52	11.26	12.54	8.99	8.83	9.62	7.59
ARHGAP35	CARHSP1	737	239	806	178	316	0.493	10.17	10.68	13.20	9.59	12.36	11.58	11.42	11.15	11.76	8.62
CAPN5	CARHSP1	220	48	862	474	845	0.551	9.12	10.68	10.52	9.59	12.54	11.58	8.83	11.15	7.59	8.62
AKAP1	CASC10	0	466	818	468	428	0.000	9.26	2.58	11.42	8.36	12.35	8.98	11.05	4.65	13.22	4.14
AMT	CASC10	0	257	999	647	606	0.000	9.69	2.58	9.84	8.36	11.69	8.98	10.01	4.65	9.67	4.14
C11orf71	CASC10	0	108	96	50	47	0.000	0.00	2.58	0.00	8.36	0.00	8.98	0.00	4.65	0.00	4.14
C8orf82	CASC10	0	679	965	801	153	0.000	9.32	2.58	9.05	8.36	11.26	8.98	8.99	4.65	9.62	4.14
CAPN5	CASC10	0	386	995	835	805	0.000	9.12	2.58	10.52	8.36	12.54	8.98	8.83	4.65	7.59	4.14
ATP5J	CAT	799	310	622	916	518	0.113	9.74	13.04	11.36	10.23	11.91	14.24	10.12	12.43	12.56	12.34
APH1B	CCDC109B	361	446	962	921	662	0.632	10.85	10.24	9.34	5.46	7.64	6.05	9.53	8.12	8.68	6.87
C10orf54	CCDC109B	206	467	967	673	755	0.720	16.77	10.24	10.76	5.46	9.18	6.05	12.82	8.12	10.07	6.87
AAMDC	CCDC28A	699	279	965	940	146	0.611	6.76	10.97	5.29	10.03	7.27	10.08	6.99	9.04	9.70	8.93
BCKDK	CCDC57	820	971	813	788	300	0.169	12.01	11.10	10.53	10.66	11.86	10.46	10.42	10.92	11.67	9.62
AP1S2	CCND3	642	492	975	827	333	0.716	10.84	14.09	10.40	11.74	8.09	9.88	9.86	12.72	11.74	9.70
ARPC2	CCND3	996	777	998	953	662	0.302	14.63	14.09	12.36	11.74	11.91	9.88	13.74	12.72	13.04	9.70
BLVRA	CCND3	690	794	969	994	797	0.313	10.54	14.09	9.62	11.74	6.99	9.88	10.47	12.72	10.30	9.70
BLVRA	CD53	639	638	999	909	519	0.645	10.54	15.30	9.62	8.05	6.99	8.96	10.47	12.14	10.30	7.24
C4orf48	CD59	508	68	926	125	332	0.848	7.94	12.06	8.06	13.27	4.49	12.66	4.56	15.08	3.35	13.88
AGTPBP1	CDC42SE1	899	888	986	937	575	0.323	12.39	14.50	10.71	11.10	8.67	11.08	10.76	12.81	10.43	10.91
ANXA11	CDC42SE1	994	714	989	819	878	0.278	14.17	14.50	12.34	11.10	11.72	11.08	13.42	12.81	13.41	10.91
ANK3	CDKN1C	585	559	819	312	409	0.566	7.81	8.97	12.43	8.57	9.32	7.84	9.27	9.89	11.64	10.60
ABCC1	CELF2	405	979	944	852	707	0.387	10.87	13.59	8.72	12.90	8.42	8.49	11.69	12.77	11.54	11.43
AOAH	CELF2	785	446	996	639	527	0.766	12.91	13.59	4.85	12.90	7.34	8.49	8.81	12.77	4.97	11.43
ARPC1B	CELF2	927	160	749	675	695	0.189	13.85	13.59	7.87	12.90	10.77	8.49	12.41	12.77	8.85	11.43
ABCC1	CEP85L	850	826	642	610	560	0.057	10.87	9.45	8.72	8.46	8.42	8.04	11.69	8.96	11.54	10.51
C16orf70	CHDH	210	9	970	884	302	0.748	10.50	6.05	9.40	10.17	11.51	12.42	8.92	7.98	10.40	9.09
CBR4	CHPT1	632	621	828	774	766	0.260	9.23	11.93	9.36	10.85	11.24	11.91	8.78	10.99	10.01	10.38
BNIP3	CISD3	624	742	923	763	460	0.531	9.50	9.61	11.44	9.44	12.07	11.98	9.81	8.97	12.63	9.98
ARL4C	CLIC1	4	43	908	675	938	0.524	12.00	14.83	10.94	8.59	8.86	11.25	10.55	13.61	7.25	10.15
BICD2	CLIC1	946	188	977	901	631	0.465	11.56	14.83	10.60	8.59	10.01	11.25	11.23	13.61	11.16	10.15
BACE2	CLIP4	390	570	790	570	193	0.510	8.50	9.90	7.28	10.67	8.28	8.37	10.19	11.16	9.34	12.72
AK1	CLPB	490	686	949	450	456	0.805	10.63	9.63	11.71	8.34	10.92	9.62	11.47	7.96	13.90	9.32
C2	CLPP	581	688	976	911	304	0.612	8.88	10.76	6.16	9.70	14.70	11.07	11.67	9.89	7.04	11.32
ACADS	CMBL	336	635	958	882	584	0.616	10.09	7.17	9.05	9.51	13.50	12.25	9.30	8.09	12.57	12.16
ALDH5A1	CMBL	735	983	999	937	862	0.239	9.01	7.17	12.08	9.51	12.51	12.25	8.14	8.09	11.08	12.16
C8orf82	CMBL	180	595	935	933	412	0.606	9.32	7.17	9.05	9.51	11.26	12.25	8.99	8.09	9.62	12.16
CA2	CMBL	597	430	854	584	530	0.603	10.29	7.17	10.88	9.51	12.01	12.25	9.30	8.09	10.45	12.16
CAPN5	CMBL	578	720	993	565	350	0.804	9.12	7.17	10.52	9.51	12.54	12.25	8.83	8.09	7.59	12.16
CASC10	CMBL	101	866	1000	885	300	0.625	2.58	7.17	8.36	9.51	8.98	12.25	4.65	8.09	4.14	12.16
CCNB1IP1	CMBL	458	682	884	502	53	0.676	9.46	7.17	9.93	9.51	10.64	12.25	10.36	8.09	10.92	12.16
CCS	CMBL	434	562	648	894	231	0.191	10.83	7.17	9.88	9.51	11.80	12.25	9.71	8.09	9.62	12.16
ANXA11	CMTM3	972	136	927	794	716	0.386	14.17	11.85	12.34	6.96	11.72	8.18	13.42	10.90	13.41	8.39
ABCC1	CMTM7	613	112	1000	887	118	0.750	10.87	11.80	8.72	4.61	8.42	7.65	11.69	10.12	11.54	7.08
ARL4C	CMTM7	174	96	968	499	908	0.732	12.00	11.80	10.94	4.61	8.86	7.65	10.55	10.12	7.25	7.08
CLIP4	CMTM7	559	486	777	717	210	0.416	9.90	11.80	10.67	4.61	8.37	7.65	11.16	10.12	12.72	7.08
CASC10	CNNM3	101	378	855	760	468	0.580	2.58	9.86	8.36	8.93	8.98	10.56	4.65	9.25	4.14	10.12
ARL6IP4	COL18A1	602	586	678	735	865	0.084	11.78	11.97	12.07	10.21	12.40	15.08	11.58	13.12	11.86	10.94
BCKDHA	COL18A1	622	454	964	186	670	0.782	11.37	11.97	10.50	10.21	12.08	15.08	10.21	13.12	12.04	10.94
CASC10	COL18A1	101	211	690	351	712	0.285	2.58	11.97	8.36	10.21	8.98	15.08	4.65	13.12	4.14	10.94
CLUH	COL18A1	192	487	795	319	357	0.590	10.59	11.97	11.89	10.21	14.13	15.08	11.53	13.12	13.62	10.94
ANK3	COL1A1	343	19	916	98	127	0.832	7.81	8.40	12.43	6.87	9.32	11.90	9.27	14.71	11.64	10.66
C1orf198	COL1A1	538	269	903	16	2	0.787	8.35	8.40	11.86	6.87	10.07	11.90	12.70	14.71	12.61	10.66
ALDH5A1	COPZ2	396	407	903	541	392	0.785	9.01	7.28	12.08	6.55	12.51	9.66	8.14	8.42	11.08	10.75
C16orf70	COQ10A	156	729	440	958	16	0.000	10.50	8.44	9.40	8.75	11.51	9.96	8.92	7.45	10.40	11.56
CASC10	COQ10A	101	490	958	803	154	0.764	2.58	8.44	8.36	8.75	8.98	9.96	4.65	7.45	4.14	11.56
CERS2	COQ10A	387	403	35	849	7	0.000	11.73	8.44	10.11	8.75	13.35	9.96	12.00	7.45	9.89	11.56
CMBL	COQ10A	373	705	905	866	416	0.524	7.17	8.44	9.51	8.75	12.25	9.96	8.09	7.45	12.16	11.56
ACBD4	CPT2	489	509	661	644	413	0.245	9.57	8.98	9.65	7.80	12.12	11.51	8.77	8.10	8.55	9.99
AKT2	CRAT	805	740	997	965	744	0.367	12.55	10.59	12.12	11.50	13.25	13.38	12.27	10.06	13.26	13.49
C6orf106	CRAT	838	695	959	796	348	0.503	12.16	10.59	13.04	11.50	13.10	13.38	12.59	10.06	14.15	13.49
CNNM3	CRAT	673	691	950	937	516	0.491	9.86	10.59	8.93	11.50	10.56	13.38	9.25	10.06	10.12	13.49
ANK3	CRISPLD2	55	13	834	165	143	0.668	7.81	12.06	12.43	7.70	9.32	9.54	9.27	13.48	11.64	10.43
ABCC1	CRLF3	563	856	895	927	522	0.372	10.87	11.08	8.72	7.83	8.42	8.17	11.69	9.01	11.54	8.02
AMPD3	CRLF3	970	635	981	752	555	0.506	11.34	11.08	9.32	7.83	7.03	8.17	9.17	9.01	12.10	8.02
ATP5C1	CROT	764	942	826	965	895	0.031	11.21	7.98	11.93	8.24	12.64	9.97	11.58	8.17	13.26	9.40
C10orf32	CROT	948	952	700	790	795	0.000	8.99	7.98	9.75	8.24	11.17	9.97	9.58	8.17	10.22	9.40
C2orf47	CROT	724	945	949	974	838	0.170	8.58	7.98	7.69	8.24	10.11	9.97	7.32	8.17	9.27	9.40
CEBPA	CROT	305	109	648	385	284	0.296	6.26	7.98	1.59	8.24	6.52	9.97	2.61	8.17	4.42	9.40
COL18A1	CRY2	305	344	818	565	752	0.477	11.97	10.52	10.21	12.46	15.08	12.61	13.12	11.41	10.94	12.79
CDKN1C	CTDSPL	96	41	796	922	242	0.444	8.97	9.18	8.57	10.62	7.84	10.65	9.89	11.52	10.60	10.37
COL18A1	CTSF	123	510	959	436	424	0.913	11.97	8.94	10.21	12.53	15.08	11.76	13.12	10.58	10.94	11.97
ARL4C	CTSS	82	142	765	401	899	0.398	12.00	14.85	10.94	6.04	8.86	10.35	10.55	12.64	7.25	7.92
AP1S2	CXCL16	499	275	992	598	540	0.915	10.84	12.71	10.40	8.06	8.09	10.43	9.86	12.24	11.74	6.89
ANKRD39	CYB561A3	691	962	769	948	536	0.155	8.37	10.92	8.42	8.67	8.37	10.60	7.01	10.33	13.32	10.53
CCDC28A	CYHR1	962	775	959	965	948	0.098	10.97	11.20	10.03	11.23	10.08	10.63	9.04	9.87	8.93	10.69
ARMC5	CYP27A1	621	279	857	629	658	0.510	9.31	10.83	9.74	10.07	10.71	14.61	8.74	12.12	10.26	10.70
COL18A1	CYP4V2	190	234	848	267	651	0.621	11.97	8.81	10.21	9.85	15.08	12.81	13.12	9.73	10.94	8.58
CFL1	CYSTM1	864	539	980	940	834	0.371	15.89	13.01	15.19	10.56	13.64	10.17	14.96	11.46	12.51	12.44
ARHGEF10	CYTH3	715	156	934	843	956	0.372	7.28	9.37	10.76	11.55	8.43	8.76	12.15	11.32	9.12	10.66
ADK	DBT	862	934	933	782	802	0.176	9.38	8.72	8.69	9.65	11.59	11.34	9.31	9.25	9.63	10.85
CA2	DBT	136	464	865	601	731	0.564	10.29	8.72	10.88	9.65	12.01	11.34	9.30	9.25	10.45	10.85
CASC10	DCAF11	101	558	900	711	424	0.665	2.58	12.42	8.36	12.33	8.98	13.56	4.65	11.24	4.14	12.31
C12orf49	DCAF4	818	707	762	898	917	0.028	9.22	8.39	9.36	8.71	8.49	8.69	10.34	7.96	7.84	9.63
C6orf106	DCAKD	977	435	737	709	172	0.251	12.16	9.59	13.04	10.84	13.10	9.98	12.59	9.22	14.15	9.24
C12orf49	DDX10	580	750	984	827	921	0.429	9.22	8.85	9.36	9.39	8.49	8.93	10.34	8.89	7.84	9.48
AMICA1	DDX39A	70	433	821	478	376	0.642	13.99	11.50	3.15	9.27	8.01	10.41	10.35	11.07	5.76	9.99
C3orf17	DENND5A	727	885	943	730	954	0.243	10.37	13.06	10.11	12.69	10.14	10.39	10.19	12.32	11.21	11.13
CNNM3	DEPDC5	982	778	969	903	881	0.172	9.86	9.96	8.93	9.57	10.56	9.89	9.25	8.78	10.12	9.10
DERL2	DHDDS	991	670	934	999	987	0.132	10.85	10.11	8.97	10.39	11.11	10.20	9.89	9.79	9.73	9.71
C16orf45	DHRS1	637	472	928	712	43	0.681	8.03	10.41	13.31	8.49	9.72	11.89	9.12	9.45	11.79	7.78
ACBD4	DHRS4-AS1	932	607	984	876	890	0.316	9.57	8.44	9.65	8.64	12.12	10.59	8.77	7.95	8.55	8.48
CMBL	DHRS4-AS1	204	849	966	968	330	0.524	7.17	8.44	9.51	8.64	12.25	10.59	8.09	7.95	12.16	8.48
ATP5G3	DHRSX	807	370	950	980	85	0.521	11.42	10.09	12.34	7.01	13.03	10.19	11.62	8.43	13.28	9.05
ARHGAP35	DHTKD1	766	395	706	975	614	0.149	10.17	10.60	13.20	9.45	12.36	13.17	11.42	9.06	11.76	10.94
C16orf45	DHTKD1	513	103	846	451	493	0.685	8.03	10.60	13.31	9.45	9.72	13.17	9.12	9.06	11.79	10.94
CHDH	DIS3L	519	309	856	789	792	0.412	6.05	9.52	10.17	10.21	12.42	9.94	7.98	9.15	9.09	11.13
CCS	DNAJC19	676	729	949	955	874	0.284	10.83	8.17	9.88	9.61	11.80	10.30	9.71	8.61	9.62	10.86
ANKRD13A	DNM1L	668	678	943	980	747	0.368	12.88	10.21	9.96	12.33	10.66	10.10	11.62	11.16	9.77	11.68
C12orf49	DNM1L	976	775	983	836	670	0.338	9.22	10.21	9.36	12.33	8.49	10.10	10.34	11.16	7.84	11.68
CDKN1A	DNM1L	425	41	651	356	120	0.302	11.53	10.21	9.70	12.33	12.43	10.10	13.29	11.16	12.99	11.68
CLIC1	DNM1L	442	39	986	953	574	0.709	14.83	10.21	8.59	12.33	11.25	10.10	13.61	11.16	10.15	11.68
CYSTM1	DPAGT1	43	502	811	782	486	0.480	13.01	10.00	10.56	9.41	10.17	10.84	11.46	10.00	12.44	9.32
DPH2	DPH3	426	856	973	985	934	0.315	9.68	10.26	9.57	9.47	9.74	9.52	9.04	9.49	10.95	11.01
ABCC1	DPYSL2	682	770	928	791	187	0.484	10.87	10.47	8.72	15.09	8.42	10.17	11.69	13.73	11.54	10.69
C12orf49	DUSP22	948	911	982	543	977	0.275	9.22	11.74	9.36	10.74	8.49	10.88	10.34	11.51	7.84	11.48
AKIP1	DYNLT1	504	522	993	913	806	0.614	8.47	11.88	9.07	9.02	8.52	10.40	8.65	11.18	9.48	10.98
C15orf57	DYNLT1	929	461	947	929	942	0.244	9.31	11.88	7.99	9.02	8.16	10.40	7.95	11.18	9.28	10.98
CDC27	DYNLT1	703	421	995	926	929	0.461	10.50	11.88	10.45	9.02	10.52	10.40	10.97	11.18	11.31	10.98
BAG3	E2F3	8	21	858	472	961	0.537	10.13	10.53	10.80	8.80	10.72	8.37	11.79	8.99	14.54	10.01
CAPN5	EBP	861	939	819	190	884	0.160	9.12	10.24	10.52	9.07	12.54	13.01	8.83	9.78	7.59	8.05
ANK3	EFEMP2	133	7	967	125	419	0.934	7.81	9.81	12.43	10.23	9.32	9.16	9.27	11.74	11.64	9.95
DHRS1	EHBP1	727	413	791	799	686	0.230	10.41	8.41	8.49	11.16	11.89	11.25	9.45	9.69	7.78	9.81
ABLIM1	EHD4	797	480	967	661	353	0.705	11.00	10.39	13.27	7.45	12.16	9.74	13.05	10.94	13.22	9.25
ATR	EHD4	897	262	966	655	686	0.563	9.59	10.39	9.64	7.45	10.15	9.74	9.93	10.94	9.68	9.25
DNAJC2	EHD4	886	522	991	894	559	0.551	9.07	10.39	8.82	7.45	9.59	9.74	9.29	10.94	10.55	9.25
E2F3	EHD4	582	307	982	932	392	0.707	10.53	10.39	8.80	7.45	8.37	9.74	8.99	10.94	10.01	9.25
ACSL1	EI24	264	607	949	589	884	0.608	16.81	9.75	10.48	11.16	15.79	13.27	14.09	11.32	15.03	12.21
CTNNAL1	EIF4A3	319	795	995	579	716	0.695	8.65	11.92	8.85	9.85	9.65	10.54	10.88	11.12	10.65	10.56
ACTN1	ELF3	393	155	967	225	432	0.934	14.08	6.50	12.23	2.97	12.55	11.45	13.65	11.39	10.75	4.44
ADAM19	ELF3	353	466	883	298	215	0.766	12.45	6.50	8.38	2.97	9.65	11.45	10.55	11.39	8.32	4.44
EHD4	ELF3	286	256	919	594	358	0.791	10.39	6.50	7.45	2.97	9.74	11.45	10.94	11.39	9.25	4.44
ADSL	ELOVL1	978	393	999	1000	531	0.494	10.59	11.88	9.07	10.42	10.19	10.69	9.86	11.54	12.92	9.80
DNAJC9	ELOVL1	449	216	986	866	946	0.566	8.39	11.88	8.43	10.42	7.86	10.69	7.47	11.54	8.46	9.80
ABCC1	EMP3	663	13	989	845	21	0.724	10.87	12.93	8.72	7.03	8.42	8.04	11.69	11.36	11.54	8.15
AEBP1	ENDOD1	261	272	950	121	326	0.900	9.24	9.80	11.07	11.39	11.28	8.75	14.79	10.75	10.88	11.57
BACE2	ENDOD1	459	579	918	647	237	0.723	8.50	9.80	7.28	11.39	8.28	8.75	10.19	10.75	9.34	11.57
C15orf57	ENDOD1	635	817	741	842	51	0.173	9.31	9.80	7.99	11.39	8.16	8.75	7.95	10.75	9.28	11.57
CALHM2	ENDOD1	543	517	998	761	361	0.836	10.76	9.80	8.09	11.39	7.57	8.75	10.13	10.75	8.90	11.57
CCDC109B	ENDOD1	636	814	984	745	473	0.621	10.24	9.80	5.46	11.39	6.05	8.75	8.12	10.75	6.87	11.57
CTSK	ENDOD1	500	626	666	298	321	0.269	9.37	9.80	6.74	11.39	8.27	8.75	10.25	10.75	9.04	11.57
EFEMP2	ENDOD1	371	405	959	527	816	0.747	9.81	9.80	10.23	11.39	9.16	8.75	11.74	10.75	9.95	11.57
DHRS12	ENDOG	349	537	656	769	324	0.215	10.84	7.31	8.06	7.00	9.70	8.46	8.40	5.53	8.68	9.78
ABCC1	ENTPD1	148	779	917	743	630	0.508	10.87	12.63	8.72	10.25	8.42	9.37	11.69	11.59	11.54	9.95
CCND3	ENTPD1	963	780	853	596	876	0.165	14.09	12.63	11.74	10.25	9.88	9.37	12.72	11.59	9.70	9.95
ENDOD1	ENTPD1	427	852	966	596	441	0.708	9.80	12.63	11.39	10.25	8.75	9.37	10.75	11.59	11.57	9.95
CYSTM1	ENTPD6	33	170	981	758	852	0.657	13.01	10.91	10.56	12.88	10.17	11.71	11.46	11.62	12.44	11.22
EIF5	EPAS1	440	263	996	515	628	0.920	12.06	9.57	13.31	12.89	13.94	13.73	12.84	17.49	13.46	12.61
DEPDC5	EPHX1	790	1	612	653	783	0.056	9.96	9.02	9.57	12.02	9.89	15.05	8.78	12.35	9.10	12.04
ACSL5	EPT1	959	85	898	839	775	0.290	10.94	8.79	8.33	10.37	12.76	11.34	11.40	9.83	8.25	10.43
AQP3	ERLIN1	29	297	967	669	762	0.719	9.85	11.72	4.58	8.94	12.66	12.57	11.45	10.24	7.94	9.38
ACOT13	ESR1	694	553	784	201	141	0.445	9.36	7.01	9.23	4.99	10.76	10.12	8.25	7.68	10.11	8.20
ALAD	ESR1	702	612	951	679	395	0.655	10.83	7.01	12.12	4.99	13.07	10.12	10.56	7.68	10.62	8.20
ALDH5A1	ESR1	385	464	987	298	906	0.771	9.01	7.01	12.08	4.99	12.51	10.12	8.14	7.68	11.08	8.20
CBR4	ESR1	879	828	966	475	638	0.509	9.23	7.01	9.36	4.99	11.24	10.12	8.78	7.68	10.01	8.20
CLU	ESR1	143	112	412	727	691	0.000	12.76	7.01	18.59	4.99	16.43	10.12	14.68	7.68	10.77	8.20
CMBL	ESR1	88	342	996	565	629	0.895	7.17	7.01	9.51	4.99	12.25	10.12	8.09	7.68	12.16	8.20
ANGPTL4	ETS2	241	348	935	616	607	0.758	6.89	12.70	9.56	12.33	12.55	13.86	9.98	14.23	9.43	13.09
CCND3	ETV6	912	844	903	409	578	0.394	14.09	12.27	11.74	8.78	9.88	10.00	12.72	11.12	9.70	9.53
ATIC	EXOC6	31	904	977	751	245	0.626	10.39	10.72	10.72	9.02	10.81	9.27	10.26	9.43	11.27	10.49
ALDH5A1	FAAH	316	428	892	984	804	0.436	9.01	9.20	12.08	10.68	12.51	11.40	8.14	9.13	11.08	9.25
AGPAT6	FADD	167	592	903	768	594	0.579	12.03	9.12	10.91	4.83	11.92	6.79	11.42	5.58	12.02	6.84
EHD4	FADD	391	354	946	716	293	0.784	10.39	9.12	7.45	4.83	9.74	6.79	10.94	5.58	9.25	6.84
ACSS2	FADS2	290	302	962	928	474	0.710	11.19	9.78	10.40	12.88	12.50	12.28	12.02	10.85	12.83	8.76
AGL	FAM13A	788	772	883	961	65	0.294	9.09	9.97	9.71	10.53	11.84	11.26	9.35	10.10	13.50	9.99
BCKDHB	FAM13A	550	233	826	972	391	0.464	7.73	9.97	9.20	10.53	11.25	11.26	8.39	10.10	8.89	9.99
ESR1	FAM13A	830	818	740	491	495	0.240	7.01	9.97	4.99	10.53	10.12	11.26	7.68	10.10	8.20	9.99
CMBL	FAM162A	467	939	841	893	382	0.341	7.17	9.68	9.51	10.83	12.25	11.58	8.09	9.47	12.16	11.30
ACSS2	FAM213A	208	382	976	970	721	0.607	11.19	7.58	10.40	12.66	12.50	12.03	12.02	9.31	12.83	10.57
ADA	FAM49B	17	147	983	619	572	0.871	10.05	13.43	6.77	11.32	7.50	9.50	8.07	10.84	8.35	10.69
AMPD3	FAM49B	950	549	941	847	343	0.464	11.34	13.43	9.32	11.32	7.03	9.50	9.17	10.84	12.10	10.69
ARHGAP30	FAM49B	935	93	936	933	668	0.354	14.26	13.43	5.78	11.32	8.61	9.50	11.40	10.84	7.30	10.69
CMTM7	FAM49B	755	103	995	956	724	0.522	11.80	13.43	4.61	11.32	7.65	9.50	10.12	10.84	7.08	10.69
AKIRIN1	FAM89A	833	387	985	797	340	0.655	11.35	8.31	11.27	6.69	11.23	7.82	10.82	8.85	10.81	7.09
ETS2	FAM89A	735	365	972	733	688	0.616	12.70	8.31	12.33	6.69	13.86	7.82	14.23	8.85	13.09	7.09
AEBP1	FAR1	45	49	978	457	458	0.956	9.24	11.68	11.07	11.30	11.28	8.50	14.79	11.70	10.88	10.98
ARHGDIB	FAR1	770	218	999	792	883	0.525	16.50	11.68	8.63	11.30	10.52	8.50	13.01	11.70	10.22	10.98
C1orf54	FAR1	367	132	947	694	786	0.654	6.17	11.68	6.78	11.30	6.32	8.50	7.28	11.70	7.21	10.98
CALHM2	FAR1	548	434	998	746	853	0.672	10.76	11.68	8.09	11.30	7.57	8.50	10.13	11.70	8.90	10.98
CMTM3	FAR1	829	254	1000	843	767	0.530	11.85	11.68	6.96	11.30	8.18	8.50	10.90	11.70	8.39	10.98
CMTM7	FAR1	633	342	995	771	737	0.669	11.80	11.68	4.61	11.30	7.65	8.50	10.12	11.70	7.08	10.98
ALDOC	FASN	788	639	488	760	117	0.000	10.55	10.52	15.67	13.89	11.26	14.58	8.41	13.86	7.43	11.66
AGL	FAXDC2	47	427	979	745	536	0.818	9.09	11.01	9.71	10.92	11.84	12.04	9.35	11.36	13.50	9.41
C16orf45	FAXDC2	101	99	808	758	184	0.487	8.03	11.01	13.31	10.92	9.72	12.04	9.12	11.36	11.79	9.41
C8orf82	FAXDC2	109	552	909	765	351	0.659	9.32	11.01	9.05	10.92	11.26	12.04	8.99	11.36	9.62	9.41
EBP	FAXDC2	138	283	806	149	774	0.475	10.24	11.01	9.07	10.92	13.01	12.04	9.78	11.36	8.05	9.41
APH1B	FBLIM1	42	269	832	323	438	0.664	10.85	5.78	9.34	5.86	7.64	8.75	9.53	11.52	8.68	8.50
DLG3	FBLIM1	478	53	982	420	763	0.833	8.60	5.78	11.54	5.86	7.51	8.75	9.66	11.52	7.57	8.50
DPYSL2	FBLIM1	273	509	934	563	967	0.615	10.47	5.78	15.09	5.86	10.17	8.75	13.73	11.52	10.69	8.50
CROT	FBXO22	945	931	892	940	905	0.000	7.98	8.95	8.24	8.35	9.97	9.85	8.17	8.67	9.40	9.40
BNIP3	FBXO7	74	499	924	906	889	0.451	9.50	14.15	11.44	11.33	12.07	11.96	9.81	12.13	12.63	10.77
COQ10A	FBXO7	108	593	632	879	53	0.151	8.44	14.15	8.75	11.33	9.96	11.96	7.45	12.13	11.56	10.77
ABCC1	FGD3	257	400	959	578	210	0.879	10.87	14.47	8.72	5.96	8.42	8.36	11.69	10.46	11.54	6.94
CHPT1	FGFR1OP	598	455	882	646	735	0.524	11.93	9.56	10.85	9.43	11.91	10.88	10.99	8.99	10.38	9.06
DCTPP1	FLII	733	736	997	956	786	0.389	9.47	13.51	8.88	11.75	8.80	12.14	8.20	13.30	9.94	14.49
CASC10	FLJ37453	0	0	0	0	0	0.000	2.58	0.00	8.36	0.00	8.98	0.00	4.65	0.00	4.14	0.00
ELF3	FNDC3B	314	192	950	451	65	0.900	6.50	11.71	2.97	7.58	11.45	11.99	11.39	12.19	4.44	11.58
CISH	FOXO1	686	531	731	304	759	0.238	10.79	10.46	4.33	8.99	11.06	10.80	10.54	11.48	10.12	13.10
CTSL	FRMD8	58	903	937	630	917	0.399	10.58	11.17	10.41	9.52	12.48	9.99	12.87	11.07	11.25	10.02
ANK3	FSTL1	245	23	951	348	215	0.902	7.81	8.75	12.43	10.39	9.32	11.17	9.27	14.56	11.64	11.59
FAR1	FSTL1	447	283	970	692	682	0.753	11.68	8.75	11.30	10.39	8.50	11.17	11.70	14.56	10.98	11.59
COA6	FTL	569	215	884	865	750	0.426	8.37	18.59	8.80	16.19	8.48	17.22	6.97	18.59	10.03	14.18
C19orf66	FURIN	65	869	615	478	127	0.172	10.74	13.70	10.46	11.52	12.95	14.78	10.18	13.13	7.86	12.28
C11orf71	FXYD1	101	108	96	50	47	0.000	0.00	6.66	0.00	11.46	0.00	12.00	0.00	9.40	0.00	13.11
FOLR2	GALC	331	399	765	613	622	0.412	8.67	10.84	4.81	10.20	6.89	9.28	8.58	10.85	7.05	9.67
ALKBH7	GALE	942	723	944	844	599	0.334	10.62	9.35	9.79	9.28	11.53	11.48	9.51	9.67	11.11	7.74
ADH4	GAMT	101	108	814	340	42	0.628	4.44	8.45	0.89	10.48	14.79	13.88	2.51	6.91	5.00	13.72
ALDH2	GAMT	88	333	771	516	759	0.405	12.31	8.45	14.12	10.48	15.62	13.88	13.79	6.91	13.17	13.72
ALDH5A1	GAMT	547	381	868	457	831	0.547	9.01	8.45	12.08	10.48	12.51	13.88	8.14	6.91	11.08	13.72
CLU	GAMT	97	226	427	789	605	0.000	12.76	8.45	18.59	10.48	16.43	13.88	14.68	6.91	10.77	13.72
CNNM3	GAMT	714	735	784	689	515	0.241	9.86	8.45	8.93	10.48	10.56	13.88	9.25	6.91	10.12	13.72
C12orf49	GARS	643	837	998	875	972	0.333	9.22	11.27	9.36	11.79	8.49	11.09	10.34	11.60	7.84	11.56
ABCC1	GAS7	43	976	976	773	10	0.578	10.87	13.36	8.72	14.35	8.42	7.49	11.69	11.95	11.54	9.20
B3GALT4	GAS7	983	873	981	643	740	0.344	10.45	13.36	6.91	14.35	5.94	7.49	7.94	11.95	6.97	9.20
ARHGDIB	GBAS	705	544	880	922	405	0.446	16.50	10.10	8.63	11.21	10.52	9.12	13.01	10.37	10.22	13.96
ACACB	GCAT	196	279	603	498	3	0.206	9.42	7.68	10.48	9.53	13.66	10.69	10.47	7.04	14.55	9.20
BACE1	GCAT	112	649	692	636	256	0.241	8.44	7.68	11.77	9.53	11.13	10.69	10.66	7.04	10.53	9.20
CMBL	GCAT	536	818	952	776	644	0.517	7.17	7.68	9.51	9.53	12.25	10.69	8.09	7.04	12.16	9.20
C11orf54	GCDH	216	728	965	963	740	0.465	9.55	9.95	8.73	9.16	12.38	12.05	9.43	8.73	10.70	10.20
C16orf45	GCDH	701	232	665	351	700	0.165	8.03	9.95	13.31	9.16	9.72	12.05	9.12	8.73	11.79	10.20
CAPN5	GCDH	634	334	917	261	378	0.767	9.12	9.95	10.52	9.16	12.54	12.05	8.83	8.73	7.59	10.20
ATP5O	GINM1	859	701	991	950	713	0.370	11.11	10.33	12.41	9.87	12.08	10.14	11.48	10.92	13.30	10.98
COQ9	GINM1	952	887	901	684	528	0.302	9.74	10.33	10.72	9.87	11.79	10.14	9.62	10.92	12.54	10.98
ADA	GIT2	23	270	943	493	769	0.751	10.05	12.43	6.77	11.20	7.50	10.65	8.07	11.16	8.35	10.79
ANAPC11	GJB1	0	213	789	561	0	0.000	10.49	3.11	10.76	7.86	11.07	13.76	10.08	2.71	11.53	1.73
AURKAIP1	GJB1	0	197	617	523	0	0.000	11.71	3.11	11.45	7.86	12.09	13.76	10.52	2.71	12.16	1.73
C6orf106	GJB1	0	129	864	265	0	0.000	12.16	3.11	13.04	7.86	13.10	13.76	12.59	2.71	14.15	1.73
DHRS3	GJB1	0	57	672	599	0	0.000	10.29	3.11	9.60	7.86	13.74	13.76	11.45	2.71	11.36	1.73
BRCC3	GLA	529	609	886	434	568	0.669	8.70	11.26	8.85	7.27	8.86	8.60	8.05	9.60	9.78	8.64
BAG3	GLIPR2	1	441	687	275	46	0.374	10.13	13.44	10.80	8.00	10.72	7.51	11.79	11.39	14.54	8.06
C15orf57	GLIPR2	914	454	716	823	208	0.216	9.31	13.44	7.99	8.00	8.16	7.51	7.95	11.39	9.28	8.06
C1orf27	GLRX3	917	632	946	947	997	0.172	8.86	9.68	9.03	9.56	10.61	10.13	9.78	9.95	9.76	10.61
ACBD4	GLRX5	93	855	818	763	717	0.237	9.57	11.37	9.65	10.61	12.12	11.38	8.77	9.48	8.55	11.56
CEBPA	GLRX5	43	210	698	589	121	0.351	6.26	11.37	1.59	10.61	6.52	11.38	2.61	9.48	4.42	11.56
ECHS1	GLYCTK	612	594	965	962	228	0.596	10.75	10.18	12.15	5.58	14.92	13.73	10.96	7.67	12.67	7.62
ATP6V1H	GMFG	851	432	913	815	705	0.391	10.60	13.33	12.47	6.14	9.57	8.21	10.43	10.84	10.79	7.39
FAR1	GMFG	845	302	994	740	816	0.537	11.68	13.33	11.30	6.14	8.50	8.21	11.70	10.84	10.98	7.39
GALC	GMFG	539	551	832	745	758	0.367	10.84	13.33	10.20	6.14	9.28	8.21	10.85	10.84	9.67	7.39
B4GALT4	GMPR2	685	741	987	638	884	0.500	10.28	11.93	8.55	11.17	9.91	11.02	9.59	10.82	8.86	10.46
BECN1	GNA12	196	49	985	889	927	0.562	11.06	11.18	9.93	12.20	9.52	10.58	10.02	11.64	11.41	10.36
ENOPH1	GNA12	520	190	978	923	879	0.545	9.17	11.18	11.42	12.20	9.29	10.58	9.47	11.64	9.39	10.36
C1RL	GNAO1	5	501	901	412	96	0.801	12.07	7.82	7.72	14.47	13.63	11.06	11.51	6.02	9.57	7.57
C8orf82	GNAO1	539	750	731	478	165	0.327	9.32	7.82	9.05	14.47	11.26	11.06	8.99	6.02	9.62	7.57
ACOT13	GNE	622	758	967	947	825	0.358	9.36	9.17	9.23	9.39	10.76	12.62	8.25	9.41	10.11	9.87
CAT	GNE	609	301	953	901	775	0.513	13.04	9.17	10.23	9.39	14.24	12.62	12.43	9.41	12.34	9.87
ARHGEF2	GNPDA1	730	881	908	234	627	0.447	13.10	10.42	12.37	10.28	9.42	9.36	13.07	9.78	10.25	10.41
CAPZA1	GNPTAB	493	800	988	824	367	0.664	13.33	10.92	10.67	11.47	11.79	9.42	12.42	11.07	10.85	10.56
CCDC109B	GNPTAB	912	493	940	896	456	0.476	10.24	10.92	5.46	11.47	6.05	9.42	8.12	11.07	6.87	10.56
CD53	GNPTAB	260	581	945	759	321	0.720	15.30	10.92	8.05	11.47	8.96	9.42	12.14	11.07	7.24	10.56
CRLF3	GNPTAB	698	849	980	919	771	0.342	11.08	10.92	7.83	11.47	8.17	9.42	9.01	11.07	8.02	10.56
CRYBG3	GNPTAB	878	384	969	930	325	0.534	7.27	10.92	7.21	11.47	7.93	9.42	9.36	11.07	10.34	10.56
CTSC	GNPTAB	685	595	997	880	554	0.637	12.74	10.92	6.93	11.47	10.18	9.42	12.96	11.07	9.13	10.56
GLA	GPATCH4	667	544	914	468	891	0.527	11.26	9.39	7.27	10.09	8.60	9.77	9.60	9.35	8.64	11.51
ATP1B3	GPCPD1	459	620	779	640	567	0.395	11.47	13.13	11.55	11.10	9.07	10.29	12.73	12.80	10.33	11.02
CCDC109B	GPD2	880	469	931	869	472	0.487	10.24	10.15	5.46	10.51	6.05	8.40	8.12	10.24	6.87	11.19
GMFG	GPD2	302	554	889	830	370	0.586	13.33	10.15	6.14	10.51	8.21	8.40	10.84	10.24	7.39	11.19
AKT2	GPER1	382	167	651	239	693	0.227	12.55	8.66	12.12	9.21	13.25	10.27	12.27	8.09	13.26	7.12
ANAPC11	GPER1	509	618	443	531	776	0.000	10.49	8.66	10.76	9.21	11.07	10.27	10.08	8.09	11.53	7.12
ARHGAP35	GPER1	328	390	552	467	639	0.078	10.17	8.66	13.20	9.21	12.36	10.27	11.42	8.09	11.76	7.12
C16orf70	GPER1	850	20	645	676	308	0.145	10.50	8.66	9.40	9.21	11.51	10.27	8.92	8.09	10.40	7.12
CAPN5	GPER1	1	155	976	187	836	0.784	9.12	8.66	10.52	9.21	12.54	10.27	8.83	8.09	7.59	7.12
CASC10	GPER1	101	761	972	576	592	0.730	2.58	8.66	8.36	9.21	8.98	10.27	4.65	8.09	4.14	7.12
COQ10A	GPER1	8	286	922	556	346	0.816	8.44	8.66	8.75	9.21	9.96	10.27	7.45	8.09	11.56	7.12
GCAT	GPER1	12	455	830	474	567	0.626	7.68	8.66	9.53	9.21	10.69	10.27	7.04	8.09	9.20	7.12
GLO1	GPER1	100	481	487	471	674	0.000	10.45	8.66	11.85	9.21	11.69	10.27	11.53	8.09	12.22	7.12
GLRX5	GPER1	38	483	729	564	615	0.368	11.37	8.66	10.61	9.21	11.38	10.27	9.48	8.09	11.56	7.12
ALDH18A1	GPR107	110	971	965	828	864	0.351	9.40	11.53	9.84	11.86	10.83	11.22	9.86	12.03	8.65	11.53
C12orf49	GPR107	953	745	985	914	854	0.237	9.22	11.53	9.36	11.86	8.49	11.22	10.34	12.03	7.84	11.53
GPER1	GPS1	43	225	860	633	540	0.633	8.66	11.61	9.21	12.11	10.27	12.22	8.09	11.55	7.12	12.48
CMBL	GPT	507	439	913	766	314	0.690	7.17	5.41	9.51	7.40	12.25	12.95	8.09	4.50	12.16	10.46
CASC10	GPX4	101	587	919	581	492	0.754	2.58	12.18	8.36	13.13	8.98	13.36	4.65	12.60	4.14	13.04
DHTKD1	GPX4	137	455	841	800	144	0.532	10.60	12.18	9.45	13.13	13.17	13.36	9.06	12.60	10.94	13.04
ENOSF1	GRB10	3	192	704	636	224	0.340	8.76	11.26	8.48	11.67	11.94	11.85	10.47	11.40	9.61	12.16
CHST15	GRK5	513	822	965	325	249	0.762	13.55	10.32	10.43	9.23	10.27	9.60	11.18	12.38	10.36	9.63
FAM89A	GSKIP	932	195	990	543	361	0.743	8.31	9.52	6.69	9.16	7.82	9.80	8.85	8.16	7.09	8.67
AKAP7	GSN	31	145	673	629	196	0.281	8.02	13.17	9.16	12.96	10.03	11.63	7.63	14.88	9.26	14.36
FTL	GSS	549	76	933	915	802	0.483	18.59	10.38	16.19	10.31	17.22	11.14	18.59	10.26	14.18	10.01
ACADSB	GSTZ1	508	770	971	971	403	0.568	8.48	8.78	10.49	8.02	14.23	11.80	9.76	7.01	11.81	9.99
FAM89A	GTF2B	915	430	987	811	604	0.559	8.31	10.55	6.69	8.96	7.82	9.70	8.85	9.38	7.09	9.52
ANK3	GUCY1A3	481	589	975	433	430	0.905	7.81	6.77	12.43	8.59	9.32	8.17	9.27	9.91	11.64	8.44
C12orf49	GYG1	643	812	992	754	836	0.462	9.22	13.35	9.36	10.41	8.49	9.30	10.34	11.04	7.84	14.29
ADA	H2AFY	47	336	995	251	752	0.864	10.05	13.38	6.77	11.42	7.50	11.16	8.07	12.68	8.35	11.90
CDC42SE1	H2AFY	989	897	996	612	975	0.256	14.50	13.38	11.10	11.42	11.08	11.16	12.81	12.68	10.91	11.90
GLTP	H2AFY	965	282	995	977	951	0.293	11.32	13.38	10.36	11.42	9.61	11.16	10.45	12.68	9.97	11.90
FAM208A	H2AFZ	889	794	905	731	923	0.150	10.60	12.20	10.41	11.60	10.20	10.48	10.81	11.74	9.96	11.06
GRB10	HAAO	278	38	628	426	40	0.256	11.26	8.47	11.67	4.43	11.85	12.90	11.40	6.93	12.16	6.34
ALDH6A1	HAGH	197	48	917	905	459	0.631	8.42	11.71	12.86	11.55	13.70	12.58	9.40	10.14	10.84	12.09
BDH2	HAGH	168	140	975	877	787	0.618	7.37	11.71	9.22	11.55	10.42	12.58	9.42	10.14	8.99	12.09
CMBL	HAGH	643	607	987	825	562	0.655	7.17	11.71	9.51	11.55	12.25	12.58	8.09	10.14	12.16	12.09
ESR1	HAGH	28	602	930	305	182	0.809	7.01	11.71	4.99	11.55	10.12	12.58	7.68	10.14	8.20	12.09
CNNM3	HDGF	465	892	948	271	725	0.588	9.86	13.20	8.93	12.30	10.56	13.58	9.25	13.07	10.12	13.43
AXL	HECA	258	172	874	834	599	0.531	6.61	12.22	10.44	10.30	8.53	9.84	11.57	11.54	10.02	11.29
BLVRA	HEG1	271	328	998	755	742	0.748	10.54	9.15	9.62	10.18	6.99	9.12	10.47	13.23	10.30	10.30
CPEB2	HIBADH	727	714	780	929	459	0.200	9.89	8.63	10.36	9.43	10.48	12.28	10.01	9.38	9.92	11.73
ELF3	HIF1A	172	198	936	483	265	0.872	6.50	13.10	2.97	10.92	11.45	11.19	11.39	13.28	4.44	10.20
C16orf70	HINT2	297	529	837	978	66	0.491	10.50	8.95	9.40	8.87	11.51	11.08	8.92	8.45	10.40	9.68
AAK1	HIP1R	890	26	823	171	736	0.366	9.20	10.69	12.16	13.04	7.27	11.62	7.95	11.18	9.38	9.71
C6orf203	HIST1H2BK	632	606	767	632	199	0.349	7.69	12.16	8.35	6.41	9.24	10.86	6.94	9.74	9.56	7.55
ARHGEF2	HK1	629	933	976	600	199	0.621	13.10	12.83	12.37	13.57	9.42	9.23	13.07	12.57	10.25	13.74
CD53	HK1	545	572	987	924	651	0.628	15.30	12.83	8.05	13.57	8.96	9.23	12.14	12.57	7.24	13.74
CDC42SE1	HK1	419	697	980	864	550	0.654	14.50	12.83	11.10	13.57	11.08	9.23	12.81	12.57	10.91	13.74
ABCC1	HLA-DMA	886	146	732	638	27	0.279	10.87	11.56	8.72	6.73	8.42	8.90	11.69	12.02	11.54	8.66
ARL4C	HLA-DMA	938	91	917	767	820	0.332	12.00	11.56	10.94	6.73	8.86	8.90	10.55	12.02	7.25	8.66
BASP1	HLA-DOA	34	139	793	114	547	0.562	14.45	10.15	14.01	4.67	8.06	6.87	10.34	9.91	6.68	6.18
BASP1	HLA-DPA1	7	75	926	181	645	0.779	14.45	12.85	14.01	8.10	8.06	10.06	10.34	13.95	6.68	9.82
HK1	HLA-DPA1	262	180	939	605	75	0.826	12.83	12.85	13.57	8.10	9.23	10.06	12.57	13.95	13.74	9.82
BASP1	HLA-DPB1	8	49	847	110	657	0.616	14.45	12.12	14.01	7.57	8.06	9.30	10.34	12.84	6.68	8.93
HK1	HLA-DPB1	229	169	832	520	81	0.654	12.83	12.12	13.57	7.57	9.23	9.30	12.57	12.84	13.74	8.93
BASP1	HLA-DRA	13	75	957	226	756	0.786	14.45	14.02	14.01	8.60	8.06	10.90	10.34	15.51	6.68	10.70
ARL4C	HLA-DRB6	475	83	447	140	216	0.000	12.00	7.83	10.94	1.71	8.86	4.30	10.55	6.79	7.25	4.83
BASP1	HLA-DRB6	67	75	651	139	161	0.302	14.45	7.83	14.01	1.71	8.06	4.30	10.34	6.79	6.68	4.83
ARL4C	HLA-E	69	49	827	598	808	0.451	12.00	17.73	10.94	12.86	8.86	14.18	10.55	17.05	7.25	13.16
HK1	HLA-E	485	100	947	405	290	0.894	12.83	17.73	13.57	12.86	9.23	14.18	12.57	17.05	13.74	13.16
CAPN5	HMGCL	45	530	960	483	825	0.743	9.12	10.43	10.52	9.21	12.54	13.52	8.83	9.80	7.59	10.64
COL18A1	HMGCL	745	583	940	298	567	0.682	11.97	10.43	10.21	9.21	15.08	13.52	13.12	9.80	10.94	10.64
GAMT	HMGCL	315	607	980	619	737	0.729	8.45	10.43	10.48	9.21	13.88	13.52	6.91	9.80	13.72	10.64
GNAO1	HMGCL	121	685	713	324	793	0.227	7.82	10.43	14.47	9.21	11.06	13.52	6.02	9.80	7.57	10.64
ARPC1B	HMGN4	654	493	982	947	740	0.543	13.85	10.68	7.87	8.72	10.77	8.50	12.41	10.09	8.85	10.07
CCND2	HMHA1	463	549	878	678	863	0.461	11.18	15.06	11.92	8.97	7.97	10.04	11.63	12.50	8.32	8.50
CDKN1A	HMOX2	295	52	792	270	490	0.584	11.53	11.09	9.70	11.58	12.43	11.59	13.29	10.45	12.99	9.99
ADA	HN1	12	59	989	458	659	0.898	10.05	12.51	6.77	10.72	7.50	9.27	8.07	9.83	8.35	10.96
C8orf82	HNF1A	706	374	892	889	855	0.309	9.32	5.33	9.05	5.92	11.26	11.10	8.99	3.12	9.62	4.51
FOXRED1	HNF1A	636	901	731	894	406	0.163	9.86	5.33	10.69	5.92	10.99	11.10	8.59	3.12	10.03	4.51
CIZ1	HS1BP3	88	852	903	999	996	0.227	11.94	11.07	12.28	9.06	10.87	10.42	11.93	10.06	12.37	9.53
AGL	HSBP1L1	407	645	683	874	208	0.202	9.09	8.04	9.71	7.51	11.84	10.03	9.35	8.31	13.50	7.91
DHRS4-AS1	HSBP1L1	675	320	775	878	239	0.325	8.44	8.04	8.64	7.51	10.59	10.03	7.95	8.31	8.48	7.91
GAMT	HSBP1L1	749	468	863	544	611	0.524	8.45	8.04	10.48	7.51	13.88	10.03	6.91	8.31	13.72	7.91
BNIP3	HSD17B10	632	368	915	743	894	0.446	9.50	10.69	11.44	9.29	12.07	12.48	9.81	10.06	12.63	10.76
C16orf45	HSD17B8	575	272	940	457	40	0.843	8.03	8.30	13.31	6.81	9.72	10.24	9.12	7.53	11.79	8.88
C16orf70	HSD17B8	88	170	595	857	57	0.142	10.50	8.30	9.40	6.81	11.51	10.24	8.92	7.53	10.40	8.88
CMBL	HSD17B8	399	519	969	777	638	0.721	7.17	8.30	9.51	6.81	12.25	10.24	8.09	7.53	12.16	8.88
COL18A1	HSD17B8	83	452	928	285	683	0.764	11.97	8.30	10.21	6.81	15.08	10.24	13.12	7.53	10.94	8.88
ABHD6	HSDL2	844	28	992	940	234	0.592	8.61	11.41	9.93	10.71	11.20	12.79	8.06	10.38	8.20	12.91
GYG1	HYAL2	974	558	978	584	559	0.619	13.35	9.58	10.41	9.07	9.30	10.20	11.04	13.24	14.29	10.07
CLCC1	HYOU1	904	858	947	826	954	0.127	8.19	11.02	8.71	11.69	9.20	12.85	8.99	12.02	10.15	10.36
ERP44	HYOU1	396	874	999	953	999	0.335	11.87	11.02	9.32	11.69	11.67	12.85	11.34	12.02	10.47	10.36
APH1B	ICAM2	13	299	945	490	421	0.890	10.85	10.62	9.34	6.48	7.64	6.26	9.53	9.55	8.68	8.59
ARPC2	ICAM2	65	307	981	784	611	0.764	14.63	10.62	12.36	6.48	11.91	6.26	13.74	9.55	13.04	8.59
GNB4	ICAM2	34	602	993	702	839	0.664	8.68	10.62	6.32	6.48	6.30	6.26	8.90	9.55	7.31	8.59
ENDOD1	ID3	200	296	979	760	63	0.828	9.80	8.83	11.39	9.69	8.75	9.88	10.75	11.92	11.57	10.25
GPD1L	ID3	746	39	948	725	140	0.660	9.40	8.83	11.02	9.69	7.49	9.88	10.99	11.92	13.46	10.25
ALDOC	IDI1	17	676	840	841	260	0.422	10.55	11.68	15.67	11.88	11.26	12.37	8.41	11.45	7.43	12.33
ACOX1	IDNK	939	656	997	845	176	0.524	12.20	8.98	10.77	8.44	13.29	9.67	10.86	6.55	11.83	6.39
FAM13A	IDNK	570	304	915	853	855	0.441	9.97	8.98	10.53	8.44	11.26	9.67	10.10	6.55	9.99	6.39
ATP1A1	IER3	684	206	828	19	28	0.564	12.75	10.97	14.66	6.57	12.79	9.72	15.05	10.59	12.75	7.57
C12orf49	IER3	511	486	906	5	464	0.806	9.22	10.97	9.36	6.57	8.49	9.72	10.34	10.59	7.84	7.57
DNM1L	IER3	538	123	750	140	291	0.481	10.21	10.97	12.33	6.57	10.10	9.72	11.16	10.59	11.68	7.57
ELMO2	IER3	588	188	839	394	79	0.634	12.30	10.97	12.11	6.57	10.36	9.72	11.56	10.59	11.39	7.57
ENDOD1	IER3	126	443	576	2	424	0.152	9.80	10.97	11.39	6.57	8.75	9.72	10.75	10.59	11.57	7.57
HN1	IER3	317	79	870	77	512	0.734	12.51	10.97	10.72	6.57	9.27	9.72	9.83	10.59	10.96	7.57
ERO1L	IER3IP1	692	975	915	948	857	0.141	12.28	9.14	10.03	8.68	11.56	10.63	10.78	10.06	9.95	10.86
ENTPD1	IER5	17	505	660	190	257	0.318	12.63	11.08	10.25	9.96	9.37	9.06	11.59	11.08	9.95	11.45
GLIPR2	IER5	16	139	796	397	157	0.592	13.44	11.08	8.00	9.96	7.51	9.06	11.39	11.08	8.06	11.45
ELF3	IER5L	229	138	977	19	146	0.954	6.50	8.87	2.97	7.61	11.45	8.10	11.39	7.89	4.44	6.97
ELF3	IFFO2	111	425	889	765	100	0.645	6.50	9.53	2.97	10.23	11.45	9.37	11.39	9.88	4.44	9.69
GLRX	IFT43	290	834	907	575	533	0.593	11.63	7.81	9.51	8.71	11.75	9.83	10.95	8.81	13.06	8.46
C10orf54	IFT57	458	102	970	771	615	0.747	16.77	8.89	10.76	9.92	9.18	7.96	12.82	11.45	10.07	8.97
CHST15	IFT57	552	986	901	599	738	0.407	13.55	8.89	10.43	9.92	10.27	7.96	11.18	11.45	10.36	8.97
CMTM3	IFT57	807	156	991	423	597	0.780	11.85	8.89	6.96	9.92	8.18	7.96	10.90	11.45	8.39	8.97
CA2	IGF1	303	40	789	51	36	0.578	10.29	5.41	10.88	5.91	12.01	11.82	9.30	9.51	10.45	9.58
FURIN	IGFBP4	4	645	872	344	302	0.671	13.70	9.15	11.52	10.00	14.78	15.82	13.13	14.91	12.28	12.06
ANK3	IGFBP7	258	3	996	73	146	0.992	7.81	10.42	12.43	11.28	9.32	12.67	9.27	14.10	11.64	11.84
ENDOD1	IGFBP7	494	491	982	420	654	0.887	9.80	10.42	11.39	11.28	8.75	12.67	10.75	14.10	11.57	11.84
ABCC1	IKZF1	853	70	885	765	156	0.461	10.87	12.91	8.72	4.65	8.42	7.92	11.69	10.14	11.54	6.36
BASP1	IKZF1	663	154	898	554	785	0.545	14.45	12.91	14.01	4.65	8.06	7.92	10.34	10.14	6.68	6.36
BLVRA	IKZF1	700	287	938	581	608	0.681	10.54	12.91	9.62	4.65	6.99	7.92	10.47	10.14	10.30	6.36
FAR1	IKZF1	908	300	979	839	768	0.451	11.68	12.91	11.30	4.65	8.50	7.92	11.70	10.14	10.98	6.36
ABR	IL10RA	864	497	992	788	795	0.510	12.54	13.01	15.13	6.73	9.16	8.99	13.01	11.33	10.48	7.68
ACYP2	IL13RA1	346	362	937	935	401	0.656	8.11	12.26	10.27	8.64	8.97	12.92	7.23	12.22	11.38	11.50
BLVRA	IL16	721	195	963	638	486	0.747	10.54	12.89	9.62	5.64	6.99	7.99	10.47	10.96	10.30	8.18
CARHSP1	IL17RC	758	764	795	372	481	0.329	10.68	8.32	9.59	9.70	11.58	12.40	11.15	9.91	8.62	10.60
COL18A1	IL17RC	467	577	702	544	441	0.344	11.97	8.32	10.21	9.70	15.08	12.40	13.12	9.91	10.94	10.60
ATG101	IL4R	101	108	96	50	47	0.000	0.00	14.13	0.00	8.99	0.00	13.12	0.00	13.61	0.00	9.39
C2	ILVBL	689	581	952	888	383	0.575	8.88	9.84	6.16	10.35	14.70	11.74	11.67	10.22	7.04	9.95
EIF4EBP2	IMPA1	819	747	608	873	636	0.000	12.86	9.06	11.96	9.48	12.87	11.02	12.98	8.86	13.24	9.44
ATP5S	ING1	644	796	771	419	469	0.335	8.10	10.59	7.96	8.50	7.80	9.47	7.34	8.94	9.73	8.97
EBAG9	ING1	707	958	852	570	816	0.232	8.78	10.59	9.32	8.50	9.77	9.47	8.98	8.94	10.15	8.97
GPER1	ING1	279	317	762	129	406	0.524	8.66	10.59	9.21	8.50	10.27	9.47	8.09	8.94	7.12	8.97
ADA	INPP4A	433	50	987	649	833	0.733	10.05	11.92	6.77	11.78	7.50	9.51	8.07	10.66	8.35	10.23
C10orf54	INPP4A	572	3	940	728	821	0.570	16.77	11.92	10.76	11.78	9.18	9.51	12.82	10.66	10.07	10.23
BLVRA	INPP5D	539	386	962	153	712	0.798	10.54	14.00	9.62	9.07	6.99	9.11	10.47	11.41	10.30	8.78
AP1S2	IQGAP1	709	77	997	571	43	0.854	10.84	14.25	10.40	10.93	8.09	10.17	9.86	13.94	11.74	12.39
ARL4C	IQGAP1	19	6	890	93	192	0.780	12.00	14.25	10.94	10.93	8.86	10.17	10.55	13.94	7.25	12.39
C1orf54	IQGAP1	180	333	839	62	19	0.678	6.17	14.25	6.78	10.93	6.32	10.17	7.28	13.94	7.21	12.39
FOLR2	IQGAP1	179	168	912	370	120	0.824	8.67	14.25	4.81	10.93	6.89	10.17	8.58	13.94	7.05	12.39
GMFG	IQGAP1	796	273	996	371	251	0.844	13.33	14.25	6.14	10.93	8.21	10.17	10.84	13.94	7.39	12.39
CHAMP1	IRAK2	583	551	891	5	850	0.540	8.92	9.33	8.41	7.02	9.66	9.60	8.71	9.10	9.62	10.10
DCUN1D5	IRAK2	563	698	927	196	649	0.649	8.64	9.33	8.32	7.02	8.70	9.60	8.49	9.10	10.01	10.10
DLAT	IRAK2	737	419	847	10	12	0.576	8.98	9.33	10.09	7.02	9.91	9.60	9.56	9.10	12.09	10.10
FADD	IRAK2	65	430	800	82	461	0.600	9.12	9.33	4.83	7.02	6.79	9.60	5.58	9.10	6.84	10.10
FAM89A	IRAK2	331	421	964	576	207	0.890	8.31	9.33	6.69	7.02	7.82	9.60	8.85	9.10	7.09	10.10
HNMT	IRF6	45	139	851	451	669	0.618	9.06	6.90	8.41	4.42	11.87	10.87	9.89	8.74	7.84	5.72
HSD17B11	IRF6	12	271	904	680	662	0.637	12.73	6.90	8.94	4.42	12.36	10.87	11.22	8.74	9.12	5.72
ETS2	IRF8	646	340	951	414	219	0.829	12.70	11.63	12.33	5.25	13.86	9.65	14.23	10.22	13.09	5.73
C3orf58	IRS2	879	753	899	547	227	0.459	9.34	11.08	9.11	11.60	9.72	11.75	9.02	11.02	8.41	11.60
DUSP10	IRS2	8	169	610	170	5	0.220	9.50	11.08	6.60	11.60	10.66	11.75	8.03	11.02	8.98	11.60
CPT1A	ISCA1	619	183	994	953	472	0.702	11.47	10.22	10.38	10.89	12.70	10.15	11.59	9.47	10.12	11.43
GJB1	ISOC2	101	194	756	415	47	0.512	3.11	9.22	7.86	10.03	13.76	12.79	2.71	9.22	1.73	10.72
AGL	ITCH	976	858	825	686	10	0.232	9.09	11.74	9.71	10.54	11.84	11.89	9.35	11.20	13.50	11.28
CAT	ITCH	820	594	746	587	789	0.155	13.04	11.74	10.23	10.54	14.24	11.89	12.43	11.20	12.34	11.28
DENND5B	ITCH	527	891	998	968	983	0.311	7.39	11.74	10.50	10.54	10.37	11.89	7.97	11.20	10.54	11.28
DNAJC19	ITCH	862	887	957	653	316	0.463	8.17	11.74	9.61	10.54	10.30	11.89	8.61	11.20	10.86	11.28
BECN1	ITGA6	607	154	926	668	465	0.715	11.06	9.80	9.93	10.03	9.52	9.60	10.02	11.64	11.41	10.73
FAM199X	ITGA6	938	675	938	734	788	0.308	10.37	9.80	11.23	10.03	10.35	9.60	10.57	11.64	10.81	10.73
GARS	ITGA6	688	91	914	288	724	0.622	11.27	9.80	11.79	10.03	11.09	9.60	11.60	11.64	11.56	10.73
H2AFY	ITGA6	455	349	981	434	685	0.870	13.38	9.80	11.42	10.03	11.16	9.60	12.68	11.64	11.90	10.73
HEXB	ITGA6	532	518	958	624	672	0.743	11.77	9.80	9.39	10.03	11.45	9.60	12.18	11.64	10.52	10.73
HTATIP2	ITGA6	149	370	932	672	243	0.778	11.24	9.80	8.56	10.03	11.28	9.60	10.08	11.64	10.01	10.73
ANXA11	ITGB5	605	142	990	851	695	0.654	14.17	9.80	12.34	10.23	11.72	12.45	13.42	12.66	13.41	11.23
ACOT13	ITPR2	860	795	981	950	479	0.409	9.36	10.24	9.23	9.82	10.76	11.55	8.25	9.84	10.11	8.97
EBP	ITPR2	210	70	800	856	527	0.436	10.24	10.24	9.07	9.82	13.01	11.55	9.78	9.84	8.05	8.97
GCLC	ITPR2	672	547	975	725	769	0.594	9.70	10.24	10.15	9.82	12.24	11.55	9.64	9.84	9.80	8.97
GPHN	ITPR2	514	181	890	971	886	0.385	8.00	10.24	10.69	9.82	10.94	11.55	8.69	9.84	10.48	8.97
ACBD4	IVD	984	955	935	847	706	0.159	9.57	10.45	9.65	11.90	12.12	13.72	8.77	11.25	8.55	11.41
GNE	IVD	869	770	975	932	104	0.414	9.17	10.45	9.39	11.90	12.62	13.72	9.41	11.25	9.87	11.41
ADAM28	JAG1	591	397	944	359	749	0.718	9.17	8.20	5.51	9.19	5.64	9.31	7.46	12.08	5.07	10.40
ANK3	JAG1	483	37	941	114	357	0.882	7.81	8.20	12.43	9.19	9.32	9.31	9.27	12.08	11.64	10.40
CYTH3	JAG1	767	369	978	781	932	0.466	9.37	8.20	11.55	9.19	8.76	9.31	11.32	12.08	10.66	10.40
ENDOD1	JAG1	479	488	952	411	569	0.870	9.80	8.20	11.39	9.19	8.75	9.31	10.75	12.08	11.57	10.40
GPD1L	JAG1	781	293	927	252	232	0.714	9.40	8.20	11.02	9.19	7.49	9.31	10.99	12.08	13.46	10.40
ABCC1	JAM3	680	514	985	697	74	0.774	10.87	8.47	8.72	10.95	8.42	7.93	11.69	11.29	11.54	9.16
CYTH3	JAM3	650	324	999	892	929	0.512	9.37	8.47	11.55	10.95	8.76	7.93	11.32	11.29	10.66	9.16
FLNA	JAM3	575	365	1000	719	957	0.625	15.40	8.47	12.88	10.95	12.88	7.93	17.12	11.29	13.12	9.16
AP1S2	KCNJ2	730	325	924	760	248	0.603	10.84	10.60	10.40	7.09	8.09	5.34	9.86	7.23	11.74	8.43
C1orf54	KCNJ2	51	81	771	173	472	0.542	6.17	10.60	6.78	7.09	6.32	5.34	7.28	7.23	7.21	8.43
GGTA1P	KCNJ2	98	334	877	65	498	0.754	8.62	10.60	8.03	7.09	6.10	5.34	7.50	7.23	7.13	8.43
HLA-DMB	KCNJ2	64	341	793	296	713	0.479	11.24	10.60	5.70	7.09	7.71	5.34	11.23	7.23	7.73	8.43
DCAF5	KHK	674	866	826	408	524	0.390	11.76	7.27	11.09	8.03	11.91	13.02	12.01	5.47	12.58	6.63
DCAF8	KHK	665	931	930	655	467	0.485	12.22	7.27	12.57	8.03	13.30	13.02	12.55	5.47	13.65	6.63
FCGRT	KHK	389	3	949	842	826	0.564	13.82	7.27	9.79	8.03	13.71	13.02	13.32	5.47	11.02	6.63
IRGQ	KHNYN	416	266	957	800	926	0.551	10.50	12.09	11.64	9.72	10.31	10.98	10.63	11.67	10.99	11.18
CCND3	KIAA0226	575	800	963	853	875	0.374	14.09	11.44	11.74	11.58	9.88	9.53	12.72	10.80	9.70	10.22
CELF2	KIAA0226	535	956	760	851	725	0.130	13.59	11.44	12.90	11.58	8.49	9.53	12.77	10.80	11.43	10.22
ANXA11	KIAA0930	983	401	958	955	422	0.460	14.17	12.66	12.34	14.04	11.72	11.54	13.42	11.15	13.41	11.37
ATP1A1	KIAA0930	156	319	962	632	308	0.858	12.75	12.66	14.66	14.04	12.79	11.54	15.05	11.15	12.75	11.37
C12orf49	KIAA0930	818	303	994	781	742	0.568	9.22	12.66	9.36	14.04	8.49	11.54	10.34	11.15	7.84	11.37
GMEB2	KIAA0930	758	496	988	742	676	0.638	11.02	12.66	9.53	14.04	9.68	11.54	9.68	11.15	9.92	11.37
IL4R	KIAA0930	912	461	979	279	262	0.752	14.13	12.66	8.99	14.04	13.12	11.54	13.61	11.15	9.39	11.37
E2F3	KIAA1430	412	704	959	807	787	0.519	10.53	8.88	8.80	8.99	8.37	10.43	8.99	10.08	10.01	9.73
ACBD4	KIAA2013	507	845	905	873	546	0.424	9.57	12.20	9.65	10.26	12.12	11.97	8.77	10.76	8.55	11.49
ALAD	KIAA2018	718	720	945	988	948	0.226	10.83	10.01	12.12	9.27	13.07	10.57	10.56	9.58	10.62	11.26
B3GNT1	KIAA2018	695	850	981	961	884	0.267	7.34	10.01	13.27	9.27	9.77	10.57	9.68	9.58	10.26	11.26
CLCN5	KIAA2018	812	982	923	820	521	0.308	8.63	10.01	7.53	9.27	11.16	10.57	9.39	9.58	9.81	11.26
EIF4EBP2	KIAA2018	941	598	944	980	749	0.272	12.86	10.01	11.96	9.27	12.87	10.57	12.98	9.58	13.24	11.26
FTSJ1	KIF5B	440	328	985	838	982	0.560	10.23	11.40	9.43	13.43	9.46	11.47	9.93	12.93	9.87	13.09
BACE1	KLC4	731	945	879	907	822	0.102	8.44	9.87	11.77	10.43	11.13	12.39	10.66	9.42	10.53	9.92
BNIP3	KLC4	504	864	857	905	262	0.355	9.50	9.87	11.44	10.43	12.07	12.39	9.81	9.42	12.63	9.92
CLCN5	KLC4	792	932	984	720	572	0.460	8.63	9.87	7.53	10.43	11.16	12.39	9.39	9.42	9.81	9.92
DBT	KLC4	819	768	961	984	800	0.248	8.72	9.87	9.65	10.43	11.34	12.39	9.25	9.42	10.85	9.92
DHRS4-AS1	KLC4	801	492	939	978	980	0.288	8.44	9.87	8.64	10.43	10.59	12.39	7.95	9.42	8.48	9.92
GPER1	KLC4	531	133	857	797	865	0.371	8.66	9.87	9.21	10.43	10.27	12.39	8.09	9.42	7.12	9.92
HSD17B10	KLC4	823	485	941	767	836	0.419	10.69	9.87	9.29	10.43	12.48	12.39	10.06	9.42	10.76	9.92
DCAF6	KLF12	168	794	942	906	696	0.436	11.06	9.43	12.16	9.60	12.31	10.47	10.99	9.14	14.90	9.84
FBXO7	KLF12	132	201	915	755	427	0.703	14.15	9.43	11.33	9.60	11.96	10.47	12.13	9.14	10.77	9.84
CASC10	KLHDC10	101	437	795	693	81	0.493	2.58	10.32	8.36	10.95	8.98	11.45	4.65	10.75	4.14	11.53
GPER1	KLHDC10	765	120	906	599	402	0.630	8.66	10.32	9.21	10.95	10.27	11.45	8.09	10.75	7.12	11.53
ARHGAP35	KLHDC2	906	889	809	902	736	0.036	10.17	10.24	13.20	11.19	12.36	11.89	11.42	10.48	11.76	11.83
C6orf106	KLHDC2	632	880	881	638	775	0.299	12.16	10.24	13.04	11.19	13.10	11.89	12.59	10.48	14.15	11.83
DAPK1	KMT2A	550	644	943	603	755	0.610	10.51	10.96	11.51	12.07	11.79	11.12	12.09	12.14	8.20	11.39
CISD2	LACTB	337	885	956	848	743	0.424	9.51	10.46	9.52	7.31	10.82	10.47	8.52	9.59	8.54	10.98
FAM49B	LAIR1	803	162	983	891	557	0.591	13.43	12.34	11.32	5.85	9.50	7.48	10.84	11.06	10.69	6.67
HN1	LAIR1	776	41	980	975	626	0.521	12.51	12.34	10.72	5.85	9.27	7.48	9.83	11.06	10.96	6.67
ADA	LAPTM5	105	429	979	324	681	0.868	10.05	17.05	6.77	8.70	7.50	10.31	8.07	14.12	8.35	8.61
BLVRA	LAPTM5	719	325	1000	960	527	0.647	10.54	17.05	9.62	8.70	6.99	10.31	10.47	14.12	10.30	8.61
ENDOD1	LAPTM5	323	561	977	658	36	0.845	9.80	17.05	11.39	8.70	8.75	10.31	10.75	14.12	11.57	8.61
GNPTAB	LAPTM5	374	243	947	838	291	0.725	10.92	17.05	11.47	8.70	9.42	10.31	11.07	14.12	10.56	8.61
GPD2	LAPTM5	550	516	907	809	237	0.626	10.15	17.05	10.51	8.70	8.40	10.31	10.24	14.12	11.19	8.61
BRMS1	LASP1	953	612	989	834	530	0.513	11.48	13.69	8.91	12.15	9.86	12.63	9.85	12.98	10.16	10.19
ANXA11	LBH	80	690	775	718	734	0.229	14.17	10.01	12.34	6.27	11.72	7.61	13.42	11.41	13.41	8.17
ENDOD1	LBH	541	266	965	770	413	0.774	9.80	10.01	11.39	6.27	8.75	7.61	10.75	11.41	11.57	8.17
FAR1	LBH	298	180	943	551	629	0.796	11.68	10.01	11.30	6.27	8.50	7.61	11.70	11.41	10.98	8.17
ADA	LCP1	54	499	929	546	658	0.756	10.05	17.49	6.77	6.72	7.50	11.25	8.07	13.38	8.35	8.29
AMPD3	LDHB	278	447	979	517	66	0.950	11.34	12.28	9.32	14.91	7.03	9.67	9.17	13.24	12.10	12.69
CD53	LDHB	112	608	979	886	127	0.711	15.30	12.28	8.05	14.91	8.96	9.67	12.14	13.24	7.24	12.69
ENDOD1	LDHB	518	759	996	934	480	0.636	9.80	12.28	11.39	14.91	8.75	9.67	10.75	13.24	11.57	12.69
GNB4	LDHB	195	775	989	675	438	0.753	8.68	12.28	6.32	14.91	6.30	9.67	8.90	13.24	7.31	12.69
HLA-DPA1	LDHB	908	332	942	572	304	0.644	12.85	12.28	8.10	14.91	10.06	9.67	13.95	13.24	9.82	12.69
EPS8L1	LDOC1	800	46	937	690	646	0.556	7.62	8.07	3.27	11.94	6.45	7.14	8.99	9.11	5.37	7.64
CDC42SE1	LDOC1L	435	778	846	438	494	0.553	14.50	9.26	11.10	11.34	11.08	8.59	12.81	9.58	10.91	10.91
CRISPLD2	LDOC1L	73	88	579	303	517	0.149	12.06	9.26	7.70	11.34	9.54	8.59	13.48	9.58	10.43	10.91
CELF2	LEF1	411	181	920	476	578	0.801	13.59	10.52	12.90	7.93	8.49	4.32	12.77	7.56	11.43	3.91
FAM49B	LEF1	263	138	679	338	389	0.358	13.43	10.52	11.32	7.93	9.50	4.32	10.84	7.56	10.69	3.91
IER3	LEPROTL1	637	304	826	101	151	0.584	10.97	11.33	6.57	10.27	9.72	10.06	10.59	10.34	7.57	9.47
ABCC1	LGALS3	199	7	955	816	64	0.752	10.87	12.33	8.72	10.38	8.42	8.29	11.69	13.20	11.54	10.66
C4orf48	LGALS3	449	155	898	609	495	0.742	7.94	12.33	8.06	10.38	4.49	8.29	4.56	13.20	3.35	10.66
E2F3	LGALS3	58	77	858	763	102	0.585	10.53	12.33	8.80	10.38	8.37	8.29	8.99	13.20	10.01	10.66
FGD3	LGALS3	119	263	865	372	897	0.547	14.47	12.33	5.96	10.38	8.36	8.29	10.46	13.20	6.94	10.66
ARID5B	LHFPL2	139	881	798	260	163	0.447	10.64	9.78	10.33	8.58	9.28	7.45	11.63	11.10	13.34	8.54
FAM49B	LHFPL2	916	463	922	890	690	0.346	13.43	9.78	11.32	8.58	9.50	7.45	10.84	11.10	10.69	8.54
BDH1	LHPP	851	88	989	862	100	0.622	9.07	10.32	11.12	11.56	13.56	11.06	7.26	8.15	9.22	8.65
CASC10	LIME1	101	430	1000	770	589	0.821	2.58	11.54	8.36	10.12	8.98	12.67	4.65	8.81	4.14	8.56
GCAT	LIME1	322	728	976	296	448	0.838	7.68	11.54	9.53	10.12	10.69	12.67	7.04	8.81	9.20	8.56
ATP1A1	LIMK2	229	97	979	286	410	0.958	12.75	13.94	14.66	10.25	12.79	10.80	15.05	12.07	12.75	10.38
ATP2B4	LIMK2	942	299	1000	946	500	0.556	12.47	13.94	12.63	10.25	11.68	10.80	13.52	12.07	10.86	10.38
ATR	LIMK2	370	212	988	346	846	0.803	9.59	13.94	9.64	10.25	10.15	10.80	9.93	12.07	9.68	10.38
C12orf49	LIMK2	713	492	1000	125	726	0.780	9.22	13.94	9.36	10.25	8.49	10.80	10.34	12.07	7.84	10.38
CALM2	LIMK2	886	87	939	628	561	0.591	13.46	13.94	15.82	10.25	13.44	10.80	14.32	12.07	12.64	10.38
CCT6A	LIMK2	394	377	949	449	861	0.718	11.14	13.94	11.85	10.25	11.72	10.80	12.04	12.07	12.86	10.38
ELF3	LIMK2	384	167	971	561	113	0.911	6.50	13.94	2.97	10.25	11.45	10.80	11.39	12.07	4.44	10.38
GSKIP	LIMK2	719	68	999	199	196	0.888	9.52	13.94	9.16	10.25	9.80	10.80	8.16	12.07	8.67	10.38
CACFD1	LMAN2L	922	829	965	885	877	0.173	8.73	9.35	9.08	8.79	11.92	10.09	9.64	9.24	9.21	9.97
CASC10	LMAN2L	101	707	436	906	394	0.000	2.58	9.35	8.36	8.79	8.98	10.09	4.65	9.24	4.14	9.97
CYTH3	LOC100129550	0	0	0	0	0	0.000	9.37	0.00	11.55	0.00	8.76	0.00	11.32	0.00	10.66	0.00
FURIN	LONP1	33	922	936	835	559	0.464	13.70	10.82	11.52	11.81	14.78	12.43	13.13	11.24	12.28	12.07
ABCC1	LPCAT1	942	931	987	616	141	0.479	10.87	13.23	8.72	11.33	8.42	9.78	11.69	13.90	11.54	8.88
ENTPD1	LPCAT1	272	874	904	119	883	0.429	12.63	13.23	10.25	11.33	9.37	9.78	11.59	13.90	9.95	8.88
CNNM3	LRP1	540	753	808	838	776	0.177	9.86	12.30	8.93	14.40	10.56	14.99	9.25	15.71	10.12	12.54
BLVRA	LRP10	462	104	889	991	799	0.434	10.54	14.72	9.62	11.24	6.99	12.35	10.47	13.66	10.30	12.01
HK1	LRRC8C	531	601	984	758	279	0.773	12.83	10.33	13.57	8.58	9.23	7.21	12.57	9.85	13.74	8.84
FAM213A	LSS	862	315	972	958	860	0.354	7.58	10.31	12.66	12.03	12.03	12.77	9.31	12.21	10.57	11.56
LPCAT1	LTB	431	266	525	53	678	0.037	13.23	12.40	11.33	3.61	9.78	6.30	13.90	6.57	8.88	3.95
BASP1	LY86	502	198	955	147	705	0.806	14.45	10.62	14.01	4.56	8.06	5.22	10.34	7.42	6.68	3.28
FAM89A	LYSMD2	492	237	948	707	487	0.792	8.31	9.64	6.69	10.03	7.82	8.80	8.85	8.20	7.09	8.43
ACADSB	MACROD1	429	493	751	886	641	0.306	8.48	7.28	10.49	8.34	14.23	10.09	9.76	7.88	11.81	12.58
C1RL	MACROD1	8	612	60	829	134	0.000	12.07	7.28	7.72	8.34	13.63	10.09	11.51	7.88	9.57	12.58
COL18A1	MACROD1	65	632	499	437	632	0.000	11.97	7.28	10.21	8.34	15.08	10.09	13.12	7.88	10.94	12.58
DHRS1	MACROD1	656	696	936	892	684	0.408	10.41	7.28	8.49	8.34	11.89	10.09	9.45	7.88	7.78	12.58
GJB1	MACROD1	101	88	811	594	47	0.575	3.11	7.28	7.86	8.34	13.76	10.09	2.71	7.88	1.73	12.58
HAAO	MACROD1	313	283	968	632	730	0.755	8.47	7.28	4.43	8.34	12.90	10.09	6.93	7.88	6.34	12.58
DPAGT1	MAD2L2	693	792	975	813	966	0.318	10.00	10.87	9.41	9.01	10.84	10.15	10.00	9.35	9.32	10.17
LHFPL2	MAEA	864	377	685	691	775	0.092	9.78	12.38	8.58	11.30	7.45	11.29	11.10	11.24	8.54	11.02
DBT	MAF	819	722	909	681	117	0.457	8.72	10.05	9.65	9.82	11.34	11.87	9.25	11.77	10.85	11.72
ADAM19	MAFF	3	147	912	538	9	0.805	12.45	10.33	8.38	8.34	9.65	9.34	10.55	11.63	8.32	11.37
LRIG1	MAN1A1	132	277	970	769	299	0.805	9.20	11.60	12.07	8.42	11.38	13.54	11.05	12.14	11.89	9.85
BCKDHB	MAP2K1	611	191	806	725	580	0.404	7.73	11.38	9.20	11.60	11.25	11.51	8.39	10.88	8.89	11.86
C11orf54	MAP2K1	819	618	847	741	887	0.181	9.55	11.38	8.73	11.60	12.38	11.51	9.43	10.88	10.70	11.86
CMBL	MAP2K1	67	713	661	519	437	0.232	7.17	11.38	9.51	11.60	12.25	11.51	8.09	10.88	12.16	11.86
FXYD1	MAP2K1	124	4	556	73	715	0.084	6.66	11.38	11.46	11.60	12.00	11.51	9.40	10.88	13.11	11.86
GPD1L	MAP3K1	729	499	957	409	401	0.799	9.40	11.47	11.02	7.55	7.49	9.21	10.99	10.24	13.46	8.58
DNAJC19	MAP3K2	712	706	965	826	589	0.513	8.17	12.30	9.61	9.99	10.30	11.51	8.61	11.51	10.86	11.40
ARHGAP35	MARC1	397	669	374	937	558	0.000	10.17	11.50	13.20	8.34	12.36	11.33	11.42	8.39	11.76	8.33
BDH2	MARC1	117	700	810	602	691	0.373	7.37	11.50	9.22	8.34	10.42	11.33	9.42	8.39	8.99	8.33
CCS	MARC1	123	657	777	699	725	0.264	10.83	11.50	9.88	8.34	11.80	11.33	9.71	8.39	9.62	8.33
CMBL	MARC1	16	832	920	841	483	0.503	7.17	11.50	9.51	8.34	12.25	11.33	8.09	8.39	12.16	8.33
GSTZ1	MARC1	778	701	834	904	389	0.262	8.78	11.50	8.02	8.34	11.80	11.33	7.01	8.39	9.99	8.33
HSBP1L1	MARC1	39	541	771	860	266	0.386	8.04	11.50	7.51	8.34	10.03	11.33	8.31	8.39	7.91	8.33
KLHDC10	MARC1	914	714	777	923	367	0.170	10.32	11.50	10.95	8.34	11.45	11.33	10.75	8.39	11.53	8.33
C1orf198	MARCKS	301	111	943	696	1	0.788	8.35	12.70	11.86	12.54	10.07	10.14	12.70	12.28	12.61	9.26
C12orf49	MARS	953	736	995	813	927	0.276	9.22	12.34	9.36	12.40	8.49	11.76	10.34	12.31	7.84	11.72
DDR1	MARVELD1	293	159	840	525	238	0.667	8.38	9.90	12.96	8.01	8.82	8.46	11.84	11.49	11.55	8.90
BASP1	MAX	866	585	733	734	550	0.166	14.45	12.65	14.01	11.05	8.06	10.85	10.34	11.62	6.68	11.09
ICAM1	MB21D2	647	21	695	764	452	0.219	11.25	6.56	6.26	7.59	10.32	4.99	13.44	7.56	9.13	8.03
ADO	MCL1	737	136	898	607	836	0.456	9.12	15.36	10.15	11.98	8.75	14.14	8.81	15.43	9.94	13.60
ERGIC1	MDH2	276	896	992	997	847	0.366	13.83	11.86	11.36	12.80	13.85	13.52	13.11	12.09	12.29	14.66
JAG1	MEF2C	814	280	974	795	370	0.643	8.20	9.94	9.19	13.20	9.31	8.38	12.08	10.55	10.40	13.17
C19orf12	MEGF9	350	863	867	660	680	0.383	9.31	12.99	10.40	11.56	11.19	11.59	8.92	11.56	11.32	9.89
CROT	MEMO1	855	884	911	876	683	0.173	7.98	8.57	8.24	6.85	9.97	7.47	8.17	6.46	9.40	9.13
HSDL2	MEMO1	897	149	947	907	655	0.414	11.41	8.57	10.71	6.85	12.79	7.47	10.38	6.46	12.91	9.13
FAAH	METTL7A	304	30	876	815	333	0.595	9.20	10.96	10.68	11.88	11.40	14.09	9.13	12.50	9.25	11.44
HAGH	METTL7A	67	33	992	896	601	0.736	11.71	10.96	11.55	11.88	12.58	14.09	10.14	12.50	12.09	11.44
CCDC109B	METTL9	407	597	998	874	662	0.679	10.24	13.32	5.46	11.71	6.05	9.29	8.12	11.21	6.87	11.61
DAB2	METTL9	389	536	972	829	650	0.686	10.19	13.32	7.96	11.71	9.53	9.29	12.96	11.21	10.09	11.61
LTB	METTL9	334	164	728	541	400	0.435	12.40	13.32	3.61	11.71	6.30	9.29	6.57	11.21	3.95	11.61
LINC00526	MFN2	406	823	928	791	556	0.521	5.62	12.77	6.07	12.93	8.55	12.80	4.62	12.27	6.96	14.27
BASP1	MFSD1	903	548	875	231	540	0.518	14.45	11.99	14.01	9.20	8.06	10.71	10.34	11.50	6.68	9.62
ETFA	MFSD2A	364	625	672	713	70	0.196	11.06	8.47	10.63	9.78	13.33	13.48	10.83	10.56	13.02	4.98
AMICA1	MFSD6	144	9	907	582	614	0.716	13.99	9.53	3.15	11.69	8.01	7.46	10.35	10.86	5.76	8.85
AMPD3	MFSD6	570	685	943	144	472	0.758	11.34	9.53	9.32	11.69	7.03	7.46	9.17	10.86	12.10	8.85
ITPRIPL2	MGAT5	856	255	930	978	846	0.294	8.38	10.91	6.58	11.63	9.10	9.33	10.74	10.91	9.36	8.58
ASGR2	MGLL	297	481	888	236	217	0.776	10.73	10.15	4.48	14.04	14.72	13.53	5.41	13.03	3.20	11.99
LTBR	MGLL	403	293	891	921	547	0.563	12.01	10.15	7.98	14.04	12.97	13.53	12.30	13.03	10.36	11.99
ELP2	MGST2	530	683	946	962	374	0.562	10.12	9.68	11.00	7.45	11.56	11.74	10.83	9.31	11.66	9.67
DCXR	MIA3	558	211	14	853	765	0.000	10.80	11.08	11.08	10.87	14.79	12.05	10.53	11.08	11.74	11.23
DHRS3	MIA3	377	167	665	788	596	0.200	10.29	11.08	9.60	10.87	13.74	12.05	11.45	11.08	11.36	11.23
HSD17B10	MIA3	753	344	840	928	963	0.213	10.69	11.08	9.29	10.87	12.48	12.05	10.06	11.08	10.76	11.23
ANXA11	MICALL1	797	141	954	953	650	0.458	14.17	10.11	12.34	8.36	11.72	9.45	13.42	10.38	13.41	10.08
MGAT5	MICALL1	985	587	968	957	588	0.386	10.91	10.11	11.63	8.36	9.33	9.45	10.91	10.38	8.58	10.08
ACBD4	MICU1	560	900	977	715	754	0.489	9.57	11.89	9.65	11.75	12.12	11.68	8.77	10.82	8.55	11.83
FXYD1	MICU1	18	11	816	123	833	0.474	6.66	11.89	11.46	11.75	12.00	11.68	9.40	10.82	13.11	11.83
LRRC75B	MICU1	101	108	96	50	47	0.000	0.00	11.89	0.00	11.75	0.00	11.68	0.00	10.82	0.00	11.83
HMGCL	MLF2	940	534	940	790	612	0.442	10.43	12.91	9.21	13.65	13.52	13.45	9.80	12.42	10.64	12.51
ACBD4	MLYCD	859	781	878	867	660	0.172	9.57	9.05	9.65	7.94	12.12	11.06	8.77	8.05	8.55	11.65
FGFRL1	MLYCD	176	239	972	520	702	0.833	9.04	9.05	11.14	7.94	11.95	11.06	10.14	8.05	10.42	11.65
CAPN5	MMAB	608	697	886	332	816	0.462	9.12	8.67	10.52	9.74	12.54	12.02	8.83	9.35	7.59	10.04
FAM213A	MMAB	915	664	969	979	814	0.257	7.58	8.67	12.66	9.74	12.03	12.02	9.31	9.35	10.57	10.04
LRP3	MMAB	496	577	672	684	917	0.134	9.51	8.67	12.36	9.74	11.46	12.02	9.41	9.35	10.56	10.04
MICU1	MMAB	425	790	877	976	927	0.232	11.89	8.67	11.75	9.74	11.68	12.02	10.82	9.35	11.83	10.04
ACBD4	MMACHC	711	695	803	494	507	0.400	9.57	6.62	9.65	6.58	12.12	9.63	8.77	4.84	8.55	7.93
BDH2	MMACHC	590	210	629	322	523	0.202	7.37	6.62	9.22	6.58	10.42	9.63	9.42	4.84	8.99	7.93
ADAM17	MMD	746	749	885	783	632	0.315	10.26	9.49	8.70	10.49	7.96	8.76	10.24	9.36	9.26	8.19
APH1B	MMD	419	465	834	753	530	0.526	10.85	9.49	9.34	10.49	7.64	8.76	9.53	9.36	8.68	8.19
GLTP	MMD	662	101	950	834	565	0.620	11.32	9.49	10.36	10.49	9.61	8.76	10.45	9.36	9.97	8.19
ITGA6	MMD	760	315	892	517	502	0.644	9.80	9.49	10.03	10.49	9.60	8.76	11.64	9.36	10.73	8.19
CRISPLD2	MMGT1	844	284	838	568	478	0.473	12.06	10.57	7.70	9.43	9.54	8.87	13.48	10.14	10.43	10.62
CROT	MPC1	926	844	793	922	716	0.038	7.98	9.83	8.24	10.96	9.97	12.83	8.17	9.96	9.40	11.53
ANXA5	MPHOSPH6	728	353	963	898	887	0.419	12.97	8.64	11.49	8.87	12.29	8.37	14.44	8.56	11.68	8.22
COQ10A	MPLKIP	384	870	923	949	29	0.450	8.44	9.75	8.75	8.57	9.96	10.47	7.45	8.54	11.56	9.04
DCAF6	MPLKIP	794	797	888	970	582	0.245	11.06	9.75	12.16	8.57	12.31	10.47	10.99	8.54	14.90	9.04
EIF4EBP2	MPLKIP	908	652	767	870	817	0.058	12.86	9.75	11.96	8.57	12.87	10.47	12.98	8.54	13.24	9.04
FBXL20	MPLKIP	908	905	846	849	916	0.000	9.47	9.75	6.56	8.57	7.66	10.47	6.79	8.54	7.87	9.04
FOXP2	MPLKIP	101	537	822	689	673	0.445	2.74	9.75	6.69	8.57	8.17	10.47	6.78	8.54	8.87	9.04
GPER1	MPLKIP	644	372	920	591	605	0.670	8.66	9.75	9.21	8.57	10.27	10.47	8.09	8.54	7.12	9.04
ITPR2	MPLKIP	833	529	799	886	732	0.169	10.24	9.75	9.82	8.57	11.55	10.47	9.84	8.54	8.97	9.04
KLF12	MPLKIP	234	841	982	487	322	0.793	9.43	9.75	9.60	8.57	10.47	10.47	9.14	8.54	9.84	9.04
AMOTL1	MPND	567	675	189	206	35	0.000	7.62	9.56	9.61	9.25	10.59	9.54	11.84	7.68	14.12	8.64
ASPDH	MPND	487	953	996	154	47	0.765	4.80	9.56	9.48	9.25	11.11	9.54	2.28	7.68	1.91	8.64
CASC10	MPND	101	334	997	788	587	0.806	2.58	9.56	8.36	9.25	8.98	9.54	4.65	7.68	4.14	8.64
CLU	MPND	384	47	288	519	631	0.000	12.76	9.56	18.59	9.25	16.43	9.54	14.68	7.68	10.77	8.64
CMBL	MPND	199	547	997	904	747	0.645	7.17	9.56	9.51	9.25	12.25	9.54	8.09	7.68	12.16	8.64
CNNM3	MPND	827	497	825	871	809	0.171	9.86	9.56	8.93	9.25	10.56	9.54	9.25	7.68	10.12	8.64
COPZ2	MPND	816	16	888	760	946	0.294	7.28	9.56	6.55	9.25	9.66	9.54	8.42	7.68	10.75	8.64
FAXDC2	MPND	147	174	948	552	693	0.773	11.01	9.56	10.92	9.25	12.04	9.54	11.36	7.68	9.41	8.64
CHPT1	MPP5	446	693	974	941	605	0.579	11.93	8.56	10.85	10.38	11.91	10.23	10.99	10.14	10.38	10.73
IFIT3	MPPE1	520	525	808	611	276	0.538	10.78	10.85	9.49	8.19	9.16	9.23	10.26	9.23	8.21	9.49
AACS	MPZL1	127	407	1000	926	673	0.701	9.30	11.41	11.54	10.19	8.69	10.54	9.50	11.97	9.15	10.09
ARPC2	MPZL1	963	763	1000	975	681	0.309	14.63	11.41	12.36	10.19	11.91	10.54	13.74	11.97	13.04	10.09
ATP6V1F	MPZL1	475	641	991	905	845	0.536	11.65	11.41	12.12	10.19	10.01	10.54	11.09	11.97	11.04	10.09
C12orf49	MPZL1	709	878	996	827	834	0.368	9.22	11.41	9.36	10.19	8.49	10.54	10.34	11.97	7.84	10.09
CAPNS1	MPZL1	501	691	995	957	938	0.447	13.74	11.41	13.80	10.19	12.65	10.54	14.01	11.97	13.49	10.09
CCT6A	MPZL1	342	800	1000	991	721	0.494	11.14	11.41	11.85	10.19	11.72	10.54	12.04	11.97	12.86	10.09
COMMD8	MPZL1	689	702	978	790	703	0.514	8.72	11.41	7.94	10.19	8.39	10.54	7.75	11.97	8.15	10.09
DCTPP1	MPZL1	347	470	988	970	755	0.614	9.47	11.41	8.88	10.19	8.80	10.54	8.20	11.97	9.94	10.09
DNM1L	MPZL1	292	570	1000	976	755	0.600	10.21	11.41	12.33	10.19	10.10	10.54	11.16	11.97	11.68	10.09
EIF2S2	MPZL1	680	846	1000	994	659	0.410	11.08	11.41	10.82	10.19	11.31	10.54	11.58	11.97	12.16	10.09
EXOSC9	MPZL1	115	689	942	846	811	0.461	9.78	11.41	8.81	10.19	9.00	10.54	9.38	11.97	9.67	10.09
FAM118B	MPZL1	845	848	995	916	518	0.426	9.22	11.41	9.21	10.19	8.08	10.54	8.72	11.97	9.93	10.09
FAM127A	MPZL1	442	583	975	840	773	0.602	10.85	11.41	13.75	10.19	10.94	10.54	12.08	11.97	12.29	10.09
IARS	MPZL1	19	548	987	952	636	0.656	10.56	11.41	11.80	10.19	11.80	10.54	12.11	11.97	12.66	10.09
MED7	MPZL1	610	720	937	864	527	0.513	8.77	11.41	7.66	10.19	8.28	10.54	7.79	11.97	8.85	10.09
MINA	MPZL1	474	835	993	962	465	0.588	8.48	11.41	8.43	10.19	9.16	10.54	8.62	11.97	10.46	10.09
ALG3	MRPL22	777	939	997	989	965	0.159	10.27	8.53	8.42	8.35	11.21	9.65	9.57	8.52	10.21	9.57
HIST1H2AC	MRPL27	275	148	711	42	644	0.350	13.01	9.23	8.29	10.17	10.98	10.64	9.89	9.07	10.03	10.82
HIST1H2BK	MRPL27	695	640	920	752	418	0.546	12.16	9.23	6.41	10.17	10.86	10.64	9.74	9.07	7.55	10.82
C2	MRPL34	445	485	777	797	54	0.415	8.88	9.75	6.16	10.01	14.70	11.60	11.67	9.30	7.04	11.13
KIAA1430	MRPL47	663	888	983	936	754	0.345	8.88	8.78	8.99	8.97	10.43	9.34	10.08	8.47	9.73	10.13
MPZL1	MRPL47	455	882	996	941	691	0.485	11.41	8.78	10.19	8.97	10.54	9.34	11.97	8.47	10.09	10.13
MPZL1	MRPL50	438	833	988	940	653	0.513	11.41	8.31	10.19	9.36	10.54	9.76	11.97	8.71	10.09	9.85
GPER1	MRPL57	0	0	0	0	0	0.000	8.66	0.00	9.21	0.00	10.27	0.00	8.09	0.00	7.12	0.00
MPZL1	MRPS17	592	586	863	889	585	0.413	11.41	8.24	10.19	9.11	10.54	9.54	11.97	7.71	10.09	10.32
FTL	MRPS21	649	261	953	899	941	0.411	18.59	10.01	16.19	11.40	17.22	10.81	18.59	10.37	14.18	10.58
MPZL1	MRPS23	802	620	996	878	502	0.591	11.41	8.91	10.19	9.53	10.54	9.39	11.97	9.02	10.09	10.55
ANK3	MRVI1	40	1	955	94	249	0.910	7.81	11.57	12.43	11.97	9.32	7.82	9.27	10.95	11.64	9.86
IQGAP1	MSL3	920	102	959	379	319	0.708	14.25	12.80	10.93	10.26	10.17	9.79	13.94	10.85	12.39	10.80
ABCC1	MSN	880	11	942	960	323	0.473	10.87	15.53	8.72	11.71	8.42	12.67	11.69	15.62	11.54	12.24
C15orf57	MSN	762	61	931	683	752	0.513	9.31	15.53	7.99	11.71	8.16	12.67	7.95	15.62	9.28	12.24
C4orf48	MSN	348	159	878	129	418	0.756	7.94	15.53	8.06	11.71	4.49	12.67	4.56	15.62	3.35	12.24
DNM1L	MSN	716	26	996	924	763	0.540	10.21	15.53	12.33	11.71	10.10	12.67	11.16	15.62	11.68	12.24
ELF3	MSN	191	108	958	507	297	0.912	6.50	15.53	2.97	11.71	11.45	12.67	11.39	15.62	4.44	12.24
ARMC6	MSRA	482	986	623	882	925	0.061	10.18	10.75	9.94	9.28	11.78	10.89	9.17	8.24	10.00	8.85
ASPDH	MSRA	144	721	747	301	47	0.384	4.80	10.75	9.48	9.28	11.11	10.89	2.28	8.24	1.91	8.85
ILVBL	MSRA	340	744	977	945	875	0.422	9.84	10.75	10.35	9.28	11.74	10.89	10.22	8.24	9.95	8.85
KLC4	MSRA	658	965	920	712	897	0.246	9.87	10.75	10.43	9.28	12.39	10.89	9.42	8.24	9.92	8.85
ATP6V0E2	MSRB1	115	255	790	767	766	0.314	9.72	14.23	13.70	8.56	11.53	12.94	8.21	9.84	8.87	10.98
ELP6	MSRB1	455	550	994	899	880	0.574	9.26	14.23	9.29	8.56	9.57	12.94	8.37	9.84	9.60	10.98
KLC4	MSRB1	767	425	828	635	882	0.291	9.87	14.23	10.43	8.56	12.39	12.94	9.42	9.84	9.92	10.98
MRPL34	MSRB1	542	557	984	851	605	0.691	9.75	14.23	10.01	8.56	11.60	12.94	9.30	9.84	11.13	10.98
LDOC1L	MSRB3	279	387	392	451	660	0.000	9.26	8.88	11.34	9.54	8.59	8.06	9.58	11.84	10.91	12.10
MARCKSL1	MSRB3	108	300	800	664	321	0.518	10.75	8.88	13.13	9.54	10.07	8.06	10.43	11.84	8.49	12.10
CROT	MTCH2	856	955	941	950	875	0.075	7.98	10.31	8.24	10.86	9.97	12.77	8.17	10.08	9.40	11.83
MGAT5	MTF1	739	909	965	854	579	0.390	10.91	11.58	11.63	8.97	9.33	8.89	10.91	9.42	8.58	10.04
HN1	MTFP1	7	499	988	925	80	0.763	12.51	9.78	10.72	6.96	9.27	9.34	9.83	7.78	10.96	8.93
BACE1	MTFR1L	922	900	679	984	680	0.000	8.44	10.55	11.77	11.68	11.13	11.89	10.66	10.51	10.53	12.28
CASC10	MTFR1L	101	538	946	828	433	0.709	2.58	10.55	8.36	11.68	8.98	11.89	4.65	10.51	4.14	12.28
GAMT	MTFR1L	521	720	891	795	582	0.473	8.45	10.55	10.48	11.68	13.88	11.89	6.91	10.51	13.72	12.28
GPER1	MTFR1L	377	161	916	714	692	0.629	8.66	10.55	9.21	11.68	10.27	11.89	8.09	10.51	7.12	12.28
KIAA2018	MTFR1L	835	963	784	979	645	0.070	10.01	10.55	9.27	11.68	10.57	11.89	9.58	10.51	11.26	12.28
LINC00526	MTFR1L	792	892	702	962	708	0.000	5.62	10.55	6.07	11.68	8.55	11.89	4.62	10.51	6.96	12.28
HAGH	MTMR10	14	113	894	890	854	0.416	11.71	11.22	11.55	10.90	12.58	11.01	10.14	10.37	12.09	11.63
AEBP1	MTMR2	776	41	963	643	647	0.643	9.24	9.03	11.07	10.41	11.28	8.18	14.79	10.30	10.88	9.30
ENTPD1	MTMR2	69	898	975	952	933	0.308	12.63	9.03	10.25	10.41	9.37	8.18	11.59	10.30	9.95	9.30
CHPT1	MTMR4	462	176	721	763	540	0.311	11.93	11.47	10.85	11.52	11.91	12.62	10.99	10.78	10.38	10.06
GPER1	MTMR4	333	14	717	663	657	0.274	8.66	11.47	9.21	11.52	10.27	12.62	8.09	10.78	7.12	10.06
HNF1A	MTMR4	299	768	883	836	447	0.464	5.33	11.47	5.92	11.52	11.10	12.62	3.12	10.78	4.51	10.06
KLC4	MTMR4	518	984	862	972	858	0.174	9.87	11.47	10.43	11.52	12.39	12.62	9.42	10.78	9.92	10.06
MGST2	MTMR4	411	449	756	926	413	0.384	9.68	11.47	7.45	11.52	11.74	12.62	9.31	10.78	9.67	10.06
ACADS	MTSS1	819	370	876	765	225	0.460	10.09	10.93	9.05	10.59	13.50	12.57	9.30	11.22	12.57	11.45
CRAT	MTSS1	648	556	742	882	180	0.261	10.59	10.93	11.50	10.59	13.38	12.57	10.06	11.22	13.49	11.45
C15orf57	MVP	911	186	943	928	768	0.333	9.31	14.01	7.99	10.24	8.16	12.22	7.95	13.72	9.28	11.52
C11orf71	MXI1	101	108	96	50	47	0.000	0.00	12.17	0.00	11.92	0.00	10.98	0.00	10.60	0.00	11.32
IMPA1	MXI1	182	842	782	604	367	0.371	9.06	12.17	9.48	11.92	11.02	10.98	8.86	10.60	9.44	11.32
MTMR4	MXI1	346	523	893	479	680	0.684	11.47	12.17	11.52	11.92	12.62	10.98	10.78	10.60	10.06	11.32
ARID5B	MYADM	431	806	937	698	4	0.622	10.64	13.40	10.33	9.66	9.28	9.98	11.63	12.69	13.34	9.85
ELF3	MYADM	250	276	814	366	354	0.628	6.50	13.40	2.97	9.66	11.45	9.98	11.39	12.69	4.44	9.85
CRISPLD2	MYLIP	874	112	680	215	212	0.270	12.06	11.54	7.70	8.79	9.54	8.11	13.48	10.92	10.43	10.24
ETS1	MYLIP	363	417	962	650	901	0.648	12.49	11.54	9.08	8.79	10.77	8.11	13.32	10.92	10.72	10.24
JAG1	MYLIP	881	331	948	655	925	0.415	8.20	11.54	9.19	8.79	9.31	8.11	12.08	10.92	10.40	10.24
LBH	MYLIP	415	484	830	558	541	0.611	10.01	11.54	6.27	8.79	7.61	8.11	11.41	10.92	8.17	10.24
HMHA1	MYO5A	822	671	843	667	741	0.235	15.06	11.30	8.97	13.52	10.04	8.39	12.50	10.50	8.50	10.41
ESR1	N4BP2L1	835	851	915	772	589	0.306	7.01	10.06	4.99	10.59	10.12	11.78	7.68	10.26	8.20	9.36
ITCH	N4BP2L1	893	964	555	844	415	0.028	11.74	10.06	10.54	10.59	11.89	11.78	11.20	10.26	11.28	9.36
CASC10	NAA60	101	541	718	654	694	0.241	2.58	12.33	8.36	11.95	8.98	12.76	4.65	11.83	4.14	10.88
AKAP9	NAAA	661	845	930	867	808	0.270	10.40	11.23	11.00	8.10	12.22	10.67	11.83	9.41	12.01	8.49
C11orf1	NAAA	561	743	954	812	887	0.406	7.60	11.23	7.71	8.10	8.42	10.67	6.92	9.41	7.80	8.49
CCS	NAAA	499	754	733	848	936	0.117	10.83	11.23	9.88	8.10	11.80	10.67	9.71	9.41	9.62	8.49
DNAJC19	NAAA	655	912	948	866	813	0.273	8.17	11.23	9.61	8.10	10.30	10.67	8.61	9.41	10.86	8.49
FXYD1	NAAA	146	111	682	500	749	0.273	6.66	11.23	11.46	8.10	12.00	10.67	9.40	9.41	13.11	8.49
KLHDC2	NAAA	738	935	965	917	934	0.168	10.24	11.23	11.19	8.10	11.89	10.67	10.48	9.41	11.83	8.49
MAP2K1	NAAA	739	830	663	745	775	0.000	11.38	11.23	11.60	8.10	11.51	10.67	10.88	9.41	11.86	8.49
MXI1	NAAA	69	700	769	723	576	0.288	12.17	11.23	11.92	8.10	10.98	10.67	10.60	9.41	11.32	8.49
FAM168B	NACC2	914	116	1000	981	1000	0.302	11.25	10.92	13.31	12.82	11.93	10.51	12.16	10.67	12.79	11.26
KLC4	NAGA	844	477	956	837	970	0.344	9.87	11.56	10.43	8.18	12.39	10.75	9.42	10.69	9.92	9.27
GRAMD4	NAMPT	696	137	968	146	813	0.681	10.35	16.57	11.07	10.21	12.81	14.12	10.39	14.13	10.88	12.32
BAG3	NANS	11	184	901	598	922	0.552	10.13	10.77	10.80	8.82	10.72	10.17	11.79	9.91	14.54	9.35
CLIC1	NAP1L1	149	395	999	790	597	0.804	14.83	12.60	8.59	13.54	11.25	12.08	13.61	14.64	10.15	14.04
CMTM3	NAP1L1	487	411	986	737	252	0.854	11.85	12.60	6.96	13.54	8.18	12.08	10.90	14.64	8.39	14.04
COL1A1	NAP1L1	446	79	929	250	19	0.858	8.40	12.60	6.87	13.54	11.90	12.08	14.71	14.64	10.66	14.04
CYTH3	NAP1L1	900	845	976	850	577	0.366	9.37	12.60	11.55	13.54	8.76	12.08	11.32	14.64	10.66	14.04
DAB2	NAP1L1	662	698	973	807	606	0.559	10.19	12.60	7.96	13.54	9.53	12.08	12.96	14.64	10.09	14.04
CLIC1	NAP1L4	628	311	829	951	809	0.275	14.83	11.80	8.59	12.60	11.25	11.83	13.61	11.72	10.15	12.83
KLC4	NAPEPLD	802	967	943	965	972	0.070	9.87	8.32	10.43	10.74	12.39	9.87	9.42	8.71	9.92	9.20
ABHD2	NAV2	42	932	637	917	374	0.137	12.85	6.28	11.72	10.91	13.66	11.61	12.41	11.22	11.64	9.17
ABLIM3	NAV2	31	731	896	675	547	0.566	9.59	6.28	11.06	10.91	13.51	11.61	11.40	11.22	11.98	9.17
GOT1	NAV2	695	653	786	687	220	0.304	9.19	6.28	13.05	10.91	13.94	11.61	9.56	11.22	13.67	9.17
COQ10A	NBR2	345	262	908	880	36	0.626	8.44	7.88	8.75	5.94	9.96	7.99	7.45	6.43	11.56	6.65
KLHDC10	NBR2	969	300	901	841	804	0.279	10.32	7.88	10.95	5.94	11.45	7.99	10.75	6.43	11.53	6.65
DENND5A	NCBP2	647	736	989	650	946	0.488	13.06	10.19	12.69	11.25	10.39	10.65	12.32	10.86	11.13	11.10
APH1B	NCK2	901	501	926	642	731	0.465	10.85	11.16	9.34	10.68	7.64	8.84	9.53	10.87	8.68	11.12
ARHGEF10	NCK2	386	230	908	864	315	0.634	7.28	11.16	10.76	10.68	8.43	8.84	12.15	10.87	9.12	11.12
FAM89A	NCOA7	849	105	992	531	774	0.657	8.31	10.06	6.69	11.02	7.82	10.68	8.85	11.28	7.09	9.33
LIMK2	NCOA7	593	98	983	698	977	0.582	13.94	10.06	10.25	11.02	10.80	10.68	12.07	11.28	10.38	9.33
C11orf71	NCOR1	101	108	96	50	47	0.000	0.00	11.90	0.00	12.00	0.00	12.04	0.00	12.07	0.00	12.45
ESR1	NCOR1	883	884	439	762	159	0.000	7.01	11.90	4.99	12.00	10.12	12.04	7.68	12.07	8.20	12.45
ITCH	NCOR1	980	984	988	956	1000	0.022	11.74	11.90	10.54	12.00	11.89	12.04	11.20	12.07	11.28	12.45
NAAA	NCOR1	813	875	864	836	818	0.062	11.23	11.90	8.10	12.00	10.67	12.04	9.41	12.07	8.49	12.45
ANK3	NDN	286	653	992	613	410	0.851	7.81	6.00	12.43	10.80	9.32	7.50	9.27	9.78	11.64	8.89
FXYD5	NDN	209	123	968	808	840	0.612	13.57	6.00	7.37	10.80	8.87	7.50	11.78	9.78	9.03	8.89
MARCKSL1	NDN	193	375	958	645	764	0.712	10.75	6.00	13.13	10.80	10.07	7.50	10.43	9.78	8.49	8.89
MYLIP	NDN	247	713	948	531	714	0.667	11.54	6.00	8.79	10.80	8.11	7.50	10.92	9.78	10.24	8.89
ACAT1	NDRG2	591	524	193	543	229	0.000	9.64	8.85	10.70	16.77	14.36	13.94	10.77	12.41	13.55	15.25
C2	NDUFA11	434	576	699	693	480	0.264	8.88	11.25	6.16	11.50	14.70	12.23	11.67	11.16	7.04	11.92
ACBD4	NDUFB7	890	873	831	829	828	0.003	9.57	10.61	9.65	11.13	12.12	11.54	8.77	10.16	8.55	12.11
AMT	NDUFC1	358	737	567	519	875	0.058	9.69	9.38	9.84	10.41	11.69	10.43	10.01	9.26	9.67	11.57
GJB1	NDUFC1	101	134	809	457	47	0.618	3.11	9.38	7.86	10.41	13.76	10.43	2.71	9.26	1.73	11.57
ACBD4	NDUFS7	985	874	648	826	793	0.000	9.57	10.64	9.65	10.92	12.12	10.76	8.77	9.64	8.55	12.33
IL13RA1	NDUFV2	527	336	927	950	630	0.562	12.26	10.80	8.64	11.11	12.92	12.88	12.22	10.83	11.50	12.99
ERMARD	NECAB2	399	152	866	426	531	0.717	9.17	8.99	8.91	11.42	10.12	8.38	9.00	3.14	9.61	3.23
MMD	NEDD9	608	259	742	370	581	0.390	9.49	12.03	10.49	9.10	8.76	9.66	9.36	13.67	8.19	11.16
FGD4	NET1	504	441	987	680	232	0.882	11.46	8.63	9.14	10.09	10.75	11.30	10.76	10.41	10.84	10.90
FGFR1OP	NET1	548	496	961	789	553	0.727	9.56	8.63	9.43	10.09	10.88	11.30	8.99	10.41	9.06	10.90
ALAD	NEU4	216	451	896	38	326	0.792	10.83	4.35	12.12	8.37	13.07	11.68	10.56	3.22	10.62	6.79
C8orf82	NEU4	381	652	906	55	435	0.736	9.32	4.35	9.05	8.37	11.26	11.68	8.99	3.22	9.62	6.79
ECI1	NEU4	321	704	751	155	104	0.400	9.79	4.35	9.72	8.37	12.27	11.68	9.65	3.22	11.95	6.79
MTFR1L	NEU4	180	440	904	44	224	0.808	10.55	4.35	11.68	8.37	11.89	11.68	10.51	3.22	12.28	6.79
C11orf71	NFIA	101	108	96	50	47	0.000	0.00	8.50	0.00	10.81	0.00	11.69	0.00	10.64	0.00	10.88
DNAJC19	NFIA	710	162	951	795	876	0.462	8.17	8.50	9.61	10.81	10.30	11.69	8.61	10.64	10.86	10.88
ESR1	NFIA	697	246	990	913	826	0.512	7.01	8.50	4.99	10.81	10.12	11.69	7.68	10.64	8.20	10.88
GAMT	NFIA	133	192	867	783	719	0.483	8.45	8.50	10.48	10.81	13.88	11.69	6.91	10.64	13.72	10.88
ITCH	NFIA	793	428	843	860	453	0.368	11.74	8.50	10.54	10.81	11.89	11.69	11.20	10.64	11.28	10.88
ADCK3	NHSL1	548	45	523	820	78	0.023	11.12	6.58	10.84	8.82	12.86	11.21	10.46	9.67	15.54	6.75
AKAP9	NHSL1	581	96	909	784	698	0.536	10.40	6.58	11.00	8.82	12.22	11.21	11.83	9.67	12.01	6.75
ANGEL1	NHSL1	655	138	865	537	481	0.634	9.41	6.58	10.58	8.82	10.61	11.21	10.29	9.67	10.05	6.75
ARHGAP35	NHSL1	669	106	393	985	402	0.000	10.17	6.58	13.20	8.82	12.36	11.21	11.42	9.67	11.76	6.75
BIVM	NHSL1	495	65	965	646	370	0.857	7.84	6.58	9.93	8.82	10.69	11.21	9.46	9.67	10.41	6.75
CBR4	NHSL1	559	393	985	761	516	0.802	9.23	6.58	9.36	8.82	11.24	11.21	8.78	9.67	10.01	6.75
DCAF5	NHSL1	601	203	837	651	293	0.548	11.76	6.58	11.09	8.82	11.91	11.21	12.01	9.67	12.58	6.75
FAM13A	NHSL1	690	80	894	694	728	0.482	9.97	6.58	10.53	8.82	11.26	11.21	10.10	9.67	9.99	6.75
FAM214A	NHSL1	528	401	947	669	151	0.795	10.05	6.58	9.26	8.82	10.73	11.21	10.13	9.67	11.97	6.75
KLC4	NHSL1	544	72	890	876	701	0.469	9.87	6.58	10.43	8.82	12.39	11.21	9.42	9.67	9.92	6.75
MPLKIP	NHSL1	615	235	968	772	568	0.709	9.75	6.58	8.57	8.82	10.47	11.21	8.54	9.67	9.04	6.75
NAPEPLD	NHSL1	659	27	976	796	582	0.683	8.32	6.58	10.74	8.82	9.87	11.21	8.71	9.67	9.20	6.75
ARHGEF3	NIN	748	969	914	951	594	0.243	10.98	12.69	10.85	10.71	7.58	8.96	10.63	10.90	9.47	11.10
CAPN2	NIN	651	648	980	817	515	0.644	12.44	12.69	12.38	10.71	11.25	8.96	14.65	10.90	12.91	11.10
LGALS3	NIN	150	122	945	705	227	0.787	12.33	12.69	10.38	10.71	8.29	8.96	13.20	10.90	10.66	11.10
LPXN	NIN	497	739	692	787	285	0.192	11.68	12.69	7.10	10.71	8.89	8.96	9.82	10.90	7.67	11.10
APOE	NIPSNAP1	117	70	862	511	693	0.622	8.26	10.29	14.36	11.18	16.57	13.03	12.62	9.00	8.73	7.56
CHDH	NIPSNAP1	381	17	973	760	304	0.816	6.05	10.29	10.17	11.18	12.42	13.03	7.98	9.00	9.09	7.56
CNNM3	NIPSNAP1	935	660	951	902	625	0.341	9.86	10.29	8.93	11.18	10.56	13.03	9.25	9.00	10.12	7.56
DBI	NIPSNAP1	764	30	977	987	555	0.556	10.16	10.29	11.94	11.18	13.23	13.03	11.33	9.00	10.67	7.56
GPT	NIPSNAP1	472	368	818	872	504	0.475	5.41	10.29	7.40	11.18	12.95	13.03	4.50	9.00	10.46	7.56
MSRB1	NIPSNAP1	406	242	684	799	818	0.184	14.23	10.29	8.56	11.18	12.94	13.03	9.84	9.00	10.98	7.56
GLYCTK	NIT1	941	748	965	817	648	0.353	10.18	10.91	5.58	9.99	13.73	11.51	7.67	10.05	7.62	9.83
HAAO	NIT1	703	189	922	786	919	0.390	8.47	10.91	4.43	9.99	12.90	11.51	6.93	10.05	6.34	9.83
ACSL1	NIT2	56	482	895	346	293	0.790	16.81	9.27	10.48	9.20	15.79	12.33	14.09	9.58	15.03	10.78
ITPR2	NIT2	466	283	868	845	681	0.473	10.24	9.27	9.82	9.20	11.55	12.33	9.84	9.58	8.97	10.78
MICU1	NME4	146	574	877	823	831	0.390	11.89	10.58	11.75	10.84	11.68	12.37	10.82	10.41	11.83	9.91
MSRA	NME4	214	541	856	829	651	0.452	10.75	10.58	9.28	10.84	10.89	12.37	8.24	10.41	8.85	9.91
CCS	NMRK1	446	639	875	960	960	0.305	10.83	10.30	9.88	9.61	11.80	10.71	9.71	9.85	9.62	9.82
NAAA	NMRK1	660	813	730	845	859	0.035	11.23	10.30	8.10	9.61	10.67	10.71	9.41	9.85	8.49	9.82
ATG7	NOL7	921	814	939	914	989	0.084	11.17	8.10	9.64	7.01	8.51	7.39	9.40	6.42	9.34	7.55
GNA12	NOL7	153	594	867	851	864	0.330	11.18	8.10	12.20	7.01	10.58	7.39	11.64	6.42	10.36	7.55
MPZL1	NOL7	765	862	942	902	835	0.202	11.41	8.10	10.19	7.01	10.54	7.39	11.97	6.42	10.09	7.55
CLIC1	NOP56	225	118	907	858	885	0.443	14.83	11.35	8.59	11.80	11.25	11.39	13.61	11.45	10.15	11.56
CEBPA	NR2F6	607	512	890	752	618	0.535	6.26	7.69	1.59	10.18	6.52	12.52	2.61	9.91	4.42	10.43
C11orf71	NR3C2	101	108	96	50	47	0.000	0.00	7.55	0.00	9.89	0.00	9.11	0.00	8.91	0.00	9.68
C8orf82	NR3C2	724	497	954	828	128	0.632	9.32	7.55	9.05	9.89	11.26	9.11	8.99	8.91	9.62	9.68
MARC1	NR3C2	24	799	852	702	681	0.363	11.50	7.55	8.34	9.89	11.33	9.11	8.39	8.91	8.33	9.68
CLPB	NSFL1C	276	927	997	912	820	0.414	9.63	12.52	8.34	11.95	9.62	11.44	7.96	11.32	9.32	12.38
C10orf54	NSMAF	831	121	969	810	542	0.597	16.77	11.06	10.76	9.84	9.18	8.92	12.82	10.39	10.07	10.67
LPCAT1	NSMAF	588	956	924	804	582	0.399	13.23	11.06	11.33	9.84	9.78	8.92	13.90	10.39	8.88	10.67
GM2A	NSMCE2	647	425	942	923	550	0.574	11.92	8.68	10.46	7.42	9.97	8.17	11.15	8.15	8.86	9.65
GPER1	NT5C3B	52	254	582	448	775	0.123	8.66	9.02	9.21	11.20	10.27	10.32	8.09	9.68	7.12	9.37
AK1	NTMT1	702	865	995	595	816	0.501	10.63	10.26	11.71	9.89	10.92	10.07	11.47	9.23	13.90	11.09
AMT	NUDT16	36	680	590	187	659	0.090	9.69	11.71	9.84	12.01	11.69	12.06	10.01	11.74	9.67	11.21
HNF1A	NUDT16	395	515	794	637	466	0.512	5.33	11.71	5.92	12.01	11.10	12.06	3.12	11.74	4.51	11.21
HSD17B10	NUDT16	136	642	986	857	833	0.556	10.69	11.71	9.29	12.01	12.48	12.06	10.06	11.74	10.76	11.21
ISOC2	NUDT16	39	585	546	540	586	0.026	9.22	11.71	10.03	12.01	12.79	12.06	9.22	11.74	10.72	11.21
MMACHC	NUDT16	569	767	983	831	657	0.554	6.62	11.71	6.58	12.01	9.63	12.06	4.84	11.74	7.93	11.21
NDUFA2	NUDT16	776	593	875	766	739	0.313	10.35	11.71	9.91	12.01	10.58	12.06	9.11	11.74	10.94	11.21
CRLF3	NUP93	278	811	911	901	937	0.261	11.08	10.09	7.83	9.27	8.17	8.74	9.01	9.97	8.02	10.32
BACE1	NUPR1	285	4	576	787	798	0.076	8.44	7.17	11.77	8.81	11.13	13.21	10.66	12.42	10.53	10.94
CNPY2	NUPR1	84	43	609	948	888	0.109	9.86	7.17	10.08	8.81	11.46	13.21	10.08	12.42	9.57	10.94
ISCA2	NUPR1	44	197	739	946	274	0.358	9.42	7.17	8.39	8.81	8.74	13.21	7.81	12.42	9.44	10.94
NDUFA2	NUPR1	43	47	814	976	610	0.416	10.35	7.17	9.91	8.81	10.58	13.21	9.11	12.42	10.94	10.94
ICAM2	OAZ1	112	253	752	734	736	0.269	10.62	16.43	6.48	14.44	6.26	13.82	9.55	14.50	8.59	14.33
ACBD4	OAZ2	281	858	975	730	812	0.500	9.57	12.71	9.65	12.40	12.12	11.91	8.77	11.52	8.55	12.56
CASC10	OCEL1	101	282	967	896	342	0.736	2.58	9.73	8.36	8.61	8.98	10.76	4.65	8.54	4.14	8.70
COL18A1	OCEL1	714	394	775	420	285	0.443	11.97	9.73	10.21	8.61	15.08	10.76	13.12	8.54	10.94	8.70
C12orf49	ODC1	396	824	942	952	865	0.319	9.22	11.13	9.36	10.44	8.49	11.73	10.34	11.23	7.84	12.88
EHD4	ODC1	459	782	974	732	584	0.649	10.39	11.13	7.45	10.44	9.74	11.73	10.94	11.23	9.25	12.88
GATAD2A	ODC1	299	899	991	618	937	0.505	12.62	11.13	10.68	10.44	11.47	11.73	11.92	11.23	11.06	12.88
IER3	ODC1	336	600	838	41	43	0.626	10.97	11.13	6.57	10.44	9.72	11.73	10.59	11.23	7.57	12.88
IER5L	ODC1	538	507	939	92	227	0.856	8.87	11.13	7.61	10.44	8.10	11.73	7.89	11.23	6.97	12.88
IL4R	ODC1	24	563	941	449	440	0.851	14.13	11.13	8.99	10.44	13.12	11.73	13.61	11.23	9.39	12.88
ITPKC	ODC1	4	755	958	641	906	0.515	11.28	11.13	9.11	10.44	10.11	11.73	11.77	11.23	10.30	12.88
AK1	OGFOD1	513	721	975	661	231	0.752	10.63	9.64	11.71	9.37	10.92	9.89	11.47	9.54	13.90	11.84
CDKN1A	OGFOD1	571	457	750	154	546	0.442	11.53	9.64	9.70	9.37	12.43	9.89	13.29	9.54	12.99	11.84
GPER1	OGFOD2	548	66	758	526	877	0.350	8.66	9.44	9.21	7.52	10.27	9.00	8.09	7.85	7.12	8.00
MAST3	OGFOD2	801	614	989	604	789	0.574	13.15	9.44	13.48	7.52	10.84	9.00	10.19	7.85	8.39	8.00
CYSTM1	OLA1	115	278	929	779	867	0.535	13.01	10.31	10.56	11.47	10.17	10.01	11.46	9.92	12.44	11.81
ELOVL1	OLA1	565	115	997	986	922	0.507	11.88	10.31	10.42	11.47	10.69	10.01	11.54	9.92	9.80	11.81
GRAMD1A	OLA1	235	773	885	615	859	0.397	13.69	10.31	11.03	11.47	10.35	10.01	12.62	9.92	11.78	11.81
ITGA6	OLA1	851	107	970	614	752	0.582	9.80	10.31	10.03	11.47	9.60	10.01	11.64	9.92	10.73	11.81
MPZL1	OLA1	173	548	997	986	714	0.620	11.41	10.31	10.19	11.47	10.54	10.01	11.97	9.92	10.09	11.81
DYNLT1	OPTN	5	321	982	610	808	0.755	11.88	11.80	9.02	12.50	10.40	11.85	11.18	12.19	10.98	15.22
ARHGAP35	ORAI3	739	389	463	884	323	0.000	10.17	10.87	13.20	8.13	12.36	11.61	11.42	9.36	11.76	8.70
ATPIF1	ORAI3	687	408	983	936	667	0.571	10.91	10.87	11.98	8.13	12.11	11.61	10.56	9.36	11.77	8.70
CAPN5	ORAI3	6	371	949	526	800	0.735	9.12	10.87	10.52	8.13	12.54	11.61	8.83	9.36	7.59	8.70
COQ10A	ORAI3	144	698	804	929	25	0.357	8.44	10.87	8.75	8.13	9.96	11.61	7.45	9.36	11.56	8.70
DCAF11	ORAI3	604	426	971	983	726	0.541	12.42	10.87	12.33	8.13	13.56	11.61	11.24	9.36	12.31	8.70
LIME1	ORAI3	531	671	954	650	921	0.521	11.54	10.87	10.12	8.13	12.67	11.61	8.81	9.36	8.56	8.70
MTMR4	ORAI3	442	241	925	949	889	0.443	11.47	10.87	11.52	8.13	12.62	11.61	10.78	9.36	10.06	8.70
NR3C2	ORAI3	160	666	967	808	266	0.697	7.55	10.87	9.89	8.13	9.11	11.61	8.91	9.36	9.68	8.70
GPX4	OSGIN1	515	341	908	834	622	0.581	12.18	8.94	13.13	6.59	13.36	12.49	12.60	8.35	13.04	9.75
FAXDC2	OVGP1	59	461	900	144	379	0.800	11.01	8.14	10.92	8.57	12.04	8.40	11.36	7.06	9.41	7.61
CCDC101	OXER1	625	383	742	693	87	0.325	10.35	10.36	7.52	3.80	9.26	10.57	8.58	5.38	10.29	5.36
GCDH	OXER1	210	413	766	614	453	0.475	9.95	10.36	9.16	3.80	12.05	10.57	8.73	5.38	10.20	5.36
GPATCH4	PACSIN2	274	537	902	808	956	0.430	9.39	13.02	10.09	10.71	9.77	11.67	9.35	12.45	11.51	11.77
ELOVL1	PAFAH1B3	767	66	926	990	498	0.505	11.88	8.93	10.42	8.64	10.69	6.91	11.54	6.46	9.80	7.16
APH1B	PAG1	580	750	954	414	736	0.625	10.85	12.55	9.34	9.24	7.64	9.95	9.53	12.30	8.68	8.65
HK1	PAG1	380	649	915	394	593	0.709	12.83	12.55	13.57	9.24	9.23	9.95	12.57	12.30	13.74	8.65
COL1A1	PALD1	507	307	931	35	370	0.859	8.40	6.45	6.87	9.69	11.90	7.31	14.71	11.25	10.66	9.02
ATR	PALLD	818	29	910	204	809	0.506	9.59	8.69	9.64	11.00	10.15	10.51	9.93	13.81	9.68	13.70
GLS	PALLD	745	12	961	643	449	0.728	11.04	8.69	12.80	11.00	9.64	10.51	12.55	13.81	10.56	13.70
MMGT1	PALLD	603	507	958	723	938	0.530	10.57	8.69	9.43	11.00	8.87	10.51	10.14	13.81	10.62	13.70
NAPEPLD	PALM3	0	680	933	167	0	0.000	8.32	1.98	10.74	6.30	9.87	11.42	8.71	6.64	9.20	2.63
CCDC109B	PAM	644	385	996	898	648	0.647	10.24	10.75	5.46	11.67	6.05	9.43	8.12	12.84	6.87	12.91
EFEMP2	PAM	834	64	995	858	740	0.524	9.81	10.75	10.23	11.67	9.16	9.43	11.74	12.84	9.95	12.91
EPB41L2	PAM	174	627	999	769	799	0.650	8.91	10.75	12.59	11.67	10.15	9.43	12.95	12.84	10.64	12.91
MTFR1L	PAOX	921	772	937	983	617	0.251	10.55	8.04	11.68	6.95	11.89	9.33	10.51	6.35	12.28	7.84
NUDT16	PAOX	91	828	845	664	694	0.347	11.71	8.04	12.01	6.95	12.06	9.33	11.74	6.35	11.21	7.84
GADD45B	PAPD7	554	280	887	571	509	0.707	13.01	10.12	10.24	10.46	13.34	11.32	13.21	11.01	10.57	10.37
ENTPD1	PAPOLG	918	910	975	937	952	0.091	12.63	10.02	10.25	8.60	9.37	8.54	11.59	9.13	9.95	9.35
CTSC	PAQR8	907	178	954	677	761	0.485	12.74	9.07	6.93	12.50	10.18	5.89	12.96	8.07	9.13	6.60
GNB4	PAQR8	893	350	967	692	954	0.414	8.68	9.07	6.32	12.50	6.30	5.89	8.90	8.07	7.31	6.60
LMO2	PAQR8	933	238	979	496	511	0.736	11.06	9.07	9.56	12.50	7.60	5.89	10.53	8.07	10.35	6.60
MARCKS	PAQR8	510	311	940	641	917	0.596	12.70	9.07	12.54	12.50	10.14	5.89	12.28	8.07	9.26	6.60
MSL3	PAQR8	784	279	905	746	658	0.466	12.80	9.07	10.26	12.50	9.79	5.89	10.85	8.07	10.80	6.60
NAGK	PAQR8	851	286	943	859	886	0.338	12.57	9.07	10.57	12.50	10.12	5.89	10.91	8.07	9.93	6.60
NIN	PAQR8	725	338	973	806	318	0.680	12.69	9.07	10.71	12.50	8.96	5.89	10.90	8.07	11.10	6.60
ACOT13	PARP16	546	722	947	929	858	0.366	9.36	9.58	9.23	7.60	10.76	9.62	8.25	8.16	10.11	8.27
AKAP9	PARP16	757	954	892	934	844	0.091	10.40	9.58	11.00	7.60	12.22	9.62	11.83	8.16	12.01	8.27
NHSL1	PARP16	471	305	928	740	737	0.618	6.58	9.58	8.82	7.60	11.21	9.62	9.67	8.16	6.75	8.27
BASP1	PARVG	699	85	948	332	784	0.654	14.45	13.12	14.01	6.23	8.06	8.91	10.34	11.27	6.68	6.74
CASC10	PATZ1	101	526	979	846	461	0.772	2.58	9.92	8.36	9.79	8.98	10.09	4.65	9.56	4.14	9.70
GLYCTK	PAXIP1-AS1	831	723	933	814	891	0.236	10.18	7.98	5.58	8.04	13.73	8.73	7.67	7.63	7.62	8.85
GRB10	PAXIP1-AS1	104	766	839	726	374	0.432	11.26	7.98	11.67	8.04	11.85	8.73	11.40	7.63	12.16	8.85
ADM	PBDC1	252	123	887	55	564	0.742	12.97	8.85	7.41	7.74	10.45	9.24	12.16	8.95	10.85	9.35
COL1A1	PBX1	295	71	835	252	65	0.670	8.40	8.95	6.87	11.46	11.90	8.71	14.71	11.33	10.66	12.18
EFEMP2	PBX1	69	198	895	767	184	0.656	9.81	8.95	10.23	11.46	9.16	8.71	11.74	11.33	9.95	12.18
ABHD2	PCSK6	538	63	886	775	775	0.478	12.85	8.25	11.72	7.92	13.66	12.71	12.41	7.04	11.64	9.22
APMAP	PCSK6	645	294	996	841	933	0.532	13.88	8.25	11.98	7.92	14.10	12.71	11.96	7.04	10.81	9.22
ACBD4	PCYOX1	807	748	891	865	780	0.182	9.57	9.21	9.65	11.07	12.12	12.34	8.77	11.71	8.55	11.60
DHTKD1	PCYOX1	879	436	994	930	751	0.458	10.60	9.21	9.45	11.07	13.17	12.34	9.06	11.71	10.94	11.60
FAM210B	PCYOX1	27	920	977	957	839	0.346	12.79	9.21	10.77	11.07	11.95	12.34	10.67	11.71	12.00	11.60
MMACHC	PCYOX1	937	861	943	592	834	0.274	6.62	9.21	6.58	11.07	9.63	12.34	4.84	11.71	7.93	11.60
BTG2	PCYOX1L	842	327	453	436	99	0.000	12.52	9.74	10.85	9.68	9.57	6.53	13.09	8.23	13.09	7.10
FAR1	PCYOX1L	623	779	954	743	811	0.430	11.68	9.74	11.30	9.68	8.50	6.53	11.70	8.23	10.98	7.10
IGFBP7	PCYOX1L	740	32	931	515	829	0.570	10.42	9.74	11.28	9.68	12.67	6.53	14.10	8.23	11.84	7.10
IKZF1	PCYOX1L	939	60	890	640	677	0.426	12.91	9.74	4.65	9.68	7.92	6.53	10.14	8.23	6.36	7.10
JAM3	PCYOX1L	792	367	922	297	930	0.487	8.47	9.74	10.95	9.68	7.93	6.53	11.29	8.23	9.16	7.10
ACACB	PCYT2	879	164	951	682	37	0.622	9.42	9.88	10.48	11.50	13.66	13.03	10.47	10.08	14.55	10.39
CMBL	PCYT2	295	688	976	795	518	0.702	7.17	9.88	9.51	11.50	12.25	13.03	8.09	10.08	12.16	10.39
E2F3	PDCD4	738	556	760	470	258	0.373	10.53	11.33	8.80	9.79	8.37	10.78	8.99	10.94	10.01	9.58
MPZL1	PDE12	331	866	970	937	511	0.533	11.41	9.47	10.19	9.29	10.54	10.34	11.97	9.35	10.09	10.08
AEBP1	PDE4A	751	35	975	722	128	0.714	9.24	10.63	11.07	11.76	11.28	8.06	14.79	10.60	10.88	10.86
BCL2	PDE4A	817	200	943	819	419	0.568	10.02	10.63	9.58	11.76	7.28	8.06	8.96	10.60	10.41	10.86
JAM3	PDE4A	311	288	948	759	160	0.766	8.47	10.63	10.95	11.76	7.93	8.06	11.29	10.60	9.16	10.86
AMICA1	PDE7A	253	85	822	603	98	0.593	13.99	11.40	3.15	9.13	8.01	8.66	10.35	10.77	5.76	12.02
ARHGAP30	PDE7A	550	265	574	332	172	0.123	14.26	11.40	5.78	9.13	8.61	8.66	11.40	10.77	7.30	12.02
ARHGEF3	PDE7A	995	857	973	820	600	0.321	10.98	11.40	10.85	9.13	7.58	8.66	10.63	10.77	9.47	12.02
CMTM7	PDE7A	633	264	773	222	51	0.479	11.80	11.40	4.61	9.13	7.65	8.66	10.12	10.77	7.08	12.02
FGD3	PDE7A	447	329	947	763	224	0.762	14.47	11.40	5.96	9.13	8.36	8.66	10.46	10.77	6.94	12.02
GMFG	PDE7A	216	224	616	515	232	0.225	13.33	11.40	6.14	9.13	8.21	8.66	10.84	10.77	7.39	12.02
HLA-DMA	PDE7A	566	324	906	679	82	0.690	11.56	11.40	6.73	9.13	8.90	8.66	12.02	10.77	8.66	12.02
HLA-DRB6	PDE7A	265	30	414	148	76	0.000	7.83	11.40	1.71	9.13	4.30	8.66	6.79	10.77	4.83	12.02
HMHA1	PDE7A	643	567	941	845	178	0.605	15.06	11.40	8.97	9.13	10.04	8.66	12.50	10.77	8.50	12.02
KIAA0226	PDE7A	929	931	852	812	403	0.196	11.44	11.40	11.58	9.13	9.53	8.66	10.80	10.77	10.22	12.02
LAPTM5	PDE7A	606	155	396	181	316	0.000	17.05	11.40	8.70	9.13	10.31	8.66	14.12	10.77	8.61	12.02
LPCAT1	PDE7A	903	767	669	38	105	0.169	13.23	11.40	11.33	9.13	9.78	8.66	13.90	10.77	8.88	12.02
PARVG	PDE7A	666	254	873	672	307	0.577	13.12	11.40	6.23	9.13	8.91	8.66	11.27	10.77	6.74	12.02
ATP1B3	PDGFA	336	711	928	784	826	0.446	11.47	6.37	11.55	9.87	9.07	8.03	12.73	10.20	10.33	10.12
COL1A1	PDGFA	368	264	758	133	439	0.516	8.40	6.37	6.87	9.87	11.90	8.03	14.71	10.20	10.66	10.12
CYTH2	PDGFA	465	710	954	633	447	0.737	11.07	6.37	11.11	9.87	9.81	8.03	10.89	10.20	10.17	10.12
ELF3	PDGFA	303	315	920	493	209	0.840	6.50	6.37	2.97	9.87	11.45	8.03	11.39	10.20	4.44	10.12
MPZL1	PDGFA	298	749	906	663	759	0.476	11.41	6.37	10.19	9.87	10.54	8.03	11.97	10.20	10.09	10.12
COL18A1	PDK2	182	297	971	209	350	0.942	11.97	9.05	10.21	11.01	15.08	10.03	13.12	8.44	10.94	12.15
GJB1	PDK2	101	170	989	809	47	0.824	3.11	9.05	7.86	11.01	13.76	10.03	2.71	8.44	1.73	12.15
MPLKIP	PDK2	463	769	865	864	98	0.413	9.75	9.05	8.57	11.01	10.47	10.03	8.54	8.44	9.04	12.15
AEBP1	PDP1	187	63	880	142	214	0.760	9.24	8.66	11.07	11.76	11.28	7.82	14.79	9.24	10.88	9.83
CRISPLD2	PDP1	544	75	920	66	3	0.818	12.06	8.66	7.70	11.76	9.54	7.82	13.48	9.24	10.43	9.83
GLIPR2	PDP1	589	33	974	539	753	0.757	13.44	8.66	8.00	11.76	7.51	7.82	11.39	9.24	8.06	9.83
HEG1	PDP1	370	208	969	844	817	0.608	9.15	8.66	10.18	11.76	9.12	7.82	13.23	9.24	10.30	9.83
IER3	PDP1	486	180	770	4	505	0.537	10.97	8.66	6.57	11.76	9.72	7.82	10.59	9.24	7.57	9.83
JAG1	PDP1	957	339	904	431	403	0.606	8.20	8.66	9.19	11.76	9.31	7.82	12.08	9.24	10.40	9.83
PARP16	PDXDC1	854	939	975	934	917	0.128	9.58	10.53	7.60	11.15	9.62	13.29	8.16	12.07	8.27	11.94
ACBD4	PDXP	699	589	805	554	566	0.406	9.57	5.06	9.65	7.72	12.12	6.30	8.77	2.59	8.55	5.11
C2	PDXP	440	300	707	480	202	0.414	8.88	5.06	6.16	7.72	14.70	6.30	11.67	2.59	7.04	5.11
CNNM3	PDXP	680	357	911	563	627	0.637	9.86	5.06	8.93	7.72	10.56	6.30	9.25	2.59	10.12	5.11
GJB1	PDXP	101	116	834	379	47	0.668	3.11	5.06	7.86	7.72	13.76	6.30	2.71	2.59	1.73	5.11
DAXX	PEA15	703	861	989	898	654	0.420	11.80	11.14	10.42	15.89	10.60	10.78	10.83	13.58	11.02	11.67
NSMAF	PEA15	259	647	967	716	639	0.683	11.06	11.14	9.84	15.89	8.92	10.78	10.39	13.58	10.67	11.67
GLYCTK	PEBP1	548	697	981	827	507	0.672	10.18	10.84	5.58	15.69	13.73	15.39	7.67	12.99	7.62	13.61
ARPC2	PECAM1	0	0	0	0	0	0.000	14.63	0.00	12.36	0.00	11.91	0.00	13.74	0.00	13.04	0.00
ENDOD1	PECAM1	0	0	0	0	0	0.000	9.80	0.00	11.39	0.00	8.75	0.00	10.75	0.00	11.57	0.00
HMGN4	PECAM1	0	0	0	0	0	0.000	10.68	0.00	8.72	0.00	8.50	0.00	10.09	0.00	10.07	0.00
MYLIP	PECAM1	0	0	0	0	0	0.000	11.54	0.00	8.79	0.00	8.11	0.00	10.92	0.00	10.24	0.00
PDE7A	PECAM1	0	0	0	0	0	0.000	11.40	0.00	9.13	0.00	8.66	0.00	10.77	0.00	12.02	0.00
PDP1	PECAM1	0	0	0	0	0	0.000	8.66	0.00	11.76	0.00	7.82	0.00	9.24	0.00	9.83	0.00
ADHFE1	PECR	22	559	957	836	961	0.488	8.66	9.87	9.62	6.19	12.15	11.62	9.00	7.03	11.31	7.21
AKAP9	PECR	385	743	753	841	685	0.166	10.40	9.87	11.00	6.19	12.22	11.62	11.83	7.03	12.01	7.21
ALDH3A2	PECR	735	738	985	798	337	0.585	10.03	9.87	10.92	6.19	13.35	11.62	12.04	7.03	11.88	7.21
CLU	PECR	541	541	604	483	525	0.154	12.76	9.87	18.59	6.19	16.43	11.62	14.68	7.03	10.77	7.21
CMAS	PECR	713	587	844	924	380	0.366	9.73	9.87	11.38	6.19	11.12	11.62	9.53	7.03	10.86	7.21
DNAJC19	PECR	508	763	938	986	937	0.303	8.17	9.87	9.61	6.19	10.30	11.62	8.61	7.03	10.86	7.21
ECHS1	PECR	64	775	996	984	984	0.370	10.75	9.87	12.15	6.19	14.92	11.62	10.96	7.03	12.67	7.21
FAAH	PECR	124	612	886	956	850	0.348	9.20	9.87	10.68	6.19	11.40	11.62	9.13	7.03	9.25	7.21
FBXO7	PECR	15	643	930	826	287	0.625	14.15	9.87	11.33	6.19	11.96	11.62	12.13	7.03	10.77	7.21
FH	PECR	343	803	563	958	969	0.032	10.19	9.87	10.92	6.19	12.98	11.62	10.25	7.03	12.65	7.21
GPHN	PECR	47	706	450	931	409	0.000	8.00	9.87	10.69	6.19	10.94	11.62	8.69	7.03	10.48	7.21
HAGH	PECR	34	524	993	919	526	0.751	11.71	9.87	11.55	6.19	12.58	11.62	10.14	7.03	12.09	7.21
KLHDC2	PECR	786	672	940	893	658	0.376	10.24	9.87	11.19	6.19	11.89	11.62	10.48	7.03	11.83	7.21
KLHL15	PECR	477	741	107	563	125	0.000	9.22	9.87	7.91	6.19	9.67	11.62	8.36	7.03	9.30	7.21
MTFR1L	PECR	649	717	910	896	914	0.234	10.55	9.87	11.68	6.19	11.89	11.62	10.51	7.03	12.28	7.21
N4BP2L1	PECR	232	697	821	54	223	0.543	10.06	9.87	10.59	6.19	11.78	11.62	10.26	7.03	9.36	7.21
NSMCE4A	PECR	433	769	932	870	52	0.544	9.54	9.87	8.75	6.19	10.44	11.62	10.07	7.03	9.86	7.21
CAPN5	PER3	707	483	922	432	824	0.579	9.12	7.20	10.52	10.45	12.54	10.57	8.83	9.32	7.59	10.18
CTPS1	PER3	884	490	745	95	23	0.367	9.54	7.20	9.54	10.45	11.61	10.57	9.69	9.32	10.26	10.18
NEU4	PER3	528	438	743	36	3	0.472	4.35	7.20	8.37	10.45	11.68	10.57	3.22	9.32	6.79	10.18
NHSL1	PER3	477	571	942	459	596	0.800	6.58	7.20	8.82	10.45	11.21	10.57	9.67	9.32	6.75	10.18
GALNT2	PEX11A	619	609	477	375	854	0.000	11.49	6.54	10.54	8.25	13.07	10.02	11.43	7.09	12.23	9.42
ALKBH7	PEX11G	367	653	902	979	644	0.455	10.62	7.53	9.79	5.47	11.53	9.02	9.51	5.78	11.11	6.03
BCKDHA	PEX11G	550	644	440	975	870	0.000	11.37	7.53	10.50	5.47	12.08	9.02	10.21	5.78	12.04	6.03
CLPP	PEX11G	307	447	89	893	795	0.000	10.76	7.53	9.70	5.47	11.07	9.02	9.89	5.78	11.32	6.03
CLU	PEX11G	477	305	337	420	545	0.000	12.76	7.53	18.59	5.47	16.43	9.02	14.68	5.78	10.77	6.03
ECI1	PEX11G	319	618	953	957	595	0.573	9.79	7.53	9.72	5.47	12.27	9.02	9.65	5.78	11.95	6.03
HSD17B10	PEX11G	263	659	690	860	823	0.111	10.69	7.53	9.29	5.47	12.48	9.02	10.06	5.78	10.76	6.03
MSRA	PEX11G	656	211	808	749	757	0.285	10.75	7.53	9.28	5.47	10.89	9.02	8.24	5.78	8.85	6.03
MTFR1L	PEX11G	461	410	954	883	649	0.642	10.55	7.53	11.68	5.47	11.89	9.02	10.51	5.78	12.28	6.03
NDUFB7	PEX11G	539	659	767	966	736	0.183	10.61	7.53	11.13	5.47	11.54	9.02	10.16	5.78	12.11	6.03
COL18A1	PEX14	160	355	913	602	601	0.725	11.97	9.84	10.21	10.23	15.08	10.55	13.12	9.28	10.94	10.02
NUDT16	PEX14	21	631	823	624	788	0.374	11.71	9.84	12.01	10.23	12.06	10.55	11.74	9.28	11.21	10.02
ACBD4	PEX19	864	840	878	908	774	0.078	9.57	11.11	9.65	11.75	12.12	12.23	8.77	10.99	8.55	11.92
AGPAT3	PEX5	877	939	972	983	673	0.213	11.40	9.87	12.76	11.81	12.71	11.47	11.53	10.78	12.78	12.22
CMBL	PEX5	50	538	146	403	140	0.000	7.17	9.87	9.51	11.81	12.25	11.47	8.09	10.78	12.16	12.22
GPER1	PEX5	480	124	343	68	360	0.000	8.66	9.87	9.21	11.81	10.27	11.47	8.09	10.78	7.12	12.22
AEBP1	PFKM	835	87	949	426	158	0.731	9.24	9.45	11.07	13.10	11.28	8.86	14.79	10.81	10.88	15.56
COL1A1	PFKM	591	47	958	695	147	0.773	8.40	9.45	6.87	13.10	11.90	8.86	14.71	10.81	10.66	15.56
CRISPLD2	PFKM	44	70	754	217	219	0.508	12.06	9.45	7.70	13.10	9.54	8.86	13.48	10.81	10.43	15.56
CYBRD1	PFKM	156	133	933	442	383	0.866	10.73	9.45	10.79	13.10	9.89	8.86	13.57	10.81	11.05	15.56
LGALS3	PFKM	312	140	935	815	559	0.683	12.33	9.45	10.38	13.10	8.29	8.86	13.20	10.81	10.66	15.56
MRVI1	PFKM	20	50	902	573	345	0.767	11.57	9.45	11.97	13.10	7.82	8.86	10.95	10.81	9.86	15.56
PECAM1	PFKM	101	108	96	50	47	0.000	0.00	9.45	0.00	13.10	0.00	8.86	0.00	10.81	0.00	15.56
AEBP1	PFKP	831	105	917	657	332	0.590	9.24	10.85	11.07	13.22	11.28	7.82	14.79	10.46	10.88	11.33
CRISPLD2	PFKP	25	109	927	680	791	0.619	12.06	10.85	7.70	13.22	9.54	7.82	13.48	10.46	10.43	11.33
CTSC	PFKP	350	556	668	795	120	0.224	12.74	10.85	6.93	13.22	10.18	7.82	12.96	10.46	9.13	11.33
GAS7	PFKP	17	910	927	774	23	0.512	13.36	10.85	14.35	13.22	7.49	7.82	11.95	10.46	9.20	11.33
JAG1	PFKP	318	225	875	323	466	0.750	8.20	10.85	9.19	13.22	9.31	7.82	12.08	10.46	10.40	11.33
LAPTM5	PFKP	296	256	911	655	753	0.618	17.05	10.85	8.70	13.22	10.31	7.82	14.12	10.46	8.61	11.33
ACADS	PGM1	548	886	906	811	879	0.250	10.09	11.42	9.05	11.18	13.50	13.46	9.30	11.02	12.57	15.09
CBR4	PGM1	845	626	679	645	760	0.043	9.23	11.42	9.36	11.18	11.24	13.46	8.78	11.02	10.01	15.09
DBT	PGM1	558	759	898	601	575	0.549	8.72	11.42	9.65	11.18	11.34	13.46	9.25	11.02	10.85	15.09
ECSIT	PGM1	258	504	921	855	820	0.502	10.88	11.42	10.86	11.18	11.11	13.46	9.57	11.02	11.94	15.09
ESR1	PGM1	523	270	449	177	472	0.000	7.01	11.42	4.99	11.18	10.12	13.46	7.68	11.02	8.20	15.09
GPT	PGM1	63	759	555	540	497	0.062	5.41	11.42	7.40	11.18	12.95	13.46	4.50	11.02	10.46	15.09
HSBP1L1	PGM1	282	607	475	837	295	0.000	8.04	11.42	7.51	11.18	10.03	13.46	8.31	11.02	7.91	15.09
PARP16	PGM1	671	463	814	708	290	0.439	9.58	11.42	7.60	11.18	9.62	13.46	8.16	11.02	8.27	15.09
PCBD1	PGM1	297	707	977	817	825	0.529	9.09	11.42	10.21	11.18	13.15	13.46	10.08	11.02	10.65	15.09
PEX11G	PGM1	784	525	463	647	412	0.000	7.53	11.42	5.47	11.18	9.02	13.46	5.78	11.02	6.03	15.09
NT5C3B	PGPEP1	691	344	894	824	681	0.440	9.02	11.43	11.20	10.08	10.32	11.91	9.68	10.27	9.37	10.94
DHRSX	PHB	573	565	957	974	654	0.539	10.09	10.56	7.01	10.39	10.19	11.03	8.43	10.48	9.05	11.46
HK1	PHC1	283	915	871	611	942	0.316	12.83	8.12	13.57	9.12	9.23	7.01	12.57	8.51	13.74	8.50
CAPN5	PHGDH	634	30	953	515	984	0.605	9.12	8.21	10.52	12.10	12.54	12.30	8.83	9.45	7.59	6.97
ESR1	PHGDH	140	24	908	140	838	0.647	7.01	8.21	4.99	12.10	10.12	12.30	7.68	9.45	8.20	6.97
MICU1	PHGDH	132	20	963	876	688	0.644	11.89	8.21	11.75	12.10	11.68	12.30	10.82	9.45	11.83	6.97
NIT1	PHGDH	107	187	966	408	751	0.806	10.91	8.21	9.99	12.10	11.51	12.30	10.05	9.45	9.83	6.97
PEX11G	PHGDH	36	685	924	631	479	0.690	7.53	8.21	5.47	12.10	9.02	12.30	5.78	9.45	6.03	6.97
NCK2	PHIP	762	474	904	873	456	0.490	11.16	11.02	10.68	10.34	8.84	10.06	10.87	11.55	11.12	11.33
LYSMD2	PHLDA1	506	690	802	305	51	0.506	9.64	8.18	10.03	10.28	8.80	10.70	8.20	11.73	8.43	9.23
ARHGDIB	PHTF2	78	317	935	733	218	0.753	16.50	9.67	8.63	9.01	10.52	8.63	13.01	9.48	10.22	12.51
ADPRHL2	PI4K2A	356	950	994	729	986	0.406	10.33	10.59	9.34	11.26	9.54	10.42	9.56	10.64	10.29	10.31
NDUFA12	PIGO	878	653	979	953	517	0.458	10.05	9.86	10.52	8.97	9.97	10.19	9.63	9.76	11.80	9.18
ISG15	PIGR	398	236	789	30	182	0.578	10.23	5.64	8.53	2.12	9.66	10.97	9.12	11.61	7.70	4.02
GNAO1	PIGV	24	870	909	320	388	0.633	7.82	9.65	14.47	8.23	11.06	10.36	6.02	8.25	7.57	8.25
GPER1	PIGV	783	369	870	840	607	0.375	8.66	9.65	9.21	8.23	10.27	10.36	8.09	8.25	7.12	8.25
PECR	PIGV	971	800	913	993	311	0.263	9.87	9.65	6.19	8.23	11.62	10.36	7.03	8.25	7.21	8.25
ARPC2	PIK3IP1	537	476	837	414	484	0.655	14.63	12.53	12.36	10.82	11.91	8.54	13.74	11.76	13.04	10.04
CALHM2	PIK3IP1	681	419	879	479	727	0.554	10.76	12.53	8.09	10.82	7.57	8.54	10.13	11.76	8.90	10.04
NIN	PIK3IP1	720	560	899	574	107	0.621	12.69	12.53	10.71	10.82	8.96	8.54	10.90	11.76	11.10	10.04
ALAD	PIK3R1	691	505	971	860	425	0.664	10.83	11.56	12.12	12.83	13.07	12.80	10.56	12.54	10.62	12.78
FAM210B	PIK3R1	77	804	779	894	33	0.279	12.79	11.56	10.77	12.83	11.95	12.80	10.67	12.54	12.00	12.78
MTFR1L	PIK3R1	684	936	867	847	155	0.285	10.55	11.56	11.68	12.83	11.89	12.80	10.51	12.54	12.28	12.78
AMT	PIK3R4	614	740	666	498	403	0.192	9.69	9.82	9.84	9.80	11.69	10.41	10.01	10.07	9.67	10.05
CMBL	PIK3R4	77	702	635	916	75	0.135	7.17	9.82	9.51	9.80	12.25	10.41	8.09	10.07	12.16	10.05
NAAA	PIK3R4	865	903	920	874	885	0.076	11.23	9.82	8.10	9.80	10.67	10.41	9.41	10.07	8.49	10.05
PCBD1	PIK3R4	406	463	969	937	641	0.649	9.09	9.82	10.21	9.80	13.15	10.41	10.08	10.07	10.65	10.05
CHAMP1	PIM1	548	337	798	268	479	0.572	8.92	13.47	8.41	8.59	9.66	11.22	8.71	11.77	9.62	10.68
LYSMD2	PIM3	705	520	798	530	109	0.469	9.64	12.61	10.03	10.42	8.80	12.16	8.20	12.85	8.43	12.24
PECR	PINK1	839	585	730	903	800	0.072	9.87	12.62	6.19	13.91	11.62	12.47	7.03	11.10	7.21	14.15
ASAH1	PIP4K2A	228	275	935	659	468	0.790	13.59	12.81	11.48	12.30	11.36	9.82	13.46	11.13	11.86	8.83
C15orf57	PIP4K2A	457	400	828	821	884	0.332	9.31	12.81	7.99	12.30	8.16	9.82	7.95	11.13	9.28	8.83
FAM49B	PIP4K2A	202	229	995	822	787	0.685	13.43	12.81	11.32	12.30	9.50	9.82	10.84	11.13	10.69	8.83
GPD2	PIP4K2A	705	200	977	890	554	0.629	10.15	12.81	10.51	12.30	8.40	9.82	10.24	11.13	11.19	8.83
C17orf103	PIP4K2B	636	806	819	790	870	0.113	12.61	10.93	8.88	14.01	9.04	11.04	9.70	11.64	11.60	12.85
HIST1H2AC	PIP4K2C	499	154	883	40	785	0.624	13.01	10.73	8.29	11.53	10.98	9.96	9.89	10.34	10.03	9.87
APH1B	PJA1	30	616	995	835	854	0.588	10.85	9.09	9.34	11.17	7.64	8.48	9.53	9.58	8.68	8.82
CTSC	PJA1	365	555	971	730	783	0.658	12.74	9.09	6.93	11.17	10.18	8.48	12.96	9.58	9.13	8.82
ENTPD1	PJA1	38	794	937	849	877	0.364	12.63	9.09	10.25	11.17	9.37	8.48	11.59	9.58	9.95	8.82
ACBD4	PLA2G12A	740	795	745	828	650	0.050	9.57	8.77	9.65	10.15	12.12	10.90	8.77	9.63	8.55	10.89
CROT	PLA2G12A	925	947	955	974	876	0.059	7.98	8.77	8.24	10.15	9.97	10.90	8.17	9.63	9.40	10.89
GNPNAT1	PLA2G12A	933	914	948	842	582	0.261	7.19	8.77	6.79	10.15	10.26	10.90	7.43	9.63	8.76	10.89
ISOC2	PLA2G12A	463	655	688	893	919	0.111	9.22	8.77	10.03	10.15	12.79	10.90	9.22	9.63	10.72	10.89
ARID5B	PLAUR	748	615	965	724	101	0.636	10.64	13.19	10.33	5.76	9.28	7.02	11.63	11.09	13.34	7.05
FLJ10038	PLCG2	101	108	96	50	47	0.000	0.00	12.81	0.00	6.37	0.00	10.13	0.00	10.12	0.00	7.83
ERO1L	PLEKHA1	462	949	994	660	957	0.455	12.28	9.27	10.03	11.53	11.56	11.44	10.78	11.15	9.95	11.27
ADM	PLEKHB2	712	37	985	348	215	0.864	12.97	12.30	7.41	12.85	10.45	10.93	12.16	12.35	10.85	11.64
ARID5B	PLEKHB2	751	843	927	552	824	0.369	10.64	12.30	10.33	12.85	9.28	10.93	11.63	12.35	13.34	11.64
BAG3	PLEKHB2	164	6	869	596	919	0.505	10.13	12.30	10.80	12.85	10.72	10.93	11.79	12.35	14.54	11.64
IQGAP1	PLEKHO1	174	24	969	309	291	0.938	14.25	12.21	10.93	11.21	10.17	8.79	13.94	11.24	12.39	10.85
DPH2	PLIN3	326	107	950	890	869	0.520	9.68	12.37	9.57	8.66	9.74	9.53	9.04	10.01	10.95	11.92
ATP2B4	PLP2	769	189	999	555	501	0.836	12.47	13.24	12.63	5.88	11.68	8.30	13.52	11.00	10.86	10.35
ATP8B2	PLP2	80	238	898	663	793	0.568	10.92	13.24	10.81	5.88	8.87	8.30	11.69	11.00	9.04	10.35
C12orf49	PLP2	714	211	1000	903	776	0.553	9.22	13.24	9.36	5.88	8.49	8.30	10.34	11.00	7.84	10.35
JAM3	PLP2	348	219	765	351	726	0.417	8.47	13.24	10.95	5.88	7.93	8.30	11.29	11.00	9.16	10.35
KCTD10	PLP2	320	336	969	838	923	0.557	10.70	13.24	10.51	5.88	9.97	8.30	12.14	11.00	10.21	10.35
LEPROTL1	PLP2	439	183	995	803	502	0.838	11.33	13.24	10.27	5.88	10.06	8.30	10.34	11.00	9.47	10.35
MFSD6	PLP2	109	3	970	752	665	0.732	9.53	13.24	11.69	5.88	7.46	8.30	10.86	11.00	8.85	10.35
ABCC1	PLXDC2	290	543	958	490	423	0.894	10.87	11.80	8.72	9.34	8.42	8.47	11.69	12.68	11.54	10.08
MTMR2	PLXDC2	179	906	991	828	892	0.419	9.03	11.80	10.41	9.34	8.18	8.47	10.30	12.68	9.30	10.08
PFKM	PLXDC2	152	488	973	561	492	0.915	9.45	11.80	13.10	9.34	8.86	8.47	10.81	12.68	15.56	10.08
ARHGEF2	PLXNA1	331	893	972	779	651	0.532	13.10	8.93	12.37	12.92	9.42	9.35	13.07	12.18	10.25	11.18
MARCKSL1	PLXNA1	878	70	959	396	745	0.607	10.75	8.93	13.13	12.92	10.07	9.35	10.43	12.18	8.49	11.18
ARHGEF10L	PLXNB1	675	231	890	700	516	0.585	9.47	8.08	11.06	12.93	13.76	13.85	10.93	12.57	12.34	9.15
OXER1	PMM1	619	233	463	492	674	0.000	10.36	9.88	3.80	10.77	10.57	11.02	5.38	10.05	5.36	8.88
CCDC167	PNKD	637	636	920	759	957	0.364	8.61	11.20	7.29	12.28	9.20	13.49	6.59	11.47	7.87	10.04
MPZL1	PNMA1	422	590	999	865	565	0.738	11.41	9.65	10.19	12.96	10.54	7.99	11.97	9.87	10.09	9.47
ADIPOR2	POFUT1	892	624	931	680	928	0.300	11.66	9.70	11.71	9.18	12.99	11.90	12.53	10.56	11.90	10.58
AKAP1	POFUT1	988	905	984	937	864	0.123	9.26	9.70	11.42	9.18	12.35	11.90	11.05	10.56	13.22	10.58
CAPN5	POLD2	809	740	663	552	366	0.137	9.12	10.09	10.52	10.84	12.54	12.14	8.83	10.61	7.59	11.92
CNNM3	POLD2	861	791	852	660	858	0.127	9.86	10.09	8.93	10.84	10.56	12.14	9.25	10.61	10.12	11.92
CTIF	POLD2	620	792	529	682	828	0.000	9.55	10.09	13.07	10.84	11.94	12.14	11.26	10.61	10.87	11.92
FURIN	POLD2	34	748	786	741	643	0.256	13.70	10.09	11.52	10.84	14.78	12.14	13.13	10.61	12.28	11.92
GPER1	POLD2	15	473	593	382	515	0.178	8.66	10.09	9.21	10.84	10.27	12.14	8.09	10.61	7.12	11.92
HNF1A	POLD2	578	557	804	874	529	0.374	5.33	10.09	5.92	10.84	11.10	12.14	3.12	10.61	4.51	11.92
ACBD4	POLDIP2	882	941	789	585	662	0.166	9.57	11.32	9.65	12.00	12.12	13.32	8.77	11.13	8.55	13.46
CHDH	POLDIP2	367	178	849	854	830	0.358	6.05	11.32	10.17	12.00	12.42	13.32	7.98	11.13	9.09	13.46
GPER1	POLDIP2	626	265	525	457	653	0.025	8.66	11.32	9.21	12.00	10.27	13.32	8.09	11.13	7.12	13.46
KLC4	POLDIP2	991	977	862	852	921	0.005	9.87	11.32	10.43	12.00	12.39	13.32	9.42	11.13	9.92	13.46
NUPR1	POLDIP2	114	5	632	920	679	0.132	7.17	11.32	8.81	12.00	13.21	13.32	12.42	11.13	10.94	13.46
IRAK2	POLR1C	443	635	921	56	886	0.582	9.33	8.59	7.02	8.24	9.60	9.06	9.10	8.15	10.10	8.75
LMNA	POLR1C	464	283	946	598	965	0.620	10.66	8.59	10.60	8.24	12.56	9.06	14.09	8.15	13.27	8.75
GJB1	POLR2E	101	267	931	558	47	0.833	3.11	12.07	7.86	12.36	13.76	12.82	2.71	11.64	1.73	12.04
C2	POLR2F	371	529	869	586	235	0.680	8.88	9.90	6.16	10.74	14.70	10.64	11.67	9.28	7.04	10.44
APOO	PON2	634	154	915	679	451	0.673	8.02	8.34	9.77	12.59	8.10	12.88	6.73	12.64	9.50	9.48
COX7B	PON2	670	248	921	787	425	0.614	9.67	8.34	11.66	12.59	11.90	12.88	10.71	12.64	13.03	9.48
GPI	PON2	307	33	862	714	404	0.617	13.03	8.34	14.71	12.59	13.66	12.88	12.81	12.64	13.98	9.48
MRPL27	PON2	734	243	905	837	825	0.362	9.23	8.34	10.17	12.59	10.64	12.88	9.07	12.64	10.82	9.48
NDUFA12	PON2	773	336	891	954	681	0.359	10.05	8.34	10.52	12.59	9.97	12.88	9.63	12.64	11.80	9.48
NDUFA4	PON2	610	155	919	886	366	0.590	10.70	8.34	14.15	12.59	12.68	12.88	12.19	12.64	14.23	9.48
OPTN	PON2	277	71	875	112	613	0.694	11.80	8.34	12.50	12.59	11.85	12.88	12.19	12.64	15.22	9.48
ISCA1	POR	97	674	979	729	523	0.745	10.22	13.13	10.89	10.94	10.15	14.66	9.47	12.40	11.43	11.45
LIMK2	PPA1	214	327	990	607	801	0.776	13.94	10.19	10.25	12.09	10.80	11.77	12.07	12.29	10.38	11.73
ACBD4	PPARA	821	293	899	831	62	0.472	9.57	8.94	9.65	9.66	12.12	13.10	8.77	9.38	8.55	11.84
ACAA2	PPFIBP2	824	295	729	486	125	0.344	10.80	9.57	10.82	8.98	14.63	11.39	10.90	9.43	12.47	10.26
ACBD4	PPFIBP2	886	219	804	939	885	0.152	9.57	9.57	9.65	8.98	12.12	11.39	8.77	9.43	8.55	10.26
MPZL1	PPIL1	413	721	993	918	518	0.657	11.41	8.36	10.19	9.75	10.54	9.40	11.97	8.32	10.09	9.31
BTD	PPM1A	346	669	931	917	583	0.527	9.28	12.12	7.18	11.65	10.43	11.58	8.15	11.31	8.63	12.90
IDNK	PPM1A	617	517	870	847	144	0.499	8.98	12.12	8.44	11.65	9.67	11.58	6.55	11.31	6.39	12.90
PECR	PPM1A	784	722	875	761	149	0.366	9.87	12.12	6.19	11.65	11.62	11.58	7.03	11.31	7.21	12.90
DTNBP1	PPM1M	710	913	834	948	789	0.085	10.42	12.92	10.14	9.57	8.18	8.64	8.95	10.78	9.65	8.36
CELF2	PPP1R18	876	91	646	421	832	0.146	13.59	14.56	12.90	9.07	8.49	10.62	12.77	12.62	11.43	9.99
GPER1	PPP1R3E	198	35	896	660	436	0.712	8.66	10.15	9.21	10.97	10.27	9.74	8.09	8.91	7.12	10.29
FAM89A	PPP2CA	930	324	978	840	618	0.512	8.31	12.29	6.69	12.59	7.82	11.82	8.85	11.98	7.09	12.39
PLSCR1	PPP2R5E	648	107	992	816	417	0.752	12.24	10.24	8.14	10.28	10.68	10.19	11.38	10.37	9.03	10.96
DYNLT1	PPP3CC	50	650	987	851	874	0.536	11.88	9.98	9.02	8.56	10.40	8.59	11.18	9.74	10.98	11.71
CIAPIN1	PPP4R1	653	683	995	991	928	0.362	10.19	12.19	10.37	10.61	10.27	10.38	9.97	12.05	10.77	10.68
DCAF4	PPP4R1	316	652	954	952	950	0.381	8.39	12.19	8.71	10.61	8.69	10.38	7.96	12.05	9.63	10.68
ENTPD6	PPP4R1	312	554	944	853	968	0.463	10.91	12.19	12.88	10.61	11.71	10.38	11.62	12.05	11.22	10.68
GMPS	PPP4R1	154	815	998	977	1000	0.351	10.35	12.19	10.20	10.61	9.93	10.38	10.53	12.05	10.51	10.68
ITPA	PPP4R1	324	646	900	927	937	0.327	10.18	12.19	9.44	10.61	10.03	10.38	9.46	12.05	9.50	10.68
CASC10	PPP6R2	101	288	674	630	284	0.283	2.58	11.72	8.36	12.05	8.98	12.69	4.65	11.62	4.14	12.24
GPER1	PPP6R2	552	133	845	438	578	0.625	8.66	11.72	9.21	12.05	10.27	12.69	8.09	11.62	7.12	12.24
PER3	PPP6R2	433	645	790	615	317	0.450	7.20	11.72	10.45	12.05	10.57	12.69	9.32	11.62	10.18	12.24
ICAM2	PPT1	66	335	994	649	772	0.777	10.62	13.46	6.48	12.38	6.26	9.82	9.55	12.37	8.59	10.06
ADHFE1	PQLC1	18	214	729	409	7	0.458	8.66	12.31	9.62	12.42	12.15	13.59	9.00	11.51	11.31	12.16
CROT	PRDX3	781	941	972	980	858	0.168	7.98	11.24	8.24	11.72	9.97	13.67	8.17	11.46	9.40	13.33
ARHGDIB	PRF1	2	195	660	618	682	0.181	16.50	13.10	8.63	3.80	10.52	8.16	13.01	9.65	10.22	6.44
CXCL16	PRF1	75	256	262	345	755	0.000	12.71	13.10	8.06	3.80	10.43	8.16	12.24	9.65	6.89	6.44
NAGK	PRF1	50	107	740	559	673	0.364	12.57	13.10	10.57	3.80	10.12	8.16	10.91	9.65	9.93	6.44
ARHGEF10	PRICKLE1	385	49	749	606	874	0.321	7.28	5.73	10.76	8.28	8.43	5.10	12.15	7.32	9.12	6.78
BCL2	PRICKLE1	487	282	977	724	728	0.728	10.02	5.73	9.58	8.28	7.28	5.10	8.96	7.32	10.41	6.78
ITM2C	PRICKLE1	353	278	946	494	894	0.695	10.54	5.73	15.87	8.28	10.68	5.10	11.03	7.32	9.50	6.78
ALAD	PRKAB2	844	753	949	814	847	0.269	10.83	9.42	12.12	10.35	13.07	12.18	10.56	10.52	10.62	13.24
GPER1	PRKAB2	298	59	922	371	464	0.844	8.66	9.42	9.21	10.35	10.27	12.18	8.09	10.52	7.12	13.24
ITPR2	PRKAB2	922	353	763	624	788	0.201	10.24	9.42	9.82	10.35	11.55	12.18	9.84	10.52	8.97	13.24
MPC2	PRKAB2	831	722	610	736	878	0.000	9.96	9.42	10.96	10.35	12.34	12.18	9.22	10.52	11.48	13.24
NCOA3	PRKACB	786	881	947	745	569	0.404	11.58	10.35	9.23	13.28	10.46	9.68	11.82	9.36	11.95	9.07
AK3	PRKAG2	939	429	661	843	492	0.161	9.79	9.86	11.03	10.44	12.78	11.13	11.16	9.85	12.93	9.61
DIP2C	PRKAG2	802	900	888	971	348	0.237	6.76	9.86	11.03	10.44	10.38	11.13	9.73	9.85	11.82	9.61
GALNT2	PRKCE	198	743	730	197	886	0.230	11.49	9.37	10.54	11.45	13.07	9.42	11.43	11.54	12.23	9.81
AMICA1	PRMT2	938	84	971	877	837	0.366	13.99	12.05	3.15	11.90	8.01	9.70	10.35	11.32	5.76	9.84
MANF	PRRC1	846	530	990	879	868	0.418	10.61	9.78	8.90	8.79	11.72	11.24	10.70	10.75	8.86	10.12
FAR1	PRSS23	31	323	925	580	205	0.810	11.68	8.99	11.30	7.83	8.50	9.07	11.70	12.44	10.98	9.79
ITGA6	PSMA6	321	431	973	392	385	0.946	9.80	11.35	10.03	11.07	9.60	11.59	11.64	11.81	10.73	12.68
ITGA6	PSMD1	475	152	962	510	387	0.919	9.80	11.26	10.03	12.07	9.60	11.57	11.64	11.53	10.73	13.23
MPZL1	PSMD10	766	871	987	968	903	0.220	11.41	9.47	10.19	10.35	10.54	9.51	11.97	9.60	10.09	9.45
MPZL1	PSMD14	306	781	995	971	251	0.614	11.41	9.54	10.19	10.62	10.54	10.28	11.97	9.84	10.09	11.86
ATP6V0E1	PSMD2	758	191	1000	999	993	0.375	13.70	12.21	10.28	12.84	12.07	12.22	12.66	12.59	11.79	14.17
MPZL1	PSMD2	639	608	990	992	331	0.612	11.41	12.21	10.19	12.84	10.54	12.22	11.97	12.59	10.09	14.17
GNA12	PSMD7	289	41	997	982	928	0.539	11.18	11.09	12.20	11.01	10.58	10.97	11.64	10.66	10.36	12.58
KIAA1430	PSME3	408	877	996	969	980	0.329	8.88	11.82	8.99	11.28	10.43	11.17	10.08	11.33	9.73	11.69
AKT3	PTGDS	735	6	667	548	115	0.227	9.09	10.48	11.69	15.98	8.17	9.68	10.97	13.35	9.55	10.22
ANK3	PTGDS	371	44	935	7	60	0.870	7.81	10.48	12.43	15.98	9.32	9.68	9.27	13.35	11.64	10.22
CCDC109B	PTGDS	350	420	556	164	529	0.098	10.24	10.48	5.46	15.98	6.05	9.68	8.12	13.35	6.87	10.22
METTL9	PTGDS	6	157	402	307	228	0.000	13.32	10.48	11.71	15.98	9.29	9.68	11.21	13.35	11.61	10.22
PAM	PTGDS	84	18	644	230	394	0.288	10.75	10.48	11.67	15.98	9.43	9.68	12.84	13.35	12.91	10.22
PHC1	PTGDS	824	38	743	349	104	0.364	8.12	10.48	9.12	15.98	7.01	9.68	8.51	13.35	8.50	10.22
CD59	PTGFRN	192	578	999	456	490	0.959	12.06	6.90	13.27	9.55	12.66	9.94	15.08	9.72	13.88	8.40
CYSTM1	PTGFRN	115	602	913	429	87	0.775	13.01	6.90	10.56	9.55	10.17	9.94	11.46	9.72	12.44	8.40
KIF5B	PTGFRN	454	125	985	561	91	0.940	11.40	6.90	13.43	9.55	11.47	9.94	12.93	9.72	13.09	8.40
LEPROTL1	PTGFRN	451	956	997	620	533	0.690	11.33	6.90	10.27	9.55	10.06	9.94	10.34	9.72	9.47	8.40
CISD3	PTOV1	801	731	942	751	894	0.295	9.61	10.87	9.44	11.25	11.98	10.67	8.97	10.03	9.98	11.17
CDKN1A	PTRH2	17	283	765	224	927	0.398	11.53	8.95	9.70	8.36	12.43	9.38	13.29	7.97	12.99	9.06
EHD4	PTRH2	596	374	978	896	818	0.551	10.39	8.95	7.45	8.36	9.74	9.38	10.94	7.97	9.25	9.06
PPP4R1	PTRH2	875	803	985	955	974	0.167	12.19	8.95	10.61	8.36	10.38	9.38	12.05	7.97	10.68	9.06
ACSL5	PTS	776	88	762	827	579	0.223	10.94	7.24	8.33	9.02	12.76	10.36	11.40	7.59	8.25	9.73
C12orf49	PUS1	829	448	915	772	947	0.322	9.22	9.54	9.36	8.78	8.49	9.99	10.34	8.48	7.84	9.13
C16orf45	PXMP2	675	502	874	424	679	0.570	8.03	8.08	13.31	8.38	9.72	12.52	9.12	7.60	11.79	9.78
CNNM3	PXMP2	604	464	939	916	687	0.524	9.86	8.08	8.93	8.38	10.56	12.52	9.25	7.60	10.12	9.78
GAMT	PXMP2	792	620	925	491	414	0.644	8.45	8.08	10.48	8.38	13.88	12.52	6.91	7.60	13.72	9.78
IGF1	PXMP2	595	389	645	224	84	0.242	5.41	8.08	5.91	8.38	11.82	12.52	9.51	7.60	9.58	9.78
MAP2K1	PXMP2	498	487	734	742	693	0.255	11.38	8.08	11.60	8.38	11.51	12.52	10.88	7.60	11.86	9.78
MICU1	PXMP2	419	543	998	949	648	0.676	11.89	8.08	11.75	8.38	11.68	12.52	10.82	7.60	11.83	9.78
PLP2	PYGB	407	321	954	946	740	0.565	13.24	11.26	5.88	13.60	8.30	10.45	11.00	12.05	10.35	10.72
CMBL	QDPR	350	148	995	976	885	0.559	7.17	9.09	9.51	13.37	12.25	12.86	8.09	9.44	12.16	10.77
DBT	QDPR	876	363	982	973	545	0.517	8.72	9.09	9.65	13.37	11.34	12.86	9.25	9.44	10.85	10.77
ESR1	QDPR	550	420	977	326	910	0.724	7.01	9.09	4.99	13.37	10.12	12.86	7.68	9.44	8.20	10.77
AEBP1	QSOX1	119	65	950	417	38	0.900	9.24	13.12	11.07	11.05	11.28	11.91	14.79	14.38	10.88	12.07
AKT3	QSOX1	161	953	994	463	483	0.761	9.09	13.12	11.69	11.05	8.17	11.91	10.97	14.38	9.55	12.07
ANK3	QSOX1	171	891	863	810	362	0.390	7.81	13.12	12.43	11.05	9.32	11.91	9.27	14.38	11.64	12.07
CDKN1C	QSOX1	58	524	805	368	605	0.545	8.97	13.12	8.57	11.05	7.84	11.91	9.89	14.38	10.60	12.07
COL1A1	QSOX1	58	129	991	575	2	0.945	8.40	13.12	6.87	11.05	11.90	11.91	14.71	14.38	10.66	12.07
CTSK	QSOX1	767	668	569	382	47	0.069	9.37	13.12	6.74	11.05	8.27	11.91	10.25	14.38	9.04	12.07
FSTL1	QSOX1	254	265	996	792	83	0.846	8.75	13.12	10.39	11.05	11.17	11.91	14.56	14.38	11.59	12.07
GRK5	QSOX1	398	808	959	353	230	0.764	10.32	13.12	9.23	11.05	9.60	11.91	12.38	14.38	9.63	12.07
IGFBP7	QSOX1	654	81	984	534	52	0.874	10.42	13.12	11.28	11.05	12.67	11.91	14.10	14.38	11.84	12.07
IGLL5	QSOX1	71	108	617	123	47	0.234	6.74	13.12	0.05	11.05	2.57	11.91	2.73	14.38	0.34	12.07
ITGB5	QSOX1	459	60	828	812	564	0.468	9.80	13.12	10.23	11.05	12.45	11.91	12.66	14.38	11.23	12.07
LBH	QSOX1	93	616	936	680	226	0.724	10.01	13.12	6.27	11.05	7.61	11.91	11.41	14.38	8.17	12.07
PRICKLE1	QSOX1	418	924	854	509	1	0.526	5.73	13.12	8.28	11.05	5.10	11.91	7.32	14.38	6.78	12.07
PRSS23	QSOX1	21	504	993	622	1	0.923	8.99	13.12	7.83	11.05	9.07	11.91	12.44	14.38	9.79	12.07
BNIP3	RAB11B-AS1	271	94	226	698	621	0.000	9.50	4.88	11.44	3.52	12.07	7.20	9.81	3.71	12.63	5.91
DCAF11	RAB11B-AS1	538	209	726	944	511	0.315	12.42	4.88	12.33	3.52	13.56	7.20	11.24	3.71	12.31	5.91
GPER1	RAB11B-AS1	539	287	690	544	319	0.339	8.66	4.88	9.21	3.52	10.27	7.20	8.09	3.71	7.12	5.91
NAPEPLD	RAB11B-AS1	643	155	584	812	347	0.084	8.32	4.88	10.74	3.52	9.87	7.20	8.71	3.71	9.20	5.91
PXMP2	RAB11B-AS1	502	318	804	910	714	0.348	8.08	4.88	8.38	3.52	12.52	7.20	7.60	3.71	9.78	5.91
DUSP23	RAB15	536	60	984	571	81	0.914	9.58	8.48	7.61	12.97	11.29	10.80	9.44	9.67	9.64	9.33
ABCC1	RAB31	195	12	995	915	203	0.782	10.87	12.98	8.72	12.76	8.42	8.06	11.69	12.40	11.54	9.03
ARID5B	RAB31	185	409	840	716	439	0.572	10.64	12.98	10.33	12.76	9.28	8.06	11.63	12.40	13.34	9.03
C4orf48	RAB31	470	82	940	374	495	0.880	7.94	12.98	8.06	12.76	4.49	8.06	4.56	12.40	3.35	9.03
DTNBP1	RAB31	614	552	919	869	545	0.548	10.42	12.98	10.14	12.76	8.18	8.06	8.95	12.40	9.65	9.03
ENDOD1	RAB31	381	342	997	698	240	0.895	9.80	12.98	11.39	12.76	8.75	8.06	10.75	12.40	11.57	9.03
HSPA14	RAB31	715	270	849	966	701	0.316	9.38	12.98	8.99	12.76	9.18	8.06	9.11	12.40	10.15	9.03
ANK3	RAB34	394	1	888	626	356	0.713	7.81	9.98	12.43	9.24	9.32	7.78	9.27	11.05	11.64	8.81
ANXA11	RAB34	699	161	945	978	783	0.426	14.17	9.98	12.34	9.24	11.72	7.78	13.42	11.05	13.41	8.81
FAR1	RAB34	509	65	982	783	806	0.665	11.68	9.98	11.30	9.24	8.50	7.78	11.70	11.05	10.98	8.81
LTB	RAB34	585	484	593	354	533	0.127	12.40	9.98	3.61	9.24	6.30	7.78	6.57	11.05	3.95	8.81
DTNBP1	RAB8B	751	794	986	789	594	0.508	10.42	12.41	10.14	9.45	8.18	9.37	8.95	11.64	9.65	9.39
GNA12	RABIF	70	38	994	722	955	0.649	11.18	9.98	12.20	8.95	10.58	8.17	11.64	7.49	10.36	8.29
ITGA6	RAC1	214	582	970	780	664	0.677	9.80	12.64	10.03	13.25	9.60	12.45	11.64	13.29	10.73	12.94
DCTN5	RAC2	774	335	838	751	467	0.413	10.98	14.31	10.36	4.08	10.23	7.38	10.54	9.57	10.67	5.51
PAQR8	RAC2	679	157	963	637	756	0.640	9.07	14.31	12.50	4.08	5.89	7.38	8.07	9.57	6.60	5.51
PDE7A	RAC2	511	187	867	515	56	0.721	11.40	14.31	9.13	4.08	8.66	7.38	10.77	9.57	12.02	5.51
CTNNA1	RALA	678	879	978	891	958	0.253	12.33	9.80	12.78	10.34	12.76	9.82	14.43	11.38	12.86	10.10
GNS	RALA	775	975	917	743	945	0.158	13.48	9.80	10.62	10.34	11.77	9.82	13.23	11.38	11.76	10.10
KIAA1147	RALGAPA2	128	788	988	606	647	0.706	9.94	12.20	11.56	9.86	11.46	12.50	11.50	12.57	10.07	12.29
MPZL1	RAN	248	725	1000	993	829	0.476	11.41	11.59	10.19	12.57	10.54	12.05	11.97	12.59	10.09	12.74
MPZL1	RAP2A	100	643	994	829	763	0.621	11.41	9.33	10.19	12.16	10.54	9.35	11.97	10.57	10.09	10.11
ABCC1	RAP2B	953	770	902	834	149	0.301	10.87	11.07	8.72	8.42	8.42	9.03	11.69	9.95	11.54	7.85
APH1B	RAP2B	377	595	966	781	890	0.549	10.85	11.07	9.34	8.42	7.64	9.03	9.53	9.95	8.68	7.85
PREX1	RAP2B	573	117	818	538	494	0.581	14.71	11.07	12.88	8.42	9.37	9.03	13.12	9.95	10.23	7.85
CLIP4	RASSF3	545	565	793	624	21	0.469	9.90	12.35	10.67	7.53	8.37	8.62	11.16	11.14	12.72	9.47
DNM1L	RASSF3	722	744	941	880	719	0.349	10.21	12.35	12.33	7.53	10.10	8.62	11.16	11.14	11.68	9.47
PTGFRN	RASSF3	326	730	901	419	678	0.598	6.90	12.35	9.55	7.53	9.94	8.62	9.72	11.14	8.40	9.47
NAAA	RBL2	784	837	932	908	734	0.233	11.23	12.35	8.10	10.82	10.67	11.95	9.41	12.15	8.49	11.79
RAB32	RBM34	597	635	997	971	505	0.640	11.88	7.65	5.73	6.15	9.93	6.54	9.72	5.97	7.24	8.18
PFKM	RCBTB2	359	791	977	826	638	0.577	9.45	10.89	13.10	8.74	8.86	9.02	10.81	9.37	15.56	9.00
N4BP2L1	RCL1	739	914	729	115	630	0.164	10.06	8.85	10.59	7.36	11.78	11.80	10.26	9.22	9.36	9.56
PRKAG2	RCL1	568	748	713	901	395	0.179	9.86	8.85	10.44	7.36	11.13	11.80	9.85	9.22	9.61	9.56
GNA12	RCN2	397	88	967	873	651	0.672	11.18	8.68	12.20	10.87	10.58	9.32	11.64	10.30	10.36	10.63
CCND3	RELL1	819	557	829	519	208	0.461	14.09	8.76	11.74	5.04	9.88	5.60	12.72	6.87	9.70	7.43
PDP1	RELL1	799	54	919	164	453	0.689	8.66	8.76	11.76	5.04	7.82	5.60	9.24	6.87	9.83	7.43
MAST3	REPIN1	754	526	918	579	727	0.543	13.15	11.27	13.48	11.97	10.84	12.58	10.19	11.34	8.39	12.88
CKAP4	REXO4	210	840	946	701	857	0.443	12.66	9.93	9.58	9.84	10.97	10.17	11.53	9.09	10.05	10.81
CASC10	RFNG	101	548	971	814	299	0.761	2.58	10.84	8.36	10.62	8.98	11.97	4.65	10.20	4.14	10.79
GPER1	RFNG	241	347	905	600	640	0.690	8.66	10.84	9.21	10.62	10.27	11.97	8.09	10.20	7.12	10.79
HNF1A	RFNG	622	619	920	806	785	0.424	5.33	10.84	5.92	10.62	11.10	11.97	3.12	10.20	4.51	10.79
NUDT16	RFNG	237	642	196	608	631	0.000	11.71	10.84	12.01	10.62	12.06	11.97	11.74	10.20	11.21	10.79
CELF2	RGS19	962	696	864	550	715	0.316	13.59	13.08	12.90	7.21	8.49	7.60	12.77	9.47	11.43	6.86
HDAC9	RGS19	186	585	705	72	49	0.367	8.49	13.08	9.53	7.21	5.65	7.60	7.21	9.47	8.21	6.86
PAQR8	RGS19	826	104	961	824	771	0.462	9.07	13.08	12.50	7.21	5.89	7.60	8.07	9.47	6.60	6.86
PIK3IP1	RGS19	390	333	658	122	284	0.316	12.53	13.08	10.82	7.21	8.54	7.60	11.76	9.47	10.04	6.86
FBXO31	RHBG	0	464	443	0	0	0.000	10.20	1.84	11.80	1.15	11.82	7.64	10.58	0.76	12.48	0.63
ITPR2	RHBG	0	22	647	0	0	0.000	10.24	1.84	9.82	1.15	11.55	7.64	9.84	0.76	8.97	0.63
ELOVL1	RHNO1	384	268	979	971	593	0.676	11.88	9.03	10.42	8.76	10.69	7.39	11.54	7.85	9.80	8.34
DTNBP1	RHOG	782	119	993	924	967	0.400	10.42	15.09	10.14	9.20	8.18	10.00	8.95	11.59	9.65	10.50
LPCAT1	RHOG	290	110	988	618	754	0.790	13.23	15.09	11.33	9.20	9.78	10.00	13.90	11.59	8.88	10.50
CCND3	RHOQ	827	738	969	582	229	0.615	14.09	10.93	11.74	10.93	9.88	9.91	12.72	11.66	9.70	12.70
HN1	RHOQ	648	167	977	479	268	0.880	12.51	10.93	10.72	10.93	9.27	9.91	9.83	11.66	10.96	12.70
LPCAT1	RHOQ	714	597	988	124	278	0.821	13.23	10.93	11.33	10.93	9.78	9.91	13.90	11.66	8.88	12.70
DENND5A	RIOK1	584	759	996	702	983	0.478	13.06	9.40	12.69	8.11	10.39	8.89	12.32	9.10	11.13	9.95
RALGDS	RIOK1	504	557	871	501	886	0.525	12.05	9.40	13.20	8.11	10.35	8.89	12.78	9.10	11.64	9.95
BICD2	RIPK2	120	728	930	712	446	0.640	11.56	10.35	10.60	7.45	10.01	8.20	11.23	9.32	11.16	6.96
FURIN	RMDN3	9	861	969	819	923	0.387	13.70	9.92	11.52	11.33	14.78	11.25	13.13	10.93	12.28	10.09
OAF	RMDN3	381	359	642	274	199	0.284	9.16	9.92	10.42	11.33	14.25	11.25	9.44	10.93	9.03	10.09
KLHDC2	RMND5A	981	947	960	975	954	0.009	10.24	11.35	11.19	11.21	11.89	11.90	10.48	10.41	11.83	12.75
MARC1	RMND5A	788	531	914	857	399	0.490	11.50	11.35	8.34	11.21	11.33	11.90	8.39	10.41	8.33	12.75
ARPC2	RNASE1	414	258	986	749	692	0.751	14.63	10.35	12.36	11.08	11.91	9.03	13.74	14.14	13.04	10.81
BLVRA	RNASE1	468	220	996	936	780	0.634	10.54	10.35	9.62	11.08	6.99	9.03	10.47	14.14	10.30	10.81
CTSC	RNASE1	513	168	961	805	689	0.668	12.74	10.35	6.93	11.08	10.18	9.03	12.96	14.14	9.13	10.81
HN1	RNASE1	484	68	959	854	639	0.671	12.51	10.35	10.72	11.08	9.27	9.03	9.83	14.14	10.96	10.81
LIMA1	RNASE1	113	570	925	206	764	0.683	8.49	10.35	9.48	11.08	9.96	9.03	12.67	14.14	10.69	10.81
MYO5A	RNASE1	200	153	965	663	692	0.752	11.30	10.35	13.52	11.08	8.39	9.03	10.50	14.14	10.41	10.81
PDP1	RNASE1	154	80	950	781	407	0.759	8.66	10.35	11.76	11.08	7.82	9.03	9.24	14.14	9.83	10.81
PFKP	RNASE1	131	289	911	262	146	0.822	10.85	10.35	13.22	11.08	7.82	9.03	10.46	14.14	11.33	10.81
PRSS23	RNASE1	41	129	957	347	252	0.914	8.99	10.35	7.83	11.08	9.07	9.03	12.44	14.14	9.79	10.81
AP1S2	RNASET2	606	558	896	889	574	0.478	10.84	13.79	10.40	9.71	8.09	9.66	9.86	10.71	11.74	7.84
BLVRA	RNASET2	680	539	962	801	838	0.495	10.54	13.79	9.62	9.71	6.99	9.66	10.47	10.71	10.30	7.84
EHD4	RNF10	155	356	995	897	377	0.791	10.39	14.96	7.45	12.81	9.74	12.50	10.94	12.99	9.25	14.17
DBT	RNF130	587	747	975	922	766	0.439	8.72	13.16	9.65	12.26	11.34	12.60	9.25	11.80	10.85	11.12
DNAJC19	RNF130	401	802	986	980	932	0.365	8.17	13.16	9.61	12.26	10.30	12.60	8.61	11.80	10.86	11.12
PCYOX1	RNF130	834	859	989	894	643	0.363	9.21	13.16	11.07	12.26	12.34	12.60	11.71	11.80	11.60	11.12
PIK3R4	RNF130	816	888	990	953	785	0.259	9.82	13.16	9.80	12.26	10.41	12.60	10.07	11.80	10.05	11.12
LBH	RNF135	53	4	726	659	556	0.344	10.01	11.17	6.27	6.66	7.61	8.31	11.41	9.67	8.17	8.64
ABCC1	RNF145	521	983	968	850	302	0.516	10.87	11.69	8.72	11.21	8.42	9.81	11.69	12.95	11.54	10.01
LYAR	RNF145	422	623	938	822	870	0.469	10.03	11.69	6.62	11.21	8.42	9.81	8.50	12.95	9.59	10.01
RASSF1	RNF145	372	557	872	299	900	0.529	12.08	11.69	9.39	11.21	9.89	9.81	11.61	12.95	10.27	10.01
GCAT	RORC	326	254	780	602	111	0.509	7.68	8.06	9.53	2.25	10.69	12.67	7.04	8.15	9.20	12.95
GLRX5	RORC	62	74	355	677	295	0.000	11.37	8.06	10.61	2.25	11.38	12.67	9.48	8.15	11.56	12.95
KIAA2018	RORC	349	423	498	765	557	0.000	10.01	8.06	9.27	2.25	10.57	12.67	9.58	8.15	11.26	12.95
MPND	RORC	671	81	957	680	360	0.739	9.56	8.06	9.25	2.25	9.54	12.67	7.68	8.15	8.64	12.95
MTSS1	RORC	705	539	874	566	518	0.584	10.93	8.06	10.59	2.25	12.57	12.67	11.22	8.15	11.45	12.95
DCP2	RPL37A	32	302	884	481	602	0.717	11.73	13.44	10.12	13.99	9.82	13.86	10.82	14.49	10.16	14.85
EPAS1	RPRD1B	533	339	977	578	843	0.727	9.57	10.01	12.89	9.50	13.73	12.23	17.49	10.25	12.61	11.58
IL4R	RPRD1B	861	258	994	588	421	0.763	14.13	10.01	8.99	9.50	13.12	12.23	13.61	10.25	9.39	11.58
MPZL1	RRP36	643	781	990	974	735	0.413	11.41	10.48	10.19	9.24	10.54	10.00	11.97	9.53	10.09	10.31
ACOX1	RSAD1	73	646	901	939	949	0.328	12.20	10.22	10.77	11.11	13.29	11.45	10.86	10.53	11.83	11.84
BCKDHB	RTN4	201	216	992	454	803	0.833	7.73	12.65	9.20	14.96	11.25	13.13	8.39	14.08	8.89	13.72
BDH2	RTN4	456	111	1000	606	526	0.934	7.37	12.65	9.22	14.96	10.42	13.13	9.42	14.08	8.99	13.72
CHPT1	RTN4	742	231	906	818	29	0.532	11.93	12.65	10.85	14.96	11.91	13.13	10.99	14.08	10.38	13.72
PECR	RTN4	986	644	999	333	957	0.455	9.87	12.65	6.19	14.96	11.62	13.13	7.03	14.08	7.21	13.72
CMBL	RTTN	364	138	870	905	578	0.516	7.17	8.56	9.51	7.96	12.25	8.81	8.09	8.24	12.16	9.30
GPER1	RTTN	6	21	752	660	634	0.357	8.66	8.56	9.21	7.96	10.27	8.81	8.09	8.24	7.12	9.30
ING1	RTTN	699	524	813	655	133	0.437	10.59	8.56	8.50	7.96	9.47	8.81	8.94	8.24	8.97	9.30
ITPR2	RTTN	528	79	732	853	566	0.301	10.24	8.56	9.82	7.96	11.55	8.81	9.84	8.24	8.97	9.30
NHSL1	RTTN	443	82	890	738	751	0.535	6.58	8.56	8.82	7.96	11.21	8.81	9.67	8.24	6.75	9.30
RING1	RTTN	917	822	886	873	491	0.232	10.60	8.56	11.23	7.96	11.11	8.81	10.90	8.24	10.55	9.30
RORC	RTTN	840	576	819	742	186	0.320	8.06	8.56	2.25	7.96	12.67	8.81	8.15	8.24	12.95	9.30
CDC42SE1	RUNX3	23	485	699	768	450	0.298	14.50	12.38	11.10	4.53	11.08	7.66	12.81	9.50	10.91	5.70
CELF2	RUNX3	20	42	934	631	234	0.802	13.59	12.38	12.90	4.53	8.49	7.66	12.77	9.50	11.43	5.70
CMTM7	RUNX3	164	720	755	231	548	0.376	11.80	12.38	4.61	4.53	7.65	7.66	10.12	9.50	7.08	5.70
PDE7A	RUNX3	617	67	966	686	35	0.780	11.40	12.38	9.13	4.53	8.66	7.66	10.77	9.50	12.02	5.70
ADCK3	RXRA	767	237	865	959	768	0.280	11.12	13.70	10.84	11.98	12.86	14.06	10.46	12.01	15.54	13.83
AMT	RXRA	187	286	27	538	8	0.000	9.69	13.70	9.84	11.98	11.69	14.06	10.01	12.01	9.67	13.83
C11orf71	RXRA	101	108	96	50	47	0.000	0.00	13.70	0.00	11.98	0.00	14.06	0.00	12.01	0.00	13.83
CAPN5	RXRA	15	480	43	347	10	0.000	9.12	13.70	10.52	11.98	12.54	14.06	8.83	12.01	7.59	13.83
DHRS4-AS1	RXRA	327	692	100	964	398	0.000	8.44	13.70	8.64	11.98	10.59	14.06	7.95	12.01	8.48	13.83
HSD17B8	RXRA	78	384	100	928	6	0.000	8.30	13.70	6.81	11.98	10.24	14.06	7.53	12.01	8.88	13.83
MBTPS1	RXRA	426	454	983	1000	838	0.555	11.20	13.70	11.73	11.98	11.75	14.06	12.16	12.01	11.19	13.83
MTG1	RXRA	268	353	843	963	694	0.417	9.88	13.70	9.12	11.98	11.52	14.06	9.34	12.01	9.61	13.83
PDXP	RXRA	202	375	781	747	446	0.439	5.06	13.70	7.72	11.98	6.30	14.06	2.59	12.01	5.11	13.83
POLD2	RXRA	124	717	736	937	711	0.140	10.09	13.70	10.84	11.98	12.14	14.06	10.61	12.01	11.92	13.83
PDP1	S100A11	229	34	992	637	277	0.915	8.66	16.03	11.76	7.40	7.82	9.71	9.24	13.47	9.83	9.69
AMPD3	S100A4	523	127	930	282	9	0.849	11.34	14.62	9.32	4.97	7.03	8.19	9.17	13.25	12.10	10.11
ARHGEF18	S100A4	736	143	901	745	393	0.561	12.04	14.62	11.03	4.97	10.60	8.19	11.09	13.25	9.41	10.11
ARL4C	S100A4	13	18	811	616	805	0.411	12.00	14.62	10.94	4.97	8.86	8.19	10.55	13.25	7.25	10.11
CRLF3	S100A4	666	198	937	764	544	0.637	11.08	14.62	7.83	4.97	8.17	8.19	9.01	13.25	8.02	10.11
DCTN5	S100A4	693	103	945	717	264	0.685	10.98	14.62	10.36	4.97	10.23	8.19	10.54	13.25	10.67	10.11
DNAJA4	S100A4	4	32	689	168	345	0.378	10.69	14.62	12.11	4.97	7.50	8.19	10.03	13.25	11.99	10.11
FOCAD	S100A4	418	21	874	654	382	0.671	9.42	14.62	11.05	4.97	8.65	8.19	9.84	13.25	10.23	10.11
PDE7A	S100A4	187	39	635	451	52	0.270	11.40	14.62	9.13	4.97	8.66	8.19	10.77	13.25	12.02	10.11
PFKM	S100A4	183	54	967	712	315	0.828	9.45	14.62	13.10	4.97	8.86	8.19	10.81	13.25	15.56	10.11
RUNX3	S100A4	9	650	729	569	754	0.234	12.38	14.62	4.53	4.97	7.66	8.19	9.50	13.25	5.70	10.11
ARL4C	S100A6	2	344	947	564	856	0.684	12.00	14.61	10.94	11.25	8.86	9.51	10.55	15.24	7.25	11.92
CYTH3	S100A6	213	499	985	751	703	0.743	9.37	14.61	11.55	11.25	8.76	9.51	11.32	15.24	10.66	11.92
NFATC1	S100A6	51	639	954	806	272	0.685	10.62	14.61	7.00	11.25	7.64	9.51	9.93	15.24	11.46	11.92
PAM	S100A6	749	429	991	907	316	0.654	10.75	14.61	11.67	11.25	9.43	9.51	12.84	15.24	12.91	11.92
KLHDC3	SAP30L	940	925	987	981	163	0.301	11.43	10.62	13.83	10.88	11.79	10.30	11.23	10.48	12.47	10.99
CHPT1	SAR1B	733	827	996	858	843	0.361	11.93	10.31	10.85	10.72	11.91	13.14	10.99	10.80	10.38	13.29
MRPL34	SAR1B	835	659	935	895	821	0.265	9.75	10.31	10.01	10.72	11.60	13.14	9.30	10.80	11.13	13.29
MRPL41	SAR1B	279	307	629	558	588	0.185	10.26	10.31	12.41	10.72	12.06	13.14	10.06	10.80	12.01	13.29
CMBL	SC5D	314	847	866	743	460	0.437	7.17	8.79	9.51	10.51	12.25	12.82	8.09	9.70	12.16	8.60
PECR	SC5D	207	794	833	903	818	0.194	9.87	8.79	6.19	10.51	11.62	12.82	7.03	9.70	7.21	8.60
PHGDH	SC5D	406	155	750	863	453	0.375	8.21	8.79	12.10	10.51	12.30	12.82	9.45	9.70	6.97	8.60
PXMP2	SC5D	676	641	876	879	627	0.342	8.08	8.79	8.38	10.51	12.52	12.82	7.60	9.70	9.78	8.60
CACFD1	SCAP	938	776	896	994	782	0.117	8.73	11.95	9.08	11.97	11.92	12.75	9.64	11.52	9.21	11.39
AGPAT2	SCARB1	531	728	897	305	637	0.596	11.77	9.33	8.54	11.30	13.80	14.14	11.21	9.99	10.14	9.60
HIATL1	SDAD1	877	749	994	960	885	0.253	11.37	9.49	9.93	9.54	9.54	9.68	11.19	9.50	9.78	10.63
CREM	SDC4	387	496	969	159	766	0.805	10.25	8.87	9.58	11.34	9.87	13.80	9.67	13.31	9.89	12.33
EIF5	SDC4	363	55	944	660	562	0.777	12.06	8.87	13.31	11.34	13.94	13.80	12.84	13.31	13.46	12.33
HMCES	SDC4	299	111	808	852	677	0.373	10.72	8.87	11.10	11.34	10.93	13.80	10.31	13.31	11.26	12.33
LYSMD2	SDC4	134	26	850	136	98	0.700	9.64	8.87	10.03	11.34	8.80	13.80	8.20	13.31	8.43	12.33
NAMPT	SDC4	410	506	984	538	601	0.895	16.57	8.87	10.21	11.34	14.12	13.80	14.13	13.31	12.32	12.33
PECR	SDHB	981	795	543	948	973	0.000	9.87	11.45	6.19	11.00	11.62	12.68	7.03	10.67	7.21	12.80
ARHGAP30	SEC14L1	660	488	867	292	556	0.626	14.26	13.87	5.78	12.45	8.61	10.54	11.40	13.44	7.30	12.36
NAAA	SEC62	399	838	906	843	844	0.299	11.23	11.97	8.10	12.67	10.67	12.74	9.41	12.38	8.49	11.53
RNF130	SEC62	818	718	979	954	965	0.231	13.16	11.97	12.26	12.67	12.60	12.74	11.80	12.38	11.12	11.53
ABCC1	SEL1L3	670	670	976	878	47	0.593	10.87	11.51	8.72	9.52	8.42	8.90	11.69	11.23	11.54	7.46
AEBP1	SEL1L3	314	176	889	139	870	0.593	9.24	11.51	11.07	9.52	11.28	8.90	14.79	11.23	10.88	7.46
AMICA1	SEL1L3	630	356	917	574	806	0.579	13.99	11.51	3.15	9.52	8.01	8.90	10.35	11.23	5.76	7.46
ANXA11	SEL1L3	717	482	983	924	786	0.502	14.17	11.51	12.34	9.52	11.72	8.90	13.42	11.23	13.41	7.46
ARHGEF6	SEL1L3	914	88	872	222	672	0.472	11.94	11.51	10.49	9.52	8.77	8.90	11.28	11.23	11.80	7.46
ARPC2	SEL1L3	867	470	998	927	605	0.546	14.63	11.51	12.36	9.52	11.91	8.90	13.74	11.23	13.04	7.46
ARRDC2	SEL1L3	340	7	827	169	25	0.654	12.03	11.51	10.43	9.52	10.05	8.90	12.48	11.23	13.11	7.46
BCL2	SEL1L3	591	188	853	402	505	0.658	10.02	11.51	9.58	9.52	7.28	8.90	8.96	11.23	10.41	7.46
CLIP4	SEL1L3	667	343	853	699	62	0.523	9.90	11.51	10.67	9.52	8.37	8.90	11.16	11.23	12.72	7.46
DYNLT1	SEL1L3	856	293	987	948	392	0.572	11.88	11.51	9.02	9.52	10.40	8.90	11.18	11.23	10.98	7.46
EFEMP2	SEL1L3	693	272	879	390	786	0.518	9.81	11.51	10.23	9.52	9.16	8.90	11.74	11.23	9.95	7.46
ENDOD1	SEL1L3	475	231	994	763	662	0.775	9.80	11.51	11.39	9.52	8.75	8.90	10.75	11.23	11.57	7.46
FAR1	SEL1L3	862	335	960	801	804	0.436	11.68	11.51	11.30	9.52	8.50	8.90	11.70	11.23	10.98	7.46
FBLIM1	SEL1L3	120	155	852	372	881	0.528	5.78	11.51	5.86	9.52	8.75	8.90	11.52	11.23	8.50	7.46
FEZ2	SEL1L3	896	385	946	851	75	0.518	9.88	11.51	11.02	9.52	9.58	8.90	10.22	11.23	12.29	7.46
GAS7	SEL1L3	674	331	981	725	872	0.577	13.36	11.51	14.35	9.52	7.49	8.90	11.95	11.23	9.20	7.46
GLIPR2	SEL1L3	758	68	954	780	928	0.425	13.44	11.51	8.00	9.52	7.51	8.90	11.39	11.23	8.06	7.46
GPR56	SEL1L3	98	226	847	480	952	0.520	11.55	11.51	13.08	9.52	8.34	8.90	11.86	11.23	10.02	7.46
HEG1	SEL1L3	247	235	992	599	859	0.755	9.15	11.51	10.18	9.52	9.12	8.90	13.23	11.23	10.30	7.46
KIF5B	SEL1L3	891	26	941	702	404	0.586	11.40	11.51	13.43	9.52	11.47	8.90	12.93	11.23	13.09	7.46
MBD2	SEL1L3	917	517	978	821	669	0.494	12.15	11.51	9.56	9.52	10.62	8.90	11.56	11.23	10.87	7.46
MRAS	SEL1L3	408	369	922	817	363	0.685	8.10	11.51	13.25	9.52	8.23	8.90	10.50	11.23	12.10	7.46
MYLIP	SEL1L3	713	270	738	417	868	0.251	11.54	11.51	8.79	9.52	8.11	8.90	10.92	11.23	10.24	7.46
PLP2	SEL1L3	756	281	980	883	592	0.595	13.24	11.51	5.88	9.52	8.30	8.90	11.00	11.23	10.35	7.46
PLXDC2	SEL1L3	580	48	861	297	749	0.557	11.80	11.51	9.34	9.52	8.47	8.90	12.68	11.23	10.08	7.46
PREX1	SEL1L3	716	38	985	569	449	0.828	14.71	11.51	12.88	9.52	9.37	8.90	13.12	11.23	10.23	7.46
PRSS23	SEL1L3	145	128	865	466	718	0.621	8.99	11.51	7.83	9.52	9.07	8.90	12.44	11.23	9.79	7.46
RGS19	SEL1L3	782	467	988	812	659	0.600	13.08	11.51	7.21	9.52	7.60	8.90	9.47	11.23	6.86	7.46
RHOQ	SEL1L3	866	404	901	494	461	0.619	10.93	11.51	10.93	9.52	9.91	8.90	11.66	11.23	12.70	7.46
S100A4	SEL1L3	648	106	967	557	629	0.767	14.62	11.51	4.97	9.52	8.19	8.90	13.25	11.23	10.11	7.46
S100A6	SEL1L3	677	334	958	768	621	0.633	14.61	11.51	11.25	9.52	9.51	8.90	15.24	11.23	11.92	7.46
ACOT13	SELENBP1	4	557	803	922	438	0.426	9.36	12.06	9.23	10.87	10.76	13.93	8.25	12.74	10.11	11.59
ASB13	SELENBP1	8	59	988	916	351	0.768	8.71	12.06	10.08	10.87	11.70	13.93	8.70	12.74	9.80	11.59
COQ10A	SELENBP1	95	312	793	967	702	0.339	8.44	12.06	8.75	10.87	9.96	13.93	7.45	12.74	11.56	11.59
GAMT	SELENBP1	181	321	805	493	682	0.519	8.45	12.06	10.48	10.87	13.88	13.93	6.91	12.74	13.72	11.59
GRB10	SELENBP1	5	10	371	461	273	0.000	11.26	12.06	11.67	10.87	11.85	13.93	11.40	12.74	12.16	11.59
LIME1	SELENBP1	66	212	912	331	437	0.824	11.54	12.06	10.12	10.87	12.67	13.93	8.81	12.74	8.56	11.59
MRPL41	SELENBP1	78	618	815	703	747	0.346	10.26	12.06	12.41	10.87	12.06	13.93	10.06	12.74	12.01	11.59
NAPRT1	SELENBP1	14	288	903	704	356	0.704	11.51	12.06	8.44	10.87	12.12	13.93	9.96	12.74	9.48	11.59
NDUFB7	SELENBP1	24	454	545	841	815	0.045	10.61	12.06	11.13	10.87	11.54	13.93	10.16	12.74	12.11	11.59
NDUFB8	SELENBP1	46	426	554	731	750	0.054	10.94	12.06	12.50	10.87	11.61	13.93	10.55	12.74	11.65	11.59
NIPSNAP1	SELENBP1	14	48	901	922	360	0.602	10.29	12.06	11.18	10.87	13.03	13.93	9.00	12.74	7.56	11.59
NIT2	SELENBP1	131	212	982	812	298	0.808	9.27	12.06	9.20	10.87	12.33	13.93	9.58	12.74	10.78	11.59
NQO2	SELENBP1	4	85	647	547	168	0.271	12.10	12.06	9.74	10.87	11.42	13.93	9.37	12.74	11.16	11.59
PHKG2	SELENBP1	14	90	93	772	371	0.000	11.13	12.06	10.17	10.87	10.79	13.93	9.90	12.74	9.37	11.59
PIK3R1	SELENBP1	80	100	969	754	66	0.811	11.56	12.06	12.83	10.87	12.80	13.93	12.54	12.74	12.78	11.59
ALAD	SELO	497	727	780	865	778	0.168	10.83	11.36	12.12	10.21	13.07	12.67	10.56	10.11	10.62	10.39
ALDH6A1	SELO	584	40	557	422	70	0.086	8.42	11.36	12.86	10.21	13.70	12.67	9.40	10.11	10.84	10.39
MARC1	SELO	542	467	683	472	232	0.345	11.50	11.36	8.34	10.21	11.33	12.67	8.39	10.11	8.33	10.39
MSRB1	SELO	703	551	829	699	593	0.385	14.23	11.36	8.56	10.21	12.94	12.67	9.84	10.11	10.98	10.39
MUT	SELO	743	558	669	559	599	0.145	9.45	11.36	10.33	10.21	12.70	12.67	9.87	10.11	10.91	10.39
PCBD1	SELO	571	612	825	751	678	0.344	9.09	11.36	10.21	10.21	13.15	12.67	10.08	10.11	10.65	10.39
SEL1L3	SELPLG	738	40	995	853	783	0.553	11.51	15.22	9.52	6.72	8.90	7.52	11.23	10.82	7.46	6.63
AEBP1	SEMA4D	161	28	894	474	403	0.788	9.24	13.38	11.07	12.04	11.28	8.84	14.79	10.86	10.88	12.62
FXYD5	SEMA4D	278	63	884	738	549	0.625	13.57	13.38	7.37	12.04	8.87	8.84	11.78	10.86	9.03	12.62
LBH	SEMA4D	310	39	834	461	287	0.668	10.01	13.38	6.27	12.04	7.61	8.84	11.41	10.86	8.17	12.62
SEL1L3	SEPN1	813	489	991	871	328	0.640	11.51	10.64	9.52	11.80	8.90	10.43	11.23	12.46	7.46	11.88
ACYP2	SEPSECS	844	596	885	717	481	0.442	8.11	8.60	10.27	7.33	8.97	11.39	7.23	9.04	11.38	9.09
ADK	SEPSECS	825	640	928	563	815	0.434	9.38	8.60	8.69	7.33	11.59	11.39	9.31	9.04	9.63	9.09
ATP5G3	SEPSECS	801	490	725	500	109	0.338	11.42	8.60	12.34	7.33	13.03	11.39	11.62	9.04	13.28	9.09
BNIP3	SEPSECS	720	565	915	674	727	0.487	9.50	8.60	11.44	7.33	12.07	11.39	9.81	9.04	12.63	9.09
C6orf106	SEPSECS	688	322	818	403	463	0.542	12.16	8.60	13.04	7.33	13.10	11.39	12.59	9.04	14.15	9.09
DENND5B	SEPSECS	752	591	956	687	791	0.501	7.39	8.60	10.50	7.33	10.37	11.39	7.97	9.04	10.54	9.09
ECI2	SEPSECS	769	594	921	754	431	0.533	9.22	8.60	9.65	7.33	12.22	11.39	9.26	9.04	11.86	9.09
ETFA	SEPSECS	904	708	822	576	522	0.330	11.06	8.60	10.63	7.33	13.33	11.39	10.83	9.04	13.02	9.09
FH	SEPSECS	788	713	824	502	580	0.356	10.19	8.60	10.92	7.33	12.98	11.39	10.25	9.04	12.65	9.09
IL13RA1	SEPSECS	473	464	857	700	539	0.595	12.26	8.60	8.64	7.33	12.92	11.39	12.22	9.04	11.50	9.09
NDUFB1	SEPSECS	569	211	835	481	285	0.635	9.40	8.60	10.58	7.33	10.91	11.39	9.47	9.04	11.47	9.09
NDUFB6	SEPSECS	493	582	781	498	575	0.483	10.16	8.60	10.06	7.33	10.38	11.39	9.17	9.04	10.93	9.09
PECR	SEPSECS	535	712	815	528	268	0.492	9.87	8.60	6.19	7.33	11.62	11.39	7.03	9.04	7.21	9.09
SDHB	SEPSECS	657	552	777	473	354	0.450	11.45	8.60	11.00	7.33	12.68	11.39	10.67	9.04	12.80	9.09
RCN2	SEPT8	835	714	955	723	741	0.404	8.68	8.42	10.87	13.58	9.32	10.38	10.30	11.42	10.63	9.54
AEN	SERPINB1	37	777	968	856	860	0.440	10.10	14.27	8.06	8.36	9.67	10.48	9.39	12.78	9.89	10.88
BTBD1	SERPINB1	430	253	986	764	218	0.840	10.44	14.27	11.99	8.36	10.71	10.48	10.91	12.78	13.94	10.88
CCT2	SERPINB1	302	385	998	845	891	0.628	10.71	14.27	11.58	8.36	11.20	10.48	11.54	12.78	12.17	10.88
DNM1L	SERPINB1	362	162	986	746	351	0.849	10.21	14.27	12.33	8.36	10.10	10.48	11.16	12.78	11.68	10.88
IER5L	SERPINB1	95	409	974	76	279	0.948	8.87	14.27	7.61	8.36	8.10	10.48	7.89	12.78	6.97	10.88
LTV1	SERPINB1	592	450	986	697	792	0.681	9.15	14.27	8.70	8.36	9.93	10.48	9.76	12.78	10.58	10.88
MSANTD3	SERPINB1	64	173	998	777	495	0.858	7.81	14.27	8.29	8.36	8.42	10.48	8.56	12.78	9.44	10.88
ODC1	SERPINB1	9	720	949	676	681	0.610	11.13	14.27	10.44	8.36	11.73	10.48	11.23	12.78	12.88	10.88
RQCD1	SERPINB1	234	534	949	840	336	0.711	10.70	14.27	10.13	8.36	10.67	10.48	10.64	12.78	10.21	10.88
RRS1	SERPINB1	154	417	975	687	488	0.857	8.65	14.27	7.76	8.36	8.40	10.48	7.82	12.78	10.45	10.88
DNAJC5	SERPINB6	815	34	924	766	925	0.345	13.04	11.66	13.80	11.12	11.25	11.08	12.02	12.86	11.17	12.64
PLXNA1	SERPINB6	519	13	956	746	608	0.726	8.93	11.66	12.92	11.12	9.35	11.08	12.18	12.86	11.18	12.64
NAP1L1	SERPINE2	778	456	751	240	16	0.377	12.60	7.32	13.54	12.58	12.08	8.07	14.64	8.87	14.04	7.91
PALD1	SERPINE2	597	334	475	55	482	0.000	6.45	7.32	9.69	12.58	7.31	8.07	11.25	8.87	9.02	7.91
PAM	SERPINE2	470	707	934	510	409	0.759	10.75	7.32	11.67	12.58	9.43	8.07	12.84	8.87	12.91	7.91
ADHFE1	SERPINF1	753	68	288	331	156	0.000	8.66	8.85	9.62	10.49	12.15	14.62	9.00	12.75	11.31	13.65
HADH	SERPINF1	854	564	813	618	142	0.379	9.31	8.85	9.88	10.49	12.92	14.62	10.15	12.75	12.83	13.65
PGM1	SERPINF1	340	395	991	408	549	0.958	11.42	8.85	11.18	10.49	13.46	14.62	11.02	12.75	15.09	13.65
PHYH	SERPINF1	863	777	723	563	574	0.154	8.66	8.85	10.04	10.49	13.11	14.62	9.24	12.75	13.25	13.65
CAMK2D	SERTAD2	882	815	946	970	818	0.162	9.69	10.90	11.23	8.59	10.78	10.37	11.40	10.43	12.75	9.99
FAM89A	SETX	563	388	964	788	482	0.752	8.31	12.16	6.69	11.07	7.82	11.66	8.85	12.19	7.09	11.52
BASP1	SFT2D1	900	315	632	596	726	0.084	14.45	11.20	14.01	9.84	8.06	9.49	10.34	10.26	6.68	9.35
C1orf54	SFT2D1	402	637	701	617	789	0.174	6.17	11.20	6.78	9.84	6.32	9.49	7.28	10.26	7.21	9.35
GNG11	SFT2D1	711	693	665	651	928	0.007	9.61	11.20	8.71	9.84	9.02	9.49	11.59	10.26	9.78	9.35
ICAM2	SFT2D1	90	598	509	791	815	0.004	10.62	11.20	6.48	9.84	6.26	9.49	9.55	10.26	8.59	9.35
PLEK	SFT2D1	676	666	746	609	773	0.143	14.24	11.20	5.92	9.84	8.47	9.49	10.85	10.26	7.03	9.35
ACAD8	SFXN1	924	984	955	852	940	0.074	10.39	10.52	10.44	10.97	11.15	12.38	10.21	9.19	10.97	9.56
ACADS	SFXN1	387	104	927	649	657	0.701	10.09	10.52	9.05	10.97	13.50	12.38	9.30	9.19	12.57	9.56
ACOX1	SFXN1	547	649	986	856	749	0.572	12.20	10.52	10.77	10.97	13.29	12.38	10.86	9.19	11.83	9.56
ACSL5	SFXN1	666	81	923	732	851	0.471	10.94	10.52	8.33	10.97	12.76	12.38	11.40	9.19	8.25	9.56
ADH4	SFXN1	101	108	730	268	190	0.460	4.44	10.52	0.89	10.97	14.79	12.38	2.51	9.19	5.00	9.56
CBR4	SFXN1	833	958	985	771	950	0.214	9.23	10.52	9.36	10.97	11.24	12.38	8.78	9.19	10.01	9.56
CLCN5	SFXN1	656	966	924	816	735	0.282	8.63	10.52	7.53	10.97	11.16	12.38	9.39	9.19	9.81	9.56
GPER1	SFXN1	295	98	822	133	670	0.559	8.66	10.52	9.21	10.97	10.27	12.38	8.09	9.19	7.12	9.56
KIAA2018	SFXN1	786	976	996	710	720	0.396	10.01	10.52	9.27	10.97	10.57	12.38	9.58	9.19	11.26	9.56
MGST2	SFXN1	567	597	963	732	808	0.574	9.68	10.52	7.45	10.97	11.74	12.38	9.31	9.19	9.67	9.56
NT5DC1	SFXN1	705	798	933	699	826	0.352	9.46	10.52	9.50	10.97	10.91	12.38	9.48	9.19	10.09	9.56
PRKAG2	SFXN1	724	998	823	733	581	0.215	9.86	10.52	10.44	10.97	11.13	12.38	9.85	9.19	9.61	9.56
PDE7A	SFXN3	921	920	802	858	187	0.151	11.40	11.18	9.13	11.93	8.66	8.91	10.77	12.05	12.02	9.15
ABHD14B	SFXN5	54	453	986	859	830	0.627	11.14	11.06	8.89	13.53	12.70	12.51	10.67	8.90	9.88	9.71
C16orf58	SFXN5	100	175	833	972	807	0.346	10.36	11.06	11.02	13.53	11.83	12.51	10.83	8.90	9.43	9.71
CARHSP1	SFXN5	668	628	899	203	684	0.558	10.68	11.06	9.59	13.53	11.58	12.51	11.15	8.90	8.62	9.71
ECH1	SFXN5	314	699	820	927	675	0.293	11.95	11.06	11.47	13.53	13.88	12.51	11.96	8.90	13.95	9.71
FAXDC2	SFXN5	69	340	906	339	692	0.716	11.01	11.06	10.92	13.53	12.04	12.51	11.36	8.90	9.41	9.71
GLRX5	SFXN5	19	639	826	962	812	0.264	11.37	11.06	10.61	13.53	11.38	12.51	9.48	8.90	11.56	9.71
HMGCL	SFXN5	912	742	956	970	758	0.228	10.43	11.06	9.21	13.53	13.52	12.51	9.80	8.90	10.64	9.71
IL11RA	SFXN5	62	282	997	439	860	0.814	10.19	11.06	9.85	13.53	11.03	12.51	9.90	8.90	9.78	9.71
ILVBL	SFXN5	168	451	706	990	834	0.206	9.84	11.06	10.35	13.53	11.74	12.51	10.22	8.90	9.95	9.71
LSS	SFXN5	179	167	822	913	860	0.322	10.31	11.06	12.03	13.53	12.77	12.51	12.21	8.90	11.56	9.71
MMAB	SFXN5	226	376	873	955	885	0.373	8.67	11.06	9.74	13.53	12.02	12.51	9.35	8.90	10.04	9.71
MTFR1L	SFXN5	778	355	995	971	859	0.436	10.55	11.06	11.68	13.53	11.89	12.51	10.51	8.90	12.28	9.71
NIPSNAP1	SFXN5	620	252	869	948	665	0.411	10.29	11.06	11.18	13.53	13.03	12.51	9.00	8.90	7.56	9.71
RSAD1	SFXN5	140	220	964	951	768	0.569	10.22	11.06	11.11	13.53	11.45	12.51	10.53	8.90	11.84	9.71
SC5D	SFXN5	86	504	778	744	753	0.305	8.79	11.06	10.51	13.53	12.82	12.51	9.70	8.90	8.60	9.71
ATOX1	SH3BGRL2	527	676	849	486	759	0.467	10.15	9.34	9.86	11.15	11.07	11.68	9.45	10.07	8.97	9.17
CROT	SH3BGRL2	435	923	989	871	576	0.543	7.98	9.34	8.24	11.15	9.97	11.68	8.17	10.07	9.40	9.17
CYP27A1	SH3BGRL2	410	42	909	467	436	0.818	10.83	9.34	10.07	11.15	14.61	11.68	12.12	10.07	10.70	9.17
MPLKIP	SH3BGRL2	679	927	878	863	882	0.107	9.75	9.34	8.57	11.15	10.47	11.68	8.54	10.07	9.04	9.17
LEPROTL1	SH3BGRL3	557	680	999	781	831	0.574	11.33	15.08	10.27	11.09	10.06	10.56	10.34	12.54	9.47	9.58
RTTN	SH3PXD2A	978	921	885	475	471	0.385	8.56	9.13	7.96	12.51	8.81	12.27	8.24	12.64	9.30	12.15
IGFBP7	SH3YL1	433	140	959	378	749	0.793	10.42	9.02	11.28	10.35	12.67	9.05	14.10	10.24	11.84	9.31
FARSB	SHC1	866	487	977	836	983	0.364	9.69	11.41	10.92	10.26	10.10	11.97	9.67	12.65	11.28	11.28
IARS	SHC1	722	515	992	834	952	0.472	10.56	11.41	11.80	10.26	11.80	11.97	12.11	12.65	12.66	11.28
NCL	SHC1	833	619	994	871	999	0.330	12.52	11.41	13.38	10.26	13.48	11.97	14.03	12.65	14.26	11.28
NHP2L1	SHC1	845	464	988	857	871	0.440	11.35	11.41	12.53	10.26	11.14	11.97	11.46	12.65	12.30	11.28
ADK	SHMT1	605	372	979	951	737	0.561	9.38	9.51	8.69	7.83	11.59	14.46	9.31	9.06	9.63	9.91
PCYOX1	SHMT1	794	338	927	830	879	0.352	9.21	9.51	11.07	7.83	12.34	14.46	11.71	9.06	11.60	9.91
SCP2	SHMT1	763	579	945	899	899	0.320	10.99	9.51	11.03	7.83	14.73	14.46	11.60	9.06	11.87	9.91
GJB1	SHMT2	101	125	407	426	47	0.000	3.11	11.03	7.86	9.78	13.76	13.75	2.71	10.90	1.73	11.06
PREB	SHROOM1	684	596	978	788	333	0.672	11.38	7.96	10.61	9.87	12.56	13.20	10.99	9.74	12.38	7.43
ASPDH	SIGIRR	701	337	973	231	47	0.846	4.80	11.89	9.48	8.92	11.11	11.95	2.28	10.61	1.91	8.27
CAMK2B	SIGIRR	233	23	887	53	450	0.774	5.38	11.89	14.04	8.92	9.15	11.95	3.76	10.61	12.91	8.27
CMBL	SIGIRR	335	560	885	810	167	0.585	7.17	11.89	9.51	8.92	12.25	11.95	8.09	10.61	12.16	8.27
MSRA	SIGIRR	186	71	579	667	837	0.079	10.75	11.89	9.28	8.92	10.89	11.95	8.24	10.61	8.85	8.27
NR3C2	SIGIRR	838	187	868	789	304	0.422	7.55	11.89	9.89	8.92	9.11	11.95	8.91	10.61	9.68	8.27
HSDL2	SIGMAR1	200	263	992	932	161	0.768	11.41	10.36	10.71	10.29	12.79	13.06	10.38	10.19	12.91	9.51
BACE1	SIRT3	771	838	874	935	363	0.257	8.44	9.93	11.77	11.06	11.13	10.85	10.66	9.33	10.53	10.38
CMBL	SIRT3	93	787	928	916	711	0.399	7.17	9.93	9.51	11.06	12.25	10.85	8.09	9.33	12.16	10.38
COL18A1	SIRT3	747	418	928	380	590	0.688	11.97	9.93	10.21	11.06	15.08	10.85	13.12	9.33	10.94	10.38
GPER1	SIRT3	564	271	898	771	658	0.549	8.66	9.93	9.21	11.06	10.27	10.85	8.09	9.33	7.12	10.38
LIME1	SIRT3	755	752	956	669	379	0.574	11.54	9.93	10.12	11.06	12.67	10.85	8.81	9.33	8.56	10.38
METTL7A	SIRT3	773	209	958	953	401	0.553	10.96	9.93	11.88	11.06	14.09	10.85	12.50	9.33	11.44	10.38
PAOX	SIRT3	799	779	981	980	466	0.433	8.04	9.93	6.95	11.06	9.33	10.85	6.35	9.33	7.84	10.38
RXRA	SIRT3	759	680	347	994	28	0.000	13.70	9.93	11.98	11.06	14.06	10.85	12.01	9.33	13.83	10.38
CHDH	SIRT5	87	89	872	622	725	0.571	6.05	10.05	10.17	9.90	12.42	10.80	7.98	8.62	9.09	10.53
EIF4EBP2	SIRT5	712	504	537	848	171	0.035	12.86	10.05	11.96	9.90	12.87	10.80	12.98	8.62	13.24	10.53
FAM13A	SIRT5	631	946	928	960	287	0.362	9.97	10.05	10.53	9.90	11.26	10.80	10.10	8.62	9.99	10.53
FBXO7	SIRT5	10	548	916	832	643	0.571	14.15	10.05	11.33	9.90	11.96	10.80	12.13	8.62	10.77	10.53
KIAA2018	SIRT5	615	949	819	941	715	0.154	10.01	10.05	9.27	9.90	10.57	10.80	9.58	8.62	11.26	10.53
PDK4	SIRT5	704	66	858	760	13	0.484	9.95	10.05	10.49	9.90	12.47	10.80	13.47	8.62	15.87	10.53
PEX11G	SIRT5	783	297	973	909	655	0.522	7.53	10.05	5.47	9.90	9.02	10.80	5.78	8.62	6.03	10.53
RORC	SIRT5	21	191	937	710	313	0.769	8.06	10.05	2.25	9.90	12.67	10.80	8.15	8.62	12.95	10.53
MPC2	SKP2	893	654	758	839	711	0.075	9.96	8.68	10.96	7.86	12.34	9.57	9.22	7.83	11.48	7.79
NHSL1	SKP2	610	314	974	555	718	0.756	6.58	8.68	8.82	7.86	11.21	9.57	9.67	7.83	6.75	7.79
NR2F6	SKP2	703	429	876	711	712	0.439	7.69	8.68	10.18	7.86	12.52	9.57	9.91	7.83	10.43	7.79
ADA	SLA	6	514	928	391	453	0.849	10.05	14.20	6.77	6.45	7.50	8.46	8.07	11.38	8.35	7.19
ADO	SLA	470	297	789	634	637	0.443	9.12	14.20	10.15	6.45	8.75	8.46	8.81	11.38	9.94	7.19
ARID5B	SLA	196	738	785	207	878	0.308	10.64	14.20	10.33	6.45	9.28	8.46	11.63	11.38	13.34	7.19
ARL4C	SLA	6	148	806	281	681	0.521	12.00	14.20	10.94	6.45	8.86	8.46	10.55	11.38	7.25	7.19
BLVRA	SLA	377	372	969	707	376	0.835	10.54	14.20	9.62	6.45	6.99	8.46	10.47	11.38	10.30	7.19
PDE7A	SLA	571	361	431	171	366	0.000	11.40	14.20	9.13	6.45	8.66	8.46	10.77	11.38	12.02	7.19
BCCIP	SLC17A5	827	709	995	886	963	0.297	9.67	9.74	9.87	8.50	10.40	10.09	9.72	9.88	11.07	8.97
QDPR	SLC1A2	150	21	312	313	423	0.000	9.09	6.55	13.37	17.73	12.86	11.18	9.44	4.86	10.77	6.49
RAB4A	SLC1A2	203	558	420	274	420	0.000	9.38	6.55	10.21	17.73	10.38	11.18	9.04	4.86	10.59	6.49
BLVRA	SLC1A3	400	205	980	751	342	0.835	10.54	9.11	9.62	15.59	6.99	6.22	10.47	9.85	10.30	10.25
CCND3	SLC1A3	781	472	964	708	194	0.683	14.09	9.11	11.74	15.59	9.88	6.22	12.72	9.85	9.70	10.25
CELF2	SLC1A3	786	91	893	584	101	0.601	13.59	9.11	12.90	15.59	8.49	6.22	12.77	9.85	11.43	10.25
GLS	SLC1A3	199	21	835	234	633	0.604	11.04	9.11	12.80	15.59	9.64	6.22	12.55	9.85	10.56	10.25
LEPROTL1	SLC1A3	121	328	942	397	290	0.884	11.33	9.11	10.27	15.59	10.06	6.22	10.34	9.85	9.47	10.25
LPCAT1	SLC1A3	67	384	915	754	445	0.703	13.23	9.11	11.33	15.59	9.78	6.22	13.90	9.85	8.88	10.25
RAB15	SLC1A4	628	418	994	432	230	0.924	8.48	9.46	12.97	11.90	10.80	9.73	9.67	8.90	9.33	11.18
ATP9A	SLC22A5	700	276	412	779	167	0.000	10.04	8.20	13.69	8.76	10.40	9.57	10.48	8.37	11.40	11.94
IRGQ	SLC22A5	316	340	706	677	664	0.241	10.50	8.20	11.64	8.76	10.31	9.57	10.63	8.37	10.99	11.94
SBNO1	SLC22A5	963	459	851	953	842	0.180	10.88	8.20	11.06	8.76	10.73	9.57	10.52	8.37	11.34	11.94
COQ10A	SLC25A1	911	364	697	911	10	0.197	8.44	10.56	8.75	9.89	9.96	12.83	7.45	10.50	11.56	9.53
ACBD4	SLC25A11	721	911	828	740	792	0.116	9.57	11.33	9.65	11.81	12.12	11.63	8.77	10.34	8.55	12.65
C2	SLC25A11	252	476	604	867	120	0.156	8.88	11.33	6.16	11.81	14.70	11.63	11.67	10.34	7.04	12.65
CHDH	SLC25A11	152	47	758	829	626	0.324	6.05	11.33	10.17	11.81	12.42	11.63	7.98	10.34	9.09	12.65
MARC1	SLC25A15	136	759	180	873	317	0.000	11.50	6.65	8.34	5.23	11.33	10.94	8.39	5.26	8.33	7.54
ACBD4	SLC25A20	633	394	962	760	327	0.728	9.57	10.52	9.65	8.49	12.12	12.31	8.77	8.92	8.55	11.33
CROT	SLC25A20	843	586	993	979	687	0.439	7.98	10.52	8.24	8.49	9.97	12.31	8.17	8.92	9.40	11.33
GRAMD4	SLC25A28	868	527	927	293	967	0.443	10.35	11.57	11.07	11.00	12.81	11.15	10.39	11.14	10.88	11.34
FTL	SLC25A3	584	157	911	925	369	0.575	18.59	12.78	16.19	13.29	17.22	13.70	18.59	13.79	14.18	14.79
ARHGEF6	SLC25A36	740	341	986	666	666	0.686	11.94	9.79	10.49	11.23	8.77	8.12	11.28	11.92	11.80	11.87
FSTL1	SLC25A36	334	324	978	621	623	0.834	8.75	9.79	10.39	11.23	11.17	8.12	14.56	11.92	11.59	11.87
JAM3	SLC25A36	489	605	999	350	532	0.929	8.47	9.79	10.95	11.23	7.93	8.12	11.29	11.92	9.16	11.87
PTGDS	SLC25A36	514	103	795	278	596	0.535	10.48	9.79	15.98	11.23	9.68	8.12	13.35	11.92	10.22	11.87
SERPINE2	SLC25A36	714	503	921	84	472	0.734	7.32	9.79	12.58	11.23	8.07	8.12	8.87	11.92	7.91	11.87
PER2	SLC25A37	130	295	797	356	827	0.446	9.26	15.84	9.51	8.85	9.63	10.51	9.34	11.50	10.23	10.39
ABHD6	SLC25A42	283	963	803	877	652	0.227	8.61	9.81	9.93	10.39	11.20	12.60	8.06	8.87	8.20	11.55
BCKDK	SLC25A42	190	920	695	654	414	0.215	12.01	9.81	10.53	10.39	11.86	12.60	10.42	8.87	11.67	11.55
CEBPA	SLC25A42	50	210	829	586	274	0.615	6.26	9.81	1.59	10.39	6.52	12.60	2.61	8.87	4.42	11.55
CNNM3	SLC25A42	948	713	959	993	883	0.167	9.86	9.81	8.93	10.39	10.56	12.60	9.25	8.87	10.12	11.55
GOT2	SLC25A42	978	980	860	681	286	0.270	10.41	9.81	12.42	10.39	13.65	12.60	10.73	8.87	14.04	11.55
HDGF	SLC25A42	663	806	914	201	586	0.550	13.20	9.81	12.30	10.39	13.58	12.60	13.07	8.87	13.43	11.55
HSDL2	SLC25A42	20	54	878	834	565	0.556	11.41	9.81	10.71	10.39	12.79	12.60	10.38	8.87	12.91	11.55
KIAA2013	SLC25A42	76	943	943	902	816	0.305	12.20	9.81	10.26	10.39	11.97	12.60	10.76	8.87	11.49	11.55
MPLKIP	SLC25A42	366	870	958	817	746	0.450	9.75	9.81	8.57	10.39	10.47	12.60	8.54	8.87	9.04	11.55
MSRA	SLC25A42	72	956	775	622	637	0.283	10.75	9.81	9.28	10.39	10.89	12.60	8.24	8.87	8.85	11.55
MTSS1	SLC25A42	907	660	953	799	591	0.427	10.93	9.81	10.59	10.39	12.57	12.60	11.22	8.87	11.45	11.55
PEX11A	SLC25A42	544	449	874	915	419	0.539	6.54	9.81	8.25	10.39	10.02	12.60	7.09	8.87	9.42	11.55
PHGDH	SLC25A42	708	22	813	507	269	0.518	8.21	9.81	12.10	10.39	12.30	12.60	9.45	8.87	6.97	11.55
PPFIBP2	SLC25A42	853	243	843	886	749	0.218	9.57	9.81	8.98	10.39	11.39	12.60	9.43	8.87	10.26	11.55
SFXN1	SLC25A42	372	976	931	516	560	0.609	10.52	9.81	10.97	10.39	12.38	12.60	9.19	8.87	9.56	11.55
SH3BGRL2	SLC25A42	93	931	897	898	413	0.397	9.34	9.81	11.15	10.39	11.68	12.60	10.07	8.87	9.17	11.55
SIGMAR1	SLC25A42	920	944	932	639	602	0.318	10.36	9.81	10.29	10.39	13.06	12.60	10.19	8.87	9.51	11.55
SLC19A1	SLC25A42	38	456	891	755	417	0.654	12.23	9.81	10.04	10.39	10.65	12.60	10.29	8.87	7.96	11.55
CERS5	SLC25A6	742	604	987	895	955	0.376	11.04	13.75	11.20	14.09	9.11	12.69	10.30	14.24	9.10	12.20
CCNG2	SLC26A2	903	497	781	506	174	0.418	11.05	8.15	10.67	7.37	8.55	7.49	10.38	10.52	9.66	9.51
CAPN5	SLC2A4RG	894	133	999	803	812	0.493	9.12	10.77	10.52	9.60	12.54	12.68	8.83	10.67	7.59	11.55
CASC10	SLC2A4RG	101	526	1000	778	529	0.834	2.58	10.77	8.36	9.60	8.98	12.68	4.65	10.67	4.14	11.55
CNNM3	SLC2A4RG	927	525	880	873	474	0.371	9.86	10.77	8.93	9.60	10.56	12.68	9.25	10.67	10.12	11.55
DHRS4-AS1	SLC2A4RG	788	359	978	799	355	0.662	8.44	10.77	8.64	9.60	10.59	12.68	7.95	10.67	8.48	11.55
GLO1	SLC2A4RG	838	281	182	805	592	0.000	10.45	10.77	11.85	9.60	11.69	12.68	11.53	10.67	12.22	11.55
MARC1	SLC2A4RG	4	432	900	561	835	0.602	11.50	10.77	8.34	9.60	11.33	12.68	8.39	10.67	8.33	11.55
MICU1	SLC2A4RG	91	94	965	878	826	0.578	11.89	10.77	11.75	9.60	11.68	12.68	10.82	10.67	11.83	11.55
NHSL1	SLC2A4RG	318	802	965	600	437	0.729	6.58	10.77	8.82	9.60	11.21	12.68	9.67	10.67	6.75	11.55
BECN1	SLC30A7	981	665	973	359	657	0.548	11.06	10.36	9.93	8.30	9.52	10.73	10.02	10.79	11.41	9.00
EGLN1	SLC30A7	905	830	979	576	510	0.547	11.92	10.36	11.46	8.30	11.84	10.73	10.43	10.79	14.65	9.00
PGK1	SLC30A7	855	736	985	702	452	0.574	14.92	10.36	13.85	8.30	13.20	10.73	13.72	10.79	14.25	9.00
AGL	SLC31A1	653	832	635	827	92	0.068	9.09	10.94	9.71	9.00	11.84	12.59	9.35	10.40	13.50	8.83
ALS2	SLC31A1	781	556	912	857	819	0.318	9.10	10.94	11.07	9.00	11.10	12.59	10.17	10.40	11.04	8.83
ATPAF1	SLC31A1	660	954	986	907	645	0.389	9.86	10.94	12.33	9.00	11.43	12.59	9.78	10.40	12.53	8.83
C16orf80	SLC31A1	736	737	653	756	719	0.000	9.28	10.94	10.04	9.00	9.73	12.59	8.98	10.40	8.51	8.83
ECI2	SLC31A1	640	813	734	752	146	0.164	9.22	10.94	9.65	9.00	12.22	12.59	9.26	10.40	11.86	8.83
LYRM1	SLC31A1	493	898	963	816	813	0.412	10.59	10.94	9.56	9.00	11.07	12.59	9.10	10.40	10.23	8.83
LYRM5	SLC31A1	795	886	908	659	741	0.276	8.66	10.94	9.27	9.00	10.17	12.59	7.94	10.40	10.39	8.83
PTS	SLC31A1	658	811	707	828	820	0.025	7.24	10.94	9.02	9.00	10.36	12.59	7.59	10.40	9.73	8.83
ARHGAP35	SLC35B4	952	922	776	863	626	0.075	10.17	8.82	13.20	10.34	12.36	10.47	11.42	8.77	11.76	8.42
B4GALT5	SLC35C1	749	939	989	357	881	0.444	12.86	10.07	10.64	9.08	11.05	12.71	11.83	9.64	12.62	9.29
LIMK2	SLC35C1	767	78	999	33	543	0.843	13.94	10.07	10.25	9.08	10.80	12.71	12.07	9.64	10.38	9.29
NCOA7	SLC35C1	692	918	963	464	858	0.442	10.06	10.07	11.02	9.08	10.68	12.71	11.28	9.64	9.33	9.29
ODC1	SLC35C1	114	534	924	954	947	0.407	11.13	10.07	10.44	9.08	11.73	12.71	11.23	9.64	12.88	9.29
NDUFC1	SLC35D1	804	615	689	886	106	0.132	9.38	9.28	10.41	8.47	10.43	12.63	9.26	9.03	11.57	10.19
NDUFS1	SLC35D1	977	817	989	910	147	0.376	10.57	9.28	11.90	8.47	12.27	12.63	10.88	9.03	13.71	10.19
SDHB	SLC35D1	781	748	901	813	223	0.381	11.45	9.28	11.00	8.47	12.68	12.63	10.67	9.03	12.80	10.19
LMTK2	SLC35D2	569	21	996	777	571	0.783	10.82	9.83	11.95	7.16	10.44	10.97	10.60	9.31	11.14	7.70
HN1L	SLC35E1	790	211	999	957	932	0.408	9.83	10.61	8.62	10.54	11.82	10.53	10.75	10.54	10.47	11.25
LIMK2	SLC37A1	254	134	903	378	836	0.638	13.94	9.72	10.25	9.01	10.80	8.36	12.07	9.31	10.38	9.50
MRPS36	SLC37A4	677	921	800	977	680	0.121	9.35	9.11	9.18	8.69	9.84	12.96	8.68	8.75	10.41	10.92
ACOT9	SLC38A1	613	751	996	877	347	0.622	11.15	11.48	8.73	11.89	9.56	9.83	10.94	11.15	10.62	13.27
AMPD3	SLC38A1	427	407	793	336	713	0.479	11.34	11.48	9.32	11.89	7.03	9.83	9.17	11.15	12.10	13.27
APH1B	SLC38A1	72	690	920	814	331	0.588	10.85	11.48	9.34	11.89	7.64	9.83	9.53	11.15	8.68	13.27
ARPC1B	SLC38A1	59	162	993	825	235	0.824	13.85	11.48	7.87	11.89	10.77	9.83	12.41	11.15	8.85	13.27
ATP2B4	SLC38A1	570	942	997	728	68	0.624	12.47	11.48	12.63	11.89	11.68	9.83	13.52	11.15	10.86	13.27
CAP1	SLC38A1	90	894	994	939	670	0.486	15.51	11.48	12.28	11.89	12.26	9.83	13.94	11.15	11.20	13.27
CDC42SE1	SLC38A1	401	681	980	667	425	0.786	14.50	11.48	11.10	11.89	11.08	9.83	12.81	11.15	10.91	13.27
CYTH3	SLC38A1	948	950	659	609	205	0.104	9.37	11.48	11.55	11.89	8.76	9.83	11.32	11.15	10.66	13.27
DUSP22	SLC38A1	319	817	974	702	721	0.578	11.74	11.48	10.74	11.89	10.88	9.83	11.51	11.15	11.48	13.27
GAS7	SLC38A1	30	922	883	685	3	0.482	13.36	11.48	14.35	11.89	7.49	9.83	11.95	11.15	9.20	13.27
IER3	SLC38A1	491	116	914	15	9	0.828	10.97	11.48	6.57	11.89	9.72	9.83	10.59	11.15	7.57	13.27
IFNGR2	SLC38A1	129	876	967	670	23	0.661	12.94	11.48	9.98	11.89	10.21	9.83	11.01	11.15	9.78	13.27
IQGAP1	SLC38A1	289	41	909	735	473	0.701	14.25	11.48	10.93	11.89	10.17	9.83	13.94	11.15	12.39	13.27
ITGAV	SLC38A1	882	380	980	478	493	0.769	8.62	11.48	11.55	11.89	10.52	9.83	12.42	11.15	11.37	13.27
ITGB5	SLC38A1	124	50	971	534	652	0.849	9.80	11.48	10.23	11.89	12.45	9.83	12.66	11.15	11.23	13.27
KCTD10	SLC38A1	945	906	962	777	290	0.360	10.70	11.48	10.51	11.89	9.97	9.83	12.14	11.15	10.21	13.27
LAMC1	SLC38A1	211	503	855	790	637	0.495	8.97	11.48	9.52	11.89	10.85	9.83	14.22	11.15	13.10	13.27
MPZL1	SLC38A1	61	566	994	902	85	0.754	11.41	11.48	10.19	11.89	10.54	9.83	11.97	11.15	10.09	13.27
MSN	SLC38A1	682	30	998	759	347	0.775	15.53	11.48	11.71	11.89	12.67	9.83	15.62	11.15	12.24	13.27
MVP	SLC38A1	130	13	975	899	396	0.750	14.01	11.48	10.24	11.89	12.22	9.83	13.72	11.15	11.52	13.27
PALLD	SLC38A1	706	30	953	511	487	0.797	8.69	11.48	11.00	11.89	10.51	9.83	13.81	11.15	13.70	13.27
RASSF3	SLC38A1	446	794	872	645	18	0.524	12.35	11.48	7.53	11.89	8.62	9.83	11.14	11.15	9.47	13.27
RNF145	SLC38A1	529	974	957	978	204	0.443	11.69	11.48	11.21	11.89	9.81	9.83	12.95	11.15	10.01	13.27
SERPINB1	SLC38A1	31	100	999	662	461	0.917	14.27	11.48	8.36	11.89	10.48	9.83	12.78	11.15	10.88	13.27
MFN2	SLC39A14	151	626	889	396	77	0.715	12.77	8.03	12.93	9.97	12.80	15.51	12.27	11.00	14.27	11.09
RBM47	SLC39A14	86	668	536	173	512	0.048	11.56	8.03	3.69	9.97	11.90	15.51	10.67	11.00	5.95	11.09
ACSS2	SLC39A5	81	453	795	268	470	0.590	11.19	4.00	10.40	2.57	12.50	12.91	12.02	2.74	12.83	3.22
ALAD	SLC39A5	306	414	876	697	388	0.653	10.83	4.00	12.12	2.57	13.07	12.91	10.56	2.74	10.62	3.22
ARL6IP4	SLC39A5	444	534	710	739	564	0.266	11.78	4.00	12.07	2.57	12.40	12.91	11.58	2.74	11.86	3.22
C8orf82	SLC39A5	573	572	940	730	356	0.693	9.32	4.00	9.05	2.57	11.26	12.91	8.99	2.74	9.62	3.22
CNNM3	SLC39A5	519	511	708	722	430	0.297	9.86	4.00	8.93	2.57	10.56	12.91	9.25	2.74	10.12	3.22
EI24	SLC39A5	395	234	652	457	220	0.304	9.75	4.00	11.16	2.57	13.27	12.91	11.32	2.74	12.21	3.22
FOXRED1	SLC39A5	433	514	696	714	373	0.287	9.86	4.00	10.69	2.57	10.99	12.91	8.59	2.74	10.03	3.22
GET4	SLC39A5	235	379	749	527	498	0.484	7.93	4.00	5.99	2.57	7.68	12.91	5.63	2.74	7.81	3.22
HDLBP	SLC39A5	471	277	8	516	372	0.000	12.82	4.00	13.18	2.57	14.34	12.91	14.31	2.74	14.73	3.22
HSBP1L1	SLC39A5	608	525	617	600	175	0.117	8.04	4.00	7.51	2.57	10.03	12.91	8.31	2.74	7.91	3.22
IDNK	SLC39A5	41	470	969	585	422	0.895	8.98	4.00	8.44	2.57	9.67	12.91	6.55	2.74	6.39	3.22
MARC1	SLC39A5	16	383	719	417	330	0.438	11.50	4.00	8.34	2.57	11.33	12.91	8.39	2.74	8.33	3.22
MICU1	SLC39A5	73	402	942	474	268	0.884	11.89	4.00	11.75	2.57	11.68	12.91	10.82	2.74	11.83	3.22
MMAB	SLC39A5	610	521	835	499	469	0.605	8.67	4.00	9.74	2.57	12.02	12.91	9.35	2.74	10.04	3.22
MRPS2	SLC39A5	676	442	149	568	451	0.000	9.66	4.00	9.75	2.57	10.95	12.91	9.02	2.74	10.69	3.22
MRPS26	SLC39A5	624	510	511	685	593	0.001	9.48	4.00	10.70	2.57	11.32	12.91	9.38	2.74	10.32	3.22
MSRA	SLC39A5	131	407	717	290	331	0.434	10.75	4.00	9.28	2.57	10.89	12.91	8.24	2.74	8.85	3.22
NME4	SLC39A5	532	644	696	677	378	0.215	10.58	4.00	10.84	2.57	12.37	12.91	10.41	2.74	9.91	3.22
OCEL1	SLC39A5	391	385	918	834	496	0.669	9.73	4.00	8.61	2.57	10.76	12.91	8.54	2.74	8.70	3.22
PEBP1	SLC39A5	703	336	945	545	453	0.766	10.84	4.00	15.69	2.57	15.39	12.91	12.99	2.74	13.61	3.22
PEMT	SLC39A5	557	519	947	646	472	0.783	8.75	4.00	8.62	2.57	12.54	12.91	8.89	2.74	9.18	3.22
PHGDH	SLC39A5	510	231	819	352	312	0.633	8.21	4.00	12.10	2.57	12.30	12.91	9.45	2.74	6.97	3.22
POLD2	SLC39A5	667	480	335	611	546	0.000	10.09	4.00	10.84	2.57	12.14	12.91	10.61	2.74	11.92	3.22
PPP6R2	SLC39A5	237	448	646	646	467	0.219	11.72	4.00	12.05	2.57	12.69	12.91	11.62	2.74	12.24	3.22
PTOV1	SLC39A5	515	435	340	809	558	0.000	10.87	4.00	11.25	2.57	10.67	12.91	10.03	2.74	11.17	3.22
QDPR	SLC39A5	588	242	970	645	242	0.824	9.09	4.00	13.37	2.57	12.86	12.91	9.44	2.74	10.77	3.22
RFNG	SLC39A5	503	648	847	858	555	0.417	10.84	4.00	10.62	2.57	11.97	12.91	10.20	2.74	10.79	3.22
RING1	SLC39A5	648	630	518	711	623	0.000	10.60	4.00	11.23	2.57	11.11	12.91	10.90	2.74	10.55	3.22
SELO	SLC39A5	348	705	765	710	413	0.323	11.36	4.00	10.21	2.57	12.67	12.91	10.11	2.74	10.39	3.22
CBL	SLC41A1	46	925	972	823	282	0.570	12.51	9.56	10.31	11.36	9.16	8.89	11.07	11.12	9.55	12.12
ADAP2	SLC44A2	612	579	988	552	688	0.760	10.25	13.99	5.86	12.68	7.47	9.84	8.65	13.68	6.87	13.12
AIF1	SLC44A2	875	257	993	621	670	0.653	12.41	13.99	6.11	12.68	7.75	9.84	10.00	13.68	6.51	13.12
ARL4C	SLC44A2	17	22	776	292	596	0.504	12.00	13.99	10.94	12.68	8.86	9.84	10.55	13.68	7.25	13.12
BLVRA	SLC44A2	570	307	1000	890	937	0.551	10.54	13.99	9.62	12.68	6.99	9.84	10.47	13.68	10.30	13.12
IL10RA	SLC44A2	634	367	994	507	631	0.852	13.01	13.99	6.73	12.68	8.99	9.84	11.33	13.68	7.68	13.12
LY86	SLC44A2	703	236	986	637	560	0.772	10.62	13.99	4.56	12.68	5.22	9.84	7.42	13.68	3.28	13.12
PPT1	SLC44A2	954	394	998	897	922	0.359	13.46	13.99	12.38	12.68	9.82	9.84	12.37	13.68	10.06	13.12
PRF1	SLC44A2	8	281	447	470	431	0.000	13.10	13.99	3.80	12.68	8.16	9.84	9.65	13.68	6.44	13.12
ATG9A	SLC46A1	329	601	826	882	421	0.439	12.65	6.81	12.44	7.67	11.96	10.29	11.78	7.07	13.43	6.93
DEPDC5	SLC46A1	858	446	769	873	656	0.191	9.96	6.81	9.57	7.67	9.89	10.29	8.78	7.07	9.10	6.93
GLRX5	SLC46A1	73	477	764	944	582	0.355	11.37	6.81	10.61	7.67	11.38	10.29	9.48	7.07	11.56	6.93
GPER1	SLC46A1	256	250	874	698	713	0.542	8.66	6.81	9.21	7.67	10.27	10.29	8.09	7.07	7.12	6.93
HDAC3	SLC46A1	686	705	825	961	640	0.222	11.32	6.81	10.25	7.67	10.92	10.29	10.32	7.07	10.80	6.93
KLHDC3	SLC46A1	743	339	873	875	581	0.398	11.43	6.81	13.83	7.67	11.79	10.29	11.23	7.07	12.47	6.93
MRPS26	SLC46A1	884	582	727	986	735	0.072	9.48	6.81	10.70	7.67	11.32	10.29	9.38	7.07	10.32	6.93
MTFR1L	SLC46A1	820	784	782	912	665	0.059	10.55	6.81	11.68	7.67	11.89	10.29	10.51	7.07	12.28	6.93
MTMR4	SLC46A1	583	600	847	975	636	0.361	11.47	6.81	11.52	7.67	12.62	10.29	10.78	7.07	10.06	6.93
NAA60	SLC46A1	502	742	934	881	749	0.431	12.33	6.81	11.95	7.67	12.76	10.29	11.83	7.07	10.88	6.93
NR2F6	SLC46A1	742	442	780	887	649	0.225	7.69	6.81	10.18	7.67	12.52	10.29	9.91	7.07	10.43	6.93
PDXP	SLC46A1	580	78	811	605	513	0.523	5.06	6.81	7.72	7.67	6.30	10.29	2.59	7.07	5.11	6.93
PPP6R2	SLC46A1	667	583	821	910	622	0.295	11.72	6.81	12.05	7.67	12.69	10.29	11.62	7.07	12.24	6.93
PINK1	SLC46A3	911	439	866	934	685	0.274	12.62	10.40	13.91	8.65	12.47	12.01	11.10	9.15	14.15	9.58
RAB31	SLC4A7	153	354	886	608	676	0.630	12.98	9.29	12.76	7.96	8.06	8.33	12.40	10.25	9.03	9.86
ARHGEF6	SLC6A6	826	111	889	581	11	0.575	11.94	14.10	10.49	10.22	8.77	8.34	11.28	12.50	11.80	11.97
ARL4C	SLC6A6	12	680	980	670	170	0.785	12.00	14.10	10.94	10.22	8.86	8.34	10.55	12.50	7.25	11.97
ARPC1B	SLC6A6	896	303	931	581	227	0.624	13.85	14.10	7.87	10.22	10.77	8.34	12.41	12.50	8.85	11.97
ARPC2	SLC6A6	969	748	977	877	361	0.407	14.63	14.10	12.36	10.22	11.91	8.34	13.74	12.50	13.04	11.97
BACE2	SLC6A6	34	309	880	542	166	0.739	8.50	14.10	7.28	10.22	8.28	8.34	10.19	12.50	9.34	11.97
CAPZA1	SLC6A6	976	668	926	873	780	0.229	13.33	14.10	10.67	10.22	11.79	8.34	12.42	12.50	10.85	11.97
CCDC109B	SLC6A6	457	346	987	582	76	0.933	10.24	14.10	5.46	10.22	6.05	8.34	8.12	12.50	6.87	11.97
CCND3	SLC6A6	928	352	968	651	643	0.575	14.09	14.10	11.74	10.22	9.88	8.34	12.72	12.50	9.70	11.97
CMTM7	SLC6A6	693	369	995	674	248	0.806	11.80	14.10	4.61	10.22	7.65	8.34	10.12	12.50	7.08	11.97
CRLF3	SLC6A6	970	705	920	716	451	0.419	11.08	14.10	7.83	10.22	8.17	8.34	9.01	12.50	8.02	11.97
FRMD8	SLC6A6	980	705	902	846	668	0.243	11.17	14.10	9.52	10.22	9.99	8.34	11.07	12.50	10.02	11.97
GMFG	SLC6A6	907	345	987	723	376	0.659	13.33	14.10	6.14	10.22	8.21	8.34	10.84	12.50	7.39	11.97
IKZF1	SLC6A6	897	287	889	700	349	0.483	12.91	14.10	4.65	10.22	7.92	8.34	10.14	12.50	6.36	11.97
KCTD12	SLC6A6	945	366	947	393	265	0.671	11.50	14.10	10.38	10.22	8.50	8.34	12.91	12.50	10.85	11.97
LAIR1	SLC6A6	679	274	983	601	231	0.826	12.34	14.10	5.85	10.22	7.48	8.34	11.06	12.50	6.67	11.97
MB21D2	SLC6A6	114	644	913	527	131	0.741	6.56	14.10	7.59	10.22	4.99	8.34	7.56	12.50	8.03	11.97
PAG1	SLC6A6	863	790	943	779	445	0.420	12.55	14.10	9.24	10.22	9.95	8.34	12.30	12.50	8.65	11.97
PFKP	SLC6A6	62	780	985	685	835	0.570	10.85	14.10	13.22	10.22	7.82	8.34	10.46	12.50	11.33	11.97
PIP4K2A	SLC6A6	156	295	982	757	516	0.828	12.81	14.10	12.30	10.22	9.82	8.34	11.13	12.50	8.83	11.97
PNMA1	SLC6A6	588	668	984	574	600	0.753	9.65	14.10	12.96	10.22	7.99	8.34	9.87	12.50	9.47	11.97
PPP1R12A	SLC6A6	957	650	910	659	444	0.461	11.64	14.10	10.77	10.22	10.18	8.34	11.85	12.50	11.27	11.97
RAP2B	SLC6A6	626	474	944	546	296	0.802	11.07	14.10	8.42	10.22	9.03	8.34	9.95	12.50	7.85	11.97
SEL1L3	SLC6A6	719	556	970	583	54	0.761	11.51	14.10	9.52	10.22	8.90	8.34	11.23	12.50	7.46	11.97
SLC38A1	SLC6A6	303	725	910	534	634	0.624	11.48	14.10	11.89	10.22	9.83	8.34	11.15	12.50	13.27	11.97
C12orf49	SLC7A1	446	750	977	937	840	0.441	9.22	9.36	9.36	11.21	8.49	7.50	10.34	9.70	7.84	8.53
CSNK1D	SLC7A1	68	856	954	757	812	0.446	13.40	9.36	12.49	11.21	12.17	7.50	13.04	9.70	12.76	8.53
ELF3	SLC7A1	277	279	886	526	221	0.759	6.50	9.36	2.97	11.21	11.45	7.50	11.39	9.70	4.44	8.53
LEPROTL1	SLC7A1	615	929	921	336	326	0.574	11.33	9.36	10.27	11.21	10.06	7.50	10.34	9.70	9.47	8.53
METTL9	SLC7A1	47	874	799	526	565	0.403	13.32	9.36	11.71	11.21	9.29	7.50	11.21	9.70	11.61	8.53
PELO	SLC7A1	125	946	700	450	555	0.273	10.71	9.36	8.55	11.21	10.29	7.50	10.43	9.70	10.33	8.53
RNF145	SLC7A1	176	885	927	918	724	0.341	11.69	9.36	11.21	11.21	9.81	7.50	12.95	9.70	10.01	8.53
SERPINB1	SLC7A1	15	285	994	755	872	0.674	14.27	9.36	8.36	11.21	10.48	7.50	12.78	9.70	10.88	8.53
C1orf198	SLC7A6	669	117	906	404	976	0.524	8.35	9.51	11.86	7.72	10.07	6.76	12.70	9.37	12.61	12.08
PALLD	SLC7A6	761	61	937	447	641	0.673	8.69	9.51	11.00	7.72	10.51	6.76	13.81	9.37	13.70	12.08
RHBDF2	SLC7A6	765	219	956	370	801	0.629	12.50	9.51	7.71	7.72	9.01	6.76	11.01	9.37	9.71	12.08
SEL1L3	SLC7A7	518	50	995	896	744	0.661	11.51	12.86	9.52	4.90	8.90	7.96	11.23	10.96	7.46	6.66
SLC44A2	SLC7A7	947	500	998	844	672	0.514	13.99	12.86	12.68	4.90	9.84	7.96	13.68	10.96	13.12	6.66
LRRC20	SLC9A3R1	591	28	784	748	13	0.399	7.73	13.00	11.29	11.37	11.03	13.34	7.75	9.67	13.05	7.75
MGAT4B	SLC9A3R1	858	112	751	836	781	0.126	11.53	13.00	11.44	11.37	13.85	13.34	12.16	9.67	11.03	7.75
HAGH	SLCO2B1	113	117	970	822	347	0.779	11.71	7.38	11.55	11.10	12.58	14.15	10.14	12.68	12.09	8.88
ING1	SLCO2B1	547	346	810	147	606	0.543	10.59	7.38	8.50	11.10	9.47	14.15	8.94	12.68	8.97	8.88
ACTA2	SLCO3A1	500	121	845	390	368	0.690	9.32	12.09	8.68	9.80	11.01	8.14	14.17	10.73	11.33	9.05
AEBP1	SLCO3A1	110	68	993	636	771	0.782	9.24	12.09	11.07	9.80	11.28	8.14	14.79	10.73	10.88	9.05
ARL4C	SLCO3A1	19	223	979	736	746	0.717	12.00	12.09	10.94	9.80	8.86	8.14	10.55	10.73	7.25	9.05
BACE2	SLCO3A1	69	463	864	861	808	0.394	8.50	12.09	7.28	9.80	8.28	8.14	10.19	10.73	9.34	9.05
BCL2	SLCO3A1	175	110	988	603	496	0.924	10.02	12.09	9.58	9.80	7.28	8.14	8.96	10.73	10.41	9.05
CCND2	SLCO3A1	91	317	955	724	820	0.638	11.18	12.09	11.92	9.80	7.97	8.14	11.63	10.73	8.32	9.05
COL1A1	SLCO3A1	34	180	949	350	649	0.824	8.40	12.09	6.87	9.80	11.90	8.14	14.71	10.73	10.66	9.05
CYTH3	SLCO3A1	582	463	963	650	903	0.609	9.37	12.09	11.55	9.80	8.76	8.14	11.32	10.73	10.66	9.05
FSTL1	SLCO3A1	382	138	949	634	695	0.734	8.75	12.09	10.39	9.80	11.17	8.14	14.56	10.73	11.59	9.05
FSTL3	SLCO3A1	399	612	964	759	628	0.678	9.10	12.09	9.56	9.80	9.80	8.14	13.14	10.73	9.14	9.05
GLS	SLCO3A1	501	548	987	831	881	0.594	11.04	12.09	12.80	9.80	9.64	8.14	12.55	10.73	10.56	9.05
GUCY1A3	SLCO3A1	340	386	960	565	754	0.760	6.77	12.09	8.59	9.80	8.17	8.14	9.91	10.73	8.44	9.05
IGFBP7	SLCO3A1	726	108	998	701	694	0.685	10.42	12.09	11.28	9.80	12.67	8.14	14.10	10.73	11.84	9.05
JAK3	SLCO3A1	989	555	970	659	559	0.569	14.18	12.09	8.99	9.80	8.48	8.14	10.98	10.73	7.03	9.05
KCTD10	SLCO3A1	570	768	985	943	897	0.381	10.70	12.09	10.51	9.80	9.97	8.14	12.14	10.73	10.21	9.05
LAMC1	SLCO3A1	639	282	826	779	840	0.280	8.97	12.09	9.52	9.80	10.85	8.14	14.22	10.73	13.10	9.05
NDN	SLCO3A1	351	544	991	764	754	0.701	6.00	12.09	10.80	9.80	7.50	8.14	9.78	10.73	8.89	9.05
PNMA1	SLCO3A1	639	555	952	836	867	0.456	9.65	12.09	12.96	9.80	7.99	8.14	9.87	10.73	9.47	9.05
PRICKLE1	SLCO3A1	608	452	940	548	612	0.746	5.73	12.09	8.28	9.80	5.10	8.14	7.32	10.73	6.78	9.05
PRSS23	SLCO3A1	20	265	889	660	294	0.698	8.99	12.09	7.83	9.80	9.07	8.14	12.44	10.73	9.79	9.05
PTGDS	SLCO3A1	39	416	796	188	346	0.592	10.48	12.09	15.98	9.80	9.68	8.14	13.35	10.73	10.22	9.05
SERPINE2	SLCO3A1	193	16	990	599	446	0.930	7.32	12.09	12.58	9.80	8.07	8.14	8.87	10.73	7.91	9.05
PON2	SLIRP	779	343	938	789	754	0.465	8.34	7.93	12.59	9.94	12.88	10.03	12.64	8.61	9.48	10.77
DENND5A	SMAD3	285	494	887	983	639	0.511	13.06	10.53	12.69	11.22	10.39	11.43	12.32	11.79	11.13	12.56
MMD	SMAD5	896	304	875	866	893	0.192	9.49	9.14	10.49	9.54	8.76	11.16	9.36	11.06	8.19	11.13
GNA12	SMAP1	360	100	955	898	731	0.596	11.18	8.88	12.20	7.08	10.58	6.79	11.64	6.83	10.36	9.20
MPZL1	SMAP1	457	668	984	906	248	0.681	11.41	8.88	10.19	7.08	10.54	6.79	11.97	6.83	10.09	9.20
ADAM19	SMARCA5	806	700	883	99	23	0.513	12.45	10.76	8.38	11.29	9.65	10.77	10.55	11.85	8.32	11.47
E2F3	SMARCA5	930	687	954	782	774	0.322	10.53	10.76	8.80	11.29	8.37	10.77	8.99	11.85	10.01	11.47
IER3	SMARCA5	509	396	809	26	74	0.614	10.97	10.76	6.57	11.29	9.72	10.77	10.59	11.85	7.57	11.47
IFNGR2	SMARCA5	768	808	986	748	447	0.560	12.94	10.76	9.98	11.29	10.21	10.77	11.01	11.85	9.78	11.47
ITGB5	SMARCA5	326	508	987	690	958	0.646	9.80	10.76	10.23	11.29	12.45	10.77	12.66	11.85	11.23	11.47
MMD	SMARCA5	881	656	970	698	745	0.450	9.49	10.76	10.49	11.29	8.76	10.77	9.36	11.85	8.19	11.47
PTGFRN	SMARCA5	603	658	999	699	146	0.768	6.90	10.76	9.55	11.29	9.94	10.77	9.72	11.85	8.40	11.47
RAB31	SMARCA5	804	554	976	859	630	0.528	12.98	10.76	12.76	11.29	8.06	10.77	12.40	11.85	9.03	11.47
COL1A1	SMARCD3	45	69	959	517	625	0.847	8.40	11.39	6.87	12.36	11.90	8.16	14.71	10.62	10.66	12.32
JAM3	SMARCD3	430	320	992	298	731	0.869	8.47	11.39	10.95	12.36	7.93	8.16	11.29	10.62	9.16	12.32
ARL4C	SMCHD1	236	582	965	715	503	0.780	12.00	13.15	10.94	10.53	8.86	10.71	10.55	12.17	7.25	11.23
CCND3	SMCHD1	629	752	884	454	866	0.395	14.09	13.15	11.74	10.53	9.88	10.71	12.72	12.17	9.70	11.23
CMBL	SMIM14	40	801	904	942	109	0.456	7.17	10.41	9.51	10.59	12.25	13.28	8.09	10.90	12.16	9.28
SFXN1	SMIM14	826	994	944	672	850	0.242	10.52	10.41	10.97	10.59	12.38	13.28	9.19	10.90	9.56	9.28
NAAA	SMIM19	800	937	980	905	884	0.197	11.23	8.95	8.10	9.46	10.67	10.58	9.41	8.83	8.49	10.48
SLC7A1	SMIM3	0	0	0	255	0	0.000	9.36	1.37	11.21	0.19	7.50	0.37	9.70	1.32	8.53	1.81
ALKBH7	SMOC1	373	320	709	500	386	0.418	10.62	4.27	9.79	10.29	11.53	12.48	9.51	4.76	11.11	9.64
BDH1	SMOC1	447	152	399	236	244	0.000	9.07	4.27	11.12	10.29	13.56	12.48	7.26	4.76	9.22	9.64
C11orf71	SMOC1	101	108	96	50	47	0.000	0.00	4.27	0.00	10.29	0.00	12.48	0.00	4.76	0.00	9.64
CISD3	SMOC1	390	178	723	175	458	0.446	9.61	4.27	9.44	10.29	11.98	12.48	8.97	4.76	9.98	9.64
CMBL	SMOC1	347	547	367	360	463	0.000	7.17	4.27	9.51	10.29	12.25	12.48	8.09	4.76	12.16	9.64
DCAF11	SMOC1	251	216	828	416	533	0.639	12.42	4.27	12.33	10.29	13.56	12.48	11.24	4.76	12.31	9.64
HAGH	SMOC1	161	156	720	472	492	0.440	11.71	4.27	11.55	10.29	12.58	12.48	10.14	4.76	12.09	9.64
LIME1	SMOC1	336	264	345	419	553	0.000	11.54	4.27	10.12	10.29	12.67	12.48	8.81	4.76	8.56	9.64
MACROD1	SMOC1	580	301	332	473	509	0.000	7.28	4.27	8.34	10.29	10.09	12.48	7.88	4.76	12.58	9.64
MPND	SMOC1	313	62	457	351	626	0.000	9.56	4.27	9.25	10.29	9.54	12.48	7.68	4.76	8.64	9.64
NAPRT1	SMOC1	143	188	733	379	433	0.466	11.51	4.27	8.44	10.29	12.12	12.48	9.96	4.76	9.48	9.64
NUDT16	SMOC1	32	616	763	264	579	0.428	11.71	4.27	12.01	10.29	12.06	12.48	11.74	4.76	11.21	9.64
PCBD1	SMOC1	360	460	763	292	742	0.405	9.09	4.27	10.21	10.29	13.15	12.48	10.08	4.76	10.65	9.64
PDXP	SMOC1	334	30	606	287	417	0.212	5.06	4.27	7.72	10.29	6.30	12.48	2.59	4.76	5.11	9.64
PQLC1	SMOC1	86	156	857	401	23	0.714	12.31	4.27	12.42	10.29	13.59	12.48	11.51	4.76	12.16	9.64
NUPR1	SMUG1	12	2	886	922	734	0.462	7.17	9.64	8.81	9.21	13.21	10.11	12.42	8.36	10.94	9.66
SERPINE2	SMURF2	608	702	881	116	262	0.607	7.32	9.85	12.58	9.42	8.07	8.56	8.87	10.96	7.91	9.67
GPER1	SNAP47	153	148	880	620	766	0.567	8.66	9.80	9.21	11.19	10.27	10.00	8.09	8.95	7.12	10.60
GPCPD1	SNHG12	507	403	677	858	791	0.173	13.13	9.21	11.10	7.16	10.29	8.20	12.80	9.58	11.02	8.65
RHOQ	SNHG12	359	654	986	954	53	0.668	10.93	9.21	10.93	7.16	9.91	8.20	11.66	9.58	12.70	8.65
SLC1A3	SNHG12	5	304	460	330	399	0.000	9.11	9.21	15.59	7.16	6.22	8.20	9.85	9.58	10.25	8.65
CRISPLD2	SNHG15	2	357	795	734	900	0.326	12.06	9.96	7.70	8.69	9.54	8.61	13.48	9.81	10.43	8.23
AOAH	SNN	747	478	748	574	175	0.336	12.91	12.67	4.85	13.87	7.34	8.54	8.81	10.71	4.97	12.85
ARHGEF18	SNN	867	808	922	429	777	0.368	12.04	12.67	11.03	13.87	10.60	8.54	11.09	10.71	9.41	12.85
C1QA	SNN	74	223	944	194	262	0.888	10.63	12.67	7.16	13.87	9.61	8.54	12.90	10.71	8.16	12.85
C1orf162	SNN	481	207	881	105	552	0.736	13.64	12.67	7.02	13.87	8.88	8.54	10.81	10.71	8.91	12.85
CCDC109B	SNN	585	460	941	273	216	0.840	10.24	12.67	5.46	13.87	6.05	8.54	8.12	10.71	6.87	12.85
CCND3	SNN	796	763	942	694	675	0.420	14.09	12.67	11.74	13.87	9.88	8.54	12.72	10.71	9.70	12.85
CD53	SNN	817	651	953	381	431	0.672	15.30	12.67	8.05	13.87	8.96	8.54	12.14	10.71	7.24	12.85
CD74	SNN	258	200	846	632	140	0.626	16.09	12.67	11.52	13.87	13.32	8.54	16.98	10.71	12.63	12.85
CRLF3	SNN	776	769	855	658	570	0.324	11.08	12.67	7.83	13.87	8.17	8.54	9.01	10.71	8.02	12.85
HLA-DMA	SNN	311	194	543	503	150	0.085	11.56	12.67	6.73	13.87	8.90	8.54	12.02	10.71	8.66	12.85
HLA-DPA1	SNN	168	244	777	499	112	0.554	12.85	12.67	8.10	13.87	10.06	8.54	13.95	10.71	9.82	12.85
HLA-DRB6	SNN	154	119	594	270	81	0.188	7.83	12.67	1.71	13.87	4.30	8.54	6.79	10.71	4.83	12.85
IFI16	SNN	789	132	808	874	417	0.318	13.36	12.67	8.76	13.87	9.65	8.54	12.86	10.71	10.18	12.85
IQGAP1	SNN	508	14	955	297	253	0.906	14.25	12.67	10.93	13.87	10.17	8.54	13.94	10.71	12.39	12.85
LAIR1	SNN	277	221	958	95	275	0.916	12.34	12.67	5.85	13.87	7.48	8.54	11.06	10.71	6.67	12.85
LY86	SNN	578	330	922	116	157	0.805	10.62	12.67	4.56	13.87	5.22	8.54	7.42	10.71	3.28	12.85
RAP2B	SNN	563	973	850	264	334	0.493	11.07	12.67	8.42	13.87	9.03	8.54	9.95	10.71	7.85	12.85
S100A4	SNN	665	121	913	549	86	0.719	14.62	12.67	4.97	13.87	8.19	8.54	13.25	10.71	10.11	12.85
SEL1L3	SNN	521	526	975	388	212	0.926	11.51	12.67	9.52	13.87	8.90	8.54	11.23	10.71	7.46	12.85
MPZL1	SNRPD1	159	842	998	965	780	0.453	11.41	8.68	10.19	9.40	10.54	9.29	11.97	9.12	10.09	9.85
GNA12	SNTB2	147	365	966	847	965	0.526	11.18	10.68	12.20	9.58	10.58	9.46	11.64	11.16	10.36	10.36
SMG5	SNX17	939	947	970	900	966	0.064	12.64	12.27	12.56	11.77	12.52	11.98	12.38	11.91	12.69	11.25
ATL3	SNX25	230	368	964	727	953	0.588	11.01	7.90	9.69	8.97	11.60	8.99	12.12	10.41	10.15	9.79
SAMD8	SNX25	715	856	999	240	970	0.477	11.12	7.90	11.25	8.97	9.48	8.99	10.82	10.41	11.92	9.79
SH3GLB1	SNX25	23	502	999	633	974	0.694	13.20	7.90	11.02	8.97	11.12	8.99	12.52	10.41	13.55	9.79
PECR	SOD1	88	699	912	886	527	0.518	9.87	11.36	6.19	13.71	11.62	14.64	7.03	11.98	7.21	12.88
RORC	SOD1	706	70	398	623	508	0.000	8.06	11.36	2.25	13.71	12.67	14.64	8.15	11.98	12.95	12.88
SEPSECS	SOD1	471	474	858	571	717	0.572	8.60	11.36	7.33	13.71	11.39	14.64	9.04	11.98	9.09	12.88
DIEXF	SOD2	526	588	970	29	834	0.716	9.01	15.24	8.79	13.17	9.61	15.30	8.34	15.45	9.23	16.61
ELF3	SOD2	504	68	983	487	26	0.964	6.50	15.24	2.97	13.17	11.45	15.30	11.39	15.45	4.44	16.61
RBL2	SORD	779	899	925	532	518	0.486	12.35	9.38	10.82	8.64	11.95	13.73	12.15	7.64	11.79	8.02
ADIPOR2	SORL1	683	152	760	653	402	0.352	11.66	14.93	11.71	13.06	12.99	13.18	12.53	11.79	11.90	7.44
ECHDC2	SORL1	43	178	845	354	734	0.573	10.04	14.93	10.14	13.06	14.81	13.18	11.26	11.79	11.29	7.44
MUM1	SORL1	103	918	719	530	614	0.257	9.93	14.93	12.33	13.06	11.72	13.18	10.80	11.79	10.24	7.44
MXI1	SORL1	34	440	730	529	318	0.446	12.17	14.93	11.92	13.06	10.98	13.18	10.60	11.79	11.32	7.44
ACOT9	SOX4	762	634	747	685	642	0.140	11.15	8.39	8.73	7.77	9.56	7.90	10.94	10.48	10.62	8.03
ANXA11	SOX4	430	559	868	490	607	0.653	14.17	8.39	12.34	7.77	11.72	7.90	13.42	10.48	13.41	8.03
ARRDC2	SOX4	486	37	979	8	20	0.958	12.03	8.39	10.43	7.77	10.05	7.90	12.48	10.48	13.11	8.03
ELF3	SOX4	303	324	850	301	256	0.700	6.50	8.39	2.97	7.77	11.45	7.90	11.39	10.48	4.44	8.03
HEYL	SOX4	337	174	859	221	598	0.669	4.86	8.39	7.41	7.77	8.23	7.90	11.16	10.48	9.05	8.03
PAM	SOX4	630	746	875	626	588	0.455	10.75	8.39	11.67	7.77	9.43	7.90	12.84	10.48	12.91	8.03
SLCO3A1	SOX4	578	129	914	646	723	0.605	12.09	8.39	9.80	7.77	8.14	7.90	10.73	10.48	9.05	8.03
ANK3	SPARC	135	111	974	102	363	0.948	7.81	12.02	12.43	13.41	9.32	12.88	9.27	16.25	11.64	13.44
PDP1	SPARC	207	146	934	466	499	0.868	8.66	12.02	11.76	13.41	7.82	12.88	9.24	16.25	9.83	13.44
SLC25A36	SPARC	57	369	986	459	651	0.896	9.79	12.02	11.23	13.41	8.12	12.88	11.92	16.25	11.87	13.44
SLCO3A1	SPARC	594	300	980	665	784	0.689	12.09	12.02	9.80	13.41	8.14	12.88	10.73	16.25	9.05	13.44
AACS	SPON2	728	736	821	645	275	0.338	9.30	11.62	11.54	8.88	8.69	12.13	9.50	11.76	9.15	9.01
CD59	SPON2	1	39	884	337	440	0.768	12.06	11.62	13.27	8.88	12.66	12.13	15.08	11.76	13.88	9.01
SIRT5	SPSB3	625	850	984	896	263	0.532	10.05	11.03	9.90	9.02	10.80	10.13	8.62	9.22	10.53	10.35
SLC39A5	SPSB3	379	567	920	663	517	0.717	4.00	11.03	2.57	9.02	12.91	10.13	2.74	9.22	3.22	10.35
ARPC2	SPTLC2	986	649	1000	913	794	0.329	14.63	12.63	12.36	10.67	11.91	9.50	13.74	11.12	13.04	9.66
C12orf49	SPTLC2	711	460	981	896	916	0.451	9.22	12.63	9.36	10.67	8.49	9.50	10.34	11.12	7.84	9.66
CCDC109B	SPTLC2	250	702	963	854	886	0.455	10.24	12.63	5.46	10.67	6.05	9.50	8.12	11.12	6.87	9.66
FTSJ1	SPTLC2	32	761	986	949	986	0.374	10.23	12.63	9.43	10.67	9.46	9.50	9.93	11.12	9.87	9.66
MMD	SPTLC2	420	513	939	708	726	0.654	9.49	12.63	10.49	10.67	8.76	9.50	9.36	11.12	8.19	9.66
FARSB	SQSTM1	804	652	923	838	977	0.237	9.69	12.49	10.92	12.11	10.10	12.99	9.67	13.08	11.28	14.38
ADO	SRGN	623	71	832	359	423	0.603	9.12	16.61	10.15	9.17	8.75	10.02	8.81	13.66	9.94	9.93
DNAJA4	SRGN	12	401	879	367	300	0.758	10.69	16.61	12.11	9.17	7.50	10.02	10.03	13.66	11.99	9.93
HSPA14	SRGN	836	410	831	668	737	0.294	9.38	16.61	8.99	9.17	9.18	10.02	9.11	13.66	10.15	9.93
PFKP	SRGN	64	181	938	635	527	0.795	10.85	16.61	13.22	9.17	7.82	10.02	10.46	13.66	11.33	9.93
EHD4	SRP19	755	340	908	905	624	0.424	10.39	9.66	7.45	9.75	9.74	10.49	10.94	9.46	9.25	10.07
PRRC1	SRPK1	596	748	931	674	633	0.536	9.78	12.93	8.79	10.12	11.24	10.43	10.75	10.26	10.12	10.77
ALDH2	SS18L1	476	116	392	798	585	0.000	12.31	9.30	14.12	10.53	15.62	12.01	13.79	10.06	13.17	10.52
CAT	SS18L1	532	236	313	610	872	0.000	13.04	9.30	10.23	10.53	14.24	12.01	12.43	10.06	12.34	10.52
MXI1	SS18L1	334	690	715	814	877	0.120	12.17	9.30	11.92	10.53	10.98	12.01	10.60	10.06	11.32	10.52
PRDX6	SS18L1	246	179	204	658	952	0.000	12.94	9.30	12.59	10.53	14.11	12.01	13.29	10.06	14.59	10.52
SPTLC2	SSB	383	704	998	977	990	0.410	12.63	9.70	10.67	10.96	9.50	10.61	11.12	10.73	9.66	10.92
FBLIM1	SSBP2	223	242	875	473	684	0.658	5.78	9.22	5.86	10.32	8.75	7.47	11.52	9.77	8.50	10.25
MARVELD1	SSBP2	517	678	903	894	821	0.351	9.90	9.22	8.01	10.32	8.46	7.47	11.49	9.77	8.90	10.25
RAB34	SSBP2	667	140	873	734	888	0.359	9.98	9.22	9.24	10.32	7.78	7.47	11.05	9.77	8.81	10.25
ARL4C	SSH2	5	516	818	225	379	0.628	12.00	13.72	10.94	9.90	8.86	9.60	10.55	12.17	7.25	13.54
BLVRA	SSH2	439	650	971	770	603	0.680	10.54	13.72	9.62	9.90	6.99	9.60	10.47	12.17	10.30	13.54
HK1	SSH2	373	738	950	719	981	0.447	12.83	13.72	13.57	9.90	9.23	9.60	12.57	12.17	13.74	13.54
LBH	SSH2	109	210	652	356	178	0.304	10.01	13.72	6.27	9.90	7.61	9.60	11.41	12.17	8.17	13.54
S100A4	SSH2	740	134	974	362	93	0.828	14.62	13.72	4.97	9.90	8.19	9.60	13.25	12.17	10.11	13.54
SEL1L3	SSH2	745	254	962	600	147	0.751	11.51	13.72	9.52	9.90	8.90	9.60	11.23	12.17	7.46	13.54
SGK223	ST14	587	682	825	866	47	0.353	8.92	10.57	10.06	5.24	7.81	8.82	8.59	10.71	9.09	4.85
C8orf82	ST3GAL1	759	582	558	755	440	0.029	9.32	12.47	9.05	10.05	11.26	13.11	8.99	12.06	9.62	12.59
KLC4	ST3GAL1	800	796	809	600	134	0.270	9.87	12.47	10.43	10.05	12.39	13.11	9.42	12.06	9.92	12.59
NUDT16	ST3GAL1	153	674	961	811	449	0.679	11.71	12.47	12.01	10.05	12.06	13.11	11.74	12.06	11.21	12.59
ORAI3	ST3GAL1	466	388	724	681	69	0.357	10.87	12.47	8.13	10.05	11.61	13.11	9.36	12.06	8.70	12.59
PMM1	ST3GAL1	775	812	902	676	302	0.422	9.88	12.47	10.77	10.05	11.02	13.11	10.05	12.06	8.88	12.59
SAP30L	ST3GAL1	256	710	953	756	767	0.539	10.62	12.47	10.88	10.05	10.30	13.11	10.48	12.06	10.99	12.59
SLC46A1	ST3GAL1	604	573	754	762	17	0.292	6.81	12.47	7.67	10.05	10.29	13.11	7.07	12.06	6.93	12.59
ITCH	ST6GAL1	715	849	932	738	688	0.369	11.74	11.50	10.54	10.39	11.89	15.24	11.20	11.33	11.28	10.03
SEPSECS	ST6GAL1	864	505	799	728	633	0.266	8.60	11.50	7.33	10.39	11.39	15.24	9.04	11.33	9.09	10.03
ALKBH7	ST7	719	592	855	916	598	0.328	10.62	8.96	9.79	9.36	11.53	10.54	9.51	10.22	11.11	9.27
C11orf71	ST7	101	108	96	50	47	0.000	0.00	8.96	0.00	9.36	0.00	10.54	0.00	10.22	0.00	9.27
C2orf47	ST7	203	956	1000	947	696	0.451	8.58	8.96	7.69	9.36	10.11	10.54	7.32	10.22	9.27	9.27
CISD3	ST7	849	467	941	885	681	0.424	9.61	8.96	9.44	9.36	11.98	10.54	8.97	10.22	9.98	9.27
ECI2	ST7	937	622	937	958	490	0.376	9.22	8.96	9.65	9.36	12.22	10.54	9.26	10.22	11.86	9.27
HSD17B10	ST7	860	557	976	904	695	0.444	10.69	8.96	9.29	9.36	12.48	10.54	10.06	10.22	10.76	9.27
KHK	ST7	774	792	919	842	805	0.232	7.27	8.96	8.03	9.36	13.02	10.54	5.47	10.22	6.63	9.27
MRPL37	ST7	969	850	991	931	909	0.152	10.67	8.96	10.64	9.36	11.91	10.54	10.10	10.22	12.11	9.27
PRADC1	ST7	674	763	801	836	775	0.096	8.76	8.96	9.23	9.36	10.60	10.54	7.82	10.22	10.98	9.27
SMIM19	ST7	733	889	955	959	960	0.144	8.95	8.96	9.46	9.36	10.58	10.54	8.83	10.22	10.48	9.27
FAM162A	STARD10	354	621	867	803	642	0.451	9.68	10.43	10.83	9.90	11.58	14.42	9.47	10.28	11.30	11.00
ABLIM3	STAT3	694	144	986	560	356	0.845	9.59	13.96	11.06	11.64	13.51	13.99	11.40	14.33	11.98	13.53
BNIP3	STK16	295	930	956	906	881	0.303	9.50	11.13	11.44	9.37	12.07	10.63	9.81	9.20	12.63	9.09
RHNO1	STK38	431	499	942	590	533	0.823	9.03	12.92	8.76	9.64	7.39	11.14	7.85	11.32	8.34	10.48
ABCC1	STK4	847	867	949	845	708	0.265	10.87	12.96	8.72	9.57	8.42	9.78	11.69	11.46	11.54	9.16
BAG3	STX12	79	91	846	707	863	0.415	10.13	11.06	10.80	11.69	10.72	10.27	11.79	12.29	14.54	10.59
CDKN1A	STX12	247	241	820	686	881	0.387	11.53	11.06	9.70	11.69	12.43	10.27	13.29	12.29	12.99	10.59
ITGAV	STX3	618	302	988	490	803	0.765	8.62	12.90	11.55	10.03	10.52	9.22	12.42	11.92	11.37	9.67
PALLD	STX3	280	34	951	486	791	0.756	8.69	12.90	11.00	10.03	10.51	9.22	13.81	11.92	13.70	9.67
PDGFA	STX3	255	657	975	591	177	0.826	6.37	12.90	9.87	10.03	8.03	9.22	10.20	11.92	10.12	9.67
SMURF2	STX3	837	582	983	902	977	0.317	9.85	12.90	9.42	10.03	8.56	9.22	10.96	11.92	9.67	9.67
SOX4	STX3	551	669	974	309	545	0.816	8.39	12.90	7.77	10.03	7.90	9.22	10.48	11.92	8.03	9.67
LEF1	STX6	545	263	616	743	741	0.093	10.52	11.19	7.93	10.76	4.32	8.93	7.56	10.40	3.91	9.08
SLC7A1	STX6	270	860	807	588	903	0.263	9.36	11.19	11.21	10.76	7.50	8.93	9.70	10.40	8.53	9.08
SEL1L3	STX7	868	508	896	768	857	0.291	11.51	11.76	9.52	11.40	8.90	10.30	11.23	11.76	7.46	10.59
ARPC1B	SUB1	585	216	985	794	565	0.748	13.85	10.88	7.87	12.29	10.77	11.64	12.41	11.67	8.85	11.93
ELOVL1	SUB1	626	73	998	733	834	0.649	11.88	10.88	10.42	12.29	10.69	11.64	11.54	11.67	9.80	11.93
MCU	SUB1	830	782	1000	971	711	0.353	10.56	10.88	8.47	12.29	9.10	11.64	10.02	11.67	11.63	11.93
MPZL1	SUB1	486	630	997	945	706	0.604	11.41	10.88	10.19	12.29	10.54	11.64	11.97	11.67	10.09	11.93
GPT	SULT1A2	78	398	929	765	388	0.726	5.41	7.71	7.40	5.31	12.95	9.99	4.50	7.52	10.46	4.80
PHGDH	SULT1A2	154	107	793	473	598	0.537	8.21	7.71	12.10	5.31	12.30	9.99	9.45	7.52	6.97	4.80
C16orf45	SUN2	756	328	193	644	975	0.000	8.03	13.50	13.31	12.15	9.72	13.11	9.12	13.32	11.79	12.93
CMBL	SUOX	30	832	924	898	673	0.397	7.17	9.65	9.51	9.96	12.25	12.03	8.09	9.41	12.16	10.31
COL26A1	SUOX	101	709	726	20	47	0.347	2.55	9.65	10.71	9.96	7.94	12.03	3.11	9.41	1.06	10.31
DBT	SUOX	755	878	982	990	837	0.238	8.72	9.65	9.65	9.96	11.34	12.03	9.25	9.41	10.85	10.31
FAXDC2	SUOX	70	637	953	595	829	0.625	11.01	9.65	10.92	9.96	12.04	12.03	11.36	9.41	9.41	10.31
PECR	SUOX	913	749	980	977	980	0.150	9.87	9.65	6.19	9.96	11.62	12.03	7.03	9.41	7.21	10.31
PEX11G	SUOX	807	631	951	982	922	0.246	7.53	9.65	5.47	9.96	9.02	12.03	5.78	9.41	6.03	10.31
SLC9A3R1	SURF4	886	329	968	752	906	0.414	13.00	12.43	11.37	11.58	13.34	13.99	9.67	13.15	7.75	11.93
AMICA1	SWAP70	280	251	882	299	782	0.623	13.99	10.57	3.15	9.96	8.01	9.02	10.35	11.86	5.76	10.14
APH1B	SWAP70	322	648	1000	624	758	0.735	10.85	10.57	9.34	9.96	7.64	9.02	9.53	11.86	8.68	10.14
ARPC2	SWAP70	560	486	1000	921	662	0.678	14.63	10.57	12.36	9.96	11.91	9.02	13.74	11.86	13.04	10.14
E2F3	SWAP70	677	465	950	819	349	0.652	10.53	10.57	8.80	9.96	8.37	9.02	8.99	11.86	10.01	10.14
HK1	SWAP70	646	217	996	947	386	0.696	12.83	10.57	13.57	9.96	9.23	9.02	12.57	11.86	13.74	10.14
HN1	SWAP70	237	64	996	731	681	0.786	12.51	10.57	10.72	9.96	9.27	9.02	9.83	11.86	10.96	10.14
PLP2	SWAP70	417	731	985	839	797	0.536	13.24	10.57	5.88	9.96	8.30	9.02	11.00	11.86	10.35	10.14
CIAPIN1	SYNGR2	973	231	998	940	684	0.448	10.19	12.91	10.37	10.05	10.27	11.88	9.97	13.06	10.77	13.30
ITCH	SYNJ2BP	755	912	931	781	376	0.388	11.74	7.50	10.54	6.96	11.89	8.57	11.20	7.89	11.28	9.29
PRKAG2	SYNJ2BP	907	747	399	902	594	0.000	9.86	7.50	10.44	6.96	11.13	8.57	9.85	7.89	9.61	9.29
SFXN1	SYNJ2BP	624	791	791	793	916	0.084	10.52	7.50	10.97	6.96	12.38	8.57	9.19	7.89	9.56	9.29
GLRX2	SYPL1	919	334	986	849	849	0.413	7.99	10.66	7.66	9.77	8.25	11.36	6.41	11.88	8.98	12.45
EXT1	SYS1	813	839	997	356	535	0.650	10.59	10.82	8.85	9.41	11.74	10.45	11.39	10.14	8.74	10.27
HN1	SYS1	834	745	997	968	284	0.470	12.51	10.82	10.72	9.41	9.27	10.45	9.83	10.14	10.96	10.27
MSRA	SYT7	115	986	420	619	552	0.000	10.75	4.41	9.28	13.38	10.89	13.06	8.24	7.17	8.85	7.87
SCARB1	SYT7	251	462	595	388	654	0.142	9.33	4.41	11.30	13.38	14.14	13.06	9.99	7.17	9.60	7.87
LDHB	SYTL2	877	818	690	28	194	0.190	12.28	9.20	14.91	12.47	9.67	8.70	13.24	10.12	12.69	8.62
SLCO3A1	SYTL2	20	550	896	448	565	0.735	12.09	9.20	9.80	12.47	8.14	8.70	10.73	10.12	9.05	8.62
GLIPR2	SYTL3	44	624	644	357	541	0.205	13.44	12.03	8.00	4.23	7.51	6.70	11.39	9.43	8.06	9.14
ACSL5	TAB2	715	726	838	709	363	0.351	10.94	11.84	8.33	11.09	12.76	11.50	11.40	11.77	8.25	12.51
SLC31A1	TAB2	842	846	933	629	832	0.291	10.94	11.84	9.00	11.09	12.59	11.50	10.40	11.77	8.83	12.51
CHDH	TACO1	373	77	789	698	643	0.407	6.05	9.13	10.17	9.08	12.42	11.28	7.98	7.76	9.09	10.54
ANK3	TAGLN	441	145	936	113	132	0.872	7.81	10.83	12.43	10.12	9.32	11.73	9.27	14.61	11.64	11.68
HK1	TAGLN	416	142	923	599	26	0.796	12.83	10.83	13.57	10.12	9.23	11.73	12.57	14.61	13.74	11.68
PAM	TAGLN	510	165	938	702	373	0.770	10.75	10.83	11.67	10.12	9.43	11.73	12.84	14.61	12.91	11.68
PFKM	TAGLN	605	158	822	447	306	0.592	9.45	10.83	13.10	10.12	8.86	11.73	10.81	14.61	15.56	11.68
QSOX1	TAGLN	458	294	903	518	22	0.797	13.12	10.83	11.05	10.12	11.91	11.73	14.38	14.61	12.07	11.68
SLCO3A1	TAGLN	614	391	915	605	498	0.721	12.09	10.83	9.80	10.12	8.14	11.73	10.73	14.61	9.05	11.68
CSNK2A1	TAGLN2	492	259	964	951	413	0.703	10.82	15.91	11.17	10.67	10.90	12.79	11.04	15.56	12.32	11.28
DNM1L	TAGLN2	240	30	986	952	735	0.628	10.21	15.91	12.33	10.67	10.10	12.79	11.16	15.56	11.68	11.28
KPNA4	TAGLN2	611	337	984	945	93	0.690	11.84	15.91	11.25	10.67	11.24	12.79	11.45	15.56	13.58	11.28
MRPS23	TAGLN2	640	92	981	606	280	0.839	8.91	15.91	9.53	10.67	9.39	12.79	9.02	15.56	10.55	11.28
PSMC4	TAGLN2	662	394	994	893	245	0.711	11.32	15.91	10.79	10.67	11.43	12.79	10.87	15.56	11.90	11.28
RAN	TAGLN2	323	155	988	881	703	0.684	11.59	15.91	12.57	10.67	12.05	12.79	12.59	15.56	12.74	11.28
TAF9	TAGLN2	272	179	957	894	691	0.622	9.92	15.91	11.13	10.67	10.95	12.79	10.37	15.56	11.26	11.28
CLU	TANGO6	240	151	941	623	114	0.821	12.76	9.41	18.59	8.37	16.43	10.02	14.68	8.50	10.77	9.96
COQ10A	TANGO6	970	910	684	867	4	0.092	8.44	9.41	8.75	8.37	9.96	10.02	7.45	8.50	11.56	9.96
GCAT	TANGO6	272	854	806	880	28	0.306	7.68	9.41	9.53	8.37	10.69	10.02	7.04	8.50	9.20	9.96
GNAO1	TANGO6	795	971	910	481	19	0.468	7.82	9.41	14.47	8.37	11.06	10.02	6.02	8.50	7.57	9.96
LYRM5	TANGO6	639	762	975	883	647	0.484	8.66	9.41	9.27	8.37	10.17	10.02	7.94	8.50	10.39	9.96
NHSL1	TANGO6	641	44	861	758	155	0.522	6.58	9.41	8.82	8.37	11.21	10.02	9.67	8.50	6.75	9.96
ARL4C	TAP1	64	49	879	767	570	0.590	12.00	12.93	10.94	8.91	8.86	10.06	10.55	11.94	7.25	9.93
CELF2	TAP1	957	62	841	405	665	0.429	13.59	12.93	12.90	8.91	8.49	10.06	12.77	11.94	11.43	9.93
SNN	TAP1	875	172	862	859	692	0.268	12.67	12.93	13.87	8.91	8.54	10.06	10.71	11.94	12.85	9.93
HSD17B8	TAPT1	446	376	752	875	178	0.378	8.30	10.15	6.81	10.56	10.24	11.27	7.53	10.20	8.88	11.58
NEU4	TAPT1	192	329	803	164	194	0.606	4.35	10.15	8.37	10.56	11.68	11.27	3.22	10.20	6.79	11.58
RXRA	TAPT1	567	684	238	939	703	0.000	13.70	10.15	11.98	10.56	14.06	11.27	12.01	10.20	13.83	11.58
GPR107	TBC1D16	931	770	971	912	898	0.186	11.53	8.53	11.86	11.40	11.22	10.33	12.03	10.87	11.53	9.80
QARS	TBC1D16	655	739	903	939	678	0.319	12.20	8.53	10.99	11.40	12.08	10.33	12.26	10.87	12.77	9.80
DFFA	TBC1D9B	998	824	992	998	887	0.137	9.66	11.83	10.14	13.34	10.10	12.72	9.70	12.54	10.27	12.30
KIF3B	TBC1D9B	969	875	985	994	968	0.071	9.67	11.83	12.32	13.34	11.30	12.72	10.88	12.54	9.30	12.30
CYSTM1	TBCB	736	623	988	769	601	0.612	13.01	11.51	10.56	12.07	10.17	10.03	11.46	10.57	12.44	10.38
AGPAT3	TBL1X	667	453	967	857	503	0.670	11.40	11.93	12.76	10.17	12.71	11.16	11.53	9.77	12.78	9.85
KLHDC10	TBL1X	958	186	848	764	791	0.244	10.32	11.93	10.95	10.17	11.45	11.16	10.75	9.77	11.53	9.85
KLHDC3	TBL1X	866	19	976	791	13	0.624	11.43	11.93	13.83	10.17	11.79	11.16	11.23	9.77	12.47	9.85
MTFR1L	TBL1X	803	232	530	824	163	0.030	10.55	11.93	11.68	10.17	11.89	11.16	10.51	9.77	12.28	9.85
BTD	TCEA2	836	698	585	735	688	0.000	9.28	9.72	7.18	12.23	10.43	10.74	8.15	9.75	8.63	10.13
PAM	TCF4	771	912	995	644	780	0.436	10.75	8.81	11.67	12.13	9.43	9.02	12.84	12.57	12.91	11.15
PFKP	TCF4	682	689	768	315	330	0.350	10.85	8.81	13.22	12.13	7.82	9.02	10.46	12.57	11.33	11.15
PTGDS	TCF4	228	108	768	673	650	0.374	10.48	8.81	15.98	12.13	9.68	9.02	13.35	12.57	10.22	11.15
SLC6A6	TCF4	574	639	922	611	220	0.682	14.10	8.81	10.22	12.13	8.34	9.02	12.50	12.57	11.97	11.15
LCMT1	TCIRG1	802	63	947	464	885	0.550	9.89	15.20	10.61	8.63	8.40	12.37	8.86	13.64	10.57	9.82
RMND1	TCTA	722	854	926	989	899	0.151	8.55	11.02	8.98	11.01	9.91	11.02	8.11	10.18	8.97	9.87
CASC10	TEF	101	415	852	665	256	0.622	2.58	7.99	8.36	12.90	8.98	10.72	4.65	9.90	4.14	11.42
CISD3	TEF	857	694	565	566	457	0.033	9.61	7.99	9.44	12.90	11.98	10.72	8.97	9.90	9.98	11.42
GJB1	TEF	101	27	877	577	47	0.716	3.11	7.99	7.86	12.90	13.76	10.72	2.71	9.90	1.73	11.42
GPER1	TEF	115	117	921	706	716	0.631	8.66	7.99	9.21	12.90	10.27	10.72	8.09	9.90	7.12	11.42
HNF1A	TEF	732	914	873	638	281	0.374	5.33	7.99	5.92	12.90	11.10	10.72	3.12	9.90	4.51	11.42
NEU4	TEF	276	144	901	30	50	0.802	4.35	7.99	8.37	12.90	11.68	10.72	3.22	9.90	6.79	11.42
PAOX	TEF	942	475	822	814	809	0.172	8.04	7.99	6.95	12.90	9.33	10.72	6.35	9.90	7.84	11.42
SFXN5	TEF	409	160	946	613	716	0.728	11.06	7.99	13.53	12.90	12.51	10.72	8.90	9.90	9.71	11.42
SLC46A1	TEF	820	454	904	727	590	0.489	6.81	7.99	7.67	12.90	10.29	10.72	7.07	9.90	6.93	11.42
TBL1X	TEF	511	67	661	467	235	0.317	11.93	7.99	10.17	12.90	11.16	10.72	9.77	9.90	9.85	11.42
ARHGEF18	TESC	55	677	902	248	681	0.625	12.04	11.80	11.03	9.37	10.60	6.57	11.09	7.40	9.41	7.32
[truncated: 441 more rows]
