# Supplementary material for: Differential coexpression in human tissues and the confounding effect of mean expression levels
Source: Bioinformatics. 2018 Jul 3;35(1):55–61. doi: 10.1093/bioinformatics/bty538 (PMC6298061; doi:10.1093/bioinformatics/bty538)
Supplement: Supplementary Data [file bty538_suppl_data.zip › TSlinksTSS_lung_pureLinks_GTEx_exp.csv]

gene_A	gene_B	blood_corr	brain_cortex_corr	liver_corr	lung_corr	skeletalMuscle_corr	GTExTSS	gA_bloodExp	gB_bloodExp	gA_brainExp	gB_brainExp	gA_liverExp	gB_liverExp	gA_lungExp	gB_lungExp	gA_muscleExp	gB_muscleExp
ABCC3	ACAA1	528	601	366	839	353	0.614	10.18	12.55	5.37	10.95	14.13	14.06	11.09	10.97	5.97	10.62
ACAP1	ACP2	679	69	89	242	788	0.000	13.89	10.17	5.01	10.30	8.36	12.20	10.03	10.28	7.66	9.52
ACSL5	AGPAT2	193	314	666	898	665	0.630	10.94	11.77	8.33	8.54	12.76	13.80	11.40	11.21	8.25	10.14
ACOT7	AGPS	313	676	878	970	822	0.502	8.95	10.06	12.56	9.51	9.34	10.68	9.09	10.00	7.77	10.66
ABCA3	AHCYL2	872	327	875	992	598	0.561	8.87	9.44	12.96	12.04	7.45	9.53	13.89	11.27	10.00	11.67
ACAP1	AIF1	738	337	311	356	640	0.000	13.89	12.41	5.01	6.11	8.36	7.75	10.03	10.00	7.66	6.51
ACSL5	AK1	600	335	622	650	437	0.189	10.94	10.63	8.33	11.71	12.76	10.92	11.40	11.47	8.25	13.90
ACSS2	AK1	11	631	33	819	677	0.484	11.19	10.63	10.40	11.71	12.50	10.92	12.02	11.47	12.83	13.90
AGPAT2	AK1	3	874	744	912	261	0.515	11.77	10.63	8.54	11.71	13.80	10.92	11.21	11.47	10.14	13.90
ABCA3	AKAP13	455	761	885	839	764	0.246	8.87	12.96	12.96	10.43	7.45	12.05	13.89	14.07	10.00	13.05
ACSL5	AKAP13	643	472	680	900	648	0.565	10.94	12.96	8.33	10.43	12.76	12.05	11.40	14.07	8.25	13.05
AK1	AKAP13	23	609	955	747	187	0.316	10.63	12.96	11.71	10.43	10.92	12.05	11.47	14.07	13.90	13.05
ABHD14B	ALDH3B1	142	653	565	964	948	0.595	11.14	11.94	8.89	5.99	12.70	7.87	10.67	11.59	9.88	7.26
ABI2	ALS2	709	818	963	858	938	0.095	9.03	9.10	12.97	11.07	10.20	11.10	11.15	10.17	10.01	11.04
ACP2	AMPD3	577	499	652	643	311	0.176	10.17	11.34	10.30	9.32	12.20	7.03	10.28	9.17	9.52	12.10
ADCK1	ANGEL1	910	970	737	683	855	0.000	8.88	9.41	8.90	10.58	8.96	10.61	7.68	10.29	9.31	10.05
ACTA2	ANKH	66	147	174	617	721	0.175	9.32	10.99	8.68	12.55	11.01	11.70	14.17	10.76	11.33	12.06
AEBP1	ANXA6	796	33	358	626	624	0.127	9.24	13.34	11.07	13.41	11.28	13.42	14.79	13.49	10.88	13.33
AGGF1	AP3B1	999	491	1000	1000	995	0.253	9.68	11.06	10.40	9.39	9.83	9.63	9.49	10.43	10.24	10.25
AK1	APLP2	19	804	701	902	475	0.551	10.63	14.29	11.71	14.14	10.92	14.20	11.47	15.53	13.90	12.35
AIF1	APOE	5	115	262	542	681	0.063	12.41	8.26	6.11	14.36	7.75	16.57	10.00	12.62	6.51	8.73
AMPD3	APOL1	431	270	685	639	105	0.208	11.34	10.45	9.32	7.39	7.03	12.97	9.17	12.13	12.10	8.98
ABCA1	ARHGAP25	695	390	309	511	502	0.015	10.93	13.28	8.82	6.44	12.91	8.31	11.78	10.21	11.20	7.50
ACP2	ARHGAP25	519	651	471	672	721	0.173	10.17	13.28	10.30	6.44	12.20	8.31	10.28	10.21	9.52	7.50
APOE	ARHGAP30	3	171	280	571	727	0.106	8.26	14.26	14.36	5.78	16.57	8.61	12.62	11.40	8.73	7.30
ACP2	ARHGDIB	457	242	747	961	878	0.610	10.17	16.50	10.30	8.63	12.20	10.52	10.28	13.01	9.52	10.22
AK1	ARHGEF2	34	577	870	902	659	0.501	10.63	13.10	11.71	12.37	10.92	9.42	11.47	13.07	13.90	10.25
ALDH2	ARHGEF2	818	11	51	837	515	0.507	12.31	13.10	14.12	12.37	15.62	9.42	13.79	13.07	13.17	10.25
AFF1	ARHGEF3	889	269	612	851	606	0.417	11.60	10.98	10.22	10.85	11.86	7.58	12.67	10.63	13.42	9.47
ADAM19	ARHGEF6	859	29	146	467	878	0.000	12.45	11.94	8.38	10.49	9.65	8.77	10.55	11.28	8.32	11.80
ALDH2	ARL6IP5	702	227	718	946	640	0.612	12.31	12.49	14.12	12.08	15.62	10.83	13.79	12.39	13.17	12.76
AAMDC	ARRB1	717	334	593	820	260	0.485	6.76	11.24	5.29	11.27	7.27	8.65	6.99	11.25	9.70	8.61
AK1	ARSD	4	663	110	879	311	0.676	10.63	10.03	11.71	7.62	10.92	11.49	11.47	9.70	13.90	7.24
ABHD14A	ASAH1	104	693	439	861	669	0.541	8.84	13.59	10.56	11.48	8.95	11.36	7.80	13.46	9.20	11.86
ALDH6A1	ASAH1	362	557	122	951	718	0.764	8.42	13.59	12.86	11.48	13.70	11.36	9.40	13.46	10.84	11.86
ABI3	ATG7	85	123	981	855	718	0.423	11.43	11.17	5.16	9.64	7.26	8.51	9.24	9.40	6.96	9.34
APOE	ATG7	17	117	503	535	601	0.051	8.26	11.17	14.36	9.64	16.57	8.51	12.62	9.40	8.73	9.34
ABCA3	ATP11A	113	505	897	971	855	0.564	8.87	11.64	12.96	10.03	7.45	10.95	13.89	12.72	10.00	10.74
ARHGAP19	ATP5A1	752	153	764	921	373	0.584	10.89	12.98	8.16	14.59	8.69	14.03	9.13	13.65	8.36	15.13
ABHD14B	ATP6V0A1	513	325	472	886	680	0.675	11.14	11.61	8.89	13.73	12.70	11.24	10.67	11.48	9.88	12.41
APOE	ATP6V1B2	3	17	483	429	274	0.000	8.26	13.91	14.36	13.89	16.57	11.51	12.62	12.98	8.73	12.08
ARHGAP17	ATP6V1B2	411	177	919	815	953	0.315	10.30	13.91	8.56	13.89	9.51	11.51	10.59	12.98	10.67	12.08
APOE	ATP6V1F	237	264	436	812	655	0.546	8.26	11.65	14.36	12.12	16.57	10.01	12.62	11.09	8.73	11.04
ARHGEF40	ATP8B2	39	285	394	923	739	0.727	12.31	10.92	10.53	10.81	12.32	8.87	11.68	11.69	10.77	9.04
ASAH1	ATP9B	525	857	928	919	108	0.438	13.59	9.98	11.48	9.79	11.36	9.31	13.46	9.62	11.86	10.16
AGO4	ATPAF1	873	836	831	868	576	0.180	12.14	9.86	10.09	12.33	10.37	11.43	11.34	9.78	11.09	12.53
ARRB1	ATXN2	696	732	422	473	627	0.000	11.24	10.42	11.27	11.43	8.65	11.08	11.25	11.13	8.61	11.00
ANXA6	AXL	614	29	772	579	546	0.056	13.34	6.61	13.41	10.44	13.42	8.53	13.49	11.57	13.33	10.02
ABHD16A	B3GALT4	996	947	755	952	489	0.327	12.08	10.45	10.78	6.91	11.23	5.94	10.70	7.94	10.93	6.97
ATF6	B4GALT3	37	886	904	879	956	0.190	12.13	11.38	9.93	10.10	11.16	10.27	11.34	10.70	10.69	10.29
ATP11B	B4GALT4	953	888	954	915	974	0.013	12.57	10.28	8.88	8.55	10.25	9.91	11.22	9.59	10.45	8.86
AK1	BAIAP2-AS1	7	636	754	972	490	0.749	10.63	9.19	11.71	11.71	10.92	9.16	11.47	9.67	13.90	6.66
ARHGAP12	BAIAP2-AS1	407	522	764	660	860	0.149	9.06	9.19	10.15	11.71	10.58	9.16	10.53	9.67	10.20	6.66
ANGPTL4	BATF3	510	180	624	736	328	0.405	6.89	7.10	9.56	6.62	12.55	5.49	9.98	7.22	9.43	5.38
ALDH3B1	BBS1	800	153	892	958	969	0.341	11.94	9.01	5.99	11.36	7.87	9.45	11.59	9.96	7.26	9.67
ABHD11	BCL7B	965	814	900	881	150	0.224	9.61	10.91	9.45	11.19	9.30	10.76	8.99	10.88	8.70	11.75
AMOTL1	BICD2	253	888	678	955	939	0.407	7.62	11.56	9.61	10.60	10.59	10.01	11.84	11.23	14.12	11.16
ARHGAP23	BICD2	7	492	810	836	850	0.349	7.30	11.56	12.62	10.60	8.12	10.01	11.73	11.23	10.20	11.16
ACTN1	BMP1	152	338	8	121	763	0.000	14.08	8.85	12.23	9.37	12.55	11.78	13.65	11.50	10.75	10.18
ADAM19	BMP1	61	599	8	30	25	0.000	12.45	8.85	8.38	9.37	9.65	11.78	10.55	11.50	8.32	10.18
AEBP1	BMP1	841	345	367	213	714	0.000	9.24	8.85	11.07	9.37	11.28	11.78	14.79	11.50	10.88	10.18
ABCE1	BOP1	755	697	994	975	971	0.251	9.41	8.23	9.86	6.79	10.65	6.88	10.36	6.09	11.08	9.38
AKT1	BRF1	884	947	920	947	965	0.045	12.46	10.58	12.17	11.45	13.07	10.62	13.03	10.31	11.93	10.60
ATP5H	BRMS1	976	695	972	1000	405	0.428	10.99	11.48	11.77	8.91	11.93	9.86	11.03	9.85	12.93	10.16
BTBD6	BTBD7	515	404	751	968	386	0.803	10.70	9.73	11.87	9.15	10.88	9.96	10.73	10.24	11.93	10.49
ABCC3	BTBD9	475	471	774	542	227	0.063	10.18	10.00	5.37	11.61	14.13	8.51	11.09	9.93	5.97	9.62
ACSL5	BTBD9	794	31	812	923	509	0.538	10.94	10.00	8.33	11.61	12.76	8.51	11.40	9.93	8.25	9.62
AK1	BTBD9	50	665	872	870	731	0.357	10.63	10.00	11.71	11.61	10.92	8.51	11.47	9.93	13.90	9.62
APOE	BTN2A2	399	282	665	255	869	0.000	8.26	9.71	14.36	6.53	16.57	8.15	12.62	9.79	8.73	7.49
ANXA6	BTN3A1	799	74	364	624	939	0.124	13.34	12.26	13.41	8.62	13.42	10.33	13.49	11.45	13.33	8.58
AAGAB	BYSL	843	989	989	974	920	0.092	10.37	8.50	10.56	7.59	9.88	8.72	10.01	7.87	10.92	10.13
ATP13A3	BYSL	276	786	888	519	988	0.009	11.09	8.50	10.35	7.59	12.83	8.72	12.31	7.87	11.02	10.13
B3GALNT2	BYSL	572	911	951	346	55	0.000	6.90	8.50	6.52	7.59	7.33	8.72	7.33	7.87	10.19	10.13
ANXA11	C10orf76	572	941	944	998	396	0.517	14.17	10.60	12.34	10.11	11.72	10.32	13.42	10.24	13.41	10.91
ACTA2	C16orf45	470	217	187	508	33	0.016	9.32	8.03	8.68	13.31	11.01	9.72	14.17	9.12	11.33	11.79
AXIN1	C16orf91	891	842	951	919	844	0.090	11.69	8.17	9.83	8.01	9.84	8.25	10.35	6.84	10.67	8.78
C14orf28	C17orf103	515	582	403	735	379	0.421	7.24	12.61	6.57	8.88	8.27	9.04	7.02	9.70	7.42	11.60
BYSL	C17orf96	845	898	875	529	745	0.000	8.50	6.39	7.59	10.04	8.72	7.97	7.87	5.80	10.13	5.66
ABCA3	C19orf59	5	101	813	667	210	0.251	8.87	13.16	12.96	2.26	7.45	4.81	13.89	10.23	10.00	3.80
ARHGEF6	C19orf66	629	510	632	903	460	0.670	11.94	10.74	10.49	10.46	8.77	12.95	11.28	10.18	11.80	7.86
ACAP1	C1QA	199	409	76	26	530	0.000	13.89	10.63	5.01	7.16	8.36	9.61	10.03	12.90	7.66	8.16
APOE	C1orf162	18	138	233	629	261	0.258	8.26	13.64	14.36	7.02	16.57	8.88	12.62	10.81	8.73	8.91
ACTR3B	C1orf35	753	517	726	858	853	0.291	8.08	9.49	10.67	9.50	8.74	9.21	7.19	8.68	9.22	8.93
AGO1	C1orf50	864	895	818	834	980	0.008	11.49	8.78	11.13	7.77	10.11	8.62	10.81	6.87	10.50	8.62
ACAP1	C1orf54	419	571	632	492	832	0.000	13.89	6.17	5.01	6.78	8.36	6.32	10.03	7.28	7.66	7.21
ADAM19	C1orf54	171	21	60	630	725	0.195	12.45	6.17	8.38	6.78	9.65	6.32	10.55	7.28	8.32	7.21
ABCA3	C2	494	692	904	1000	488	0.702	8.87	8.88	12.96	6.16	7.45	14.70	13.89	11.67	10.00	7.04
ASAH1	C2	184	684	935	994	331	0.678	13.59	8.88	11.48	6.16	11.36	14.70	13.46	11.67	11.86	7.04
ABCC1	C3orf58	506	863	430	773	276	0.406	10.87	9.34	8.72	9.11	8.42	9.72	11.69	9.02	11.54	8.41
ARHGAP24	C4orf3	963	794	906	898	875	0.064	10.10	12.76	9.37	12.48	8.04	12.31	9.50	12.39	8.45	11.51
ABHD16A	C6orf47	999	933	992	986	808	0.116	12.08	10.55	10.78	7.70	11.23	8.58	10.70	8.78	10.93	9.57
ARSD	C6orf89	1000	480	628	986	847	0.491	10.03	11.83	7.62	12.21	11.49	11.94	9.70	12.07	7.24	12.15
BUD31	C7orf43	946	781	782	812	960	0.030	10.28	11.76	9.42	10.01	9.04	9.98	9.20	9.67	8.98	8.67
BAG1	C9orf156	18	807	936	740	748	0.120	12.43	9.95	11.10	7.30	10.95	8.86	11.37	8.04	12.53	8.51
ACAT1	CABLES1	414	560	243	931	214	0.832	9.64	6.43	10.70	11.89	14.36	9.34	10.77	9.38	13.55	7.16
ADCK3	CABLES1	212	7	545	970	382	0.917	11.12	6.43	10.84	11.89	12.86	9.34	10.46	9.38	15.54	7.16
AK1	CABLES1	696	484	31	982	457	0.866	10.63	6.43	11.71	11.89	10.92	9.34	11.47	9.38	13.90	7.16
BTBD9	CACFD1	904	330	712	966	861	0.444	10.00	8.73	11.61	9.08	8.51	11.92	9.93	9.64	9.62	9.21
AK1	CACNA2D2	920	554	471	844	681	0.399	10.63	8.53	11.71	9.49	10.92	5.92	11.47	11.55	13.90	7.82
ALDH3A2	CACNA2D2	227	590	251	698	304	0.351	10.03	8.53	10.92	9.49	13.35	5.92	12.04	11.55	11.88	7.82
ASAH1	CACNA2D2	12	600	200	984	546	0.895	13.59	8.53	11.48	9.49	11.36	5.92	13.46	11.55	11.86	7.82
ATP11A	CACNA2D2	29	408	274	983	533	0.950	11.64	8.53	10.03	9.49	10.95	5.92	12.72	11.55	10.74	7.82
BTG2	CACNA2D2	213	232	685	405	122	0.000	12.52	8.53	10.85	9.49	9.57	5.92	13.09	11.55	13.09	7.82
AGBL5	CACYBP	712	803	839	752	666	0.063	9.48	10.81	9.46	12.08	8.76	10.27	9.00	10.15	9.01	10.95
ABCA3	CADM1	818	420	528	582	150	0.109	8.87	6.96	12.96	11.53	7.45	10.54	13.89	11.34	10.00	8.66
ATP11A	CADM1	36	540	530	925	596	0.767	11.64	6.96	10.03	11.53	10.95	10.54	12.72	11.34	10.74	8.66
BAIAP2-AS1	CADM1	19	127	741	874	114	0.627	9.19	6.96	11.71	11.53	9.16	10.54	9.67	11.34	6.66	8.66
ACTN1	CALU	404	858	998	904	471	0.427	14.08	10.20	12.23	10.37	12.55	11.56	13.65	12.92	10.75	11.96
AK1	CAPN3	283	263	14	917	681	0.744	10.63	10.90	11.71	10.87	10.92	11.03	11.47	10.84	13.90	14.61
APOE	CAPZB	30	217	618	437	511	0.000	8.26	14.05	14.36	12.54	16.57	12.11	12.62	13.28	8.73	13.26
ARF5	CASP2	959	529	903	982	893	0.322	12.12	11.27	12.01	8.55	11.41	9.30	11.15	10.27	11.21	8.89
C7orf73	CASP2	302	666	901	969	576	0.617	11.44	11.27	9.33	8.55	10.50	9.30	9.70	10.27	10.98	8.89
ARHGEF2	CAT	833	41	7	649	635	0.156	13.10	13.04	12.37	10.23	9.42	14.24	13.07	12.43	10.25	12.34
AXIN2	CAT	406	572	213	881	669	0.641	7.64	13.04	9.71	10.23	7.90	14.24	10.84	12.43	10.27	12.34
BBS1	CAT	690	376	250	923	968	0.539	9.01	13.04	11.36	10.23	9.45	14.24	9.96	12.43	9.67	12.34
ARHGAP24	CBX7	799	832	387	891	522	0.456	10.10	11.78	9.37	13.75	8.04	10.79	9.50	11.81	8.45	12.54
BTG2	CBX7	949	123	283	753	343	0.380	12.52	11.78	10.85	13.75	9.57	10.79	13.09	11.81	13.09	12.54
C10orf54	CBX7	868	14	598	710	532	0.250	16.77	11.78	10.76	13.75	9.18	10.79	12.82	11.81	10.07	12.54
C1orf186	CBX7	614	236	249	677	206	0.297	6.06	11.78	1.12	13.75	5.48	10.79	5.60	11.81	3.89	12.54
CALCOCO2	CBX7	766	136	860	925	846	0.364	12.24	11.78	10.94	13.75	12.12	10.79	12.92	11.81	12.94	12.54
BIN3	CCAR2	691	990	993	988	999	0.148	10.59	11.38	7.32	11.85	8.00	10.98	8.08	11.46	8.50	11.62
BIN3	CCDC25	610	889	874	833	829	0.114	10.59	9.14	7.32	10.96	8.00	10.65	8.08	9.49	8.50	11.02
AFF1	CCNG2	968	579	712	913	688	0.380	11.60	11.05	10.22	10.67	11.86	8.55	12.67	10.38	13.42	9.66
ACP2	CD180	869	24	773	906	355	0.491	10.17	9.57	10.30	2.72	12.20	5.00	10.28	5.77	9.52	3.21
ADAM19	CD180	512	94	380	19	92	0.000	12.45	9.57	8.38	2.72	9.65	5.00	10.55	5.77	8.32	3.21
AMPD2	CD248	377	56	453	522	279	0.044	12.96	7.61	12.36	6.40	11.59	7.42	11.04	10.89	8.62	9.61
ANXA6	CD248	609	19	525	734	676	0.313	13.34	7.61	13.41	6.40	13.42	7.42	13.49	10.89	13.33	9.61
C11orf24	CD248	699	157	363	834	781	0.428	9.69	7.61	9.16	6.40	12.07	7.42	10.17	10.89	9.27	9.61
C1QTNF3	CD248	642	232	388	447	612	0.000	7.05	7.61	7.57	6.40	8.32	7.42	7.28	10.89	6.67	9.61
APOE	CD40	415	403	855	199	379	0.000	8.26	9.40	14.36	6.30	16.57	9.22	12.62	10.51	8.73	8.76
ALDH6A1	CD46	468	301	306	559	150	0.118	8.42	12.63	12.86	11.58	13.70	13.17	9.40	14.08	10.84	12.01
CAPN3	CD47	636	282	68	828	723	0.476	10.90	11.79	10.87	12.20	11.03	10.56	10.84	12.96	14.61	10.21
ACAP1	CD53	897	206	671	574	601	0.037	13.89	15.30	5.01	8.05	8.36	8.96	10.03	12.14	7.66	7.24
APOE	CD53	8	122	285	600	444	0.200	8.26	15.30	14.36	8.05	16.57	8.96	12.62	12.14	8.73	7.24
CD22	CD53	243	36	692	587	654	0.087	10.95	15.30	9.84	8.05	6.06	8.96	8.08	12.14	4.59	7.24
AHCYL2	CD55	464	259	421	873	95	0.746	9.44	14.40	12.04	8.51	9.53	9.66	11.27	13.73	11.67	12.15
AK1	CD55	4	454	903	765	25	0.398	10.63	14.40	11.71	8.51	10.92	9.66	11.47	13.73	13.90	12.15
ALDH3B1	CD55	815	454	461	804	286	0.456	11.94	14.40	5.99	8.51	7.87	9.66	11.59	13.73	7.26	12.15
CACNA2D2	CD55	15	426	183	814	31	0.628	8.53	14.40	9.49	8.51	5.92	9.66	11.55	13.73	7.82	12.15
AOAH	CD6	423	139	971	733	756	0.233	12.91	11.48	4.85	5.64	7.34	6.39	8.81	8.00	4.97	4.34
APOE	CD6	493	124	597	286	769	0.000	8.26	11.48	14.36	5.64	16.57	6.39	12.62	8.00	8.73	4.34
ARHGAP25	CD6	119	393	876	613	735	0.113	13.28	11.48	6.44	5.64	8.31	6.39	10.21	8.00	7.50	4.34
C1QA	CD6	207	12	474	65	464	0.000	10.63	11.48	7.16	5.64	9.61	6.39	12.90	8.00	8.16	4.34
ABCA3	CD63	66	419	968	819	913	0.319	8.87	14.13	12.96	12.63	7.45	13.12	13.89	14.90	10.00	13.84
ABCC3	CD63	390	464	723	608	834	0.108	10.18	14.13	5.37	12.63	14.13	13.12	11.09	14.90	5.97	13.84
ACP2	CD63	610	317	906	934	848	0.436	10.17	14.13	10.30	12.63	12.20	13.12	10.28	14.90	9.52	13.84
BTD	CD63	571	691	632	774	559	0.322	9.28	14.13	7.18	12.63	10.43	13.12	8.15	14.90	8.63	13.84
CD4	CD63	46	744	66	643	518	0.205	12.14	14.13	8.27	12.63	11.68	13.12	12.30	14.90	7.15	13.84
CD6	CD74	971	4	957	735	725	0.122	11.48	16.09	5.64	11.52	6.39	13.32	8.00	16.98	4.34	12.63
CD59	CD82	985	565	934	742	441	0.209	12.06	12.67	13.27	9.13	12.66	10.39	15.08	12.09	13.88	9.66
APOE	CD83	815	125	583	162	597	0.000	8.26	9.32	14.36	9.58	16.57	6.71	12.62	10.07	8.73	6.43
ACBD3	CDC42BPA	619	839	861	936	936	0.244	9.93	7.41	9.28	12.22	10.48	11.15	10.61	11.51	10.66	11.07
ACOT7	CDCA4	802	454	774	955	885	0.429	8.95	8.56	12.56	4.77	9.34	6.78	9.09	6.79	7.77	6.31
ACP1	CDCA4	948	609	910	935	792	0.247	10.60	8.56	11.17	4.77	11.47	6.78	10.94	6.79	11.32	6.31
AIMP2	CDCA4	719	568	745	940	469	0.614	8.43	8.56	6.79	4.77	8.54	6.78	7.07	6.79	10.85	6.31
APEX2	CDCA4	921	833	921	1000	730	0.297	10.16	8.56	8.07	4.77	9.64	6.78	9.13	6.79	9.24	6.31
APOO	CDCA4	671	601	884	957	342	0.586	8.02	8.56	9.77	4.77	8.10	6.78	6.73	6.79	9.50	6.31
APTX	CDCA4	928	822	796	979	824	0.273	9.44	8.56	9.32	4.77	10.11	6.78	9.26	6.79	9.31	6.31
ARL6IP6	CDCA4	565	674	862	955	902	0.408	9.89	8.56	8.03	4.77	8.05	6.78	8.71	6.79	8.59	6.31
BANF1	CDCA4	861	750	915	953	698	0.294	11.04	8.56	11.02	4.77	11.36	6.78	10.78	6.79	12.30	6.31
BOP1	CDCA4	908	569	739	844	555	0.335	8.23	8.56	6.79	4.77	6.88	6.78	6.09	6.79	9.38	6.31
C14orf2	CDCA4	502	546	881	982	703	0.648	10.51	8.56	12.11	4.77	11.13	6.78	10.10	6.79	11.87	6.31
CCDC51	CDCA4	869	716	895	977	715	0.356	8.16	8.56	7.75	4.77	8.66	6.78	7.26	6.79	8.52	6.31
CCT7	CDCA4	917	675	844	968	831	0.302	11.96	8.56	12.27	4.77	11.95	6.78	12.36	6.79	13.25	6.31
CAT	CELF2	829	97	138	865	842	0.395	13.04	13.59	10.23	12.90	14.24	8.49	12.43	12.77	12.34	11.43
ATPIF1	CEP104	928	722	501	887	196	0.469	10.91	9.96	11.98	9.84	12.11	10.36	10.56	9.83	11.77	10.51
CAMTA1	CEP104	948	725	940	673	683	0.000	9.34	9.96	12.02	9.84	9.92	10.36	9.84	9.83	10.44	10.51
APOL3	CEP120	710	215	778	464	840	0.000	10.97	9.72	7.91	8.43	10.83	9.13	11.90	9.46	10.24	9.21
AK1	CERS2	24	537	822	869	225	0.558	10.63	11.73	11.71	10.11	10.92	13.35	11.47	12.00	13.90	9.89
ARHGAP26	CFB	57	43	244	294	244	0.000	13.29	6.78	11.84	7.18	9.41	16.43	11.19	11.30	10.63	7.74
ARHGEF3	CFLAR	330	37	779	769	355	0.404	10.98	14.14	10.85	10.79	7.58	12.55	10.63	14.34	9.47	13.98
CBX1	CHAF1A	559	792	901	801	690	0.181	10.67	9.43	11.86	8.20	9.59	7.93	10.41	7.87	11.20	9.76
CCT6A	CHAF1A	887	844	861	835	901	0.000	11.14	9.43	11.85	8.20	11.72	7.93	12.04	7.87	12.86	9.76
C16orf58	CHKA	143	683	719	973	847	0.572	10.36	10.04	11.02	11.02	11.83	10.86	10.83	9.74	9.43	8.96
CALU	CHPF2	654	733	999	833	842	0.140	10.20	11.52	10.37	9.71	11.56	10.40	12.92	10.72	11.96	9.41
BAIAP2-AS1	CIRBP	785	521	100	767	363	0.390	9.19	13.12	11.71	13.98	9.16	13.37	9.67	14.05	6.66	13.45
CISH	CITED2	412	51	188	334	22	0.000	10.79	11.30	4.33	9.80	11.06	12.33	10.54	12.67	10.12	11.30
AGBL5	CKS1B	801	773	907	816	835	0.029	9.48	7.72	9.46	5.80	8.76	8.94	9.00	7.23	9.01	7.10
CHAF1A	CKS1B	916	601	850	756	637	0.137	9.43	7.72	8.20	5.80	7.93	8.94	7.87	7.23	9.76	7.10
ABL2	CLCF1	632	323	828	936	848	0.468	9.79	8.21	10.05	3.87	9.41	6.65	10.59	8.04	9.82	6.31
ABL1	CLIP3	742	364	748	400	880	0.000	10.36	7.54	11.48	14.73	10.90	7.65	12.49	9.40	11.69	8.22
ARHGEF40	CLIP3	60	17	535	682	804	0.256	12.31	7.54	10.53	14.73	12.32	7.65	11.68	9.40	10.77	8.22
CALD1	CLIP3	555	76	931	835	998	0.307	8.47	7.54	11.26	14.73	13.72	7.65	14.58	9.40	12.01	8.22
ACCS	CLK4	128	524	745	864	784	0.452	9.31	10.49	6.80	10.50	10.74	10.48	9.71	10.21	8.36	11.09
AXIN2	CLU	53	595	49	452	82	0.000	7.64	12.76	9.71	18.59	7.90	16.43	10.84	14.68	10.27	10.77
BYSL	CMC2	815	973	568	685	504	0.149	8.50	8.88	7.59	10.09	8.72	9.61	7.87	8.51	10.13	9.74
CCNF	CMC2	877	871	760	606	572	0.017	8.36	8.88	7.84	10.09	6.71	9.61	6.33	8.51	7.60	9.74
CDCA4	CMSS1	933	601	852	718	585	0.125	8.56	7.99	4.77	9.33	6.78	8.30	6.79	8.27	6.31	10.24
ADAM19	CMTM3	912	38	482	757	613	0.329	12.45	11.85	8.38	6.96	9.65	8.18	10.55	10.90	8.32	8.39
AGPAT2	CNIH4	985	766	614	990	839	0.378	11.77	10.96	8.54	9.43	13.80	9.56	11.21	10.24	10.14	10.32
CACNA2D2	CNNM3	872	728	327	672	681	0.086	8.53	9.86	9.49	8.93	5.92	10.56	11.55	9.25	7.82	10.12
BIN3	CNOT7	784	827	987	873	540	0.234	10.59	10.63	7.32	10.47	8.00	10.57	8.08	10.28	8.50	11.47
BAZ2A	CNPY2	464	891	906	132	916	0.000	13.05	9.86	11.63	10.08	12.10	11.46	13.25	10.08	12.22	9.57
CCNF	COA4	687	393	888	808	721	0.258	8.36	9.64	7.84	8.75	6.71	10.99	6.33	9.25	7.60	10.38
C1orf35	COA6	654	722	534	745	785	0.163	9.49	8.37	9.50	8.80	9.21	8.48	8.68	6.97	8.93	10.03
ABT1	COA7	0	0	0	0	0	0.000	10.51	0.00	8.51	0.00	9.78	0.00	9.08	0.00	9.46	0.00
AURKAIP1	COA7	0	0	0	0	0	0.000	11.71	0.00	11.45	0.00	12.09	0.00	10.52	0.00	12.16	0.00
CLUH	COA7	0	0	0	0	0	0.000	10.59	0.00	11.89	0.00	14.13	0.00	11.53	0.00	13.62	0.00
AP1S1	COG5	621	739	871	721	842	0.050	9.29	10.20	11.58	9.51	10.01	9.09	8.75	9.95	8.04	10.26
CD4	COL1A1	390	419	181	772	835	0.408	12.14	8.40	8.27	6.87	11.68	11.90	12.30	14.71	7.15	10.66
CALU	COLGALT1	664	818	981	880	852	0.153	10.20	12.94	10.37	10.47	11.56	11.53	12.92	12.70	11.96	10.77
CCND2	COPZ2	879	25	490	601	679	0.101	11.18	7.28	11.92	6.55	7.97	9.66	11.63	8.42	8.32	10.75
CNPY4	COPZ2	590	580	603	891	743	0.524	9.29	7.28	7.89	6.55	7.65	9.66	7.95	8.42	7.29	10.75
C14orf79	COQ6	761	907	620	968	197	0.542	7.07	7.48	9.12	6.75	8.54	8.25	8.03	6.39	7.12	8.93
ACOT7	CORO1C	47	701	812	879	899	0.312	8.95	12.04	12.56	11.17	9.34	11.44	9.09	13.02	7.77	11.37
COLGALT1	CORO1C	961	921	941	804	966	0.000	12.94	12.04	10.47	11.17	11.53	11.44	12.70	13.02	10.77	11.37
C15orf39	COX5A	564	461	865	931	473	0.647	13.09	10.86	7.75	11.96	8.39	11.92	10.65	10.65	8.70	13.74
AK1	CPM	2	409	884	878	50	0.567	10.63	9.80	11.71	8.32	10.92	10.68	11.47	11.99	13.90	9.33
BTBD9	CPM	548	68	949	886	167	0.555	10.00	9.80	11.61	8.32	8.51	10.68	9.93	11.99	9.62	9.33
CD47	CPM	566	284	927	904	367	0.573	11.79	9.80	12.20	8.32	10.56	10.68	12.96	11.99	10.21	9.33
ARL2BP	CPNE2	710	251	774	985	949	0.503	10.08	10.87	10.36	10.45	9.69	8.80	10.37	11.17	10.05	9.66
ARL6IP6	CPSF3	931	384	564	939	552	0.605	9.89	10.18	8.03	8.89	8.05	9.52	8.71	9.11	8.59	9.79
CDCA4	CPSF3	788	716	912	980	743	0.381	8.56	10.18	4.77	8.89	6.78	9.52	6.79	9.11	6.31	9.79
BUD31	CPSF4	694	937	859	944	980	0.171	10.28	9.86	9.42	10.18	9.04	9.49	9.20	9.24	8.98	10.35
COA7	CPSF4	101	108	96	50	47	0.000	0.00	9.86	0.00	10.18	0.00	9.49	0.00	9.24	0.00	10.35
BET1L	CREB3L1	63	551	469	769	601	0.462	11.06	5.09	9.48	7.19	10.87	5.61	10.44	9.57	9.66	7.41
CD63	CREB3L1	301	341	854	911	446	0.645	14.13	5.09	12.63	7.19	13.12	5.61	14.90	9.57	13.84	7.41
CD81	CREB3L1	117	209	357	531	743	0.046	11.98	5.09	14.13	7.19	14.93	5.61	15.47	9.57	12.42	7.41
C1RL	CREBL2	130	572	985	878	759	0.402	12.07	10.34	7.72	11.30	13.63	11.21	11.51	10.87	9.57	9.68
BTN3A1	CREBRF	453	661	833	655	308	0.155	12.26	12.18	8.62	9.91	10.33	10.51	11.45	11.17	8.58	10.55
C19orf66	CREBRF	180	791	843	728	629	0.164	10.74	12.18	10.46	9.91	12.95	10.51	10.18	11.17	7.86	10.55
ALG12	CRELD2	947	950	982	961	981	0.013	9.57	10.11	7.47	9.30	9.35	11.55	8.47	10.15	8.66	9.29
ANXA6	CRISPLD2	30	36	375	329	114	0.000	13.34	12.06	13.41	7.70	13.42	9.54	13.49	13.48	13.33	10.43
ARID5A	CRISPLD2	573	958	402	613	369	0.133	13.47	12.06	9.57	7.70	10.93	9.54	11.97	13.48	10.62	10.43
CCDC152	CROCCP2	835	228	357	763	797	0.263	5.31	10.34	5.28	10.19	8.83	12.47	5.91	9.91	5.99	9.98
C1orf198	CRY2	703	222	164	860	14	0.619	8.35	10.52	11.86	12.46	10.07	12.61	12.70	11.41	12.61	12.79
ALDH2	CRYM	361	36	478	645	217	0.290	12.31	5.86	14.12	11.89	15.62	8.20	13.79	5.16	13.17	5.09
AQP3	CRYM	146	285	283	942	27	0.884	9.85	5.86	4.58	11.89	12.66	8.20	11.45	5.16	7.94	5.09
BOP1	CSE1L	828	877	985	934	923	0.087	8.23	10.35	6.79	10.96	6.88	10.78	6.09	10.85	9.38	11.76
CDCA4	CSE1L	955	710	940	971	702	0.288	8.56	10.35	4.77	10.96	6.78	10.78	6.79	10.85	6.31	11.76
APOE	CSF1R	564	123	228	689	801	0.252	8.26	12.11	14.36	9.05	16.57	8.78	12.62	11.19	8.73	8.26
BID	CSK	992	861	899	973	892	0.134	12.04	13.56	10.93	10.18	10.48	11.59	9.27	11.08	10.15	9.58
AP3B1	CSNK1G3	945	569	808	837	985	0.148	11.06	9.34	9.39	9.05	9.63	10.00	10.43	9.65	10.25	9.23
C20orf27	CSNK2A1	707	842	773	922	798	0.284	11.03	10.82	10.46	11.17	9.43	10.90	9.28	11.04	9.49	12.32
CHD7	CSPP1	647	633	847	686	916	0.046	10.77	8.03	9.37	8.72	9.46	9.25	10.16	9.30	11.18	10.27
CRY2	CSRNP1	661	531	106	741	439	0.386	10.52	13.20	12.46	9.86	12.61	11.79	11.41	12.87	12.79	11.27
ARHGEF17	CSRP1	582	110	848	822	907	0.281	8.33	11.35	12.91	14.70	9.98	12.49	13.02	14.76	11.02	11.20
COX7B	CSTF2	595	897	977	894	666	0.264	9.67	8.62	11.66	7.77	11.90	7.60	10.71	7.60	13.03	7.99
CHAF1A	CSTF3	588	773	718	586	640	0.000	9.43	9.04	8.20	9.80	7.93	9.87	7.87	9.20	9.76	9.33
C1orf21	CTDSPL	73	726	524	919	298	0.713	9.70	9.18	12.35	10.62	10.82	10.65	11.47	11.52	13.62	10.37
CAT	CTDSPL	489	559	689	942	372	0.760	13.04	9.18	10.23	10.62	14.24	10.65	12.43	11.52	12.34	10.37
CASZ1	CTNNBIP1	635	185	168	923	365	0.778	8.90	9.76	5.17	10.87	7.92	9.26	10.33	10.07	11.33	9.33
CEP104	CTNNBIP1	896	659	515	880	98	0.483	9.96	9.76	9.84	10.87	10.36	9.26	9.83	10.07	10.51	9.33
CCDC86	CTPS1	958	928	515	999	995	0.300	8.66	9.54	8.09	9.54	8.38	11.61	7.98	9.69	9.88	10.26
CCNF	CTPS1	910	970	450	728	838	0.114	8.36	9.54	7.84	9.54	6.71	11.61	6.33	9.69	7.60	10.26
ADPGK	CTSB	745	906	692	921	976	0.210	12.19	14.59	9.39	14.05	10.85	14.91	11.53	15.69	9.40	13.53
AMICA1	CTSB	743	22	756	534	381	0.034	13.99	14.59	3.15	14.05	8.01	14.91	10.35	15.69	5.76	13.53
CFB	CTSB	203	99	922	826	633	0.422	6.78	14.59	7.18	14.05	16.43	14.91	11.30	15.69	7.74	13.53
ABCC3	CTSD	654	746	732	792	741	0.147	10.18	15.56	5.37	13.77	14.13	15.00	11.09	15.94	5.97	14.40
ABCA3	CTSH	357	125	435	1000	458	1.000	8.87	12.52	12.96	10.70	7.45	11.84	13.89	13.68	10.00	9.48
BTBD9	CTSH	750	195	653	960	622	0.657	10.00	12.52	11.61	10.70	8.51	11.84	9.93	13.68	9.62	9.48
CACNA2D2	CTSH	85	34	233	998	693	0.899	8.53	12.52	9.49	10.70	5.92	11.84	11.55	13.68	7.82	9.48
CD47	CTSH	702	124	833	855	782	0.301	11.79	12.52	12.20	10.70	10.56	11.84	12.96	13.68	10.21	9.48
CISH	CTSH	809	106	101	845	203	0.535	10.79	12.52	4.33	10.70	11.06	11.84	10.54	13.68	10.12	9.48
CREBRF	CTSH	479	278	730	171	402	0.000	12.18	12.52	9.91	10.70	10.51	11.84	11.17	13.68	10.55	9.48
COPZ2	CTSK	97	363	602	718	594	0.338	7.28	9.37	6.55	6.74	9.66	8.27	8.42	10.25	10.75	9.04
APOE	CTSL	745	430	319	422	387	0.000	8.26	10.58	14.36	10.41	16.57	12.48	12.62	12.87	8.73	11.25
ATP6V0C	CTSL	230	791	999	908	833	0.300	14.12	10.58	14.26	10.41	12.30	12.48	12.91	12.87	12.61	11.25
BTN2A2	CTSO	859	219	756	574	956	0.037	9.71	9.69	6.53	8.95	8.15	11.32	9.79	10.71	7.49	8.60
ACAP1	CTSS	672	533	277	84	692	0.000	13.89	14.85	5.01	6.04	8.36	10.35	10.03	12.64	7.66	7.92
ACP2	CTSS	658	70	915	901	560	0.492	10.17	14.85	10.30	6.04	12.20	10.35	10.28	12.64	9.52	7.92
CD3EAP	CTU2	664	910	958	983	962	0.219	5.67	9.04	5.88	9.06	6.12	8.86	4.80	8.12	7.46	9.61
ALAS1	CXCL16	496	363	430	976	65	0.952	11.62	12.71	10.59	8.06	13.01	10.43	11.01	12.24	11.83	6.89
AKAP1	CYB561	967	766	283	854	712	0.292	9.26	9.29	11.42	11.27	12.35	10.34	11.05	11.31	13.22	7.76
ALDH3B1	CYB561	149	41	730	890	871	0.479	11.94	9.29	5.99	11.27	7.87	10.34	11.59	11.31	7.26	7.76
AQP3	CYB561	907	119	851	709	314	0.209	9.85	9.29	4.58	11.27	12.66	10.34	11.45	11.31	7.94	7.76
ARFGAP2	CYB561	690	891	608	962	648	0.505	11.87	9.29	12.18	11.27	12.26	10.34	11.63	11.31	12.53	7.76
ARSD	CYB561	280	69	126	930	922	0.649	10.03	9.29	7.62	11.27	11.49	10.34	9.70	11.31	7.24	7.76
CACFD1	CYB561	594	298	702	933	832	0.552	8.73	9.29	9.08	11.27	11.92	10.34	9.64	11.31	9.21	7.76
CNPPD1	CYB561	190	359	506	935	590	0.822	12.72	9.29	10.67	11.27	11.15	10.34	11.10	11.31	11.93	7.76
ACO1	CYB561D2	800	476	876	895	929	0.255	9.05	10.48	10.39	7.21	13.26	9.72	10.90	8.52	11.13	8.23
CD63	CYB561D2	769	514	980	883	946	0.241	14.13	10.48	12.63	7.21	13.12	9.72	14.90	8.52	13.84	8.23
AK1	CYB5A	760	832	639	965	914	0.357	10.63	8.87	11.71	8.50	10.92	14.50	11.47	12.26	13.90	8.86
ATF7	CYB5A	67	830	793	581	844	0.041	10.85	8.87	9.68	8.50	10.22	14.50	11.17	12.26	10.96	8.86
BTBD9	CYB5A	59	513	821	975	840	0.613	10.00	8.87	11.61	8.50	8.51	14.50	9.93	12.26	9.62	8.86
CACNA2D2	CYB5A	567	704	168	978	756	0.693	8.53	8.87	9.49	8.50	5.92	14.50	11.55	12.26	7.82	8.86
CBX7	CYBRD1	760	17	535	977	707	0.703	11.78	10.73	13.75	10.79	10.79	9.89	11.81	13.57	12.54	11.05
CDCA4	CYC1	849	665	789	983	556	0.536	8.56	11.42	4.77	11.83	6.78	12.48	6.79	11.03	6.31	13.47
ALDH2	CYFIP2	479	108	312	719	317	0.438	12.31	13.30	14.12	14.10	15.62	10.95	13.79	10.57	13.17	9.29
ARSD	CYFIP2	524	57	322	478	271	0.000	10.03	13.30	7.62	14.10	11.49	10.95	9.70	10.57	7.24	9.29
CD74	CYFIP2	791	104	118	821	229	0.496	16.09	13.30	11.52	14.10	13.32	10.95	16.98	10.57	12.63	9.29
CISH	CYFIP2	642	97	36	646	61	0.221	10.79	13.30	4.33	14.10	11.06	10.95	10.54	10.57	10.12	9.29
CREBRF	CYFIP2	392	735	221	742	174	0.366	12.18	13.30	9.91	14.10	10.51	10.95	11.17	10.57	10.55	9.29
ACAP1	CYLD	733	215	387	563	292	0.095	13.89	12.02	5.01	11.09	8.36	10.70	10.03	11.44	7.66	11.98
AIF1	CYLD	520	559	855	175	588	0.000	12.41	12.02	6.11	11.09	7.75	10.70	10.00	11.44	6.51	11.98
ARHGAP30	CYLD	829	467	897	388	675	0.000	14.26	12.02	5.78	11.09	8.61	10.70	11.40	11.44	7.30	11.98
BTN2A2	CYLD	838	328	786	867	371	0.422	9.71	12.02	6.53	11.09	8.15	10.70	9.79	11.44	7.49	11.98
BTN3A1	CYLD	835	490	520	620	94	0.170	12.26	12.02	8.62	11.09	10.33	10.70	11.45	11.44	8.58	11.98
CD40	CYLD	726	300	791	855	675	0.364	9.40	12.02	6.30	11.09	9.22	10.70	10.51	11.44	8.76	11.98
CD74	CYLD	377	468	780	782	103	0.424	16.09	12.02	11.52	11.09	13.32	10.70	16.98	11.44	12.63	11.98
CTSH	CYLD	709	243	733	58	142	0.000	12.52	12.02	10.70	11.09	11.84	10.70	13.68	11.44	9.48	11.98
ABCA3	CYP27A1	426	70	47	620	488	0.240	8.87	10.83	12.96	10.07	7.45	14.61	13.89	12.12	10.00	10.70
ARHGAP25	CYP27A1	570	318	181	580	281	0.125	13.28	10.83	6.44	10.07	8.31	14.61	10.21	12.12	7.50	10.70
ARHGAP30	CYP27A1	502	676	139	872	259	0.655	14.26	10.83	5.78	10.07	8.61	14.61	11.40	12.12	7.30	10.70
BTN2A2	CYP27A1	396	443	631	377	270	0.000	9.71	10.83	6.53	10.07	8.15	14.61	9.79	12.12	7.49	10.70
C1orf162	CYP27A1	260	664	129	891	509	0.696	13.64	10.83	7.02	10.07	8.88	14.61	10.81	12.12	8.91	10.70
CD53	CYP27A1	439	193	71	842	337	0.684	15.30	10.83	8.05	10.07	8.96	14.61	12.14	12.12	7.24	10.70
CREBRF	CYP4V2	531	680	734	599	268	0.084	12.18	8.81	9.91	9.85	10.51	12.81	11.17	9.73	10.55	8.58
CEP85L	CYTH4	358	253	533	438	173	0.000	9.45	14.41	8.46	6.46	8.04	8.43	8.96	10.87	10.51	7.26
CTSK	CYTH4	899	193	509	53	877	0.000	9.37	14.41	6.74	6.46	8.27	8.43	10.25	10.87	9.04	7.26
ANXA6	DAB2	708	280	761	608	685	0.054	13.34	10.19	13.41	7.96	13.42	9.53	13.49	12.96	13.33	10.09
C19orf59	DAB2	210	332	791	449	324	0.000	13.16	10.19	2.26	7.96	4.81	9.53	10.23	12.96	3.80	10.09
CYP27A1	DAB2	493	395	83	761	68	0.522	10.83	10.19	10.07	7.96	14.61	9.53	12.12	12.96	10.70	10.09
CYTH4	DAB2	347	639	975	653	969	0.084	14.41	10.19	6.46	7.96	8.43	9.53	10.87	12.96	7.26	10.09
CERS2	DAGLB	957	498	728	907	913	0.293	11.73	10.97	10.11	10.20	13.35	9.80	12.00	9.96	9.89	9.92
ALDH3B1	DALRD3	847	138	789	970	921	0.411	11.94	10.04	5.99	9.40	7.87	8.62	11.59	8.82	7.26	8.80
C11orf1	DALRD3	742	842	760	964	891	0.310	7.60	10.04	7.71	9.40	8.42	8.62	6.92	8.82	7.80	8.80
C11orf54	DAPK1	781	663	438	985	329	0.748	9.55	10.51	8.73	11.51	12.38	11.79	9.43	12.09	10.70	8.20
CABLES1	DAPK1	304	324	776	977	703	0.715	6.43	10.51	11.89	11.51	9.34	11.79	9.38	12.09	7.16	8.20
CAT	DAPK1	614	317	459	945	597	0.784	13.04	10.51	10.23	11.51	14.24	11.79	12.43	12.09	12.34	8.20
ARRB1	DAPK2	588	290	325	890	416	0.736	11.24	11.84	11.27	8.02	8.65	7.44	11.25	11.25	8.61	11.68
ARSD	DAPK2	900	296	302	762	441	0.393	10.03	11.84	7.62	8.02	11.49	7.44	9.70	11.25	7.24	11.68
CACNA2D2	DAPK2	21	198	559	886	481	0.743	8.53	11.84	9.49	8.02	5.92	7.44	11.55	11.25	7.82	11.68
CALCOCO2	DAPK2	657	579	759	876	650	0.429	12.24	11.84	10.94	8.02	12.12	7.44	12.92	11.25	12.94	11.68
CLN6	DBI	711	272	524	996	84	0.875	10.44	10.16	9.50	11.94	10.21	13.23	9.57	11.33	9.88	10.67
CALU	DBN1	427	786	929	813	597	0.278	10.20	10.69	10.37	12.63	11.56	7.90	12.92	10.99	11.96	10.81
AGO1	DBT	837	945	792	776	922	0.000	11.49	8.72	11.13	9.65	10.11	11.34	10.81	9.25	10.50	10.85
CHMP4A	DCAF11	916	693	269	990	722	0.565	11.33	12.42	10.53	12.33	10.10	13.56	10.35	11.24	9.72	12.31
ASPH	DCBLD2	767	673	860	996	876	0.404	11.49	6.54	11.91	8.67	11.52	9.99	12.16	9.90	12.14	9.53
CALU	DCBLD2	628	840	664	789	776	0.149	10.20	6.54	10.37	8.67	11.56	9.99	12.92	9.90	11.96	9.53
C9orf117	DCDC2B	283	621	114	1000	341	0.940	5.25	3.51	4.50	2.29	4.60	1.84	7.44	3.55	5.59	2.26
AKT3	DCHS1	900	414	915	628	608	0.074	9.09	8.18	11.69	9.99	8.17	7.99	10.97	11.29	9.55	8.87
ANXA6	DCHS1	751	434	785	577	841	0.038	13.34	8.18	13.41	9.99	13.42	7.99	13.49	11.29	13.33	8.87
C11orf95	DCHS1	901	640	84	801	428	0.382	7.67	8.18	10.91	9.99	10.18	7.99	9.46	11.29	9.89	8.87
CDK14	DCHS1	377	327	183	748	411	0.496	9.57	8.18	11.72	9.99	9.84	7.99	9.75	11.29	9.16	8.87
CTIF	DCHS1	622	630	417	790	326	0.454	9.55	8.18	13.07	9.99	11.94	7.99	11.26	11.29	10.87	8.87
ASCC1	DCLRE1A	729	673	663	989	864	0.513	10.20	7.66	9.19	8.70	9.38	9.10	9.06	7.31	10.25	8.69
CHUK	DCLRE1A	811	889	876	968	652	0.322	10.43	7.66	8.90	8.70	10.07	9.10	9.69	7.31	10.40	8.69
COQ9	DCLRE1A	856	884	853	1000	242	0.454	9.74	7.66	10.72	8.70	11.79	9.10	9.62	7.31	12.54	8.69
ATF7	DCXR	329	580	347	411	738	0.000	10.85	10.80	9.68	11.08	10.22	14.79	11.17	10.53	10.96	11.74
C22orf29	DDT	599	695	396	940	706	0.630	9.34	9.68	10.21	8.37	9.26	11.88	9.35	8.07	9.28	9.24
CDCA4	DDX20	822	816	934	943	536	0.332	8.56	9.47	4.77	8.12	6.78	8.77	6.79	8.92	6.31	9.92
BOP1	DDX21	818	422	990	895	960	0.236	8.23	11.18	6.79	9.42	6.88	11.28	6.09	12.04	9.38	12.12
C17orf96	DDX21	695	253	906	838	789	0.265	6.39	11.18	10.04	9.42	7.97	11.28	5.80	12.04	5.66	12.12
ASB6	DDX31	897	610	983	973	990	0.220	10.19	8.57	10.19	7.73	8.88	9.20	8.88	8.61	8.91	9.25
ATP13A3	DDX39A	406	645	627	652	912	0.092	11.09	11.50	10.35	9.27	12.83	10.41	12.31	11.07	11.02	9.99
CCNF	DDX39A	894	551	791	790	849	0.119	8.36	11.50	7.84	9.27	6.71	10.41	6.33	11.07	7.60	9.99
CDCA4	DDX49	831	650	919	992	866	0.351	8.56	10.98	4.77	10.30	6.78	10.61	6.79	9.75	6.31	10.64
BCCIP	DDX54	850	688	999	991	983	0.226	9.67	10.82	9.87	9.82	10.40	10.83	9.72	10.70	11.07	11.88
C12orf29	DDX54	565	670	753	915	904	0.384	7.93	10.82	9.59	9.82	9.06	10.83	8.00	10.70	8.78	11.88
C12orf45	DDX54	948	852	914	953	985	0.072	7.38	10.82	6.16	9.82	7.77	10.83	6.39	10.70	7.36	11.88
C1QBP	DDX54	890	984	1000	995	779	0.166	10.41	10.82	10.78	9.82	11.31	10.83	10.25	10.70	11.65	11.88
CCDC59	DDX54	730	814	925	916	952	0.144	9.24	10.82	7.95	9.82	8.80	10.83	8.72	10.70	9.65	11.88
ATXN7	DENND3	754	777	735	768	871	0.024	11.17	14.35	9.38	11.74	10.34	9.20	10.77	13.24	10.57	10.45
CDCA4	DENR	875	609	948	990	569	0.479	8.56	10.08	4.77	10.55	6.78	10.55	6.79	9.97	6.31	11.15
CLU	DES	93	441	300	672	323	0.344	12.76	9.74	18.59	7.62	16.43	8.60	14.68	13.06	10.77	18.27
CECR5	DGCR14	920	990	942	997	668	0.234	10.09	10.54	9.49	9.49	11.00	8.81	9.45	8.63	10.69	9.43
AHCYL2	DGKD	805	91	860	643	430	0.143	9.44	12.83	12.04	10.45	9.53	10.31	11.27	12.12	11.67	12.92
CISH	DGKD	504	284	215	857	462	0.712	10.79	12.83	4.33	10.45	11.06	10.31	10.54	12.12	10.12	12.92
ARL6IP6	DGUOK	814	485	785	968	754	0.509	9.89	10.65	8.03	9.48	8.05	9.65	8.71	9.37	8.59	9.04
C7orf73	DGUOK	408	838	966	996	825	0.427	11.44	10.65	9.33	9.48	10.50	9.65	9.70	9.37	10.98	9.04
CDCA4	DGUOK	760	747	925	965	862	0.283	8.56	10.65	4.77	9.48	6.78	9.65	6.79	9.37	6.31	9.04
CKAP5	DHCR7	728	546	339	867	330	0.597	10.46	10.54	12.52	10.79	11.69	13.03	11.16	10.19	12.55	9.04
CAMK2D	DHRS3	900	26	735	463	413	0.000	9.69	10.29	11.23	9.60	10.78	13.74	11.40	11.45	12.75	11.36
CIRH1A	DHX34	399	759	794	530	983	0.015	9.74	13.36	10.10	9.75	9.84	10.42	9.82	10.15	11.51	9.82
C12orf45	DHX37	918	783	826	949	937	0.166	7.38	9.92	6.16	9.03	7.77	9.58	6.39	9.34	7.36	10.78
AEBP1	DIP2C	790	120	203	566	122	0.099	9.24	6.76	11.07	11.03	11.28	10.38	14.79	9.73	10.88	11.82
ALG3	DIRC2	174	582	992	687	639	0.170	10.27	10.49	8.42	8.15	11.21	8.26	9.57	8.61	10.21	10.75
APEX2	DKC1	976	941	995	982	926	0.051	10.16	10.24	8.07	9.41	9.64	10.22	9.13	10.14	9.24	10.86
C15orf39	DKC1	589	573	924	939	687	0.491	13.09	10.24	7.75	9.41	8.39	10.22	10.65	10.14	8.70	10.86
DHX37	DKC1	988	822	1000	997	986	0.098	9.92	10.24	9.03	9.41	9.58	10.22	9.34	10.14	10.78	10.86
CPSF7	DMWD	322	778	418	956	932	0.557	12.31	9.76	12.10	11.70	12.53	8.99	12.22	10.35	12.36	10.55
C5orf56	DMXL1	830	468	287	313	689	0.000	9.87	9.67	6.55	10.24	8.00	10.38	8.50	10.35	8.42	10.41
ADAT3	DNAJB1	526	538	308	385	375	0.000	8.01	13.83	4.31	12.56	6.86	13.06	5.58	12.82	5.98	10.52
DGKA	DNAJB11	680	590	476	153	798	0.000	12.48	10.74	10.12	9.41	8.12	11.68	10.68	10.83	7.65	9.94
CD79A	DNAJB9	229	247	334	300	358	0.000	11.51	10.08	1.87	9.70	5.22	12.42	6.01	10.56	3.79	11.03
C17orf96	DNAJC2	718	670	775	616	629	0.000	6.39	9.07	10.04	8.82	7.97	9.59	5.80	9.29	5.66	10.55
ABHD11	DNAJC30	879	796	806	980	883	0.278	9.61	8.01	9.45	8.89	9.30	9.05	8.99	6.91	8.70	8.67
CBY1	DNAL4	979	669	999	1000	997	0.178	7.76	8.91	8.48	9.85	9.02	8.35	8.47	8.62	8.97	8.05
ANGPTL4	DNTTIP1	9	345	741	277	165	0.000	6.89	11.51	9.56	8.97	12.55	8.97	9.98	9.33	9.43	10.64
CLCF1	DNTTIP1	59	411	897	528	710	0.028	8.21	11.51	3.87	8.97	6.65	8.97	8.04	9.33	6.31	10.64
DDX31	DPH2	991	686	949	996	989	0.184	8.57	9.68	7.73	9.57	9.20	9.74	8.61	9.04	9.25	10.95
CSTF2	DPY30	800	913	947	952	881	0.134	8.62	9.35	7.77	9.51	7.60	9.55	7.60	8.89	7.99	9.58
ACACB	DPYSL2	551	359	211	686	74	0.346	9.42	10.47	10.48	15.09	13.66	10.17	10.47	13.73	14.55	10.69
B3GNT1	DPYSL2	837	818	390	906	560	0.455	7.34	10.47	13.27	15.09	9.77	10.17	9.68	13.73	10.26	10.69
CABLES1	DPYSL2	294	208	322	796	761	0.462	6.43	10.47	11.89	15.09	9.34	10.17	9.38	13.73	7.16	10.69
CLSTN1	DST	835	295	690	864	810	0.310	11.05	8.25	15.55	14.78	9.94	13.41	12.37	14.55	11.37	14.21
COX20	DSTYK	788	760	910	689	830	0.000	10.48	9.95	11.34	11.04	10.96	8.66	11.33	9.75	11.71	10.73
C20orf27	DTD1	707	960	516	977	906	0.409	11.03	9.64	10.46	10.00	9.43	8.31	9.28	8.89	9.49	9.80
C15orf61	DTWD1	744	759	820	894	454	0.377	7.55	8.26	7.69	7.92	7.55	8.78	6.69	9.01	9.87	9.09
CTSH	DTX4	754	41	98	215	370	0.000	12.52	9.12	10.70	11.15	11.84	11.96	13.68	11.50	9.48	7.16
ADM	DUSP14	256	279	211	144	502	0.000	12.97	7.35	7.41	9.14	10.45	9.12	12.16	7.70	10.85	8.73
C17orf96	DUSP14	791	949	399	529	415	0.029	6.39	7.35	10.04	9.14	7.97	9.12	5.80	7.70	5.66	8.73
AHCYL2	DUSP16	880	396	454	733	862	0.233	9.44	10.27	12.04	8.88	9.53	10.98	11.27	9.87	11.67	9.93
CKS1B	E2F1	675	842	739	873	770	0.233	7.72	9.19	5.80	8.23	8.94	5.88	7.23	7.10	7.10	7.02
COX8A	E2F1	423	784	793	846	307	0.404	11.93	9.19	12.12	8.23	11.91	5.88	11.29	7.10	13.09	7.02
CPSF3	E2F1	376	813	796	862	594	0.372	10.18	9.19	8.89	8.23	9.52	5.88	9.11	7.10	9.79	7.02
CPSF4	E2F1	516	786	545	809	836	0.290	9.86	9.19	10.18	8.23	9.49	5.88	9.24	7.10	10.35	7.02
CSE1L	E2F1	520	826	773	777	563	0.237	10.35	9.19	10.96	8.23	10.78	5.88	10.85	7.10	11.76	7.02
DNMT3A	E2F1	240	624	706	626	523	0.116	10.58	9.19	8.27	8.23	8.81	5.88	9.30	7.10	10.10	7.02
CTPS1	E2F3	128	850	182	917	877	0.470	9.54	10.53	9.54	8.80	11.61	8.37	9.69	8.99	10.26	10.01
COA7	E2F6	101	108	96	50	47	0.000	0.00	7.84	0.00	8.15	0.00	8.74	0.00	8.14	0.00	10.53
BZW2	ECE2	760	537	997	962	2	0.544	9.81	7.85	9.33	10.21	9.12	8.77	9.84	5.65	12.65	7.96
CCDC86	ECE2	752	375	997	968	995	0.342	8.66	7.85	8.09	10.21	8.38	8.77	7.98	5.65	9.88	7.96
E2F6	ECE2	823	520	939	886	776	0.270	7.84	7.85	8.15	10.21	8.74	8.77	8.14	5.65	10.53	7.96
DDB2	ECSIT	644	487	892	719	514	0.249	10.32	10.88	7.40	10.86	10.00	11.11	9.68	9.57	8.87	11.94
AAGAB	EDC3	968	887	962	930	956	0.021	10.37	10.39	10.56	10.02	9.88	9.76	10.01	9.63	10.92	10.07
COPS2	EDC3	467	934	952	689	973	0.095	9.94	10.39	10.59	10.02	10.89	9.76	10.92	9.63	12.22	10.07
ABCA3	EDEM1	598	921	610	915	816	0.360	8.87	11.59	12.96	9.57	7.45	13.17	13.89	12.18	10.00	9.81
BAD	EEF1G	709	571	408	964	900	0.588	9.87	14.21	10.51	13.16	9.92	13.82	9.23	14.56	9.16	15.14
ANXA6	EFEMP2	270	11	399	941	895	0.684	13.34	9.81	13.41	10.23	13.42	9.16	13.49	11.74	13.33	9.95
ATXN1	EFEMP2	838	14	699	793	616	0.282	11.81	9.81	12.07	10.23	10.55	9.16	11.18	11.74	11.71	9.95
C16orf45	EFEMP2	641	15	180	837	62	0.604	8.03	9.81	13.31	10.23	9.72	9.16	9.12	11.74	11.79	9.95
COPZ2	EFEMP2	138	940	578	960	877	0.472	7.28	9.81	6.55	10.23	9.66	9.16	8.42	11.74	10.75	9.95
C11orf49	EFHC1	712	786	910	859	905	0.110	9.06	8.26	11.74	9.17	7.95	9.19	9.28	10.15	8.62	8.16
CAPS	EFHC1	883	624	597	998	978	0.455	10.54	8.26	9.07	9.17	9.91	9.19	10.29	10.15	8.30	8.16
DNAAF1	EFHC1	159	741	516	933	520	0.728	5.10	8.26	6.85	9.17	3.11	9.19	6.86	10.15	3.17	8.16
ASB7	EFTUD1	440	954	840	883	978	0.213	9.77	9.55	7.86	7.98	9.01	8.71	8.36	8.70	8.73	10.02
BCL6B	EHD1	33	489	469	569	566	0.105	4.76	13.78	6.88	10.60	7.47	10.85	10.71	12.31	8.64	11.16
ABHD16A	EHMT2	323	979	760	967	780	0.430	12.08	10.78	10.78	12.55	11.23	9.97	10.70	10.43	10.93	9.76
APEX1	EHMT2	969	992	758	900	778	0.132	11.34	10.78	11.28	12.55	11.78	9.97	11.57	10.43	11.78	9.76
C6orf89	EHMT2	319	961	706	943	901	0.361	11.83	10.78	12.21	12.55	11.94	9.97	12.07	10.43	12.15	9.76
DHTKD1	EHMT2	174	423	709	979	191	0.854	10.60	10.78	9.45	12.55	13.17	9.97	9.06	10.43	10.94	9.76
CCNF	EIF1AD	180	951	771	836	914	0.201	8.36	10.07	7.84	8.60	6.71	9.52	6.33	9.10	7.60	10.03
E2F3	EIF3B	82	715	948	893	843	0.310	10.53	11.69	8.80	11.66	8.37	12.57	8.99	12.31	10.01	13.27
C12orf10	EIF4B	864	753	979	924	967	0.116	10.36	13.00	10.40	12.27	9.37	12.64	9.09	13.41	10.05	14.46
ADSL	EIF4EBP1	857	180	922	976	557	0.534	10.59	10.27	9.07	5.74	10.19	10.68	9.86	9.06	12.92	10.77
APEX1	EIF4EBP1	918	182	930	970	883	0.325	11.34	10.27	11.28	5.74	11.78	10.68	11.57	9.06	11.78	10.77
BUB3	EIF4EBP1	723	391	936	711	889	0.105	11.10	10.27	10.26	5.74	11.07	10.68	11.01	9.06	10.86	10.77
CEP250	EIF4EBP1	722	226	645	675	621	0.130	11.00	10.27	10.42	5.74	9.47	10.68	9.65	9.06	10.08	10.77
CIB2	EIF4EBP1	628	601	419	253	64	0.000	6.31	10.27	7.84	5.74	4.52	10.68	5.28	9.06	8.30	10.77
CMC2	EIF4EBP1	715	340	852	585	642	0.043	8.88	10.27	10.09	5.74	9.61	10.68	8.51	9.06	9.74	10.77
COA6	EIF4EBP1	863	378	901	928	907	0.271	8.37	10.27	8.80	5.74	8.48	10.68	6.97	9.06	10.03	10.77
CPSF3	EIF4EBP1	777	138	885	915	848	0.325	10.18	10.27	8.89	5.74	9.52	10.68	9.11	9.06	9.79	10.77
CSE1L	EIF4EBP1	783	107	882	928	672	0.438	10.35	10.27	10.96	5.74	10.78	10.68	10.85	9.06	11.76	10.77
DENR	EIF4EBP1	489	139	921	887	191	0.581	10.08	10.27	10.55	5.74	10.55	10.68	9.97	9.06	11.15	10.77
DKC1	EIF4EBP1	687	482	905	897	674	0.415	10.24	10.27	9.41	5.74	10.22	10.68	10.14	9.06	10.86	10.77
DNAJC9	EIF4EBP1	633	180	862	637	633	0.072	8.39	10.27	8.43	5.74	7.86	10.68	7.47	9.06	8.46	10.77
CTNNBIP1	EIF4EBP2	952	440	765	903	105	0.472	9.76	12.86	10.87	11.96	9.26	12.87	10.07	12.98	9.33	13.24
DDR1	EIF4G1	741	389	504	823	770	0.389	8.38	12.33	12.96	13.13	8.82	14.36	11.84	14.13	11.55	15.01
DPH2	ELK1	925	499	975	876	880	0.188	9.68	10.17	9.57	11.83	9.74	10.67	9.04	9.96	10.95	10.81
ALDH2	EMC3	456	231	563	850	534	0.651	12.31	12.01	14.12	10.63	15.62	10.85	13.79	10.46	13.17	12.37
CD74	EMC3	105	255	736	608	154	0.162	16.09	12.01	11.52	10.63	13.32	10.85	16.98	10.46	12.63	12.37
CMTM6	EMC3	384	399	687	955	512	0.810	12.87	12.01	8.19	10.63	12.51	10.85	11.43	10.46	8.55	12.37
DHX33	EMC6	804	679	928	965	667	0.391	8.76	9.43	9.66	8.83	10.04	9.81	9.26	8.30	10.12	11.07
BCAR1	EMC8	214	835	952	681	950	0.090	6.18	9.93	11.74	8.96	11.69	9.29	11.81	8.79	12.55	9.92
E2F4	EMC8	999	950	997	1000	1000	0.027	12.00	9.93	10.79	8.96	10.98	9.29	11.60	8.79	11.32	9.92
DKC1	EMD	426	788	963	740	877	0.120	10.24	11.47	9.41	10.38	10.22	10.54	10.14	10.99	10.86	11.57
ARL6IP6	EME1	160	317	571	651	599	0.217	9.89	5.35	8.03	2.86	8.05	3.62	8.71	3.91	8.59	4.46
CCNF	EME1	916	129	844	910	232	0.443	8.36	5.35	7.84	2.86	6.71	3.62	6.33	3.91	7.60	4.46
CMC2	EME1	750	342	678	363	49	0.000	8.88	5.35	10.09	2.86	9.61	3.62	8.51	3.91	9.74	4.46
CPSF4	EME1	624	359	583	599	403	0.107	9.86	5.35	10.18	2.86	9.49	3.62	9.24	3.91	10.35	4.46
DUSP14	EME1	458	34	510	401	191	0.000	7.35	5.35	9.14	2.86	9.12	3.62	7.70	3.91	8.73	4.46
EBP	EME1	785	327	376	614	745	0.114	10.24	5.35	9.07	2.86	13.01	3.62	9.78	3.91	8.05	4.46
EMC9	EME1	788	151	361	424	516	0.000	8.73	5.35	8.59	2.86	9.14	3.62	7.64	3.91	9.60	4.46
ACOX1	ENPP4	99	613	296	913	904	0.568	12.20	8.85	10.77	9.95	13.29	9.22	10.86	10.44	11.83	11.03
APLP2	ENPP4	366	847	855	959	760	0.437	14.29	8.85	14.14	9.95	14.20	9.22	15.53	10.44	12.35	11.03
ARRB1	ENPP4	269	567	196	644	409	0.255	11.24	8.85	11.27	9.95	8.65	9.22	11.25	10.44	8.61	11.03
DAPK1	ENPP4	617	688	70	746	218	0.340	10.51	8.85	11.51	9.95	11.79	9.22	12.09	10.44	8.20	11.03
ANXA6	ENTPD1	40	641	697	848	588	0.483	13.34	12.63	13.41	10.25	13.42	9.37	13.49	11.59	13.33	9.95
COL6A1	ENTPD1	29	601	923	834	586	0.407	8.83	12.63	12.83	10.25	13.28	9.37	15.30	11.59	12.76	9.95
AHNAK	EPB41L2	871	387	935	954	274	0.505	13.24	8.91	13.74	12.59	13.90	10.15	16.95	12.95	15.51	10.64
ANXA6	EPB41L2	900	606	729	713	945	0.053	13.34	8.91	13.41	12.59	13.42	10.15	13.49	12.95	13.33	10.64
CACNA2D2	EPHX1	820	1	160	456	510	0.000	8.53	9.02	9.49	12.02	5.92	15.05	11.55	12.35	7.82	12.04
ADIPOR2	EPT1	799	268	750	606	879	0.053	11.66	8.79	11.71	10.37	12.99	11.34	12.53	9.83	11.90	10.43
BCL2L13	EPT1	893	928	973	714	986	0.000	10.77	8.79	10.58	10.37	11.02	11.34	10.38	9.83	12.88	10.43
BOP1	EPT1	831	920	936	666	978	0.000	8.23	8.79	6.79	10.37	6.88	11.34	6.09	9.83	9.38	10.43
EIF5B	EPT1	920	398	927	843	980	0.172	10.79	8.79	12.06	10.37	12.21	11.34	12.28	9.83	13.41	10.43
ACACA	ERBB2	809	52	278	937	247	0.720	9.30	9.14	12.39	9.47	11.38	11.38	11.12	12.06	11.05	10.91
ALDH3B1	ERBB2	29	707	388	984	755	0.737	11.94	9.14	5.99	9.47	7.87	11.38	11.59	12.06	7.26	10.91
APLP2	ERBB2	107	178	113	959	689	0.824	14.29	9.14	14.14	9.47	14.20	11.38	15.53	12.06	12.35	10.91
ARHGEF16	ERBB2	401	665	373	965	180	0.848	3.89	9.14	5.85	9.47	9.03	11.38	7.96	12.06	6.75	10.91
C16orf58	ERGIC1	95	878	709	960	542	0.606	10.36	13.83	11.02	11.36	11.83	13.85	10.83	13.11	9.43	12.29
CYP4V2	ERGIC1	148	265	203	707	660	0.334	8.81	13.83	9.85	11.36	12.81	13.85	9.73	13.11	8.58	12.29
CDCA4	ERH	663	681	966	981	882	0.366	8.56	10.20	4.77	10.31	6.78	10.62	6.79	10.31	6.31	10.31
COQ6	ERH	591	930	993	938	592	0.350	7.48	10.20	6.75	10.31	8.25	10.62	6.39	10.31	8.93	10.31
C11orf49	ERN2	0	306	0	546	0	0.000	9.06	1.51	11.74	1.39	7.95	2.22	9.28	3.53	8.62	1.28
CAPN3	ERN2	0	294	0	171	0	0.000	10.90	1.51	10.87	1.39	11.03	2.22	10.84	3.53	14.61	1.28
APOL1	ERO1L	450	275	810	694	560	0.261	10.45	12.28	7.39	10.03	12.97	11.56	12.13	10.78	8.98	9.95
CADM1	ESAM	52	506	445	794	495	0.585	6.96	9.49	11.53	9.85	10.54	9.21	11.34	13.19	8.66	10.52
ADAP2	ESYT1	358	308	750	879	748	0.509	10.25	11.83	5.86	11.05	7.47	12.42	8.65	12.45	6.87	11.90
COLGALT1	ESYT1	123	799	965	953	868	0.346	12.94	11.83	10.47	11.05	11.53	12.42	12.70	12.45	10.77	11.90
EMP3	ESYT1	859	91	642	902	731	0.438	12.93	11.83	7.03	11.05	8.04	12.42	11.36	12.45	8.15	11.90
ANGPTL4	ESYT2	516	340	655	261	560	0.000	6.89	11.29	9.56	11.46	12.55	11.19	9.98	12.42	9.43	12.53
EHD1	ESYT2	386	513	652	789	582	0.455	13.78	11.29	10.60	11.46	10.85	11.19	12.31	12.42	11.16	12.53
ADAM19	ETS1	82	199	307	888	606	0.723	12.45	12.49	8.38	9.08	9.65	10.77	10.55	13.32	8.32	10.72
BIRC2	ETS1	231	592	672	876	850	0.445	10.88	12.49	10.21	9.08	11.53	10.77	10.94	13.32	11.15	10.72
CAB39	ETS1	108	456	767	825	435	0.516	12.72	12.49	12.00	9.08	11.15	10.77	11.94	13.32	13.20	10.72
CFL2	ETS1	867	333	742	693	366	0.193	7.83	12.49	11.08	9.08	11.89	10.77	10.71	13.32	14.42	10.72
CSF1	ETS1	821	605	940	888	945	0.175	9.75	12.49	9.52	9.08	10.57	10.77	12.27	13.32	10.02	10.72
DPH3	ETS1	51	713	776	458	251	0.000	10.26	12.49	9.47	9.08	9.52	10.77	9.49	13.32	11.01	10.72
EIF4E3	ETS1	131	382	851	887	411	0.599	12.33	12.49	11.06	9.08	9.20	10.77	10.48	13.32	12.11	10.72
C11orf24	EVA1B	784	192	570	694	901	0.159	9.69	8.52	9.16	5.47	12.07	6.86	10.17	8.18	9.27	6.73
COL5A3	EVA1B	363	463	464	510	741	0.015	7.76	8.52	12.54	5.47	10.47	6.86	11.11	8.18	10.78	6.73
DAB2	EVL	511	337	326	535	567	0.047	10.19	12.73	7.96	13.78	9.53	12.91	12.96	12.35	10.09	10.51
COQ6	EXD2	952	930	952	985	658	0.224	7.48	7.95	6.75	10.26	8.25	8.95	6.39	9.16	8.93	9.79
CCNF	EXOSC2	714	969	743	816	685	0.153	8.36	9.58	7.84	9.33	6.71	9.84	6.33	9.16	7.60	9.77
CDCA4	EXOSC2	980	775	938	970	833	0.182	8.56	9.58	4.77	9.33	6.78	9.84	6.79	9.16	6.31	9.77
CHAF1A	EXOSC2	908	931	826	903	682	0.149	9.43	9.58	8.20	9.33	7.93	9.84	7.87	9.16	9.76	9.77
DDX31	EXOSC2	995	765	984	998	938	0.155	8.57	9.58	7.73	9.33	9.20	9.84	8.61	9.16	9.25	9.77
ATP13A3	EXOSC3	657	888	830	160	843	0.000	11.09	9.40	10.35	7.47	12.83	8.51	12.31	7.86	11.02	8.51
CCNF	EXOSC3	270	926	908	857	951	0.178	8.36	9.40	7.84	7.47	6.71	8.51	6.33	7.86	7.60	8.51
EIF3E	EXOSC4	113	570	963	469	962	0.000	12.01	10.59	11.31	7.95	12.18	8.96	12.88	7.52	13.17	8.42
COIL	F11R	764	296	841	613	623	0.057	8.83	12.28	8.38	8.53	9.24	12.90	8.43	13.40	9.41	9.37
DDR1	F11R	603	697	605	914	363	0.625	8.38	12.28	12.96	8.53	8.82	12.90	11.84	13.40	11.55	9.37
DHCR24	F11R	473	81	717	665	65	0.247	9.73	12.28	13.01	8.53	15.56	12.90	14.04	13.40	13.48	9.37
DLG1	F11R	615	285	730	864	492	0.555	9.62	12.28	11.66	8.53	11.09	12.90	10.72	13.40	11.35	9.37
C10orf2	F12	514	556	19	237	374	0.000	8.15	8.44	7.25	6.42	8.68	14.48	6.85	3.99	9.81	2.64
CCHCR1	FAF1	983	872	628	775	579	0.172	9.73	10.38	9.30	10.48	9.44	10.37	8.94	10.08	10.08	12.21
E2F2	FAF1	498	113	742	389	311	0.000	10.89	10.38	1.27	10.48	4.49	10.37	5.81	10.08	3.07	12.21
DYSF	FAM101B	775	11	687	724	185	0.242	14.81	12.28	9.96	8.29	11.29	7.92	11.88	10.13	13.26	9.40
EVA1B	FAM101B	533	202	813	466	547	0.000	8.52	12.28	5.47	8.29	6.86	7.92	8.18	10.13	6.73	9.40
C9orf16	FAM102A	600	657	586	896	858	0.442	11.44	11.21	12.11	12.67	9.66	11.19	9.69	10.81	9.43	8.69
ADCK3	FAM117A	303	886	667	975	221	0.673	11.12	11.82	10.84	7.18	12.86	9.13	10.46	8.76	15.54	7.96
ADHFE1	FAM117A	608	296	837	844	581	0.425	8.66	11.82	9.62	7.18	12.15	9.13	9.00	8.76	11.31	7.96
CABLES1	FAM117A	507	133	867	941	873	0.508	6.43	11.82	11.89	7.18	9.34	9.13	9.38	8.76	7.16	7.96
CIRBP	FAM117A	300	418	300	889	589	0.734	13.12	11.82	13.98	7.18	13.37	9.13	14.05	8.76	13.45	7.96
ABCA3	FAM118B	252	681	947	967	833	0.454	8.87	9.22	12.96	9.21	7.45	8.08	13.89	8.72	10.00	9.93
CCM2	FAM126A	544	170	666	607	583	0.097	12.49	9.19	12.30	8.24	11.97	9.44	10.62	10.83	10.95	11.27
ERBB2	FAM129B	232	717	217	860	747	0.488	9.14	11.31	9.47	10.57	11.38	10.47	12.06	14.10	10.91	10.21
ARSD	FAM134C	959	378	795	935	876	0.317	10.03	11.77	7.62	10.75	11.49	11.60	9.70	10.86	7.24	10.94
EIF4EBP1	FAM162A	780	430	501	867	85	0.594	10.27	9.68	5.74	10.83	10.68	11.58	9.06	9.47	10.77	11.30
ALDH3B1	FAM174B	823	75	258	959	679	0.667	11.94	7.62	5.99	9.12	7.87	8.10	11.59	9.99	7.26	9.70
CNPPD1	FAM174B	369	427	549	932	839	0.670	12.72	7.62	10.67	9.12	11.15	8.10	11.10	9.99	11.93	9.70
DAPK2	FAM174B	912	360	711	899	401	0.493	11.84	7.62	8.02	9.12	7.44	8.10	11.25	9.99	11.68	9.70
ARRB1	FAM177A1	525	626	322	837	666	0.515	11.24	10.58	11.27	10.11	8.65	10.95	11.25	11.18	8.61	10.43
CSE1L	FAM189B	885	900	824	973	883	0.200	10.35	9.82	10.96	10.80	10.78	9.46	10.85	9.64	11.76	10.67
DAP3	FAM189B	928	951	854	981	850	0.171	11.37	9.82	10.48	10.80	11.52	9.46	11.07	9.64	12.05	10.67
CASC3	FAM20B	362	520	981	986	929	0.507	13.41	9.94	12.50	11.44	11.55	10.35	12.73	10.92	12.48	11.37
F11R	FAM20B	395	99	902	867	421	0.550	12.28	9.94	8.53	11.44	12.90	10.35	13.40	10.92	9.37	11.37
ACLY	FAM222B	942	956	852	948	954	0.051	11.68	9.74	11.40	9.60	11.29	9.32	12.19	9.41	10.58	11.46
DCBLD2	FAM3C	353	971	674	765	975	0.178	6.54	8.81	8.67	11.65	9.99	11.01	9.90	10.81	9.53	9.88
C10orf10	FAM49A	67	18	575	579	649	0.081	9.58	12.02	10.57	12.15	12.35	7.72	14.61	10.32	12.39	9.68
ETS1	FAM65A	722	440	918	795	908	0.184	12.49	11.51	9.08	12.35	10.77	10.62	13.32	12.71	10.72	11.34
ENTPD1	FAM69A	250	876	723	853	844	0.246	12.63	8.25	10.25	10.02	9.37	9.17	11.59	7.11	9.95	8.28
APOE	FAM78A	19	40	188	622	275	0.244	8.26	11.43	14.36	9.03	16.57	7.00	12.62	9.04	8.73	10.25
ARRB1	FAM8A1	576	666	551	741	572	0.299	11.24	11.70	11.27	10.72	8.65	12.00	11.25	10.81	8.61	11.06
CABLES1	FAM8A1	40	113	734	839	616	0.503	6.43	11.70	11.89	10.72	9.34	12.00	9.38	10.81	7.16	11.06
COMMD4	FAM96A	581	810	856	994	614	0.557	10.11	9.94	9.65	8.24	10.44	12.15	9.81	9.36	9.55	10.26
CDCA4	FARSA	923	504	891	985	820	0.401	8.56	10.63	4.77	11.62	6.78	10.82	6.79	9.94	6.31	11.16
C19orf48	FARSB	945	843	886	995	841	0.233	9.78	9.69	7.96	10.92	10.20	10.10	8.88	9.67	8.59	11.28
E2F2	FARSB	531	52	657	583	312	0.109	10.89	9.69	1.27	10.92	4.49	10.10	5.81	9.67	3.07	11.28
EIF4E3	FAXDC2	43	140	55	796	347	0.592	12.33	11.01	11.06	10.92	9.20	12.04	10.48	11.36	12.11	9.41
BMP1	FBLN2	873	108	582	481	146	0.000	8.85	7.49	9.37	7.72	11.78	7.89	11.50	11.36	10.18	11.30
BRAP	FBRSL1	748	829	725	758	858	0.021	10.48	11.54	9.43	11.90	9.25	11.88	9.13	11.43	10.50	11.87
ATG12	FBXL17	952	934	878	971	608	0.256	10.68	9.10	10.39	10.82	10.63	9.36	10.40	8.82	10.44	11.48
ALDH5A1	FBXL20	137	503	404	813	22	0.625	9.01	9.47	12.08	6.56	12.51	7.66	8.14	6.79	11.08	7.87
ATXN2	FBXO21	938	950	665	736	869	0.035	10.42	9.27	11.43	11.45	11.08	10.83	11.13	10.71	11.00	11.23
EEF2K	FBXO3	656	885	803	838	199	0.278	8.92	10.38	9.18	10.84	10.05	11.06	10.41	10.81	11.67	11.41
AK1	FBXO38	1	605	475	828	295	0.604	10.63	11.36	11.71	9.64	10.92	10.37	11.47	10.48	13.90	10.98
ARSD	FBXO38	979	419	860	990	821	0.400	10.03	11.36	7.62	9.64	11.49	10.37	9.70	10.48	7.24	10.98
BAIAP2-AS1	FBXO38	897	634	755	939	666	0.402	9.19	11.36	11.71	9.64	9.16	10.37	9.67	10.48	6.66	10.98
CISH	FBXO38	603	293	86	739	284	0.426	10.79	11.36	4.33	9.64	11.06	10.37	10.54	10.48	10.12	10.98
CYFIP2	FBXO38	435	805	649	618	397	0.118	13.30	11.36	14.10	9.64	10.95	10.37	10.57	10.48	9.29	10.98
CCNL2	FBXO42	958	823	831	949	831	0.181	12.15	10.98	12.78	10.21	13.95	9.96	13.76	10.19	12.34	11.04
CCNF	FBXO45	337	923	839	782	751	0.157	8.36	8.37	7.84	10.24	6.71	8.70	6.33	7.90	7.60	10.25
CHAF1A	FBXO45	573	897	786	845	748	0.214	9.43	8.37	8.20	10.24	7.93	8.70	7.87	7.90	9.76	10.25
ECE2	FBXO45	802	558	982	926	761	0.329	7.85	8.37	10.21	10.24	8.77	8.70	5.65	7.90	7.96	10.25
DUSP18	FBXO7	8	595	459	788	880	0.385	8.75	14.15	5.32	11.33	4.74	11.96	6.73	12.13	5.29	10.77
BTN2A2	FCER1G	17	548	562	134	521	0.000	9.71	14.99	6.53	5.78	8.15	8.80	9.79	11.95	7.49	7.30
CD6	FCER1G	6	5	564	48	404	0.000	11.48	14.99	5.64	5.78	6.39	8.80	8.00	11.95	4.34	7.30
AK1	FCGRT	2	568	96	963	867	0.709	10.63	13.82	11.71	9.79	10.92	13.71	11.47	13.32	13.90	11.02
ARL6IP5	FCGRT	855	79	789	909	795	0.348	12.49	13.82	12.08	9.79	10.83	13.71	12.39	13.32	12.76	11.02
CREBL2	FCGRT	170	211	487	955	922	0.699	10.34	13.82	11.30	9.79	11.21	13.71	10.87	13.32	9.68	11.02
CLN6	FEM1B	658	809	773	421	799	0.000	10.44	10.14	9.50	11.36	10.21	11.17	9.57	11.23	9.88	12.64
EDC3	FEM1B	811	901	924	652	800	0.000	10.39	10.14	10.02	11.36	9.76	11.17	9.63	11.23	10.07	12.64
APEX2	FEN1	879	845	982	975	954	0.123	10.16	9.00	8.07	8.83	9.64	8.55	9.13	7.55	9.24	9.42
ARL6IP6	FEN1	351	120	344	640	559	0.251	9.89	9.00	8.03	8.83	8.05	8.55	8.71	7.55	8.59	9.42
C20orf27	FEN1	523	863	693	904	644	0.447	11.03	9.00	10.46	8.83	9.43	8.55	9.28	7.55	9.49	9.42
CLPB	FEN1	820	813	971	861	822	0.064	9.63	9.00	8.34	8.83	9.62	8.55	7.96	7.55	9.32	9.42
FADS2	FEN1	722	121	75	934	33	0.757	9.78	9.00	12.88	8.83	12.28	8.55	10.85	7.55	8.76	9.42
ATG7	FGD2	848	270	957	884	710	0.297	11.17	11.82	9.64	6.05	8.51	8.24	9.40	10.56	9.34	7.26
CTSB	FGD2	853	369	839	794	764	0.162	14.59	11.82	14.05	6.05	14.91	8.24	15.69	10.56	13.53	7.26
CYP27A1	FGD2	519	442	42	850	405	0.691	10.83	11.82	10.07	6.05	14.61	8.24	12.12	10.56	10.70	7.26
APOE	FGD3	8	116	399	177	691	0.000	8.26	14.47	14.36	5.96	16.57	8.36	12.62	10.46	8.73	6.94
CCNF	FGFR1OP	179	925	611	798	856	0.242	8.36	9.56	7.84	9.43	6.71	10.88	6.33	8.99	7.60	9.06
C1orf21	FGFR2	486	56	616	789	35	0.520	9.70	5.05	12.35	11.85	10.82	10.94	11.47	9.19	13.62	4.66
CAPN7	FGFR2	383	549	591	616	143	0.162	9.57	5.05	9.44	11.85	10.19	10.94	10.25	9.19	11.36	4.66
DCAF6	FGFR2	131	33	779	723	106	0.335	11.06	5.05	12.16	11.85	12.31	10.94	10.99	9.19	14.90	4.66
DNAJC19	FGFR2	427	292	788	869	273	0.594	8.17	5.05	9.61	11.85	10.30	10.94	8.61	9.19	10.86	4.66
EIF4A2	FGFR2	489	90	550	491	294	0.000	12.09	5.05	14.85	11.85	13.40	10.94	14.05	9.19	14.63	4.66
C11orf24	FHL3	691	660	616	893	136	0.552	9.69	11.56	9.16	8.18	12.07	7.96	10.17	9.51	9.27	15.11
CDCA4	FIGNL1	937	802	924	949	661	0.236	8.56	7.10	4.77	7.78	6.78	7.89	6.79	6.90	6.31	8.27
E2F2	FIGNL1	428	87	748	496	165	0.000	10.89	7.10	1.27	7.78	4.49	7.89	5.81	6.90	3.07	8.27
EIF4EBP1	FIGNL1	354	128	792	768	44	0.402	10.27	7.10	5.74	7.78	10.68	7.89	9.06	6.90	10.77	8.27
ERLEC1	FKBP2	469	588	944	888	867	0.354	9.94	10.20	11.09	10.60	10.84	11.73	11.24	10.20	10.73	9.25
ADM	FKBP4	171	461	428	228	431	0.000	12.97	11.27	7.41	12.23	10.45	12.11	12.16	11.06	10.85	12.21
DAXX	FKBPL	873	903	918	962	999	0.096	11.80	8.65	10.42	6.28	10.60	7.23	10.83	5.83	11.02	7.32
E2F3	FLAD1	330	735	906	817	728	0.244	10.53	10.40	8.80	9.31	8.37	10.31	8.99	9.53	10.01	10.42
CYB561	FLJ23867	0	0	0	0	0	0.000	9.29	0.00	11.27	0.00	10.34	0.00	11.31	0.00	7.76	0.00
CD22	FMNL1	576	21	847	321	775	0.000	10.95	14.54	9.84	11.04	6.06	8.82	8.08	12.03	4.59	8.26
CTSL	FMNL1	103	670	656	370	666	0.000	10.58	14.54	10.41	11.04	12.48	8.82	12.87	12.03	11.25	8.26
CTSS	FMNL1	661	63	827	279	964	0.000	14.85	14.54	6.04	11.04	10.35	8.82	12.64	12.03	7.92	8.26
ANXA6	FNBP1	747	117	644	636	713	0.068	13.34	12.67	13.41	12.19	13.42	10.58	13.49	11.71	13.33	11.06
ABCA3	FNIP2	653	846	85	783	354	0.348	8.87	9.23	12.96	10.16	7.45	11.56	13.89	11.01	10.00	10.43
CFLAR	FNIP2	221	353	516	789	108	0.570	14.14	9.23	10.79	10.16	12.55	11.56	14.34	11.01	13.98	10.43
ESAM	FNIP2	78	363	127	716	343	0.432	9.49	9.23	9.85	10.16	9.21	11.56	13.19	11.01	10.52	10.43
APOE	FOLR2	540	214	355	700	684	0.288	8.26	8.67	14.36	4.81	16.57	6.89	12.62	8.58	8.73	7.05
AK2	FOXJ3	884	839	794	905	959	0.099	11.59	10.82	10.23	11.03	12.60	10.84	11.53	11.42	11.78	12.28
ARMC6	FOXK2	923	996	217	865	529	0.350	10.18	10.58	9.94	10.94	11.78	10.44	9.17	10.81	10.00	11.85
FAM43A	FOXO1	720	313	247	427	1	0.000	8.81	10.46	8.09	8.99	7.61	10.80	9.18	11.48	8.38	13.10
CD59	FOXP1	229	569	648	647	547	0.163	12.06	11.49	13.27	10.43	12.66	10.41	15.08	11.61	13.88	9.99
CYP4V2	FOXP1	730	304	180	707	372	0.310	8.81	11.49	9.85	10.43	12.81	10.41	9.73	11.61	8.58	9.99
ENG	FOXP1	490	142	474	584	562	0.137	10.44	11.49	10.39	10.43	11.80	10.41	14.72	11.61	11.91	9.99
E2F1	FOXRED1	454	901	603	855	537	0.463	9.19	9.86	8.23	10.69	5.88	10.99	7.10	8.59	7.02	10.03
C15orf52	FRY	807	183	283	801	474	0.452	8.28	10.73	8.91	11.06	8.90	10.32	10.59	11.15	12.32	10.83
DIP2C	FSTL1	391	384	480	846	222	0.692	6.76	8.75	11.03	10.39	10.38	11.17	9.73	14.56	11.82	11.59
C7orf50	FTSJ2	573	833	529	921	674	0.537	9.97	9.48	11.56	9.34	10.34	9.57	10.22	8.70	10.52	10.02
C1orf186	FXYD1	232	195	363	303	174	0.000	6.06	6.66	1.12	11.46	5.48	12.00	5.60	9.40	3.89	13.11
ARHGEF40	FXYD6	749	8	594	918	648	0.591	12.31	8.59	10.53	13.22	12.32	8.56	11.68	10.69	10.77	8.78
ARHGDIB	FYCO1	286	483	794	658	334	0.237	16.50	10.01	8.63	9.16	10.52	10.50	13.01	11.37	10.22	13.90
ARRB1	FYCO1	793	305	708	786	226	0.325	11.24	10.01	11.27	9.16	8.65	10.50	11.25	11.37	8.61	13.90
ASAH1	FYCO1	470	434	874	611	851	0.111	13.59	10.01	11.48	9.16	11.36	10.50	13.46	11.37	11.86	13.90
CASC4	FYCO1	733	569	938	983	411	0.596	10.87	10.01	11.96	9.16	11.40	10.50	11.36	11.37	10.55	13.90
CELF2	FYCO1	726	35	657	889	17	0.587	13.59	10.01	12.90	9.16	8.49	10.50	12.77	11.37	11.43	13.90
CITED2	FYCO1	690	8	267	750	165	0.405	11.30	10.01	9.80	9.16	12.33	10.50	12.67	11.37	11.30	13.90
COL4A3BP	FYCO1	648	155	974	907	47	0.536	11.33	10.01	10.76	9.16	10.66	10.50	10.94	11.37	11.73	13.90
CREBRF	FYCO1	548	430	638	903	207	0.713	12.18	10.01	9.91	9.16	10.51	10.50	11.17	11.37	10.55	13.90
DPYSL2	FYCO1	815	543	809	943	247	0.552	10.47	10.01	15.09	9.16	10.17	10.50	13.73	11.37	10.69	13.90
FAM8A1	FYCO1	655	179	983	974	224	0.633	11.70	10.01	10.72	9.16	12.00	10.50	10.81	11.37	11.06	13.90
ENG	FYN	919	514	485	695	877	0.188	10.44	12.27	10.39	12.80	11.80	10.11	14.72	12.30	11.91	9.58
BATF3	G0S2	570	349	583	789	181	0.501	7.10	11.35	6.62	5.31	5.49	12.74	7.22	11.35	5.38	10.51
CHAF1A	G2E3	609	583	871	666	680	0.070	9.43	8.92	8.20	8.38	7.93	8.22	7.87	8.60	9.76	8.87
EVL	GABARAP	58	801	748	616	795	0.058	12.73	14.91	13.78	13.39	12.91	13.23	12.35	13.52	10.51	13.48
ADIPOR2	GABARAPL1	817	83	261	595	813	0.095	11.66	12.53	11.71	13.99	12.99	13.16	12.53	13.03	11.90	13.68
FAM160B2	GABBR1	940	654	816	914	878	0.197	10.31	11.85	10.49	14.65	10.30	9.60	10.83	12.27	10.75	10.06
ATP5J	GABPA	790	537	845	909	396	0.482	9.74	9.80	11.36	8.82	11.91	10.14	10.12	9.86	12.56	10.26
C21orf33	GABPA	713	616	742	863	126	0.441	11.06	9.80	11.96	8.82	13.57	10.14	11.08	9.86	12.80	10.26
ABCF2	GABPB1	866	846	902	848	916	0.001	10.66	9.74	11.35	6.98	10.03	9.05	10.65	8.86	12.40	9.01
BOP1	GABPB1	542	656	790	738	850	0.139	8.23	9.74	6.79	6.98	6.88	9.05	6.09	8.86	9.38	9.01
BYSL	GABPB1	627	802	944	820	978	0.105	8.50	9.74	7.59	6.98	8.72	9.05	7.87	8.86	10.13	9.01
CDK16	GABPB1	646	518	961	956	800	0.452	11.63	9.74	13.02	6.98	11.03	9.05	11.75	8.86	12.96	9.01
CLN6	GABPB1	693	753	691	436	873	0.000	10.44	9.74	9.50	6.98	10.21	9.05	9.57	8.86	9.88	9.01
CMC2	GABPB1	722	859	924	961	550	0.395	8.88	9.74	10.09	6.98	9.61	9.05	8.51	8.86	9.74	9.01
EXOSC4	GABPB1	458	653	918	673	796	0.097	10.59	9.74	7.95	6.98	8.96	9.05	7.52	8.86	8.42	9.01
CDCA4	GADD45GIP1	836	519	881	963	799	0.408	8.56	10.03	4.77	10.36	6.78	10.52	6.79	9.45	6.31	11.05
AK2	GALE	964	608	935	948	922	0.190	11.59	9.35	10.23	9.28	12.60	11.48	11.53	9.67	11.78	7.74
ATIC	GALE	886	864	548	988	821	0.416	10.39	9.35	10.72	9.28	10.81	11.48	10.26	9.67	11.27	7.74
DPAGT1	GALE	927	939	214	923	981	0.211	10.00	9.35	9.41	9.28	10.84	11.48	10.00	9.67	9.32	7.74
BMP1	GALNT2	43	574	2	598	744	0.110	8.85	11.49	9.37	10.54	11.78	13.07	11.50	11.43	10.18	12.23
BOP1	GART	814	690	1000	986	999	0.234	8.23	10.20	6.79	9.68	6.88	10.65	6.09	10.40	9.38	10.99
EXOSC4	GART	342	720	970	967	954	0.363	10.59	10.20	7.95	9.68	8.96	10.65	7.52	10.40	8.42	10.99
ACAT1	GAS5	828	711	87	749	12	0.268	9.64	10.47	10.70	10.44	14.36	11.25	10.77	12.07	13.55	10.80
ADCK3	GAS5	284	478	622	685	82	0.309	11.12	10.47	10.84	10.44	12.86	11.25	10.46	12.07	15.54	10.80
CD320	GAS5	787	568	638	719	911	0.116	9.92	10.47	9.63	10.44	9.33	11.25	9.48	12.07	9.87	10.80
ARHGEF6	GAS6	617	262	522	894	109	0.719	11.94	9.58	10.49	11.63	8.77	11.81	11.28	13.26	11.80	12.58
CD4	GAS7	13	9	126	796	855	0.444	12.14	13.36	8.27	14.35	11.68	7.49	12.30	11.95	7.15	9.20
COL5A3	GAS7	37	29	311	518	642	0.027	7.76	13.36	12.54	14.35	10.47	7.49	11.11	11.95	10.78	9.20
APRT	GAS8	751	895	868	804	760	0.049	11.58	7.08	9.17	9.52	11.79	8.27	10.75	8.46	10.06	9.17
C19orf53	GATAD2A	732	846	949	923	876	0.158	10.93	12.62	10.82	10.68	10.85	11.47	10.50	11.92	11.30	11.06
COPE	GATAD2A	889	851	991	855	922	0.002	12.98	12.62	12.04	10.68	12.34	11.47	11.87	11.92	11.49	11.06
DDA1	GATAD2A	950	746	954	929	896	0.108	10.79	12.62	11.26	10.68	10.27	11.47	10.26	11.92	10.29	11.06
CABLES1	GATAD2B	646	48	642	186	533	0.000	6.43	12.12	11.89	10.99	9.34	10.52	9.38	11.28	7.16	11.44
ADSL	GCAT	109	922	76	992	783	0.631	10.59	7.68	9.07	9.53	10.19	10.69	9.86	7.04	12.92	9.20
BZW2	GCAT	300	816	19	819	845	0.321	9.81	7.68	9.33	9.53	9.12	10.69	9.84	7.04	12.65	9.20
AGK	GCC1	338	850	664	665	478	0.166	9.76	10.73	10.56	8.51	10.09	9.93	9.99	9.04	9.39	9.46
ABCF2	GCLM	546	752	731	955	862	0.465	10.66	10.19	11.35	8.86	10.03	10.67	10.65	9.37	12.40	10.73
ECE1	GDI1	854	317	908	923	938	0.254	13.32	13.37	11.33	15.79	12.72	12.15	13.60	13.35	11.08	11.96
FAM3A	GDI1	840	905	837	913	997	0.079	10.84	13.37	10.91	15.79	11.59	12.15	10.48	13.35	10.57	11.96
C20orf27	GEMIN6	830	867	935	982	914	0.191	11.03	7.90	10.46	7.38	9.43	8.81	9.28	6.74	9.49	8.14
CCNF	GEMIN6	246	967	934	860	869	0.180	8.36	7.90	7.84	7.38	6.71	8.81	6.33	6.74	7.60	8.14
EPB41L2	GFOD1	559	578	92	669	349	0.270	8.91	10.38	12.59	12.07	10.15	10.03	12.95	10.91	10.64	11.02
FAM53B	GFOD1	682	462	354	874	167	0.657	11.83	10.38	11.30	12.07	9.03	10.03	10.60	10.91	12.42	11.02
ALDH2	GGA2	230	93	473	966	651	0.857	12.31	11.74	14.12	11.53	15.62	11.53	13.79	12.79	13.17	11.87
GAB1	GGA2	128	424	895	861	275	0.541	9.52	11.74	10.42	11.53	9.47	11.53	10.76	12.79	10.18	11.87
CCNF	GGCT	623	953	893	870	460	0.308	8.36	8.48	7.84	10.15	6.71	9.51	6.33	9.28	7.60	9.53
APOE	GGTA1P	342	597	321	543	758	0.043	8.26	8.62	14.36	8.03	16.57	6.10	12.62	7.50	8.73	7.13
C19orf59	GGTA1P	84	75	515	183	23	0.000	13.16	8.62	2.26	8.03	4.81	6.10	10.23	7.50	3.80	7.13
CTSB	GGTA1P	260	331	789	124	242	0.000	14.59	8.62	14.05	8.03	14.91	6.10	15.69	7.50	13.53	7.13
CTSD	GGTA1P	290	451	777	288	197	0.000	15.56	8.62	13.77	8.03	15.00	6.10	15.94	7.50	14.40	7.13
CYB561A3	GGTA1P	356	335	455	667	630	0.269	10.92	8.62	8.67	8.03	10.60	6.10	10.33	7.50	10.53	7.13
EVL	GGTA1P	386	218	360	815	627	0.567	12.73	8.62	13.78	8.03	12.91	6.10	12.35	7.50	10.51	7.13
GAS5	GHITM	308	580	248	870	245	0.700	10.47	12.66	10.44	13.56	11.25	13.46	12.07	12.40	10.80	13.73
ACP2	GIT2	562	889	744	945	976	0.320	10.17	12.43	10.30	11.20	12.20	10.65	10.28	11.16	9.52	10.79
AK1	GJB1	0	284	42	718	0	0.000	10.63	3.11	11.71	7.86	10.92	13.76	11.47	2.71	13.90	1.73
BTD	GLB1	940	807	964	985	894	0.168	9.28	11.23	7.18	9.16	10.43	10.86	8.15	10.65	8.63	8.96
CAPN3	GLCCI1	581	64	823	894	253	0.586	10.90	9.76	10.87	9.41	11.03	8.68	10.84	9.53	14.61	8.29
C9orf40	GLE1	555	892	883	757	927	0.101	8.28	10.95	8.04	9.22	7.35	10.18	6.29	9.59	7.77	10.72
CKS1B	GLE1	178	655	986	785	764	0.218	7.72	10.95	5.80	9.22	8.94	10.18	7.23	9.59	7.10	10.72
ARHGEF40	GLI3	7	792	279	831	757	0.388	12.31	4.78	10.53	8.04	12.32	5.65	11.68	9.18	10.77	8.04
C11orf95	GLI3	564	133	240	898	802	0.613	7.67	4.78	10.91	8.04	10.18	5.65	9.46	9.18	9.89	8.04
COL18A1	GLI3	29	175	254	705	926	0.307	11.97	4.78	10.21	8.04	15.08	5.65	13.12	9.18	10.94	8.04
APOE	GLIPR1	3	13	319	352	792	0.000	8.26	12.19	14.36	8.05	16.57	7.99	12.62	9.98	8.73	7.33
FGD2	GLIPR1	831	271	741	522	918	0.011	11.82	12.19	6.05	8.05	8.24	7.99	10.56	9.98	7.26	7.33
ABI3	GLIPR2	23	650	971	880	899	0.305	11.43	13.44	5.16	8.00	7.26	7.51	9.24	11.39	6.96	8.06
ESYT1	GLIPR2	64	377	665	920	733	0.641	11.83	13.44	11.05	8.00	12.42	7.51	12.45	11.39	11.90	8.06
APOE	GLRX	7	24	171	480	23	0.000	8.26	11.63	14.36	9.51	16.57	11.75	12.62	10.95	8.73	13.06
ARHGEF6	GLRX	814	318	465	156	1	0.000	11.94	11.63	10.49	9.51	8.77	11.75	11.28	10.95	11.80	13.06
GGTA1P	GLRX	350	39	528	83	72	0.000	8.62	11.63	8.03	9.51	6.10	11.75	7.50	10.95	7.13	13.06
CDCA4	GLRX5	188	573	703	982	670	0.741	8.56	11.37	4.77	10.61	6.78	11.38	6.79	9.48	6.31	11.56
CDK4	GLRX5	226	662	841	989	502	0.726	9.61	11.37	8.57	10.61	9.68	11.38	10.22	9.48	9.93	11.56
CSE1L	GLRX5	172	874	938	986	280	0.566	10.35	11.37	10.96	10.61	10.78	11.38	10.85	9.48	11.76	11.56
ESAM	GLS	158	61	913	850	963	0.350	9.49	11.04	9.85	12.80	9.21	9.64	13.19	12.55	10.52	10.56
EFEMP2	GLT8D1	832	329	445	815	635	0.405	9.81	10.07	10.23	10.11	9.16	11.06	11.74	10.36	9.95	9.78
C1orf162	GLUL	73	409	618	787	512	0.509	13.64	16.05	7.02	17.85	8.88	14.08	10.81	16.28	8.91	16.03
CYBA	GLUL	43	556	452	672	13	0.316	14.56	16.05	7.36	17.85	9.97	14.08	12.31	16.28	8.55	16.03
FCER1G	GLUL	37	555	411	835	553	0.616	14.99	16.05	5.78	17.85	8.80	14.08	11.95	16.28	7.30	16.03
ACP2	GMFG	316	270	716	854	782	0.459	10.17	13.33	10.30	6.14	12.20	8.21	10.28	10.84	9.52	7.39
BCL6B	GMFG	6	543	978	320	605	0.000	4.76	13.33	6.88	6.14	7.47	8.21	10.71	10.84	8.64	7.39
CCHCR1	GMNN	735	626	941	909	585	0.391	9.73	8.00	9.30	8.02	9.44	8.70	8.94	7.41	10.08	7.73
CHTF18	GMNN	634	449	874	823	595	0.370	9.64	8.00	9.11	8.02	8.50	8.70	8.63	7.41	8.32	7.73
E2F1	GMNN	635	91	903	865	495	0.480	9.19	8.00	8.23	8.02	5.88	8.70	7.10	7.41	7.02	7.73
EIF4EBP1	GMNN	677	584	819	798	620	0.257	10.27	8.00	5.74	8.02	10.68	8.70	9.06	7.41	10.77	7.73
FARSB	GMNN	833	199	753	758	706	0.158	9.69	8.00	10.92	8.02	10.10	8.70	9.67	7.41	11.28	7.73
FKBPL	GMNN	400	184	844	896	861	0.440	8.65	8.00	6.28	8.02	7.23	8.70	5.83	7.41	7.32	7.73
C20orf27	GMPS	343	734	562	749	708	0.246	11.03	10.35	10.46	10.20	9.43	9.93	9.28	10.53	9.49	10.51
CDCA4	GMPS	986	732	949	900	742	0.163	8.56	10.35	4.77	10.20	6.78	9.93	6.79	10.53	6.31	10.51
E2F2	GMPS	522	121	814	578	412	0.106	10.89	10.35	1.27	10.20	4.49	9.93	5.81	10.53	3.07	10.51
ESYT1	GNAI2	341	575	962	902	841	0.395	11.83	15.75	11.05	13.18	12.42	13.08	12.45	14.63	11.90	11.86
AK1	GNAQ	2	616	693	843	122	0.531	10.63	12.03	11.71	12.72	10.92	10.87	11.47	12.41	13.90	10.69
CACNA2D2	GNAQ	8	644	587	715	341	0.315	8.53	12.03	9.49	12.72	5.92	10.87	11.55	12.41	7.82	10.69
FYCO1	GNAQ	523	377	973	964	72	0.684	10.01	12.03	9.16	12.72	10.50	10.87	11.37	12.41	13.90	10.69
DYSF	GNG2	286	45	286	551	436	0.102	14.81	12.13	9.96	10.78	11.29	7.63	11.88	8.88	13.26	7.29
CCDC86	GNPNAT1	819	950	697	993	916	0.295	8.66	7.19	8.09	6.79	8.38	10.26	7.98	7.43	9.88	8.76
DDX54	GNPNAT1	703	891	920	916	809	0.172	10.82	7.19	9.82	6.79	10.83	10.26	10.70	7.43	11.88	8.76
ERBB2	GOLGA2	729	74	352	909	504	0.702	9.14	11.20	9.47	11.39	11.38	11.73	12.06	11.95	10.91	11.59
AP3M2	GOLGA7	153	556	838	888	776	0.441	9.51	11.58	11.41	11.20	8.40	10.53	10.06	10.24	9.31	10.15
FAM63A	GOLPH3L	776	217	726	971	989	0.456	11.72	9.38	9.16	8.53	10.01	9.18	9.49	9.15	10.03	9.65
CTDSPL	GORASP1	405	849	405	974	172	0.773	9.18	11.14	10.62	11.36	10.65	11.58	11.52	11.59	10.37	11.02
EIF4EBP1	GOT2	776	74	326	956	16	0.774	10.27	10.41	5.74	12.42	10.68	13.65	9.06	10.73	10.77	14.04
BTF3L4	GPATCH3	887	893	967	956	935	0.076	9.93	9.84	10.37	8.49	9.80	8.76	9.78	7.93	11.22	9.67
DHDDS	GPATCH3	1000	974	993	999	979	0.025	10.11	9.84	10.39	8.49	10.20	8.76	9.79	7.93	9.71	9.67
EML4	GPCPD1	887	753	644	958	693	0.427	11.52	13.13	9.12	11.10	12.15	10.29	12.29	12.80	9.13	11.02
ALDH3B1	GPD1L	238	28	856	978	217	0.778	11.94	9.40	5.99	11.02	7.87	7.49	11.59	10.99	7.26	13.46
CACNA2D2	GPD1L	795	884	547	918	595	0.425	8.53	9.40	9.49	11.02	5.92	7.49	11.55	10.99	7.82	13.46
CADM1	GPD1L	737	394	598	910	229	0.652	6.96	9.40	11.53	11.02	10.54	7.49	11.34	10.99	8.66	13.46
CERS2	GPD1L	733	222	753	953	157	0.663	11.73	9.40	10.11	11.02	13.35	7.49	12.00	10.99	9.89	13.46
CYB5A	GPD1L	543	621	600	983	500	0.834	8.87	9.40	8.50	11.02	14.50	7.49	12.26	10.99	8.86	13.46
EPHX1	GPD1L	762	3	52	810	105	0.489	9.02	9.40	12.02	11.02	15.05	7.49	12.35	10.99	12.04	13.46
ERBB2	GPD1L	832	23	112	966	461	0.766	9.14	9.40	9.47	11.02	11.38	7.49	12.06	10.99	10.91	13.46
FAXDC2	GPD1L	78	105	38	913	422	0.826	11.01	9.40	10.92	11.02	12.04	7.49	11.36	10.99	9.41	13.46
COL7A1	GPI	28	722	60	258	284	0.000	8.62	13.03	10.81	14.71	8.46	13.66	9.06	12.81	10.15	13.98
ARL6IP6	GPN1	645	439	693	980	827	0.627	9.89	10.27	8.03	9.64	8.05	9.43	8.71	9.53	8.59	10.37
C19orf48	GPN1	876	691	462	976	838	0.499	9.78	10.27	7.96	9.64	10.20	9.43	8.88	9.53	8.59	10.37
CIRBP	GPR108	918	432	323	846	648	0.445	13.12	12.41	13.98	10.43	13.37	11.07	14.05	11.10	13.45	9.91
ARHGAP25	GPR155	966	627	554	841	299	0.421	13.28	10.58	6.44	10.71	8.31	9.38	10.21	8.10	7.50	9.50
GM2A	GPR155	771	248	921	376	687	0.000	11.92	10.58	10.46	10.71	9.97	9.38	11.15	8.10	8.86	9.50
FGD2	GPX1	406	598	750	909	626	0.581	11.82	13.80	6.05	11.51	8.24	13.18	10.56	12.85	7.26	11.27
FGD2	GRB2	872	442	909	809	741	0.189	11.82	12.88	6.05	11.13	8.24	10.55	10.56	11.21	7.26	10.90
ESYT1	GRN	126	876	925	883	934	0.195	11.83	14.41	11.05	10.49	12.42	12.21	12.45	14.41	11.90	11.40
ATP11A	GSE1	112	402	834	892	711	0.511	11.64	10.30	10.03	10.87	10.95	11.60	12.72	12.14	10.74	12.24
CABLES1	GSE1	791	11	675	942	349	0.651	6.43	10.30	11.89	10.87	9.34	11.60	9.38	12.14	7.16	12.24
GAS8	GSE1	614	896	920	939	311	0.413	7.08	10.30	9.52	10.87	8.27	11.60	8.46	12.14	9.17	12.24
CLEC16A	GSPT1	236	951	958	988	995	0.278	10.70	12.38	11.21	11.61	10.75	11.97	10.74	12.26	11.02	13.14
C7orf43	GSTK1	958	787	104	916	490	0.480	11.76	13.03	10.01	10.85	9.98	13.54	9.67	12.19	8.67	11.78
FMNL1	GSTK1	852	650	453	669	740	0.094	14.54	13.03	11.04	10.85	8.82	13.54	12.03	12.19	8.26	11.78
AOAH	GSTO1	711	568	638	453	482	0.000	12.91	12.05	4.85	11.05	7.34	13.09	8.81	11.93	4.97	11.24
CORO1C	GSTO1	811	938	852	897	524	0.252	12.04	12.05	11.17	11.05	11.44	13.09	13.02	11.93	11.37	11.24
DUSP7	GSTO1	672	900	659	887	29	0.415	10.29	12.05	11.16	11.05	8.56	13.09	11.10	11.93	10.60	11.24
GSTA4	GSTP1	661	112	286	872	434	0.663	6.30	12.35	10.87	11.89	9.01	9.64	10.00	13.80	9.34	12.58
C14orf169	GSTZ1	101	108	96	50	47	0.000	0.00	8.78	0.00	8.02	0.00	11.80	0.00	7.01	0.00	9.99
C21orf91	GTDC1	946	464	703	902	804	0.349	9.55	10.77	7.59	11.50	8.42	8.13	8.66	9.40	8.42	9.55
AP2M1	GTF2E1	492	828	995	924	891	0.277	13.46	8.61	14.96	7.36	12.91	8.10	13.65	7.37	12.83	8.83
ACP1	GTF3C2	666	930	936	996	916	0.268	10.60	10.67	11.17	10.07	11.47	10.38	10.94	10.56	11.32	10.73
AGBL5	GTF3C2	884	948	836	929	883	0.092	9.48	10.67	9.46	10.07	8.76	10.38	9.00	10.56	9.01	10.73
CEBPZOS	GTF3C2	101	108	96	50	47	0.000	0.00	10.67	0.00	10.07	0.00	10.38	0.00	10.56	0.00	10.73
CLN6	GTF3C2	961	940	919	971	943	0.060	10.44	10.67	9.50	10.07	10.21	10.38	9.57	10.56	9.88	10.73
COX7A2L	GTF3C2	787	912	860	975	920	0.210	11.06	10.67	11.43	10.07	11.41	10.38	10.79	10.56	10.88	10.73
FBXO22	GTF3C2	929	989	844	927	950	0.042	8.95	10.67	8.35	10.07	9.85	10.38	8.67	10.56	9.40	10.73
APTX	GTF3C5	992	909	987	988	1000	0.040	9.44	11.37	9.32	11.01	10.11	10.99	9.26	10.84	9.31	11.44
CAMSAP1	GTF3C5	859	761	852	977	953	0.241	9.52	11.37	11.59	11.01	9.52	10.99	10.25	10.84	12.39	11.44
CKS1B	GTF3C5	574	691	889	847	881	0.214	7.72	11.37	5.80	11.01	8.94	10.99	7.23	10.84	7.10	11.44
BYSL	GTSE1	577	333	523	439	337	0.000	8.50	7.44	7.59	2.67	8.72	4.54	7.87	4.58	10.13	3.86
CCT6A	GTSE1	471	468	624	575	417	0.113	11.14	7.44	11.85	2.67	11.72	4.54	12.04	4.58	12.86	3.86
DNAJC9	GTSE1	831	448	648	675	544	0.167	8.39	7.44	8.43	2.67	7.86	4.54	7.47	4.58	8.46	3.86
E2F3	GTSE1	41	215	628	604	109	0.156	10.53	7.44	8.80	2.67	8.37	4.54	8.99	4.58	10.01	3.86
EBP	GTSE1	792	430	233	560	585	0.060	10.24	7.44	9.07	2.67	13.01	4.54	9.78	4.58	8.05	3.86
EMC9	GTSE1	842	341	534	413	385	0.000	8.73	7.44	8.59	2.67	9.14	4.54	7.64	4.58	9.60	3.86
EPT1	GTSE1	729	381	234	356	284	0.000	8.79	7.44	10.37	2.67	11.34	4.54	9.83	4.58	10.43	3.86
FBXO45	GTSE1	274	358	491	536	102	0.072	8.37	7.44	10.24	2.67	8.70	4.54	7.90	4.58	10.25	3.86
FEN1	GTSE1	927	352	815	870	330	0.398	9.00	7.44	8.83	2.67	8.55	4.54	7.55	4.58	9.42	3.86
FIGNL1	GTSE1	662	433	649	738	362	0.321	7.10	7.44	7.78	2.67	7.89	4.54	6.90	4.58	8.27	3.86
FKBP3	GTSE1	432	391	689	644	65	0.216	9.26	7.44	11.15	2.67	10.16	4.54	9.10	4.58	12.37	3.86
GMNN	GTSE1	796	479	848	816	481	0.326	8.00	7.44	8.02	2.67	8.70	4.54	7.41	4.58	7.73	3.86
ATP6V1E1	GUCD1	934	564	816	996	788	0.441	12.33	12.28	13.63	10.25	11.12	13.34	12.27	11.73	12.65	12.85
C14orf28	GUCY1A3	509	639	596	792	846	0.316	7.24	6.77	6.57	8.59	8.27	8.17	7.02	9.91	7.42	8.44
CYP2U1	GUCY1A3	656	637	536	952	855	0.562	7.50	6.77	9.03	8.59	8.85	8.17	8.28	9.91	8.84	8.44
FXYD1	GUCY1A3	245	18	134	332	611	0.000	6.66	6.77	11.46	8.59	12.00	8.17	9.40	9.91	13.11	8.44
FYCO1	GUCY1A3	537	189	690	821	683	0.437	10.01	6.77	9.16	8.59	10.50	8.17	11.37	9.91	13.90	8.44
ABCC3	GUSB	490	463	819	839	926	0.349	10.18	11.74	5.37	9.61	14.13	12.29	11.09	11.43	5.97	9.89
DNAJC30	GUSB	791	308	895	918	825	0.331	8.01	11.74	8.89	9.61	9.05	12.29	6.91	11.43	8.67	9.89
APOE	GUSBP11	0	0	0	0	0	0.000	8.26	0.00	14.36	0.00	16.57	0.00	12.62	0.00	8.73	0.00
GRWD1	GYS1	792	742	212	957	42	0.647	9.56	11.42	9.19	10.61	10.37	10.10	9.51	10.58	10.65	14.00
AAGAB	H2AFX	708	439	824	826	719	0.277	10.37	10.14	10.56	10.44	9.88	8.91	10.01	8.92	10.92	9.10
ATP13A3	H2AFX	159	504	650	328	678	0.000	11.09	10.14	10.35	10.44	12.83	8.91	12.31	8.92	11.02	9.10
APOE	H2AFY	30	105	289	678	455	0.356	8.26	13.38	14.36	11.42	16.57	11.16	12.62	12.68	8.73	11.90
GTSE1	H2AFZ	75	442	907	684	363	0.276	7.44	12.20	2.67	11.60	4.54	10.48	4.58	11.74	3.86	11.06
GNPTG	H6PD	896	671	623	859	632	0.326	10.76	11.75	11.36	10.18	11.28	14.24	10.53	12.65	10.19	13.02
ADAM19	HAPLN3	128	145	573	964	18	0.891	12.45	9.91	8.38	6.47	9.65	5.65	10.55	9.15	8.32	9.00
AOAH	HAPLN3	476	222	685	454	522	0.000	12.91	9.91	4.85	6.47	7.34	5.65	8.81	9.15	4.97	9.00
ARID5A	HAPLN3	221	901	479	963	722	0.615	13.47	9.91	9.57	6.47	10.93	5.65	11.97	9.15	10.62	9.00
ATF5	HAPLN3	605	443	237	147	547	0.000	10.05	9.91	8.60	6.47	16.12	5.65	9.16	9.15	9.91	9.00
C1orf54	HAPLN3	813	668	594	507	216	0.004	6.17	9.91	6.78	6.47	6.32	5.65	7.28	9.15	7.21	9.00
CTSB	HAPLN3	138	480	464	47	745	0.000	14.59	9.91	14.05	6.47	14.91	5.65	15.69	9.15	13.53	9.00
EFHD2	HAPLN3	246	313	498	686	934	0.279	14.65	9.91	12.49	6.47	10.79	5.65	12.04	9.15	8.61	9.00
ETV6	HAPLN3	402	831	788	875	754	0.314	12.27	9.91	8.78	6.47	10.00	5.65	11.12	9.15	9.53	9.00
FNDC3B	HAPLN3	215	899	664	733	698	0.169	11.71	9.91	7.58	6.47	11.99	5.65	12.19	9.15	11.58	9.00
BTBD1	HAUS2	979	996	1000	995	824	0.093	10.44	9.20	11.99	8.12	10.71	8.31	10.91	8.58	13.94	9.11
ATF7	HAX1	804	490	802	730	834	0.115	10.85	11.05	9.68	11.02	10.22	11.39	11.17	10.61	10.96	12.15
BHLHE40	HBEGF	995	423	863	834	524	0.322	12.18	9.05	12.40	8.46	13.53	7.15	13.49	11.14	13.85	10.08
ABCF1	HCG18	979	958	824	971	963	0.084	11.11	9.77	10.97	9.52	11.49	9.08	11.57	9.45	12.82	9.36
CYLD	HCG26	0	0	0	0	0	0.000	12.02	0.00	11.09	0.00	10.70	0.00	11.44	0.00	11.98	0.00
FNBP1	HCG26	0	0	0	0	0	0.000	12.67	0.00	12.19	0.00	10.58	0.00	11.71	0.00	11.06	0.00
ACOT7	HDAC1	491	13	742	874	874	0.440	8.95	12.05	12.56	9.64	9.34	11.54	9.09	11.65	7.77	9.87
CDCA4	HDAC2	781	795	964	967	888	0.220	8.56	10.62	4.77	10.52	6.78	10.16	6.79	11.01	6.31	11.22
CHAF1A	HDAC2	545	859	912	819	788	0.152	9.43	10.62	8.20	10.52	7.93	10.16	7.87	11.01	9.76	11.22
ARPC5L	HDGF	479	710	807	988	982	0.476	10.88	13.20	11.60	12.30	10.90	13.58	10.85	13.07	11.00	13.43
CCT3	HDGF	716	965	900	836	912	0.060	11.84	13.20	12.29	12.30	12.53	13.58	12.15	13.07	12.75	13.43
DIEXF	HDGF	394	805	676	245	878	0.000	9.01	13.20	8.79	12.30	9.61	13.58	8.34	13.07	9.23	13.43
DPH2	HDGF	577	755	694	791	917	0.173	9.68	13.20	9.57	12.30	9.74	13.58	9.04	13.07	10.95	13.43
E2F3	HDGF	33	526	567	910	932	0.569	10.53	13.20	8.80	12.30	8.37	13.58	8.99	13.07	10.01	13.43
ENSA	HDGF	594	587	987	936	984	0.345	12.38	13.20	13.42	12.30	12.29	13.58	12.68	13.07	13.20	13.43
GPATCH4	HDGF	584	623	705	725	968	0.132	9.39	13.20	10.09	12.30	9.77	13.58	9.35	13.07	11.51	13.43
GTPBP4	HDGF	496	889	741	910	956	0.300	9.93	13.20	9.73	12.30	10.12	13.58	10.37	13.07	11.54	13.43
COA6	HEATR1	723	806	814	926	828	0.267	8.37	9.40	8.80	8.59	8.48	9.47	6.97	9.81	10.03	10.08
C7orf50	HEATR2	748	408	435	943	928	0.548	9.97	8.69	11.56	8.82	10.34	9.43	10.22	9.13	10.52	10.37
FBXL18	HEATR2	755	297	954	958	318	0.561	8.56	8.69	8.28	8.82	6.43	9.43	6.18	9.13	8.22	10.37
FBXL20	HEATR6	653	869	846	902	829	0.205	9.47	8.99	6.56	8.91	7.66	8.47	6.79	8.94	7.87	9.29
FOXJ2	HEBP1	494	779	900	949	878	0.369	11.24	10.20	9.80	9.47	9.58	11.56	10.85	10.56	11.65	9.95
CSTF2	HEBP2	601	342	833	814	873	0.264	8.62	11.77	7.77	8.87	7.60	11.97	7.60	10.73	7.99	12.07
HDAC2	HEBP2	946	240	887	949	980	0.257	10.62	11.77	10.52	8.87	10.16	11.97	11.01	10.73	11.22	12.07
FAM43A	HECA	623	714	692	232	24	0.000	8.81	12.22	8.09	10.30	7.61	9.84	9.18	11.54	8.38	11.29
GALE	HECTD3	885	966	932	899	893	0.010	9.35	11.24	9.28	10.87	11.48	11.99	9.67	10.99	7.74	11.61
GNPTG	HECTD3	978	934	935	997	975	0.083	10.76	11.24	11.36	10.87	11.28	11.99	10.53	10.99	10.19	11.61
CCDC152	HECTD4	761	394	653	740	888	0.164	5.31	10.94	5.28	13.08	8.83	11.46	5.91	11.74	5.99	11.53
ADARB1	HEG1	947	38	793	767	555	0.239	9.95	9.15	11.09	10.18	9.64	9.12	12.56	13.23	10.70	10.30
FAM65A	HEG1	755	147	966	940	664	0.451	11.51	9.15	12.35	10.18	10.62	9.12	12.71	13.23	11.34	10.30
GAS6	HEG1	276	190	462	761	329	0.522	9.58	9.15	11.63	10.18	11.81	9.12	13.26	13.23	12.58	10.30
GGTA1P	HERPUD1	427	310	398	380	356	0.000	8.62	12.09	8.03	11.30	6.10	13.12	7.50	12.75	7.13	12.22
FZD3	HES6	547	107	351	680	42	0.337	6.92	8.68	10.41	10.21	6.69	7.66	6.82	6.65	8.36	8.90
APOE	HEXB	37	147	603	701	327	0.350	8.26	11.77	14.36	9.39	16.57	11.45	12.62	12.18	8.73	10.52
BTD	HEXB	852	738	922	966	671	0.341	9.28	11.77	7.18	9.39	10.43	11.45	8.15	12.18	8.63	10.52
C2	HEXB	418	886	999	944	581	0.432	8.88	11.77	6.16	9.39	14.70	11.45	11.67	12.18	7.04	10.52
FAM78A	HEXB	900	728	842	747	22	0.133	11.43	11.77	9.03	9.39	7.00	11.45	9.04	12.18	10.25	10.52
FGD2	HEXB	922	430	944	774	791	0.137	11.82	11.77	6.05	9.39	8.24	11.45	10.56	12.18	7.26	10.52
CSRP1	HEYL	471	734	869	760	927	0.143	11.35	4.86	14.70	7.41	12.49	8.23	14.76	11.16	11.20	9.05
AGPAT6	HGSNAT	785	814	291	902	374	0.504	12.03	11.60	10.91	11.20	11.92	11.63	11.42	12.10	12.02	10.77
COLGALT1	HIATL1	971	585	986	875	966	0.145	12.94	11.37	10.47	9.93	11.53	9.54	12.70	11.19	10.77	9.78
HAPLN3	HIF1A	404	748	786	780	843	0.156	9.91	13.10	6.47	10.92	5.65	11.19	9.15	13.28	9.00	10.20
ATP13A3	HILPDA	132	439	311	409	542	0.000	11.09	10.17	10.35	8.27	12.83	8.30	12.31	8.80	11.02	7.31
CD40	HIVEP3	899	61	873	924	569	0.427	9.40	8.90	6.30	9.75	9.22	7.64	10.51	9.52	8.76	8.11
CD83	HIVEP3	969	866	852	615	488	0.058	9.32	8.90	9.58	9.75	6.71	7.64	10.07	9.52	6.43	8.11
CYLD	HIVEP3	548	854	974	752	141	0.228	12.02	8.90	11.09	9.75	10.70	7.64	11.44	9.52	11.98	8.11
CD6	HLA-B	519	16	851	737	658	0.267	11.48	17.85	5.64	11.69	6.39	13.79	8.00	16.61	4.34	12.43
CD6	HLA-C	152	94	381	343	368	0.000	11.48	17.12	5.64	11.47	6.39	13.66	8.00	15.67	4.34	11.94
BTD	HLA-DMA	806	541	586	803	435	0.391	9.28	11.56	7.18	6.73	10.43	8.90	8.15	12.02	8.63	8.66
CISH	HLA-DMA	521	531	153	497	135	0.000	10.79	11.56	4.33	6.73	11.06	8.90	10.54	12.02	10.12	8.66
CYB5R1	HLA-DMA	65	377	550	764	650	0.428	11.39	11.56	10.52	6.73	11.03	8.90	11.11	12.02	14.25	8.66
CYP27A1	HLA-DMA	487	565	570	948	141	0.829	10.83	11.56	10.07	6.73	14.61	8.90	12.12	12.02	10.70	8.66
GLCCI1	HLA-DMA	389	199	821	806	782	0.318	9.76	11.56	9.41	6.73	8.68	8.90	9.53	12.02	8.29	8.66
GLUL	HLA-DMA	628	347	471	384	13	0.000	16.05	11.56	17.85	6.73	14.08	8.90	16.28	12.02	16.03	8.66
AMDHD2	HLA-DMB	723	140	789	755	910	0.143	10.29	11.24	8.26	5.70	8.73	7.71	8.57	11.23	8.36	7.73
APOE	HLA-DMB	259	81	633	867	888	0.484	8.26	11.24	14.36	5.70	16.57	7.71	12.62	11.23	8.73	7.73
CYP27A1	HLA-DMB	545	344	501	965	186	0.907	10.83	11.24	10.07	5.70	14.61	7.71	12.12	11.23	10.70	7.73
GLRX	HLA-DMB	119	364	547	395	49	0.000	11.63	11.24	9.51	5.70	11.75	7.71	10.95	11.23	13.06	7.73
GLUL	HLA-DMB	424	278	495	337	10	0.000	16.05	11.24	17.85	5.70	14.08	7.71	16.28	11.23	16.03	7.73
ACP2	HLA-DOA	577	258	399	555	427	0.083	10.17	10.15	10.30	4.67	12.20	6.87	10.28	9.91	9.52	6.18
ATP6V0D1	HLA-DOA	62	214	378	514	555	0.021	13.64	10.15	12.71	4.67	11.55	6.87	12.10	9.91	12.12	6.18
ATP6V0E1	HLA-DOA	30	330	425	434	216	0.000	13.70	10.15	10.28	4.67	12.07	6.87	12.66	9.91	11.79	6.18
CREBL2	HLA-DOA	824	307	574	749	708	0.233	10.34	10.15	11.30	4.67	11.21	6.87	10.87	9.91	9.68	6.18
CYLD	HLA-DOA	696	579	635	669	218	0.146	12.02	10.15	11.09	4.67	10.70	6.87	11.44	9.91	11.98	6.18
CYP27A1	HLA-DOA	299	311	569	747	133	0.460	10.83	10.15	10.07	4.67	14.61	6.87	12.12	9.91	10.70	6.18
DAB2	HLA-DOA	337	703	804	478	749	0.000	10.19	10.15	7.96	4.67	9.53	6.87	12.96	9.91	10.09	6.18
GLRX	HLA-DOA	38	541	341	232	62	0.000	11.63	10.15	9.51	4.67	11.75	6.87	10.95	9.91	13.06	6.18
HERPUD1	HLA-DOA	567	476	405	446	605	0.000	12.09	10.15	11.30	4.67	13.12	6.87	12.75	9.91	12.22	6.18
ACP2	HLA-DPA1	656	94	453	525	298	0.037	10.17	12.85	10.30	8.10	12.20	10.06	10.28	13.95	9.52	9.82
CYP27A1	HLA-DPB1	306	412	353	782	117	0.564	10.83	12.12	10.07	7.57	14.61	9.30	12.12	12.84	10.70	8.93
DNASE2	HLA-DPB1	391	542	564	657	436	0.261	11.01	12.12	8.86	7.57	10.24	9.30	10.32	12.84	9.47	8.93
GLRX	HLA-DPB1	6	495	466	368	20	0.000	11.63	12.12	9.51	7.57	11.75	9.30	10.95	12.84	13.06	8.93
CTSD	HLA-DRA	332	389	824	852	291	0.542	15.56	14.02	13.77	8.60	15.00	10.90	15.94	15.51	14.40	10.70
CYFIP2	HLA-DRA	721	130	101	792	257	0.473	13.30	14.02	14.10	8.60	10.95	10.90	10.57	15.51	9.29	10.70
CYP27A1	HLA-DRA	414	477	315	893	130	0.786	10.83	14.02	10.07	8.60	14.61	10.90	12.12	15.51	10.70	10.70
EMC3	HLA-DRA	136	290	772	665	249	0.247	12.01	14.02	10.63	8.60	10.85	10.90	10.46	15.51	12.37	10.70
ALDH2	HLA-DRB6	135	159	241	309	175	0.000	12.31	7.83	14.12	1.71	15.62	4.30	13.79	6.79	13.17	4.83
CISH	HLA-DRB6	231	177	105	297	150	0.000	10.79	7.83	4.33	1.71	11.06	4.30	10.54	6.79	10.12	4.83
CYFIP2	HLA-DRB6	305	80	182	249	84	0.000	13.30	7.83	14.10	1.71	10.95	4.30	10.57	6.79	9.29	4.83
CYP27A1	HLA-DRB6	221	123	227	396	103	0.000	10.83	7.83	10.07	1.71	14.61	4.30	12.12	6.79	10.70	4.83
GLCCI1	HLA-DRB6	199	34	225	144	197	0.000	9.76	7.83	9.41	1.71	8.68	4.30	9.53	6.79	8.29	4.83
CASP10	HLA-G	376	179	653	368	0	0.000	11.46	7.58	6.76	1.15	9.44	2.89	10.46	5.81	8.28	2.91
GTSE1	HLTF	367	309	535	650	161	0.282	7.44	8.79	2.67	10.44	4.54	9.72	4.58	8.94	3.86	9.40
DCPS	HMBS	231	787	217	995	817	0.688	9.76	10.95	6.99	8.24	10.93	9.91	7.92	8.37	8.99	10.01
ATP13A3	HMCES	489	869	698	603	603	0.051	11.09	10.72	10.35	11.10	12.83	10.93	12.31	10.31	11.02	11.26
CRYM	HMGN3	151	214	579	862	236	0.684	5.86	9.15	11.89	10.79	8.20	10.98	5.16	10.66	5.09	10.71
CDCA4	HMGXB4	870	859	932	916	641	0.189	8.56	9.16	4.77	8.62	6.78	9.08	6.79	9.27	6.31	9.77
CHAF1A	HMGXB4	718	732	892	865	941	0.140	9.43	9.16	8.20	8.62	7.93	9.08	7.87	9.27	9.76	9.77
E2F1	HMGXB4	228	727	665	676	574	0.144	9.19	9.16	8.23	8.62	5.88	9.08	7.10	9.27	7.02	9.77
E2F2	HMGXB4	280	163	794	490	341	0.000	10.89	9.16	1.27	8.62	4.49	9.08	5.81	9.27	3.07	9.77
GTSE1	HMGXB4	442	443	630	560	331	0.090	7.44	9.16	2.67	8.62	4.54	9.08	4.58	9.27	3.86	9.77
HAPLN3	HMOX1	330	732	422	42	338	0.000	9.91	12.80	6.47	7.00	5.65	11.49	9.15	12.07	9.00	10.72
DHX37	HN1	122	798	998	949	210	0.524	9.92	12.51	9.03	10.72	9.58	9.27	9.34	9.83	10.78	10.96
COG7	HN1L	899	582	910	971	931	0.281	9.43	9.83	9.74	8.62	9.49	11.82	9.46	10.75	9.52	10.47
EZR	HN1L	456	12	882	768	860	0.268	12.59	9.83	12.26	8.62	11.71	11.82	14.02	10.75	11.44	10.47
GLYR1	HN1L	892	339	947	979	925	0.326	11.03	9.83	10.85	8.62	10.47	11.82	10.54	10.75	11.22	10.47
FYCO1	HNMT	464	551	690	683	202	0.249	10.01	9.06	9.16	8.41	10.50	11.87	11.37	9.89	13.90	7.84
CCNF	HNRNPAB	887	871	702	778	786	0.038	8.36	11.13	7.84	10.23	6.71	11.86	6.33	11.81	7.60	12.03
DIAPH1	HNRNPAB	872	895	902	918	999	0.043	13.41	11.13	11.41	10.23	13.46	11.86	13.05	11.81	13.85	12.03
GRK6	HNRNPAB	419	861	963	961	963	0.281	13.69	11.13	10.19	10.23	9.40	11.86	10.55	11.81	9.89	12.03
BABAM1	HOMER3	513	139	852	840	872	0.334	11.65	10.77	11.68	9.44	10.88	7.36	10.58	9.45	11.69	11.45
CDCA4	HOMER3	452	619	871	850	513	0.459	8.56	10.77	4.77	9.44	6.78	7.36	6.79	9.45	6.31	11.45
FAM220A	HOMER3	634	115	874	820	456	0.413	9.04	10.77	9.82	9.44	8.24	7.36	8.00	9.45	11.55	11.45
CNPY4	HOXB5	0	0	836	637	722	0.000	9.29	1.92	7.89	0.30	7.65	4.61	7.95	7.35	7.29	3.97
FAXDC2	HPCAL1	80	3	66	780	275	0.560	11.01	12.64	10.92	12.89	12.04	11.39	11.36	12.55	9.41	9.88
FCHO2	HPCAL1	474	525	838	871	200	0.560	10.27	12.64	9.13	12.89	9.90	11.39	11.20	12.55	10.36	9.88
FGD4	HPCAL1	597	146	182	775	61	0.501	11.46	12.64	9.14	12.89	10.75	11.39	10.76	12.55	10.84	9.88
APEX2	HPRT1	861	712	586	912	764	0.362	10.16	9.75	8.07	11.07	9.64	9.30	9.13	8.69	9.24	9.56
DDX39A	HPRT1	657	299	606	896	614	0.604	11.50	9.75	9.27	11.07	10.41	9.30	11.07	8.69	9.99	9.56
GLA	HPRT1	710	577	573	840	573	0.464	11.26	9.75	7.27	11.07	8.60	9.30	9.60	8.69	8.64	9.56
HILPDA	HPRT1	99	124	352	264	508	0.000	10.17	9.75	8.27	11.07	8.30	9.30	8.80	8.69	7.31	9.56
BLOC1S2	HPS1	302	940	968	968	961	0.252	10.40	12.88	10.85	11.18	10.01	11.45	9.82	11.64	10.83	10.18
FBXO45	HSD17B10	606	205	681	937	604	0.678	8.37	10.69	10.24	9.29	8.70	12.48	7.90	10.06	10.25	10.76
ABCA3	HSD17B4	464	601	815	994	796	0.632	8.87	11.17	12.96	12.07	7.45	13.93	13.89	12.62	10.00	11.79
BTBD9	HSD17B4	768	500	849	959	947	0.386	10.00	11.17	11.61	12.07	8.51	13.93	9.93	12.62	9.62	11.79
CISH	HSD17B4	652	349	265	883	156	0.690	10.79	11.17	4.33	12.07	11.06	13.93	10.54	12.62	10.12	11.79
ABCA3	HSDL2	33	51	571	800	367	0.565	8.87	11.41	12.96	10.71	7.45	12.79	13.89	10.38	10.00	12.91
CITED2	HSDL2	114	70	91	789	111	0.578	11.30	11.41	9.80	10.71	12.33	12.79	12.67	10.38	11.30	12.91
DKC1	HSF1	816	814	799	601	839	0.000	10.24	11.93	9.41	11.47	10.22	11.40	10.14	12.00	10.86	12.43
HDGF	HSPA14	271	887	845	907	951	0.244	13.20	9.38	12.30	8.99	13.58	9.18	13.07	9.11	13.43	10.15
FAM53C	HSPA9	181	908	919	512	840	0.006	13.24	11.52	11.22	13.42	9.83	14.02	10.54	12.94	11.79	14.31
ABCF2	HSPD1	694	492	998	785	893	0.188	10.66	11.79	11.35	12.87	10.03	14.41	10.65	12.96	12.40	12.91
CLN6	HSPD1	149	446	385	421	811	0.000	10.44	11.79	9.50	12.87	10.21	14.41	9.57	12.96	9.88	12.91
C1QTNF3	HTRA3	513	14	403	764	460	0.521	7.05	7.80	7.57	4.12	8.32	7.19	7.28	10.78	6.67	10.38
DDX56	HUS1	941	900	961	922	905	0.019	11.45	9.57	11.12	7.56	11.79	9.36	11.39	8.54	11.28	9.57
ACAP1	HVCN1	691	564	524	242	514	0.000	13.89	10.24	5.01	6.78	8.36	5.32	10.03	6.89	7.66	7.76
ATP6V1B2	HVCN1	810	1	798	737	709	0.133	13.91	10.24	13.89	6.78	11.51	5.32	12.98	6.89	12.08	7.76
CTSB	HVCN1	641	33	769	783	633	0.294	14.59	10.24	14.05	6.78	14.91	5.32	15.69	6.89	13.53	7.76
GLRX	HVCN1	652	110	598	504	628	0.002	11.63	10.24	9.51	6.78	11.75	5.32	10.95	6.89	13.06	7.76
CRELD1	HYAL2	67	114	388	364	649	0.000	9.99	9.58	11.80	9.07	11.43	10.20	10.48	13.24	11.06	10.07
FAXDC2	HYAL2	71	545	9	527	233	0.041	11.01	9.58	10.92	9.07	12.04	10.20	11.36	13.24	9.41	10.07
BTBD9	HYI	208	158	836	835	500	0.502	10.00	6.80	11.61	6.08	8.51	8.60	9.93	6.97	9.62	7.18
C1orf50	HYI	495	429	788	802	807	0.309	8.78	6.80	7.77	6.08	8.62	8.60	6.87	6.97	8.62	7.18
ALYREF	HYLS1	544	546	350	707	535	0.351	10.57	7.77	8.75	7.37	9.23	7.68	9.68	5.26	10.11	6.92
CHAF1A	HYLS1	489	860	755	907	729	0.392	9.43	7.77	8.20	7.37	7.93	7.68	7.87	5.26	9.76	6.92
GTSE1	HYLS1	141	358	508	686	151	0.368	7.44	7.77	2.67	7.37	4.54	7.68	4.58	5.26	3.86	6.92
HMGB2	HYLS1	531	277	453	431	19	0.000	12.89	7.77	9.65	7.37	9.32	7.68	11.40	5.26	10.55	6.92
F11R	IARS2	849	303	797	564	384	0.064	12.28	10.63	8.53	11.39	12.90	12.10	13.40	11.30	9.37	12.45
FAM189B	IARS2	907	828	755	966	817	0.279	9.82	10.63	10.80	11.39	9.46	12.10	9.64	11.30	10.67	12.45
CHKA	ICA1	773	621	341	980	854	0.586	10.04	8.47	11.02	10.46	10.86	8.31	9.74	9.19	8.96	7.61
CPT2	ICA1	682	104	351	968	350	0.845	8.98	8.47	7.80	10.46	11.51	8.31	8.10	9.19	9.99	7.61
AHCYL2	ICAM1	665	410	305	363	108	0.000	9.44	11.25	12.04	6.26	9.53	10.32	11.27	13.44	11.67	9.13
ANKRD28	ICAM1	417	65	631	513	84	0.019	10.00	11.25	10.98	6.26	11.05	10.32	10.78	13.44	12.32	9.13
BCL9L	ICAM1	739	164	436	775	50	0.430	10.43	11.25	9.61	6.26	10.06	10.32	11.64	13.44	11.22	9.13
CD47	ICAM1	442	73	768	578	807	0.078	11.79	11.25	12.20	6.26	10.56	10.32	12.96	13.44	10.21	9.13
FADS3	ICAM1	716	668	786	820	452	0.305	9.30	11.25	11.62	6.26	10.39	10.32	11.80	13.44	11.20	9.13
FRY	ICAM2	413	48	489	852	575	0.666	10.73	10.62	11.06	6.48	10.32	6.26	11.15	9.55	10.83	8.59
E2F1	ICT1	469	738	795	803	646	0.267	9.19	9.02	8.23	8.29	5.88	9.78	7.10	7.92	7.02	10.38
HPS1	IDE	421	823	952	983	866	0.396	12.88	9.81	11.18	8.85	11.45	10.59	11.64	9.90	10.18	11.94
HFE	IDH1	943	639	980	917	889	0.153	8.12	10.65	5.11	9.28	9.11	13.54	7.59	10.87	7.08	9.48
DNMT3A	IDH2	724	301	873	800	785	0.196	10.58	11.63	8.27	11.86	8.81	14.03	9.30	10.91	10.10	14.77
ALDH3B1	IDNK	918	485	387	901	772	0.466	11.94	8.98	5.99	8.44	7.87	9.67	11.59	6.55	7.26	6.39
CCNDBP1	IDNK	954	505	185	933	839	0.477	12.79	8.98	10.52	8.44	10.01	9.67	10.76	6.55	11.19	6.39
FAM120AOS	IDNK	940	696	420	962	907	0.403	10.64	8.98	10.26	8.44	9.99	9.67	10.20	6.55	10.35	6.39
CLCF1	IER5	855	536	878	639	567	0.087	8.21	11.08	3.87	9.96	6.65	9.06	8.04	11.08	6.31	11.45
ARHGAP18	IFFO1	799	595	621	741	457	0.254	9.71	11.53	6.02	11.27	7.83	10.44	11.17	10.92	8.93	10.23
CD4	IFFO1	722	144	714	817	684	0.324	12.14	11.53	8.27	11.27	11.68	10.44	12.30	10.92	7.15	10.23
CD40	IFFO1	826	195	917	384	542	0.000	9.40	11.53	6.30	11.27	9.22	10.44	10.51	10.92	8.76	10.23
CD6	IFFO1	643	474	666	452	690	0.000	11.48	11.53	5.64	11.27	6.39	10.44	8.00	10.92	4.34	10.23
EMP3	IFFO1	797	137	638	561	948	0.030	12.93	11.53	7.03	11.27	8.04	10.44	11.36	10.92	8.15	10.23
FCER1G	IFFO1	450	219	232	367	513	0.000	14.99	11.53	5.78	11.27	8.80	10.44	11.95	10.92	7.30	10.23
FOLR2	IFFO1	409	308	258	578	548	0.132	8.67	11.53	4.81	11.27	6.89	10.44	8.58	10.92	7.05	10.23
FPR1	IFFO1	471	195	133	198	117	0.000	16.67	11.53	5.00	11.27	7.63	10.44	10.81	10.92	6.27	10.23
GNG11	IFFO1	381	106	675	668	864	0.168	9.61	11.53	8.71	11.27	9.02	10.44	11.59	10.92	9.78	10.23
HLA-DMB	IFFO1	846	328	752	776	907	0.150	11.24	11.53	5.70	11.27	7.71	10.44	11.23	10.92	7.73	10.23
ACAP1	IFI30	781	695	180	162	651	0.000	13.89	15.29	5.01	5.93	8.36	11.34	10.03	13.82	7.66	7.64
CD6	IFI30	347	5	447	89	577	0.000	11.48	15.29	5.64	5.93	6.39	11.34	8.00	13.82	4.34	7.64
BATF	IFNAR2	796	534	835	704	178	0.187	10.50	11.57	1.72	7.92	5.46	9.49	6.71	9.77	3.89	8.39
BATF3	IFNAR2	295	513	738	867	825	0.446	7.10	11.57	6.62	7.92	5.49	9.49	7.22	9.77	5.38	8.39
ICOSLG	IFNGR2	60	278	136	758	857	0.387	9.62	12.94	9.17	9.98	8.90	10.21	9.15	11.01	7.95	9.78
BCL7B	IFRD1	361	664	645	265	646	0.000	10.91	12.23	11.19	10.39	10.76	11.14	10.88	11.61	11.75	11.61
DUSP14	IFRD1	488	672	202	321	624	0.000	7.35	12.23	9.14	10.39	9.12	11.14	7.70	11.61	8.73	11.61
BBX	IFT122	714	369	903	740	861	0.133	10.52	9.85	10.18	10.77	9.81	9.71	10.92	10.44	10.32	9.05
CAPS	IFT172	756	534	908	991	943	0.411	10.54	8.61	9.07	11.09	9.91	9.19	10.29	9.91	8.30	9.90
GOLPH3L	IFT172	442	834	725	911	885	0.350	9.38	8.61	8.53	11.09	9.18	9.19	9.15	9.91	9.65	9.90
C14orf79	IFT43	785	765	954	606	894	0.000	7.07	7.81	9.12	8.71	8.54	9.83	8.03	8.81	7.12	8.46
AEBP1	IGF1	501	18	47	377	719	0.000	9.24	5.41	11.07	5.91	11.28	11.82	14.79	9.51	10.88	9.58
ARHGAP25	IGF1	64	363	67	172	634	0.000	13.28	5.41	6.44	5.91	8.31	11.82	10.21	9.51	7.50	9.58
BTG2	IGF1	135	36	195	35	204	0.000	12.52	5.41	10.85	5.91	9.57	11.82	13.09	9.51	13.09	9.58
ENTPD1	IGFBP4	3	463	571	667	397	0.298	12.63	9.15	10.25	10.00	9.37	15.82	11.59	14.91	9.95	12.06
ANKH	IGFBP7	83	39	302	886	656	0.694	10.99	10.42	12.55	11.28	11.70	12.67	10.76	14.10	12.06	11.84
GRB2	IGFLR1	968	190	774	933	716	0.405	12.88	11.59	11.13	6.18	10.55	10.56	11.21	8.44	10.90	7.50
CTDSPL	IGIP	401	840	873	820	442	0.320	9.18	7.64	10.62	11.58	10.65	9.61	11.52	9.50	10.37	9.77
FOXP1	IGIP	607	887	154	831	573	0.406	11.49	7.64	10.43	11.58	10.41	9.61	11.61	9.50	9.99	9.77
GUCY1A3	IGIP	632	820	722	808	777	0.146	6.77	7.64	8.59	11.58	8.17	9.61	9.91	9.50	8.44	9.77
HERPUD1	IGLL5	331	0	413	234	0	0.000	12.09	6.74	11.30	0.05	13.12	2.57	12.75	2.73	12.22	0.34
IGF1	IGLL5	566	0	154	144	0	0.000	5.41	6.74	5.91	0.05	11.82	2.57	9.51	2.73	9.58	0.34
ACP2	IKZF1	745	94	541	543	546	0.022	10.17	12.91	10.30	4.65	12.20	7.92	10.28	10.14	9.52	6.36
CTSB	IKZF1	667	382	680	405	681	0.000	14.59	12.91	14.05	4.65	14.91	7.92	15.69	10.14	13.53	6.36
GPX1	IKZF1	168	565	538	490	627	0.000	13.80	12.91	11.51	4.65	13.18	7.92	12.85	10.14	11.27	6.36
HEXB	IKZF1	915	479	682	533	792	0.017	11.77	12.91	9.39	4.65	11.45	7.92	12.18	10.14	10.52	6.36
IFFO1	IKZF1	949	311	747	642	684	0.071	11.53	12.91	11.27	4.65	10.44	7.92	10.92	10.14	10.23	6.36
IGFLR1	IKZF1	830	683	398	799	679	0.268	11.59	12.91	6.18	4.65	10.56	7.92	8.44	10.14	7.50	6.36
ACAP1	IL10RA	703	458	572	815	692	0.397	13.89	13.01	5.01	6.73	8.36	8.99	10.03	11.33	7.66	7.68
ACP2	IL10RA	892	282	802	796	646	0.223	10.17	13.01	10.30	6.73	12.20	8.99	10.28	11.33	9.52	7.68
APOE	IL10RA	243	170	422	597	815	0.145	8.26	13.01	14.36	6.73	16.57	8.99	12.62	11.33	8.73	7.68
CD6	IL10RA	806	94	896	796	743	0.174	11.48	13.01	5.64	6.73	6.39	8.99	8.00	11.33	4.34	7.68
CYP27A1	IL10RA	536	561	146	736	306	0.423	10.83	13.01	10.07	6.73	14.61	8.99	12.12	11.33	10.70	7.68
DERL3	IL10RA	464	379	814	613	271	0.170	9.07	13.01	6.02	6.73	7.95	8.99	7.73	11.33	7.07	7.68
GLRX	IL10RA	317	640	796	643	199	0.144	11.63	13.01	9.51	6.73	11.75	8.99	10.95	11.33	13.06	7.68
ARRB1	IL11RA	696	446	287	489	463	0.000	11.24	10.19	11.27	9.85	8.65	11.03	11.25	9.90	8.61	9.78
GLRX	IL12RB1	43	583	751	422	185	0.000	11.63	10.74	9.51	4.22	11.75	5.87	10.95	7.13	13.06	3.71
APOE	IL16	7	20	552	319	398	0.000	8.26	12.89	14.36	5.64	16.57	7.99	12.62	10.96	8.73	8.18
CYP27A1	IL16	547	51	374	526	482	0.039	10.83	12.89	10.07	5.64	14.61	7.99	12.12	10.96	10.70	8.18
HERPUD1	IL16	890	381	631	740	239	0.294	12.09	12.89	11.30	5.64	13.12	7.99	12.75	10.96	12.22	8.18
APOE	IL17RA	3	144	242	353	630	0.000	8.26	13.86	14.36	8.86	16.57	10.17	12.62	11.36	8.73	8.63
ESYT1	IL17RA	25	567	979	845	509	0.479	11.83	13.86	11.05	8.86	12.42	10.17	12.45	11.36	11.90	8.63
GRB2	IL3RA	48	102	585	636	531	0.214	12.88	9.45	11.13	6.30	10.55	6.28	11.21	9.88	10.90	8.38
IL10RA	IL3RA	570	471	723	503	649	0.002	13.01	9.45	6.73	6.30	8.99	6.28	11.33	9.88	7.68	8.38
DUSP3	IL4R	818	4	711	787	224	0.325	11.16	14.13	12.56	8.99	12.78	13.12	12.40	13.61	13.85	9.39
IER5	IL4R	37	147	679	521	760	0.021	11.08	14.13	9.96	8.99	9.06	13.12	11.08	13.61	11.45	9.39
C19orf48	ILF3	942	917	924	782	832	0.000	9.78	12.42	7.96	12.89	10.20	12.65	8.88	13.71	8.59	13.31
CHAF1A	ILF3	963	936	763	657	971	0.000	9.43	12.42	8.20	12.89	7.93	12.65	7.87	13.71	9.76	13.31
CLN6	IMP3	939	950	735	991	955	0.193	10.44	9.89	9.50	10.11	10.21	10.89	9.57	9.50	9.88	10.50
ETS1	INPP1	532	338	546	773	293	0.507	12.49	9.56	9.08	10.43	10.77	10.23	13.32	10.31	10.72	9.83
ADAM19	INPP5D	786	63	385	885	476	0.627	12.45	14.00	8.38	9.07	9.65	9.11	10.55	11.41	8.32	8.78
CYLD	INPP5D	855	553	766	869	361	0.401	12.02	14.00	11.09	9.07	10.70	9.11	11.44	11.41	11.98	8.78
GLRX	INPP5D	453	410	617	280	133	0.000	11.63	14.00	9.51	9.07	11.75	9.11	10.95	11.41	13.06	8.78
ACAT1	INPP5K	544	920	595	957	211	0.634	9.64	12.01	10.70	10.58	14.36	10.15	10.77	11.27	13.55	11.36
ALDH3A2	INPP5K	781	879	636	764	686	0.103	10.03	12.01	10.92	10.58	13.35	10.15	12.04	11.27	11.88	11.36
CALCOCO2	INPP5K	898	616	988	945	1000	0.188	12.24	12.01	10.94	10.58	12.12	10.15	12.92	11.27	12.94	11.36
CRK	INPP5K	683	857	875	943	968	0.207	10.56	12.01	10.73	10.58	11.81	10.15	11.70	11.27	11.39	11.36
DHRS7B	INPP5K	777	946	844	904	477	0.295	9.86	12.01	8.81	10.58	8.99	10.15	8.94	11.27	10.16	11.36
GPD1L	INPP5K	592	885	852	978	224	0.541	9.40	12.01	11.02	10.58	7.49	10.15	10.99	11.27	13.46	11.36
C1orf198	IPO9	765	47	496	384	541	0.000	8.35	10.68	11.86	11.90	10.07	11.20	12.70	11.57	12.61	11.23
C9orf89	IPPK	352	799	862	262	710	0.000	12.70	7.59	9.97	6.48	9.06	6.68	10.49	6.27	9.86	7.94
DCUN1D5	IPPK	832	939	991	942	960	0.057	8.64	7.59	8.32	6.48	8.70	6.68	8.49	6.27	10.01	7.94
CD4	IQSEC1	195	65	612	793	388	0.530	12.14	13.42	8.27	14.11	11.68	12.01	12.30	12.13	7.15	11.39
CD81	IQSEC1	190	80	671	940	743	0.673	11.98	13.42	14.13	14.11	14.93	12.01	15.47	12.13	12.42	11.39
DAB2	IQSEC1	464	264	594	716	417	0.385	10.19	13.42	7.96	14.11	9.53	12.01	12.96	12.13	10.09	11.39
FOLR2	IQSEC1	148	427	575	428	317	0.000	8.67	13.42	4.81	14.11	6.89	12.01	8.58	12.13	7.05	11.39
GRN	IQSEC1	825	525	769	603	772	0.039	14.41	13.42	10.49	14.11	12.21	12.01	14.41	12.13	11.40	11.39
ECE2	IRAK1	573	534	985	988	1000	0.436	7.85	12.40	10.21	11.39	8.77	11.71	5.65	12.20	7.96	12.34
HPRT1	IRAK1	698	772	445	922	420	0.609	9.75	12.40	11.07	11.39	9.30	11.71	8.69	12.20	9.56	12.34
BCL3	IRAK2	512	608	846	935	385	0.637	12.96	9.33	7.53	7.02	13.00	9.60	12.11	9.10	9.59	10.10
BHLHE40	IRAK2	736	459	726	496	32	0.000	12.18	9.33	12.40	7.02	13.53	9.60	13.49	9.10	13.85	10.10
CLCF1	IRAK2	788	761	932	679	526	0.076	8.21	9.33	3.87	7.02	6.65	9.60	8.04	9.10	6.31	10.10
G0S2	IRAK2	684	554	821	899	9	0.518	11.35	9.33	5.31	7.02	12.74	9.60	11.35	9.10	10.51	10.10
HAPLN3	IRF1	461	858	799	931	688	0.440	9.91	13.53	6.47	7.28	5.65	10.83	9.15	12.21	9.00	9.28
ARPC2	IRF5	826	582	680	808	477	0.331	14.63	11.37	12.36	6.65	11.91	8.62	13.74	9.75	13.04	6.39
BCL6	IRF6	24	318	389	286	141	0.000	15.42	6.90	11.51	4.42	12.59	10.87	13.82	8.74	14.96	5.72
DDR1	IRF6	423	91	244	998	368	0.996	8.38	6.90	12.96	4.42	8.82	10.87	11.84	8.74	11.55	5.72
DDX21	IRF6	678	257	361	574	124	0.111	11.18	6.90	9.42	4.42	11.28	10.87	12.04	8.74	12.12	5.72
EIF4G1	IRF6	603	319	818	830	200	0.450	12.33	6.90	13.13	4.42	14.36	10.87	14.13	8.74	15.01	5.72
F11R	IRF6	77	306	653	881	358	0.685	12.28	6.90	8.53	4.42	12.90	10.87	13.40	8.74	9.37	5.72
HMCES	IRF6	643	232	713	931	431	0.684	10.72	6.90	11.10	4.42	10.93	10.87	10.31	8.74	11.26	5.72
ABI3	IRF8	650	910	571	661	643	0.059	11.43	11.63	5.16	5.25	7.26	9.65	9.24	10.22	6.96	5.73
AMICA1	IRF8	345	204	463	745	766	0.367	13.99	11.63	3.15	5.25	8.01	9.65	10.35	10.22	5.76	5.73
ATG7	IRF8	638	218	751	844	541	0.473	11.17	11.63	9.64	5.25	8.51	9.65	9.40	10.22	9.34	5.73
ATP6V0D1	IRF8	439	208	632	848	514	0.623	13.64	11.63	12.71	5.25	11.55	9.65	12.10	10.22	12.12	5.73
ATP6V1B2	IRF8	482	287	583	763	429	0.484	13.91	11.63	13.89	5.25	11.51	9.65	12.98	10.22	12.08	5.73
BTN2A2	IRF8	897	471	384	476	659	0.000	9.71	11.63	6.53	5.25	8.15	9.65	9.79	10.22	7.49	5.73
CYP27A1	IRF8	428	266	124	929	129	0.858	10.83	11.63	10.07	5.25	14.61	9.65	12.12	10.22	10.70	5.73
DOK1	IRF8	575	502	633	793	900	0.335	11.46	11.63	6.78	5.25	6.80	9.65	8.98	10.22	6.56	5.73
EVL	IRF8	687	206	292	703	421	0.312	12.73	11.63	13.78	5.25	12.91	9.65	12.35	10.22	10.51	5.73
FAM78A	IRF8	840	274	315	710	61	0.315	11.43	11.63	9.03	5.25	7.00	9.65	9.04	10.22	10.25	5.73
FKBP15	IRF8	737	519	490	860	497	0.592	12.58	11.63	10.52	5.25	10.83	9.65	11.80	10.22	10.90	5.73
FMNL1	IRF8	640	177	703	630	935	0.065	14.54	11.63	11.04	5.25	8.82	9.65	12.03	10.22	8.26	5.73
FTL	IRF8	413	255	430	860	662	0.639	18.59	11.63	16.19	5.25	17.22	9.65	18.59	10.22	14.18	5.73
GLRX	IRF8	510	604	810	775	162	0.355	11.63	11.63	9.51	5.25	11.75	9.65	10.95	10.22	13.06	5.73
GLUL	IRF8	516	251	324	689	95	0.370	16.05	11.63	17.85	5.25	14.08	9.65	16.28	10.22	16.03	5.73
GPX1	IRF8	251	447	660	848	550	0.591	13.80	11.63	11.51	5.25	13.18	9.65	12.85	10.22	11.27	5.73
IL3RA	IRF8	442	540	664	560	554	0.043	9.45	11.63	6.30	5.25	6.28	9.65	9.88	10.22	8.38	5.73
ACACB	ISCU	579	58	545	801	60	0.540	9.42	11.86	10.48	12.81	13.66	11.41	10.47	11.91	14.55	12.87
ARHGDIB	ISCU	734	500	881	769	818	0.152	16.50	11.86	8.63	12.81	10.52	11.41	13.01	11.91	10.22	12.87
CD74	ISCU	155	245	823	835	693	0.412	16.09	11.86	11.52	12.81	13.32	11.41	16.98	11.91	12.63	12.87
CREBRF	ISCU	690	862	893	945	466	0.417	12.18	11.86	9.91	12.81	10.51	11.41	11.17	11.91	10.55	12.87
HLA-DMA	ISCU	267	274	838	890	736	0.493	11.56	11.86	6.73	12.81	8.90	11.41	12.02	11.91	8.66	12.87
HLA-DMB	ISCU	385	286	817	777	687	0.322	11.24	11.86	5.70	12.81	7.71	11.41	11.23	11.91	7.73	12.87
DNAJC13	ISY1	959	985	946	971	999	0.018	10.80	11.12	10.51	9.29	10.38	9.52	11.40	9.86	11.20	10.30
ADM	ITCH	634	301	135	487	746	0.000	12.97	11.74	7.41	10.54	10.45	11.89	12.16	11.20	10.85	11.28
ALYREF	ITCH	550	715	675	695	937	0.083	10.57	11.74	8.75	10.54	9.23	11.89	9.68	11.20	10.11	11.28
ATG101	ITCH	101	108	96	50	47	0.000	0.00	11.74	0.00	10.54	0.00	11.89	0.00	11.20	0.00	11.28
CCT7	ITCH	648	900	740	721	977	0.036	11.96	11.74	12.27	10.54	11.95	11.89	12.36	11.20	13.25	11.28
CSTF2	ITCH	782	955	762	507	824	0.000	8.62	11.74	7.77	10.54	7.60	11.89	7.60	11.20	7.99	11.28
DNAJC2	ITCH	886	979	607	903	1000	0.157	9.07	11.74	8.82	10.54	9.59	11.89	9.29	11.20	10.55	11.28
EXOSC3	ITCH	909	956	903	653	975	0.000	9.40	11.74	7.47	10.54	8.51	11.89	7.86	11.20	8.51	11.28
GMPS	ITCH	728	985	831	992	1000	0.216	10.35	11.74	10.20	10.54	9.93	11.89	10.53	11.20	10.51	11.28
HILPDA	ITCH	48	431	216	240	259	0.000	10.17	11.74	8.27	10.54	8.30	11.89	8.80	11.20	7.31	11.28
APMAP	ITFG3	699	651	686	980	854	0.515	13.88	10.88	11.98	10.54	14.10	11.75	11.96	11.42	10.81	12.98
ASAP1	ITGA5	630	348	928	841	936	0.276	12.51	13.21	11.04	7.77	9.80	12.02	12.25	13.88	10.57	11.23
CALU	ITGA5	487	662	878	792	784	0.215	10.20	13.21	10.37	7.77	11.56	12.02	12.92	13.88	11.96	11.23
CRISPLD2	ITGA5	690	931	598	883	956	0.239	12.06	13.21	7.70	7.77	9.54	12.02	13.48	13.88	10.43	11.23
CSGALNACT2	ITGA5	319	596	914	837	890	0.289	12.67	13.21	9.20	7.77	9.69	12.02	11.55	13.88	10.42	11.23
CTSL	ITGA5	97	661	897	517	901	0.009	10.58	13.21	10.41	7.77	12.48	12.02	12.87	13.88	11.25	11.23
FOXO1	ITGA5	649	792	398	664	734	0.089	10.46	13.21	8.99	7.77	10.80	12.02	11.48	13.88	13.10	11.23
FYN	ITGA5	542	617	94	798	970	0.367	12.27	13.21	12.80	7.77	10.11	12.02	12.30	13.88	9.58	11.23
HBEGF	ITGA5	62	835	739	628	359	0.128	9.05	13.21	8.46	7.77	7.15	12.02	11.14	13.88	10.08	11.23
ABHD6	ITGA6	501	67	897	750	480	0.374	8.61	9.80	9.93	10.03	11.20	9.60	8.06	11.64	8.20	10.73
DST	ITGA6	722	426	444	743	740	0.255	8.25	9.80	14.78	10.03	13.41	9.60	14.55	11.64	14.21	10.73
FAM43A	ITGA6	606	330	586	565	706	0.033	8.81	9.80	8.09	10.03	7.61	9.60	9.18	11.64	8.38	10.73
ABCC1	ITGB4	178	3	872	458	182	0.000	10.87	8.22	8.72	10.83	8.42	7.72	11.69	10.33	11.54	8.99
AP2M1	ITGB4	591	2	554	702	739	0.231	13.46	8.22	14.96	10.83	12.91	7.72	13.65	10.33	12.83	8.99
CAPN1	ITGB4	707	81	473	779	676	0.366	13.02	8.22	12.18	10.83	12.28	7.72	12.76	10.33	12.28	8.99
DIP2C	ITGB5	185	207	672	911	475	0.736	6.76	9.80	11.03	10.23	10.38	12.45	9.73	12.66	11.82	11.23
ADAM19	ITGB7	11	169	8	655	674	0.233	12.45	11.72	8.38	4.64	9.65	8.41	10.55	7.94	8.32	5.52
APOE	ITGB7	639	580	718	221	808	0.000	8.26	11.72	14.36	4.64	16.57	8.41	12.62	7.94	8.73	5.52
C1QA	ITGB7	420	345	170	93	462	0.000	10.63	11.72	7.16	4.64	9.61	8.41	12.90	7.94	8.16	5.52
CD53	ITGB7	12	263	298	378	504	0.000	15.30	11.72	8.05	4.64	8.96	8.41	12.14	7.94	7.24	5.52
IRF8	ITGB7	539	291	44	416	668	0.000	11.63	11.72	5.25	4.64	9.65	8.41	10.22	7.94	5.73	5.52
FYCO1	ITM2B	370	382	939	926	676	0.551	10.01	16.19	9.16	13.90	10.50	13.71	11.37	15.22	13.90	12.80
CLIP3	ITM2C	671	280	922	898	892	0.316	7.54	10.54	14.73	15.87	7.65	10.68	9.40	11.03	8.22	9.50
C19orf48	ITPA	887	905	947	1000	869	0.196	9.78	10.18	7.96	9.44	10.20	10.03	8.88	9.46	8.59	9.50
CD74	ITPR2	145	597	421	697	605	0.293	16.09	10.24	11.52	9.82	13.32	11.55	16.98	9.84	12.63	8.97
GNS	ITPR2	938	791	624	995	891	0.368	13.48	10.24	10.62	9.82	11.77	11.55	13.23	9.84	11.76	8.97
ATP11A	ITPR3	87	684	510	980	688	0.769	11.64	10.94	10.03	10.05	10.95	9.19	12.72	13.54	10.74	10.22
BTBD9	ITPR3	442	51	656	987	449	0.896	10.00	10.94	11.61	10.05	8.51	9.19	9.93	13.54	9.62	10.22
CERS2	ITPR3	285	723	105	987	974	0.625	11.73	10.94	10.11	10.05	13.35	9.19	12.00	13.54	9.89	10.22
AMOTL1	ITPRIP	398	404	377	775	310	0.550	7.62	13.16	9.61	7.01	10.59	9.05	11.84	11.97	14.12	9.71
DUSP7	ITPRIP	539	138	671	687	189	0.269	10.29	13.16	11.16	7.01	8.56	9.05	11.10	11.97	10.60	9.71
EPB41L2	ITPRIP	413	465	748	528	663	0.028	8.91	13.16	12.59	7.01	10.15	9.05	12.95	11.97	10.64	9.71
INPP1	ITPRIP	766	410	877	830	245	0.362	9.56	13.16	10.43	7.01	10.23	9.05	10.31	11.97	9.83	9.71
EPAS1	ITSN2	599	344	923	804	856	0.255	9.57	11.95	12.89	10.29	13.73	11.25	17.49	12.16	12.61	11.34
FAM126B	ITSN2	979	953	846	953	656	0.202	11.69	11.95	10.28	10.29	9.74	11.25	10.21	12.16	9.50	11.34
GPD1L	ITSN2	872	891	922	888	116	0.202	9.40	11.95	11.02	10.29	7.49	11.25	10.99	12.16	13.46	11.34
CACNA2D2	IVD	894	576	256	934	516	0.625	8.53	10.45	9.49	11.90	5.92	13.72	11.55	11.25	7.82	11.41
FAM219B	IVD	803	929	550	919	449	0.452	10.80	10.45	11.76	11.90	10.10	13.72	11.43	11.25	11.09	11.41
EPAS1	JADE1	0	0	0	0	0	0.000	9.57	0.00	12.89	0.00	13.73	0.00	17.49	0.00	12.61	0.00
C15orf41	JAG1	436	431	697	354	524	0.000	6.79	8.20	6.52	9.19	7.86	9.31	6.37	12.08	9.16	10.40
DST	JAG1	536	379	608	749	795	0.301	8.25	8.20	14.78	9.19	13.41	9.31	14.55	12.08	14.21	10.40
GFOD1	JAG1	665	143	369	515	630	0.015	10.38	8.20	12.07	9.19	10.03	9.31	10.91	12.08	11.02	10.40
INPP5A	JAG1	746	186	514	714	559	0.284	10.68	8.20	10.60	9.19	9.64	9.31	10.72	12.08	11.56	10.40
DALRD3	JAGN1	997	909	904	950	824	0.106	10.04	10.16	9.40	8.91	8.62	10.60	8.82	9.38	8.80	10.39
ANXA6	JAK3	152	715	478	303	342	0.000	13.34	14.18	13.41	8.99	13.42	8.48	13.49	10.98	13.33	7.03
C11orf24	JAK3	478	669	475	600	506	0.147	9.69	14.18	9.16	8.99	12.07	8.48	10.17	10.98	9.27	7.03
ADARB1	JAM3	789	195	939	721	932	0.111	9.95	8.47	11.09	10.95	9.64	7.93	12.56	11.29	10.70	9.16
CRY2	JDP2	155	664	646	698	219	0.241	10.52	11.75	12.46	9.82	12.61	9.63	11.41	11.05	12.79	9.88
HILPDA	JHDM1D-AS1	9	440	486	29	211	0.000	10.17	9.60	8.27	6.31	8.30	7.65	8.80	6.15	7.31	8.73
ANGPTL4	JMJD6	757	523	692	581	517	0.061	6.89	12.26	9.56	10.04	12.55	10.07	9.98	10.43	9.43	11.52
INO80	JMJD7	988	984	983	935	574	0.180	10.36	9.55	9.87	8.78	10.32	8.87	10.67	9.09	11.27	8.70
GDE1	JMJD8	294	873	972	980	714	0.430	11.62	9.34	11.45	8.59	10.14	9.87	10.70	9.29	11.67	9.01
GPAA1	JRK	886	829	648	972	846	0.340	11.71	9.82	11.65	10.00	12.06	9.07	11.55	9.27	11.68	10.20
ICA1	JTB	630	750	466	821	681	0.361	8.47	12.47	10.46	11.73	8.31	12.65	9.19	12.02	7.61	12.04
ABCC1	JUP	630	79	472	802	632	0.473	10.87	9.59	8.72	9.46	8.42	12.57	11.69	12.60	11.54	12.64
F11R	JUP	133	478	840	780	263	0.420	12.28	9.59	8.53	9.46	12.90	12.57	13.40	12.60	9.37	12.64
F8	KANK2	14	358	440	531	657	0.046	8.79	8.98	9.46	9.99	9.34	11.88	10.11	13.70	10.75	11.73
FRY	KANK2	38	41	385	977	480	0.954	10.73	8.98	11.06	9.99	10.32	11.88	11.15	13.70	10.83	11.73
GNAQ	KANK2	17	371	904	826	853	0.326	12.03	8.98	12.72	9.99	10.87	11.88	12.41	13.70	10.69	11.73
GUCY1A3	KANK2	231	322	902	901	613	0.545	6.77	8.98	8.59	9.99	8.17	11.88	9.91	13.70	8.44	11.73
CCDC43	KAT2A	702	792	245	387	355	0.000	8.36	10.95	8.57	13.23	7.94	12.66	7.82	11.94	10.62	11.95
AP1S2	KAT2B	884	493	424	966	808	0.586	10.84	11.38	10.40	11.46	8.09	10.96	9.86	10.49	11.74	11.94
ARHGEF3	KAT2B	890	55	400	928	657	0.583	10.98	11.38	10.85	11.46	7.58	10.96	10.63	10.49	9.47	11.94
BTN3A1	KAT2B	603	775	561	891	538	0.543	12.26	11.38	8.62	11.46	10.33	10.96	11.45	10.49	8.58	11.94
CELF2	KAT2B	641	131	395	863	338	0.655	13.59	11.38	12.90	11.46	8.49	10.96	12.77	10.49	11.43	11.94
GPD1L	KAT2B	898	170	552	942	742	0.538	9.40	11.38	11.02	11.46	7.49	10.96	10.99	10.49	13.46	11.94
GUCY1A3	KAT2B	577	233	656	925	658	0.654	6.77	11.38	8.59	11.46	8.17	10.96	9.91	10.49	8.44	11.94
FGFR2	KAT6B	414	579	886	747	260	0.331	5.05	9.50	11.85	10.36	10.94	9.75	9.19	10.38	4.66	11.07
CASC3	KAT7	738	739	1000	977	1000	0.238	13.41	11.31	12.50	10.97	11.55	9.94	12.73	10.46	12.48	11.48
KANSL1	KAT7	956	939	997	995	997	0.048	11.61	11.31	10.53	10.97	10.61	9.94	11.13	10.46	11.18	11.48
ADIPOR2	KCMF1	947	242	772	840	925	0.204	11.66	11.80	11.71	11.13	12.99	10.88	12.53	11.02	11.90	12.87
C2	KCNAB2	366	436	288	796	143	0.592	8.88	13.55	6.16	14.97	14.70	9.54	11.67	11.86	7.04	9.59
CTSL	KCNAB2	204	566	400	485	556	0.000	10.58	13.55	10.41	14.97	12.48	9.54	12.87	11.86	11.25	9.59
FTL	KCNAB2	589	48	270	841	381	0.637	18.59	13.55	16.19	14.97	17.22	9.54	18.59	11.86	14.18	9.59
HLA-DPB1	KCNAB2	497	45	371	681	74	0.362	12.12	13.55	7.57	14.97	9.30	9.54	12.84	11.86	8.93	9.59
IRF8	KCNAB2	839	206	228	946	301	0.723	11.63	13.55	5.25	14.97	9.65	9.54	10.22	11.86	5.73	9.59
FAM43A	KCNJ2	759	466	679	521	334	0.021	8.81	10.60	8.09	7.09	7.61	5.34	9.18	7.23	8.38	8.43
FTL	KCNJ5	0	173	333	774	475	0.000	18.59	3.30	16.19	4.25	17.22	3.09	18.59	6.52	14.18	3.96
FUCA1	KCNJ5	0	459	594	880	639	0.000	10.15	3.30	7.78	4.25	10.81	3.09	9.98	6.52	9.16	3.96
HLA-DMB	KCNJ5	0	466	896	784	832	0.000	11.24	3.30	5.70	4.25	7.71	3.09	11.23	6.52	7.73	3.96
AHCYL2	KCNQ1	706	386	641	994	308	0.815	9.44	10.85	12.04	4.21	9.53	6.07	11.27	9.49	11.67	6.01
C3	KCNQ1	36	922	898	629	785	0.065	8.71	10.85	10.07	4.21	17.49	6.07	15.40	9.49	11.98	6.01
CACNA2D2	KCNQ1	23	91	130	983	404	0.966	8.53	10.85	9.49	4.21	5.92	6.07	11.55	9.49	7.82	6.01
CD81	KCNQ1	175	382	439	774	868	0.411	11.98	10.85	14.13	4.21	14.93	6.07	15.47	9.49	12.42	6.01
AGBL5	KCTD1	740	861	864	950	874	0.231	9.48	6.46	9.46	11.30	8.76	7.03	9.00	6.90	9.01	8.03
BYSL	KCTD20	514	824	978	738	826	0.112	8.50	11.67	7.59	10.92	8.72	11.62	7.87	11.66	10.13	11.32
CREB3L1	KDELR1	162	542	702	804	452	0.486	5.09	11.61	7.19	10.76	5.61	12.26	9.57	12.33	7.41	11.33
FIZ1	KDELR1	630	766	847	928	887	0.291	9.48	11.61	10.01	10.76	9.15	12.26	8.40	12.33	9.51	11.33
CHPF2	KDELR2	833	714	974	905	958	0.132	11.52	11.11	9.71	10.42	10.40	13.82	10.72	12.82	9.41	11.29
CCDC23	KDM1A	321	963	981	871	942	0.185	9.47	10.44	8.14	11.11	7.72	10.64	7.20	10.97	8.53	11.62
AGO4	KDM4A	941	889	835	776	877	0.000	12.14	10.39	10.09	9.91	10.37	10.10	11.34	9.79	11.09	9.90
IPO13	KDM4A	934	735	863	998	921	0.270	10.34	10.39	12.25	9.91	10.48	10.10	10.11	9.79	13.22	9.90
ARMC6	KEAP1	996	966	471	1000	779	0.380	10.18	10.81	9.94	11.20	11.78	11.48	9.17	10.67	10.00	13.07
E2F2	KHSRP	354	89	740	553	350	0.080	10.89	11.52	1.27	11.86	4.49	11.98	5.81	12.04	3.07	12.08
BOP1	KIAA0020	910	632	978	994	990	0.233	8.23	8.96	6.79	7.15	6.88	9.72	6.09	9.89	9.38	9.38
C19orf48	KIAA0020	863	688	826	949	870	0.275	9.78	8.96	7.96	7.15	10.20	9.72	8.88	9.89	8.59	9.38
ARRB1	KIAA0232	583	841	414	892	452	0.572	11.24	11.65	11.27	11.73	8.65	11.08	11.25	10.78	8.61	12.40
CD82	KIAA0247	812	580	850	729	735	0.074	12.67	12.65	9.13	10.15	10.39	10.59	12.09	12.61	9.66	10.64
HIVEP3	KIAA0247	189	734	953	870	602	0.387	8.90	12.65	9.75	10.15	7.64	10.59	9.52	12.61	8.11	10.64
BCAM	KIAA0319L	1	112	735	894	605	0.618	8.07	12.29	10.26	12.02	11.53	12.04	13.11	11.82	10.96	11.99
ITPR3	KIAA0319L	47	184	312	980	755	0.833	10.94	12.29	10.05	12.02	9.19	12.04	13.54	11.82	10.22	11.99
FYCO1	KIAA0430	788	138	994	988	90	0.588	10.01	12.71	9.16	12.66	10.50	11.07	11.37	11.82	13.90	11.97
KANK2	KIAA0430	105	87	768	954	705	0.671	8.98	12.71	9.99	12.66	11.88	11.07	13.70	11.82	11.73	11.97
ACTR10	KIAA0586	974	913	967	999	945	0.099	10.67	9.09	11.18	7.97	10.08	8.81	10.38	8.30	10.76	9.24
ERH	KIAA0586	890	799	977	957	892	0.145	10.20	9.09	10.31	7.97	10.62	8.81	10.31	8.30	10.31	9.24
ISCA2	KIAA0586	859	867	857	975	683	0.317	9.42	9.09	8.39	7.97	8.74	8.81	7.81	8.30	9.44	9.24
CTSO	KIAA1109	834	518	949	971	877	0.353	9.69	11.13	8.95	12.69	11.32	11.27	10.71	12.39	8.60	11.97
ARSD	KIAA1671	34	269	830	931	675	0.610	10.03	7.51	7.62	11.22	11.49	12.20	9.70	10.60	7.24	11.55
FAM120B	KIAA1671	113	807	925	977	621	0.527	10.71	7.51	10.50	11.22	10.05	12.20	10.31	10.60	10.73	11.55
FGFR2	KIAA1671	595	203	485	860	399	0.672	5.05	7.51	11.85	11.22	10.94	12.20	9.19	10.60	4.66	11.55
FRY	KIF13B	832	84	834	811	329	0.311	10.73	10.32	11.06	10.79	10.32	11.19	11.15	11.04	10.83	9.97
CRK	KIF1C	719	273	958	993	716	0.539	10.56	11.02	10.73	13.37	11.81	13.19	11.70	13.58	11.39	15.45
DNMT3A	KIF3C	520	667	925	840	518	0.407	10.58	10.05	8.27	13.82	8.81	6.07	9.30	7.53	10.10	7.74
ARF5	KIFC1	15	102	686	675	402	0.263	12.12	8.16	12.01	2.52	11.41	4.78	11.15	5.93	11.21	4.27
BUB3	KIFC1	696	351	808	650	543	0.129	11.10	8.16	10.26	2.52	11.07	4.78	11.01	5.93	10.86	4.27
CABLES2	KIFC1	258	113	508	689	452	0.374	9.60	8.16	9.69	2.52	8.40	4.78	7.70	5.93	9.19	4.27
CBX3	KIFC1	55	189	733	685	444	0.278	11.48	8.16	11.23	2.52	11.58	4.78	11.87	5.93	11.81	4.27
COPS6	KIFC1	460	214	801	586	488	0.129	11.09	8.16	11.80	2.52	11.13	4.78	10.99	5.93	11.93	4.27
CPSF4	KIFC1	542	190	495	566	466	0.111	9.86	8.16	10.18	2.52	9.49	4.78	9.24	5.93	10.35	4.27
CSE1L	KIFC1	473	197	865	597	456	0.145	10.35	8.16	10.96	2.52	10.78	4.78	10.85	5.93	11.76	4.27
DDX39A	KIFC1	801	604	701	553	523	0.015	11.50	8.16	9.27	2.52	10.41	4.78	11.07	5.93	9.99	4.27
EFTUD2	KIFC1	405	247	781	583	364	0.124	11.68	8.16	11.11	2.52	10.97	4.78	11.36	5.93	12.19	4.27
EPT1	KIFC1	716	156	374	466	226	0.000	8.79	8.16	10.37	2.52	11.34	4.78	9.83	5.93	10.43	4.27
FOXRED1	KIFC1	443	185	559	618	338	0.206	9.86	8.16	10.69	2.52	10.99	4.78	8.59	5.93	10.03	4.27
G2E3	KIFC1	267	225	766	528	499	0.042	8.92	8.16	8.38	2.52	8.22	4.78	8.60	5.93	8.87	4.27
GEMIN6	KIFC1	74	68	699	514	498	0.021	7.90	8.16	7.38	2.52	8.81	4.78	6.74	5.93	8.14	4.27
GMPS	KIFC1	825	170	824	604	388	0.104	10.35	8.16	10.20	2.52	9.93	4.78	10.53	5.93	10.51	4.27
GPN1	KIFC1	562	376	835	576	506	0.080	10.27	8.16	9.64	2.52	9.43	4.78	9.53	5.93	10.37	4.27
HSD17B10	KIFC1	475	453	605	522	432	0.033	10.69	8.16	9.29	2.52	12.48	4.78	10.06	5.93	10.76	4.27
HYLS1	KIFC1	131	69	706	635	428	0.203	7.77	8.16	7.37	2.52	7.68	4.78	5.26	5.93	6.92	4.27
ATP1B3	KLF16	231	631	863	814	927	0.248	11.47	10.53	11.55	10.41	9.07	9.26	12.73	8.62	10.33	7.41
FAM65A	KLF6	522	598	353	593	792	0.082	11.51	13.71	12.35	10.35	10.62	12.45	12.71	14.17	11.34	12.85
C10orf10	KLF9	274	487	641	765	821	0.327	9.58	10.61	10.57	11.57	12.35	12.11	14.61	13.49	12.39	13.62
C14orf79	KLHDC2	831	883	186	797	692	0.201	7.07	10.24	9.12	11.19	8.54	11.89	8.03	10.48	7.12	11.83
CABLES1	KLHDC2	287	53	947	986	651	0.673	6.43	10.24	11.89	11.19	9.34	11.89	9.38	10.48	7.16	11.83
HMGCL	KLHL12	890	616	660	1000	716	0.559	10.43	10.54	9.21	10.46	13.52	10.06	9.80	9.63	10.64	10.13
HSPD1	KLHL18	112	481	966	579	865	0.079	11.79	10.47	12.87	9.79	14.41	8.67	12.96	9.20	12.91	9.98
C1orf198	KLHL20	591	488	447	665	430	0.284	8.35	8.85	11.86	8.20	10.07	9.57	12.70	9.26	12.61	9.90
GUCD1	KLHL22	864	663	642	977	634	0.552	12.28	10.13	10.25	10.73	13.34	9.34	11.73	8.85	12.85	10.23
ARHGEF40	KLHL3	28	160	872	648	397	0.222	12.31	7.68	10.53	10.45	12.32	8.42	11.68	8.60	10.77	8.48
IGFBP7	KLHL3	353	2	667	500	885	0.000	10.42	7.68	11.28	10.45	12.67	8.42	14.10	8.60	11.84	8.48
ITSN1	KLHL3	316	611	109	599	465	0.148	9.26	7.68	12.37	10.45	11.69	8.42	10.58	8.60	10.89	8.48
BCAT2	KLHL8	146	218	576	646	168	0.254	9.36	10.38	9.45	8.27	9.88	9.45	10.18	8.66	10.83	10.75
E2F1	KNSTRN	508	784	820	871	588	0.392	9.19	9.00	8.23	7.68	5.88	7.97	7.10	7.27	7.02	8.77
GTSE1	KNSTRN	498	370	780	760	391	0.390	7.44	9.00	2.67	7.68	4.54	7.97	4.58	7.27	3.86	8.77
ILF3	KNSTRN	455	922	880	629	909	0.065	12.42	9.00	12.89	7.68	12.65	7.97	13.71	7.27	13.31	8.77
ADIPOR2	KRAS	918	156	764	701	900	0.101	11.66	11.19	11.71	10.22	12.99	10.33	12.53	10.59	11.90	10.01
ADM	KRT17	159	51	378	255	152	0.000	12.97	3.99	7.41	2.07	10.45	2.77	12.16	4.91	10.85	3.43
IRF6	KRT17	329	362	94	612	411	0.224	6.90	3.99	4.42	2.07	10.87	2.77	8.74	4.91	5.72	3.43
CSF1	LACTB	80	593	723	481	142	0.000	9.75	10.46	9.52	7.31	10.57	10.47	12.27	9.59	10.02	10.98
EHD1	LACTB	896	652	667	728	417	0.182	13.78	10.46	10.60	7.31	10.85	10.47	12.31	9.59	11.16	10.98
ETS1	LACTB	85	753	708	597	253	0.097	12.49	10.46	9.08	7.31	10.77	10.47	13.32	9.59	10.72	10.98
KCNAB2	LACTB	647	508	374	774	283	0.470	13.55	10.46	14.97	7.31	9.54	10.47	11.86	9.59	9.59	10.98
E2F1	LAGE3	590	858	694	779	744	0.154	9.19	8.82	8.23	9.83	5.88	8.59	7.10	7.28	7.02	8.96
ACAP1	LAIR1	816	422	501	284	633	0.000	13.89	12.34	5.01	5.85	8.36	7.48	10.03	11.06	7.66	6.67
AMDHD2	LAIR1	126	48	417	877	728	0.640	10.29	12.34	8.26	5.85	8.73	7.48	8.57	11.06	8.36	6.67
CREBL2	LAIR1	547	296	823	624	735	0.101	10.34	12.34	11.30	5.85	11.21	7.48	10.87	11.06	9.68	6.67
CYP27A1	LAIR1	286	488	33	923	175	0.846	10.83	12.34	10.07	5.85	14.61	7.48	12.12	11.06	10.70	6.67
GLUL	LAIR1	163	406	428	769	109	0.538	16.05	12.34	17.85	5.85	14.08	7.48	16.28	11.06	16.03	6.67
CHD1L	LAMTOR2	382	514	684	899	878	0.510	10.46	10.59	10.28	9.51	11.33	11.05	10.64	9.42	10.31	10.05
AFF1	LAMTOR3	890	430	916	731	752	0.116	11.60	10.20	10.22	10.43	11.86	9.95	12.67	9.84	13.42	10.15
CD6	LAP3	525	72	370	477	257	0.000	11.48	11.15	5.64	10.53	6.39	12.26	8.00	12.33	4.34	11.55
ACAP1	LAPTM5	938	421	284	232	523	0.000	13.89	17.05	5.01	8.70	8.36	10.31	10.03	14.12	7.66	8.61
ACP2	LAPTM5	629	87	828	883	631	0.472	10.17	17.05	10.30	8.70	12.20	10.31	10.28	14.12	9.52	8.61
CD6	LAPTM5	162	20	673	147	497	0.000	11.48	17.05	5.64	8.70	6.39	10.31	8.00	14.12	4.34	8.61
CYP27A1	LAPTM5	490	445	27	937	242	0.874	10.83	17.05	10.07	8.70	14.61	10.31	12.12	14.12	10.70	8.61
GLUL	LAPTM5	323	564	522	879	605	0.662	16.05	17.05	17.85	8.70	14.08	10.31	16.28	14.12	16.03	8.61
KCNJ5	LAPTM5	101	659	889	735	550	0.248	3.30	17.05	4.25	8.70	3.09	10.31	6.52	14.12	3.96	8.61
CREB3L1	LARGE	47	821	162	663	307	0.244	5.09	7.33	7.19	11.49	5.61	9.65	9.57	9.29	7.41	11.84
ATG101	LARP4	101	108	96	50	47	0.000	0.00	8.86	0.00	9.42	0.00	12.19	0.00	10.81	0.00	11.77
FOXK2	LARP4	859	741	657	980	991	0.342	10.58	8.86	10.94	9.42	10.44	12.19	10.81	10.81	11.85	11.77
ADAP2	LAT	295	157	156	481	794	0.000	10.25	11.14	5.86	7.69	7.47	8.32	8.65	8.92	6.87	6.97
ATOX1	LAT	577	604	693	702	833	0.116	10.15	11.14	9.86	7.69	11.07	8.32	9.45	8.92	8.97	6.97
C1QA	LAT	308	62	20	327	556	0.000	10.63	11.14	7.16	7.69	9.61	8.32	12.90	8.92	8.16	6.97
DAB2	LAT	536	395	95	411	809	0.000	10.19	11.14	7.96	7.69	9.53	8.32	12.96	8.92	10.09	6.97
IRF8	LAT	614	103	28	571	635	0.071	11.63	11.14	5.25	7.69	9.65	8.32	10.22	8.92	5.73	6.97
BCL6B	LATS2	103	875	731	677	260	0.177	4.76	10.21	6.88	6.80	7.47	9.54	10.71	10.90	8.64	11.13
FAM65A	LATS2	451	195	932	884	737	0.458	11.51	10.21	12.35	6.80	10.62	9.54	12.71	10.90	11.34	11.13
ENC1	LBH	800	866	283	510	250	0.010	10.04	10.01	14.75	6.27	10.33	7.61	9.57	11.41	8.46	8.17
FXYD1	LBH	552	22	44	551	520	0.067	6.66	10.01	11.46	6.27	12.00	7.61	9.40	11.41	13.11	8.17
F11R	LCLAT1	893	386	554	549	276	0.049	12.28	8.60	8.53	6.96	12.90	8.67	13.40	7.98	9.37	8.42
JUP	LCLAT1	71	110	696	777	334	0.456	9.59	8.60	9.46	6.96	12.57	8.67	12.60	7.98	12.64	8.42
F11R	LCMT2	798	165	865	181	490	0.000	12.28	7.86	8.53	7.28	12.90	8.16	13.40	6.75	9.37	8.37
JMJD7	LCMT2	801	725	897	862	822	0.119	9.55	7.86	8.78	7.28	8.87	8.16	9.09	6.75	8.70	8.37
ACP2	LCP1	594	22	848	791	574	0.352	10.17	17.49	10.30	6.72	12.20	11.25	10.28	13.38	9.52	8.29
APOE	LCP1	18	147	118	391	437	0.000	8.26	17.49	14.36	6.72	16.57	11.25	12.62	13.38	8.73	8.29
ANGPTL4	LDHA	326	292	793	830	155	0.513	6.89	14.32	9.56	13.25	12.55	14.74	9.98	14.06	9.43	14.80
AEBP1	LDLRAD4	290	12	154	431	137	0.000	9.24	9.44	11.07	10.81	11.28	9.85	14.79	8.78	10.88	9.08
CD74	LDLRAD4	194	218	209	822	133	0.644	16.09	9.44	11.52	10.81	13.32	9.85	16.98	8.78	12.63	9.08
ENTPD1	LDLRAD4	869	727	449	841	322	0.398	12.63	9.44	10.25	10.81	9.37	9.85	11.59	8.78	9.95	9.08
GAS6	LDLRAD4	667	742	319	881	16	0.557	9.58	9.44	11.63	10.81	11.81	9.85	13.26	8.78	12.58	9.08
GGTA1P	LDLRAD4	405	421	180	879	447	0.758	8.62	9.44	8.03	10.81	6.10	9.85	7.50	8.78	7.13	9.08
HLA-DMB	LDLRAD4	562	262	249	821	75	0.611	11.24	9.44	5.70	10.81	7.71	9.85	11.23	8.78	7.73	9.08
INPP5D	LDLRAD4	759	271	206	466	127	0.000	14.00	9.44	9.07	10.81	9.11	9.85	11.41	8.78	8.78	9.08
CTNNBIP1	LDLRAP1	877	276	844	727	308	0.227	9.76	11.32	10.87	8.94	9.26	11.12	10.07	10.43	9.33	9.97
FBXO42	LDLRAP1	772	440	959	954	946	0.322	10.98	11.32	10.21	8.94	9.96	11.12	10.19	10.43	11.04	9.97
COL1A1	LEPRE1	363	213	683	802	799	0.363	8.40	10.42	6.87	8.75	11.90	10.92	14.71	10.59	10.66	8.92
COPZ2	LEPRE1	787	430	405	735	854	0.235	7.28	10.42	6.55	8.75	9.66	10.92	8.42	10.59	10.75	8.92
FSTL1	LEPRE1	318	602	593	707	915	0.213	8.75	10.42	10.39	8.75	11.17	10.92	14.56	10.59	11.59	8.92
GLI3	LEPRE1	572	236	591	684	984	0.195	4.78	10.42	8.04	8.75	5.65	10.92	9.18	10.59	8.04	8.92
BMP1	LGALS1	476	134	724	371	440	0.000	8.85	12.94	9.37	11.92	11.78	11.12	11.50	13.42	10.18	12.98
COPZ2	LGALS1	365	408	764	919	733	0.590	7.28	12.94	6.55	11.92	9.66	11.12	8.42	13.42	10.75	12.98
ABCC3	LGALS3BP	547	285	346	536	604	0.036	10.18	10.16	5.37	10.73	14.13	12.43	11.09	13.85	5.97	10.06
ALDH2	LGALS3BP	384	657	463	890	535	0.684	12.31	10.16	14.12	10.73	15.62	12.43	13.79	13.85	13.17	10.06
FLJ23867	LGALS3BP	101	108	96	50	47	0.000	0.00	10.16	0.00	10.73	0.00	12.43	0.00	13.85	0.00	10.06
FMNL1	LHFPL2	321	341	783	331	932	0.000	14.54	9.78	11.04	8.58	8.82	7.45	12.03	11.10	8.26	8.54
GMNN	LIG1	718	444	951	903	672	0.409	8.00	10.40	8.02	8.99	8.70	9.57	7.41	9.40	7.73	8.40
GTSE1	LIG1	853	578	834	726	502	0.186	7.44	10.40	2.67	8.99	4.54	9.57	4.58	9.40	3.86	8.40
APOE	LILRB1	316	135	107	231	662	0.000	8.26	11.36	14.36	5.07	16.57	7.76	12.62	9.38	8.73	5.27
APOE	LILRB3	8	139	73	136	382	0.000	8.26	12.42	14.36	2.23	16.57	5.95	12.62	7.77	8.73	4.65
CTSL	LILRB3	52	367	854	685	685	0.185	10.58	12.42	10.41	2.23	12.48	5.95	12.87	7.77	11.25	4.65
EVL	LILRB3	11	40	691	190	222	0.000	12.73	12.42	13.78	2.23	12.91	5.95	12.35	7.77	10.51	4.65
IRF8	LILRB3	433	582	740	434	637	0.000	11.63	12.42	5.25	2.23	9.65	5.95	10.22	7.77	5.73	4.65
LHFPL2	LILRB3	826	594	827	560	569	0.000	9.78	12.42	8.58	2.23	7.45	5.95	11.10	7.77	8.54	4.65
ARRB1	LIMD1	862	189	611	891	224	0.545	11.24	10.24	11.27	7.51	8.65	10.76	11.25	11.46	8.61	11.32
CABLES1	LIMD1	644	458	773	923	616	0.580	6.43	10.24	11.89	7.51	9.34	10.76	9.38	11.46	7.16	11.32
CAT	LIMD1	391	852	347	875	822	0.413	13.04	10.24	10.23	7.51	14.24	10.76	12.43	11.46	12.34	11.32
GPD1L	LIMD1	979	270	694	870	105	0.458	9.40	10.24	11.02	7.51	7.49	10.76	10.99	11.46	13.46	11.32
C7orf49	LIMK1	920	322	995	878	789	0.234	10.23	11.16	6.79	13.08	8.59	8.29	8.47	10.07	9.92	10.45
ATP13A3	LIMK2	677	490	508	919	793	0.599	11.09	13.94	10.35	10.25	12.83	10.80	12.31	12.07	11.02	10.38
DRG1	LIMK2	543	202	852	160	840	0.000	10.34	13.94	10.40	10.25	10.26	10.80	9.77	12.07	11.95	10.38
EWSR1	LIMK2	811	456	797	572	813	0.036	12.96	13.94	12.64	10.25	13.02	10.80	13.17	12.07	12.79	10.38
GAS7	LIMS2	164	60	277	368	594	0.000	13.36	8.60	14.35	10.10	7.49	11.16	11.95	12.85	9.20	10.65
HEG1	LIMS2	496	882	221	792	775	0.300	9.15	8.60	10.18	10.10	9.12	11.16	13.23	12.85	10.30	10.65
ILK	LIMS2	494	550	631	799	936	0.358	12.51	8.60	11.44	10.10	11.41	11.16	12.69	12.85	11.63	10.65
LATS2	LIMS2	307	422	473	546	633	0.069	10.21	8.60	6.80	10.10	9.54	11.16	10.90	12.85	11.13	10.65
ANXA6	LINC00341	119	16	280	715	660	0.350	13.34	9.93	13.41	6.74	13.42	8.42	13.49	8.72	13.33	8.05
AP1S2	LINC00341	871	64	59	817	371	0.475	10.84	9.93	10.40	6.74	8.09	8.42	9.86	8.72	11.74	8.05
CHMP1B	LINC00667	865	682	527	865	587	0.400	11.51	9.16	10.21	10.12	10.15	10.61	10.67	10.12	13.75	10.80
CABLES1	LINC00909	41	82	857	852	651	0.453	6.43	8.73	11.89	8.38	9.34	8.17	9.38	7.27	7.16	8.97
CXXC1	LINC00909	415	743	839	967	824	0.481	11.52	8.73	11.06	8.38	11.37	8.17	11.06	7.27	10.54	8.97
ACP2	LIPA	937	574	967	891	905	0.159	10.17	11.54	10.30	10.35	12.20	11.32	10.28	11.92	9.52	9.22
ATP6V0C	LIPA	161	347	911	808	624	0.400	14.12	11.54	14.26	10.35	12.30	11.32	12.91	11.92	12.61	9.22
BTN2A2	LIPA	728	196	825	135	969	0.000	9.71	11.54	6.53	10.35	8.15	11.32	9.79	11.92	7.49	9.22
GLRX	LIPA	366	461	854	731	317	0.346	11.63	11.54	9.51	10.35	11.75	11.32	10.95	11.92	13.06	9.22
CD180	LITAF	484	544	626	63	235	0.000	9.57	15.71	2.72	10.10	5.00	12.33	5.77	13.64	3.21	10.82
CD4	LITAF	120	328	14	471	371	0.000	12.14	15.71	8.27	10.10	11.68	12.33	12.30	13.64	7.15	10.82
CD40	LITAF	203	546	580	886	724	0.597	9.40	15.71	6.30	10.10	9.22	12.33	10.51	13.64	8.76	10.82
HIVEP3	LITAF	46	84	755	917	439	0.707	8.90	15.71	9.75	10.10	7.64	12.33	9.52	13.64	8.11	10.82
ABLIM3	LIX1L	514	140	298	906	874	0.618	9.59	10.66	11.06	9.23	13.51	9.64	11.40	10.37	11.98	11.30
GNG2	LIX1L	942	205	797	919	31	0.480	12.13	10.66	10.78	9.23	7.63	9.64	8.88	10.37	7.29	11.30
IGFBP4	LIX1L	197	399	671	740	249	0.395	9.15	10.66	10.00	9.23	15.82	9.64	14.91	10.37	12.06	11.30
ARHGAP1	LMAN1	149	552	610	719	894	0.247	11.90	10.09	12.00	9.98	11.96	13.69	12.04	12.28	11.13	11.76
ICAM2	LMBRD1	36	470	723	865	760	0.488	10.62	11.26	6.48	11.07	6.26	11.37	9.55	10.86	8.59	10.69
APTX	LMNB2	922	945	787	934	929	0.082	9.44	10.07	9.32	10.21	10.11	9.32	9.26	10.43	9.31	10.71
CORO1C	LMNB2	409	830	898	830	855	0.165	12.04	10.07	11.17	10.21	11.44	9.32	13.02	10.43	11.37	10.71
CTPS1	LMNB2	997	900	433	993	979	0.300	9.54	10.07	9.54	10.21	11.61	9.32	9.69	10.43	10.26	10.71
EPT1	LMNB2	920	833	774	774	878	0.000	8.79	10.07	10.37	10.21	11.34	9.32	9.83	10.43	10.43	10.71
KPNA1	LMNB2	499	874	912	761	862	0.131	11.33	10.07	10.72	10.21	10.87	9.32	10.73	10.43	12.74	10.71
GAS6	LMO2	778	262	220	758	692	0.291	9.58	11.06	11.63	9.56	11.81	7.60	13.26	10.53	12.58	10.35
GRK5	LMO2	372	366	807	901	659	0.569	10.32	11.06	9.23	9.56	9.60	7.60	12.38	10.53	9.63	10.35
DDR1	LMTK2	518	3	645	929	737	0.658	8.38	10.82	12.96	11.95	8.82	10.44	11.84	10.60	11.55	11.14
DAB2	LOC100129034	0	0	0	0	0	0.000	10.19	0.00	7.96	0.00	9.53	0.00	12.96	0.00	10.09	0.00
AEBP2	LOC100129361	0	0	0	0	0	0.000	9.22	0.00	8.73	0.00	9.08	0.00	9.52	0.00	9.62	0.00
IPO8	LOC100129361	0	0	0	0	0	0.000	10.48	0.00	10.53	0.00	11.02	0.00	10.81	0.00	11.06	0.00
KDM5A	LOC100129361	0	0	0	0	0	0.000	11.95	0.00	9.25	0.00	10.64	0.00	11.23	0.00	10.54	0.00
BCL2L1	LOC100862671	0	0	0	0	0	0.000	13.65	0.00	12.01	0.00	12.21	0.00	12.90	0.00	11.39	0.00
CAB39	LOC100862671	0	0	0	0	0	0.000	12.72	0.00	12.00	0.00	11.15	0.00	11.94	0.00	13.20	0.00
CLTB	LOC100862671	0	0	0	0	0	0.000	11.41	0.00	12.41	0.00	11.09	0.00	11.53	0.00	12.79	0.00
IFNGR2	LOC100862671	0	0	0	0	0	0.000	12.94	0.00	9.98	0.00	10.21	0.00	11.01	0.00	9.78	0.00
CCDC14	LOC101927166	0	0	0	0	0	0.000	9.00	0.00	10.49	0.00	11.01	0.00	11.60	0.00	10.20	0.00
ATP6V0D1	LOC158960	0	0	0	0	0	0.000	13.64	0.00	12.71	0.00	11.55	0.00	12.10	0.00	12.12	0.00
C21orf2	LOC158960	0	0	0	0	0	0.000	10.02	0.00	10.67	0.00	9.98	0.00	9.71	0.00	9.20	0.00
CRYM	LOC158960	0	0	0	0	0	0.000	5.86	0.00	11.89	0.00	8.20	0.00	5.16	0.00	5.09	0.00
AGBL5	LOC93622	0	0	0	0	0	0.000	9.48	0.00	9.46	0.00	8.76	0.00	9.00	0.00	9.01	0.00
C19orf70	LPAR2	449	555	759	677	618	0.179	9.70	13.25	10.56	7.45	10.35	7.66	9.50	9.90	11.25	6.05
FARSA	LPAR2	264	660	683	649	670	0.074	10.63	13.25	11.62	7.45	10.82	7.66	9.94	9.90	11.16	6.05
GADD45GIP1	LPAR2	218	600	729	684	531	0.210	10.03	13.25	10.36	7.45	10.52	7.66	9.45	9.90	11.05	6.05
GCDH	LPAR2	240	316	76	623	481	0.246	9.95	13.25	9.16	7.45	12.05	7.66	8.73	9.90	10.20	6.05
AK1	LPCAT1	589	772	969	848	526	0.329	10.63	13.23	11.71	11.33	10.92	9.78	11.47	13.90	13.90	8.88
ARSD	LPCAT1	309	348	133	917	918	0.625	10.03	13.23	7.62	11.33	11.49	9.78	9.70	13.90	7.24	8.88
CPM	LPCAT1	177	150	794	977	726	0.694	9.80	13.23	8.32	11.33	10.68	9.78	11.99	13.90	9.33	8.88
CTSH	LPCAT1	420	264	279	1000	733	0.883	12.52	13.23	10.70	11.33	11.84	9.78	13.68	13.90	9.48	8.88
ITPR3	LPCAT1	879	416	901	962	998	0.303	10.94	13.23	10.05	11.33	9.19	9.78	13.54	13.90	10.22	8.88
ATP1A1	LPCAT3	289	680	937	989	846	0.496	12.75	11.35	14.66	8.38	12.79	12.22	15.05	11.06	12.75	10.99
CD9	LPCAT3	489	601	438	926	563	0.770	10.34	11.35	10.82	8.38	10.61	12.22	13.33	11.06	10.75	10.99
ARAP1	LPXN	652	654	576	923	862	0.474	14.17	11.68	11.21	7.10	11.58	8.89	13.05	9.82	10.46	7.67
C19orf59	LPXN	72	54	21	848	79	0.696	13.16	11.68	2.26	7.10	4.81	8.89	10.23	9.82	3.80	7.67
C19orf66	LPXN	980	669	883	779	912	0.055	10.74	11.68	10.46	7.10	12.95	8.89	10.18	9.82	7.86	7.67
CD79A	LPXN	785	321	425	557	558	0.057	11.51	11.68	1.87	7.10	5.22	8.89	6.01	9.82	3.79	7.67
CTSD	LPXN	696	659	233	886	473	0.595	15.56	11.68	13.77	7.10	15.00	8.89	15.94	9.82	14.40	7.67
FTL	LPXN	536	367	722	846	814	0.406	18.59	11.68	16.19	7.10	17.22	8.89	18.59	9.82	14.18	7.67
GPX1	LPXN	415	433	484	872	841	0.574	13.80	11.68	11.51	7.10	13.18	8.89	12.85	9.82	11.27	7.67
IGFLR1	LPXN	690	455	125	947	662	0.718	11.59	11.68	6.18	7.10	10.56	8.89	8.44	9.82	7.50	7.67
IL3RA	LPXN	696	429	604	632	737	0.080	9.45	11.68	6.30	7.10	6.28	8.89	9.88	9.82	8.38	7.67
ARSD	LRBA	164	590	673	958	503	0.783	10.03	9.79	7.62	9.10	11.49	10.60	9.70	10.53	7.24	10.10
CD3EAP	LRFN4	802	860	881	704	676	0.014	5.67	8.22	5.88	9.84	6.12	6.45	4.80	7.94	7.46	8.57
COX5A	LRFN4	940	861	753	932	516	0.333	10.86	8.22	11.96	9.84	11.92	6.45	10.65	7.94	13.74	8.57
EIF4EBP1	LRFN4	857	144	653	887	501	0.518	10.27	8.22	5.74	9.84	10.68	6.45	9.06	7.94	10.77	8.57
GLRX2	LRFN4	779	666	832	922	678	0.366	7.99	8.22	7.66	9.84	8.25	6.45	6.41	7.94	8.98	8.57
IFT172	LRIG1	980	158	126	811	302	0.467	8.61	9.20	11.09	12.07	9.19	11.38	9.91	11.05	9.90	11.89
ACAP1	LRMP	688	29	722	780	668	0.271	13.89	11.72	5.01	8.05	8.36	6.97	10.03	8.39	7.66	6.10
DERL3	LRMP	175	161	512	452	287	0.000	9.07	11.72	6.02	8.05	7.95	6.97	7.73	8.39	7.07	6.10
ANKH	LRP1	171	675	798	951	447	0.665	10.99	12.30	12.55	14.40	11.70	14.99	10.76	15.71	12.06	12.54
ARHGAP17	LRP1	803	589	787	915	849	0.316	10.30	12.30	8.56	14.40	9.51	14.99	10.59	15.71	10.67	12.54
COL1A1	LRP1	306	347	523	638	977	0.196	8.40	12.30	6.87	14.40	11.90	14.99	14.71	15.71	10.66	12.54
CRTC3	LRP1	760	482	619	881	436	0.573	11.17	12.30	10.48	14.40	10.63	14.99	11.75	15.71	11.11	12.54
ESYT1	LRP1	593	740	823	954	707	0.476	11.83	12.30	11.05	14.40	12.42	14.99	12.45	15.71	11.90	12.54
HEG1	LRP1	479	355	852	793	756	0.311	9.15	12.30	10.18	14.40	9.12	14.99	13.23	15.71	10.30	12.54
HVCN1	LRP1	563	471	799	750	489	0.344	10.24	12.30	6.78	14.40	5.32	14.99	6.89	15.71	7.76	12.54
HDDC3	LRRC28	907	824	535	938	844	0.321	8.33	9.68	7.09	9.26	7.83	10.20	5.91	8.11	7.51	9.83
IRF6	LRRC4	2	181	397	827	290	0.654	6.90	10.69	4.42	11.78	10.87	5.91	8.74	6.72	5.72	6.20
KDM4A	LRRC47	998	997	863	999	943	0.098	10.39	10.31	9.91	11.32	10.10	11.38	9.79	10.42	9.90	12.68
AP2M1	LRRC58	431	493	858	957	938	0.516	13.46	9.50	14.96	9.97	12.91	10.04	13.65	10.30	12.83	9.99
EEF2	LRRC75A-AS1	0	0	0	0	0	0.000	16.28	0.00	17.05	0.00	15.47	0.00	16.50	0.00	16.31	0.00
FARSA	LRRC75A-AS1	0	0	0	0	0	0.000	10.63	0.00	11.62	0.00	10.82	0.00	9.94	0.00	11.16	0.00
BICD2	LRRC8A	640	365	955	719	941	0.149	11.56	10.48	10.60	12.88	10.01	11.51	11.23	12.50	11.16	10.40
APOE	LRRC8C	146	141	458	266	603	0.000	8.26	10.33	14.36	8.58	16.57	7.21	12.62	9.85	8.73	8.84
CTSB	LRRC8C	557	789	796	360	422	0.000	14.59	10.33	14.05	8.58	14.91	7.21	15.69	9.85	13.53	8.84
DYSF	LRRC8C	197	290	537	466	386	0.000	14.81	10.33	9.96	8.58	11.29	7.21	11.88	9.85	13.26	8.84
KIAA1432	LRRC8C	917	757	806	986	208	0.482	10.54	10.33	8.97	8.58	10.05	7.21	10.75	9.85	11.22	8.84
LGALS1	LRRC8C	564	504	896	580	522	0.075	12.94	10.33	11.92	8.58	11.12	7.21	13.42	9.85	12.98	8.84
EPAS1	LRRFIP1	549	425	976	814	763	0.315	9.57	12.63	12.89	11.34	13.73	11.86	17.49	13.01	12.61	12.80
ATP6V0E1	LRRK2	921	304	270	913	294	0.620	13.70	12.74	10.28	9.75	12.07	8.75	12.66	12.48	11.79	9.89
CAT	LRRK2	867	355	959	947	751	0.361	13.04	12.74	10.23	9.75	14.24	8.75	12.43	12.48	12.34	9.89
HLA-DMA	LRRK2	17	306	796	504	843	0.004	11.56	12.74	6.73	9.75	8.90	8.75	12.02	12.48	8.66	9.89
HLA-DOA	LRRK2	63	274	726	379	687	0.000	10.15	12.74	4.67	9.75	6.87	8.75	9.91	12.48	6.18	9.89
BUD31	LRWD1	637	862	956	920	934	0.171	10.28	11.18	9.42	9.46	9.04	9.41	9.20	8.82	8.98	9.40
EIF4EBP1	LSM1	662	541	889	930	831	0.399	10.27	8.52	5.74	7.78	10.68	8.32	9.06	7.57	10.77	8.85
CHAF1A	LSM5	908	650	976	961	502	0.411	9.43	8.53	8.20	8.54	7.93	9.59	7.87	8.56	9.76	9.77
ARMC6	LSM7	928	860	557	977	960	0.301	10.18	9.65	9.94	8.76	11.78	9.41	9.17	8.90	10.00	9.31
CDCA4	LSM7	939	704	901	976	867	0.246	8.56	9.65	4.77	8.76	6.78	9.41	6.79	8.90	6.31	9.31
APOE	LST1	14	141	300	462	749	0.000	8.26	12.78	14.36	4.75	16.57	7.21	12.62	8.89	8.73	5.02
ABCA3	LTA4H	215	926	940	888	938	0.194	8.87	13.42	12.96	10.15	7.45	10.45	13.89	12.74	10.00	11.06
ACADS	LTA4H	503	325	549	922	758	0.689	10.09	13.42	9.05	10.15	13.50	10.45	9.30	12.74	12.57	11.06
AGPAT2	LTA4H	952	658	457	967	663	0.547	11.77	13.42	8.54	10.15	13.80	10.45	11.21	12.74	10.14	11.06
AK1	LTA4H	11	714	907	877	661	0.378	10.63	13.42	11.71	10.15	10.92	10.45	11.47	12.74	13.90	11.06
C2	LTA4H	357	835	974	947	610	0.448	8.88	13.42	6.16	10.15	14.70	10.45	11.67	12.74	7.04	11.06
CACNA2D2	LTA4H	22	813	433	874	603	0.540	8.53	13.42	9.49	10.15	5.92	10.45	11.55	12.74	7.82	11.06
APOE	LTB	27	690	557	346	743	0.000	8.26	12.40	14.36	3.61	16.57	6.30	12.62	6.57	8.73	3.95
CD4	LTB	600	347	590	592	556	0.065	12.14	12.40	8.27	3.61	11.68	6.30	12.30	6.57	7.15	3.95
CTSB	LTB	418	278	545	224	228	0.000	14.59	12.40	14.05	3.61	14.91	6.30	15.69	6.57	13.53	3.95
IRF8	LTB	501	63	303	352	511	0.000	11.63	12.40	5.25	3.61	9.65	6.30	10.22	6.57	5.73	3.95
DIP2C	LTBP1	249	357	453	881	324	0.762	6.76	8.25	11.03	8.18	10.38	9.89	9.73	12.03	11.82	10.17
HEBP2	LTV1	770	279	699	747	912	0.147	11.77	9.15	8.87	8.70	11.97	9.93	10.73	9.76	12.07	10.58
BACH2	LUZP1	938	568	379	730	422	0.311	8.99	9.21	7.43	11.72	8.66	9.06	8.37	11.09	9.36	9.11
ECE1	LUZP1	195	311	779	912	862	0.503	13.32	9.21	11.33	11.72	12.72	9.06	13.60	11.09	11.08	9.11
ITGA5	LUZP1	570	73	951	874	889	0.339	13.21	9.21	7.77	11.72	12.02	9.06	13.88	11.09	11.23	9.11
ITPRIP	LUZP1	675	88	919	779	739	0.211	13.16	9.21	7.01	11.72	9.05	9.06	11.97	11.09	9.71	9.11
APOE	LY86	43	50	288	811	584	0.580	8.26	10.62	14.36	4.56	16.57	5.22	12.62	7.42	8.73	3.28
C19orf59	LY86	485	396	694	848	172	0.599	13.16	10.62	2.26	4.56	4.81	5.22	10.23	7.42	3.80	3.28
CYP27A1	LY86	657	360	100	948	319	0.818	10.83	10.62	10.07	4.56	14.61	5.22	12.12	7.42	10.70	3.28
IFFO1	LY86	852	376	416	687	533	0.264	11.53	10.62	11.27	4.56	10.44	5.22	10.92	7.42	10.23	3.28
IQSEC1	LY86	607	277	699	423	343	0.000	13.42	10.62	14.11	4.56	12.01	5.22	12.13	7.42	11.39	3.28
KCNJ5	LY86	101	708	843	850	672	0.339	3.30	10.62	4.25	4.56	3.09	5.22	6.52	7.42	3.96	3.28
C20orf27	LYAR	446	330	598	925	721	0.691	11.03	10.03	10.46	6.62	9.43	8.42	9.28	8.50	9.49	9.59
EIF4A3	LYPD3	610	293	210	562	363	0.093	11.92	7.11	9.85	3.90	10.54	5.35	11.12	5.04	10.56	4.73
FKBP15	LYSMD2	688	620	676	842	718	0.333	12.58	9.64	10.52	10.03	10.83	8.80	11.80	8.20	10.90	8.43
DNAJC11	LZIC	671	765	981	987	986	0.273	9.45	9.48	10.01	8.67	10.20	8.90	9.46	8.12	10.81	9.44
APOE	M6PR	176	103	320	563	228	0.126	8.26	11.58	14.36	9.65	16.57	10.08	12.62	11.19	8.73	10.55
CMTM6	M6PR	611	512	653	992	873	0.659	12.87	11.58	8.19	9.65	12.51	10.08	11.43	11.19	8.55	10.55
GLUL	M6PR	310	228	429	756	754	0.385	16.05	11.58	17.85	9.65	14.08	10.08	16.28	11.19	16.03	10.55
LPCAT3	M6PR	615	872	976	992	915	0.295	11.35	11.58	8.38	9.65	12.22	10.08	11.06	11.19	10.99	10.55
ARHGEF17	MACF1	378	567	727	878	920	0.420	8.33	12.54	12.91	14.53	9.98	13.06	13.02	15.82	11.02	12.99
GUCY1A3	MACF1	421	326	756	604	889	0.104	6.77	12.54	8.59	14.53	8.17	13.06	9.91	15.82	8.44	12.99
KANK2	MACF1	46	642	644	959	797	0.626	8.98	12.54	9.99	14.53	11.88	13.06	13.70	15.82	11.73	12.99
DBN1	MAD2L2	495	633	746	827	885	0.301	10.69	10.87	12.63	9.01	7.90	10.15	10.99	9.35	10.81	10.17
GLI3	MAF	767	375	544	733	431	0.328	4.78	10.05	8.04	9.82	5.65	11.87	9.18	11.77	8.04	11.72
HVCN1	MAF	266	258	736	668	219	0.252	10.24	10.05	6.78	9.82	5.32	11.87	6.89	11.77	7.76	11.72
IFFO1	MAF	681	431	917	845	578	0.388	11.53	10.05	11.27	9.82	10.44	11.87	10.92	11.77	10.23	11.72
ADAM19	MAFB	406	574	1	12	4	0.000	12.45	11.39	8.38	8.22	9.65	10.88	10.55	10.91	8.32	9.95
APOE	MAFB	378	112	504	595	87	0.188	8.26	11.39	14.36	8.22	16.57	10.88	12.62	10.91	8.73	9.95
COL1A1	MAFB	230	270	186	430	29	0.000	8.40	11.39	6.87	8.22	11.90	10.88	14.71	10.91	10.66	9.95
ITGA5	MAFB	468	415	47	67	547	0.000	13.21	11.39	7.77	8.22	12.02	10.88	13.88	10.91	11.23	9.95
JAK3	MAFB	302	772	13	194	47	0.000	14.18	11.39	8.99	8.22	8.48	10.88	10.98	10.91	7.03	9.95
LEPRE1	MAGED1	940	615	683	880	668	0.337	10.42	9.90	8.75	13.19	10.92	12.23	10.59	11.92	8.92	11.30
KLHL24	MAGEF1	596	503	623	465	606	0.000	11.22	8.06	10.37	10.59	10.93	9.77	11.49	9.55	12.50	9.84
CABLES1	MAGEH1	476	20	599	822	817	0.436	6.43	8.10	11.89	10.79	9.34	8.89	9.38	9.47	7.16	8.46
CADM1	MAGEH1	554	412	836	827	272	0.464	6.96	8.10	11.53	10.79	10.54	8.89	11.34	9.47	8.66	8.46
EFEMP2	MAGEH1	486	23	630	818	924	0.412	9.81	8.10	10.23	10.79	9.16	8.89	11.74	9.47	9.95	8.46
CSTF2	MAGOH	856	927	975	980	932	0.115	8.62	9.41	7.77	8.17	7.60	9.48	7.60	8.87	7.99	9.29
C7orf50	MALSU1	368	707	498	953	912	0.597	9.97	9.28	11.56	8.46	10.34	9.76	10.22	8.44	10.52	10.41
CANX	MAML1	675	658	353	824	925	0.320	12.69	11.58	13.36	10.37	14.28	10.66	14.34	11.31	13.24	10.90
ARHGEF6	MAN1A1	899	422	352	721	18	0.332	11.94	11.60	10.49	8.42	8.77	13.54	11.28	12.14	11.80	9.85
CD4	MAN1A1	43	401	174	666	857	0.249	12.14	11.60	8.27	8.42	11.68	13.54	12.30	12.14	7.15	9.85
FOLR2	MAN1A1	138	629	629	701	840	0.172	8.67	11.60	4.81	8.42	6.89	13.54	8.58	12.14	7.05	9.85
LAIR1	MAN1A1	730	222	517	437	860	0.000	12.34	11.60	5.85	8.42	7.48	13.54	11.06	12.14	6.67	9.85
BTG2	MAN1C1	777	417	279	269	232	0.000	12.52	8.83	10.85	10.92	9.57	10.67	13.09	9.86	13.09	8.45
HLA-G	MAN2A1	252	253	357	428	47	0.000	7.58	9.31	1.15	7.97	2.89	9.61	5.81	9.13	2.91	9.27
APOE	MAN2B1	116	306	628	883	613	0.645	8.26	12.93	14.36	8.84	16.57	11.12	12.62	12.22	8.73	10.17
COQ10B	MAP2K3	586	643	786	733	164	0.235	10.39	13.77	9.30	9.09	10.07	12.17	9.54	11.90	9.42	12.30
EPN2	MAP2K4	573	490	838	937	902	0.468	8.25	10.83	11.37	11.87	8.81	10.30	10.04	9.86	10.08	11.01
KIF1C	MAP2K4	655	14	939	941	908	0.381	11.02	10.83	13.37	11.87	13.19	10.30	13.58	9.86	15.45	11.01
CLK3	MAP2K5	827	629	801	825	964	0.110	12.55	9.68	10.43	10.09	10.82	9.26	11.14	9.02	11.06	10.32
ENTPD1	MAP3K12	94	752	978	793	797	0.167	12.63	9.64	10.25	11.58	9.37	7.81	11.59	10.35	9.95	8.40
LIX1L	MAP3K12	795	206	863	831	497	0.349	10.66	9.64	9.23	11.58	9.64	7.81	10.37	10.35	11.30	8.40
MAN1C1	MAP3K3	343	792	304	735	355	0.352	8.83	13.02	10.92	10.00	10.67	10.37	9.86	11.81	8.45	10.98
ARHGEF17	MAP4	410	182	630	952	571	0.803	8.33	11.38	12.91	15.05	9.98	12.82	13.02	14.21	11.02	15.59
DCHS1	MAP4	802	491	892	910	300	0.473	8.18	11.38	9.99	15.05	7.99	12.82	11.29	14.21	8.87	15.59
FBLIM1	MAP4K4	95	368	558	825	519	0.612	5.78	13.19	5.86	12.90	8.75	11.35	11.52	11.97	8.50	11.83
CCDC86	MAP6D1	499	654	276	592	2	0.138	8.66	7.21	8.09	10.86	8.38	6.04	7.98	4.87	9.88	8.90
DPH2	MAP6D1	643	891	477	827	5	0.419	9.68	7.21	9.57	10.86	9.74	6.04	9.04	4.87	10.95	8.90
CSF1	MAP7D1	445	21	947	894	583	0.549	9.75	13.01	9.52	13.65	10.57	10.03	12.27	12.93	10.02	13.99
LRRC8A	MAP7D1	668	158	937	815	792	0.242	10.48	13.01	12.88	13.65	11.51	10.03	12.50	12.93	10.40	13.99
APH1A	MAPK14	746	677	905	913	916	0.205	12.42	13.60	11.17	10.66	12.75	12.04	12.45	11.84	11.31	11.35
KLF3	MAPK14	434	680	663	865	948	0.376	12.12	13.60	10.04	10.66	11.58	12.04	11.64	11.84	10.58	11.35
GNPNAT1	MAPK1IP1L	750	929	777	945	869	0.228	7.19	11.40	6.79	10.69	10.26	11.13	7.43	11.67	8.76	11.29
KIAA0586	MAPK1IP1L	685	945	986	939	884	0.154	9.09	11.40	7.97	10.69	8.81	11.13	8.30	11.67	9.24	11.29
EPN2	MAPK7	542	756	910	781	972	0.132	8.25	10.81	11.37	8.65	8.81	8.75	10.04	10.31	10.08	9.11
HNRNPF	MAPK8	961	378	944	884	810	0.229	12.68	9.53	10.54	10.66	13.00	10.44	12.81	10.05	12.10	10.40
FPGS	MAPKAP1	466	465	795	965	858	0.604	10.71	11.03	9.71	11.82	12.20	11.34	11.48	11.17	11.40	12.22
ISY1	MAPKAP1	997	905	986	1000	1000	0.056	11.12	11.03	9.29	11.82	9.52	11.34	9.86	11.17	10.30	12.22
ADK	MAPKAPK3	546	506	756	992	825	0.667	9.38	12.37	8.69	9.22	11.59	10.28	9.31	10.77	9.63	13.28
ARHGEF3	MAPKAPK3	491	15	383	272	611	0.000	10.98	12.37	10.85	9.22	7.58	10.28	10.63	10.77	9.47	13.28
FPGS	MAPKAPK3	288	547	790	966	684	0.671	10.71	12.37	9.71	9.22	12.20	10.28	11.48	10.77	11.40	13.28
EXT1	MAPKBP1	282	872	708	612	858	0.056	10.59	9.79	8.85	11.42	11.74	9.07	11.39	9.81	8.74	9.59
EDC3	MAPRE1	935	298	830	736	973	0.118	10.39	12.33	10.02	10.78	9.76	9.74	9.63	11.99	10.07	11.05
ARHGEF10	MAPRE2	817	296	828	864	442	0.406	7.28	11.44	10.76	12.99	8.43	10.78	12.15	11.24	9.12	11.73
ARHGEF40	MAPRE2	39	53	330	878	425	0.756	12.31	11.44	10.53	12.99	12.32	10.78	11.68	11.24	10.77	11.73
ARHGEF6	MAPRE2	809	339	842	926	580	0.486	11.94	11.44	10.49	12.99	8.77	10.78	11.28	11.24	11.80	11.73
CABLES1	MAPRE2	713	26	613	821	501	0.478	6.43	11.44	11.89	12.99	9.34	10.78	9.38	11.24	7.16	11.73
EPAS1	MAPRE2	425	234	887	686	154	0.279	9.57	11.44	12.89	12.99	13.73	10.78	17.49	11.24	12.61	11.73
ESAM	MAPRE2	195	171	873	887	418	0.588	9.49	11.44	9.85	12.99	9.21	10.78	13.19	11.24	10.52	11.73
FRY	MAPRE2	770	985	908	967	541	0.341	10.73	11.44	11.06	12.99	10.32	10.78	11.15	11.24	10.83	11.73
GRK5	MAPRE2	991	888	925	778	543	0.117	10.32	11.44	9.23	12.99	9.60	10.78	12.38	11.24	9.63	11.73
IGFBP7	MAPRE2	561	130	845	698	329	0.267	10.42	11.44	11.28	12.99	12.67	10.78	14.10	11.24	11.84	11.73
IL11RA	MAPRE2	978	411	210	776	531	0.399	10.19	11.44	9.85	12.99	11.03	10.78	9.90	11.24	9.78	11.73
KIAA0355	MAPRE2	955	555	701	931	352	0.518	9.65	11.44	9.62	12.99	10.21	10.78	11.23	11.24	11.25	11.73
AP3B1	MAT2B	991	510	697	975	990	0.371	11.06	11.63	9.39	10.73	9.63	11.07	10.43	11.12	10.25	11.03
CTSS	MAT2B	971	497	628	767	733	0.220	14.85	11.63	6.04	10.73	10.35	11.07	12.64	11.12	7.92	11.03
HLA-B	MAT2B	579	258	584	675	796	0.181	17.85	11.63	11.69	10.73	13.79	11.07	16.61	11.12	12.43	11.03
HLA-DRB6	MAT2B	164	141	326	168	196	0.000	7.83	11.63	1.71	10.73	4.30	11.07	6.79	11.12	4.83	11.03
HLA-F	MAT2B	708	194	557	447	820	0.000	13.41	11.63	8.50	10.73	10.25	11.07	12.55	11.12	9.43	11.03
HLA-G	MAT2B	299	260	330	429	47	0.000	7.58	11.63	1.15	10.73	2.89	11.07	5.81	11.12	2.91	11.03
MAP3K1	MAT2B	995	711	933	842	971	0.066	11.47	11.63	7.55	10.73	9.21	11.07	10.24	11.12	8.58	11.03
AIF1	MATK	7	193	464	466	567	0.000	12.41	10.96	6.11	11.41	7.75	6.72	10.00	8.27	6.51	4.03
CD53	MATK	6	562	665	333	548	0.000	15.30	10.96	8.05	11.41	8.96	6.72	12.14	8.27	7.24	4.03
GMFG	MATK	1	533	617	594	588	0.081	13.33	10.96	6.14	11.41	8.21	6.72	10.84	8.27	7.39	4.03
IFI30	MATK	255	54	141	238	586	0.000	15.29	10.96	5.93	11.41	11.34	6.72	13.82	8.27	7.64	4.03
LCP1	MATK	27	8	212	355	654	0.000	17.49	10.96	6.72	11.41	11.25	6.72	13.38	8.27	8.29	4.03
LPXN	MATK	748	222	916	692	618	0.133	11.68	10.96	7.10	11.41	8.89	6.72	9.82	8.27	7.67	4.03
LST1	MATK	54	134	711	749	744	0.271	12.78	10.96	4.75	11.41	7.21	6.72	8.89	8.27	5.02	4.03
LY86	MATK	141	182	337	409	503	0.000	10.62	10.96	4.56	11.41	5.22	6.72	7.42	8.27	3.28	4.03
AP5M1	MAX	947	857	670	549	607	0.000	9.81	12.65	9.09	11.05	9.79	10.85	9.05	11.62	10.10	11.09
BID	MB21D2	214	934	556	760	298	0.362	12.04	6.56	10.93	7.59	10.48	4.99	9.27	7.56	10.15	8.03
CEBPG	MB21D2	569	741	411	785	367	0.415	10.03	6.56	10.30	7.59	11.56	4.99	10.76	7.56	11.93	8.03
ERF	MB21D2	392	244	334	625	611	0.195	11.97	6.56	10.38	7.59	11.15	4.99	11.13	7.56	9.09	8.03
ITGA5	MB21D2	295	28	764	665	283	0.247	13.21	6.56	7.77	7.59	12.02	4.99	13.88	7.56	11.23	8.03
C18orf25	MBD1	952	954	999	979	982	0.026	10.81	11.63	9.42	11.77	9.68	11.71	10.22	11.77	11.08	11.65
CLCF1	MBOAT7	79	235	732	607	792	0.107	8.21	14.52	3.87	12.75	6.65	10.92	8.04	11.25	6.31	9.25
ARL6IP6	MCM2	75	285	462	828	637	0.588	9.89	9.62	8.03	7.30	8.05	7.30	8.71	7.75	8.59	9.31
COX7B	MCM2	244	763	759	848	652	0.359	9.67	9.62	11.66	7.30	11.90	7.30	10.71	7.75	13.03	9.31
EMC9	MCM2	894	775	289	372	902	0.000	8.73	9.62	8.59	7.30	9.14	7.30	7.64	7.75	9.60	9.31
EIF4EBP1	MCM4	470	82	805	858	103	0.564	10.27	9.27	5.74	9.68	10.68	8.76	9.06	8.45	10.77	9.90
GTSE1	MCM4	995	407	871	935	445	0.467	7.44	9.27	2.67	9.68	4.54	8.76	4.58	8.45	3.86	9.90
HEATR2	MCM4	757	683	957	948	924	0.240	8.69	9.27	8.82	9.68	9.43	8.76	9.13	8.45	10.37	9.90
HMGXB4	MCM4	597	838	859	862	384	0.327	9.16	9.27	8.62	9.68	9.08	8.76	9.27	8.45	9.77	9.90
KPNB1	MCM4	34	987	974	810	302	0.310	13.01	9.27	12.20	9.68	12.11	8.76	12.71	8.45	13.08	9.90
LRRC8D	MCM4	444	854	790	922	303	0.522	10.32	9.27	9.91	9.68	10.24	8.76	8.33	8.45	9.32	9.90
MBD2	MCM4	170	869	914	629	435	0.129	12.15	9.27	9.56	9.68	10.62	8.76	11.56	8.45	10.87	9.90
E2F1	MCM6	705	584	994	877	784	0.279	9.19	10.34	8.23	8.82	5.88	8.14	7.10	9.52	7.02	9.63
EIF4EBP1	MCM6	602	450	704	766	192	0.379	10.27	10.34	5.74	8.82	10.68	8.14	9.06	9.52	10.77	9.63
GTSE1	MCM6	903	488	907	816	567	0.282	7.44	10.34	2.67	8.82	4.54	8.14	4.58	9.52	3.86	9.63
HES6	MCM6	708	62	344	550	57	0.075	8.68	10.34	10.21	8.82	7.66	8.14	6.65	9.52	8.90	9.63
CHCHD3	MCM7	966	267	856	866	177	0.371	10.55	11.47	9.63	10.70	9.87	10.82	10.29	11.13	12.78	11.34
DLD	MCM7	183	92	783	873	22	0.605	10.67	11.47	11.29	10.70	11.89	10.82	10.80	11.13	12.96	11.34
GLRX5	MCM7	347	136	873	954	88	0.722	11.37	11.47	10.61	10.70	11.38	10.82	9.48	11.13	11.56	11.34
HPRT1	MCM7	547	35	797	479	517	0.000	9.75	11.47	11.07	10.70	9.30	10.82	8.69	11.13	9.56	11.34
APOE	MCOLN1	715	120	450	720	444	0.333	8.26	12.10	14.36	9.94	16.57	9.86	12.62	10.57	8.73	10.09
DAB2	MCOLN1	543	362	983	692	666	0.183	10.19	12.10	7.96	9.94	9.53	9.86	12.96	10.57	10.09	10.09
AGPAT1	MDC1	78	715	669	903	674	0.527	11.90	10.23	12.52	10.34	11.58	10.92	11.46	10.98	11.66	10.83
FLOT1	MDC1	11	747	776	663	527	0.149	14.37	10.23	13.28	10.34	12.62	10.92	13.20	10.98	12.77	10.83
AP3B1	MDH1	920	164	1000	1000	66	0.540	11.06	10.88	9.39	14.16	9.63	12.44	10.43	11.27	10.25	13.37
GTSE1	MEA1	147	223	793	560	463	0.090	7.44	10.42	2.67	10.80	4.54	9.82	4.58	9.54	3.86	9.23
F8	MECP2	233	815	556	559	902	0.031	8.79	12.28	9.46	11.98	9.34	10.59	10.11	11.82	10.75	11.74
GLOD4	MED11	545	707	989	997	467	0.624	10.02	9.90	10.73	6.95	11.14	8.79	10.22	7.85	10.15	8.89
C12orf65	MED13L	661	950	831	639	804	0.000	8.73	11.75	8.98	11.17	9.31	10.89	8.57	12.34	9.26	12.11
DBN1	MED20	310	710	746	593	686	0.046	10.69	8.90	12.63	7.63	7.90	8.83	10.99	8.01	10.81	9.68
GTF3C2	MED20	953	870	981	927	857	0.064	10.67	8.90	10.07	7.63	10.38	8.83	10.56	8.01	10.73	9.68
MCM2	MED20	231	661	698	960	157	0.741	9.62	8.90	7.30	7.63	7.30	8.83	7.75	8.01	9.31	9.68
LPCAT3	MED21	506	764	891	732	789	0.113	11.35	9.08	8.38	9.04	12.22	8.63	11.06	9.18	10.99	10.21
ABLIM3	MEF2C	267	580	118	696	50	0.352	9.59	9.94	11.06	13.20	13.51	8.38	11.40	10.55	11.98	13.17
ARHGEF40	MEF2C	337	2	621	850	128	0.639	12.31	9.94	10.53	13.20	12.32	8.38	11.68	10.55	10.77	13.17
C3	MEF2C	269	115	380	330	134	0.000	8.71	9.94	10.07	13.20	17.49	8.38	15.40	10.55	11.98	13.17
CLU	MEF2C	252	96	471	651	585	0.260	12.76	9.94	18.59	13.20	16.43	8.38	14.68	10.55	10.77	13.17
CPQ	MEF2C	477	41	834	927	863	0.505	12.17	9.94	8.78	13.20	10.38	8.38	10.49	10.55	8.81	13.17
FAM117A	MEF2C	370	407	673	438	559	0.000	11.82	9.94	7.18	13.20	9.13	8.38	8.76	10.55	7.96	13.17
GAS6	MEF2C	714	834	472	777	31	0.308	9.58	9.94	11.63	13.20	11.81	8.38	13.26	10.55	12.58	13.17
LINC00341	MEF2C	730	4	405	268	345	0.000	9.93	9.94	6.74	13.20	8.42	8.38	8.72	10.55	8.05	13.17
CACNA2D2	MEGF9	3	586	58	908	526	0.760	8.53	12.99	9.49	11.56	5.92	11.59	11.55	11.56	7.82	9.89
CSF1R	MEI1	582	79	546	571	704	0.048	12.11	10.02	9.05	4.52	8.78	5.26	11.19	6.75	8.26	4.82
DNAJB9	MEI1	604	317	172	329	151	0.000	10.08	10.02	9.70	4.52	12.42	5.26	10.56	6.75	11.03	4.82
ENTPD1	MEI1	283	393	854	641	435	0.211	12.63	10.02	10.25	4.52	9.37	5.26	11.59	6.75	9.95	4.82
GNG7	MEI1	688	497	307	664	295	0.246	10.13	10.02	13.29	4.52	8.49	5.26	8.32	6.75	8.16	4.82
IGF1	MEI1	279	156	57	479	448	0.000	5.41	10.02	5.91	4.52	11.82	5.26	9.51	6.75	9.58	4.82
ADA	MEMO1	162	260	852	679	706	0.179	10.05	8.57	6.77	6.85	7.50	7.47	8.07	6.46	8.35	9.13
CDCA4	MEMO1	702	664	832	948	703	0.446	8.56	8.57	4.77	6.85	6.78	7.47	6.79	6.46	6.31	9.13
ECE2	MEMO1	717	677	747	658	514	0.072	7.85	8.57	10.21	6.85	8.77	7.47	5.65	6.46	7.96	9.13
EIF4EBP1	MEMO1	585	161	768	780	638	0.315	10.27	8.57	5.74	6.85	10.68	7.47	9.06	6.46	10.77	9.13
FKBP4	MEMO1	92	662	788	685	801	0.104	11.27	8.57	12.23	6.85	12.11	7.47	11.06	6.46	12.21	9.13
MBLAC1	MEPCE	807	789	666	896	751	0.285	6.51	11.30	6.89	10.97	6.12	11.09	4.50	10.54	6.68	11.14
GAS5	METTL13	448	548	214	535	587	0.035	10.47	9.97	10.44	9.59	11.25	9.89	12.07	9.38	10.80	10.30
EIF4EBP1	METTL5	789	449	944	884	342	0.431	10.27	8.34	5.74	9.29	10.68	9.30	9.06	8.57	10.77	10.08
BTG2	METTL7A	700	406	109	556	6	0.084	12.52	10.96	10.85	11.88	9.57	14.09	13.09	12.50	13.09	11.44
CBX7	METTL7A	823	53	320	863	374	0.565	11.78	10.96	13.75	11.88	10.79	14.09	11.81	12.50	12.54	11.44
CREBRF	METTL7A	911	426	558	684	371	0.247	12.18	10.96	9.91	11.88	10.51	14.09	11.17	12.50	10.55	11.44
GUCY1A3	METTL7A	472	139	362	673	462	0.346	6.77	10.96	8.59	11.88	8.17	14.09	9.91	12.50	8.44	11.44
ISCU	METTL7A	809	151	519	801	438	0.442	11.86	10.96	12.81	11.88	11.41	14.09	11.91	12.50	12.87	11.44
ITM2A	METTL7A	103	442	312	458	517	0.000	10.23	10.96	10.60	11.88	6.28	14.09	10.30	12.50	9.71	11.44
ANAPC11	MEX3A	0	253	451	315	339	0.000	10.49	3.60	10.76	5.20	11.07	7.30	10.08	5.00	11.53	3.75
CCDC167	MEX3A	0	411	524	360	302	0.000	8.61	3.60	7.29	5.20	9.20	7.30	6.59	5.00	7.87	3.75
HDAC2	MEX3A	0	376	368	458	507	0.000	10.62	3.60	10.52	5.20	10.16	7.30	11.01	5.00	11.22	3.75
ITGAV	MFGE8	306	578	945	450	768	0.000	8.62	10.46	11.55	11.29	10.52	9.35	12.42	13.16	11.37	13.43
GMPS	MFI2	819	493	554	634	303	0.174	10.35	7.01	10.20	8.50	9.93	6.73	10.53	6.62	10.51	6.37
ABI3	MFSD1	14	523	977	738	554	0.319	11.43	11.99	5.16	9.20	7.26	10.71	9.24	11.50	6.96	9.62
CYP27A1	MFSD1	310	380	131	878	761	0.625	10.83	11.99	10.07	9.20	14.61	10.71	12.12	11.50	10.70	9.62
FGD2	MFSD1	864	502	954	858	759	0.228	11.82	11.99	6.05	9.20	8.24	10.71	10.56	11.50	7.26	9.62
GLUL	MFSD1	59	631	560	819	472	0.542	16.05	11.99	17.85	9.20	14.08	10.71	16.28	11.50	16.03	9.62
HVCN1	MFSD1	739	360	852	940	578	0.545	10.24	11.99	6.78	9.20	5.32	10.71	6.89	11.50	7.76	9.62
LAT	MFSD1	40	327	21	320	660	0.000	11.14	11.99	7.69	9.20	8.32	10.71	8.92	11.50	6.97	9.62
CERS2	MFSD10	729	423	323	896	973	0.479	11.73	12.07	10.11	10.98	13.35	9.62	12.00	11.66	9.89	9.82
CYB5R1	MFSD10	575	858	732	982	515	0.624	11.39	12.07	10.52	10.98	11.03	9.62	11.11	11.66	14.25	9.82
ERBB2	MFSD10	687	228	430	944	852	0.619	9.14	12.07	9.47	10.98	11.38	9.62	12.06	11.66	10.91	9.82
ATOX1	MFSD12	737	916	766	975	986	0.253	10.15	10.86	9.86	10.17	11.07	10.04	9.45	9.83	8.97	9.02
CD53	MFSD12	112	436	858	903	813	0.470	15.30	10.86	8.05	10.17	8.96	10.04	12.14	9.83	7.24	9.02
ABCA3	MFSD2A	778	142	473	1000	478	0.861	8.87	8.47	12.96	9.78	7.45	13.48	13.89	10.56	10.00	4.98
LGALS3	MFSD4	190	5	216	230	964	0.000	12.33	6.29	10.38	12.09	8.29	6.02	13.20	8.80	10.66	6.29
CD6	MGAT1	196	433	412	59	154	0.000	11.48	13.94	5.64	11.62	6.39	13.39	8.00	13.52	4.34	11.87
CNOT6	MGAT4B	813	679	726	940	953	0.301	10.21	11.53	9.61	11.44	9.40	13.85	10.21	12.16	9.49	11.03
MARCH8	MGEA5	164	822	745	864	841	0.274	12.65	13.25	10.23	13.51	10.96	12.73	10.22	13.43	10.19	12.75
CACNA2D2	MGLL	355	693	155	826	735	0.438	8.53	10.15	9.49	14.04	5.92	13.53	11.55	13.03	7.82	11.99
CAPN3	MGLL	448	102	100	762	777	0.393	10.90	10.15	10.87	14.04	11.03	13.53	10.84	13.03	14.61	11.99
COL4A3BP	MGLL	232	731	895	900	250	0.487	11.33	10.15	10.76	14.04	10.66	13.53	10.94	13.03	11.73	11.99
CREBRF	MGLL	198	561	639	498	291	0.000	12.18	10.15	9.91	14.04	10.51	13.53	11.17	13.03	10.55	11.99
FNIP2	MGLL	445	577	361	892	454	0.746	9.23	10.15	10.16	14.04	11.56	13.53	11.01	13.03	10.43	11.99
FYCO1	MGLL	526	388	942	846	674	0.419	10.01	10.15	9.16	14.04	10.50	13.53	11.37	13.03	13.90	11.99
GPD1L	MGLL	496	638	594	905	364	0.694	9.40	10.15	11.02	14.04	7.49	13.53	10.99	13.03	13.46	11.99
IGIP	MGLL	338	701	371	371	516	0.000	7.64	10.15	11.58	14.04	9.61	13.53	9.50	13.03	9.77	11.99
BCAM	MGRN1	3	55	73	859	208	0.718	8.07	12.85	10.26	12.60	11.53	12.39	13.11	12.01	10.96	12.04
CISH	MGRN1	509	125	184	836	618	0.609	10.79	12.85	4.33	12.60	11.06	12.39	10.54	12.01	10.12	12.04
ITPR3	MGRN1	78	97	308	960	753	0.793	10.94	12.85	10.05	12.60	9.19	12.39	13.54	12.01	10.22	12.04
MFSD2A	MGRN1	25	127	73	785	545	0.547	8.47	12.85	9.78	12.60	13.48	12.39	10.56	12.01	4.98	12.04
GALE	MGST1	465	65	779	994	622	0.787	9.35	10.34	9.28	10.59	11.48	14.97	9.67	11.93	7.74	8.75
ADAM19	MIAT	661	844	365	745	451	0.287	12.45	12.47	8.38	14.93	9.65	7.03	10.55	10.17	8.32	6.55
CYP27A1	MICAL1	407	140	10	868	354	0.736	10.83	13.91	10.07	11.92	14.61	9.30	12.12	12.78	10.70	9.46
CISH	MICAL2	278	99	242	805	602	0.559	10.79	11.00	4.33	12.97	11.06	8.85	10.54	10.19	10.12	10.66
IL4R	MICAL2	465	5	519	606	390	0.203	14.13	11.00	8.99	12.97	13.12	8.85	13.61	10.19	9.39	10.66
FBXO45	MICALL1	767	292	995	885	938	0.252	8.37	10.11	10.24	8.36	8.70	9.45	7.90	10.38	10.25	10.08
ABCA3	MID1IP1	406	194	313	967	501	0.933	8.87	11.49	12.96	11.43	7.45	11.13	13.89	11.28	10.00	12.31
CACNA2D2	MID1IP1	84	93	168	969	166	0.938	8.53	11.49	9.49	11.43	5.92	11.13	11.55	11.28	7.82	12.31
CISH	MID1IP1	577	421	258	922	573	0.769	10.79	11.49	4.33	11.43	11.06	11.13	10.54	11.28	10.12	12.31
GPD1L	MID1IP1	526	98	375	916	202	0.819	9.40	11.49	11.02	11.43	7.49	11.13	10.99	11.28	13.46	12.31
MFSD2A	MID1IP1	168	398	302	955	425	0.910	8.47	11.49	9.78	11.43	13.48	11.13	10.56	11.28	4.98	12.31
BCL6	MID2	17	564	823	567	514	0.061	15.42	6.38	11.51	5.69	12.59	7.55	13.82	7.69	14.96	9.36
CLN6	MIEF1	934	875	727	965	827	0.248	10.44	10.21	9.50	10.46	10.21	11.26	9.57	10.03	9.88	10.37
FBXO7	MIEF1	17	624	576	934	975	0.551	14.15	10.21	11.33	10.46	11.96	11.26	12.13	10.03	10.77	10.37
GTPBP1	MIEF1	49	923	878	201	829	0.000	13.00	10.21	10.70	10.46	10.10	11.26	11.31	10.03	11.32	10.37
MICALL1	MIEF1	986	329	976	961	782	0.320	10.11	10.21	8.36	10.46	9.45	11.26	10.38	10.03	10.08	10.37
HSF1	MINA	588	769	739	597	803	0.004	11.93	8.48	11.47	8.43	11.40	9.16	12.00	8.62	12.43	10.46
KLF2	MIR22HG	631	148	332	329	296	0.000	13.32	9.97	8.88	8.72	8.69	10.49	12.17	11.20	10.63	10.52
ADHFE1	MIR29C	0	0	0	0	0	0.000	8.66	0.00	9.62	0.00	12.15	0.00	9.00	0.00	11.31	0.00
GAS6	MIR568	0	114	180	762	253	0.000	9.58	1.01	11.63	1.40	11.81	2.42	13.26	1.64	12.58	3.62
MGLL	MIR568	0	244	350	293	369	0.000	10.15	1.01	14.04	1.40	13.53	2.42	13.03	1.64	11.99	3.62
MIA3	MIR568	0	309	437	525	377	0.000	11.08	1.01	10.87	1.40	12.05	2.42	11.08	1.64	11.23	3.62
MAP7D1	MKL1	960	976	997	987	818	0.103	13.01	12.24	13.65	11.52	10.03	9.89	12.93	11.31	13.99	10.44
CDK4	MLF2	401	628	965	955	937	0.400	9.61	12.91	8.57	13.65	9.68	13.45	10.22	12.42	9.93	12.51
DYRK4	MLF2	689	847	915	909	908	0.141	9.03	12.91	8.31	13.65	8.36	13.45	8.52	12.42	8.67	12.51
BTBD6	MLH3	876	602	824	975	567	0.515	10.70	9.18	11.87	9.54	10.88	9.95	10.73	9.60	11.93	10.13
ACTN1	MMP14	529	433	947	691	939	0.176	14.08	8.77	12.23	7.38	12.55	10.08	13.65	13.55	10.75	10.50
AP2M1	MMP14	562	70	967	874	869	0.345	13.46	8.77	14.96	7.38	12.91	10.08	13.65	13.55	12.83	10.50
CALU	MMP14	771	682	947	896	606	0.315	10.20	8.77	10.37	7.38	11.56	10.08	12.92	13.55	11.96	10.50
CAPZB	MMP14	508	432	951	883	788	0.426	14.05	8.77	12.54	7.38	12.11	10.08	13.28	13.55	13.26	10.50
CLIC4	MMP14	812	827	662	421	919	0.000	10.09	8.77	11.33	7.38	11.83	10.08	14.16	13.55	11.51	10.50
GANAB	MMP14	582	456	824	808	961	0.267	12.72	8.77	12.37	7.38	13.90	10.08	13.74	13.55	12.24	10.50
GYS1	MMP14	543	594	654	645	20	0.149	11.42	8.77	10.61	7.38	10.10	10.08	10.58	13.55	14.00	10.50
ITGAV	MMP14	642	656	990	678	617	0.059	8.62	8.77	11.55	7.38	10.52	10.08	12.42	13.55	11.37	10.50
LGALS1	MMP14	606	436	858	852	376	0.475	12.94	8.77	11.92	7.38	11.12	10.08	13.42	13.55	12.98	10.50
BTBD9	MMP15	184	631	858	926	641	0.537	10.00	6.14	11.61	8.85	8.51	12.33	9.93	9.66	9.62	8.71
ARID5A	MMP19	470	645	286	309	649	0.000	13.47	8.23	9.57	2.60	10.93	7.64	11.97	11.68	10.62	7.18
ATF3	MMP19	327	748	512	145	575	0.000	9.06	8.23	8.27	2.60	11.43	7.64	11.92	11.68	9.83	7.18
DUSP1	MMP19	584	405	405	215	776	0.000	15.56	8.23	11.84	2.60	14.50	7.64	15.87	11.68	13.08	7.18
FOXO1	MMP19	316	508	766	500	570	0.000	10.46	8.23	8.99	2.60	10.80	7.64	11.48	11.68	13.10	7.18
IFFO1	MMP19	302	91	145	78	769	0.000	11.53	8.23	11.27	2.60	10.44	7.64	10.92	11.68	10.23	7.18
KLF9	MMP19	576	106	803	506	559	0.003	10.61	8.23	11.57	2.60	12.11	7.64	13.49	11.68	13.62	7.18
ANXA4	MMP28	501	701	686	977	768	0.626	10.66	6.39	8.89	9.10	12.12	4.02	11.82	9.83	9.84	7.40
BRI3	MMP28	293	555	280	944	321	0.861	12.91	6.39	10.15	9.10	11.99	4.02	12.37	9.83	12.16	7.40
CAPN2	MMP28	494	675	403	929	544	0.749	12.44	6.39	12.38	9.10	11.25	4.02	14.65	9.83	12.91	7.40
CD47	MMP28	581	26	442	930	417	0.820	11.79	6.39	12.20	9.10	10.56	4.02	12.96	9.83	10.21	7.40
FBXO38	MMP28	426	120	306	924	667	0.764	11.36	6.39	9.64	9.10	10.37	4.02	10.48	9.83	10.98	7.40
GPD1L	MMP28	626	41	703	980	195	0.795	9.40	6.39	11.02	9.10	7.49	4.02	10.99	9.83	13.46	7.40
HPCAL1	MMP28	404	95	379	946	463	0.892	12.64	6.39	12.89	9.10	11.39	4.02	12.55	9.83	9.88	7.40
ALDH6A1	MOAP1	802	19	583	917	564	0.610	8.42	10.26	12.86	13.04	13.70	9.88	9.40	10.41	10.84	11.25
BTBD7	MOAP1	989	373	867	926	886	0.263	9.73	10.26	9.15	13.04	9.96	9.88	10.24	10.41	10.49	11.25
CABLES1	MOAP1	427	13	513	922	631	0.772	6.43	10.26	11.89	13.04	9.34	9.88	9.38	10.41	7.16	11.25
DAPK2	MOAP1	631	192	592	907	556	0.674	11.84	10.26	8.02	13.04	7.44	9.88	11.25	10.41	11.68	11.25
FYCO1	MOAP1	986	12	975	819	587	0.276	10.01	10.26	9.16	13.04	10.50	9.88	11.37	10.41	13.90	11.25
DGKA	MOB1A	419	708	768	419	917	0.000	12.48	12.95	10.12	9.89	8.12	10.98	10.68	12.15	7.65	10.67
ECE2	MOB1A	786	494	934	724	822	0.112	7.85	12.95	10.21	9.89	8.77	10.98	5.65	12.15	7.96	10.67
EIF4EBP1	MOB1A	501	720	820	743	738	0.135	10.27	12.95	5.74	9.89	10.68	10.98	9.06	12.15	10.77	10.67
EPT1	MOB1A	486	631	917	896	970	0.331	8.79	12.95	10.37	9.89	11.34	10.98	9.83	12.15	10.43	10.67
DNAJB9	MOB3A	83	542	612	690	695	0.208	10.08	14.11	9.70	9.77	12.42	9.47	10.56	11.23	11.03	10.08
MGAT2	MOB3A	671	459	364	919	415	0.752	5.97	14.11	2.26	9.77	5.68	9.47	3.58	11.23	3.95	10.08
ARPC2	MOB3B	757	526	696	562	315	0.049	14.63	8.14	12.36	9.08	11.91	7.24	13.74	9.39	13.04	9.62
C19orf59	MOB3B	349	170	161	264	412	0.000	13.16	8.14	2.26	9.08	4.81	7.24	10.23	9.39	3.80	9.62
MEX3A	MORC2	101	699	630	467	378	0.000	3.60	10.15	5.20	9.73	7.30	10.55	5.00	10.09	3.75	11.03
ARMC10	MOSPD3	626	739	420	913	791	0.498	9.66	10.29	10.38	8.67	10.14	9.79	9.77	8.19	9.69	8.30
C17orf96	MPHOSPH10	397	587	707	332	615	0.000	6.39	9.14	10.04	9.53	7.97	10.22	5.80	9.59	5.66	10.88
MCM4	MPHOSPH10	425	965	925	883	433	0.383	9.27	9.14	9.68	9.53	8.76	10.22	8.45	9.59	9.90	10.88
EIF4EBP1	MPHOSPH6	744	355	842	865	85	0.437	10.27	8.64	5.74	8.87	10.68	8.37	9.06	8.56	10.77	8.22
C7orf50	MPLKIP	433	669	492	963	461	0.842	9.97	9.75	11.56	8.57	10.34	10.47	10.22	8.54	10.52	9.04
CSTF2	MPLKIP	920	936	178	960	959	0.263	8.62	9.75	7.77	8.57	7.60	10.47	7.60	8.54	7.99	9.04
MCM4	MPLKIP	220	884	122	838	695	0.409	9.27	9.75	9.68	8.57	8.76	10.47	8.45	8.54	9.90	9.04
ABI3	MPP1	14	176	907	660	695	0.160	11.43	13.73	5.16	11.14	7.26	10.39	9.24	11.11	6.96	9.97
APOE	MPP1	39	28	431	502	554	0.003	8.26	13.73	14.36	11.14	16.57	10.39	12.62	11.11	8.73	9.97
ARHGAP17	MPP1	138	388	863	662	675	0.162	10.30	13.73	8.56	11.14	9.51	10.39	10.59	11.11	10.67	9.97
CD4	MPP1	20	121	90	619	458	0.238	12.14	13.73	8.27	11.14	11.68	10.39	12.30	11.11	7.15	9.97
CORO7	MPP1	337	888	951	782	545	0.260	13.07	13.73	10.67	11.14	9.38	10.39	11.44	11.11	9.17	9.97
CYP27A1	MPP1	303	48	122	749	662	0.417	10.83	13.73	10.07	11.14	14.61	10.39	12.12	11.11	10.70	9.97
CYTH4	MPP1	711	295	831	875	499	0.479	14.41	13.73	6.46	11.14	8.43	10.39	10.87	11.11	7.26	9.97
FAM78A	MPP1	273	909	834	602	832	0.051	11.43	13.73	9.03	11.14	7.00	10.39	9.04	11.11	10.25	9.97
GLIPR2	MPP1	754	236	876	886	804	0.305	13.44	13.73	8.00	11.14	7.51	10.39	11.39	11.11	8.06	9.97
GPSM3	MPP1	820	55	889	968	548	0.557	15.11	13.73	6.50	11.14	8.65	10.39	11.16	11.11	7.28	9.97
HLA-DRB6	MPP1	60	93	443	241	216	0.000	7.83	13.73	1.71	11.14	4.30	10.39	6.79	11.11	4.83	9.97
MICAL1	MPP1	762	947	909	719	509	0.105	13.91	13.73	11.92	11.14	9.30	10.39	12.78	11.11	9.46	9.97
LGALS3	MPP5	271	284	272	912	476	0.824	12.33	8.56	10.38	10.38	8.29	10.23	13.20	10.14	10.66	10.73
ARHGEF17	MPRIP	544	984	822	919	661	0.365	8.33	11.45	12.91	14.11	9.98	12.93	13.02	14.12	11.02	13.58
HEYL	MPRIP	288	117	787	594	562	0.110	4.86	11.45	7.41	14.11	8.23	12.93	11.16	14.12	9.05	13.58
LATS2	MPRIP	663	291	776	931	854	0.466	10.21	11.45	6.80	14.11	9.54	12.93	10.90	14.12	11.13	13.58
MAP2K4	MPRIP	451	945	851	916	932	0.240	10.83	11.45	11.87	14.11	10.30	12.93	9.86	14.12	11.01	13.58
DRG1	MPST	912	91	500	911	921	0.411	10.34	10.78	10.40	8.82	10.26	13.60	9.77	10.43	11.95	11.18
LRRC28	MPV17	978	970	23	970	753	0.344	9.68	10.34	9.26	10.59	10.20	9.75	8.11	10.18	9.83	9.23
ADAM15	MPZL1	531	661	976	884	958	0.288	11.60	11.41	11.17	10.19	10.79	10.54	12.74	11.97	11.12	10.09
B4GALT3	MPZL1	35	713	959	858	653	0.354	11.38	11.41	10.10	10.19	10.27	10.54	10.70	11.97	10.29	10.09
COPA	MPZL1	729	700	995	989	747	0.396	12.84	11.41	12.74	10.19	12.52	10.54	13.07	11.97	12.67	10.09
FH	MPZL1	243	714	775	962	537	0.661	10.19	11.41	10.92	10.19	12.98	10.54	10.25	11.97	12.65	10.09
IARS2	MPZL1	661	727	844	943	553	0.493	10.63	11.41	11.39	10.19	12.10	10.54	11.30	11.97	12.45	10.09
LMAN1	MPZL1	21	931	764	996	696	0.546	10.09	11.41	9.98	10.19	13.69	10.54	12.28	11.97	11.76	10.09
IRF8	MRAS	734	360	338	575	420	0.113	11.63	8.10	5.25	13.25	9.65	8.23	10.22	10.50	5.73	12.10
GTSE1	MRGBP	616	436	463	425	494	0.000	7.44	9.90	2.67	8.90	4.54	9.50	4.58	8.64	3.86	9.33
KIFC1	MRGBP	568	251	484	509	408	0.013	8.16	9.90	2.52	8.90	4.78	9.50	5.93	8.64	4.27	9.33
LSM12	MRM1	671	786	733	820	902	0.135	8.90	7.96	6.22	6.72	7.69	8.12	6.66	6.33	8.42	8.49
ARL6IP6	MRPL11	444	475	846	956	825	0.577	9.89	9.70	8.03	8.71	8.05	10.21	8.71	8.98	8.59	10.39
C19orf48	MRPL11	948	814	885	994	503	0.413	9.78	9.70	7.96	8.71	10.20	10.21	8.88	8.98	8.59	10.39
CCNF	MRPL11	699	948	893	836	473	0.236	8.36	9.70	7.84	8.71	6.71	10.21	6.33	8.98	7.60	10.39
E2F1	MRPL11	523	804	694	802	564	0.312	9.19	9.70	8.23	8.71	5.88	10.21	7.10	8.98	7.02	10.39
GTSE1	MRPL11	494	381	696	614	304	0.171	7.44	9.70	2.67	8.71	4.54	10.21	4.58	8.98	3.86	10.39
CD3EAP	MRPL12	793	890	687	976	741	0.397	5.67	10.03	5.88	10.23	6.12	12.00	4.80	9.46	7.46	11.59
CDCA4	MRPL12	829	525	761	971	658	0.555	8.56	10.03	4.77	10.23	6.78	12.00	6.79	9.46	6.31	11.59
E2F2	MRPL12	496	49	469	633	107	0.266	10.89	10.03	1.27	10.23	4.49	12.00	5.81	9.46	3.07	11.59
MCM6	MRPL12	672	566	712	793	505	0.358	10.34	10.03	8.82	10.23	8.14	12.00	9.52	9.46	9.63	11.59
CCNF	MRPL15	236	893	778	827	300	0.351	8.36	9.28	7.84	9.81	6.71	10.40	6.33	8.80	7.60	11.76
CDCA4	MRPL15	640	540	880	979	530	0.663	8.56	9.28	4.77	9.81	6.78	10.40	6.79	8.80	6.31	11.76
CSTF2	MRPL19	979	793	962	997	850	0.202	8.62	8.82	7.77	9.24	7.60	10.79	7.60	8.65	7.99	10.60
DFFA	MRPL20	991	823	962	993	977	0.110	9.66	10.52	10.14	10.56	10.10	10.94	9.70	10.30	10.27	11.61
DNAJC11	MRPL20	889	851	982	995	954	0.152	9.45	10.52	10.01	10.56	10.20	10.94	9.46	10.30	10.81	11.61
CDCA4	MRPL21	868	500	856	963	769	0.429	8.56	9.56	4.77	9.68	6.78	9.93	6.79	8.72	6.31	10.50
E2F1	MRPL21	468	673	664	661	624	0.099	9.19	9.56	8.23	9.68	5.88	9.93	7.10	8.72	7.02	10.50
E2F2	MRPL21	435	47	655	451	192	0.000	10.89	9.56	1.27	9.68	4.49	9.93	5.81	8.72	3.07	10.50
ARHGEF11	MRPL24	322	784	884	920	947	0.296	11.85	9.48	12.40	9.91	11.19	11.16	11.69	9.40	11.19	11.27
CDCA4	MRPL27	741	661	925	985	710	0.452	8.56	9.23	4.77	10.17	6.78	10.64	6.79	9.07	6.31	10.82
DHCR7	MRPL3	70	580	709	945	496	0.746	10.54	9.68	10.79	10.10	13.03	10.89	10.19	10.16	9.04	11.46
AP3B1	MRPL35	959	503	980	993	761	0.385	11.06	9.12	9.39	10.80	9.63	10.71	10.43	9.07	10.25	11.20
BRD9	MRPL36	678	879	823	922	978	0.193	10.59	8.50	10.62	8.17	10.14	9.36	10.52	7.69	10.65	10.29
C19orf48	MRPL36	470	741	478	988	669	0.771	9.78	8.50	7.96	8.17	10.20	9.36	8.88	7.69	8.59	10.29
GTSE1	MRPL36	125	247	619	572	255	0.108	7.44	8.50	2.67	8.17	4.54	9.36	4.58	7.69	3.86	10.29
E2F2	MRPL37	667	57	662	553	168	0.053	10.89	10.67	1.27	10.64	4.49	11.91	5.81	10.10	3.07	12.11
HSF1	MRPL42	637	774	810	609	958	0.000	11.93	9.04	11.47	7.99	11.40	9.79	12.00	9.21	12.43	9.67
CHAF1A	MRPL47	598	770	924	936	519	0.467	9.43	8.78	8.20	8.97	7.93	9.34	7.87	8.47	9.76	10.13
E2F2	MRPL47	454	161	798	537	173	0.056	10.89	8.78	1.27	8.97	4.49	9.34	5.81	8.47	3.07	10.13
ECE2	MRPL47	804	510	997	983	640	0.497	7.85	8.78	10.21	8.97	8.77	9.34	5.65	8.47	7.96	10.13
IPPK	MRPL47	669	836	971	928	963	0.175	7.59	8.78	6.48	8.97	6.68	9.34	6.27	8.47	7.94	10.13
ITCH	MRPL47	760	955	739	608	801	0.000	11.74	8.78	10.54	8.97	11.89	9.34	11.20	8.47	11.28	10.13
KIFC1	MRPL47	283	223	769	588	347	0.132	8.16	8.78	2.52	8.97	4.78	9.34	5.93	8.47	4.27	10.13
C19orf48	MRPL48	910	760	706	893	246	0.356	9.78	9.02	7.96	9.22	10.20	9.39	8.88	8.22	8.59	9.43
MACROD1	MRPL49	485	678	59	945	661	0.721	7.28	10.52	8.34	10.36	10.09	11.30	7.88	10.32	12.58	10.72
APH1A	MRPL9	821	727	783	989	988	0.319	12.42	9.52	11.17	9.04	12.75	8.99	12.45	8.82	11.31	10.14
KIFC1	MRPL9	701	187	810	440	491	0.000	8.16	9.52	2.52	9.04	4.78	8.99	5.93	8.82	4.27	10.14
ARL6IP6	MRPS11	802	242	686	926	722	0.497	9.89	9.76	8.03	9.81	8.05	10.41	8.71	8.56	8.59	10.38
CDCA4	MRPS11	673	624	919	991	765	0.491	8.56	9.76	4.77	9.81	6.78	10.41	6.79	8.56	6.31	10.38
CDCA4	MRPS12	859	564	890	984	727	0.448	8.56	9.72	4.77	8.92	6.78	10.44	6.79	8.58	6.31	10.06
EPT1	MRPS12	583	931	870	602	534	0.043	8.79	9.72	10.37	8.92	11.34	10.44	9.83	8.58	10.43	10.06
CCNF	MRPS15	636	920	835	884	676	0.253	8.36	10.43	7.84	10.15	6.71	11.54	6.33	10.28	7.60	12.08
E2F1	MRPS15	540	869	684	853	649	0.343	9.19	10.43	8.23	10.15	5.88	11.54	7.10	10.28	7.02	12.08
HPS1	MRPS16	656	967	981	1000	851	0.273	12.88	10.19	11.18	9.85	11.45	10.96	11.64	9.83	10.18	11.75
LRWD1	MRPS17	540	885	974	955	920	0.260	11.18	8.24	9.46	9.11	9.41	9.54	8.82	7.71	9.40	10.32
GTF3C2	MRPS33	728	898	842	958	297	0.432	10.67	8.17	10.07	9.24	10.38	9.84	10.56	7.94	10.73	10.78
MRM1	MRPS33	804	893	865	969	638	0.338	7.96	8.17	6.72	9.24	8.12	9.84	6.33	7.94	8.49	10.78
AP3B1	MRPS36	914	473	959	988	923	0.328	11.06	9.35	9.39	9.18	9.63	9.84	10.43	8.68	10.25	10.41
CRB3	MRPS36	414	316	947	951	47	0.678	4.93	9.35	2.37	9.18	9.07	9.84	7.94	8.68	1.89	10.41
ERBB2IP	MRPS36	659	276	911	945	495	0.605	11.41	9.35	11.94	9.18	11.58	9.84	11.41	8.68	11.30	10.41
FCHO2	MRPS36	646	821	875	972	656	0.445	10.27	9.35	9.13	9.18	9.90	9.84	11.20	8.68	10.36	10.41
CDCA4	MRPS7	912	604	940	994	650	0.435	8.56	10.02	4.77	10.70	6.78	11.12	6.79	10.05	6.31	12.01
FAM104A	MRPS7	616	960	983	974	610	0.368	10.31	10.02	8.03	10.70	8.31	11.12	8.12	10.05	9.09	12.01
CDK16	MRTO4	623	968	968	812	844	0.095	11.63	9.33	13.02	10.26	11.03	10.12	11.75	9.14	12.96	10.22
CTPS1	MRTO4	871	976	644	1000	1000	0.255	9.54	9.33	9.54	10.26	11.61	10.12	9.69	9.14	10.26	10.22
E2F2	MRTO4	455	39	493	583	313	0.166	10.89	9.33	1.27	10.26	4.49	10.12	5.81	9.14	3.07	10.22
E2F3	MRTO4	369	975	856	863	830	0.202	10.53	9.33	8.80	10.26	8.37	10.12	8.99	9.14	10.01	10.22
E2F6	MRTO4	942	832	973	935	777	0.131	7.84	9.33	8.15	10.26	8.74	10.12	8.14	9.14	10.53	10.22
MIIP	MRTO4	724	412	851	866	765	0.312	12.08	9.33	9.53	10.26	10.00	10.12	10.23	9.14	10.19	10.22
C16orf45	MRVI1	218	7	156	756	122	0.512	8.03	11.57	13.31	11.97	9.72	7.82	9.12	10.95	11.79	9.86
IGF1	MRVI1	16	3	60	551	686	0.076	5.41	11.57	5.91	11.97	11.82	7.82	9.51	10.95	9.58	9.86
KLHL3	MRVI1	22	1	522	400	929	0.000	7.68	11.57	10.45	11.97	8.42	7.82	8.60	10.95	8.48	9.86
CDCA4	MSANTD3	927	498	898	850	658	0.271	8.56	7.81	4.77	8.29	6.78	8.42	6.79	8.56	6.31	9.44
ITGA5	MSANTD3	403	127	963	735	604	0.300	13.21	7.81	7.77	8.29	12.02	8.42	13.88	8.56	11.23	9.44
MAP4K4	MSANTD3	373	281	977	949	903	0.472	13.19	7.81	12.90	8.29	11.35	8.42	11.97	8.56	11.83	9.44
CNOT6	MSH3	981	799	753	989	942	0.240	10.21	9.16	9.61	7.95	9.40	8.89	10.21	7.92	9.49	9.12
CDCA4	MSH6	861	813	902	926	838	0.145	8.56	10.03	4.77	9.65	6.78	10.51	6.79	10.34	6.31	10.11
CHAF1A	MSH6	709	723	898	770	878	0.054	9.43	10.03	8.20	9.65	7.93	10.51	7.87	10.34	9.76	10.11
E2F2	MSH6	321	250	769	552	309	0.078	10.89	10.03	1.27	9.65	4.49	10.51	5.81	10.34	3.07	10.11
BDH1	MSI2	886	322	55	359	60	0.000	9.07	10.36	11.12	11.95	13.56	10.01	7.26	10.16	9.22	12.41
CBX1	MSI2	623	539	945	639	945	0.058	10.67	10.36	11.86	11.95	9.59	10.01	10.41	10.16	11.20	12.41
GCLC	MSI2	825	614	446	916	907	0.409	9.70	10.36	10.15	11.95	12.24	10.01	9.64	10.16	9.80	12.41
MCM2	MSI2	869	275	413	160	559	0.000	9.62	10.36	7.30	11.95	7.30	10.01	7.75	10.16	9.31	12.41
MMP28	MSN	366	755	138	258	345	0.000	6.39	15.53	9.10	11.71	4.02	12.67	9.83	15.62	7.40	12.24
EXT2	MSRB3	256	535	427	893	383	0.768	10.40	8.88	10.12	9.54	10.78	8.06	11.45	11.84	10.30	12.10
FOXP1	MSRB3	432	431	519	937	57	0.865	11.49	8.88	10.43	9.54	10.41	8.06	11.61	11.84	9.99	12.10
GAS6	MSRB3	474	280	491	852	158	0.704	9.58	8.88	11.63	9.54	11.81	8.06	13.26	11.84	12.58	12.10
ITGA5	MSRB3	395	501	539	705	115	0.390	13.21	8.88	7.77	9.54	12.02	8.06	13.88	11.84	11.23	12.10
FSTL3	MT1E	431	616	342	692	467	0.326	9.10	7.38	9.56	11.08	9.80	13.79	13.14	10.77	9.14	10.73
ERCC3	MTA3	965	886	985	994	1000	0.073	10.68	8.78	11.28	12.00	10.61	9.15	10.83	9.66	11.13	9.65
HEBP2	MTA3	137	11	910	966	958	0.498	11.77	8.78	8.87	12.00	11.97	9.15	10.73	9.66	12.07	9.65
BOP1	MTERFD1	740	657	512	854	876	0.327	8.23	8.11	6.79	8.13	6.88	9.31	6.09	8.02	9.38	9.92
CDCA4	MTERFD1	905	856	890	962	740	0.229	8.56	8.11	4.77	8.13	6.78	9.31	6.79	8.02	6.31	9.92
EMC1	MTF1	331	852	983	987	962	0.326	9.86	11.58	10.58	8.97	10.67	8.89	10.60	9.42	11.27	10.04
CABLES1	MTFR1L	412	262	945	917	461	0.625	6.43	10.55	11.89	11.68	9.34	11.89	9.38	10.51	7.16	12.28
CDCA4	MTHFD1	936	572	363	957	696	0.562	8.56	9.68	4.77	10.17	6.78	13.25	6.79	9.91	6.31	11.85
GMFB	MTHFD1	83	817	296	969	818	0.621	10.33	9.68	12.09	10.17	10.44	13.25	10.79	9.91	9.35	11.85
KIFC1	MTHFD1	917	140	619	622	323	0.123	8.16	9.68	2.52	10.17	4.78	13.25	5.93	9.91	4.27	11.85
DCAF8	MTHFR	934	982	302	906	542	0.385	12.22	10.88	12.57	10.31	13.30	10.41	12.55	11.22	13.65	10.74
BRK1	MTMR14	941	913	995	964	904	0.067	12.29	12.17	12.18	9.60	11.66	10.30	12.26	10.52	12.04	11.42
IRF8	MTMR14	714	269	665	841	226	0.492	11.63	12.17	5.25	9.60	9.65	10.30	10.22	10.52	5.73	11.42
LPXN	MTMR14	755	809	776	926	518	0.423	11.68	12.17	7.10	9.60	8.89	10.30	9.82	10.52	7.67	11.42
AGBL5	MTMR4	643	887	811	905	904	0.188	9.48	11.47	9.46	11.52	8.76	12.62	9.00	10.78	9.01	10.06
DUSP12	MTX1	625	911	941	963	985	0.206	8.90	10.73	8.23	7.64	8.26	8.98	8.44	8.22	8.21	8.19
C1orf35	MTX2	814	637	773	782	766	0.085	9.49	7.97	9.50	9.98	9.21	9.75	8.68	8.60	8.93	10.74
ABCA3	MUC1	357	89	579	1000	585	0.918	8.87	7.78	12.96	5.89	7.45	6.42	13.89	13.63	10.00	6.42
ACADVL	MUC1	622	740	597	453	69	0.000	13.09	7.78	13.51	5.89	15.55	6.42	14.35	13.63	15.05	6.42
ACP6	MUC1	128	730	83	392	454	0.000	10.23	7.78	8.25	5.89	9.65	6.42	8.81	13.63	8.90	6.42
ACSL5	MUC1	458	826	168	858	813	0.397	10.94	7.78	8.33	5.89	12.76	6.42	11.40	13.63	8.25	6.42
AGPAT3	MUC1	539	257	159	876	81	0.733	11.40	7.78	12.76	5.89	12.71	6.42	11.53	13.63	12.78	6.42
AHCYL2	MUC1	453	693	188	991	108	0.885	9.44	7.78	12.04	5.89	9.53	6.42	11.27	13.63	11.67	6.42
AKAP13	MUC1	533	394	506	820	563	0.589	12.96	7.78	10.43	5.89	12.05	6.42	14.07	13.63	13.05	6.42
ALAS1	MUC1	460	150	179	775	32	0.550	11.62	7.78	10.59	5.89	13.01	6.42	11.01	13.63	11.83	6.42
ALDH2	MUC1	519	657	38	589	171	0.124	12.31	7.78	14.12	5.89	15.62	6.42	13.79	13.63	13.17	6.42
ANKFY1	MUC1	516	577	279	721	369	0.396	10.81	7.78	11.16	5.89	10.91	6.42	11.50	13.63	11.08	6.42
ANXA11	MUC1	643	213	548	759	792	0.293	14.17	7.78	12.34	5.89	11.72	6.42	13.42	13.63	13.41	6.42
AP2A2	MUC1	661	59	399	668	636	0.188	11.52	7.78	12.91	5.89	12.19	6.42	12.23	13.63	11.17	6.42
APEH	MUC1	652	42	137	938	189	0.800	11.53	7.78	11.27	5.89	11.97	6.42	10.92	13.63	12.44	6.42
APLP2	MUC1	697	271	147	732	797	0.249	14.29	7.78	14.14	5.89	14.20	6.42	15.53	13.63	12.35	6.42
ARHGEF2	MUC1	615	12	721	214	747	0.000	13.10	7.78	12.37	5.89	9.42	6.42	13.07	13.63	10.25	6.42
C11orf54	MUC1	461	549	31	821	290	0.618	9.55	7.78	8.73	5.89	12.38	6.42	9.43	13.63	10.70	6.42
CD46	MUC1	336	444	244	603	391	0.206	12.63	7.78	11.58	5.89	13.17	6.42	14.08	13.63	12.01	6.42
CD63	MUC1	706	744	475	822	628	0.355	14.13	7.78	12.63	5.89	13.12	6.42	14.90	13.63	13.84	6.42
CERS2	MUC1	521	599	150	779	785	0.358	11.73	7.78	10.11	5.89	13.35	6.42	12.00	13.63	9.89	6.42
CPM	MUC1	418	526	344	942	587	0.828	9.80	7.78	8.32	5.89	10.68	6.42	11.99	13.63	9.33	6.42
CPT2	MUC1	674	757	100	965	63	0.715	8.98	7.78	7.80	5.89	11.51	6.42	8.10	13.63	9.99	6.42
CRYZ	MUC1	223	333	138	655	70	0.310	8.32	7.78	8.35	5.89	12.87	6.42	9.49	13.63	9.27	6.42
CTSH	MUC1	707	527	63	1000	292	0.883	12.52	7.78	10.70	5.89	11.84	6.42	13.68	13.63	9.48	6.42
CXCL16	MUC1	339	853	497	798	877	0.298	12.71	7.78	8.06	5.89	10.43	6.42	12.24	13.63	6.89	6.42
CYB561D2	MUC1	622	178	467	936	334	0.811	10.48	7.78	7.21	5.89	9.72	6.42	8.52	13.63	8.23	6.42
DAGLB	MUC1	724	263	551	813	386	0.488	10.97	7.78	10.20	5.89	9.80	6.42	9.96	13.63	9.92	6.42
DAPK1	MUC1	332	301	85	820	765	0.507	10.51	7.78	11.51	5.89	11.79	6.42	12.09	13.63	8.20	6.42
DCAF8	MUC1	567	183	153	509	424	0.013	12.22	7.78	12.57	5.89	13.30	6.42	12.55	13.63	13.65	6.42
EDEM1	MUC1	422	382	361	922	638	0.775	11.59	7.78	9.57	5.89	13.17	6.42	12.18	13.63	9.81	6.42
ENPP4	MUC1	191	215	193	552	156	0.104	8.85	7.78	9.95	5.89	9.22	6.42	10.44	13.63	11.03	6.42
FBXO38	MUC1	535	306	147	910	406	0.802	11.36	7.78	9.64	5.89	10.37	6.42	10.48	13.63	10.98	6.42
FCHO2	MUC1	220	503	360	848	641	0.624	10.27	7.78	9.13	5.89	9.90	6.42	11.20	13.63	10.36	6.42
FLII	MUC1	679	448	605	705	177	0.268	13.51	7.78	11.75	5.89	12.14	6.42	13.30	13.63	14.49	6.42
FUCA1	MUC1	582	233	136	868	582	0.654	10.15	7.78	7.78	5.89	10.81	6.42	9.98	13.63	9.16	6.42
GPD1L	MUC1	315	81	595	753	14	0.459	9.40	7.78	11.02	5.89	7.49	6.42	10.99	13.63	13.46	6.42
GPR108	MUC1	697	625	374	508	629	0.004	12.41	7.78	10.43	5.89	11.07	6.42	11.10	13.63	9.91	6.42
GRN	MUC1	733	637	367	912	655	0.561	14.41	7.78	10.49	5.89	12.21	6.42	14.41	13.63	11.40	6.42
HMGCL	MUC1	758	739	54	875	130	0.501	10.43	7.78	9.21	5.89	13.52	6.42	9.80	13.63	10.64	6.42
HSD17B4	MUC1	627	590	185	986	97	0.864	11.17	7.78	12.07	5.89	13.93	6.42	12.62	13.63	11.79	6.42
HSDL2	MUC1	482	720	106	807	61	0.504	11.41	7.78	10.71	5.89	12.79	6.42	10.38	13.63	12.91	6.42
ITSN2	MUC1	353	378	452	539	628	0.059	11.95	7.78	10.29	5.89	11.25	6.42	12.16	13.63	11.34	6.42
KIAA0513	MUC1	539	5	606	813	173	0.553	12.27	7.78	14.34	5.89	8.35	6.42	10.24	13.63	10.70	6.42
LGALS3	MUC1	326	955	621	771	853	0.210	12.33	7.78	10.38	5.89	8.29	6.42	13.20	13.63	10.66	6.42
LMAN2	MUC1	760	518	349	821	616	0.445	12.80	7.78	10.35	5.89	13.15	6.42	12.08	13.63	10.78	6.42
LOC100129034	MUC1	101	108	96	50	47	0.000	0.00	7.78	0.00	5.89	0.00	6.42	0.00	13.63	0.00	6.42
LPCAT1	MUC1	235	465	658	1000	800	0.771	13.23	7.78	11.33	5.89	9.78	6.42	13.90	13.63	8.88	6.42
LRBA	MUC1	200	364	187	814	330	0.628	9.79	7.78	9.10	5.89	10.60	6.42	10.53	13.63	10.10	6.42
LRRK2	MUC1	364	206	103	996	468	0.992	12.74	7.78	9.75	5.89	8.75	6.42	12.48	13.63	9.89	6.42
LTA4H	MUC1	605	415	337	905	369	0.757	13.42	7.78	10.15	5.89	10.45	6.42	12.74	13.63	11.06	6.42
MGST1	MUC1	602	913	134	1000	824	0.581	10.34	7.78	10.59	5.89	14.97	6.42	11.93	13.63	8.75	6.42
COA7	MUTYH	101	108	96	50	47	0.000	0.00	9.19	0.00	7.99	0.00	8.75	0.00	8.24	0.00	8.57
MTERFD3	MVB12B	791	601	821	852	692	0.252	8.11	9.57	9.59	11.50	9.97	9.08	9.22	10.01	9.95	10.66
ABCA3	MVP	252	99	978	912	752	0.492	8.87	14.01	12.96	10.24	7.45	12.22	13.89	13.72	10.00	11.52
AHCYL2	MVP	651	320	760	885	110	0.565	9.44	14.01	12.04	10.24	9.53	12.22	11.27	13.72	11.67	11.52
CISH	MVP	700	791	734	954	673	0.459	10.79	14.01	4.33	10.24	11.06	12.22	10.54	13.72	10.12	11.52
DHRS7	MVP	990	503	919	965	691	0.391	12.80	14.01	10.47	10.24	11.50	12.22	10.87	13.72	13.62	11.52
EEF2K	MVP	75	260	767	596	52	0.144	8.92	14.01	9.18	10.24	10.05	12.22	10.41	13.72	11.67	11.52
EMC3	MVP	505	176	966	974	380	0.713	12.01	14.01	10.63	10.24	10.85	12.22	10.46	13.72	12.37	11.52
GALE	MVP	621	129	379	989	708	0.814	9.35	14.01	9.28	10.24	11.48	12.22	9.67	13.72	7.74	11.52
GGA2	MVP	131	226	756	833	732	0.422	11.74	14.01	11.53	10.24	11.53	12.22	12.79	13.72	11.87	11.52
HSD17B4	MVP	743	747	889	960	280	0.480	11.17	14.01	12.07	10.24	13.93	12.22	12.62	13.72	11.79	11.52
IGIP	MVP	453	88	90	272	384	0.000	7.64	14.01	11.58	10.24	9.61	12.22	9.50	13.72	9.77	11.52
LTA4H	MVP	947	364	911	916	584	0.377	13.42	14.01	10.15	10.24	10.45	12.22	12.74	13.72	11.06	11.52
EIF4A2	MXI1	322	478	896	930	968	0.447	12.09	12.17	14.85	11.92	13.40	10.98	14.05	10.60	14.63	11.32
ANO6	MXRA7	389	339	319	923	313	0.846	10.49	10.25	8.75	12.16	11.73	9.66	12.55	12.53	12.71	11.10
COL5A3	MXRA7	294	312	326	561	606	0.091	7.76	10.25	12.54	12.16	10.47	9.66	11.11	12.53	10.78	11.10
ADARB1	MYADM	358	872	838	674	535	0.157	9.95	13.40	11.09	9.66	9.64	9.98	12.56	12.69	10.70	9.85
ARID5A	MYADM	800	395	235	545	448	0.068	13.47	13.40	9.57	9.66	10.93	9.98	11.97	12.69	10.62	9.85
CD4	MYADM	319	99	116	619	635	0.178	12.14	13.40	8.27	9.66	11.68	9.98	12.30	12.69	7.15	9.85
CSF1	MYADM	422	53	740	535	531	0.037	9.75	13.40	9.52	9.66	10.57	9.98	12.27	12.69	10.02	9.85
GADD45B	MYADM	469	277	628	517	406	0.025	13.01	13.40	10.24	9.66	13.34	9.98	13.21	12.69	10.57	9.85
ITGA5	MYADM	831	245	838	761	430	0.261	13.21	13.40	7.77	9.66	12.02	9.98	13.88	12.69	11.23	9.85
KLF9	MYADM	433	690	689	564	21	0.064	10.61	13.40	11.57	9.66	12.11	9.98	13.49	12.69	13.62	9.85
ARHGEF3	MYD88	312	82	422	586	551	0.146	10.98	13.89	10.85	7.60	7.58	11.86	10.63	11.56	9.47	8.31
ABLIM1	MYH14	202	443	613	838	651	0.544	11.00	5.65	13.27	10.93	12.16	11.44	13.05	11.57	13.22	14.12
DTYMK	MYL6B	883	545	941	944	123	0.454	8.87	8.45	7.63	11.57	9.04	8.19	7.97	8.02	7.97	12.97
GTSE1	MYL6B	638	169	704	770	42	0.369	7.44	8.45	2.67	11.57	4.54	8.19	4.58	8.02	3.86	12.97
CACNA2D2	MYLIP	105	717	629	512	668	0.006	8.53	11.54	9.49	8.79	5.92	8.11	11.55	10.92	7.82	10.24
FAM117A	MYLIP	127	587	643	765	791	0.282	11.82	11.54	7.18	8.79	9.13	8.11	8.76	10.92	7.96	10.24
MOAP1	MYLIP	867	756	482	832	667	0.286	10.26	11.54	13.04	8.79	9.88	8.11	10.41	10.92	11.25	10.24
C16orf45	MYLK	381	116	275	804	122	0.608	8.03	8.93	13.31	10.94	9.72	12.33	9.12	14.04	11.79	9.98
DCHS1	MYLK	228	717	685	671	872	0.086	8.18	8.93	9.99	10.94	7.99	12.33	11.29	14.04	8.87	9.98
EFEMP2	MYLK	464	749	518	867	833	0.434	9.81	8.93	10.23	10.94	9.16	12.33	11.74	14.04	9.95	9.98
MEF2C	MYLK	479	263	537	798	553	0.551	9.94	8.93	13.20	10.94	8.38	12.33	10.55	14.04	13.17	9.98
MRC2	MYLK	46	721	418	675	821	0.175	9.13	8.93	8.54	10.94	8.71	12.33	13.29	14.04	9.90	9.98
ANAPC11	MYO19	462	540	930	962	563	0.657	10.49	9.65	10.76	9.28	11.07	10.43	10.08	10.02	11.53	10.11
ARL6IP6	MYO19	379	417	696	845	604	0.540	9.89	9.65	8.03	9.28	8.05	10.43	8.71	10.02	8.59	10.11
CCDC43	MYO19	817	796	992	913	318	0.313	8.36	9.65	8.57	9.28	7.94	10.43	7.82	10.02	10.62	10.11
CKS1B	MYO19	848	665	932	871	524	0.288	7.72	9.65	5.80	9.28	8.94	10.43	7.23	10.02	7.10	10.11
COA6	MYO19	518	786	959	943	478	0.512	8.37	9.65	8.80	9.28	8.48	10.43	6.97	10.02	10.03	10.11
COPRS	MYO19	798	689	929	945	733	0.316	8.21	9.65	11.32	9.28	10.36	10.43	9.34	10.02	10.04	10.11
COPS6	MYO19	846	853	986	988	804	0.232	11.09	9.65	11.80	9.28	11.13	10.43	10.99	10.02	11.93	10.11
CPSF3	MYO19	595	919	991	948	775	0.278	10.18	9.65	8.89	9.28	9.52	10.43	9.11	10.02	9.79	10.11
CSE1L	MYO19	881	948	980	981	757	0.179	10.35	9.65	10.96	9.28	10.78	10.43	10.85	10.02	11.76	10.11
CTPS1	MYO19	997	907	563	918	822	0.231	9.54	9.65	9.54	9.28	11.61	10.43	9.69	10.02	10.26	10.11
GEMIN6	MYO19	465	808	852	949	785	0.425	7.90	9.65	7.38	9.28	8.81	10.43	6.74	10.02	8.14	10.11
GMNN	MYO19	810	305	872	919	711	0.392	8.00	9.65	8.02	9.28	8.70	10.43	7.41	10.02	7.73	10.11
HMGXB4	MYO19	873	960	971	964	702	0.178	9.16	9.65	8.62	9.28	9.08	10.43	9.27	10.02	9.77	10.11
HYLS1	MYO19	460	822	593	793	137	0.393	7.77	9.65	7.37	9.28	7.68	10.43	5.26	10.02	6.92	10.11
KPNB1	MYO19	272	864	987	973	567	0.494	13.01	9.65	12.20	9.28	12.11	10.43	12.71	10.02	13.08	10.11
LSM2	MYO19	808	757	988	981	850	0.264	10.20	9.65	8.80	9.28	9.05	10.43	9.17	10.02	9.69	10.11
LSM7	MYO19	896	672	955	984	878	0.268	9.65	9.65	8.76	9.28	9.41	10.43	8.90	10.02	9.31	10.11
MIF	MYO19	500	594	124	566	515	0.091	4.69	9.65	4.51	9.28	5.07	10.43	3.13	10.02	4.00	10.11
MRPL37	MYO19	860	834	863	984	696	0.342	10.67	9.65	10.64	9.28	11.91	10.43	10.10	10.02	12.11	10.11
MTHFD1	MYO19	983	654	382	974	802	0.483	9.68	9.65	10.17	9.28	13.25	10.43	9.91	10.02	11.85	10.11
CAMTA2	MYO1C	455	132	995	933	885	0.457	12.17	10.03	13.05	9.83	10.84	12.30	11.74	14.03	12.22	12.38
FTL	MYO5A	223	6	769	852	675	0.482	18.59	11.30	16.19	13.52	17.22	8.39	18.59	10.50	14.18	10.41
HVCN1	MYO5A	774	1	913	912	384	0.481	10.24	11.30	6.78	13.52	5.32	8.39	6.89	10.50	7.76	10.41
APOE	MYO9B	216	138	390	468	564	0.000	8.26	13.78	14.36	11.86	16.57	11.77	12.62	13.24	8.73	10.53
ARHGEF3	N4BP2L1	996	925	405	733	258	0.233	10.98	10.06	10.85	10.59	7.58	11.78	10.63	10.26	9.47	9.36
BTN3A1	N4BP2L1	942	540	577	750	746	0.194	12.26	10.06	8.62	10.59	10.33	11.78	11.45	10.26	8.58	9.36
GGTA1P	N4BP2L1	591	294	108	675	509	0.300	8.62	10.06	8.03	10.59	6.10	11.78	7.50	10.26	7.13	9.36
HLA-C	N4BP2L1	304	386	173	335	668	0.000	17.12	10.06	11.47	10.59	13.66	11.78	15.67	10.26	11.94	9.36
C20orf27	NAA20	839	860	841	981	830	0.277	11.03	9.18	10.46	10.09	9.43	10.77	9.28	9.97	9.49	11.36
BAZ2A	NAA25	770	970	958	913	998	0.071	13.05	8.98	11.63	9.88	12.10	9.82	13.25	9.99	12.22	11.26
CLUH	NAA25	913	846	745	701	848	0.000	10.59	8.98	11.89	9.88	14.13	9.82	11.53	9.99	13.62	11.26
DHX34	NAA25	304	835	868	661	947	0.081	13.36	8.98	9.75	9.88	10.42	9.82	10.15	9.99	9.82	11.26
DHX37	NAA25	966	877	918	676	974	0.000	9.92	8.98	9.03	9.88	9.58	9.82	9.34	9.99	10.78	11.26
EXOSC4	NAA25	51	605	865	418	815	0.000	10.59	8.98	7.95	9.88	8.96	9.82	7.52	9.99	8.42	11.26
ECE2	NAA50	478	587	983	665	547	0.180	7.85	11.37	10.21	10.86	8.77	11.76	5.65	11.65	7.96	13.45
MICALL1	NAA50	726	291	981	846	918	0.233	10.11	11.37	8.36	10.86	9.45	11.76	10.38	11.65	10.08	13.45
AKNA	NAAA	837	610	201	708	717	0.153	14.35	11.23	9.33	8.10	10.86	10.67	12.28	9.41	8.58	8.49
CD53	NAAA	625	603	258	703	692	0.196	15.30	11.23	8.05	8.10	8.96	10.67	12.14	9.41	7.24	8.49
CD6	NAAA	489	525	428	471	566	0.000	11.48	11.23	5.64	8.10	6.39	10.67	8.00	9.41	4.34	8.49
CYLD	NAAA	803	927	537	666	472	0.147	12.02	11.23	11.09	8.10	10.70	10.67	11.44	9.41	11.98	8.49
CYTH4	NAAA	691	264	128	513	743	0.013	14.41	11.23	6.46	8.10	8.43	10.67	10.87	9.41	7.26	8.49
EMP3	NAAA	716	172	205	629	886	0.129	12.93	11.23	7.03	8.10	8.04	10.67	11.36	9.41	8.15	8.49
FAM78A	NAAA	923	593	364	880	344	0.523	11.43	11.23	9.03	8.10	7.00	10.67	9.04	9.41	10.25	8.49
HLA-DOA	NAAA	618	243	562	804	682	0.427	10.15	11.23	4.67	8.10	6.87	10.67	9.91	9.41	6.18	8.49
HLA-DPB1	NAAA	482	245	390	722	778	0.333	12.12	11.23	7.57	8.10	9.30	10.67	12.84	9.41	8.93	8.49
HLA-DRA	NAAA	651	203	485	783	867	0.349	14.02	11.23	8.60	8.10	10.90	10.67	15.51	9.41	10.70	8.49
HVCN1	NAAA	930	161	536	878	513	0.542	10.24	11.23	6.78	8.10	5.32	10.67	6.89	9.41	7.76	8.49
IL12RB1	NAAA	720	441	516	785	566	0.419	10.74	11.23	4.22	8.10	5.87	10.67	7.13	9.41	3.71	8.49
IL16	NAAA	861	415	532	853	674	0.426	12.89	11.23	5.64	8.10	7.99	10.67	10.96	9.41	8.18	8.49
INPP5D	NAAA	780	412	288	508	756	0.008	14.00	11.23	9.07	8.10	9.11	10.67	11.41	9.41	8.78	8.49
ITGB7	NAAA	483	146	879	535	762	0.035	11.72	11.23	4.64	8.10	8.41	10.67	7.94	9.41	5.52	8.49
LAPTM5	NAAA	780	320	165	751	683	0.285	17.05	11.23	8.70	8.10	10.31	10.67	14.12	9.41	8.61	8.49
LCP1	NAAA	708	313	277	650	718	0.150	17.49	11.23	6.72	8.10	11.25	10.67	13.38	9.41	8.29	8.49
LIPA	NAAA	861	580	793	798	946	0.112	11.54	11.23	10.35	8.10	11.32	10.67	11.92	9.41	9.22	8.49
GAS7	NAALADL1	68	23	975	538	845	0.038	13.36	8.96	14.35	4.64	7.49	5.82	11.95	7.59	9.20	6.40
AMOTL1	NAB1	454	793	687	868	128	0.496	7.62	9.71	9.61	10.14	10.59	10.66	11.84	10.45	14.12	9.11
EIF4A3	NAB1	223	744	697	630	780	0.065	11.92	9.71	9.85	10.14	10.54	10.66	11.12	10.45	10.56	9.11
MAFF	NAB1	50	144	530	425	166	0.000	10.33	9.71	8.34	10.14	9.34	10.66	11.63	10.45	11.37	9.11
MB21D2	NAB1	591	829	692	775	834	0.134	6.56	9.71	7.59	10.14	4.99	10.66	7.56	10.45	8.03	9.11
BAG3	NAB2	978	111	417	523	353	0.035	10.13	9.16	10.80	10.74	10.72	10.24	11.79	10.58	14.54	8.89
BHLHE40	NAB2	984	612	659	642	459	0.086	12.18	9.16	12.40	10.74	13.53	10.24	13.49	10.58	13.85	8.89
EIF4G1	NAB2	846	872	413	645	387	0.145	12.33	9.16	13.13	10.74	14.36	10.24	14.13	10.58	15.01	8.89
MATK	NAGA	185	145	193	665	444	0.330	10.96	11.56	11.41	8.18	6.72	10.75	8.27	10.69	4.03	9.27
HEXB	NAGLU	782	606	959	975	995	0.289	11.77	10.34	9.39	8.40	11.45	11.69	12.18	10.70	10.52	9.55
BYSL	NAMPT	82	449	946	756	958	0.256	8.50	16.57	7.59	10.21	8.72	14.12	7.87	14.13	10.13	12.32
BOP1	NANP	670	815	822	876	884	0.161	8.23	7.12	6.79	5.81	6.88	8.08	6.09	7.02	9.38	7.79
C20orf27	NANP	632	705	733	920	710	0.450	11.03	7.12	10.46	5.81	9.43	8.08	9.28	7.02	9.49	7.79
DHCR7	NANP	202	517	746	930	402	0.729	10.54	7.12	10.79	5.81	13.03	8.08	10.19	7.02	9.04	7.79
GRWD1	NANP	873	882	965	975	973	0.103	9.56	7.12	9.19	5.81	10.37	8.08	9.51	7.02	10.65	7.79
E2F3	NASP	697	352	344	835	624	0.509	10.53	11.16	8.80	11.56	8.37	11.42	8.99	11.89	10.01	11.19
C12orf45	NAT10	944	715	898	965	986	0.169	7.38	10.41	6.16	10.77	7.77	10.55	6.39	10.49	7.36	11.00
EMC10	NAT14	961	751	655	949	964	0.246	11.47	7.83	11.41	10.88	12.05	7.67	11.25	8.05	10.71	6.99
CCSAP	NCAPD3	747	986	833	695	445	0.098	9.70	9.42	11.41	8.60	7.88	9.86	8.33	9.30	7.83	8.93
CDC5L	NCAPD3	434	993	935	963	930	0.262	10.70	9.42	10.40	8.60	10.52	9.86	10.09	9.30	11.43	8.93
CEP250	NCAPD3	907	978	784	965	985	0.119	11.00	9.42	10.42	8.60	9.47	9.86	9.65	9.30	10.08	8.93
CEP57	NCAPD3	933	983	703	826	775	0.087	9.93	9.42	9.74	8.60	11.21	9.86	10.19	9.30	9.85	8.93
CHAF1A	NCAPD3	989	857	958	950	891	0.076	9.43	9.42	8.20	8.60	7.93	9.86	7.87	9.30	9.76	8.93
CLNS1A	NCAPD3	823	896	966	976	788	0.215	10.20	9.42	10.93	8.60	11.38	9.86	10.14	9.30	11.21	8.93
DCK	NCAPD3	888	900	912	976	811	0.197	10.02	9.42	8.83	8.60	7.47	9.86	8.57	9.30	8.79	8.93
HLTF	NCAPD3	775	933	839	967	94	0.410	8.79	9.42	10.44	8.60	9.72	9.86	8.94	9.30	9.40	8.93
MCM2	NCAPD3	972	882	785	945	122	0.334	9.62	9.42	7.30	8.60	7.30	9.86	7.75	9.30	9.31	8.93
MCM4	NCAPD3	991	962	960	964	462	0.235	9.27	9.42	9.68	8.60	8.76	9.86	8.45	9.30	9.90	8.93
DDT	NCAPH2	777	908	512	985	861	0.441	9.68	10.73	8.37	10.76	11.88	9.97	8.07	10.37	9.24	10.35
F11R	NCBP2	692	587	956	752	798	0.113	12.28	10.19	8.53	11.25	12.90	10.65	13.40	10.86	9.37	11.10
C7orf49	NCBP2-AS2	908	519	735	813	703	0.241	10.23	8.51	6.79	9.04	8.59	8.52	8.47	7.56	9.92	9.55
ACAP1	NCKAP1L	945	397	494	557	615	0.057	13.89	13.03	5.01	5.86	8.36	7.94	10.03	11.06	7.66	6.91
CREBL2	NCKAP1L	622	395	881	622	817	0.061	10.34	13.03	11.30	5.86	11.21	7.94	10.87	11.06	9.68	6.91
CYP27A1	NCKAP1L	371	433	149	888	220	0.776	10.83	13.03	10.07	5.86	14.61	7.94	12.12	11.06	10.70	6.91
ESYT1	NCKAP1L	397	422	731	849	624	0.520	11.83	13.03	11.05	5.86	12.42	7.94	12.45	11.06	11.90	6.91
GLUL	NCKAP1L	216	381	549	764	350	0.503	16.05	13.03	17.85	5.86	14.08	7.94	16.28	11.06	16.03	6.91
CYBA	NCOA4	435	252	674	727	302	0.367	14.56	13.45	7.36	11.66	9.97	13.52	12.31	12.55	8.55	13.09
FAM78A	NCOA4	611	652	772	798	423	0.329	11.43	13.45	9.03	11.66	7.00	13.52	9.04	12.55	10.25	13.09
HLA-DMA	NCOA4	52	539	491	706	485	0.393	11.56	13.45	6.73	11.66	8.90	13.52	12.02	12.55	8.66	13.09
HLA-DMB	NCOA4	243	453	617	770	429	0.481	11.24	13.45	5.70	11.66	7.71	13.52	11.23	12.55	7.73	13.09
IRF8	NCOA4	429	516	247	757	288	0.506	11.63	13.45	5.25	11.66	9.65	13.52	10.22	12.55	5.73	13.09
LAIR1	NCOA4	395	445	682	890	249	0.689	12.34	13.45	5.85	11.66	7.48	13.52	11.06	12.55	6.67	13.09
LPXN	NCOA4	279	807	470	855	736	0.439	11.68	13.45	7.10	11.66	8.89	13.52	9.82	12.55	7.67	13.09
BHLHE40	NCOA7	129	461	836	791	192	0.436	12.18	10.06	12.40	11.02	13.53	10.68	13.49	11.28	13.85	9.33
KDM6B	NCOA7	492	328	818	789	597	0.385	13.53	10.06	10.27	11.02	11.21	10.68	12.16	11.28	10.87	9.33
MED11	NCOR1	717	708	853	903	811	0.262	9.90	11.90	6.95	12.00	8.79	12.04	7.85	12.07	8.89	12.45
MUC1	NCSTN	700	489	360	768	565	0.404	7.78	12.58	5.89	10.73	6.42	11.52	13.63	12.10	6.42	11.40
ARL6IP6	NDC1	725	419	669	926	656	0.577	9.89	8.65	8.03	8.07	8.05	9.13	8.71	8.35	8.59	9.21
FSTL3	NDEL1	218	295	660	729	804	0.264	9.10	12.82	9.56	11.55	9.80	11.26	13.14	11.58	9.14	11.16
ITGA5	NDEL1	854	49	751	764	950	0.139	13.21	12.82	7.77	11.55	12.02	11.26	13.88	11.58	11.23	11.16
CD74	NDFIP1	66	162	594	732	743	0.301	16.09	11.53	11.52	13.66	13.32	12.77	16.98	12.23	12.63	11.61
KIAA0141	NDFIP1	749	806	965	923	974	0.145	11.45	11.53	11.48	13.66	11.87	12.77	12.06	12.23	11.89	11.61
MUC1	NDFIP1	569	49	157	602	602	0.118	7.78	11.53	5.89	13.66	6.42	12.77	13.63	12.23	6.42	11.61
ARHGAP24	NDRG2	51	106	854	810	158	0.465	10.10	8.85	9.37	16.77	8.04	13.94	9.50	12.41	8.45	15.25
GFOD1	NDRG2	501	2	221	830	247	0.659	10.38	8.85	12.07	16.77	10.03	13.94	10.91	12.41	11.02	15.25
CDCA4	NDUFA12	869	570	869	877	725	0.237	8.56	10.05	4.77	10.52	6.78	9.97	6.79	9.63	6.31	11.80
HEATR2	NDUFA4	501	447	979	990	871	0.554	8.69	10.70	8.82	14.15	9.43	12.68	9.13	12.19	10.37	14.23
KIFC1	NDUFA9	477	178	809	649	104	0.224	8.16	10.64	2.52	10.66	4.78	11.27	5.93	10.28	4.27	12.48
C19orf48	NDUFAB1	679	737	635	996	370	0.717	9.78	9.58	7.96	10.97	10.20	11.20	8.88	9.78	8.59	12.12
CDK4	NDUFAF5	830	541	922	631	669	0.045	9.61	8.15	8.57	8.89	9.68	8.67	10.22	8.13	9.93	9.97
EIF4EBP1	NDUFAF5	580	156	845	538	118	0.038	10.27	8.15	5.74	8.89	10.68	8.67	9.06	8.13	10.77	9.97
MAF1	NDUFAF6	482	775	584	890	955	0.406	12.51	8.08	11.38	8.73	11.11	9.43	11.77	7.73	13.29	9.90
ADCK1	NDUFB1	178	683	771	928	614	0.572	8.88	9.40	8.90	10.58	8.96	10.91	7.68	9.47	9.31	11.47
HN1L	NDUFB10	890	202	882	957	314	0.528	9.83	11.10	8.62	11.32	11.82	11.49	10.75	10.35	10.47	13.23
C7orf49	NDUFB2	525	616	961	846	382	0.449	10.23	9.79	6.79	11.22	8.59	11.05	8.47	10.01	9.92	11.98
CPSF4	NDUFB2	915	879	891	895	408	0.207	9.86	9.79	10.18	11.22	9.49	11.05	9.24	10.01	10.35	11.98
LPAR2	NDUFB7	600	491	593	697	377	0.297	13.25	10.61	7.45	11.13	7.66	11.54	9.90	10.16	6.05	12.11
E2F1	NDUFS3	458	841	762	893	373	0.484	9.19	10.51	8.23	11.54	5.88	11.27	7.10	10.03	7.02	12.33
CDCA4	NDUFS6	821	430	865	972	691	0.505	8.56	10.16	4.77	10.10	6.78	10.96	6.79	9.62	6.31	11.57
[truncated: 4,621 more rows]
