# Supplementary material for: Differential coexpression in human tissues and the confounding effect of mean expression levels
Source: Bioinformatics. 2018 Jul 3;35(1):55–61. doi: 10.1093/bioinformatics/bty538 (PMC6298061; doi:10.1093/bioinformatics/bty538)
Supplement: Supplementary Data [file bty538_suppl_data.zip › TSlinksTSS_muscle_pureLinks_GTEx_exp.csv]

gene_A	gene_B	blood_corr	brain_cortex_corr	liver_corr	lung_corr	skeletalMuscle_corr	GTExTSS	gA_bloodExp	gB_bloodExp	gA_brainExp	gB_brainExp	gA_liverExp	gB_liverExp	gA_lungExp	gB_lungExp	gA_muscleExp	gB_muscleExp
ADAM28	AQP3	765	257	471	282	408	0.000	9.17	9.85	5.51	4.58	5.64	12.66	7.46	11.45	5.07	7.94
ADRM1	ASB10	0	0	0	0	20	0.000	11.45	1.72	10.60	0.21	11.50	0.60	10.89	0.28	12.82	10.74
ARL6IP4	ASB10	0	0	0	0	907	0.000	11.78	1.72	12.07	0.21	12.40	0.60	11.58	0.28	11.86	10.74
AHCYL1	ASXL1	701	302	523	892	940	0.572	11.39	11.52	14.46	11.30	12.09	12.28	12.49	12.90	12.94	12.13
ASB10	ATG9A	101	108	96	50	42	0.000	1.72	12.65	0.21	12.44	0.60	11.96	0.28	11.78	10.74	13.43
APOL3	ATP2B4	373	174	26	783	812	0.482	10.97	12.47	7.91	12.63	10.83	11.68	11.90	13.52	10.24	10.86
BCL6	BUB3	161	618	740	466	883	0.587	15.42	11.10	11.51	10.26	12.59	11.07	13.82	11.01	14.96	10.86
ASB10	C16orf13	101	108	96	50	837	0.674	1.72	10.28	0.21	11.15	0.60	10.34	0.28	9.75	10.74	10.40
ARSD	CACNA1A	727	90	121	342	719	0.329	10.03	6.74	7.62	12.45	11.49	4.17	9.70	3.88	7.24	6.00
AKAP17A	CAMK2B	120	590	433	282	862	0.679	12.76	5.38	10.74	14.04	12.61	9.15	12.41	3.76	10.99	12.91
CAMK2B	CASC3	93	394	165	158	558	0.116	5.38	13.41	14.04	12.50	9.15	11.55	3.76	12.73	12.91	12.48
AGGF1	CCDC59	883	794	925	946	895	0.057	9.68	9.24	10.40	7.95	9.83	8.80	9.49	8.72	10.24	9.65
AFF4	CCNDBP1	180	790	686	539	880	0.502	11.09	12.79	11.54	10.52	12.38	10.01	12.58	10.76	12.39	11.19
ASB10	CDC34	101	108	96	50	721	0.442	1.72	12.53	0.21	11.11	0.60	11.54	0.28	10.15	10.74	11.56
ASB10	CDC37	101	108	96	50	864	0.728	1.72	12.73	0.21	12.87	0.60	12.45	0.28	13.34	10.74	13.20
C3orf58	CDIPT	697	768	752	894	829	0.135	9.34	12.04	9.11	12.09	9.72	12.27	9.02	11.79	8.41	10.92
ACVR1	CELF1	945	788	843	741	905	0.172	8.89	12.44	8.49	12.02	9.85	13.05	9.97	12.89	9.92	12.79
ATP2A2	CFLAR	530	39	606	750	58	0.000	11.26	14.14	13.85	10.79	13.40	12.55	13.45	14.34	16.43	13.98
ANKH	CHD2	435	794	869	856	786	0.143	10.99	12.44	12.55	12.00	11.70	12.11	10.76	13.17	12.06	12.39
C15orf52	CHERP	899	292	500	826	550	0.050	8.28	10.15	8.91	10.30	8.90	10.50	10.59	9.91	12.32	10.98
ACVR2B	CLCN3	569	914	565	509	733	0.278	7.13	10.03	8.93	11.90	9.31	10.78	8.26	10.48	9.60	10.99
ACVR1	CMBL	185	820	163	933	218	0.000	8.89	7.17	8.49	9.51	9.85	12.25	9.97	8.09	9.92	12.16
ANK3	CMBL	194	140	371	732	444	0.000	7.81	7.17	12.43	9.51	9.32	12.25	9.27	8.09	11.64	12.16
AKT3	CMTM6	154	242	253	563	960	0.888	9.09	12.87	11.69	8.19	8.17	12.51	10.97	11.43	9.55	8.55
AKIP1	CNST	855	857	584	783	342	0.000	8.47	9.99	9.07	10.65	8.52	10.68	8.65	10.31	9.48	11.69
BAIAP2-AS1	COL11A2	461	661	303	297	416	0.000	9.19	7.35	11.71	9.94	9.16	7.10	9.67	6.56	6.66	7.66
ATP1B3	COL18A1	104	492	85	565	700	0.367	11.47	11.97	11.55	10.21	9.07	15.08	12.73	13.12	10.33	10.94
CCDC59	COL4A3BP	805	794	916	972	958	0.179	9.24	11.33	7.95	10.76	8.80	10.66	8.72	10.94	9.65	11.73
CCNT1	COL4A3BP	844	861	890	853	980	0.236	10.63	11.33	9.04	10.76	10.40	10.66	10.67	10.94	10.84	11.73
CCDC109B	CPQ	499	586	765	776	969	0.625	10.24	12.17	5.46	8.78	6.05	10.38	8.12	10.49	6.87	8.81
CCDC6	CRIPAK	593	395	537	734	865	0.548	10.12	10.25	11.23	9.12	10.15	10.36	11.17	10.23	11.20	9.72
CDC73	CRIPAK	743	628	445	525	974	0.750	10.74	10.25	9.08	9.12	9.54	10.36	10.10	10.23	10.62	9.72
ANKRD13C	CSAD	729	852	438	757	835	0.260	8.77	11.03	9.68	10.15	9.19	12.01	9.41	10.37	10.03	9.53
CDC73	CSAD	946	768	58	592	846	0.339	10.74	11.03	9.08	10.15	9.54	12.01	10.10	10.37	10.62	9.53
CNPPD1	CSNK1G2	342	453	653	201	940	0.803	12.72	12.88	10.67	12.03	11.15	11.37	11.10	11.95	11.93	11.22
ARHGEF37	CTCF	145	493	746	838	793	0.317	7.59	11.18	10.09	10.48	7.97	10.51	8.61	10.58	10.94	11.26
ASB10	CTDNEP1	101	108	96	50	896	0.792	1.72	12.87	0.21	11.81	0.60	11.19	0.28	12.01	10.74	13.51
CAMK2B	CTDNEP1	125	876	88	128	787	0.430	5.38	12.87	14.04	11.81	9.15	11.19	3.76	12.01	12.91	13.51
CBX7	CUEDC1	966	250	755	660	926	0.431	11.78	10.25	13.75	10.37	10.79	8.85	11.81	10.67	12.54	11.96
CA2	CUEDC2	20	430	684	593	731	0.324	10.29	10.84	10.88	11.45	12.01	10.39	9.30	10.22	10.45	11.37
CACNB1	CYB561A3	463	765	126	765	919	0.573	9.26	10.92	12.23	8.67	6.11	10.60	9.65	10.33	13.45	10.53
CTSK	DAP	555	453	282	449	989	0.951	9.37	12.13	6.74	10.71	8.27	13.23	10.25	12.28	9.04	9.03
CSPP1	DCUN1D1	727	931	881	853	965	0.234	8.03	10.50	8.72	10.02	9.25	10.60	9.30	9.57	10.27	11.23
BAIAP2-AS1	DERL3	266	411	600	344	147	0.000	9.19	9.07	11.71	6.02	9.16	7.95	9.67	7.73	6.66	7.07
DCTN1	DES	150	203	443	374	944	0.888	12.35	9.74	14.71	7.62	11.81	8.60	12.86	13.06	13.08	18.27
AGFG1	DKFZP586I1420	0	0	0	0	0	0.000	13.03	0.00	11.30	0.00	10.83	0.00	12.10	0.00	11.31	0.00
ATP2B1	DLG5	803	745	799	670	779	0.071	11.12	8.43	12.96	9.96	10.17	8.84	10.84	9.99	11.09	11.51
COMT	DNAJA4	162	212	132	203	158	0.000	10.94	10.69	11.40	12.11	12.87	7.50	11.74	10.03	11.31	11.99
DCUN1D2	DNAJB6	894	846	723	799	975	0.319	9.71	12.05	9.75	12.04	9.18	11.19	8.97	11.97	11.64	13.83
DLG5	DNAJB9	655	811	553	499	877	0.494	8.43	10.08	9.96	9.70	8.84	12.42	9.99	10.56	11.51	11.03
CMBL	DNASE1L1	19	766	55	794	690	0.190	7.17	10.51	9.51	8.00	12.25	8.61	8.09	8.93	12.16	11.43
ANKRD10	DNTTIP2	948	894	308	474	853	0.353	11.48	10.93	11.54	10.13	12.09	10.18	12.48	10.79	12.90	11.66
AZIN1	DST	501	458	583	581	786	0.489	11.79	8.25	12.26	14.78	11.96	13.41	11.80	14.55	11.51	14.21
BCAP29	DST	519	531	379	763	622	0.158	9.75	8.25	11.41	14.78	10.31	13.41	10.96	14.55	11.28	14.21
CCT2	DST	648	559	265	171	454	0.000	10.71	8.25	11.58	14.78	11.20	13.41	11.54	14.55	12.17	14.21
AKTIP	DUSP10	7	376	169	585	643	0.243	10.10	9.50	11.35	6.60	9.95	10.66	9.76	8.03	11.55	8.98
DLG5	DYNC1LI1	24	892	908	552	883	0.357	8.43	10.99	9.96	10.45	8.84	9.50	9.99	10.00	11.51	11.36
CYBRD1	DYNLT3	415	123	558	826	707	0.281	10.73	8.76	10.79	10.91	9.89	10.53	13.57	10.06	11.05	9.44
ASB10	EEF1D	101	108	96	50	659	0.318	1.72	13.45	0.21	11.95	0.60	13.19	0.28	13.28	10.74	13.56
EEF2	EHBP1L1	610	608	774	574	908	0.533	16.28	13.54	17.05	9.83	15.47	10.32	16.50	12.71	16.31	14.37
COL6A1	ELOVL1	111	258	493	508	269	0.000	8.83	11.88	12.83	10.42	13.28	10.69	15.30	11.54	12.76	9.80
ACTN1	ELOVL5	788	354	328	858	966	0.609	14.08	12.27	12.23	11.15	12.55	12.33	13.65	12.34	10.75	9.27
CD248	ELOVL5	318	482	55	420	632	0.264	7.61	12.27	6.40	11.15	7.42	12.33	10.89	12.34	9.61	9.27
CTSK	ELOVL5	801	422	129	148	798	0.447	9.37	12.27	6.74	11.15	8.27	12.33	10.25	12.34	9.04	9.27
DAB2	ELOVL5	503	624	105	837	947	0.662	10.19	12.27	7.96	11.15	9.53	12.33	12.96	12.34	10.09	9.27
ATP5B	EPAS1	369	163	836	418	520	0.030	13.74	9.57	14.91	12.89	14.35	13.73	14.31	17.49	15.46	12.61
ASXL1	ERBB2	917	373	512	524	536	0.036	11.52	9.14	11.30	9.47	12.28	11.38	12.90	12.06	12.13	10.91
ANKRD10	ETF1	840	861	233	587	885	0.376	11.48	11.99	11.54	11.25	12.09	11.60	12.48	12.50	12.90	12.72
CMBL	FAM126A	119	454	273	200	336	0.000	7.17	9.19	9.51	8.24	12.25	9.44	8.09	10.83	12.16	11.27
ARPC5	FAM13A	763	835	328	670	885	0.386	13.95	9.97	10.76	10.53	11.65	11.26	12.93	10.10	9.54	9.99
ATP1B3	FAM172A	298	902	691	498	873	0.464	11.47	9.69	11.55	9.69	9.07	8.45	12.73	9.23	10.33	8.45
DAB2	FAM172A	415	703	763	727	861	0.376	10.19	9.69	7.96	9.69	9.53	8.45	12.96	9.23	10.09	8.45
ELOVL5	FAM172A	980	548	386	596	794	0.369	12.27	9.69	11.15	9.69	12.33	8.45	12.34	9.23	9.27	8.45
CPQ	FAM3C	160	79	422	896	889	0.584	12.17	8.81	8.78	11.65	10.38	11.01	10.49	10.81	8.81	9.88
DHCR7	FAM73B	524	619	285	421	950	0.829	10.54	11.27	10.79	10.98	13.03	10.69	10.19	10.40	9.04	10.36
DENND5B	FAR1	244	773	620	850	990	0.609	7.39	11.68	10.50	11.30	10.37	8.50	7.97	11.70	10.54	10.98
C15orf52	FBXO31	778	93	473	453	676	0.264	8.28	10.20	8.91	11.80	8.90	11.82	10.59	10.58	12.32	12.48
DNTTIP2	FBXO38	904	954	808	771	986	0.254	10.93	11.36	10.13	9.64	10.18	10.37	10.79	10.48	11.66	10.98
CDC73	FBXO9	764	550	867	794	918	0.348	10.74	12.00	9.08	11.67	9.54	11.88	10.10	11.14	10.62	11.01
CELF1	FGD5-AS1	989	740	930	751	991	0.277	12.44	11.15	12.02	12.46	13.05	11.77	12.89	12.29	12.79	12.67
CASP10	FGFR2	144	530	654	497	605	0.142	11.46	5.05	6.76	11.85	9.44	10.94	10.46	9.19	8.28	4.66
ASB10	FLAD1	101	108	96	50	194	0.000	1.72	10.40	0.21	9.31	0.60	10.31	0.28	9.53	10.74	10.42
DNAJA4	FLNC	221	472	754	536	576	0.096	10.69	8.00	12.11	8.86	7.50	7.26	10.03	10.88	11.99	16.98
CYBRD1	FMR1	681	344	691	933	973	0.543	10.73	10.61	10.79	11.23	9.89	11.53	13.57	10.91	11.05	9.82
ATP6V0A1	FOXN3	800	496	741	709	752	0.153	11.61	11.88	13.73	10.40	11.24	11.47	11.48	11.86	12.41	13.13
ATG16L1	FOXO4	245	203	748	702	899	0.573	10.62	11.98	10.65	11.09	10.54	9.12	10.02	9.52	10.81	12.03
ADA	FXYD6	120	138	882	358	911	0.631	10.05	8.59	6.77	13.22	7.50	8.56	8.07	10.69	8.35	8.78
ASB10	GADD45GIP1	101	108	96	50	687	0.374	1.72	10.03	0.21	10.36	0.60	10.52	0.28	9.45	10.74	11.05
ATXN7	GALNT2	277	905	250	156	907	0.612	11.17	11.49	9.38	10.54	10.34	13.07	10.77	11.43	10.57	12.23
APOO	GLTPD1	763	950	712	863	960	0.276	8.02	10.44	9.77	10.35	8.10	11.77	6.73	9.22	9.50	10.53
CMC2	GLTPD1	109	943	833	543	781	0.260	8.88	10.44	10.09	10.35	9.61	11.77	8.51	9.22	9.74	10.53
FAM96A	GLTPD1	811	722	572	974	854	0.229	9.94	10.44	8.24	10.35	12.15	11.77	9.36	9.22	10.26	10.53
FAM172A	GMFB	1000	958	883	925	999	0.116	9.69	10.33	9.69	12.09	8.45	10.44	9.23	10.79	8.45	9.35
FAM78A	GNA11	708	753	727	768	656	0.000	11.43	8.12	9.03	12.05	7.00	11.09	9.04	11.71	10.25	11.81
ANK3	GNA13	598	52	271	74	599	0.149	7.81	12.69	12.43	10.20	9.32	10.42	9.27	11.93	11.64	11.95
BECN1	GOLGA4	923	866	967	943	984	0.118	11.06	10.15	9.93	11.48	9.52	12.65	10.02	12.11	11.41	13.76
DIP2C	GPCPD1	489	596	402	311	592	0.138	6.76	13.13	11.03	11.10	10.38	10.29	9.73	12.80	11.82	11.02
ASXL1	GPD2	746	528	905	530	591	0.062	11.52	10.15	11.30	10.51	12.28	8.40	12.90	10.24	12.13	11.19
ASB10	GPS1	101	108	96	50	418	0.000	1.72	11.61	0.21	12.11	0.60	12.22	0.28	11.55	10.74	12.48
ATL3	GRK5	465	278	505	652	984	0.889	11.01	10.32	9.69	9.23	11.60	9.60	12.12	12.38	10.15	9.63
AGO4	GSPT1	12	938	602	632	972	0.608	12.14	12.38	10.09	11.61	10.37	11.97	11.34	12.26	11.09	13.14
ASAP1	GUSB	592	387	841	682	993	0.678	12.51	11.74	11.04	9.61	9.80	12.29	12.25	11.43	10.57	9.89
ASB1	H1FX	63	404	466	554	523	0.035	10.59	12.06	11.20	11.04	10.02	11.16	10.28	11.44	11.55	10.99
ARSD	HAGHL	119	276	105	265	782	0.564	10.03	8.82	7.62	10.48	11.49	6.43	9.70	7.59	7.24	5.56
GNAO1	HAUS5	897	609	547	678	595	0.024	7.82	9.51	14.47	9.08	11.06	9.33	6.02	9.30	7.57	9.09
ARHGEF6	HCCS	974	279	619	362	594	0.094	11.94	9.84	10.49	8.58	8.77	9.03	11.28	8.48	11.80	10.87
ARHGEF37	HECA	92	410	138	476	792	0.584	7.59	12.22	10.09	10.30	7.97	9.84	8.61	11.54	10.94	11.29
EEF2K	HECA	736	573	562	525	210	0.000	8.92	12.22	9.18	10.30	10.05	9.84	10.41	11.54	11.67	11.29
CELF1	HERPUD2	988	845	891	698	995	0.279	12.44	11.15	12.02	9.67	13.05	10.27	12.89	10.08	12.79	9.91
GDF11	HFE	278	229	604	436	433	0.000	8.32	8.12	9.91	5.11	6.72	9.11	7.65	7.59	7.61	7.08
ANK3	HIST1H2AC	286	240	349	2	655	0.310	7.81	13.01	12.43	8.29	9.32	10.98	9.27	9.89	11.64	10.03
CALM1	HIST1H2AC	611	21	713	244	852	0.542	13.48	13.01	17.96	8.29	13.06	10.98	14.18	9.89	14.88	10.03
HEXIM1	HIST1H2AC	465	203	606	75	919	0.785	11.28	13.01	10.61	8.29	11.03	10.98	10.64	9.89	10.98	10.03
CMBL	HIVEP2	121	565	39	20	480	0.000	7.17	10.17	9.51	11.93	12.25	9.54	8.09	10.68	12.16	11.64
CHPT1	HMOX2	208	151	656	748	934	0.666	11.93	11.09	10.85	11.58	11.91	11.59	10.99	10.45	10.38	9.99
BOC	HNMT	225	412	234	524	907	0.802	4.61	9.06	8.48	8.41	5.69	11.87	8.57	9.89	9.11	7.84
COL1A1	HNMT	60	207	205	441	876	0.752	8.40	9.06	6.87	8.41	11.90	11.87	14.71	9.89	10.66	7.84
ELOVL5	HNMT	739	283	89	90	813	0.506	12.27	9.06	11.15	8.41	12.33	11.87	12.34	9.89	9.27	7.84
FSTL1	HNMT	434	469	218	486	940	0.880	8.75	9.06	10.39	8.41	11.17	11.87	14.56	9.89	11.59	7.84
GRB2	HNRNPA3	212	900	934	714	927	0.334	12.88	12.79	11.13	12.86	10.55	13.15	11.21	14.01	10.90	12.81
ANKRD10	HNRNPLL	987	870	408	904	734	0.117	11.48	10.42	11.54	9.82	12.09	9.27	12.48	10.33	12.90	9.98
ERBB2	HNRNPM	785	390	116	804	788	0.289	9.14	12.45	9.47	12.31	11.38	12.76	12.06	13.13	10.91	12.93
EFEMP2	HPCAL1	794	197	712	686	629	0.065	9.81	12.64	10.23	12.89	9.16	11.39	11.74	12.55	9.95	9.88
ANKRD10	HPRT1	965	582	599	584	937	0.523	11.48	9.75	11.54	11.07	12.09	9.30	12.48	8.69	12.90	9.56
BAIAP2-AS1	HR	122	914	38	291	512	0.018	9.19	4.43	11.71	11.76	9.16	5.79	9.67	6.17	6.66	7.15
ACVR2B	HSPBAP1	261	779	547	696	841	0.421	7.13	11.01	8.93	7.53	9.31	8.23	8.26	8.95	9.60	10.16
ARHGEF6	IDI1	832	371	103	92	678	0.267	11.94	11.68	10.49	11.88	8.77	12.37	11.28	11.45	11.80	12.33
ARFGAP3	IFFO1	870	687	65	145	459	0.000	11.41	11.53	9.68	11.27	11.52	10.44	11.26	10.92	10.91	10.23
CYBRD1	IFT20	729	76	508	690	878	0.542	10.73	9.23	10.79	8.89	9.89	9.17	13.57	8.40	11.05	7.93
APP	IGF1	435	664	184	328	890	0.698	11.62	5.41	15.56	5.91	13.71	11.82	15.23	9.51	12.32	9.58
ARPC5	IGF1	64	546	130	440	906	0.789	13.95	5.41	10.76	5.91	11.65	11.82	12.93	9.51	9.54	9.58
ATL3	IGF1	73	42	283	693	928	0.759	11.01	5.41	9.69	5.91	11.60	11.82	12.12	9.51	10.15	9.58
ATP6AP2	IGF1	179	787	314	591	931	0.673	12.10	5.41	12.38	5.91	11.55	11.82	12.27	9.51	10.23	9.58
CLIC4	IGF1	414	3	407	347	891	0.782	10.09	5.41	11.33	5.91	11.83	11.82	14.16	9.51	11.51	9.58
CYBRD1	IGF1	105	44	142	46	852	0.704	10.73	5.41	10.79	5.91	9.89	11.82	13.57	9.51	11.05	9.58
CFL1	IGFBP4	53	440	594	684	924	0.709	15.89	9.15	15.19	10.00	13.64	15.82	14.96	14.91	12.51	12.06
GNA13	IGIP	741	410	43	670	771	0.337	12.69	7.64	10.20	11.58	10.42	9.61	11.93	9.50	11.95	9.77
ANKH	IKBKB	189	497	807	874	741	0.241	10.99	11.86	12.55	10.09	11.70	10.97	10.76	11.86	12.06	11.38
AP2S1	IL11RA	201	402	314	64	878	0.756	11.67	10.19	11.54	9.85	11.29	11.03	10.76	9.90	10.67	9.78
DDHD2	IL13RA1	73	251	819	948	864	0.387	9.57	12.26	11.79	8.64	9.56	12.92	10.54	12.22	10.54	11.50
AKAP13	ING3	963	575	620	648	748	0.201	12.96	9.41	10.43	7.94	12.05	8.68	14.07	8.65	13.05	8.76
ALYREF	INPP5A	413	695	786	595	791	0.294	10.57	10.68	8.75	10.60	9.23	9.64	9.68	10.72	10.11	11.56
CAPN3	INPP5A	669	162	158	649	502	0.002	10.90	10.68	10.87	10.60	11.03	9.64	10.84	10.72	14.61	11.56
G3BP1	INPP5A	723	542	887	760	782	0.161	11.25	10.68	10.66	10.60	12.29	9.64	12.48	10.72	12.76	11.56
CAMK2B	INPPL1	117	74	185	204	690	0.380	5.38	12.89	14.04	11.71	9.15	11.93	3.76	13.14	12.91	13.03
EHBP1	IQGAP1	374	81	608	639	497	0.000	8.41	14.25	11.16	10.93	11.25	10.17	9.69	13.94	9.81	12.39
CEND1	IRF5	313	239	700	375	287	0.000	4.79	11.37	13.85	6.65	3.53	8.62	2.48	9.75	3.58	6.39
ICA1	IRF5	521	399	643	765	778	0.342	8.47	11.37	10.46	6.65	8.31	8.62	9.19	9.75	7.61	6.39
ARHGEF6	ISCA1	621	365	679	756	624	0.064	11.94	10.22	10.49	10.89	8.77	10.15	11.28	9.47	11.80	11.43
EPAS1	ISOC1	392	551	675	377	339	0.000	9.57	8.60	12.89	7.93	13.73	11.53	17.49	8.60	12.61	9.05
ARFGEF2	ITSN1	719	920	949	947	960	0.152	9.76	9.26	10.80	12.37	11.48	11.69	11.11	10.58	11.32	10.89
BRCC3	ITSN1	572	952	905	853	986	0.331	8.70	9.26	8.85	12.37	8.86	11.69	8.05	10.58	9.78	10.89
DDX18	ITSN1	692	891	967	798	836	0.091	10.58	9.26	10.07	12.37	10.87	11.69	10.98	10.58	10.73	10.89
FBXO28	ITSN1	557	957	811	952	958	0.278	9.83	9.26	9.82	12.37	10.37	11.69	9.81	10.58	10.69	10.89
FIGNL1	ITSN1	619	817	469	702	882	0.445	7.10	9.26	7.78	12.37	7.89	11.69	6.90	10.58	8.27	10.89
GRB2	ITSN1	309	928	956	820	987	0.372	12.88	9.26	11.13	12.37	10.55	11.69	11.21	10.58	10.90	10.89
EXOSC8	JADE1	0	0	0	0	0	0.000	9.10	0.00	7.71	0.00	9.15	0.00	9.00	0.00	9.55	0.00
FANCL	JADE1	0	0	0	0	0	0.000	6.77	0.00	8.12	0.00	8.70	0.00	7.35	0.00	7.89	0.00
ELOVL5	JAG1	956	755	154	604	990	0.573	12.27	8.20	11.15	9.19	12.33	9.31	12.34	12.08	9.27	10.40
ARHGEF40	JAG2	1	198	433	823	794	0.441	12.31	7.14	10.53	11.16	12.32	7.71	11.68	10.25	10.77	10.78
HDAC9	JARID2	795	391	665	486	7	0.000	8.49	11.30	9.53	9.84	5.65	8.90	7.21	9.96	8.21	10.48
CEP95	JKAMP	318	787	435	685	801	0.366	9.71	10.19	9.53	9.67	10.14	9.87	10.20	9.78	10.14	9.71
ARHGEF6	JTB	794	379	525	420	81	0.000	11.94	12.47	10.49	11.73	8.77	12.65	11.28	12.02	11.80	12.04
ASB16	JUP	29	573	153	641	618	0.141	6.82	9.59	3.22	9.46	4.53	12.57	4.00	12.60	10.15	12.64
FHL3	JUP	464	185	380	271	978	0.956	11.56	9.59	8.18	9.46	7.96	12.57	9.51	12.60	15.11	12.64
CAMSAP1	KAT2B	807	111	294	862	716	0.216	9.52	11.38	11.59	11.46	9.52	10.96	10.25	10.49	12.39	11.94
EHBP1	KCTD12	365	605	571	936	874	0.473	8.41	11.50	11.16	10.38	11.25	8.50	9.69	12.91	9.81	10.85
ARSD	KCTD17	406	70	73	567	923	0.812	10.03	9.45	7.62	11.59	11.49	6.85	9.70	8.17	7.24	6.49
C15orf52	KDM2A	684	519	618	671	692	0.138	8.28	13.07	8.91	11.88	8.90	12.61	10.59	13.04	12.32	12.71
ASB10	KEAP1	101	108	96	50	73	0.000	1.72	10.81	0.21	11.20	0.60	11.48	0.28	10.67	10.74	13.07
CAMK2B	KEAP1	173	829	186	67	179	0.000	5.38	10.81	14.04	11.20	9.15	11.48	3.76	10.67	12.91	13.07
ASB10	KIAA0195	101	108	96	50	808	0.616	1.72	11.26	0.21	13.01	0.60	11.42	0.28	12.04	10.74	12.31
CAMK2B	KIAA0195	244	365	95	162	950	0.900	5.38	11.26	14.04	13.01	9.15	11.42	3.76	12.04	12.91	12.31
GLTPD1	KIAA0391	935	620	401	906	589	0.044	10.44	10.32	10.35	8.97	11.77	9.67	9.22	9.33	10.53	9.70
IDS	KIAA0907	896	418	654	885	925	0.383	13.30	10.82	16.84	11.02	11.36	11.35	13.02	11.89	11.79	11.47
C6orf48	KIAA1671	774	264	325	695	427	0.000	11.18	7.51	11.00	11.22	10.46	12.20	11.84	10.60	10.56	11.55
CNOT2	KIAA1715	859	802	902	823	960	0.227	11.06	10.16	10.34	9.94	10.84	10.12	11.26	9.48	11.04	11.10
IGF1	KIDINS220	167	518	394	214	740	0.471	5.41	11.10	5.91	11.92	11.82	11.01	9.51	12.03	9.58	11.43
CAMK2B	KIF1C	339	9	32	74	450	0.000	5.38	11.02	14.04	13.37	9.15	13.19	3.76	13.58	12.91	15.45
GPS1	KIF1C	851	196	696	957	923	0.361	11.61	11.02	12.11	13.37	12.22	13.19	11.55	13.58	12.48	15.45
CAMK2D	KIF5B	552	156	662	918	840	0.403	9.69	11.40	11.23	13.43	10.78	11.47	11.40	12.93	12.75	13.09
ASB10	KLHDC3	101	108	96	50	988	0.976	1.72	11.43	0.21	13.83	0.60	11.79	0.28	11.23	10.74	12.47
IGF1	KLHL5	233	17	233	291	713	0.426	5.41	9.42	5.91	10.29	11.82	10.64	9.51	10.16	9.58	8.89
KANSL3	KPNA1	846	992	615	916	982	0.284	11.22	11.33	11.52	10.72	11.48	10.87	11.99	10.73	12.50	12.74
ALDH3A2	LAMC1	664	818	559	596	698	0.138	10.03	8.97	10.92	9.52	13.35	10.85	12.04	14.22	11.88	13.10
CLPTM1L	LAMC1	746	540	752	817	967	0.506	11.35	8.97	10.83	9.52	12.89	10.85	12.10	14.22	10.50	13.10
DCTD	LAMC1	342	560	881	882	960	0.508	10.49	8.97	10.90	9.52	11.61	10.85	10.97	14.22	10.60	13.10
GNG2	LAMC1	420	209	569	392	732	0.429	12.13	8.97	10.78	9.52	7.63	10.85	8.88	14.22	7.29	13.10
ANKRD10	LCLAT1	962	765	227	619	200	0.000	11.48	8.60	11.54	6.96	12.09	8.67	12.48	7.98	12.90	8.42
CBX5	LCOR	583	866	853	968	925	0.236	10.41	9.98	12.06	8.74	10.83	9.70	11.63	9.61	10.85	9.82
FLJ23867	LEF1	101	108	96	50	47	0.000	0.00	10.52	0.00	7.93	0.00	4.32	0.00	7.56	0.00	3.91
APP	LGALS3	331	20	886	776	996	0.661	11.62	12.33	15.56	10.38	13.71	8.29	15.23	13.20	12.32	10.66
C16orf80	LGALS3	441	37	408	834	941	0.715	9.28	12.33	10.04	10.38	9.73	8.29	8.98	13.20	8.51	10.66
DOCK9	LGALS3	143	38	774	458	906	0.675	9.30	12.33	12.33	10.38	9.87	8.29	13.22	13.20	10.88	10.66
GNG2	LGALS3BP	516	8	671	513	979	0.858	12.13	10.16	10.78	10.73	7.63	12.43	8.88	13.85	7.29	10.06
ATP6AP2	LINC00341	913	21	108	794	811	0.320	12.10	9.93	12.38	6.74	11.55	8.42	12.27	8.72	10.23	8.05
COL1A1	LINC00341	18	327	241	386	886	0.772	8.40	9.93	6.87	6.74	11.90	8.42	14.71	8.72	10.66	8.05
LASP1	LINC00341	991	35	135	817	964	0.537	13.69	9.93	12.15	6.74	12.63	8.42	12.98	8.72	10.19	8.05
JAG1	LIPA	696	275	433	90	960	0.822	8.20	11.54	9.19	10.35	9.31	11.32	12.08	11.92	10.40	9.22
BAIAP2-AS1	LLGL1	545	105	922	955	897	0.374	9.19	9.71	11.71	11.65	9.16	8.04	9.67	9.26	6.66	10.12
GTF3A	LMO2	622	158	749	477	797	0.408	11.71	11.06	11.36	9.56	11.88	7.60	10.84	10.53	12.59	10.35
CCNDBP1	LOC100506548	0	0	0	0	0	0.000	12.79	0.00	10.52	0.00	10.01	0.00	10.76	0.00	11.19	0.00
DCTN4	LOC100506548	0	0	0	0	0	0.000	11.14	0.00	11.29	0.00	10.77	0.00	11.05	0.00	12.07	0.00
FBXW7	LOC100506548	0	0	0	0	0	0.000	10.19	0.00	12.61	0.00	9.80	0.00	9.93	0.00	10.98	0.00
H2AFY	LOC100506548	0	0	0	0	0	0.000	13.38	0.00	11.42	0.00	11.16	0.00	12.68	0.00	11.90	0.00
GJB1	LOC729683	0	0	0	0	0	0.000	3.11	0.00	7.86	0.00	13.76	0.00	2.71	0.00	1.73	0.00
GJB1	LPAR2	101	244	59	92	47	0.000	3.11	13.25	7.86	7.45	13.76	7.66	2.71	9.90	1.73	6.05
FAM53C	LRRC20	64	951	601	383	400	0.000	13.24	7.73	11.22	11.29	9.83	11.03	10.54	7.75	11.79	13.05
CYBRD1	LRRC40	780	277	558	590	702	0.229	10.73	8.27	10.79	8.81	9.89	9.51	13.57	8.28	11.05	9.03
BUB3	LRRFIP1	647	852	958	811	370	0.000	11.10	12.63	10.26	11.34	11.07	11.86	11.01	13.01	10.86	12.80
LIMA1	LRRFIP1	588	196	859	848	792	0.248	8.49	12.63	9.48	11.34	9.96	11.86	12.67	13.01	10.69	12.80
FYTTD1	LRRFIP2	486	889	773	992	927	0.309	10.45	11.17	10.47	10.83	10.86	11.24	11.14	11.04	12.68	12.59
EXOSC10	LRRK2	43	693	601	548	869	0.567	10.95	12.74	11.37	9.75	10.51	8.75	11.30	12.48	11.21	9.89
FAM69B	LTB	627	535	347	278	367	0.000	7.85	12.40	9.56	3.61	7.88	6.30	8.22	6.57	7.62	3.95
ASPH	LUC7L3	607	540	83	317	612	0.150	11.49	11.57	11.91	13.58	11.52	12.93	12.16	13.82	12.14	13.05
AZI2	LUC7L3	871	614	34	501	650	0.168	9.80	11.57	9.14	13.58	8.68	12.93	9.39	13.82	9.56	13.05
BCAS2	LUC7L3	919	632	268	100	778	0.351	9.60	11.57	10.38	13.58	9.89	12.93	9.11	13.82	10.37	13.05
BLOC1S6	LUC7L3	991	732	124	723	784	0.199	10.30	11.57	10.98	13.58	10.81	12.93	10.72	13.82	10.74	13.05
BNIP3L	LUC7L3	518	791	334	767	891	0.494	12.91	11.57	11.99	13.58	10.64	12.93	12.19	13.82	11.02	13.05
DNTTIP2	LUC7L3	922	782	95	308	683	0.183	10.93	11.57	10.13	13.58	10.18	12.93	10.79	13.82	11.66	13.05
AKIP1	LYSMD3	595	740	793	867	757	0.089	8.47	9.46	9.07	7.82	8.52	10.44	8.65	9.43	9.48	9.97
GPD2	MAF	803	641	255	790	540	0.020	10.15	10.05	10.51	9.82	8.40	11.87	10.24	11.77	11.19	11.72
ASB10	MAF1	101	108	96	50	463	0.000	1.72	12.51	0.21	11.38	0.60	11.11	0.28	11.77	10.74	13.29
JAG1	MAGEH1	693	226	681	523	907	0.616	8.20	8.10	9.19	10.79	9.31	8.89	12.08	9.47	10.40	8.46
LGALS3	MAGEH1	426	14	483	827	981	0.798	12.33	8.10	10.38	10.79	8.29	8.89	13.20	9.47	10.66	8.46
ELOVL5	MAN1A1	953	236	675	720	944	0.469	12.27	11.60	11.15	8.42	12.33	13.54	12.34	12.14	9.27	9.85
JAG1	MAN1A1	943	579	211	651	939	0.543	8.20	11.60	9.19	8.42	9.31	13.54	12.08	12.14	10.40	9.85
LGALS3	MAN1A1	220	154	236	776	909	0.680	12.33	11.60	10.38	8.42	8.29	13.54	13.20	12.14	10.66	9.85
LIMA1	MAN1A1	426	41	560	753	597	0.116	8.49	11.60	9.48	8.42	9.96	13.54	12.67	12.14	10.69	9.85
C21orf33	MAP2K6	474	754	85	907	440	0.000	11.06	10.38	11.96	5.53	13.57	6.68	11.08	5.17	12.80	10.25
CAMK2B	MAP4	314	20	10	355	703	0.406	5.38	11.38	14.04	15.05	9.15	12.82	3.76	14.21	12.91	15.59
FOXN3	MAP4	806	270	648	814	899	0.414	11.88	11.38	10.40	15.05	11.47	12.82	11.86	14.21	13.13	15.59
KPNA1	MAP4	531	266	968	931	910	0.395	11.33	11.38	10.72	15.05	10.87	12.82	10.73	14.21	12.74	15.59
DBT	MAPK1IP1L	845	928	235	677	742	0.153	8.72	11.40	9.65	10.69	11.34	11.13	9.25	11.67	10.85	11.29
CAPN3	MAPKAP1	755	25	7	838	304	0.000	10.90	11.03	10.87	11.82	11.03	11.34	10.84	11.17	14.61	12.22
EIF4B	MCL1	530	305	516	755	964	0.777	13.00	15.36	12.27	11.98	12.64	14.14	13.41	15.43	14.46	13.60
BAIAP2-AS1	MDGA1	85	419	356	475	857	0.714	9.19	7.99	11.71	9.69	9.16	6.19	9.67	8.42	6.66	7.07
GLTPD1	MDH1	812	925	709	953	920	0.160	10.44	10.88	10.35	14.16	11.77	12.44	9.22	11.27	10.53	13.37
CTDSP2	MDN1	308	780	749	918	755	0.131	13.07	9.98	12.48	11.79	12.81	12.26	14.11	11.33	12.96	11.90
ANAPC16	MED14	869	548	852	849	882	0.205	11.73	10.61	10.38	10.19	11.96	10.71	11.58	10.72	12.64	12.07
BAIAP2-AS1	MEX3A	0	67	676	156	646	0.000	9.19	3.60	11.71	5.20	9.16	7.30	9.67	5.00	6.66	3.75
IPO5	MFSD11	699	968	970	829	896	0.132	10.70	9.98	12.56	8.40	12.00	9.43	12.36	9.32	13.73	9.98
LRWD1	MFSD4	359	868	143	195	166	0.000	11.18	6.29	9.46	12.09	9.41	6.02	8.82	8.80	9.40	6.29
COL1A1	MGLL	324	74	380	112	851	0.702	8.40	10.15	6.87	14.04	11.90	13.53	14.71	13.03	10.66	11.99
JAG1	MGLL	317	345	221	367	917	0.834	8.20	10.15	9.19	14.04	9.31	13.53	12.08	13.03	10.40	11.99
CD248	MGST1	226	498	473	122	227	0.000	7.61	10.34	6.40	10.59	7.42	14.97	10.89	11.93	9.61	8.75
CIDEC	MGST1	189	68	464	82	727	0.454	4.83	10.34	2.53	10.59	5.94	14.97	1.96	11.93	6.74	8.75
MACF1	MICU1	690	478	374	420	915	0.735	12.54	11.89	14.53	11.75	13.06	11.68	15.82	10.82	12.99	11.83
ADAM10	MIR568	0	652	234	560	557	0.000	11.89	1.01	10.30	1.40	10.77	2.42	11.48	1.64	10.18	3.62
ATF2	MITF	834	522	823	968	860	0.201	10.21	7.55	10.69	6.85	10.69	7.32	10.45	9.51	10.28	12.27
KIAA0947	MITF	820	648	783	719	995	0.505	9.91	7.55	10.70	6.85	10.24	7.32	10.43	9.51	11.60	12.27
DCAF16	MKRN1	159	901	926	942	940	0.246	9.47	13.65	9.30	11.64	8.80	11.33	9.92	11.91	9.85	12.11
DUSP3	MLXIP	685	852	707	892	814	0.118	11.16	12.88	12.56	11.26	12.78	12.22	12.40	12.95	13.85	14.41
F8A1	MLXIP	804	531	89	327	397	0.000	10.03	12.88	8.17	11.26	9.05	12.22	7.08	12.95	8.48	14.41
BAIAP2-AS1	MMP14	435	21	749	428	874	0.624	9.19	8.77	11.71	7.38	9.16	10.08	9.67	13.55	6.66	10.50
ARHGEF6	MPC2	839	324	612	594	643	0.112	11.94	9.96	10.49	10.96	8.77	12.34	11.28	9.22	11.80	11.48
GLTPD1	MPC2	771	898	643	915	794	0.087	10.44	9.96	10.35	10.96	11.77	12.34	9.22	9.22	10.53	11.48
ADAM10	MPHOSPH8	967	849	938	913	996	0.159	11.89	11.16	10.30	11.70	10.77	10.87	11.48	11.51	10.18	10.95
BCAS2	MPHOSPH8	917	901	910	796	718	0.000	9.60	11.16	10.38	11.70	9.89	10.87	9.11	11.51	10.37	10.95
MAPK1IP1L	MPHOSPH8	751	766	905	785	888	0.181	11.40	11.16	10.69	11.70	11.13	10.87	11.67	11.51	11.29	10.95
ASB10	MRPL11	101	108	96	50	892	0.784	1.72	9.70	0.21	8.71	0.60	10.21	0.28	8.98	10.74	10.39
CELF2	MSH6	898	653	715	848	967	0.377	13.59	10.03	12.90	9.65	8.49	10.51	12.77	10.34	11.43	10.11
APIP	MSRB3	840	518	331	590	942	0.660	8.65	8.88	8.44	9.54	8.98	8.06	9.07	11.84	10.03	12.10
CMAS	MSRB3	845	186	271	722	866	0.449	9.73	8.88	11.38	9.54	11.12	8.06	9.53	11.84	10.86	12.10
MRPL42	MSRB3	664	653	416	665	837	0.433	9.04	8.88	7.99	9.54	9.79	8.06	9.21	11.84	9.67	12.10
KIAA0391	MTFR1L	984	902	238	835	946	0.300	10.32	10.55	8.97	11.68	9.67	11.89	9.33	10.51	9.70	12.28
MRPS27	MTRF1L	682	883	972	768	963	0.278	10.50	9.73	11.01	9.50	11.45	9.41	10.46	9.40	11.82	10.50
MARCKSL1	MYD88	161	308	789	305	943	0.742	10.75	13.89	13.13	7.60	10.07	11.86	10.43	11.56	8.49	8.31
ADAR	MYLK	667	353	727	709	821	0.341	14.06	8.93	13.41	10.94	13.21	12.33	13.65	14.04	11.51	9.98
KIAA0907	MYO5A	972	616	421	767	849	0.332	10.82	11.30	11.02	13.52	11.35	8.39	11.89	10.50	11.47	10.41
LUC7L3	MYO5A	950	601	445	655	861	0.413	11.57	11.30	13.58	13.52	12.93	8.39	13.82	10.50	13.05	10.41
CD99L2	MYOZ3	331	990	75	585	1	0.000	10.94	4.58	13.69	6.26	12.11	3.56	11.39	4.85	13.52	11.64
KANSL3	MYOZ3	298	739	327	677	154	0.000	11.22	4.58	11.52	6.26	11.48	3.56	11.99	4.85	12.50	11.64
MITF	MZT1	762	382	841	761	837	0.244	7.55	8.17	6.85	9.70	7.32	7.65	9.51	8.04	12.27	9.65
KIAA1715	NAA16	817	680	802	850	944	0.314	10.16	9.43	9.94	8.47	10.12	9.18	9.48	9.52	11.10	10.18
MIR568	NAA50	101	411	333	481	505	0.010	1.01	11.37	1.40	10.86	2.42	11.76	1.64	11.65	3.62	13.45
ASPH	NCOA7	702	363	741	805	524	0.012	11.49	10.06	11.91	11.02	11.52	10.68	12.16	11.28	12.14	9.33
DAB2	NCOA7	634	511	547	618	934	0.713	10.19	10.06	7.96	11.02	9.53	10.68	12.96	11.28	10.09	9.33
MYLK	NCOA7	475	154	59	291	533	0.066	8.93	10.06	10.94	11.02	12.33	10.68	14.04	11.28	9.98	9.33
MLX	NCOR2	375	902	957	848	901	0.227	11.83	11.88	9.40	13.21	11.13	11.83	10.65	13.62	11.53	13.40
KIAA1143	NDEL1	758	862	340	663	845	0.307	9.88	12.82	9.75	11.55	9.00	11.26	9.45	11.58	11.04	11.16
IGFBP4	NDRG1	668	226	361	533	935	0.769	9.15	13.11	10.00	13.49	15.82	12.35	14.91	14.20	12.06	11.49
MAPKAP1	NDRG2	462	394	96	406	960	0.920	11.03	8.85	11.82	16.77	11.34	13.94	11.17	12.41	12.22	15.25
EPAS1	NDUFA10	418	73	762	483	629	0.194	9.57	11.21	12.89	12.53	13.73	12.30	17.49	11.36	12.61	12.73
G3BP2	NEAT1	898	132	295	534	175	0.000	11.47	15.00	12.16	13.71	11.39	16.15	11.77	17.96	13.02	15.67
GNS	NET1	287	528	116	685	937	0.767	13.48	8.63	10.62	10.09	11.77	11.30	13.23	10.41	11.76	10.90
CLN3	NEURL1	0	0	0	0	0	0.000	11.92	0.00	8.78	0.00	10.82	0.00	10.77	0.00	9.67	0.00
DNM2	NEURL1	0	0	0	0	0	0.000	13.83	0.00	11.67	0.00	12.27	0.00	13.44	0.00	12.72	0.00
DVL3	NEURL1	0	0	0	0	0	0.000	11.90	0.00	11.91	0.00	11.76	0.00	12.62	0.00	12.16	0.00
FLII	NEURL1	0	0	0	0	0	0.000	13.51	0.00	11.75	0.00	12.14	0.00	13.30	0.00	14.49	0.00
MLXIP	NFE2L1	734	889	249	841	995	0.508	12.88	11.76	11.26	13.30	12.22	13.31	12.95	13.31	14.41	15.75
ATF2	NFIA	721	263	606	967	910	0.452	10.21	8.50	10.69	10.81	10.69	11.69	10.45	10.64	10.28	10.88
DENR	NFIA	752	57	345	665	943	0.677	10.08	8.50	10.55	10.81	10.55	11.69	9.97	10.64	11.15	10.88
FAM208B	NFIA	704	345	135	627	531	0.031	9.55	8.50	10.43	10.81	10.83	11.69	11.08	10.64	11.29	10.88
MAPK1	NFIA	809	151	289	844	786	0.286	13.13	8.50	13.16	10.81	11.83	11.69	12.58	10.64	12.31	10.88
C2CD2	NGFRAP1	524	519	697	746	917	0.591	8.35	9.40	10.60	13.55	9.97	10.40	10.04	11.33	8.76	8.41
COL1A1	NGFRAP1	252	59	677	301	940	0.791	8.40	9.40	6.87	13.55	11.90	10.40	14.71	11.33	10.66	8.41
FYN	NGFRAP1	380	571	904	618	916	0.535	12.27	9.40	12.80	13.55	10.11	10.40	12.30	11.33	9.58	8.41
DST	NGLY1	420	671	571	494	587	0.095	8.25	10.96	14.78	9.28	13.41	10.34	14.55	9.53	14.21	11.45
CCDC64	NHSL1	371	9	9	662	566	0.099	9.27	6.58	11.28	8.82	8.18	11.21	8.31	9.67	4.95	6.75
LPAR2	NHSL1	438	102	92	319	813	0.626	13.25	6.58	7.45	8.82	7.66	11.21	9.90	9.67	6.05	6.75
BEST1	NIPSNAP1	702	50	43	336	354	0.000	12.24	10.29	9.62	11.18	7.77	13.03	10.03	9.00	7.30	7.56
CCND2	NOTCH2	299	293	204	871	863	0.544	11.18	13.08	11.92	11.36	7.97	12.10	11.63	13.03	8.32	10.81
IFT20	NOTCH2	717	110	860	890	866	0.261	9.23	13.08	8.89	11.36	9.17	12.10	8.40	13.03	7.93	10.81
NCOA7	NOTCH2	826	8	511	644	945	0.649	10.06	13.08	11.02	11.36	10.68	12.10	11.28	13.03	9.33	10.81
FLNB	NPR1	396	545	633	795	913	0.590	10.19	5.57	11.13	5.48	12.81	8.49	12.67	11.89	10.53	9.16
LUC7L3	NPTN	857	609	456	727	901	0.456	11.57	11.43	13.58	12.58	12.93	11.00	13.82	12.25	13.05	10.74
NDRG2	NRBP1	489	49	187	509	958	0.911	8.85	12.44	16.77	11.58	13.94	11.69	12.41	11.98	15.25	12.57
EME1	NTRK3	76	98	170	50	376	0.000	5.35	4.51	2.86	11.42	3.62	6.05	3.91	8.47	4.46	7.34
CELF2	NUCB2	194	904	571	638	592	0.057	13.59	10.29	12.90	9.30	8.49	10.99	12.77	10.78	11.43	9.69
CHD2	NUCB2	681	816	583	294	845	0.400	12.44	10.29	12.00	9.30	12.11	10.99	13.17	10.78	12.39	9.69
ITGAV	NUDT4	813	429	453	886	720	0.220	8.62	11.35	11.55	12.22	10.52	11.33	12.42	11.54	11.37	12.47
LGALS3	NUMBL	121	129	551	402	943	0.861	12.33	9.31	10.38	11.56	8.29	9.60	13.20	10.31	10.66	9.30
MITF	NUP153	769	647	708	827	967	0.459	7.55	11.28	6.85	10.02	7.32	10.82	9.51	11.12	12.27	11.67
MEF2D	NUP62	921	984	661	528	978	0.412	12.07	11.09	12.46	10.10	11.00	11.01	12.54	10.56	14.09	11.12
ARHGEF2	OAF	812	3	336	509	902	0.643	13.10	9.16	12.37	10.42	9.42	14.25	13.07	9.44	10.25	9.03
NDRG2	OAZ1	67	87	262	265	959	0.918	8.85	16.43	16.77	14.44	13.94	13.82	12.41	14.50	15.25	14.33
DUSP10	OGT	326	601	360	647	261	0.000	9.50	13.09	6.60	13.32	10.66	12.94	8.03	14.26	8.98	13.30
EIF4E2	OSBPL7	22	727	313	644	441	0.000	11.13	10.33	10.81	10.56	11.31	7.72	10.40	9.98	12.07	9.68
ANKRD10	OSBPL8	971	755	727	873	968	0.275	11.48	11.83	11.54	10.33	12.09	10.18	12.48	11.52	12.90	10.71
MITF	OSER1	479	642	838	929	966	0.477	7.55	12.19	6.85	9.58	7.32	10.34	9.51	10.44	12.27	11.80
HCCS	OSGEPL1	910	711	495	792	838	0.256	9.84	7.43	8.58	7.04	9.03	7.96	8.48	6.55	10.87	8.34
CTTN	P2RX5	340	709	555	315	873	0.614	9.56	10.72	12.84	8.86	12.47	5.97	13.23	6.35	12.31	10.04
OGDH	PADI2	545	329	402	362	433	0.000	12.35	13.66	12.72	12.30	12.10	6.18	12.59	8.83	14.70	14.46
CACNB1	PAF1	693	779	297	739	945	0.534	9.26	11.75	12.23	11.08	6.11	11.22	9.65	10.83	13.45	11.47
CMBL	PAK1	48	473	430	851	890	0.605	7.17	12.86	9.51	13.45	12.25	9.49	8.09	9.97	12.16	11.42
CAP1	PAN3	743	688	353	710	995	0.669	15.51	11.32	12.28	9.63	12.26	10.35	13.94	11.11	11.20	9.88
NDFIP1	PAN3	939	611	703	921	981	0.375	11.53	11.32	13.66	9.63	12.77	10.35	12.23	11.11	11.61	9.88
KAT6A	PANK2	525	536	972	557	954	0.622	12.57	11.01	10.42	10.06	10.86	9.52	12.17	9.75	11.49	9.55
CAP1	PAPD7	113	925	507	622	965	0.653	15.51	10.12	12.28	10.46	12.26	11.32	13.94	11.01	11.20	10.37
EHBP1L1	PARD3	401	428	933	307	777	0.415	13.54	6.98	9.83	9.15	10.32	10.60	12.71	10.86	14.37	12.11
EIF4G3	PARD3	303	9	986	732	974	0.595	11.42	6.98	12.37	9.15	10.99	10.60	11.46	10.86	12.27	12.11
ELMO2	PARD3	466	215	970	757	995	0.626	12.30	6.98	12.11	9.15	10.36	10.60	11.56	10.86	11.39	12.11
GALNT1	PARD3	447	345	973	613	953	0.623	11.13	6.98	9.73	9.15	11.14	10.60	10.74	10.86	11.35	12.11
HIVEP2	PARD3	212	4	648	740	425	0.000	10.17	6.98	11.93	9.15	9.54	10.60	10.68	10.86	11.64	12.11
MFSD11	PARD3	452	95	996	822	840	0.349	9.98	6.98	8.40	9.15	9.43	10.60	9.32	10.86	9.98	12.11
ASB10	PARP6	101	108	96	50	145	0.000	1.72	11.64	0.21	11.96	0.60	10.81	0.28	11.59	10.74	11.82
KIF1C	PARP6	860	129	351	949	987	0.570	11.02	11.64	13.37	11.96	13.19	10.81	13.58	11.59	15.45	11.82
EIF4B	PATL1	838	787	964	697	990	0.337	13.00	12.08	12.27	9.42	12.64	11.30	13.41	11.32	14.46	11.89
BAIAP2-AS1	PAX8	295	400	646	519	447	0.000	9.19	6.96	11.71	4.55	9.16	6.34	9.67	5.77	6.66	5.56
HERPUD1	PAXIP1-AS1	863	649	133	809	823	0.256	12.09	7.98	11.30	8.04	13.12	8.73	12.75	7.63	12.22	8.85
NSMCE2	PAXIP1-AS1	709	835	368	900	935	0.398	8.68	7.98	7.42	8.04	8.17	8.73	8.15	7.63	9.65	8.85
NEURL1	PBXIP1	101	108	96	50	47	0.000	0.00	13.14	0.00	12.79	0.00	11.16	0.00	12.24	0.00	13.07
OAZ1	PBXIP1	414	39	733	626	946	0.713	16.43	13.14	14.44	12.79	13.82	11.16	14.50	12.24	14.33	13.07
AFF4	PCMT1	400	731	652	592	808	0.379	11.09	11.66	11.54	12.51	12.38	11.04	12.58	10.66	12.39	12.86
CHD2	PCMT1	187	646	851	313	683	0.202	12.44	11.66	12.00	12.51	12.11	11.04	13.17	10.66	12.39	12.86
DLG5	PCMT1	11	829	859	548	826	0.302	8.43	11.66	9.96	12.51	8.84	11.04	9.99	10.66	11.51	12.86
NFIA	PCMT1	741	8	127	694	576	0.076	8.50	11.66	10.81	12.51	11.69	11.04	10.64	10.66	10.88	12.86
PBXIP1	PDAP1	818	82	485	430	965	0.771	13.14	11.61	12.79	11.53	11.16	11.49	12.24	11.56	13.07	12.80
ENSA	PDE7A	854	816	799	619	766	0.073	12.38	11.40	13.42	9.13	12.29	8.66	12.68	10.77	13.20	12.02
LSM12	PDE7A	857	845	201	338	722	0.222	8.90	11.40	6.22	9.13	7.69	8.66	6.66	10.77	8.42	12.02
HSDL2	PDK1	268	446	195	479	934	0.868	11.41	10.83	10.71	7.87	12.79	9.72	10.38	8.89	12.91	9.71
FAM172A	PECAM1	0	0	0	0	0	0.000	9.69	0.00	9.69	0.00	8.45	0.00	9.23	0.00	8.45	0.00
ITSN1	PEX19	577	972	705	968	978	0.345	9.26	11.11	12.37	11.75	11.69	12.23	10.58	10.99	10.89	11.92
CHD2	PGK1	276	744	895	498	675	0.175	12.44	14.92	12.00	13.85	12.11	13.20	13.17	13.72	12.39	14.25
MYOZ3	PGK1	221	945	28	91	210	0.000	4.58	14.92	6.26	13.85	3.56	13.20	4.85	13.72	11.64	14.25
NDRG2	PGK1	111	11	9	25	910	0.820	8.85	14.92	16.77	13.85	13.94	13.20	12.41	13.72	15.25	14.25
LAMC1	PGRMC1	605	448	692	870	942	0.550	8.97	10.35	9.52	12.04	10.85	13.83	14.22	11.60	13.10	9.43
ARL8B	PHF10	732	699	953	816	858	0.164	11.52	9.49	12.09	8.72	11.22	9.92	11.90	9.89	12.57	10.36
MAN1A1	PHF11	765	254	343	729	912	0.577	11.60	11.22	8.42	9.05	13.54	10.05	12.14	10.46	9.85	9.22
MMP28	PHF19	459	396	587	316	707	0.370	6.39	11.16	9.10	9.79	4.02	8.18	9.83	10.18	7.40	9.45
HPRT1	PHIP	935	501	841	570	938	0.453	9.75	11.02	11.07	10.34	9.30	10.06	8.69	11.55	9.56	11.33
C6orf106	PHTF2	701	732	682	699	779	0.151	12.16	9.67	13.04	9.01	13.10	8.63	12.59	9.48	14.15	12.51
DCAF6	PHTF2	542	865	843	916	969	0.355	11.06	9.67	12.16	9.01	12.31	8.63	10.99	9.48	14.90	12.51
PARD3	PHTF2	145	118	947	685	566	0.066	6.98	9.67	9.15	9.01	10.60	8.63	10.86	9.48	12.11	12.51
LRRK1	PI16	287	12	511	247	352	0.000	10.23	7.71	9.53	7.66	7.02	4.05	9.47	7.42	7.89	8.22
LEF1	PICK1	297	149	563	228	403	0.000	10.52	10.22	7.93	11.11	4.32	10.25	7.56	10.03	3.91	10.53
BEST1	PIGR	128	146	370	39	114	0.000	12.24	5.64	9.62	2.12	7.77	10.97	10.03	11.61	7.30	4.02
EPHB2	PIGR	139	258	682	518	110	0.000	7.46	5.64	8.65	2.12	4.99	10.97	7.18	11.61	5.23	4.02
HIPK3	PIP4K2B	815	359	448	513	763	0.388	11.85	10.93	10.42	14.01	11.70	11.04	12.50	11.64	13.07	12.85
CYBRD1	PITPNB	735	52	380	486	784	0.451	10.73	10.56	10.79	11.29	9.89	11.83	13.57	11.32	11.05	10.52
MYLK	PITPNB	580	282	346	658	523	0.023	8.93	10.56	10.94	11.29	12.33	11.83	14.04	11.32	9.98	10.52
LUC7L3	PJA2	938	669	452	797	876	0.331	11.57	12.32	13.58	13.30	12.93	12.18	13.82	12.48	13.05	12.05
ADCK3	PLEC	813	755	846	819	827	0.047	11.12	13.80	10.84	14.52	12.86	13.51	10.46	14.79	15.54	15.37
GUSB	PLEKHA2	869	241	750	764	942	0.443	11.74	11.70	9.61	9.72	12.29	9.00	11.43	10.89	9.89	8.68
CAMK2B	PLIN3	50	2	5	169	175	0.000	5.38	12.37	14.04	8.66	9.15	9.53	3.76	10.01	12.91	11.92
KIAA1715	PLP2	745	76	525	924	732	0.220	10.16	13.24	9.94	5.88	10.12	8.30	9.48	11.00	11.10	10.35
MYADM	PLXNB2	459	360	640	673	667	0.180	13.40	12.13	9.66	12.11	9.98	13.83	12.69	14.04	9.85	10.53
BCAS2	PNISR	869	722	344	212	805	0.346	9.60	11.95	10.38	13.05	9.89	12.89	9.11	13.70	10.37	13.12
BLOC1S6	PNISR	998	839	129	739	710	0.105	10.30	11.95	10.98	13.05	10.81	12.89	10.72	13.70	10.74	13.12
MYO5A	PNISR	989	712	547	714	841	0.275	11.30	11.95	13.52	13.05	8.39	12.89	10.50	13.70	10.41	13.12
LRRK2	PNN	627	437	622	428	812	0.499	12.74	11.67	9.75	11.95	8.75	13.33	12.48	12.83	9.89	12.22
ASB10	POLR2I	101	108	96	50	844	0.688	1.72	8.74	0.21	9.90	0.60	9.25	0.28	8.05	10.74	10.40
ACOT7	POU2F2	480	590	638	313	509	0.009	8.95	11.56	12.56	8.06	9.34	6.74	9.09	7.94	7.77	5.80
GJB1	POU2F2	101	267	142	236	47	0.000	3.11	11.56	7.86	8.06	13.76	6.74	2.71	7.94	1.73	5.80
NHSL1	POU2F2	697	67	360	363	819	0.539	6.58	11.56	8.82	8.06	11.21	6.74	9.67	7.94	6.75	5.80
ASB10	PP7080	0	0	0	0	0	0.000	1.72	0.00	0.21	0.00	0.60	0.00	0.28	0.00	10.74	0.00
PBX1	PPFIA1	46	581	350	739	790	0.420	8.95	11.07	11.46	10.91	8.71	10.72	11.33	11.26	12.18	11.34
COL6A1	PPIB	396	503	145	580	784	0.526	8.83	11.90	12.83	9.64	13.28	12.54	15.30	12.17	12.76	9.29
EPAS1	PPIF	389	574	425	80	788	0.539	9.57	11.55	12.89	10.93	13.73	12.98	17.49	10.44	12.61	11.90
ME3	PPIF	643	670	396	511	296	0.000	7.31	11.55	10.67	10.93	8.61	12.98	9.53	10.44	9.78	11.90
PFN2	PPM1B	574	599	688	607	235	0.000	7.21	10.90	13.80	11.33	9.22	11.18	9.59	10.85	13.19	12.97
MIR568	PPP1R12A	101	421	475	848	670	0.255	1.01	11.64	1.40	10.77	2.42	10.18	1.64	11.85	3.62	11.27
NFIA	PPP1R12A	751	337	547	959	935	0.503	8.50	11.64	10.81	10.77	11.69	10.18	10.64	11.85	10.88	11.27
LSM12	PPP1R12B	622	781	258	92	654	0.170	8.90	11.27	6.22	11.83	7.69	10.90	6.66	12.54	8.42	13.77
LRRK2	PPP1R8	895	884	378	852	506	0.003	12.74	10.10	9.75	9.72	8.75	9.55	12.48	9.40	9.89	10.06
GOLGA4	PPP2R5C	963	859	958	892	780	0.000	10.15	12.50	11.48	12.32	12.65	11.50	12.11	12.21	13.76	11.70
CSPP1	PPP3CA	747	837	884	833	195	0.000	8.03	11.24	8.72	13.47	9.25	9.66	9.30	10.55	10.27	11.33
LUC7L3	PPP3CA	927	611	815	671	845	0.219	11.57	11.24	13.58	13.47	12.93	9.66	13.82	10.55	13.05	11.33
HSDL2	PPP3CC	15	269	625	723	664	0.183	11.41	9.98	10.71	8.56	12.79	8.59	10.38	9.74	12.91	11.71
FMR1	PQLC3	924	752	779	955	985	0.265	10.61	9.84	11.23	6.86	11.53	8.27	10.91	9.25	9.82	8.53
NAB1	PQLC3	972	760	830	938	969	0.190	9.71	9.84	10.14	6.86	10.66	8.27	10.45	9.25	9.11	8.53
PALLD	PREPL	767	41	746	663	440	0.000	8.69	8.84	11.00	13.14	10.51	10.40	13.81	10.65	13.70	11.35
IFNGR2	PRKACB	176	920	713	452	601	0.101	12.94	10.35	9.98	13.28	10.21	9.68	11.01	9.36	9.78	9.07
AMOTL1	PRKAR1A	391	909	719	871	915	0.331	7.62	12.75	9.61	13.23	10.59	12.95	11.84	13.58	14.12	14.09
LRRK2	PRKD3	684	500	671	248	449	0.000	12.74	10.20	9.75	8.60	8.75	9.61	12.48	10.81	9.89	10.94
BNIP3L	PRRC2C	233	963	953	860	952	0.272	12.91	12.26	11.99	12.28	10.64	12.12	12.19	13.26	11.02	12.24
MAP4	PRUNE	312	234	537	819	931	0.684	11.38	10.30	15.05	9.01	12.82	9.64	14.21	9.18	15.59	10.82
NEAT1	PRUNE	302	275	539	834	503	0.003	15.00	10.30	13.71	9.01	16.15	9.64	17.96	9.18	15.67	10.82
PBXIP1	PSMC3	659	102	417	362	943	0.806	13.14	11.03	12.79	12.11	11.16	11.93	12.24	11.65	13.07	13.01
DST	PSMD1	301	548	173	138	541	0.061	8.25	11.26	14.78	12.07	13.41	11.57	14.55	11.53	14.21	13.23
LRRFIP2	PSMD1	975	753	682	778	857	0.179	11.17	11.26	10.83	12.07	11.24	11.57	11.04	11.53	12.59	13.23
MITF	PSMD11	778	711	731	652	980	0.524	7.55	11.11	6.85	11.21	7.32	11.64	9.51	11.56	12.27	12.91
IL13RA1	PSPC1	801	168	857	948	884	0.247	12.26	10.78	8.64	10.22	12.92	9.43	12.22	9.82	11.50	10.92
LYRM1	PTCD3	271	903	956	992	990	0.305	10.59	10.27	9.56	11.40	11.07	11.70	9.10	11.10	10.23	12.20
DAB2	PTPLAD1	688	547	754	647	927	0.536	10.19	9.08	7.96	12.26	9.53	11.86	12.96	10.45	10.09	8.99
PDE4DIP	PTPN11	858	779	680	856	304	0.000	10.56	10.32	13.90	13.09	12.52	12.08	13.01	12.23	16.50	13.16
BAIAP2-AS1	PVRL1	907	963	947	743	851	0.054	9.19	9.18	11.71	12.35	9.16	9.04	9.67	8.24	6.66	7.39
CLK4	PWP1	517	833	232	836	868	0.393	10.49	10.17	10.50	10.21	10.48	10.13	10.21	10.02	11.09	10.24
NEAT1	PWP1	514	283	549	778	874	0.578	15.00	10.17	13.71	10.21	16.15	10.13	17.96	10.02	15.67	10.24
DBT	PXK	754	455	303	523	864	0.590	8.72	11.81	9.65	11.25	11.34	9.30	9.25	10.17	10.85	10.07
LRRC40	PXK	810	421	625	689	884	0.456	8.27	11.81	8.81	11.25	9.51	9.30	8.28	10.17	9.03	10.07
CAMK2B	PXN	74	66	218	327	540	0.080	5.38	14.04	14.04	10.25	9.15	11.00	3.76	13.14	12.91	13.27
ACADSB	QKI	943	471	274	592	821	0.435	8.48	12.08	10.49	14.05	14.23	11.86	9.76	13.15	11.81	13.87
DNAJA4	QKI	130	188	612	434	769	0.482	10.69	12.08	12.11	14.05	7.50	11.86	10.03	13.15	11.99	13.87
ANKRD10	RAB11A	854	700	530	535	913	0.516	11.48	11.62	11.54	11.81	12.09	11.19	12.48	12.34	12.90	11.51
KIAA0907	RAB11A	627	831	359	624	966	0.641	10.82	11.62	11.02	11.81	11.35	11.19	11.89	12.34	11.47	11.51
MAFF	RAB15	297	23	267	198	143	0.000	10.33	8.48	8.34	12.97	9.34	10.80	11.63	9.67	11.37	9.33
IGFBP4	RAB8B	121	529	459	594	357	0.000	9.15	12.41	10.00	9.45	15.82	9.37	14.91	11.64	12.06	9.39
KANSL3	RABEP1	934	978	923	963	1000	0.101	11.22	10.48	11.52	12.16	11.48	11.00	11.99	10.98	12.50	12.49
MYOZ3	RABEP1	343	851	97	488	89	0.000	4.58	10.48	6.26	12.16	3.56	11.00	4.85	10.98	11.64	12.49
NFIA	RAC1	709	344	463	819	624	0.124	8.50	12.64	10.81	13.25	11.69	12.45	10.64	13.29	10.88	12.94
MFSD4	RASAL3	632	53	792	535	703	0.221	6.29	12.67	12.09	5.48	6.02	8.42	8.80	10.21	6.29	6.61
PCMT1	RASGRP3	210	134	780	602	21	0.000	11.66	8.15	12.51	7.96	11.04	7.95	10.66	8.78	12.86	9.70
CAMK2G	RBM38	55	242	393	734	720	0.330	12.20	13.58	13.75	9.15	10.30	9.63	11.04	9.99	12.36	12.97
FHL3	RBM38	141	355	840	748	712	0.212	11.56	13.58	8.18	9.15	7.96	9.63	9.51	9.99	15.11	12.97
MAN2A2	RBM38	41	455	563	753	643	0.183	13.09	13.58	12.51	9.15	12.37	9.63	12.39	9.99	12.95	12.97
PNPLA6	RBM38	84	430	689	621	749	0.343	12.95	13.58	12.39	9.15	11.40	9.63	12.66	9.99	11.66	12.97
ASB10	RBM42	101	108	96	50	359	0.000	1.72	11.60	0.21	10.55	0.60	10.97	0.28	10.93	10.74	11.30
CAMK2B	RBM42	131	580	126	202	756	0.472	5.38	11.60	14.04	10.55	9.15	10.97	3.76	10.93	12.91	11.30
FAM115A	RBMS1	426	731	555	820	782	0.280	7.93	12.12	11.91	8.75	11.27	10.14	10.76	12.67	10.67	10.49
NDEL1	RBMX	371	819	540	936	986	0.575	12.82	11.88	11.55	11.61	11.26	11.86	11.58	12.74	11.16	12.67
EBPL	RBPJ	925	437	385	617	964	0.657	9.18	12.71	7.55	11.32	11.14	10.83	8.89	12.54	7.77	11.51
HPRT1	RBPJ	832	391	751	839	965	0.469	9.75	12.71	11.07	11.32	9.30	10.83	8.69	12.54	9.56	11.51
LEF1	RCOR2	0	60	625	553	82	0.000	10.52	3.21	7.93	8.52	4.32	3.26	7.56	3.26	3.91	5.84
ATP2B4	RDH11	772	976	512	704	969	0.460	12.47	10.36	12.63	11.31	11.68	12.37	13.52	10.99	10.86	8.97
JAG1	RDH11	781	568	116	431	971	0.767	8.20	10.36	9.19	11.31	9.31	12.37	12.08	10.99	10.40	8.97
LAMC1	RDH11	523	691	787	844	964	0.505	8.97	10.36	9.52	11.31	10.85	12.37	14.22	10.99	13.10	8.97
NOTCH2	RDH11	724	444	922	820	932	0.381	13.08	10.36	11.36	11.31	12.10	12.37	13.03	10.99	10.81	8.97
PDE4DIP	RDX	850	656	874	840	798	0.071	10.56	9.08	13.90	11.16	12.52	11.96	13.01	11.71	16.50	12.71
KIF3C	RECQL5	735	651	368	769	838	0.348	10.05	10.38	13.82	10.19	6.07	10.67	7.53	9.55	7.74	9.23
KIF5B	REEP5	951	135	974	986	984	0.264	11.40	11.64	13.43	13.40	11.47	12.52	12.93	12.36	13.09	12.52
ARHGEF12	RELL1	33	546	816	929	773	0.250	10.51	8.76	12.92	5.04	13.16	5.60	13.32	6.87	12.74	7.43
KCTD6	RELL1	635	369	195	456	580	0.120	8.26	8.76	9.55	5.04	9.11	5.60	7.59	6.87	8.36	7.43
CMC1	RGCC	585	204	596	635	599	0.058	9.13	10.03	7.66	11.05	9.42	6.41	8.27	14.29	9.06	9.75
MAN1A1	RGL1	625	704	590	661	926	0.562	11.60	9.07	8.42	11.58	13.54	8.96	12.14	11.26	9.85	8.44
NAB1	RGL1	597	792	695	891	952	0.416	9.71	9.07	10.14	11.58	10.66	8.96	10.45	11.26	9.11	8.44
MYOZ3	RHOA	239	256	52	288	12	0.000	4.58	15.07	6.26	13.29	3.56	13.09	4.85	15.01	11.64	13.69
ACADSB	RHOQ	947	599	4	236	929	0.594	8.48	10.93	10.49	10.93	14.23	9.91	9.76	11.66	11.81	12.70
ATP5H	RILP	221	867	887	934	980	0.366	10.99	10.87	11.77	8.44	11.93	10.35	11.03	9.09	12.93	10.71
CMC2	RILP	274	762	843	425	758	0.258	8.88	10.87	10.09	8.44	9.61	10.35	8.51	9.09	9.74	10.71
APEH	RILPL1	712	829	541	869	966	0.457	11.53	8.28	11.27	9.19	11.97	7.50	10.92	7.88	12.44	10.93
NECAB3	RILPL1	224	885	904	791	946	0.352	8.87	8.28	11.28	9.19	10.03	7.50	9.85	7.88	11.45	10.93
DDX10	RIN2	629	21	756	520	916	0.629	8.85	9.12	9.39	9.84	8.93	8.99	8.89	11.68	9.48	9.83
CLCC1	RMND5A	644	836	342	984	980	0.480	8.19	11.35	8.71	11.21	9.20	11.90	8.99	10.41	10.15	12.75
GALNT2	RMND5A	725	754	39	466	784	0.329	11.49	11.35	10.54	11.21	13.07	11.90	11.43	10.41	12.23	12.75
PIP4K2B	RMND5A	871	906	850	992	834	0.000	10.93	11.35	14.01	11.21	11.04	11.90	11.64	10.41	12.85	12.75
NFIA	RNASEH1	751	115	18	355	452	0.000	8.50	8.57	10.81	7.46	11.69	8.61	10.64	8.18	10.88	9.75
AMPD3	RNF115	437	598	837	160	227	0.000	11.34	10.53	9.32	10.67	7.03	10.34	9.17	10.69	12.10	12.63
CSPP1	RNF13	661	937	748	746	774	0.084	8.03	12.18	8.72	10.75	9.25	11.09	9.30	11.45	10.27	10.74
FOXJ3	RNF13	604	931	749	901	997	0.402	10.82	12.18	11.03	10.75	10.84	11.09	11.42	11.45	12.28	10.74
LUC7L3	RNF13	860	889	219	414	862	0.363	11.57	12.18	13.58	10.75	12.93	11.09	13.82	11.45	13.05	10.74
KAT2B	RNF4	622	441	314	712	525	0.025	11.38	11.67	11.46	11.03	10.96	10.76	10.49	11.14	11.94	10.88
HSP90AA1	RNPC3	184	660	399	105	444	0.000	13.89	9.27	16.67	9.74	14.76	9.16	15.56	10.07	14.68	10.76
COL1A1	RPL3	484	130	385	403	512	0.024	8.40	15.16	6.87	15.11	11.90	15.25	14.71	16.15	10.66	13.47
MAN1A1	RPL3	85	369	278	882	894	0.597	11.60	15.16	8.42	15.11	13.54	15.25	12.14	16.15	9.85	13.47
DNAJA4	RPN2	628	702	336	116	49	0.000	10.69	12.25	12.11	10.97	7.50	12.94	10.03	13.28	11.99	12.37
DST	RPN2	804	622	160	146	341	0.000	8.25	12.25	14.78	10.97	13.41	12.94	14.55	13.28	14.21	12.37
MAP2K4	RPN2	307	649	883	917	948	0.421	10.83	12.25	11.87	10.97	10.30	12.94	9.86	13.28	11.01	12.37
MFSD4	RPP25	391	929	92	20	209	0.000	6.29	7.84	12.09	8.83	6.02	7.65	8.80	8.39	6.29	6.93
BCL6	RRM1	27	391	197	340	492	0.000	15.42	9.63	11.51	9.31	12.59	9.27	13.82	9.78	14.96	11.07
RAF1	RRM1	136	930	933	905	824	0.162	13.45	9.63	11.41	9.31	12.53	9.27	12.35	9.78	13.64	11.07
ASB10	RRNAD1	101	108	96	50	245	0.000	1.72	10.23	0.21	9.04	0.60	10.62	0.28	9.64	10.74	10.09
JUP	RTN2	47	8	657	822	740	0.281	9.59	9.53	9.46	11.22	12.57	6.53	12.60	7.25	12.64	12.59
GTPBP4	RUFY1	636	771	901	871	960	0.331	9.93	11.79	9.73	9.87	10.12	10.45	10.37	10.92	11.54	10.81
FOXK2	RXRA	580	471	704	924	1000	0.646	10.58	13.70	10.94	11.98	10.44	14.06	10.81	12.01	11.85	13.83
APMAP	S100A10	528	64	619	923	258	0.000	13.88	12.81	11.98	8.13	14.10	10.84	11.96	13.67	10.81	10.29
LINC00341	S100A10	517	509	18	675	922	0.744	9.93	12.81	6.74	8.13	8.42	10.84	8.72	13.67	8.05	10.29
MAN1A1	S100A10	369	155	215	718	801	0.493	11.60	12.81	8.42	8.13	13.54	10.84	12.14	13.67	9.85	10.29
JAG1	SACM1L	958	464	521	390	791	0.426	8.20	10.78	9.19	10.61	9.31	10.75	12.08	11.01	10.40	9.99
PITPNB	SAT1	542	230	669	895	997	0.691	10.56	15.98	11.29	12.63	11.83	14.37	11.32	16.09	10.52	10.83
DNASE1L1	SATB1	674	905	640	603	824	0.278	10.51	11.25	8.00	12.04	8.61	10.50	8.93	10.63	11.43	12.13
NKTR	SCAMP1	935	631	710	762	875	0.261	11.46	9.54	12.16	11.09	12.47	9.44	13.60	9.79	12.21	10.32
CSPP1	SCARB2	875	941	781	727	844	0.090	8.03	10.85	8.72	12.56	9.25	13.36	9.30	13.76	10.27	13.40
JUP	SCN1B	84	13	658	397	796	0.513	9.59	9.24	9.46	13.24	12.57	8.10	12.60	8.34	12.64	14.07
C2orf68	SEC14L1	492	359	661	584	874	0.625	11.17	13.87	7.94	12.45	10.05	10.54	9.94	13.44	11.06	12.36
DCUN1D4	SEC14L1	420	453	96	725	841	0.570	8.93	13.87	10.70	12.45	11.59	10.54	10.45	13.44	10.59	12.36
FBXO9	SEC14L1	172	153	680	431	918	0.746	12.00	13.87	11.67	12.45	11.88	10.54	11.14	13.44	11.01	12.36
MDN1	SEC14L1	437	286	150	720	773	0.436	9.98	13.87	11.79	12.45	12.26	10.54	11.33	13.44	11.90	12.36
NFIA	SEC23A	774	149	126	766	829	0.388	8.50	10.14	10.81	10.12	11.69	12.02	10.64	10.89	10.88	11.80
ADCK3	SEC61A1	847	687	861	416	614	0.057	11.12	12.64	10.84	11.79	12.86	14.26	10.46	13.77	15.54	12.38
NIN	SEC62	950	886	912	973	914	0.015	12.69	11.97	10.71	12.67	8.96	12.74	10.90	12.38	11.10	11.53
RBM10	SELENBP1	11	95	157	702	185	0.000	11.86	12.06	11.47	10.87	11.38	13.93	11.16	12.74	11.00	11.59
MFSD4	SELPLG	87	178	104	93	573	0.146	6.29	15.22	12.09	6.72	6.02	7.52	8.80	10.82	6.29	6.63
HRAS	SEMA4D	224	456	826	727	915	0.553	9.27	13.38	11.16	12.04	9.35	8.84	9.68	10.86	10.52	12.62
BAIAP2-AS1	SEMA7A	83	865	837	20	810	0.310	9.19	9.89	11.71	11.04	9.16	6.80	9.67	8.56	6.66	7.53
ELOVL5	SEPT11	621	617	422	584	953	0.745	12.27	9.54	11.15	12.37	12.33	11.24	12.34	12.44	9.27	10.23
GUSB	SEPT11	797	462	923	744	962	0.442	11.74	9.54	9.61	12.37	12.29	11.24	11.43	12.44	9.89	10.23
IFT20	SEPT11	336	655	944	828	788	0.210	9.23	9.54	8.89	12.37	9.17	11.24	8.40	12.44	7.93	10.23
LGALS3BP	SEPT11	682	309	689	761	915	0.514	10.16	9.54	10.73	12.37	12.43	11.24	13.85	12.44	10.06	10.23
S100A11	SEPT11	15	351	918	615	970	0.673	16.03	9.54	7.40	12.37	9.71	11.24	13.47	12.44	9.69	10.23
PDE4DIP	SEPT2	860	589	853	844	739	0.075	10.56	12.29	13.90	13.39	12.52	12.56	13.01	13.85	16.50	12.75
RNF144B	SERBP1	290	647	300	756	586	0.086	11.79	12.24	7.91	11.79	9.84	12.91	11.54	12.83	11.15	13.74
CDK13	SERPINE2	524	348	779	115	118	0.000	10.86	7.32	10.75	12.58	11.18	8.07	10.95	8.87	11.03	7.91
KIDINS220	SERPING1	79	294	891	838	891	0.417	11.10	10.03	11.92	10.80	11.01	16.28	12.03	16.03	11.43	12.37
NUMBL	SERPING1	236	383	156	791	991	0.837	9.31	10.03	11.56	10.80	9.60	16.28	10.31	16.03	9.30	12.37
FECH	SERTAD2	276	875	178	442	824	0.486	10.79	10.90	9.59	8.59	10.73	10.37	8.88	10.43	11.03	9.99
LRRFIP1	SESN3	465	813	119	638	324	0.000	12.63	11.31	11.34	12.24	11.86	8.98	13.01	11.02	12.80	10.12
RAC1	SETD6	188	753	903	870	997	0.481	12.64	8.11	13.25	8.08	12.45	9.05	13.29	8.17	12.94	9.81
CCDC42B	SEZ6L2	207	566	81	36	47	0.000	3.12	4.22	2.81	12.95	2.78	4.91	4.53	7.12	1.23	6.07
LEF1	SEZ6L2	136	31	704	28	531	0.046	10.52	4.22	7.93	12.95	4.32	4.91	7.56	7.12	3.91	6.07
LILRB3	SEZ6L2	141	32	549	205	126	0.000	12.42	4.22	2.23	12.95	5.95	4.91	7.77	7.12	4.65	6.07
RUNX3	SEZ6L2	157	23	427	23	562	0.124	12.38	4.22	4.53	12.95	7.66	4.91	9.50	7.12	5.70	6.07
RUNX3	SFXN5	2	527	295	144	530	0.046	12.38	11.06	4.53	13.53	7.66	12.51	9.50	8.90	5.70	9.71
NR3C2	SGPL1	680	585	790	735	353	0.000	7.55	10.67	9.89	10.33	9.11	11.66	8.91	10.50	9.68	9.94
NR3C2	SH3GLB1	40	727	117	642	316	0.000	7.55	13.20	9.89	11.02	9.11	11.12	8.91	12.52	9.68	13.55
LUC7L3	SHOC2	908	668	496	436	821	0.398	11.57	11.45	13.58	10.24	12.93	10.19	13.82	10.30	13.05	10.94
ICA1	SIGLEC7	509	51	404	702	447	0.000	8.47	10.43	10.46	1.25	8.31	6.66	9.19	5.82	7.61	2.71
MITF	SKP1	694	546	861	871	792	0.172	7.55	12.48	6.85	14.06	7.32	12.62	9.51	13.07	12.27	13.82
NPHP3	SLBP	937	426	497	721	934	0.540	9.42	10.85	9.81	10.36	11.12	10.01	10.92	10.14	10.19	9.79
ACTR3B	SLC15A4	695	533	855	958	830	0.216	8.08	12.50	10.67	9.05	8.74	10.42	7.19	10.02	9.22	11.54
PFN2	SLC15A4	406	654	273	789	555	0.055	7.21	12.50	13.80	9.05	9.22	10.42	9.59	10.02	13.19	11.54
ATP5SL	SLC16A1	473	129	829	401	840	0.515	10.68	8.81	10.44	10.03	10.56	11.45	10.55	8.50	11.19	11.56
C21orf33	SLC16A1	554	262	755	409	965	0.775	11.06	8.81	11.96	10.03	13.57	11.45	11.08	8.50	12.80	11.56
GGCT	SLC16A1	853	121	716	892	912	0.344	8.48	8.81	10.15	10.03	9.51	11.45	9.28	8.50	9.53	11.56
IDI1	SLC16A1	208	196	165	389	922	0.844	11.68	8.81	11.88	10.03	12.37	11.45	11.45	8.50	12.33	11.56
OXNAD1	SLC16A1	749	314	562	568	926	0.662	9.29	8.81	7.74	10.03	9.64	11.45	7.79	8.50	9.24	11.56
ARHGAP30	SLC1A2	282	108	215	345	131	0.000	14.26	6.55	5.78	17.73	8.61	11.18	11.40	4.86	7.30	6.49
ITGB7	SLC1A2	64	447	242	261	327	0.000	11.72	6.55	4.64	17.73	8.41	11.18	7.94	4.86	5.52	6.49
LPAR2	SLC1A2	178	94	184	196	204	0.000	13.25	6.55	7.45	17.73	7.66	11.18	9.90	4.86	6.05	6.49
ATP2A2	SLC1A3	384	144	771	597	459	0.000	11.26	9.11	13.85	15.59	13.40	6.22	13.45	9.85	16.43	10.25
RALGAPA2	SLC1A3	953	406	715	164	811	0.359	12.20	9.11	9.86	15.59	12.50	6.22	12.57	9.85	12.29	10.25
HIVEP3	SLC22A18AS	363	429	297	96	38	0.000	8.90	6.74	9.75	3.80	7.64	7.48	9.52	3.65	8.11	2.94
EPAS1	SLC25A3	359	399	869	477	790	0.435	9.57	12.78	12.89	13.29	13.73	13.70	17.49	13.79	12.61	14.79
C7orf73	SLC25A44	276	606	732	851	868	0.392	11.44	12.26	9.33	11.39	10.50	11.61	9.70	10.35	10.98	10.57
CDC26	SLC25A44	733	693	173	700	898	0.483	8.56	12.26	5.91	11.39	7.37	11.61	6.45	10.35	7.83	10.57
MTMR3	SLC29A1	53	496	382	813	675	0.263	13.76	10.01	11.45	10.67	10.99	11.43	12.24	11.62	12.10	12.12
CASC3	SLC35A1	719	658	969	917	969	0.306	13.41	9.72	12.50	9.75	11.55	9.75	12.73	10.12	12.48	9.33
LARP4B	SLC35D1	943	951	556	662	691	0.082	11.55	9.28	10.57	8.47	10.91	12.63	11.81	9.03	12.04	10.19
MKRN1	SLC35D1	344	880	770	843	963	0.429	13.65	9.28	11.64	8.47	11.33	12.63	11.91	9.03	12.11	10.19
ARPC5L	SLC35E3	372	905	632	220	646	0.153	10.88	9.18	11.60	7.69	10.90	8.58	10.85	7.98	11.00	8.72
CHD2	SLC37A4	680	848	697	113	478	0.000	12.44	9.11	12.00	8.69	12.11	12.96	13.17	8.75	12.39	10.92
GPD2	SLC37A4	729	495	521	934	586	0.075	10.15	9.11	10.51	8.69	8.40	12.96	10.24	8.75	11.19	10.92
MLXIP	SLC37A4	155	940	169	619	768	0.343	12.88	9.11	11.26	8.69	12.22	12.96	12.95	8.75	14.41	10.92
NCK2	SLC37A4	488	892	214	459	898	0.600	11.16	9.11	10.68	8.69	8.84	12.96	10.87	8.75	11.12	10.92
PGK1	SLC37A4	254	915	613	769	898	0.406	14.92	9.11	13.85	8.69	13.20	12.96	13.72	8.75	14.25	10.92
ACSL1	SLC41A1	25	444	335	582	73	0.000	16.81	9.56	10.48	11.36	15.79	8.89	14.09	11.12	15.03	12.12
APOO	SLC41A1	337	579	861	477	884	0.548	8.02	9.56	9.77	11.36	8.10	8.89	6.73	11.12	9.50	12.12
ATP5L	SLC41A1	337	637	842	747	924	0.485	11.23	9.56	11.58	11.36	11.61	8.89	11.14	11.12	12.13	12.12
COX10	SLC41A1	952	588	787	433	752	0.208	9.09	9.56	7.91	11.36	9.09	8.89	7.78	11.12	11.31	12.12
EIF3K	SLC41A1	831	495	852	806	866	0.237	12.46	9.56	11.78	11.36	11.76	8.89	11.98	11.12	13.28	12.12
ETFB	SLC41A1	292	531	580	450	893	0.731	10.92	9.56	11.17	11.36	13.28	8.89	9.93	11.12	11.97	12.12
GSTO1	SLC41A1	154	557	615	776	622	0.097	12.05	9.56	11.05	11.36	13.09	8.89	11.93	11.12	11.24	12.12
HCCS	SLC41A1	214	556	933	824	894	0.401	9.84	9.56	8.58	11.36	9.03	8.89	8.48	11.12	10.87	12.12
HDDC3	SLC41A1	431	456	855	240	502	0.003	8.33	9.56	7.09	11.36	7.83	8.89	5.91	11.12	7.51	12.12
MDH1	SLC41A1	582	323	847	546	948	0.658	10.88	9.56	14.16	11.36	12.44	8.89	11.27	11.12	13.37	12.12
MPC1	SLC41A1	706	700	798	736	937	0.404	9.83	9.56	10.96	11.36	12.83	8.89	9.96	11.12	11.53	12.12
MPC2	SLC41A1	216	490	653	761	921	0.635	9.96	9.56	10.96	11.36	12.34	8.89	9.22	11.12	11.48	12.12
MRPS36	SLC41A1	188	739	655	625	836	0.412	9.35	9.56	9.18	11.36	9.84	8.89	8.68	11.12	10.41	12.12
NDUFA10	SLC41A1	749	562	667	749	977	0.591	11.21	9.56	12.53	11.36	12.30	8.89	11.36	11.12	12.73	12.12
NDUFA8	SLC41A1	338	495	912	431	919	0.632	9.50	9.56	11.21	11.36	10.06	8.89	9.09	11.12	11.51	12.12
PLA2G12A	SLC41A1	555	775	815	758	975	0.498	8.77	9.56	10.15	11.36	10.90	8.89	9.63	11.12	10.89	12.12
SH3KBP1	SLC41A1	565	273	865	807	871	0.373	12.92	9.56	10.81	11.36	9.33	8.89	11.13	11.12	9.10	12.12
PATL1	SLC41A3	732	579	955	619	879	0.353	12.08	9.89	9.42	11.75	11.30	9.51	11.32	10.18	11.89	11.43
MFSD4	SLC50A1	636	395	171	31	499	0.000	6.29	10.41	12.09	7.28	6.02	10.60	8.80	9.81	6.29	8.04
CRIPAK	SLK	817	723	595	473	888	0.459	10.25	10.97	9.12	10.95	10.36	10.84	10.23	12.40	9.72	12.04
LUC7L3	SLK	961	944	691	821	849	0.093	11.57	10.97	13.58	10.95	12.93	10.84	13.82	12.40	13.05	12.04
NFIA	SLK	749	601	541	758	540	0.000	8.50	10.97	10.81	10.95	11.69	10.84	10.64	12.40	10.88	12.04
PNISR	SLK	984	954	725	822	771	0.023	11.95	10.97	13.05	10.95	12.89	10.84	13.70	12.40	13.12	12.04
RBBP6	SLU7	979	831	715	949	930	0.157	10.49	11.18	11.17	11.20	11.36	9.80	11.54	10.30	11.65	11.45
PARD3	SMARCA2	453	308	893	939	330	0.000	6.98	11.49	9.15	12.72	10.60	11.56	10.86	12.12	12.11	12.20
MAP2K3	SMARCA4	181	414	503	640	238	0.000	13.77	11.30	9.09	12.64	12.17	11.08	11.90	12.03	12.30	11.82
BAIAP2-AS1	SMOX	211	4	252	401	332	0.000	9.19	10.66	11.71	11.19	9.16	7.68	9.67	7.57	6.66	8.10
HLA-DOA	SMOX	68	211	105	312	298	0.000	10.15	10.66	4.67	11.19	6.87	7.68	9.91	7.57	6.18	8.10
FNBP1	SNAP47	873	185	869	463	958	0.545	12.67	9.80	12.19	11.19	10.58	10.00	11.71	8.95	11.06	10.60
HECA	SNAP47	581	865	465	389	839	0.468	12.22	9.80	10.30	11.19	9.84	10.00	11.54	8.95	11.29	10.60
LEF1	SNAPC2	664	191	670	555	686	0.177	10.52	10.07	7.93	9.36	4.32	8.54	7.56	9.06	3.91	8.40
RAC1	SNRNP48	871	768	946	913	980	0.211	12.64	9.49	13.25	8.18	12.45	9.57	13.29	8.76	12.94	9.97
CAMK2B	SNRNP70	118	676	716	229	803	0.410	5.38	13.29	14.04	14.17	9.15	14.27	3.76	13.83	12.91	13.53
EML4	SNTB2	632	806	767	755	891	0.302	11.52	10.68	9.12	9.58	12.15	9.46	12.29	11.16	9.13	10.36
HNMT	SNTB2	760	706	175	449	642	0.142	9.06	10.68	8.41	9.58	11.87	9.46	9.89	11.16	7.84	10.36
PJA1	SNX18	286	236	928	919	957	0.490	9.09	11.65	11.17	8.88	8.48	10.14	9.58	10.21	8.82	9.57
HNRNPU-AS1	SNX2	306	740	582	60	486	0.000	6.49	11.27	4.23	9.95	5.83	10.60	6.39	11.22	7.88	10.72
ABCC3	SNX22	279	78	428	276	724	0.448	10.18	9.33	5.37	9.25	14.13	8.63	11.09	8.57	5.97	4.56
BAIAP2-AS1	SNX22	255	270	474	668	447	0.000	9.19	9.33	11.71	9.25	9.16	8.63	9.67	8.57	6.66	4.56
IRF5	SNX22	415	222	571	375	581	0.127	11.37	9.33	6.65	9.25	8.62	8.63	9.75	8.57	6.39	4.56
LPAR2	SNX22	236	98	413	316	725	0.450	13.25	9.33	7.45	9.25	7.66	8.63	9.90	8.57	6.05	4.56
PANX2	SNX22	131	76	258	341	388	0.000	10.52	9.33	11.77	9.25	9.20	8.63	6.78	8.57	5.77	4.56
NTAN1	SORD	612	815	537	544	867	0.480	10.48	9.38	9.44	8.64	9.40	13.73	9.76	7.64	9.87	8.02
CEBPG	SOS2	847	643	937	872	721	0.039	10.03	11.63	10.30	10.11	11.56	9.99	10.76	10.69	11.93	12.00
CMAS	SOS2	747	526	877	979	913	0.294	9.73	11.63	11.38	10.11	11.12	9.99	9.53	10.69	10.86	12.00
PDE4DIP	SOS2	325	820	790	948	545	0.022	10.56	11.63	13.90	10.11	12.52	9.99	13.01	10.69	16.50	12.00
PSMD1	SOS2	874	550	925	834	883	0.196	11.26	11.63	12.07	10.11	11.57	9.99	11.53	10.69	13.23	12.00
SGK1	SOX4	767	58	362	61	334	0.000	10.90	8.39	10.68	7.77	12.08	7.90	13.19	10.48	10.41	8.03
GALNT11	SPARC	162	289	752	648	867	0.534	9.61	12.02	11.14	13.41	9.64	12.88	10.14	16.25	10.08	13.44
IFT20	SPARC	193	295	636	687	615	0.115	9.23	12.02	8.89	13.41	9.17	12.88	8.40	16.25	7.93	13.44
ARID1B	SPATS2L	729	861	905	948	741	0.006	10.77	8.58	10.99	11.34	10.56	11.96	11.49	11.46	12.06	11.27
SETD6	SPATS2L	807	778	629	853	265	0.000	8.11	8.58	8.08	11.34	9.05	11.96	8.17	11.46	9.81	11.27
CLEC16A	SPEG	725	974	321	203	561	0.061	10.70	8.08	11.21	12.03	10.75	6.88	10.74	10.07	11.02	14.72
DNM2	SPEG	467	470	433	82	759	0.518	13.83	8.08	11.67	12.03	12.27	6.88	13.44	10.07	12.72	14.72
KIAA2013	SPEG	205	898	367	326	897	0.596	12.20	8.08	10.26	12.03	11.97	6.88	10.76	10.07	11.49	14.72
PUF60	SPEG	709	928	201	161	445	0.000	11.79	8.08	12.22	12.03	12.48	6.88	11.76	10.07	12.16	14.72
ASB10	SPG7	101	108	96	50	897	0.794	1.72	11.54	0.21	12.31	0.60	12.41	0.28	11.75	10.74	12.07
PI4KB	SPTB	89	820	764	746	829	0.243	11.93	10.96	11.84	11.13	11.33	7.55	12.00	7.92	11.98	14.81
KDELR2	SPTBN1	666	715	806	528	914	0.470	11.11	10.89	10.42	15.77	13.82	13.80	12.82	16.05	11.29	13.21
E2F4	SQLE	804	808	544	844	467	0.000	12.00	8.74	10.79	9.80	10.98	10.41	11.60	10.21	11.32	6.56
KCNJ5	SQLE	101	697	435	767	513	0.013	3.30	8.74	4.25	9.80	3.09	10.41	6.52	10.21	3.96	6.56
SLC5A2	SQLE	334	479	134	651	47	0.000	4.19	8.74	1.77	9.80	2.51	10.41	2.89	10.21	1.27	6.56
ADAR	SRGN	869	214	526	616	820	0.409	14.06	16.61	13.41	9.17	13.21	10.02	13.65	13.66	11.51	9.93
MIR568	SRP72	101	331	147	194	355	0.000	1.01	11.08	1.40	10.59	2.42	11.27	1.64	11.35	3.62	11.25
CCNG1	SRRD	449	563	583	728	866	0.545	10.75	9.75	9.88	8.92	11.65	8.62	11.03	7.87	12.46	10.32
FLJ37453	SRRD	101	108	96	50	47	0.000	0.00	9.75	0.00	8.92	0.00	8.62	0.00	7.87	0.00	10.32
KIAA1715	SRSF11	928	879	512	853	920	0.258	10.16	11.90	9.94	12.90	10.12	13.61	9.48	13.92	11.10	13.06
IRF5	SSTR3	636	322	0	230	0	0.000	11.37	8.08	6.65	9.05	8.62	1.16	9.75	1.84	6.39	0.64
DCUN1D2	ST13	523	734	642	845	915	0.458	9.71	12.12	9.75	12.85	9.18	13.24	8.97	12.75	11.64	13.79
SLC37A4	ST3GAL2	149	882	275	758	928	0.536	9.11	12.03	8.69	10.05	12.96	9.93	8.75	9.79	10.92	10.29
CPSF6	ST7	751	920	952	733	896	0.154	10.71	8.96	11.22	9.36	11.03	10.54	11.95	10.22	11.36	9.27
SEH1L	ST7	822	858	829	873	543	0.000	9.21	8.96	9.90	9.36	10.19	10.54	9.66	10.22	10.40	9.27
ATL2	STAT5B	893	909	901	896	817	0.000	9.63	14.08	9.78	11.53	11.54	11.67	10.41	12.45	11.77	12.84
LRIG1	STAT5B	61	566	690	762	916	0.573	9.20	14.08	12.07	11.53	11.38	11.67	11.05	12.45	11.89	12.84
FGFR1	STAT6	261	382	830	407	985	0.805	9.51	14.34	11.55	11.26	9.48	13.30	12.83	13.94	11.29	10.59
NCK2	STEAP3	536	365	303	111	171	0.000	11.16	9.44	10.68	6.27	8.84	14.18	10.87	9.36	11.12	10.75
AHNAK	STIM2	915	161	653	783	357	0.000	13.24	10.40	13.74	10.04	13.90	9.72	16.95	10.45	15.51	9.34
PADI2	STIP1	20	158	704	600	177	0.000	13.66	11.95	12.30	12.42	6.18	11.68	8.83	11.98	14.46	12.65
ASB10	STK25	101	108	96	50	551	0.102	1.72	11.38	0.21	12.83	0.60	11.90	0.28	12.00	10.74	13.78
PARP6	STK40	517	743	280	807	980	0.676	11.64	13.50	11.96	10.98	10.81	11.96	11.59	12.09	11.82	13.13
ASB10	STUB1	101	108	96	50	756	0.512	1.72	10.29	0.21	11.02	0.60	9.98	0.28	9.63	10.74	11.14
RBM38	STUB1	327	415	754	801	882	0.486	13.58	10.29	9.15	11.02	9.63	9.98	9.99	9.63	12.97	11.14
RNF10	SUGP2	42	991	866	835	843	0.175	14.96	11.45	12.81	13.02	12.50	11.44	12.99	12.20	14.17	11.93
HIST1H2AC	SUN1	481	256	285	403	607	0.214	13.01	10.37	8.29	12.29	10.98	12.11	9.89	12.90	10.03	13.18
CRIPAK	SUPT16H	782	691	690	803	979	0.475	10.25	11.25	9.12	11.63	10.36	11.12	10.23	11.76	9.72	11.50
GABARAPL1	SYNGR2	277	89	665	614	845	0.550	12.53	12.91	13.99	10.05	13.16	11.88	13.03	13.06	13.68	13.30
OBSL1	SYNGR2	282	174	682	613	657	0.179	6.88	12.91	12.16	10.05	11.57	11.88	11.74	13.06	12.39	13.30
NEURL1	SZRD1	101	108	96	50	47	0.000	0.00	11.96	0.00	10.35	0.00	11.43	0.00	11.69	0.00	12.13
CCNDBP1	TAF1D	134	858	714	224	852	0.421	12.79	10.47	10.52	10.65	10.01	10.71	10.76	11.22	11.19	11.13
SORBS2	TAGLN	407	286	315	527	855	0.697	6.27	10.83	11.12	10.12	12.31	11.73	9.69	14.61	9.37	11.68
CHMP2B	TARDBP	871	932	947	957	918	0.024	10.83	11.63	9.81	12.26	10.42	12.75	10.30	12.93	10.84	12.84
SLC16A1	TATDN3	470	397	688	336	825	0.556	8.81	9.14	10.03	8.98	11.45	8.39	8.50	7.68	11.56	9.77
TACO1	TAZ	924	497	551	607	937	0.583	9.13	11.87	9.08	10.31	11.28	10.48	7.76	10.77	10.54	10.42
PARP6	TBC1D1	646	890	474	781	887	0.367	11.64	12.29	11.96	10.80	10.81	10.86	11.59	11.65	11.82	12.62
SH3GLB1	TBC1D4	90	732	750	666	915	0.506	13.20	9.28	11.02	9.89	11.12	10.21	12.52	10.36	13.55	13.15
HSDL2	TBC1D8	965	115	383	144	216	0.000	11.41	11.17	10.71	8.73	12.79	11.24	10.38	11.23	12.91	12.57
NDRG2	TBCC	149	18	627	434	829	0.595	8.85	10.53	16.77	9.35	13.94	8.82	12.41	8.28	15.25	9.85
CDC73	TBRG1	978	747	929	860	930	0.127	10.74	10.80	9.08	10.27	9.54	10.62	10.10	10.73	10.62	10.39
NFIA	TBRG1	786	29	270	821	516	0.016	8.50	10.80	10.81	10.27	11.69	10.62	10.64	10.73	10.88	10.39
EML2	TBXA2R	345	236	760	518	423	0.000	10.67	7.94	11.19	4.43	9.21	8.26	9.90	7.35	8.46	5.99
HIP1R	TBXA2R	184	486	634	335	287	0.000	10.69	7.94	13.04	4.43	11.62	8.26	11.18	7.35	9.71	5.99
LAMC1	TCEAL8	540	603	988	831	718	0.146	8.97	9.05	9.52	10.11	10.85	9.16	14.22	9.76	13.10	8.40
NFIA	TCERG1	596	203	153	616	644	0.182	8.50	10.05	10.81	11.54	11.69	10.70	10.64	11.29	10.88	11.67
FAM13A	TCF12	813	382	650	784	789	0.216	9.97	10.15	10.53	10.41	11.26	10.59	10.10	11.36	9.99	11.09
PSMD11	TCF12	865	674	940	750	974	0.334	11.11	10.15	11.21	10.41	11.64	10.59	11.56	11.36	12.91	11.09
ST7	TCF12	898	628	982	807	811	0.093	8.96	10.15	9.36	10.41	10.54	10.59	10.22	11.36	9.27	11.09
AKT3	TCF7L2	863	349	454	825	975	0.606	9.09	9.55	11.69	9.34	8.17	10.97	10.97	10.31	9.55	9.37
CBX5	TCF7L2	810	688	647	877	933	0.355	10.41	9.55	12.06	9.34	10.83	10.97	11.63	10.31	10.85	9.37
CTSK	TCF7L2	589	588	436	559	980	0.842	9.37	9.55	6.74	9.34	8.27	10.97	10.25	10.31	9.04	9.37
IFT80	TCF7L2	916	359	705	590	943	0.530	8.23	9.55	10.86	9.34	9.40	10.97	9.83	10.31	8.70	9.37
LRRC8C	TCF7L2	928	772	416	883	940	0.339	10.33	9.55	8.58	9.34	7.21	10.97	9.85	10.31	8.84	9.37
MAGEH1	TCF7L2	723	408	587	682	923	0.600	8.10	9.55	10.79	9.34	8.89	10.97	9.47	10.31	8.46	9.37
TCF4	TCF7L2	934	779	414	847	979	0.428	8.81	9.55	12.13	9.34	9.02	10.97	12.57	10.31	11.15	9.37
ACOT7	TEAD2	652	5	279	345	706	0.336	8.95	6.33	12.56	6.07	9.34	8.55	9.09	10.59	7.77	9.04
ELOVL5	TGFBI	615	495	374	744	930	0.680	12.27	12.14	11.15	6.34	12.33	12.12	12.34	12.61	9.27	10.56
GOLGB1	TGFBR1	848	619	842	811	968	0.376	11.58	11.62	12.22	8.03	12.41	10.10	12.65	11.20	11.88	10.21
RDH11	TGFBR2	655	408	687	900	958	0.545	10.36	12.65	11.31	9.05	12.37	11.55	10.99	14.21	8.97	11.60
GLIPR2	THBS3	967	401	263	630	961	0.626	13.44	10.41	8.00	8.98	7.51	9.84	11.39	10.06	8.06	8.65
PRR11	THUMPD1	734	600	695	662	613	0.006	8.19	9.77	4.38	10.07	3.99	10.53	4.78	10.57	5.10	10.63
SCN1B	TIMM13	562	843	266	771	903	0.468	9.24	9.90	13.24	10.23	8.10	11.27	8.34	9.66	14.07	10.69
CA2	TIMM23	234	403	629	696	663	0.180	10.29	9.40	10.88	9.86	12.01	10.17	9.30	8.85	10.45	10.83
ARMC10	TIMP1	184	35	766	329	769	0.405	9.66	13.76	10.38	8.70	10.14	12.29	9.77	14.64	9.69	9.77
IGFBP4	TKT	13	629	349	243	898	0.732	9.15	15.79	10.00	12.70	15.82	12.26	14.91	13.57	12.06	10.14
ASB10	TLE2	101	108	96	50	779	0.558	1.72	8.30	0.21	11.10	0.60	9.97	0.28	11.74	10.74	11.53
CYBRD1	TLK1	817	216	699	803	862	0.315	10.73	10.70	10.79	10.92	9.89	10.92	13.57	10.32	11.05	10.21
CCSER2	TMBIM4	25	727	949	868	927	0.343	10.75	11.59	11.41	9.22	10.15	11.31	11.24	11.22	12.40	10.54
DHX36	TMBIM4	769	709	939	968	664	0.000	10.25	11.59	10.44	9.22	10.21	11.31	10.77	11.22	12.13	10.54
MYOZ3	TMBIM6	305	156	43	219	15	0.000	4.58	14.66	6.26	14.32	3.56	15.53	4.85	15.00	11.64	13.59
GLP1R	TMC6	101	61	96	355	47	0.000	2.93	12.81	2.24	9.67	0.54	9.26	2.92	11.96	0.91	8.16
ACVR2A	TMCC3	381	264	789	648	793	0.367	7.85	11.95	8.40	8.55	8.92	7.54	8.82	9.11	9.23	11.09
GPALPP1	TMCC3	446	470	567	855	655	0.199	8.71	11.95	9.15	8.55	8.80	7.54	8.77	9.11	9.42	11.09
MSRB3	TMED2	901	604	167	596	596	0.048	8.88	11.72	9.54	10.77	8.06	13.48	11.84	12.49	12.10	12.03
IRF5	TMEM105	0	0	338	667	342	0.000	11.37	3.27	6.65	0.79	8.62	7.29	9.75	3.01	6.39	4.64
NEURL1	TMEM109	101	108	96	50	47	0.000	0.00	11.04	0.00	10.21	0.00	11.02	0.00	12.51	0.00	12.08
ACOT11	TMEM120A	89	569	512	792	318	0.000	6.42	12.32	7.04	9.99	4.72	11.71	6.07	10.33	7.85	11.43
ACSS1	TMEM120A	54	468	76	788	637	0.205	11.00	12.32	12.16	9.99	9.81	11.71	11.33	10.33	11.58	11.43
LDHB	TMEM120A	51	837	595	918	759	0.211	12.28	12.32	14.91	9.99	9.67	11.71	13.24	10.33	12.69	11.43
ARHGAP30	TMEM132A	293	58	840	283	593	0.140	14.26	6.23	5.78	12.86	8.61	6.14	11.40	8.98	7.30	7.67
CALD1	TMEM14A	436	276	660	585	955	0.787	8.47	6.92	11.26	10.23	13.72	10.11	14.58	7.65	12.01	6.29
COL1A1	TMEM14A	411	77	159	588	897	0.750	8.40	6.92	6.87	10.23	11.90	10.11	14.71	7.65	10.66	6.29
FSTL1	TMEM14A	332	339	202	594	772	0.497	8.75	6.92	10.39	10.23	11.17	10.11	14.56	7.65	11.59	6.29
HIF1A	TMEM14A	473	520	32	52	671	0.332	13.10	6.92	10.92	10.23	11.19	10.11	13.28	7.65	10.20	6.29
KCTD12	TMEM14A	334	555	193	859	870	0.533	11.50	6.92	10.38	10.23	8.50	10.11	12.91	7.65	10.85	6.29
RGL1	TMEM14A	400	830	379	699	914	0.564	9.07	6.92	11.58	10.23	8.96	10.11	11.26	7.65	8.44	6.29
TGFBR2	TMEM14A	400	253	171	835	736	0.354	12.65	6.92	9.05	10.23	11.55	10.11	14.21	7.65	11.60	6.29
HLA-DOA	TMEM198	678	138	133	290	417	0.000	10.15	5.66	4.67	9.47	6.87	7.55	9.91	6.67	6.18	7.05
TLE2	TMEM203	501	686	552	768	884	0.514	8.30	10.08	11.10	10.30	9.97	10.67	11.74	9.40	11.53	10.59
EIF4G3	TMEM38B	815	334	962	891	880	0.223	11.42	7.91	12.37	6.71	10.99	9.10	11.46	7.66	12.27	11.76
AOAH	TMEM59L	104	351	372	10	610	0.220	12.91	4.19	4.85	14.41	7.34	3.67	8.81	4.62	4.97	7.09
RUNX3	TMEM59L	213	36	123	9	228	0.000	12.38	4.19	4.53	14.41	7.66	3.67	9.50	4.62	5.70	7.09
RUNX3	TMEM63A	840	140	289	637	495	0.000	12.38	12.12	4.53	11.23	7.66	12.14	9.50	12.20	5.70	10.43
AHCYL1	TMOD1	13	160	782	708	821	0.397	11.39	9.53	14.46	10.04	12.09	9.19	12.49	8.79	12.94	13.03
CMBL	TMOD1	745	695	1	157	534	0.034	7.17	9.53	9.51	10.04	12.25	9.19	8.09	8.79	12.16	13.03
PLP2	TMOD1	2	98	976	296	734	0.351	13.24	9.53	5.88	10.04	8.30	9.19	11.00	8.79	10.35	13.03
RNF135	TMOD1	2	31	266	74	798	0.596	11.17	9.53	6.66	10.04	8.31	9.19	9.67	8.79	8.64	13.03
TBCC	TMOD1	2	948	159	40	756	0.384	10.53	9.53	9.35	10.04	8.82	9.19	8.28	8.79	9.85	13.03
CLOCK	TNFAIP3	646	35	637	139	134	0.000	8.86	12.45	10.19	6.55	9.93	10.38	10.26	12.58	11.21	9.32
P2RX5	TNFRSF12A	383	5	331	40	861	0.722	10.72	8.84	8.86	4.60	5.97	9.06	6.35	10.50	10.04	9.84
C22orf39	TNIP1	668	968	893	324	822	0.238	10.34	14.02	11.01	11.07	9.63	12.82	9.78	12.92	12.49	13.42
LARGE	TNIP1	249	810	588	578	739	0.276	7.33	14.02	11.49	11.07	9.65	12.82	9.29	12.92	11.84	13.42
SLC39A14	TNS3	489	20	919	20	595	0.142	8.03	9.83	9.97	12.79	15.51	12.88	11.00	13.18	11.09	11.48
AGPAT3	TP53INP2	461	250	377	624	640	0.218	11.40	10.04	12.76	13.42	12.71	11.47	11.53	10.98	12.78	11.80
CHPT1	TP53INP2	101	63	454	597	274	0.000	11.93	10.04	10.85	13.42	11.91	11.47	10.99	10.98	10.38	11.80
CIAPIN1	TP53INP2	592	146	474	457	342	0.000	10.19	10.04	10.37	13.42	10.27	11.47	9.97	10.98	10.77	11.80
CNOT11	TP53INP2	677	242	190	409	137	0.000	10.67	10.04	9.58	13.42	10.84	11.47	10.00	10.98	10.95	11.80
DPH2	TP53INP2	581	379	418	318	147	0.000	9.68	10.04	9.57	13.42	9.74	11.47	9.04	10.98	10.95	11.80
FAM96A	TP53INP2	353	348	198	246	828	0.656	9.94	10.04	8.24	13.42	12.15	11.47	9.36	10.98	10.26	11.80
RNF135	TPD52	59	55	731	927	666	0.166	11.17	9.26	6.66	12.03	8.31	10.87	9.67	9.29	8.64	8.78
SERPINE2	TPD52	733	522	267	123	685	0.267	7.32	9.26	12.58	12.03	8.07	10.87	8.87	9.29	7.91	8.78
ARHGAP24	TPM3	874	887	451	732	225	0.000	10.10	14.52	9.37	13.07	8.04	12.34	9.50	14.00	8.45	16.12
KLHDC8B	TPM3	267	886	424	557	868	0.523	9.97	14.52	9.54	13.07	9.44	12.34	10.03	14.00	10.46	16.12
NUDT21	TRA2A	990	703	793	955	914	0.166	10.28	11.04	11.32	10.91	10.64	11.08	11.08	11.36	11.15	10.24
SNX2	TRA2A	929	776	475	889	902	0.271	11.27	11.04	9.95	10.91	10.60	11.08	11.22	11.36	10.72	10.24
TP53TG1	TRABD	721	482	241	539	485	0.000	8.26	12.75	6.89	9.53	9.32	11.15	7.30	11.25	8.47	10.58
TMEM14A	TRIM22	322	231	624	566	805	0.515	6.92	13.19	10.23	8.52	10.11	10.13	7.65	12.59	6.29	9.51
COL6A1	TRIM27	43	684	444	671	170	0.000	8.83	12.24	12.83	10.57	13.28	11.97	15.30	11.22	12.76	10.50
KAT2B	TRIM32	648	91	869	836	698	0.124	11.38	8.12	11.46	8.32	10.96	8.17	10.49	8.15	11.94	10.54
BRF2	TSC22D3	632	724	28	462	715	0.257	8.05	15.35	6.70	12.20	6.92	12.41	6.43	14.82	9.47	14.40
LEF1	TSC22D4	407	422	667	744	653	0.153	10.52	13.32	7.93	13.19	4.32	10.40	7.56	11.26	3.91	10.35
TMCC3	TSHZ1	356	101	590	710	635	0.158	11.95	9.25	8.55	10.61	7.54	9.88	9.11	9.78	11.09	9.80
ARSD	TSHZ2	325	40	181	27	884	0.768	10.03	7.26	7.62	7.48	11.49	9.27	9.70	7.42	7.24	7.76
CALD1	TSPAN13	395	122	491	507	843	0.682	8.47	7.83	11.26	11.31	13.72	10.59	14.58	12.25	12.01	8.93
FAM172A	TSPAN13	529	871	490	786	802	0.295	9.69	7.83	9.69	11.31	8.45	10.59	9.23	12.25	8.45	8.93
IFITM1	TSPAN13	88	8	500	197	841	0.682	13.62	7.83	9.11	11.31	10.36	10.59	11.02	12.25	10.14	8.93
JAG1	TSPAN13	710	276	231	470	818	0.531	8.20	7.83	9.19	11.31	9.31	10.59	12.08	12.25	10.40	8.93
NAB1	TSPAN13	775	783	618	735	823	0.191	9.71	7.83	10.14	11.31	10.66	10.59	10.45	12.25	9.11	8.93
PPFIA1	TSPAN3	908	818	937	963	642	0.000	11.07	10.40	10.91	13.52	10.72	11.31	11.26	13.46	11.34	13.16
CORO1C	TSPYL4	900	793	89	767	865	0.268	12.04	9.53	11.17	12.48	11.44	9.71	13.02	9.85	11.37	9.17
GNS	TSPYL4	815	835	60	746	898	0.348	13.48	9.53	10.62	12.48	11.77	9.71	13.23	9.85	11.76	9.17
SIDT2	TSPYL4	658	719	490	770	897	0.470	11.89	9.53	11.30	12.48	11.85	9.71	12.17	9.85	11.19	9.17
ARID1B	TSR1	936	973	754	412	992	0.403	10.77	9.12	10.99	9.47	10.56	9.65	11.49	9.43	12.06	11.66
CIR1	TSR1	536	935	633	513	889	0.492	11.70	9.12	10.12	9.47	9.77	9.65	10.10	9.43	10.43	11.66
DCAF6	TSR1	553	958	555	583	824	0.391	11.06	9.12	12.16	9.47	12.31	9.65	10.99	9.43	14.90	11.66
DHRS7	TSR1	414	812	940	969	980	0.349	12.80	9.12	10.47	9.47	11.50	9.65	10.87	9.43	13.62	11.66
EIF4E3	TSR1	508	979	898	419	966	0.496	12.33	9.12	11.06	9.47	9.20	9.65	10.48	9.43	12.11	11.66
GINM1	TSR1	732	719	980	636	958	0.394	10.33	9.12	9.87	9.47	10.14	9.65	10.92	9.43	10.98	11.66
INPP5A	TSR1	499	988	754	515	834	0.366	10.68	9.12	10.60	9.47	9.64	9.65	10.72	9.43	11.56	11.66
MKRN1	TSR1	191	999	901	580	936	0.413	13.65	9.12	11.64	9.47	11.33	9.65	11.91	9.43	12.11	11.66
OSBPL1A	TSR1	320	937	884	621	657	0.097	9.47	9.12	12.80	9.47	9.20	9.65	10.36	9.43	12.48	11.66
PRUNE	TSR1	785	982	377	751	843	0.246	10.30	9.12	9.01	9.47	9.64	9.65	9.18	9.43	10.82	11.66
RNF13	TSR1	479	879	960	860	957	0.316	12.18	9.12	10.75	9.47	11.09	9.65	11.45	9.43	10.74	11.66
SOS2	TSR1	474	734	952	741	832	0.261	11.63	9.12	10.11	9.47	9.99	9.65	10.69	9.43	12.00	11.66
TOR1AIP1	TSR1	615	598	771	813	846	0.293	11.71	9.12	10.60	9.47	10.81	9.65	11.32	9.43	11.95	11.66
TSC22D3	TSR1	276	691	48	185	877	0.658	15.35	9.12	12.20	9.47	12.41	9.65	14.82	9.43	14.40	11.66
ASB10	TSR3	101	108	96	50	887	0.774	1.72	10.44	0.21	10.22	0.60	10.25	0.28	9.54	10.74	10.67
ARHGAP18	TTC3	708	700	730	839	796	0.125	9.71	10.92	6.02	14.07	7.83	12.53	11.17	12.46	8.93	11.88
COX6A1	TUBA1A	758	534	596	889	939	0.489	11.16	13.17	12.91	14.99	12.32	8.88	11.10	12.56	8.75	9.58
IFT20	TUBA1A	649	776	843	796	594	0.000	9.23	13.17	8.89	14.99	9.17	8.88	8.40	12.56	7.93	9.58
PON2	TUBA1A	163	71	793	471	713	0.320	8.34	13.17	12.59	14.99	12.88	8.88	12.64	12.56	9.48	9.58
RAB13	TUBA1A	73	84	844	568	763	0.360	9.72	13.17	9.41	14.99	11.48	8.88	11.79	12.56	10.05	9.58
ANXA4	TUBB2A	105	142	869	727	618	0.118	10.66	9.27	8.89	13.64	12.12	10.12	11.82	7.76	9.84	8.70
DPYSL2	TUBB2A	85	674	505	447	504	0.004	10.47	9.27	15.09	13.64	10.17	10.12	13.73	7.76	10.69	8.70
KIAA0247	TUBB2A	42	518	686	630	697	0.227	12.65	9.27	10.15	13.64	10.59	10.12	12.61	7.76	10.64	8.70
RIN2	TUBB2A	48	7	517	214	387	0.000	9.12	9.27	9.84	13.64	8.99	10.12	11.68	7.76	9.83	8.70
SERP1	TUBB2A	56	326	668	829	733	0.266	12.72	9.27	11.81	13.64	13.37	10.12	12.80	7.76	10.05	8.70
SKI	TUBB2A	75	595	515	614	646	0.180	11.32	9.27	12.05	13.64	11.73	10.12	12.68	7.76	11.46	8.70
KIDINS220	TUBB6	451	178	616	664	208	0.000	11.10	9.11	11.92	7.66	11.01	8.64	12.03	11.85	11.43	9.41
LASP1	TUBB6	324	93	623	835	866	0.503	13.69	9.11	12.15	7.66	12.63	8.64	12.98	11.85	10.19	9.41
MAN1A1	TUBB6	422	112	210	512	644	0.282	11.60	9.11	8.42	7.66	13.54	8.64	12.14	11.85	9.85	9.41
OSBPL7	TULP4	930	810	349	732	223	0.000	10.33	8.87	10.56	11.14	7.72	9.29	9.98	9.61	9.68	10.73
HEXIM1	TXNDC15	871	953	284	862	877	0.199	11.28	9.98	10.61	10.33	11.03	10.26	10.64	10.62	10.98	10.60
EEA1	UACA	845	551	809	816	955	0.400	8.93	7.49	9.21	9.31	9.91	10.57	10.26	12.26	11.22	13.86
FMR1	UACA	741	438	868	916	818	0.198	10.61	7.49	11.23	9.31	11.53	10.57	10.91	12.26	9.82	13.86
GTF2H1	UACA	857	175	540	303	603	0.135	10.05	7.49	9.98	9.31	9.96	10.57	9.84	12.26	10.18	13.86
HIST1H2AC	UACA	454	631	187	369	800	0.534	13.01	7.49	8.29	9.31	10.98	10.57	9.89	12.26	10.03	13.86
NUCB2	UACA	386	335	27	253	941	0.882	10.29	7.49	9.30	9.31	10.99	10.57	10.78	12.26	9.69	13.86
PAXIP1-AS1	UACA	666	544	697	568	602	0.046	7.98	7.49	8.04	9.31	8.73	10.57	7.63	12.26	8.85	13.86
SKIV2L2	UACA	835	423	623	521	804	0.384	10.13	7.49	10.25	9.31	10.60	10.57	10.74	12.26	11.62	13.86
SNX2	UACA	862	289	417	288	893	0.605	11.27	7.49	9.95	9.31	10.60	10.57	11.22	12.26	10.72	13.86
TAB3	UACA	757	344	849	739	931	0.440	10.46	7.49	9.51	9.31	11.20	10.57	10.09	12.26	10.34	13.86
TCERG1	UACA	624	370	819	413	515	0.015	10.05	7.49	11.54	9.31	10.70	10.57	11.29	12.26	11.67	13.86
TBC1D4	UBE2D1	210	884	650	479	807	0.386	9.28	11.67	9.89	8.57	10.21	8.63	10.36	9.17	13.15	12.05
HIST1H2AC	UBE2D2	747	356	695	325	950	0.679	13.01	11.77	8.29	11.61	10.98	10.88	9.89	11.38	10.03	12.23
ITSN1	UBE2V2	725	951	925	930	984	0.203	9.26	9.28	12.37	11.66	11.69	10.72	10.58	9.81	10.89	11.16
RASGRP3	UBE2V2	746	108	695	679	74	0.000	8.15	9.28	7.96	11.66	7.95	10.72	8.78	9.81	9.70	11.16
CTDSP2	UBE4A	897	748	753	849	863	0.119	13.07	10.52	12.48	9.47	12.81	10.02	14.11	10.05	12.96	10.88
MED13L	UBFD1	699	919	851	615	875	0.230	11.75	9.65	11.17	11.17	10.89	11.05	12.34	10.31	12.11	13.02
MTMR3	UBFD1	371	689	797	668	680	0.096	13.76	9.65	11.45	11.17	10.99	11.05	12.24	10.31	12.10	13.02
SMAD4	UBFD1	850	701	916	925	993	0.290	10.97	9.65	10.55	11.17	11.61	11.05	11.75	10.31	12.26	13.02
SOS2	UBFD1	428	554	907	937	883	0.356	11.63	9.65	10.11	11.17	9.99	11.05	10.69	10.31	12.00	13.02
ASB10	UBL4A	101	108	96	50	903	0.806	1.72	10.66	0.21	11.38	0.60	10.57	0.28	10.05	10.74	11.67
MAN2A2	UBL4A	618	797	863	757	856	0.198	13.09	10.66	12.51	11.38	12.37	10.57	12.39	10.05	12.95	11.67
MAP2K3	UBP1	425	426	440	617	591	0.137	13.77	10.78	9.09	11.26	12.17	11.31	11.90	11.64	12.30	10.78
GRPEL1	UBR2	542	813	814	489	856	0.378	10.80	12.44	9.89	10.68	11.43	11.31	9.55	11.58	11.20	11.99
IFFO1	UBTD2	784	732	716	814	654	0.000	11.53	8.35	11.27	8.43	10.44	9.28	10.92	9.48	10.23	9.34
EEA1	UBXN2A	954	927	976	942	983	0.067	8.93	8.52	9.21	8.12	9.91	8.79	10.26	8.59	11.22	10.37
GALNT1	UBXN2A	878	906	994	969	1000	0.127	11.13	8.52	9.73	8.12	11.14	8.79	10.74	8.59	11.35	10.37
PDE4DIP	UFL1	733	798	843	928	668	0.000	10.56	9.19	13.90	9.19	12.52	10.79	13.01	10.09	16.50	11.12
CDC37L1	UGGT1	912	915	691	660	935	0.281	8.51	11.37	9.86	9.95	11.36	11.65	9.42	11.16	12.03	11.59
KIAA1671	UGGT1	358	777	933	741	731	0.116	7.51	11.37	11.22	9.95	12.20	11.65	10.60	11.16	11.55	11.59
PFN2	UGGT1	648	777	345	811	936	0.504	7.21	11.37	13.80	9.95	9.22	11.65	9.59	11.16	13.19	11.59
SEZ6L2	UPB1	158	185	7	6	708	0.416	4.22	8.75	12.95	3.79	4.91	13.35	7.12	5.30	6.07	6.15
UACA	UPF2	855	204	664	750	882	0.380	7.49	10.91	9.31	10.35	10.57	10.49	12.26	10.37	13.86	11.40
MYO5A	UPF3A	920	663	739	888	900	0.205	11.30	9.35	13.52	11.11	8.39	10.45	10.50	10.31	10.41	10.45
MCL1	URI1	473	491	756	712	969	0.704	15.36	9.96	11.98	10.48	14.14	10.48	15.43	10.45	13.60	11.65
SEC14L1	URI1	363	485	929	637	980	0.677	13.87	9.96	12.45	10.48	10.54	10.48	13.44	10.45	12.36	11.65
DERL1	USP13	896	970	907	880	801	0.000	11.08	7.62	9.73	8.60	11.43	9.19	11.08	9.67	11.58	14.57
DST	USP13	888	741	537	378	867	0.411	8.25	7.62	14.78	8.60	13.41	9.19	14.55	9.67	14.21	14.57
TMEM131	USP13	679	995	969	886	905	0.122	11.46	7.62	10.80	8.60	11.05	9.19	11.25	9.67	11.81	14.57
CWC27	USP15	551	938	735	655	976	0.512	9.08	13.41	9.30	9.70	8.35	11.56	8.79	11.90	9.94	11.77
FOXP2	USP25	101	721	679	817	702	0.113	2.74	10.90	6.69	10.50	8.17	10.28	6.78	11.05	8.87	12.72
STAT5B	USP25	779	791	935	923	977	0.240	14.08	10.90	11.53	10.50	11.67	10.28	12.45	11.05	12.84	12.72
KPNA1	USP28	549	986	930	805	936	0.262	11.33	9.96	10.72	9.53	10.87	9.47	10.73	9.14	12.74	12.02
SLU7	USP32	887	963	993	788	987	0.162	11.18	12.50	11.20	10.24	9.80	10.35	10.30	10.65	11.45	11.54
DCUN1D2	USP38	952	865	324	756	702	0.101	9.71	10.56	9.75	8.83	9.18	10.46	8.97	9.78	11.64	12.02
ARHGEF10L	USP7	459	800	631	673	692	0.136	9.47	12.02	11.06	12.13	13.76	12.04	10.93	12.21	12.34	12.97
IGF1	UTRN	379	465	362	119	849	0.698	5.41	11.41	5.91	10.72	11.82	10.63	9.51	12.85	9.58	11.12
ITSN1	VAPA	362	970	956	896	971	0.281	9.26	12.88	12.37	12.29	11.69	11.89	10.58	12.72	10.89	12.72
MITF	VAPA	571	671	856	792	839	0.241	7.55	12.88	6.85	12.29	7.32	11.89	9.51	12.72	12.27	12.72
CCND2	VAT1	742	546	436	659	981	0.739	11.18	11.66	11.92	10.90	7.97	11.38	11.63	13.34	8.32	10.72
ARFRP1	VEGFA	108	449	671	632	545	0.045	10.76	11.08	10.72	10.56	10.66	14.23	10.42	13.23	10.36	13.59
FAM96A	VEGFA	22	332	276	278	827	0.654	9.94	11.08	8.24	10.56	12.15	14.23	9.36	13.23	10.26	13.59
HMOX2	VEGFA	54	336	400	495	424	0.000	11.09	11.08	11.58	10.56	11.59	14.23	10.45	13.23	9.99	13.59
SLC22A5	VEGFA	48	237	620	609	763	0.411	8.20	11.08	8.76	10.56	9.57	14.23	8.37	13.23	11.94	13.59
SLC25A3	VEGFA	8	438	273	523	840	0.668	12.78	11.08	13.29	10.56	13.70	14.23	13.79	13.23	14.79	13.59
BCAS2	VGLL4	879	899	958	463	863	0.181	9.60	9.20	10.38	9.75	9.89	8.85	9.11	10.11	10.37	9.40
DOCK9	VIM	214	103	712	440	925	0.744	9.30	15.55	12.33	12.60	9.87	11.72	13.22	15.75	10.88	12.71
TUBB2A	VIM	63	56	207	539	355	0.000	9.27	15.55	13.64	12.60	10.12	11.72	7.76	15.75	8.70	12.71
CYBRD1	VMA21	715	392	524	549	766	0.388	10.73	9.69	10.79	10.44	9.89	9.83	13.57	9.81	11.05	9.93
SCARB2	VPS13A	751	862	926	728	833	0.093	10.85	9.56	12.56	10.56	13.36	10.88	13.76	11.09	13.40	12.18
KAT6A	VPS36	674	683	923	543	948	0.484	12.57	10.25	10.42	10.64	10.86	10.94	12.17	11.24	11.49	11.26
PBX1	VPS37A	77	951	295	645	496	0.000	8.95	10.13	11.46	10.02	8.71	10.41	11.33	10.13	12.18	11.33
ASB10	VPS51	101	108	96	50	460	0.000	1.72	11.90	0.21	11.76	0.60	11.34	0.28	11.35	10.74	12.02
LAMC1	WARS	206	629	925	428	657	0.171	8.97	12.53	9.52	11.61	10.85	10.95	14.22	13.91	13.10	11.79
NEURL1	WBSCR16	101	108	96	50	47	0.000	0.00	9.87	0.00	9.97	0.00	11.39	0.00	9.81	0.00	11.95
CRB3	WDFY2	282	394	932	640	47	0.000	4.93	10.54	2.37	7.82	9.07	9.29	7.94	8.93	1.89	7.67
GRIN1	WDFY2	75	41	257	406	97	0.000	4.28	10.54	15.49	7.82	2.64	9.29	3.16	8.93	3.35	7.67
NPM2	WDFY2	110	9	474	723	420	0.000	4.66	10.54	11.06	7.82	4.88	9.29	4.38	8.93	3.02	7.67
PNMA3	WDFY2	364	34	123	600	339	0.000	8.59	10.54	12.31	7.82	5.58	9.29	5.02	8.93	4.08	7.67
DMPK	WDR1	354	696	500	549	838	0.553	9.98	14.01	12.02	11.82	10.02	12.48	11.87	13.96	13.34	12.44
ITIH4	WDR1	812	358	855	325	480	0.000	10.79	14.01	8.69	11.82	17.05	12.48	9.62	13.96	11.76	12.44
TMCC3	WDR3	458	309	712	660	887	0.588	11.95	8.88	8.55	8.53	7.54	9.78	9.11	8.94	11.09	10.54
EHBP1	WSB1	663	539	418	677	957	0.725	8.41	12.74	11.16	13.03	11.25	12.21	9.69	14.74	9.81	12.27
ADAM28	WWC1	347	194	510	227	156	0.000	9.17	5.78	5.51	11.59	5.64	11.08	7.46	10.89	5.07	3.25
CD6	WWC1	304	374	140	18	154	0.000	11.48	5.78	5.64	11.59	6.39	11.08	8.00	10.89	4.34	3.25
GUCY1A3	XAF1	462	147	614	745	919	0.658	6.77	10.92	8.59	10.64	8.17	12.78	9.91	11.94	8.44	9.96
CFLAR	XPO4	248	704	830	732	7	0.000	14.14	9.25	10.79	9.19	12.55	9.66	14.34	10.01	13.98	11.86
CYB5R1	XPO4	335	841	968	992	693	0.097	11.39	9.25	10.52	9.19	11.03	9.66	11.11	10.01	14.25	11.86
MPC2	XPO4	591	682	879	930	642	0.025	9.96	9.25	10.96	9.19	12.34	9.66	9.22	10.01	11.48	11.86
MYL12A	XPO4	172	417	913	881	978	0.559	14.11	9.25	9.18	9.19	12.13	9.66	13.70	10.01	14.64	11.86
TRIM32	XRN1	713	693	874	295	837	0.302	8.12	11.29	8.32	9.33	8.17	11.31	8.15	11.09	10.54	11.38
PTEN	YES1	46	362	820	610	890	0.565	13.54	8.01	11.40	9.31	12.12	11.06	12.36	10.85	11.45	9.85
LUC7L3	YIPF5	928	788	99	50	833	0.355	11.57	9.89	13.58	9.20	12.93	10.03	13.82	9.76	13.05	9.21
DICER1	YPEL5	763	506	823	895	952	0.410	11.80	12.58	11.12	12.06	11.51	11.25	12.23	12.02	12.14	11.56
KAT6A	YPEL5	908	538	923	907	986	0.334	12.57	12.58	10.42	12.06	10.86	11.25	12.17	12.02	11.49	11.56
NAA16	YPEL5	935	581	802	950	985	0.336	9.43	12.58	8.47	12.06	9.18	11.25	9.52	12.02	10.18	11.56
NASP	YPEL5	772	428	855	938	996	0.460	11.16	12.58	11.56	12.06	11.42	11.25	11.89	12.02	11.19	11.56
SRSF11	YPEL5	965	842	531	896	992	0.367	11.90	12.58	12.90	12.06	13.61	11.25	13.92	12.02	13.06	11.56
ARHGEF6	YWHAG	954	129	482	347	469	0.000	11.94	11.48	10.49	14.79	8.77	12.21	11.28	12.47	11.80	14.37
ACTN1	YWHAQ	486	748	995	679	948	0.459	14.08	11.76	12.23	13.38	12.55	12.00	13.65	13.08	10.75	11.29
CTSK	YWHAQ	751	689	181	505	880	0.537	9.37	11.76	6.74	13.38	8.27	12.00	10.25	13.08	9.04	11.29
LGALS3	YWHAQ	427	79	743	951	981	0.615	12.33	11.76	10.38	13.38	8.29	12.00	13.20	13.08	10.66	11.29
PTEN	YWHAQ	634	933	645	928	960	0.350	13.54	11.76	11.40	13.38	12.12	12.00	12.36	13.08	11.45	11.29
RBMS1	YWHAQ	796	694	625	945	999	0.468	12.12	11.76	8.75	13.38	10.14	12.00	12.67	13.08	10.49	11.29
NFATC3	YY1AP1	702	808	747	422	936	0.493	10.43	12.47	6.98	10.86	9.05	10.77	9.33	11.30	10.96	12.09
YY1AP1	ZBTB14	401	837	580	154	489	0.000	12.47	9.01	10.86	8.39	10.77	8.92	11.30	8.21	12.09	8.61
CLCC1	ZBTB18	458	620	280	945	856	0.474	8.19	11.26	8.71	11.96	9.20	10.69	8.99	9.69	10.15	11.87
PPP1R12A	ZBTB20	202	204	598	740	783	0.397	11.64	6.58	10.77	3.93	10.18	6.04	11.85	4.52	11.27	6.86
SEC14L1	ZBTB44	598	556	422	779	933	0.649	13.87	11.26	12.45	10.64	10.54	10.70	13.44	11.09	12.36	12.44
CAMK2G	ZBTB47	961	626	453	802	542	0.021	12.20	9.68	13.75	12.51	10.30	9.18	11.04	10.93	12.36	13.40
STK25	ZBTB47	302	795	842	942	982	0.424	11.38	9.68	12.83	12.51	11.90	9.18	12.00	10.93	13.78	13.40
NUCB2	ZC3H11A	584	696	260	774	637	0.095	10.29	12.23	9.30	12.16	10.99	13.05	10.78	13.06	9.69	12.81
ANKRD10	ZC3H15	984	772	337	745	923	0.376	11.48	10.25	11.54	11.00	12.09	10.88	12.48	10.54	12.90	11.25
MIR568	ZC3H15	101	161	197	437	330	0.000	1.01	10.25	1.40	11.00	2.42	10.88	1.64	10.54	3.62	11.25
CCDC59	ZC3H6	937	751	170	465	772	0.282	9.24	9.20	7.95	9.34	8.80	8.60	8.72	9.17	9.65	10.36
HNRNPM	ZC3H6	790	821	168	384	839	0.372	12.45	9.20	12.31	9.34	12.76	8.60	13.13	9.17	12.93	10.36
TLE1	ZC3H6	770	515	458	777	710	0.203	9.88	9.20	11.23	9.34	12.02	8.60	10.43	9.17	11.81	10.36
GNG2	ZC3HAV1	799	52	704	778	860	0.330	12.13	12.53	10.78	8.42	7.63	10.42	8.88	11.06	7.29	8.69
IFT52	ZC3HAV1	534	321	813	759	924	0.545	9.58	12.53	8.71	8.42	7.92	10.42	9.08	11.06	7.91	8.69
MAN1A1	ZC3HAV1	650	259	855	795	894	0.388	11.60	12.53	8.42	8.42	13.54	10.42	12.14	11.06	9.85	8.69
MYADM	ZC3HAV1	682	82	667	719	730	0.176	13.40	12.53	9.66	8.42	9.98	10.42	12.69	11.06	9.85	8.69
TUBA1A	ZC3HAV1	402	120	810	678	902	0.560	13.17	12.53	14.99	8.42	8.88	10.42	12.56	11.06	9.58	8.69
ABCB6	ZCCHC24	145	227	604	454	946	0.840	7.87	8.32	7.90	12.42	8.43	11.82	6.78	11.49	9.16	12.40
ANKRD27	ZCCHC24	800	251	777	763	930	0.440	10.51	8.32	10.08	12.42	8.85	11.82	10.23	11.49	10.83	12.40
CCT4	ZCCHC6	441	901	227	682	974	0.656	11.36	12.11	11.87	8.35	11.52	11.02	11.78	10.47	12.30	10.33
CCT8	ZCCHC6	546	914	262	705	931	0.529	11.62	12.11	11.73	8.35	11.86	11.02	12.18	10.47	12.54	10.33
DROSHA	ZCCHC6	471	868	503	525	862	0.529	9.91	12.11	10.95	8.35	10.01	11.02	10.34	10.47	10.79	10.33
DNTTIP2	ZDHHC17	910	950	725	679	837	0.135	10.93	10.58	10.13	10.98	10.18	10.00	10.79	10.64	11.66	10.72
APMAP	ZFP36L1	144	217	74	417	775	0.550	13.88	14.17	11.98	11.93	14.10	14.15	11.96	14.75	10.81	12.55
BUB3	ZFP36L1	645	402	665	640	910	0.595	11.10	14.17	10.26	11.93	11.07	14.15	11.01	14.75	10.86	12.55
CORO1C	ZFP36L1	430	427	417	480	874	0.748	12.04	14.17	11.17	11.93	11.44	14.15	13.02	14.75	11.37	12.55
SACM1L	ZFP36L1	453	264	445	92	793	0.586	10.78	14.17	10.61	11.93	10.75	14.15	11.01	14.75	9.99	12.55
UBE2J1	ZFP36L1	337	516	111	631	950	0.827	12.43	14.17	10.04	11.93	10.91	14.15	11.42	14.75	10.33	12.55
APMAP	ZFP36L2	293	148	745	199	914	0.706	13.88	12.67	11.98	10.47	14.10	12.58	11.96	14.32	10.81	12.15
SLBP	ZFYVE26	960	675	907	928	937	0.150	10.85	10.64	10.36	9.91	10.01	9.96	10.14	10.83	9.79	10.99
VCPKMT	ZFYVE26	832	826	306	560	847	0.335	9.71	10.64	7.71	9.91	8.45	9.96	8.15	10.83	8.53	10.99
BECN1	ZHX3	721	628	768	968	955	0.374	11.06	8.90	9.93	12.13	9.52	11.14	10.02	11.23	11.41	11.54
FDFT1	ZHX3	816	547	396	779	866	0.411	12.22	8.90	12.13	12.13	12.16	11.14	12.33	11.23	12.45	11.54
PARP6	ZHX3	901	651	278	939	982	0.469	11.64	8.90	11.96	12.13	10.81	11.14	11.59	11.23	11.82	11.54
SPATS2L	ZHX3	728	592	619	812	881	0.387	8.58	8.90	11.34	12.13	11.96	11.14	11.46	11.23	11.27	11.54
VOPP1	ZHX3	708	708	640	761	939	0.469	12.16	8.90	11.81	12.13	10.58	11.14	11.07	11.23	10.87	11.54
VPS37C	ZHX3	704	492	445	608	949	0.742	10.59	8.90	9.57	12.13	9.37	11.14	10.04	11.23	10.59	11.54
PRKRA	ZNF106	309	871	500	926	650	0.150	9.31	12.05	10.11	12.23	9.85	10.79	10.01	12.54	11.87	15.36
KIF1B	ZNF25	711	878	623	909	988	0.415	11.81	8.57	14.55	11.13	11.45	8.07	11.55	9.39	14.58	10.98
STK40	ZNF32	373	764	472	691	914	0.601	13.50	8.61	10.98	9.78	11.96	9.12	12.09	8.82	13.13	10.50
BRD8	ZNF394	453	868	889	660	971	0.483	11.24	11.61	11.55	7.74	11.20	8.93	10.88	9.37	11.06	9.41
C6orf106	ZNF438	95	396	649	739	823	0.452	12.16	11.42	13.04	7.67	13.10	8.14	12.59	9.19	14.15	10.63
DDX42	ZNF438	561	768	903	815	980	0.436	11.58	11.42	12.13	7.67	11.89	8.14	12.57	9.19	12.52	10.63
ASB10	ZNF511	101	108	96	50	861	0.722	1.72	9.55	0.21	8.46	0.60	9.92	0.28	8.53	10.74	9.74
C22orf39	ZNF592	920	949	950	999	979	0.059	10.34	12.23	11.01	10.85	9.63	11.14	9.78	11.29	12.49	12.15
BAIAP2-AS1	ZNF683	25	0	127	180	0	0.000	9.19	7.80	11.71	0.81	9.16	2.95	9.67	3.67	6.66	1.69
ASB10	ZNF76	101	108	96	50	953	0.906	1.72	10.66	0.21	10.52	0.60	10.92	0.28	10.66	10.74	11.01
D2HGDH	ZNRF1	725	590	756	550	905	0.499	10.54	8.98	9.55	10.12	11.53	9.90	10.54	9.64	10.66	10.86
ERBB2	ZNRF1	490	6	728	559	773	0.403	9.14	8.98	9.47	10.12	11.38	9.90	12.06	9.64	10.91	10.86
BARD1	ZRANB1	742	477	592	841	268	0.000	8.04	11.22	5.67	11.27	6.47	11.24	7.78	11.15	8.88	12.66
FAM126A	ZRANB1	844	555	907	903	811	0.128	9.19	11.22	8.24	11.27	9.44	11.24	10.83	11.15	11.27	12.66
